# Supplementary material for: Brønsted acid catalyzed Ficini [2 + 2] cycloaddition of ynamides with enones
Source: Royal Society of Chemistry journal article supplement (doi:10.1039/d4ob00470a), 2024-01-01

SUPPORTING INFORMATION

**Brønsted acid catalyzed Ficini [2 + 2] cycloaddition of ynamides with enones**

Jinyue Chen, Nanfang Wang, Chaofan Qi, Junbiao Chang\*, and Xiao-Na Wang\*

*Key Laboratory of Advanced Drug Preparation Technologies, Ministry of Education, School of Pharmaceutical Sciences, Zhengzhou University, Zhengzhou, Henan 450001, P. R. China.*

**Table of Contents**

|                                                                                                                  |      |
|------------------------------------------------------------------------------------------------------------------|------|
| Part I Experimental Part.....                                                                                    | S2   |
| General Information.....                                                                                         | S2   |
| 1.1 Optimization of the Reaction Conditions.....                                                                 | S2   |
| 1.2 Reaction Scope of the [2 + 2] Cycloaddition.....                                                             | S3   |
| 1.3 [2 + 2] Cycloaddition of <i>N</i> -acyl ynamides.....                                                        | S20  |
| 1.4 Chemical Transformations of Cyclobutenamides <b>3</b> .....                                                  | S21  |
| 1.5 Failed [2 + 2] Cycloadditions. ....                                                                          | S23  |
| References.....                                                                                                  | S24  |
| Part II Copies of <sup>1</sup> H NMR, <sup>13</sup> C{ <sup>1</sup> H} NMR, and NOESY Spectra.....               | S25  |
| <sup>1</sup> H NMR and <sup>13</sup> C{ <sup>1</sup> H} NMR Spectra of <b>3</b> , <b>4</b> , and <b>5b</b> ..... | S25  |
| NOESY Spectra of Cyclobutenamides <b>3</b> .....                                                                 | S89  |
| NOESY, COSY, HSQC, and HMBC Spectra of Cyclobutenamides <b>3y</b> and <b>3z</b> .....                            | S117 |

## Part I Experimental Part

### General Information

Unless otherwise indicated, all starting materials were obtained from commercial supplies and used as received. Ynamides **1a**,<sup>1</sup> **1b**,<sup>2</sup> **1c**,<sup>3</sup> **1d**,<sup>4</sup> **1e**,<sup>5</sup> **1f**,<sup>6</sup> **1g**,<sup>7</sup> **1h**,<sup>6</sup> **1i**,<sup>8</sup> **1j**,<sup>8</sup> **1k**,<sup>1</sup> **1l**,<sup>1</sup> **1m**,<sup>9</sup> **1n**,<sup>1</sup> **1o**,<sup>10</sup> **1p**,<sup>11</sup> **1q**,<sup>1</sup> **1r**,<sup>12</sup> and **1s**<sup>13</sup> were known compounds and synthesized according to the literature, and the data were matched with the reported values. All reactions were performed in oven-dried glassware under a nitrogen atmosphere unless otherwise stated. All catalysts were added in the glove box. Solvents were distilled prior to use. Chromatographic separations were performed using 200~300 mesh silica gel. <sup>1</sup>H NMR and <sup>13</sup>C{<sup>1</sup>H} NMR spectra were obtained on a Bruker's Ascend<sup>TM</sup> 400 NMR spectrometer using CDCl<sub>3</sub> as the solvent with TMS or residual solvent as standard unless otherwise noted. ABq represents the splitting of two hydrogens on the same carbon. <sup>13</sup>C{<sup>1</sup>H} NMR (100 MHz) spectra were reported in ppm with the internal chloroform signal at 77.2 ppm as the standard. Infrared spectra were obtained on a PerkinElmer FT/IR spectrophotometer and relative intensities are expressed qualitatively as s (strong), m (medium), and w (weak). TLC analysis was performed using 254 nm polyester-backed plates and visualized using UV and KMnO<sub>4</sub> stain. High-resolution mass spectra (HRMS) were performed on a Bruker MicrOTOF-Q II mass spectrometer.

### 1.1 Optimization of the Reaction Conditions.

Entry 13 (1.0 mmol synthetic method): To an oven-dried tube was added ynamide **1a**<sup>1</sup> (358.9 mg, 1.20 mmol), cyclohexenone **2a** (96.13 mg, 1.00 mmol), DCE (5.0 mL, ynamide *concn* = 0.24 M), and Tf<sub>2</sub>NH (56.2 mg, 0.20 mmol) at rt. Then the reaction vessel was capped and stirred at rt for 10.0 min. After the reaction was judged to be complete by TLC, the reaction mixture was filtered through a short pad of silica gel. Then the filtrate was concentrated in vacuo and purified by flash silica gel column chromatography [isocratic eluent: 10:1 petroleum ether/EtOAc] to afford cyclobutenamide **3a** (356.1 mg, 0.90 mmol) in 90% yield.

**Table S1. Optimization of the Reaction Conditions**

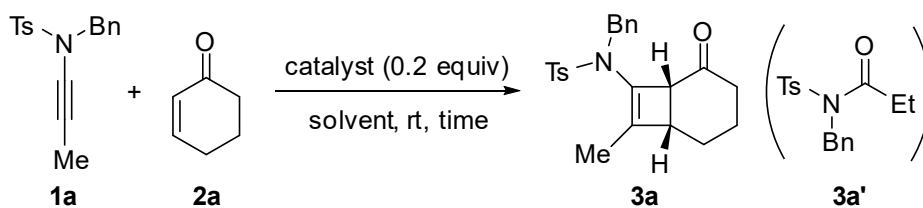

| entry <sup>a</sup> | catalyst                           | solvent                         | time (min) | yield <sup>b</sup> (%) |            |
|--------------------|------------------------------------|---------------------------------|------------|------------------------|------------|
|                    |                                    |                                 |            | <b>3a</b>              | <b>3a'</b> |
| 1                  | Tf <sub>2</sub> O                  | CH <sub>2</sub> Cl <sub>2</sub> | 10.0       | 55                     | 30         |
| 2                  | TfOMe                              | CH <sub>2</sub> Cl <sub>2</sub> | 10.0       | 70                     | 0          |
| 3                  | TMSOTf                             | CH <sub>2</sub> Cl <sub>2</sub> | 10.0       | 75                     | 20         |
| 4                  | TBSOTf                             | CH <sub>2</sub> Cl <sub>2</sub> | 10.0       | 75                     | 12         |
| 5                  | TIPSOTf                            | CH <sub>2</sub> Cl <sub>2</sub> | 10.0       | 74                     | 18         |
| 6                  | TfOH                               | CH <sub>2</sub> Cl <sub>2</sub> | 10.0       | 64                     | 28         |
| 7                  | Tf <sub>2</sub> NH                 | CH <sub>2</sub> Cl <sub>2</sub> | 10.0       | 90                     | trace      |
| 8                  | BF <sub>3</sub> •Et <sub>2</sub> O | CH <sub>2</sub> Cl <sub>2</sub> | 5.0        | 87                     | 10         |
| 9                  | Tf <sub>2</sub> NH                 | toluene                         | 10.0       | 85                     | 9          |
| 10                 | Tf <sub>2</sub> NH                 | 1,4-dioxane                     | 10.0       | 63                     | 13         |
| 11                 | Tf <sub>2</sub> NH                 | THF                             | 25.0       | 18                     | 22         |
| 12                 | Tf <sub>2</sub> NH                 | DCE                             | 10.0       | 93                     | trace      |
| 13 <sup>c</sup>    | Tf <sub>2</sub> NH                 | DCE                             | 10.0       | 90                     | trace      |

<sup>a</sup>Unless otherwise noted, reactions were carried out using **1a** (0.36 mmol) and **2a** (0.30 mmol) with catalyst (0.06 mmol) in solvent (1.5 mL) under N<sub>2</sub>. <sup>b</sup>Isolated yields. <sup>c</sup>**1a** (1.20 mmol) and **2a** (1.00 mmol) were added.

## 1.2 Reaction Scope of the [2 + 2] Cycloaddition.

Cyclobutenamides **3a**,<sup>2</sup> **3b**,<sup>2</sup> **3d**,<sup>2</sup> **3e**,<sup>2</sup> **3u**,<sup>14</sup> and **3z**<sup>2</sup> were known compounds, the data were matched with reported values. Cyclobutenamides **3c**, **3f**, **3g**, **3h**, **3i**, **3j**, **3k**, **3l**, **3m**, **3n**, **3o-3t**, **3v-3y**, **3aa**, and **3ab** were new compounds.

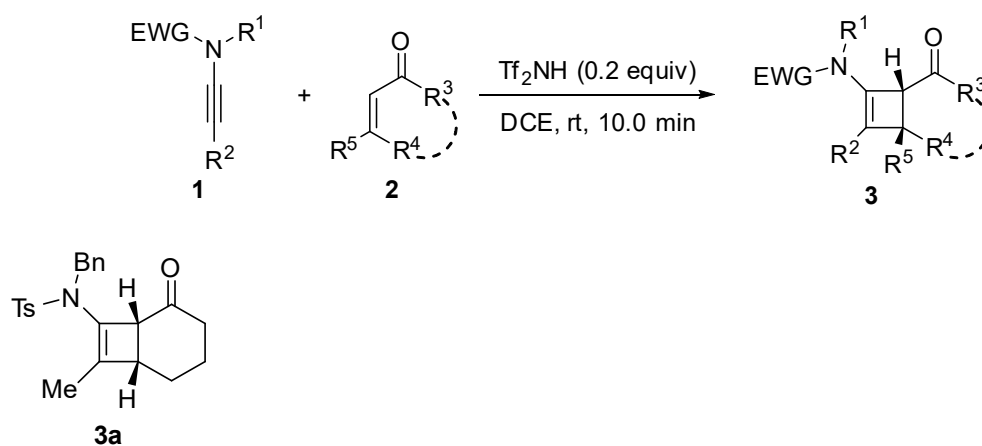

To an oven-dried tube was added ynamide **1a**<sup>1</sup> (107.8 mg, 0.36 mmol), cyclohexenone **2a** (28.8 mg, 0.30 mmol), DCE (1.5 mL, ynamide *concn* = 0.24 M), and Tf<sub>2</sub>NH (16.9 mg, 0.06 mmol) at rt. Then the reaction vessel was capped and stirred at rt for 10.0 min. After the reaction was judged to be complete by TLC, the reaction mixture was purified by flash silica gel column chromatography [isocratic eluent: 10:1 petroleum ether /EtOAc] to afford cyclobutenamide **3a** (110.1 mg, 0.28 mmol) in 93% yield.

**3a**: *R<sub>f</sub>* = 0.19 [6:1 petroleum ether/EtOAc]; white solid; mp = 114–115 °C; <sup>1</sup>H NMR (400 MHz, CDCl<sub>3</sub>) δ 7.74 (d, 2H, *J* = 8.3 Hz), 7.34-7.27 (m, 7H), 4.63, 4.56 (ABq, 2H, *J<sub>AB</sub>* = 15.0 Hz), 3.18 (dq, 1H, *J* = 4.6, 2.3 Hz), 2.75 (br, 1H), 2.45 (s, 3H), 1.81-1.77 (m, 2H), 1.68-1.67 (m, 3H), 1.45-1.39 (m, 2H), 1.33-1.22 (m, 2H); <sup>13</sup>C{<sup>1</sup>H} NMR (100 MHz, CDCl<sub>3</sub>) δ 210.7, 144.1, 144.0, 136.6, 136.5, 129.9, 128.6, 127.9, 127.7, 127.6, 126.7, 53.9, 51.3, 40.5, 38.6, 23.8, 21.8, 17.1, 12.6. Spectral data are in agreement with literature values<sup>2</sup>.

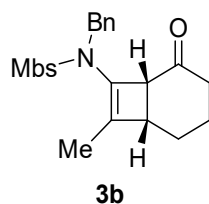

To an oven-dried tube was added ynamide **1b**<sup>2</sup> (113.5 mg, 0.36 mmol), cyclohexenone **2a** (28.8 mg, 0.30 mmol), DCE (1.5 mL, ynamide *concn* = 0.24 M), and Tf<sub>2</sub>NH (16.9 mg, 0.06 mmol) at rt. Then the reaction vessel was capped and stirred at rt for 10.0 min. After the reaction was judged to be complete by TLC, the reaction mixture was purified by flash silica gel column chromatography [isocratic eluent: 10:1 petroleum ether /EtOAc] to afford cyclobutenamide **3b** (114.7 mg, 0.28 mmol) in 93% yield.

**3b**: *R<sub>f</sub>* = 0.23 [5:1 petroleum ether/EtOAc]; white solid; mp = 128–129 °C; <sup>1</sup>H NMR (400 MHz, CDCl<sub>3</sub>) 7.79 (d, 2H, *J* = 8.9 Hz), 7.33-7.27 (m, 5H), 7.00 (d, 2H, *J* = 8.9 Hz), 4.61, 4.55 (ABq, 2H, *J<sub>AB</sub>* = 15.0 Hz), 3.89 (s, 3H), 3.19 (dq, 1H, *J* = 4.7, 2.3 Hz), 2.75 (br, 1H), 1.88-1.75 (m, 3H), 1.68-1.67 (m, 3H), 1.48-1.39 (m, 2H), 1.28-1.22 (m, 1H); <sup>13</sup>C{<sup>1</sup>H} NMR (100 MHz, CDCl<sub>3</sub>) δ 210.7, 163.3, 144.0, 136.5, 131.2, 129.7, 128.6, 127.9, 127.7, 126.9, 114.4, 55.8, 54.0, 51.3, 40.5, 38.6, 23.8, 17.1, 12.6. Spectral data are in agreement with literature values<sup>2</sup>.

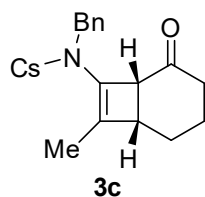

To an oven-dried tube was added ynamide **1c**<sup>3</sup> (114.8 mg, 0.36 mmol), cyclohexenone **2a** (28.8 mg, 0.30 mmol), DCE (1.5 mL, ynamide *concn* = 0.24 M), and Tf<sub>2</sub>NH (16.9 mg, 0.06 mmol) at rt. Then the reaction vessel was capped and stirred at rt for 10.0 min. After the reaction was judged to be complete by TLC, the reaction mixture was purified by flash silica gel column chromatography [isocratic eluent: 10:1 petroleum ether /EtOAc] to afford cyclobutenamide **3c** (103.8 mg, 0.25 mmol) in 83% yield.

**3c**:  $R_f$  = 0.33 [5:1 petroleum ether/EtOAc]; white solid; mp = 114–115 °C; <sup>1</sup>H NMR (400 MHz, CDCl<sub>3</sub>) δ 7.80 (d, 2H,  $J$  = 8.6 Hz), 7.51 (d, 2H,  $J$  = 8.6 Hz), 7.34-7.27 (m, 5H), 4.63, 4.56 (ABq, 2H,  $J_{AB}$  = 14.9 Hz), 3.19 (dq, 1H,  $J$  = 4.6, 2.4 Hz), 2.76 (br, 1H), 1.86-1.77 (m, 3H), 1.66-1.65 (m, 3H), 1.50-1.43 (m, 2H), 1.31-1.22 (m, 1H); <sup>13</sup>C{<sup>1</sup>H} NMR (100 MHz, CDCl<sub>3</sub>) δ 210.4, 144.9, 139.7, 138.1, 136.1, 129.5, 129.1, 128.7, 128.0, 127.9, 126.3, 53.7, 51.5, 40.7, 38.6, 23.8, 17.2, 12.6; IR (neat) (cm<sup>-1</sup>) 2928m, 2865w, 1686s, 1521m, 1294w, 626s; HRMS (ESI):  $m/z$  calcd for C<sub>22</sub>H<sub>23</sub>ClNO<sub>3</sub>S [M + H]<sup>+</sup> 416.1082, found 416.1080.

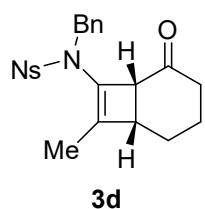

To an oven-dried tube was added ynamide **1d**<sup>4</sup> (118.9 mg, 0.36 mmol), cyclohexenone **2a** (28.8 mg, 0.30 mmol), DCE (1.5 mL, ynamide *concn* = 0.24 M), and Tf<sub>2</sub>NH (16.9 mg, 0.06 mmol) at rt. Then the reaction vessel was capped and stirred at rt for 10.0 min. After the reaction was judged to be complete by TLC, the reaction mixture was purified by flash silica gel column chromatography [isocratic eluent: 10:1 petroleum ether /EtOAc] to afford cyclobutenamide **3d** (98.2 mg, 0.23 mmol) in 77% yield.

**3d**:  $R_f$  = 0.29 [5:1 petroleum ether/EtOAc]; white solid; mp = 115–116 °C; <sup>1</sup>H NMR (400 MHz, CDCl<sub>3</sub>) δ 8.39 (d, 2H,  $J$  = 8.8 Hz), 8.04 (d, 2H,  $J$  = 8.8 Hz), 7.35-7.28 (m,

5H), 4.66, 4.58 (ABq, 2H,  $J_{AB} = 14.8\text{Hz}$ ), 3.19 (br, 1H), 2.79 (br, 1H), 1.96-1.79 (m, 3H), 1.67-1.66 (m, 3H), 1.55-1.47 (m, 2H), 1.32-1.25 (m, 1H);  $^{13}\text{C}\{^1\text{H}\}$  NMR (100 MHz,  $\text{CDCl}_3$ )  $\delta$  210.1, 150.4, 146.1, 145.5, 135.6, 128.9, 128.8, 128.2, 128.1, 125.8, 124.5, 53.4, 51.8, 41.0, 38.7, 23.8, 17.2, 12.6. Spectral data are in agreement with literature values<sup>2</sup>.

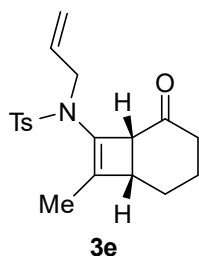

To an oven-dried tube was added ynamide **1e**<sup>5</sup> (89.8 mg, 0.36 mmol), cyclohexenone **2a** (28.8 mg, 0.30 mmol), DCE (1.5 mL, ynamide *concn* = 0.24 M), and  $\text{Tf}_2\text{NH}$  (16.9 mg, 0.06 mmol) at rt. Then the reaction vessel was capped and stirred at rt for 10.0 min. After the reaction was judged to be complete by TLC, the reaction mixture was purified by flash silica gel column chromatography [isocratic eluent: 10:1 petroleum ether /EtOAc] to afford cyclobutenamide **3e** (95.1 mg, 0.28 mmol) in 92% yield.

**3e**:  $R_f = 0.17$  [5:1 petroleum ether/EtOAc]; white solid; mp = 100–101 °C;  $^1\text{H}$  NMR (400 MHz,  $\text{CDCl}_3$ ),  $\delta$  7.67 (d, 2H,  $J = 8.3$  Hz), 7.29 (d, 2H,  $J = 8.0$  Hz), 5.82-5.72 (m, 1H), 5.26-5.14 (m, 2H), 4.13-3.97 (m, 2H), 3.28 (br, 1H), 2.88 (br, 1H), 2.43 (s, 3H), 2.15-2.09 (m, 1H), 1.97-1.87 (m, 2H), 1.74-1.73 (m, 3H), 1.65-1.53 (m, 3H);  $^{13}\text{C}\{^1\text{H}\}$  NMR (100 MHz,  $\text{CDCl}_3$ )  $\delta$  210.5, 143.9, 143.2, 136.8, 133.7, 129.8, 127.6, 126.9, 117.8, 53.9, 50.3, 40.6, 38.6, 23.9, 21.8, 17.3, 12.6. Spectral data are in agreement with literature values<sup>2</sup>.

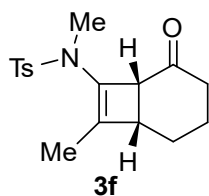

To an oven-dried tube was added ynamide **1f**<sup>6</sup> (80.38 mg, 0.36 mmol), cyclohexenone **2a** (28.8 mg, 0.30 mmol), DCE (1.5 mL, ynamide *concn* = 0.24 M), and  $\text{Tf}_2\text{NH}$  (16.9 mg, 0.06 mmol) at rt. Then the reaction vessel was capped and stirred at rt for 10.0 min. After the reaction was judged to be complete by TLC, the reaction mixture was purified by flash silica gel column chromatography [isocratic

eluent: 10:1 petroleum ether /EtOAc] to afford cyclobutenamide **3f** (80.8 mg, 0.25 mmol) in 84% yield.

**3f**:  $R_f = 0.25$  [5:1 petroleum ether/EtOAc]; colourless oil;  $^1\text{H}$  NMR (400 MHz,  $\text{CDCl}_3$ ),  $\delta$  7.66 (d, 2H,  $J = 8.3$  Hz), 7.30 (d, 2H,  $J = 8.0$  Hz), 3.32 (br, 1H), 3.02 (s, 3H), 2.88 (br, 1H), 2.43 (s, 3H), 2.19-2.14 (m, 1H), 2.01-1.88 (m, 2H), 1.77-1.76 (m, 3H), 1.73-1.53 (m, 3H);  $^{13}\text{C}\{^1\text{H}\}$  NMR (100 MHz,  $\text{CDCl}_3$ )  $\delta$  210.7, 144.0, 139.6, 135.8, 129.7, 128.2, 127.6, 53.8, 40.2, 38.7, 35.5, 24.0, 21.8, 17.4, 12.7; IR (neat) ( $\text{cm}^{-1}$ ) 2932m, 2855w, 1595m, 1402w, 1013w, 887m, 675s; HRMS (ESI):  $m/z$  calcd for  $\text{C}_{17}\text{H}_{21}\text{NNaO}_3\text{S}$   $[\text{M} + \text{Na}]^+$  342.1134, found 342.1126.

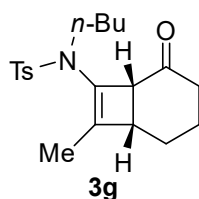

To an oven-dried tube was added ynamide **1g**<sup>7</sup> (95.5 mg, 0.36 mmol), cyclohexenone **2a** (28.8 mg, 0.30 mmol), DCE (1.5 mL, ynamide *concn* = 0.24 M), and  $\text{Tf}_2\text{NH}$  (16.9 mg, 0.06 mmol) at rt. Then the reaction vessel was capped and stirred at rt for 10.0 min. After the reaction was judged to be complete by TLC, the reaction mixture was purified by flash silica gel column chromatography [isocratic eluent: 10:1 petroleum ether /EtOAc] to afford cyclobutenamide **3g** (80.4 mg, 0.22 mmol) in 74% yield.

**3g**:  $R_f = 0.32$  [5:1 petroleum ether/EtOAc]; white solid; mp = 61–62 °C;  $^1\text{H}$  NMR (400 MHz,  $\text{CDCl}_3$ ),  $\delta$  7.65 (d, 2H,  $J = 8.3$  Hz), 7.27 (d, 2H,  $J = 8.6$  Hz), 3.48-3.33 (m, 2H), 3.31 (br, 1H), 2.90 (br, 1H), 2.42 (s, 3H), 2.12-2.06 (m, 1H), 1.98-1.89 (m, 2H), 1.75-1.74 (m, 3H), 1.64-1.60 (m, 2H), 1.52-1.44 (m, 2H), 1.37-1.25 (m, 3H), 0.91 (t, 3H,  $J = 7.3$  Hz);  $^{13}\text{C}\{^1\text{H}\}$  NMR (100 MHz,  $\text{CDCl}_3$ )  $\delta$  210.4, 143.7, 143.5, 137.1, 129.7, 127.5, 127.0, 53.8, 47.6, 40.5, 38.6, 31.5, 24.0, 21.8, 19.6, 17.4, 13.9, 12.6; IR (neat) ( $\text{cm}^{-1}$ ) 2957s, 2727m, 1693s, 1458m, 1031m, 815s, 572m; HRMS (ESI):  $m/z$  calcd for  $\text{C}_{20}\text{H}_{28}\text{NO}_3\text{S}$   $[\text{M} + \text{H}]^+$  362.1784, found 362.1784.

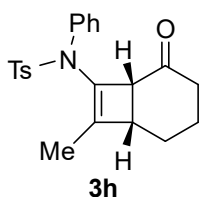

To an oven-dried tube was added ynamide **2h**<sup>6</sup> (102.73 mg, 0.36 mmol), cyclohexenone **1a** (28.8 mg, 0.30 mmol), DCE (1.5 mL, ynamide *concn* = 0.24 M), and Tf<sub>2</sub>NH (16.9 mg, 0.06 mmol) at rt. Then the reaction vessel was capped and stirred at rt for 10.0 min. After the reaction was judged to be complete by TLC, the reaction mixture was purified by flash silica gel column chromatography [isocratic eluent: 10:1 petroleum ether /EtOAc] to afford cyclobutenamide **3h** (81.0 mg, 0.21 mmol) in 71% yield.

**3h**: *R<sub>f</sub>* = 0.38 [5:1 petroleum ether/EtOAc]; white solid; mp = 152–153 °C; <sup>1</sup>H NMR (400 MHz, CDCl<sub>3</sub>), δ 7.58 (d, 2H, *J* = 8.3 Hz), 7.32–7.29 (m, 3H), 7.25–7.22 (m, 4H), 3.39 (br, 1H), 2.89 (br, 1H), 2.46–2.38 (m, 4H), 2.12–2.01 (m, 1H), 1.94–1.82 (m, 2H), 1.70–1.59 (m, 5H); <sup>13</sup>C {<sup>1</sup>H} NMR (100 MHz, CDCl<sub>3</sub>) δ 210.9, 144.0, 142.9, 138.4, 136.8, 129.7, 129.5, 129.4, 129.0, 128.4, 128.1, 55.5, 40.1, 39.3, 24.1, 21.8, 17.7, 12.2; IR (neat) (cm<sup>-1</sup>) 2966m, 2861w, 1685s, 1492m, 1226w, 1089s, 542m; HRMS (ESI): *m/z* calcd for C<sub>22</sub>H<sub>24</sub>NO<sub>3</sub>S [M + H]<sup>+</sup> 382.1471, found 382.1471.

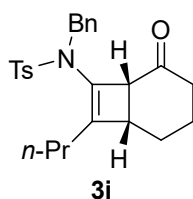

To an oven-dried tube was added ynamide **2i**<sup>8</sup> (117.9 mg, 0.36 mmol), cyclohexenone **1a** (28.8 mg, 0.30 mmol), DCE (1.5 mL, ynamide *concn* = 0.24 M), and Tf<sub>2</sub>NH (16.9 mg, 0.06 mmol) at rt. Then the reaction vessel was capped and stirred at rt for 10.0 min. After the reaction was judged to be complete by TLC, the reaction mixture was purified by flash silica gel column chromatography [isocratic eluent: 10:1 petroleum ether /EtOAc] to afford cyclobutenamide **3i** (110.2 mg, 0.26 mmol) in 87% yield.

**3i**: *R<sub>f</sub>* = 0.28 [5:1 petroleum ether/EtOAc]; white solid; mp = 55–56 °C; <sup>1</sup>H NMR (400 MHz, CDCl<sub>3</sub>), δ 7.74 (d, 2H, *J* = 8.2 Hz), 7.34–7.25 (m, 7H), 4.69, 4.51 (ABq, 2H, *J<sub>AB</sub>* = 14.9 Hz), 3.18 (br, 1H), 2.82 (br, 1H), 2.45 (s, 3H), 2.30–2.22 (m, 1H), 1.95–1.78 (m, 4H), 1.46–1.25 (m, 5H), 0.80 (t, 3H, *J* = 7.4 Hz); <sup>13</sup>C {<sup>1</sup>H} NMR (100 MHz, CDCl<sub>3</sub>) δ 210.7, 148.4, 144.0, 136.8, 136.4, 129.8, 128.6, 128.1, 127.8, 127.7, 126.3, 53.6, 51.5, 40.6, 37.0, 29.1, 24.3, 21.8, 19.8, 17.3, 14.4; IR (neat) (cm<sup>-1</sup>) 2925m, 2867w, 1595w, 1351m, 1070w, 856m, 556s; HRMS (ESI): *m/z* calcd for C<sub>25</sub>H<sub>30</sub>NO<sub>3</sub>S [M + H]<sup>+</sup>



424.1941, found 424.1941.

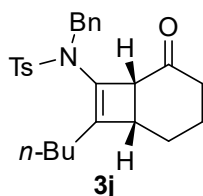

To an oven-dried tube was added ynamide **1j**<sup>8</sup> (122.9 mg, 0.36 mmol), cyclohexenone **2a** (28.8 mg, 0.30 mmol), DCE (1.5 mL, ynamide *concn* = 0.24 M), and Tf<sub>2</sub>NH (16.9 mg, 0.06 mmol) at rt. Then the reaction vessel was capped and stirred at rt for 10.0 min. After the reaction was judged to be complete by TLC, the reaction mixture was purified by flash silica gel column chromatography [isocratic eluent: 10:1 petroleum ether /EtOAc] to afford cyclobutenamide **3j** (121.6 mg, 0.28 mmol) in 93% yield.

**3j**: *R<sub>f</sub>* = 0.27 [5:1 petroleum ether/EtOAc]; white solid; mp = 57–58 °C; <sup>1</sup>H NMR (400 MHz, CDCl<sub>3</sub>), δ 7.73 (d, 2H, *J* = 8.3 Hz), 7.36-7.26 (m, 7H), 4.70, 4.49 (ABq, 2H, *J<sub>AB</sub>* = 14.8 Hz), 3.19 (br, 1H), 2.81 (br, 1H), 2.45 (s, 3H), 2.31-2.24 (m, 1H), 1.93-1.78 (m, 4H), 1.47-1.16 (m, 7H), 0.85 (t, 3H, *J* = 7.0 Hz); <sup>13</sup>C {<sup>1</sup>H} NMR (100 MHz, CDCl<sub>3</sub>) δ 210.6, 148.6, 144.0, 136.7, 136.4, 129.8, 128.6, 128.1, 127.8, 127.7, 126.1, 53.6, 51.5, 40.6, 37.0, 28.5, 26.8, 24.3, 22.9, 21.8, 17.3, 14.1; IR (neat) (cm<sup>-1</sup>) 2925m, 2869w, 1598w, 1348m, 1090w, 832m, 557s; HRMS (ESI): *m/z* calcd for C<sub>26</sub>H<sub>32</sub>NO<sub>3</sub>S [M + H]<sup>+</sup> 438.2097, found 438.2090.

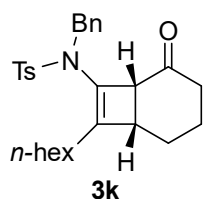

To an oven-dried tube was added ynamide **1k**<sup>1</sup> (133.0 mg, 0.36 mmol), cyclohexenone **2a** (28.8 mg, 0.30 mmol), DCE (1.5 mL, ynamide *concn* = 0.24 M), and Tf<sub>2</sub>NH (16.9 mg, 0.06 mmol) at rt. Then the reaction vessel was capped and stirred at rt for 10.0 min. After the reaction was judged to be complete by TLC, the reaction mixture was purified by flash silica gel column chromatography [isocratic eluent: 10:1 petroleum ether /EtOAc] to afford cyclobutenamide **3k** (118 mg, 0.25 mmol) in 85% yield.

**3k**: *R<sub>f</sub>* = 0.29 [5:1 petroleum ether/EtOAc]; white solid; mp = 62–63 °C; <sup>1</sup>H NMR

(400 MHz, CDCl<sub>3</sub>),  $\delta$  7.73 (d, 2H,  $J = 8.3$  Hz), 7.33-7.23 (m, 7H), 4.70, 4.49 (ABq, 2H,  $J_{AB} = 14.9$  Hz), 3.19 (br, 1H), 2.81 (br, 1H), 2.45 (s, 3H), 2.29-2.23 (m, 1H), 1.93-1.77 (m, 4H), 1.46-1.33 (m, 4H), 1.31-1.13 (m, 7H), 0.89 (t, 3H,  $J = 7.0$  Hz); <sup>13</sup>C{<sup>1</sup>H} NMR (100 MHz, CDCl<sub>3</sub>)  $\delta$  210.7, 148.6, 144.0, 136.8, 136.4, 129.8, 128.6, 128.1, 127.8, 127.7, 126.1, 53.6, 51.5, 40.6, 37.0, 31.8, 29.6, 27.1, 26.4, 24.3, 22.8, 21.8, 17.3, 14.3; IR (neat) (cm<sup>-1</sup>) 2925s, 2853m, 1594w, 1347s, 1070w, 863m, 557s; HRMS (ESI):  $m/z$  calcd for C<sub>28</sub>H<sub>36</sub>NO<sub>3</sub>S [M + H]<sup>+</sup> 466.2410, found 466.2410.

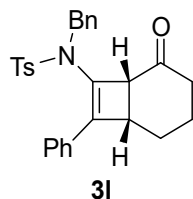

To an oven-dried tube was added ynamide **1l**<sup>1</sup> (130.1 mg, 0.36 mmol), cyclohexenone **2a** (28.8 mg, 0.30 mmol), DCE (1.5 mL, ynamide *concn* = 0.24 M), and Tf<sub>2</sub>NH (16.9 mg, 0.06 mmol) at rt. Then the reaction vessel was capped and stirred at rt for 10.0 min. After the reaction was judged to be complete by TLC, the reaction mixture was purified by flash silica gel column chromatography [isocratic eluent: 10:1 petroleum ether /EtOAc] to afford cyclobutenamide **3l** (123.9 mg, 0.27 mmol) in 90% yield.

**3l**:  $R_f = 0.20$  [5:1 petroleum ether/EtOAc]; white solid; mp = 151–152 °C; <sup>1</sup>H NMR (400 MHz, CDCl<sub>3</sub>)  $\delta$  7.84 (d, 2H,  $J = 8.3$  Hz), 7.37-7.34 (m, 7H), 7.18-7.17 (m, 3H), 7.02-7.00 (m, 2H), 4.55, 4.42 (ABq, 2H,  $J_{AB} = 14.4$  Hz), 3.29 (s, 2H), 2.46 (s, 3H), 2.18-1.93 (m, 3H), 1.61-1.48 (m, 3H); <sup>13</sup>C{<sup>1</sup>H} NMR (100 MHz, CDCl<sub>3</sub>)  $\delta$  210.8, 144.7, 144.3, 136.3, 135.5, 132.1, 130.0, 128.9, 128.6, 128.52, 128.48, 128.1, 128.0, 127.4, 126.8, 55.5, 51.2, 40.6, 37.4, 24.9, 21.8, 17.5; IR (neat) (cm<sup>-1</sup>) 2924m, 2869w, 1693s, 1368s, 1143m, 662s, 654s; HRMS (ESI):  $m/z$  calcd for C<sub>28</sub>H<sub>28</sub>NO<sub>3</sub>S [M + H]<sup>+</sup> 458.1784, found 458.1784.

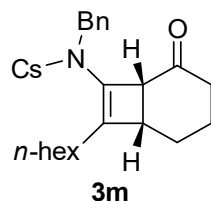

To an oven-dried tube was added ynamide **1m**<sup>9</sup> (140.1 mg, 0.36 mmol), cyclohexenone **2a** (28.8 mg, 0.30 mmol), DCE (1.5 mL, ynamide *concn* = 0.24 M),

and Tf<sub>2</sub>NH (16.9 mg, 0.06 mmol) at rt. Then the reaction vessel was capped and stirred at rt for 10.0 min. After the reaction was judged to be complete by TLC, the reaction mixture was purified by flash silica gel column chromatography [isocratic eluent: 10:1 petroleum ether /EtOAc] to afford cyclobutenamide **3m** (121.3 mg, 0.25mmol) in 83% yield.

**3m**:  $R_f = 0.25$  [6:1 petroleum ether/EtOAc]; yellow oil; <sup>1</sup>H NMR (400 MHz, CDCl<sub>3</sub>),  $\delta$  7.79 (d, 2H,  $J = 8.6$  Hz), 7.50 (d, 2H,  $J = 8.6$  Hz), 7.30-7.25 (m, 5H), 4.69, 4.50 (ABq, 2H,  $J_{AB} = 14.7$  Hz), 3.20 (br, 1H), 2.82 (br, 1H), 2.26-2.19 (m, 1H), 1.94-1.77 (m, 3H), 1.50-1.42 (m, 2H), 1.34-1.26 (m, 4H), 1.25-1.12 (m, 6H), 0.89 (t, 3H,  $J = 7.0$  Hz); <sup>13</sup>C {<sup>1</sup>H} NMR (100 MHz, CDCl<sub>3</sub>)  $\delta$  210.3, 149.3, 139.7, 138.2, 136.0, 129.5, 129.1, 128.7, 128.1, 127.9, 125.7, 53.3, 51.7, 40.8, 37.0, 31.8, 29.5, 27.1, 26.3, 24.3, 22.7, 17.4, 14.3; IR (neat) (cm<sup>-1</sup>) 2924s, 2185m, 1690s, 1476w, 1330m, 847m, 623s; HRMS (ESI):  $m/z$  calcd for C<sub>27</sub>H<sub>33</sub>ClNO<sub>3</sub>S [M + H]<sup>+</sup> 486.1864, found 486.1864.

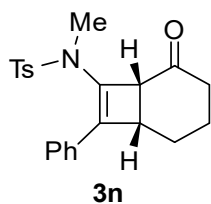

To an oven-dried tube was added ynamide **1n**<sup>1</sup> (102.7 mg, 0.36 mmol), cyclohexenone **2a** (28.8 mg, 0.30 mmol), DCE (1.5 mL, ynamide *concn* = 0.24 M), and Tf<sub>2</sub>NH (16.9 mg, 0.06 mmol) at rt. Then the reaction vessel was capped and stirred at rt for 10.0 min. After the reaction was judged to be complete by TLC, the reaction mixture was purified by flash silica gel column chromatography [isocratic eluent: 10:1 petroleum ether /EtOAc] to afford cyclobutenamide **3n** (104.6 mg, 0.27 mmol) in 91% yield.

**3n**:  $R_f = 0.23$  [5:1 petroleum ether/EtOAc]; white solid; mp = 91–92 °C; <sup>1</sup>H NMR (400 MHz, CDCl<sub>3</sub>),  $\delta$  7.77 (d, 2H,  $J = 8.3$  Hz), 7.43-7.40 (m, 2H), 7.37-7.30 (m, 5H), 3.54 (d, 1H,  $J = 4.3$  Hz), 3.48 (br, 1H), 2.97 (s, 3H), 2.71-2.64 (m, 1H), 2.43 (s, 3H), 2.25-2.16 (m, 2H), 2.07-1.95 (m, 1H), 1.77-1.67 (m, 2H); <sup>13</sup>C {<sup>1</sup>H} NMR (100 MHz, CDCl<sub>3</sub>)  $\delta$  210.9, 144.1, 141.8, 135.5, 131.7, 129.9, 128.8, 128.6, 127.9, 127.3, 55.0, 40.2, 37.4, 35.7, 24.8, 21.7, 17.8, one carbon missing due to overlap, overlapped signal at 128.8 ppm; IR (neat) (cm<sup>-1</sup>) 2937m, 2875w, 1692s, 1494m, 1229w, 1157m, 676s; HRMS (ESI):  $m/z$  calcd for C<sub>22</sub>H<sub>24</sub>NO<sub>3</sub>S [M + H]<sup>+</sup> 382.1471, found 382.1470.

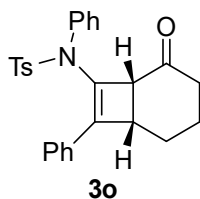

To an oven-dried tube was added ynamide **1o**<sup>10</sup> (125.08 mg, 0.36 mmol), cyclohexenone **2a** (28.8 mg, 0.30 mmol), DCE (1.5 mL, ynamide *concn* = 0.24 M), and Tf<sub>2</sub>NH (16.9 mg, 0.06 mmol) at rt. Then the reaction vessel was capped and stirred at rt for 10.0 min. After the reaction was judged to be complete by TLC, the reaction mixture was purified by flash silica gel column chromatography [isocratic eluent: 10:1 petroleum ether /EtOAc] to afford cyclobutenamide **3o** (109.3 mg, 0.25 mmol) in 82% yield.

**3o**:  $R_f$  = 0.39 [5:1 petroleum ether/EtOAc]; white solid; mp = 140–141 °C; <sup>1</sup>H NMR (400 MHz, CDCl<sub>3</sub>),  $\delta$  7.62–7.58 (m, 2H), 7.55 (d, 2H,  $J$  = 8.3 Hz), 7.37–7.27 (m, 5H), 7.24–7.19 (m, 5H), 3.64 (d, 1H,  $J$  = 4.1 Hz), 3.49–3.44 (m, 1H), 2.72–2.66 (m, 1H), 2.39 (s, 3H), 2.25–2.07 (m, 3H), 1.80–1.71 (m, 2H); <sup>13</sup>C{<sup>1</sup>H} NMR (100 MHz, CDCl<sub>3</sub>)  $\delta$  211.2, 145.0, 144.2, 138.5, 136.1, 131.2, 129.5, 129.4, 129.1, 128.7, 128.5, 128.2, 127.7, 127.3, 56.1, 40.5, 37.2, 24.9, 21.8, 17.8, one carbon missing due to overlap, overlapped signal at 128.7 ppm; IR (neat) (cm<sup>-1</sup>) 2924m, 2858w, 1688s, 1447m, 1236w, 1054m, 583s; HRMS (ESI):  $m/z$  calcd for C<sub>27</sub>H<sub>26</sub>NO<sub>3</sub>S [M + H]<sup>+</sup> 444.1628, found 444.1628.

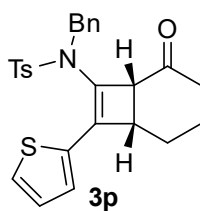

To an oven-dried tube was added ynamide **1p**<sup>11</sup> (132.5 mg, 0.36 mmol), cyclohexenone **2a** (28.8 mg, 0.30 mmol), DCE (1.5 mL, ynamide *concn* = 0.24 M), and Tf<sub>2</sub>NH (16.9 mg, 0.06 mmol) at rt. Then the reaction vessel was capped and stirred at rt for 10.0 min. After the reaction was judged to be complete by TLC, the reaction mixture was purified by flash silica gel column chromatography [isocratic eluent: 10:1 petroleum ether /EtOAc] to afford cyclobutenamide **3p** (59.5 mg, 0.13 mmol) in 43% yield.

**3p**:  $R_f$  = 0.22 [5:1 petroleum ether/EtOAc]; white solid; mp = 153–154 °C; <sup>1</sup>H NMR

(400 MHz, CDCl<sub>3</sub>),  $\delta$  7.84 (d, 2H,  $J = 8.3$  Hz), 7.36-7.34 (m, 3H), 7.21-7.18 (m, 3H), 7.13-7.11 (m, 2H), 7.03-7.01 (m, 2H), 4.57, 4.52 (ABq, 2H,  $J_{AB} = 14.4$  Hz), 3.41 (d, 1H,  $J = 4.2$  Hz), 3.27-3.24 (m, 1H), 2.46 (s, 3H), 2.17-2.13 (m, 1H), 2.01-1.85 (m, 2H), 1.65-1.56 (m, 1H), 1.47-1.36 (m, 2H); <sup>13</sup>C{<sup>1</sup>H} NMR (100 MHz, CDCl<sub>3</sub>)  $\delta$  209.9, 144.3, 138.2, 136.3, 135.5, 134.2, 130.1, 128.6, 128.5, 128.04, 128.02, 127.5, 127.3, 127.2, 124.4, 55.4, 50.9, 40.7, 38.3, 24.9, 21.8, 17.2; IR (neat) (cm<sup>-1</sup>) 2922m, 2850w, 1690s, 1453m, 1353s, 930m, 557s; HRMS (ESI):  $m/z$  calcd for C<sub>26</sub>H<sub>26</sub>NO<sub>3</sub>S<sub>2</sub> [M + H]<sup>+</sup> 464.1349, found 464.1349.

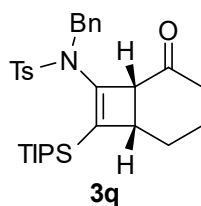

To an oven-dried tube was added ynamide **1q**<sup>1</sup> (159.0 mg, 0.36 mmol), cyclohexenone **2a** (28.8 mg, 0.30 mmol), DCE (1.5 mL, ynamide *concn* = 0.24 M), and Tf<sub>2</sub>NH (16.9 mg, 0.06 mmol) at rt. Then the reaction vessel was capped and stirred at rt for 10.0 min. After the reaction was judged to be complete by TLC, the reaction mixture was purified by flash silica gel column chromatography [isocratic eluent: 10:1 petroleum ether /EtOAc] to afford cyclobutenamide **3q** (82.1 mg, 0.15 mmol) in 51% yield.

**3q**:  $R_f = 0.21$  [5:1 petroleum ether/EtOAc]; white solid; mp = 139–140 °C; <sup>1</sup>H NMR (400 MHz, CDCl<sub>3</sub>),  $\delta$  7.73 (d, 2H,  $J = 8.3$  Hz), 7.32-7.21 (m, 4H), 7.25-7.23 (m, 3H), 4.78, 4.59 (ABq, 2H,  $J_{AB} = 14.6$  Hz), 3.67 (d, 1H,  $J = 4.3$  Hz), 2.97-2.94 (m, 1H), 2.45 (s, 3H), 2.02-1.82 (m, 4H), 1.71-1.60 (m, 2H), 1.33-1.25 (m, 3H), 1.07 (d, 9H,  $J = 7.5$  Hz), 1.00 (d, 9H,  $J = 7.5$  Hz); <sup>13</sup>C{<sup>1</sup>H} NMR (100 MHz, CDCl<sub>3</sub>)  $\delta$  210.5, 150.9, 144.8, 144.0, 137.0, 136.0, 129.7, 129.3, 128.5, 128.1, 128.0, 56.3, 52.4, 41.1, 39.1, 27.4, 21.8, 19.5, 19.4, 18.1, 12.2; IR (neat) (cm<sup>-1</sup>) 3032w, 2926m, 1697s, 1495m, 1347s, 1029w, 552m; HRMS (ESI):  $m/z$  calcd for C<sub>31</sub>H<sub>44</sub>NO<sub>3</sub>SSi [M + H]<sup>+</sup> 538.2806, found 538.2806.

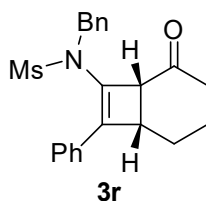

To an oven-dried tube was added ynamide **1r**<sup>12</sup> (102.6 mg, 0.36 mmol), cyclohexenone **2a** (28.8 mg, 0.30 mmol), DCE (1.5 mL, ynamide *concn* = 0.24 M), and Tf<sub>2</sub>NH (16.9 mg, 0.06 mmol) at rt. Then the reaction vessel was capped and stirred at rt for 10.0 min. After the reaction was judged to be complete by TLC, the reaction mixture was purified by flash silica gel column chromatography [isocratic eluent: 10:1 petroleum ether /EtOAc] to afford cyclobutenamide **3r** (67.4 mg, 0.22 mmol) in 74% yield.

**3r**: *R<sub>f</sub>* = 0.16 [5:1 petroleum ether/EtOAc]; yellow oil; <sup>1</sup>H NMR (400 MHz, CDCl<sub>3</sub>), δ 7.47-7.45 (m, 2H), 7.39-7.31 (m, 4H), 7.24-7.20 (m, 4H), 4.66, 4.61 (ABq, 2H, *J*<sub>AB</sub> = 14.6 Hz), 3.52 (d, 1H, *J* = 4.2 Hz), 3.38 (br, 1H), 3.02 (s, 3H), 2.54-2.49 (m, 1H), 2.20-2.11 (m, 2H), 1.81-1.60 (m, 3H); <sup>13</sup>C{<sup>1</sup>H} NMR (100 MHz, CDCl<sub>3</sub>) δ 211.6, 144.2, 135.5, 131.7, 129.1, 128.8, 128.7, 128.3, 127.3, 127.0, 54.9, 52.3, 41.8, 41.1, 37.1, 25.0, 17.5, one carbon missing due to overlap, overlapped signal at 128.8 ppm; IR (neat) (cm<sup>-1</sup>) 3430w, 2928m, 1696s, 1350s, 1120w, 1085w, 696m; HRMS (ESI): *m/z* calcd for C<sub>22</sub>H<sub>24</sub>NO<sub>3</sub>S [M + H]<sup>+</sup> 382.1471, found 382.1471.

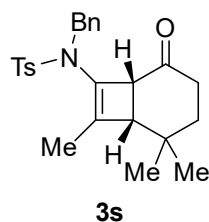

To an oven-dried tube was added ynamide **1a**<sup>1</sup> (107.8 mg, 0.36 mmol), 4,4-dimethyl-cyclohexenone **2b** (38.4 mg, 0.30 mmol), DCE (1.5 mL, ynamide *concn* = 0.24 M), and Tf<sub>2</sub>NH (16.9 mg, 0.06 mmol) at rt. Then the reaction vessel was capped and stirred at rt for 10.0 min. After the reaction was judged to be complete by TLC, the reaction mixture was purified by flash silica gel column chromatography [isocratic eluent: 10:1 petroleum ether /EtOAc] to afford cyclobutenamide **3s** (104.4 mg, 0.25 mmol) in 82% yield.

**3s**: *R<sub>f</sub>* = 0.31 [5:1 petroleum ether/EtOAc]; white solid; mp = 114–115 °C; <sup>1</sup>H NMR (400 MHz, CDCl<sub>3</sub>), δ 7.73 (d, 2H, *J* = 8.3 Hz), 7.34-7.27 (m, 7H), 4.63, 4.51 (ABq, 2H, *J*<sub>AB</sub> = 15.0 Hz), 3.17 (br, 1H), 2.45 (s, 3H), 2.34 (br, 1H), 2.02-1.92 (m, 1H), 1.79-1.78 (m, 3H), 1.56-1.48 (m, 2H), 1.19-1.13 (m, 1H), 1.00 (s, 3H), 0.77 (s, 3H); <sup>13</sup>C{<sup>1</sup>H} NMR (100 CDCl<sub>3</sub>) δ 211.7, 145.4, 144.1, 136.8, 136.4, 129.9, 128.7, 128.3, 127.9, 127.8, 127.6, 54.1, 51.5, 51.1, 35.8, 32.6, 30.9, 28.1, 25.2, 21.8, 15.5; IR (neat)

( $\text{cm}^{-1}$ ) 3450w, 2954m, 1693s, 1496m, 1165s, 1044w, 544m; HRMS (ESI):  $m/z$  calcd for  $\text{C}_{25}\text{H}_{30}\text{NO}_3\text{S}$   $[\text{M} + \text{H}]^+$  424.1941, found 424.1941.

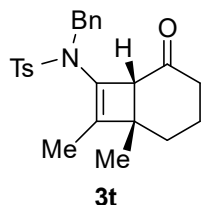

To an oven-dried tube was added ynamide **1a**<sup>1</sup> (107.8 mg, 0.36 mmol), 3-methyl-cyclohexenone **2c** (33.0 mg, 0.30 mmol), DCE (1.5 mL, ynamide *concn* = 0.24 M), and  $\text{Tf}_2\text{NH}$  (16.9 mg, 0.06 mmol) at rt. Then the reaction vessel was capped and stirred at rt for 10.0 min. After the reaction was judged to be complete by TLC, the reaction mixture was purified by flash silica gel column chromatography [isocratic eluent: 10:1 petroleum ether /EtOAc] to afford cyclobutenamide **3t** (51.0 mg, 0.12 mmol) in 42% yield.

**3t**:  $R_f$  = 0.38 [5:1 petroleum ether/EtOAc]; white solid; mp = 112–113 °C;  $^1\text{H}$  NMR (400 MHz,  $\text{CDCl}_3$ ),  $\delta$  7.74 (d, 2H,  $J$  = 8.3 Hz), 7.34-7.27 (m, 7H), 4.66, 4.51 (ABq, 2H,  $J_{AB}$  = 14.8 Hz), 2.74 (q, 1H,  $J$  = 2.2 Hz), 2.45 (s, 3H), 1.78-1.65 (m, 3H), 1.55 (d, 3H,  $J$  = 2.3 Hz), 1.46-1.42 (m, 1H), 1.30-1.23 (m, 2H), 0.94 (s, 3H);  $^{13}\text{C}\{^1\text{H}\}$  NMR (100 MHz,  $\text{CDCl}_3$ )  $\delta$  211.8, 148.1, 144.2, 136.8, 136.5, 130.0, 128.7, 128.2, 128.0, 127.8, 126.0, 62.1, 51.6, 43.3, 39.9, 31.1, 23.8, 22.0, 18.5, 10.2; IR (neat) ( $\text{cm}^{-1}$ ) 3442w, 2923s, 1696m, 1352s, 1164m, 1018w, 545m; HRMS (ESI):  $m/z$  calcd for  $\text{C}_{24}\text{H}_{28}\text{NO}_3\text{S}$   $[\text{M} + \text{H}]^+$  410.1784, found 410.1783.

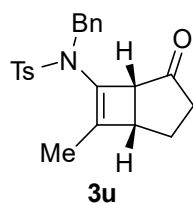

To an oven-dried tube was added ynamide **1a**<sup>1</sup> (107.8 mg, 0.36 mmol), cyclopentenone **2d** (24.6 mg, 0.30 mmol), DCE (1.5 mL, ynamide *concn* = 0.24 M), and  $\text{Tf}_2\text{NH}$  (16.9 mg, 0.06 mmol) at rt. Then the reaction vessel was capped and stirred at rt for 10.0 min. After the reaction was judged to be complete by TLC, the reaction mixture was purified by flash silica gel column chromatography [isocratic eluent: 10:1 petroleum ether /EtOAc] to afford cyclobutenamide **3u** (110.4 mg, 0.29 mmol) in 96% yield.

**3u**:  $R_f = 0.17$  [5:1 petroleum ether/EtOAc]; white solid; mp = 100–101 °C;  $^1\text{H}$  NMR (400 MHz,  $\text{CDCl}_3$ ),  $\delta$  7.72 (d, 2H,  $J = 8.3$  Hz), 7.35–7.24 (m, 7H), 4.51, 4.44 (ABq, 2H,  $J_{AB} = 15.0$  Hz), 2.94 (br, 1H), 2.90 (br, 1H), 2.45 (s, 3H), 1.94–1.78 (m, 2H), 1.74–1.73 (m, 3H), 1.70–1.64 (m, 2H);  $^{13}\text{C}\{^1\text{H}\}$  NMR (100 MHz,  $\text{CDCl}_3$ )  $\delta$  216.0, 144.3, 144.2, 136.5, 136.2, 130.0, 129.2, 128.6, 127.9, 127.8, 127.5, 54.3, 51.3, 40.2, 34.1, 21.8, 19.9, 13.1. Spectral data are in agreement with literature values<sup>15</sup>.

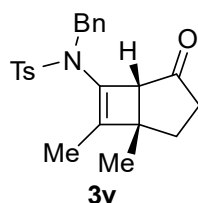

To an oven-dried tube was added ynamide **1a**<sup>1</sup> (107.8 mg, 0.36 mmol), 3-methyl-2-cyclopentenone **2e** (28.8 mg, 0.30 mmol), DCE (1.5 mL, ynamide *concn* = 0.24 M), and  $\text{Tf}_2\text{NH}$  (16.9 mg, 0.06 mmol) at rt. Then the reaction vessel was capped and stirred at rt for 10.0 min. After the reaction was judged to be complete by TLC, the reaction mixture was purified by flash silica gel column chromatography [isocratic eluent: 10:1 petroleum ether /EtOAc] to afford cyclobutenamide **3v** (52.5 mg, 0.13 mmol) in 44% yield.

**3v**:  $R_f = 0.43$  [5:1 petroleum ether/EtOAc]; yellow oil;  $^1\text{H}$  NMR (400 MHz,  $\text{CDCl}_3$ ),  $\delta$  7.73 (d, 2H,  $J = 8.3$  Hz), 7.35–7.24 (m, 7H), 4.48 (s, 2H), 2.53 (br, 1H), 2.46 (s, 3H), 1.94–1.78 (m, 2H), 1.63 (d, 3H,  $J = 1.9$  Hz), 1.44–1.35 (m, 2H), 1.14 (s, 3H);  $^{13}\text{C}\{^1\text{H}\}$  NMR (100 MHz,  $\text{CDCl}_3$ )  $\delta$  216.3, 147.7, 144.1, 136.4, 136.1, 129.9, 128.6, 128.4, 128.0, 127.8, 127.6, 61.1, 51.4, 46.2, 36.0, 26.9, 21.8, 21.3, 10.4; IR (neat) ( $\text{cm}^{-1}$ ) 3031w, 2924s, 1729s, 1351m, 1121w, 1027m, 658m; HRMS (ESI):  $m/z$  calcd for  $\text{C}_{23}\text{H}_{26}\text{NO}_3\text{S}$   $[\text{M} + \text{H}]^+$  396.1628, found 396.1628.

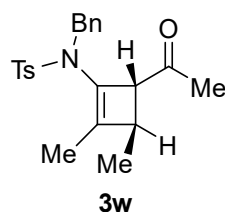

To an oven-dried tube was added ynamide **1a**<sup>1</sup> (107.8 mg, 0.36 mmol), (*E*)-3-penten-2-one **2f** (26.6 mg, 0.30 mmol), DCE (1.5 mL, ynamide *concn* = 0.24 M), and  $\text{Tf}_2\text{NH}$  (16.9 mg, 0.06 mmol) at rt. Then the reaction vessel was capped and stirred at rt for 10.0 min. After the reaction was judged to be complete by TLC, the



reaction mixture was purified by flash silica gel column chromatography [isocratic eluent: 10:1 petroleum ether /EtOAc] to afford cyclobutenamide **3w** (83.2 mg, 0.22 mmol) in 72% yield.

**3w**:  $R_f = 0.52$  [5:1 petroleum ether/EtOAc]; colourless oil;  $^1\text{H}$  NMR (400 MHz,  $\text{CDCl}_3$ ),  $\delta$  7.72 (d, 2H,  $J = 8.3$  Hz), 7.33-7.27 (m, 7H), 4.66, 4.42 (ABq, 2H,  $J_{AB} = 15.0$  Hz), 3.25 (br, 1H), 2.44 (s, 3H), 2.38-2.32 (m, 1H), 1.95 (s, 3H), 1.33-1.32 (m, 3H), 1.02 (d, 3H,  $J = 6.8$  Hz);  $^{13}\text{C}\{^1\text{H}\}$  NMR (100 MHz,  $\text{CDCl}_3$ )  $\delta$  208.1, 143.9, 140.4, 136.5, 129.8, 128.8, 128.6, 128.1, 127.9, 127.4, 63.0, 52.1, 38.1, 28.6, 21.8, 16.9, 12.1, one carbon missing due to overlap; overlapped signal at 127.9 ppm; IR (neat) ( $\text{cm}^{-1}$ ) 3450w, 2960m, 1694s, 1455m, 1166s, 1025w, 609m; HRMS (ESI):  $m/z$  calcd for  $\text{C}_{22}\text{H}_{26}\text{NO}_3\text{S}$  [ $\text{M} + \text{H}$ ] $^+$  384.1628, found 384.1628.

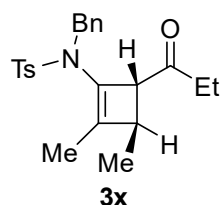

To an oven-dried tube was added ynamide **1a**<sup>1</sup> (107.8 mg, 0.36 mmol), (*E*)-4-hexen-3-one **2g** (29.4 mg, 0.30 mmol), DCE (1.5 mL, ynamide *concn* = 0.24 M), and  $\text{Tf}_2\text{NH}$  (16.9 mg, 0.06 mmol) at rt. Then the reaction vessel was capped and stirred at rt for 10.0 min. After the reaction was judged to be complete by TLC, the reaction mixture was purified by flash silica gel column chromatography [isocratic eluent: 10:1 petroleum ether /EtOAc] to afford cyclobutenamide **3x** (98.8 mg, 0.25 mmol) in 83% yield.

**3x**:  $R_f = 0.54$  [5:1 petroleum ether/EtOAc]; white solid; mp = 69–70 °C; 7.72 (d, 2H,  $J = 8.3$  Hz), 7.32-7.28 (m, 7H), 4.63, 4.44 (ABq, 2H,  $J_{AB} = 14.9$  Hz), 3.31-3.29 (m, 1H), 2.44 (s, 3H), 2.37-2.32 (m, 1H), 2.32-2.26 (m, 2H), 1.26-1.25 (m, 3H), 1.02 (d, 3H,  $J = 6.9$  Hz), 0.92 (t, 3H,  $J = 7.2$  Hz);  $^{13}\text{C}\{^1\text{H}\}$  NMR (100 MHz,  $\text{CDCl}_3$ )  $\delta$  210.1, 143.8, 140.4, 136.6, 136.5, 129.8, 128.7, 128.6, 128.2, 127.8, 127.4, 61.9, 52.2, 38.2, 35.1, 21.7, 16.9, 12.0, 7.6; IR (neat) ( $\text{cm}^{-1}$ ) 3450w, 2922m, 1708s, 1598m, 1354s, 1117w, 598m; HRMS (ESI):  $m/z$  calcd for  $\text{C}_{23}\text{H}_{28}\text{NO}_3\text{S}$  [ $\text{M} + \text{H}$ ] $^+$  398.1784, found 398.1784.

To an oven-dried tube was added ynamide **1a**<sup>1</sup> (107.8 mg, 0.36 mmol), (*E*)-chalcone **2h** (62.5 mg, 0.30 mmol), DCE (1.5 mL, ynamide *concn* = 0.24 M), and  $\text{Tf}_2\text{NH}$  (16.9 mg, 0.06 mmol) at rt. Then the reaction vessel was capped and stirred at

rt for 10.0 min. After the reaction was judged to be complete by TLC, the reaction mixture was purified by flash silica gel column chromatography [isocratic eluent: 10:1 petroleum ether /EtOAc] to afford cyclobutenamide **3y** (126.2 mg, 0.25 mmol) in 81% yield.

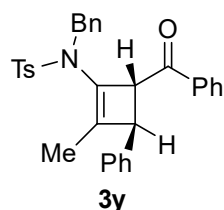

**3y**:  $R_f = 0.38$  [5:1 petroleum ether/EtOAc]; white solid; mp = 69–70 °C;  $^1\text{H}$  NMR (400 MHz,  $\text{CDCl}_3$ ), 7.77 (d, 2H,  $J = 8.4$  Hz), 7.67–7.65 (m, 2H), 7.53–7.49 (m, 1H), 7.45–7.43 (m, 2H), 7.37–7.27 (m, 8H), 7.22 (d, 2H,  $J = 8.1$  Hz), 7.06–7.03 (m, 2H), 4.67 (s, 2H), 4.38–4.36 (m, 1H), 3.46 (br, 1H), 2.37 (s, 3H), 1.20–1.19 (m, 3H);  $^{13}\text{C}\{^1\text{H}\}$  NMR (100 MHz,  $\text{CDCl}_3$ )  $\delta$  197.7, 143.8, 140.0, 139.7, 137.0, 136.8, 136.4, 133.3, 130.9, 129.8, 128.9, 128.7, 128.6, 128.5, 127.8, 127.7, 127.5, 127.4, 60.1, 52.7, 49.5, 21.7, 12.4, one carbon missing due to overlap, overlapped signal at 128.9 ppm; IR (neat) ( $\text{cm}^{-1}$ ) 3029w, 2921s, 1728m, 1350m, 1120w, 812m, 546s; HRMS (ESI):  $m/z$  calcd for  $\text{C}_{32}\text{H}_{30}\text{NO}_3\text{S}$  [ $\text{M} + \text{H}$ ] $^+$  508.1941, found 508.1942.

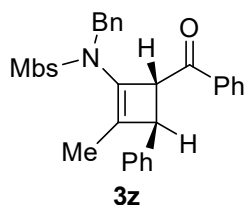

To an oven-dried tube was added ynamide **1b**<sup>2</sup> (113.5 mg, 0.36 mmol), (*E*)-chalcone **2h** (62.5 mg, 0.30 mmol), DCE (1.5 mL, ynamide *concn* = 0.24 M), and  $\text{Tf}_2\text{NH}$  (16.9 mg, 0.06 mmol) at rt. Then the reaction vessel was capped and stirred at rt for 10.0 min. After the reaction was judged to be complete by TLC, the reaction mixture was purified by flash silica gel column chromatography [isocratic eluent: 10:1 petroleum ether /EtOAc] to afford cyclobutenamide **3z** (118.7 mg, 0.23 mmol) in 76% yield.

**3z**:  $R_f = 0.14$  [5:1 petroleum ether/EtOAc]; white solid; mp = 120–121 °C;  $^1\text{H}$  NMR (400 MHz,  $\text{CDCl}_3$ ),  $\delta$  7.82 (d, 2H,  $J = 8.9$  Hz), 7.68 (d, 2H,  $J = 6.9$  Hz), 7.53–7.49 (m, 1H), 7.45–7.43 (m, 2H), 7.37–7.27 (m, 8H), 7.05–7.03 (m, 2H), 6.89–6.87 (m, 2H), 4.69, 4.65 (ABq, 2H,  $J_{AB} = 14.9$  Hz), 4.39–4.37 (m, 1H), 3.81 (s, 3H), 3.46 (br, 1H),

1.22 (t, 3H,  $J = 1.6$  Hz);  $^{13}\text{C}\{^1\text{H}\}$  NMR (100 MHz,  $\text{CDCl}_3$ )  $\delta$  197.8, 163.1, 139.8, 139.4, 136.9, 136.5, 133.2, 131.6, 131.1, 129.8, 128.9, 128.67, 128.64, 128.57, 128.53, 127.8, 127.5, 127.4, 114.3, 60.0, 55.7, 52.5, 49.5, 12.4; IR (neat) ( $\text{cm}^{-1}$ ) 3431s, 2922m, 1701m, 1455s, 1126m, 833m, 555m; HRMS (ESI):  $m/z$  calcd for  $\text{C}_{32}\text{H}_{30}\text{NO}_4\text{S}$  [ $\text{M} + \text{H}$ ] $^+$  524.1890, found 524.1893. Spectral data are in agreement with literature values<sup>2</sup>.

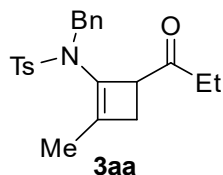

To an oven-dried tube was added ynamide **1a**<sup>1</sup> (107.8 mg, 0.36 mmol), 1-penten-3-one **2i** (25.2 mg, 0.30 mmol), DCE (1.5 mL, ynamide *concn* = 0.24 M), and  $\text{Tf}_2\text{NH}$  (16.9 mg, 0.06 mmol) at rt. Then the reaction vessel was capped and stirred at rt for 10.0 min. After the reaction was judged to be complete by TLC, the reaction mixture was purified by flash silica gel column chromatography [isocratic eluent: 10:1 petroleum ether /EtOAc] to afford cyclobutenamide **3aa** (79.0 mg, 0.21 mmol) in 69% yield.

**3aa**:  $R_f = 0.50$  [5:1 petroleum ether/EtOAc]; colourless oil;  $^1\text{H}$  NMR (400 MHz,  $\text{CDCl}_3$ ),  $\delta$  7.71 (d, 2H,  $J = 8.2$  Hz), 7.32-7.27 (m, 7H), 4.61-4.43 (m, 2H), 3.78-3.75 (m, 1H), 2.44 (s, 3H), 2.33-2.14 (m, 4H), 1.34-1.32 (m, 3H), 0.90 (t, 3H,  $J = 7.3$  Hz);  $^{13}\text{C}\{^1\text{H}\}$  NMR (100 MHz,  $\text{CDCl}_3$ )  $\delta$  210.3, 143.9, 137.5, 136.63, 136.58, 129.9, 129.9, 128.6, 128.3, 127.9, 127.4, 53.6, 52.3, 34.7, 30.9, 21.8, 14.5, 7.6; IR (neat) ( $\text{cm}^{-1}$ ) 3451m, 2923m, 1708s, 1597w, 1350s, 1164s, 814m; HRMS (ESI):  $m/z$  calcd for  $\text{C}_{22}\text{H}_{26}\text{NO}_3\text{S}$  [ $\text{M} + \text{H}$ ] $^+$  384.1628, found 384.1627.

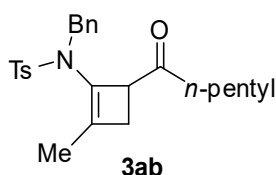

To an oven-dried tube was added ynamide **1a**<sup>1</sup> (107.8 mg, 0.36 mmol), 1-octen-3-one **2j** (37.9 mg, 0.30 mmol), DCE (1.5 mL, ynamide *concn* = 0.24 M), and  $\text{Tf}_2\text{NH}$  (16.9 mg, 0.06 mmol) at rt. Then the reaction vessel was capped and stirred at rt for 10.0 min. After the reaction was judged to be complete by TLC, the reaction mixture was purified by flash silica gel column chromatography [isocratic eluent: 10:1 petroleum ether /EtOAc] to afford cyclobutenamide **3ab** (104.4 mg, 0.25 mmol)

in 82% yield.

**3ab**:  $R_f = 0.61$  [5:1 petroleum ether/EtOAc]; colourless oil;  $^1\text{H}$  NMR (400 MHz,  $\text{CDCl}_3$ ),  $\delta$  7.71 (d, 2H,  $J = 8.2$  Hz), 7.32-7.28 (m, 7H), 4.60-4.43 (m, 2H), 3.77-3.74 (m, 1H), 2.44 (s, 3H), 2.31-2.09 (m, 4H), 1.44-1.13 (m, 9H), 0.88 (t, 3H,  $J = 7.3$  Hz);  $^{13}\text{C}\{^1\text{H}\}$  NMR (100 MHz,  $\text{CDCl}_3$ )  $\delta$  210.1, 143.8, 137.2, 136.75, 136.66, 129.9, 128.6, 128.3, 127.9, 127.4, 53.6, 52.2, 41.5, 31.5, 30.9, 23.2, 22.7, 21.8, 14.5, 14.2, one carbon missing due to overlap, overlapped signal at 127.9 ppm; IR (neat) ( $\text{cm}^{-1}$ ) 3446s, 2955m, 1706m, 1352s, 1164s, 1048w, 665m; HRMS (ESI):  $m/z$  calcd for  $\text{C}_{25}\text{H}_{32}\text{NO}_3\text{S}$   $[\text{M} + \text{H}]^+$  426.2097, found 426.2097.

### 1.3 [2 + 2] Cycloaddition of *N*-acyl ynamides.

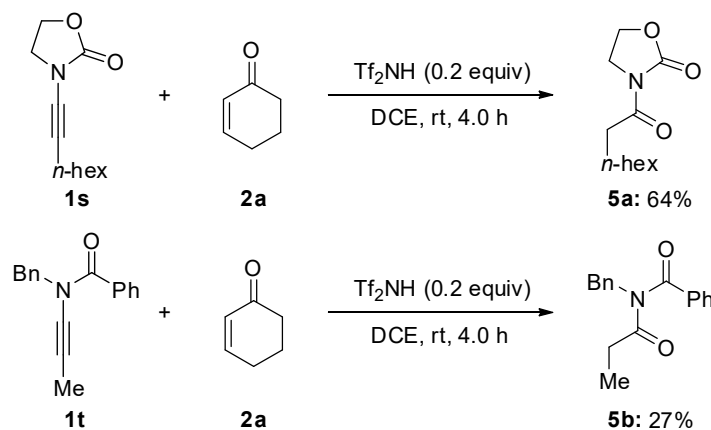

To an oven-dried tube was added ynamide **1s**<sup>1</sup> (70.3 mg, 0.36 mmol), cyclohexenone **2a** (28.8 mg, 0.30 mmol), DCE (1.5 mL, ynamide *concn* = 0.24 M), and  $\text{Tf}_2\text{NH}$  (16.9 mg, 0.06 mmol) at rt. Then the reaction vessel was capped and stirred at rt for 4.0 h. After the reaction was judged to be complete by TLC, the reaction mixture was purified by flash silica gel column chromatography [gradient eluent: 10:1~6:1 petroleum ether/EtOAc] to afford amide **5a** (44.8 mg, 0.23 mmol) in 64% yield. **5a**:  $R_f = 0.30$  [6:1 petroleum ether/EtOAc]; white solid; mp = 39–40 °C;  $^1\text{H}$  NMR (400 MHz,  $\text{CDCl}_3$ )  $\delta$  4.41 (t, 2H,  $J = 8.1$  Hz), 4.02 (t, 2H,  $J = 8.0$  Hz), 2.92 (t, 2H,  $J = 7.5$  Hz), 1.70-1.64 (m, 2H), 1.36-1.35 (m, 8H), 0.88 (t, 3H,  $J = 6.5$  Hz); Spectral data are in agreement with literature values.<sup>13</sup>

Amide **5b** (40.9 mg, 0.19 mmol) was prepared from ynamide **1t**<sup>15</sup> (89.8 mg, 0.36 mmol), and cyclohexenone **2a** (28.8 mg, 0.30 mmol) in 27% yield after stirring at rt

for 4.0 h. **5b**:  $R_f = 0.45$  [10:1 petroleum ether/EtOAc]; colourless oil;  $^1\text{H}$  NMR (400 MHz,  $\text{CDCl}_3$ )  $\delta$  7.56-7.51 (m, 3H), 7.44-7.38 (m, 2H), 7.30-7.21 (m, 5H), 5.00 (s, 2H), 2.41 (q, 2H,  $J = 7.3$  Hz), 1.05 (t, 3H,  $J = 7.3$  Hz);  $^{13}\text{C}\{^1\text{H}\}$  NMR (100 MHz,  $\text{CDCl}_3$ )  $\delta$  177.7, 174.4, 137.6, 136.1, 132.5, 128.9, 128.7, 128.5, 127.9, 127.6, 49.6, 32.1, 9.8; IR (neat) ( $\text{cm}^{-1}$ ) 3334w, 2929w, 1656s, 1346m, 1191m, 1022s, 692s; HRMS (ESI):  $m/z$  calcd for  $\text{C}_{17}\text{H}_{18}\text{NO}_2$   $[\text{M} + \text{H}]^+$  268.1332, found 268.1335.

### 1.4 Chemical Transformations of Cyclobutenamides **3**.

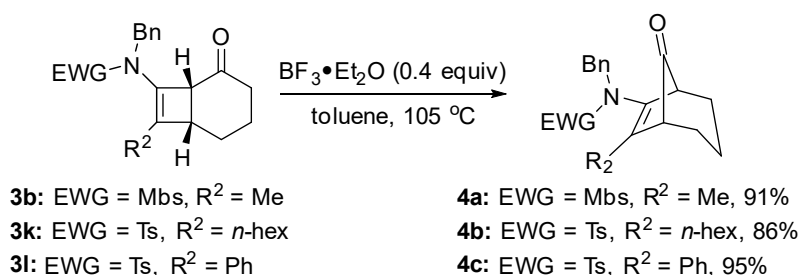

To an oven-dried tube were added cyclobutenamide **3b** (41.2 mg, 0.10 mmol), toluene (1.5 mL, cyclobutenamide concn = 0.067 M) and  $\text{BF}_3 \cdot \text{Et}_2\text{O}$  (4.9  $\mu\text{L}$ , 0.04 mmol) at rt. The reaction vessel was then capped it and directly heated to 105 °C. After stirring at 105 °C for 1.0 h, the reaction mixture was cooled to rt slowly. The crude mixture was purified by flash silica gel column chromatography [gradient eluent: 7:1~5:1 petroleum ether/EtOAc] to afford bicyclic ketone **4a** (37.4 mg, 0.091 mmol) in 91% yield.

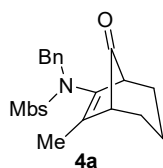

**4a**:  $R_f = 0.28$  [5:1 petroleum ether/EtOAc]; white solid; mp = 114–115 °C;  $^1\text{H}$  NMR (400 MHz,  $\text{CDCl}_3$ )  $\delta$  7.76 (d, 2H,  $J = 8.9$  Hz), 7.33-7.23 (m, 5H), 7.01 (d, 2H,  $J = 8.9$  Hz), 4.68 (d, 1H,  $J = 14.4$  Hz), 4.26 (d, 1H,  $J = 14.5$  Hz), 3.89 (s, 3H), 2.57 (br, 1H), 2.29 (br, 1H), 1.71-1.68 (m, 1H), 1.68 (s, 3H), 1.58-1.50 (m, 2H), 1.46-1.37 (m, 1H), 1.22-1.08 (m, 2H);  $^{13}\text{C}\{^1\text{H}\}$  NMR (100 MHz,  $\text{CDCl}_3$ )  $\delta$  213.4, 163.3, 139.9, 136.2, 131.5, 129.5, 128.7, 128.3, 128.1, 114.6, 55.8, 55.3, 52.9, 50.8, 29.2, 27.6, 17.2, 13.6, one carbon missing due to overlap, overlapped signal at 128.7 ppm; Spectral data are in agreement with literature values<sup>14</sup>.

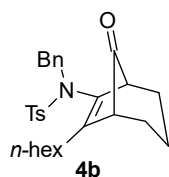

Bicyclic ketone **4b** (39.9 mg, 0.086 mmol) was prepared from cyclobutenamide **3k** (46.5 mg, 0.10 mmol) in 86% yield after stirring at 105 °C for 30.0 min. **4b**:  $R_f = 0.35$  [10:1 petroleum ether/EtOAc]; white solid; mp = 109–110 °C;  $^1\text{H}$  NMR (400 MHz,  $\text{CDCl}_3$ )  $\delta$  7.72 (d, 2H,  $J = 8.0$  Hz), 7.35–7.26 (m, 7H), 4.66 (d, 1H,  $J = 14.3$  Hz), 4.29 (d, 1H,  $J = 14.3$  Hz), 2.68 (br, 1H), 2.46 (s, 3H), 2.29 (br, 1H), 2.23–2.18 (m, 1H), 2.04–1.97 (m, 1H), 1.71–1.52 (m, 6H), 1.46–1.38 (m, 2H), 1.20–1.04 (m, 6H), 0.88 (d, 3H,  $J = 7.2$  Hz);  $^{13}\text{C}$  NMR (100 MHz,  $\text{CDCl}_3$ )  $\delta$  213.2, 144.6, 144.0, 137.2, 136.1, 130.1, 128.7, 128.6, 128.2, 127.8, 127.5, 53.2, 53.1, 50.8, 31.8, 30.0, 29.2, 28.8, 28.6, 27.2, 22.8, 21.8, 17.5, 14.3; IR (neat) ( $\text{cm}^{-1}$ ) 2929br, 2858w, 1761m, 1495m, 1344s, 1156s; HRMS (ESI):  $m/z$  calcd for  $\text{C}_{28}\text{H}_{36}\text{NO}_3\text{S}$   $[\text{M} + \text{H}]^+$  466.2410, found 466.2408.

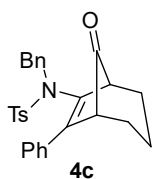

Bicyclic ketone **4c** (43.5 mg, 0.095 mmol) was prepared from cyclobutenamide **3l** (45.8 mg, 0.10 mmol) in 95% yield after stirring at 105 °C for 30.0 min. **4c**:  $R_f = 0.27$  [6:1 petroleum ether/EtOAc]; white solid; mp = 135–136 °C;  $^1\text{H}$  NMR (400 MHz,  $\text{CDCl}_3$ )  $\delta$  7.75 (d, 2H,  $J = 8.1$  Hz), 7.36 (d, 2H,  $J = 8.1$  Hz), 7.28–7.15 (m, 6H), 6.97–6.89 (m, 4H), 4.45 (d, 1H,  $J = 14.4$  Hz), 4.18 (d, 1H,  $J = 14.4$  Hz), 3.06–3.04 (m, 1H), 2.87–2.85 (m, 1H), 2.49 (s, 3H), 2.17–2.12 (m, 1H), 1.89–1.82 (m, 1H), 1.74–1.63 (m, 2H), 1.44–1.39 (m, 1H), 1.29–1.23 (m, 1H);  $^{13}\text{C}$  NMR (100 MHz,  $\text{CDCl}_3$ )  $\delta$  213.1, 144.3, 136.7, 136.3, 135.7, 133.8, 130.4, 130.2, 128.574, 128.566, 128.55, 128.52, 128.2, 127.7, 127.5, 55.4, 54.6, 52.6, 30.0, 29.1, 21.8, 17.5; IR (neat) ( $\text{cm}^{-1}$ ) 2921m, 2859w, 1764s, 1455m, 1348s, 1269w, 1165s; HRMS (ESI):  $m/z$  calcd for  $\text{C}_{28}\text{H}_{28}\text{NO}_3\text{S}$   $[\text{M} + \text{H}]^+$  458.1784, found 458.1793.

## 1.5 Failed [2 + 2] Cycloadditions.

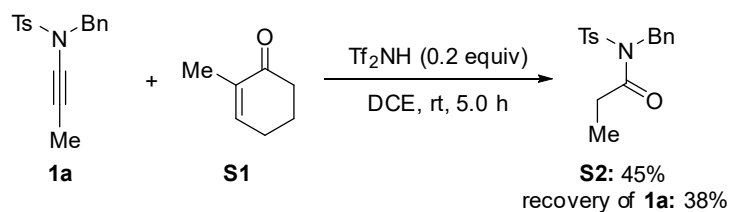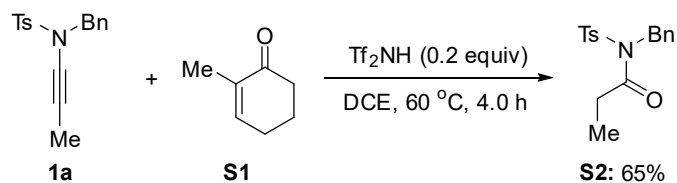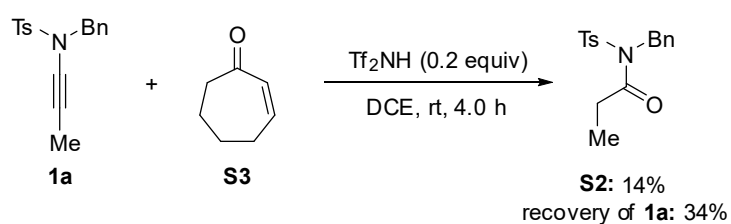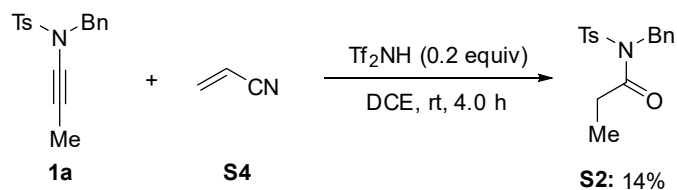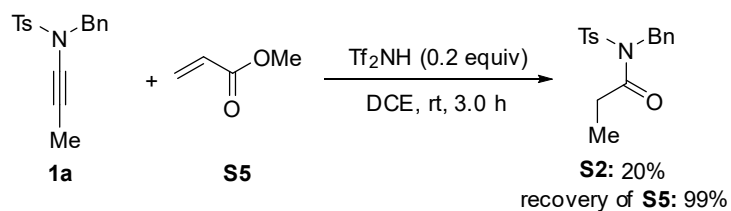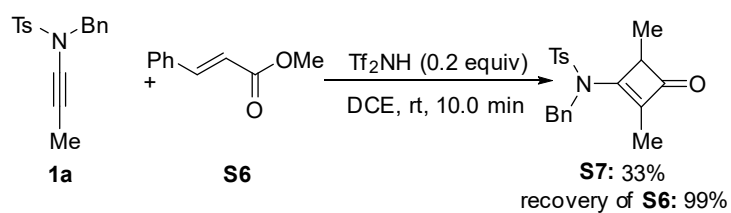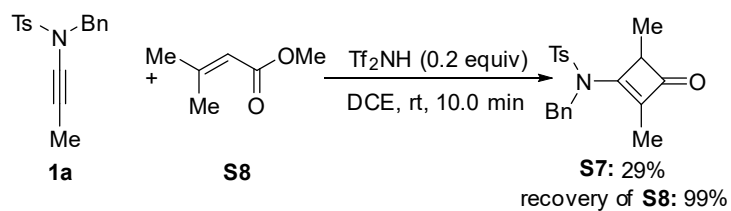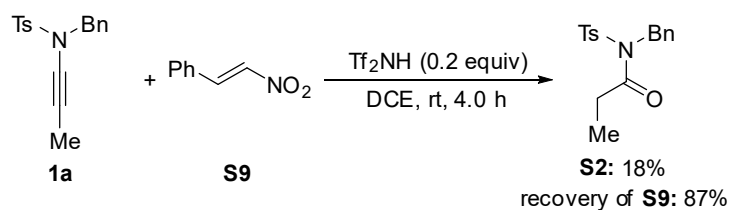

## References

- (1) Y. Zhang, R. P. Hsung, M. R. Tracey, K. C. M. Kurtz and E. L. Vera, *Org. Lett.*, 2004, **6**, 1151-1154.
- (2) H. Li, R. P. Hsung, K. A. DeKorver and Y. Wei, *Org. Lett.*, 2010, **12**, 3780-3783.
- (3) Y. Yang, H. Liu, C. Peng, J. Wu, J. Zhang, Y. Qiao, X.-N. Wang and J. Chang, *Org. Lett.*, 2016, **18**, 5022-5025.
- (4) H. Liu, Y. Yang, S. Wang, J. Wu, X.-N. Wang and J. Chang, *Org. Lett.*, 2015, **17**, 4472-4475.
- (5) K.-B. Wang, R.-Q. Ran, S.-D. Xiu and C.-Y. Li, *Org. Lett.*, 2013, **15**, 2374-2377.
- (6) X. Y. Mak, A. L. Crombie and R. L. Danheiser, *J. Org. Chem.*, 2011, **76**, 1852-1873.
- (7) S. J. Mansfield, C. D. Campbell, M. W. Jones and E. A. Anderson, *Chem. Commun.*, 2015, **51**, 3316-3319.
- (8) H. Liu, Y. Yang, J. Wu, X.-N. Wang and J. Chang, *Chem. Commun.*, 2016, **52**, 6801-6804.
- (9) L. Zhu, Y. Yu, Z. Mao and X. Huang, *Org. Lett.*, 2015, **17**, 30-33.
- (10) M. D. Santos and P. W. Davies, *Chem. Commun.*, 2014, **50**, 6001-6004.
- (11) A. Coste, G. Karthikeyan, F. Couty and G. Evano, *Angew. Chem. Int. Ed.*, 2009, **48**, 4381-4385.
- (12) H. J. Yoo and S. W. Youn, *Org. Lett.*, 2019, **21**, 3422-3426.
- (13) H. Wang, M. Hu, X.-N. Wang and J. Chang, *Org. Biomol. Chem.*, 2022, **20**, 3408-3412.
- (14) X.-N. Wang, E. H. Krenske, R. C. Johnston, K. N. Houk and R. P. Hsung, *J. Am. Chem. Soc.*, 2015, **137**, 5596-5601.
- (15) Y. Wang, M. Hu, L. Ding, Y. Wang, X.-N. Wang and J. Chang, *Org. Lett.*, 2022, **24**, 5056-5061.



## Part II Copies of $^1\text{H}$ NMR, $^{13}\text{C}\{^1\text{H}\}$ NMR, and NOESY Spectra.

### $^1\text{H}$ NMR and $^{13}\text{C}\{^1\text{H}\}$ NMR Spectra of Cyclobutenamides 3, Bicyclic Ketones 4, and Amide 5b.

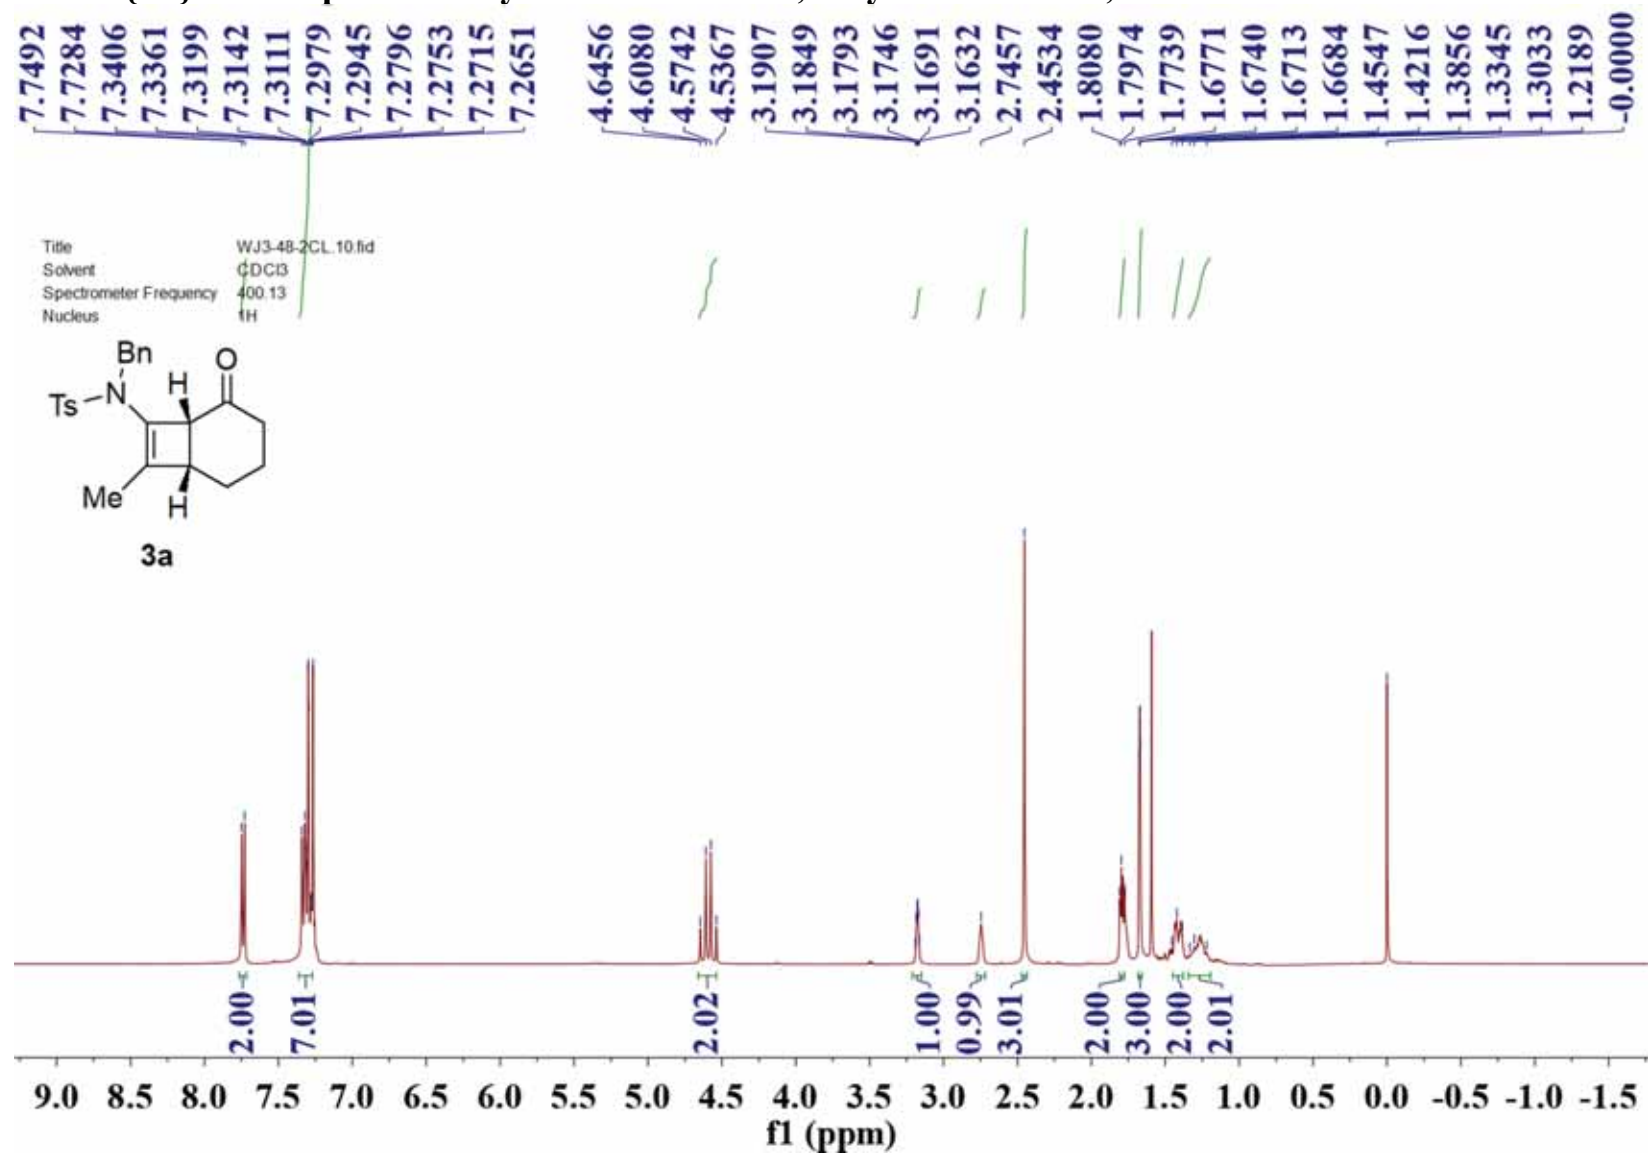

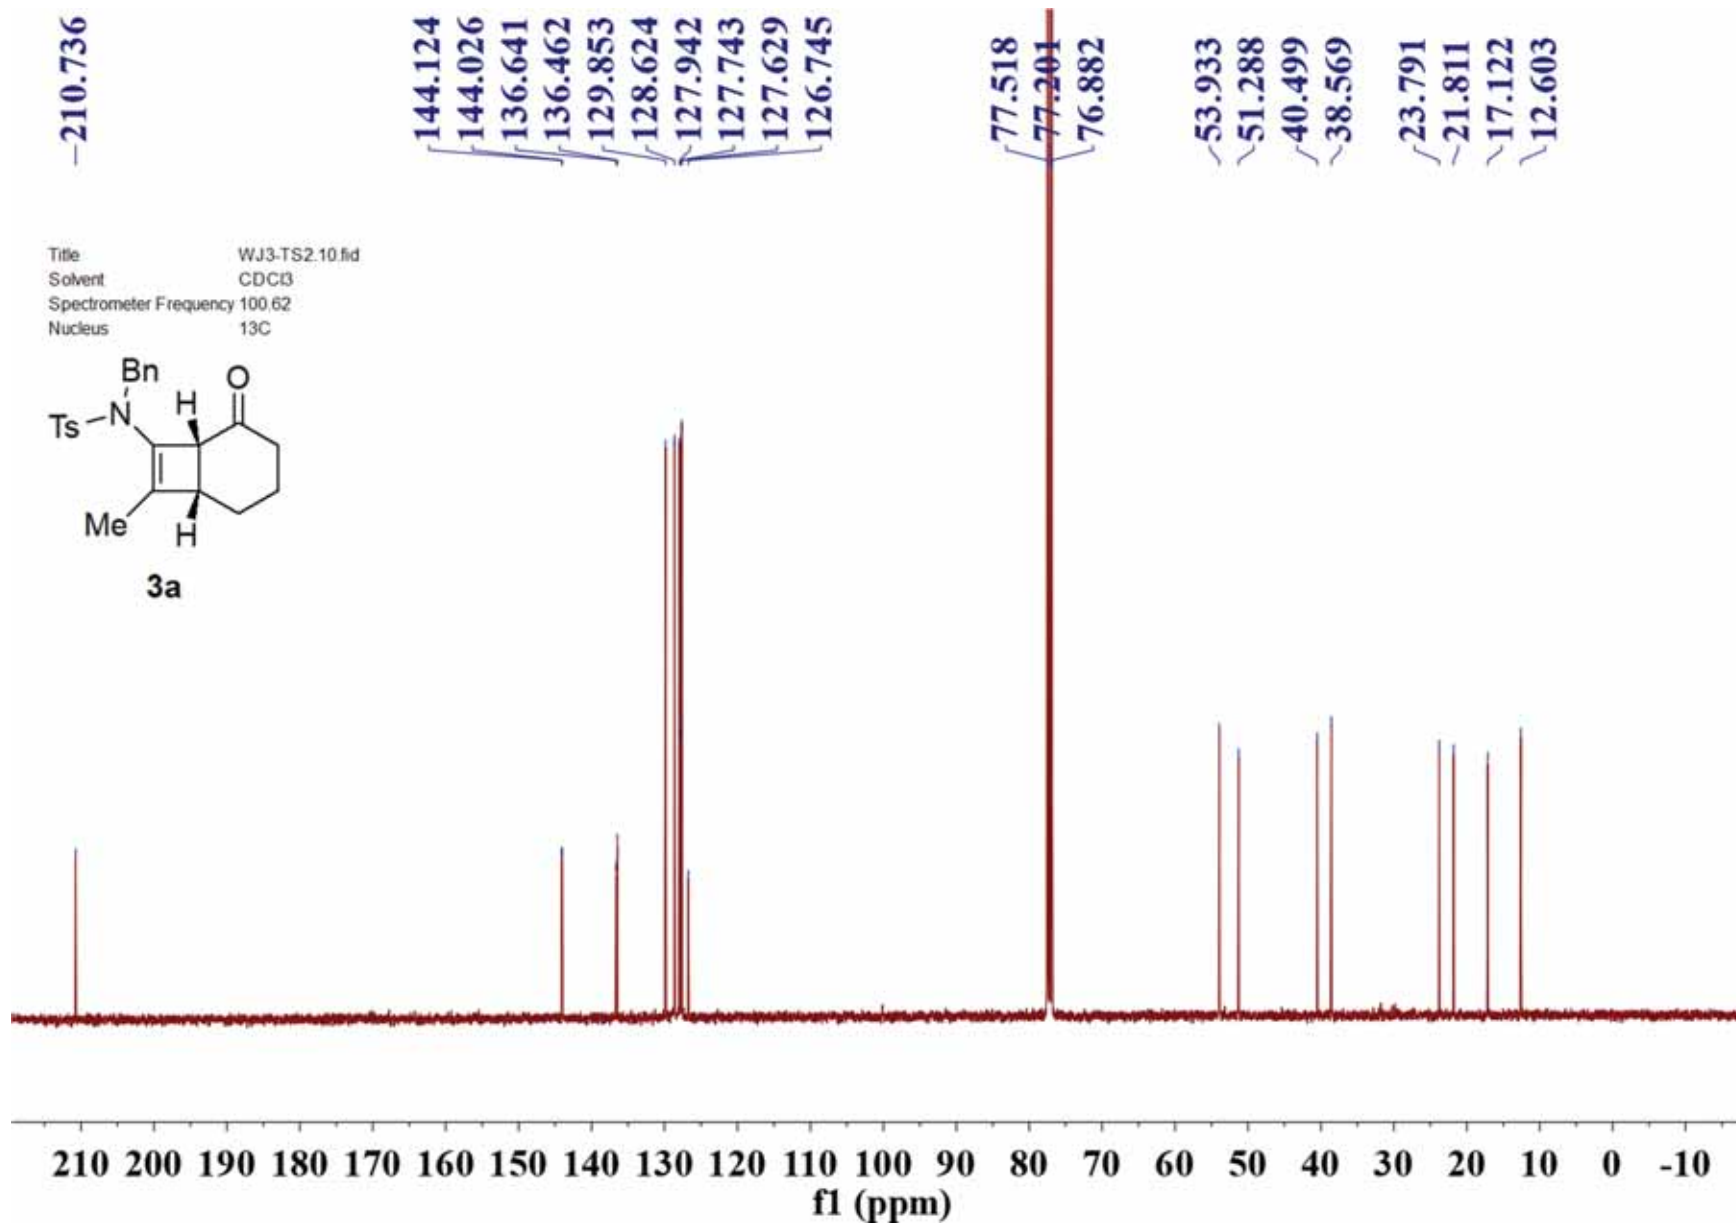

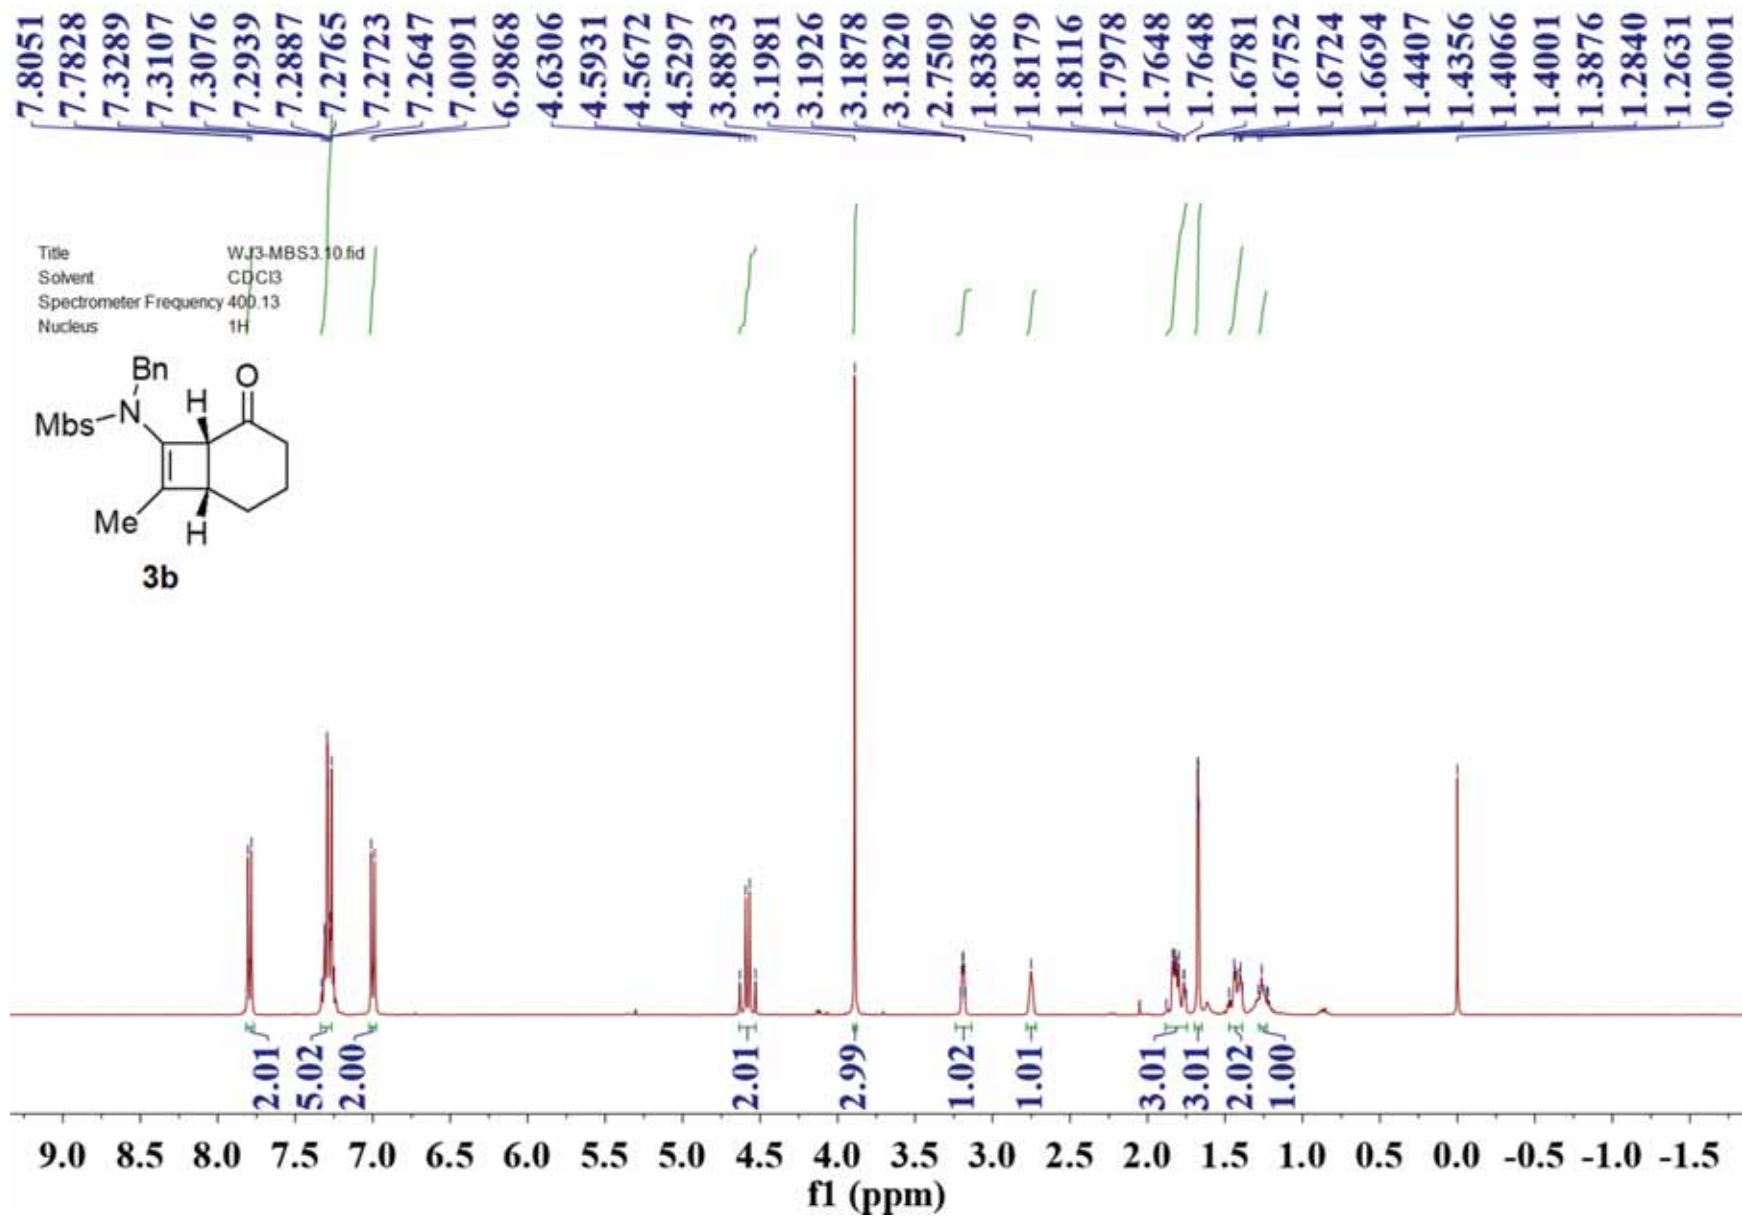

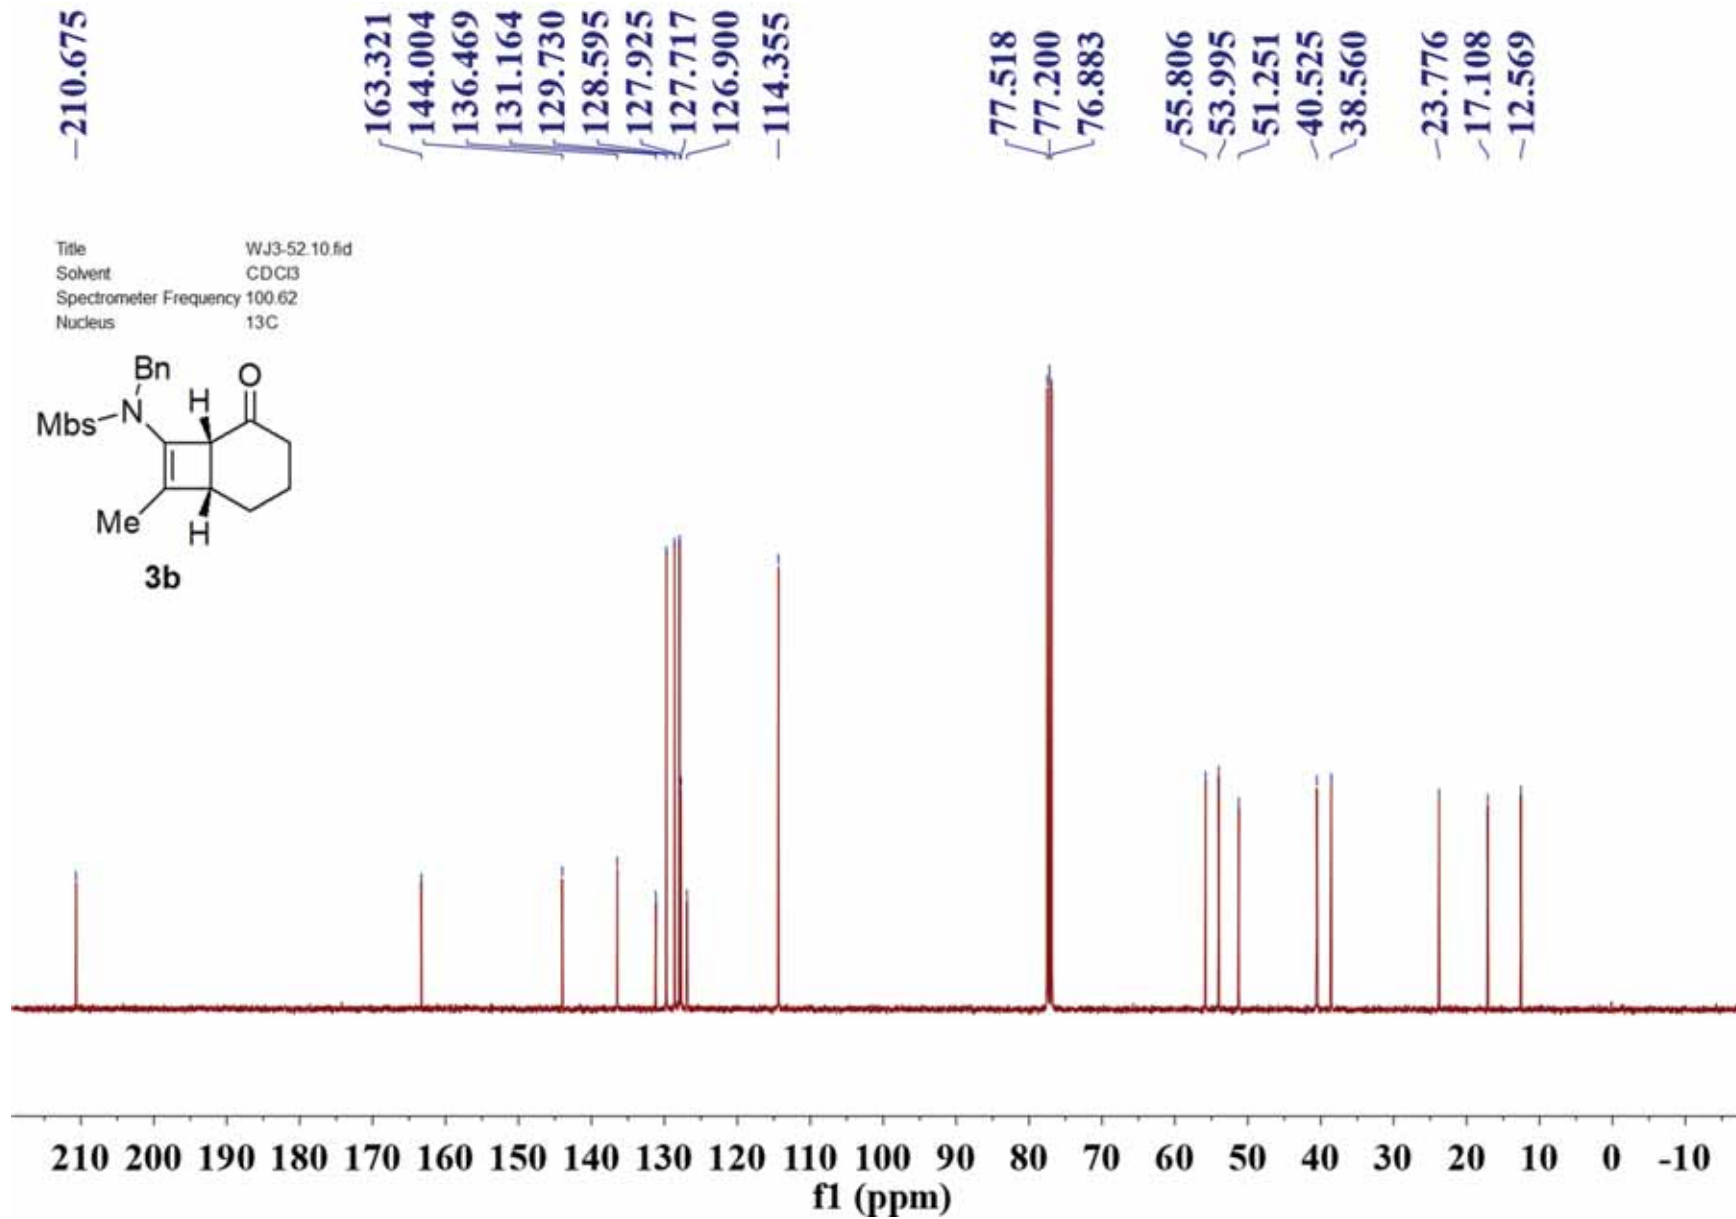

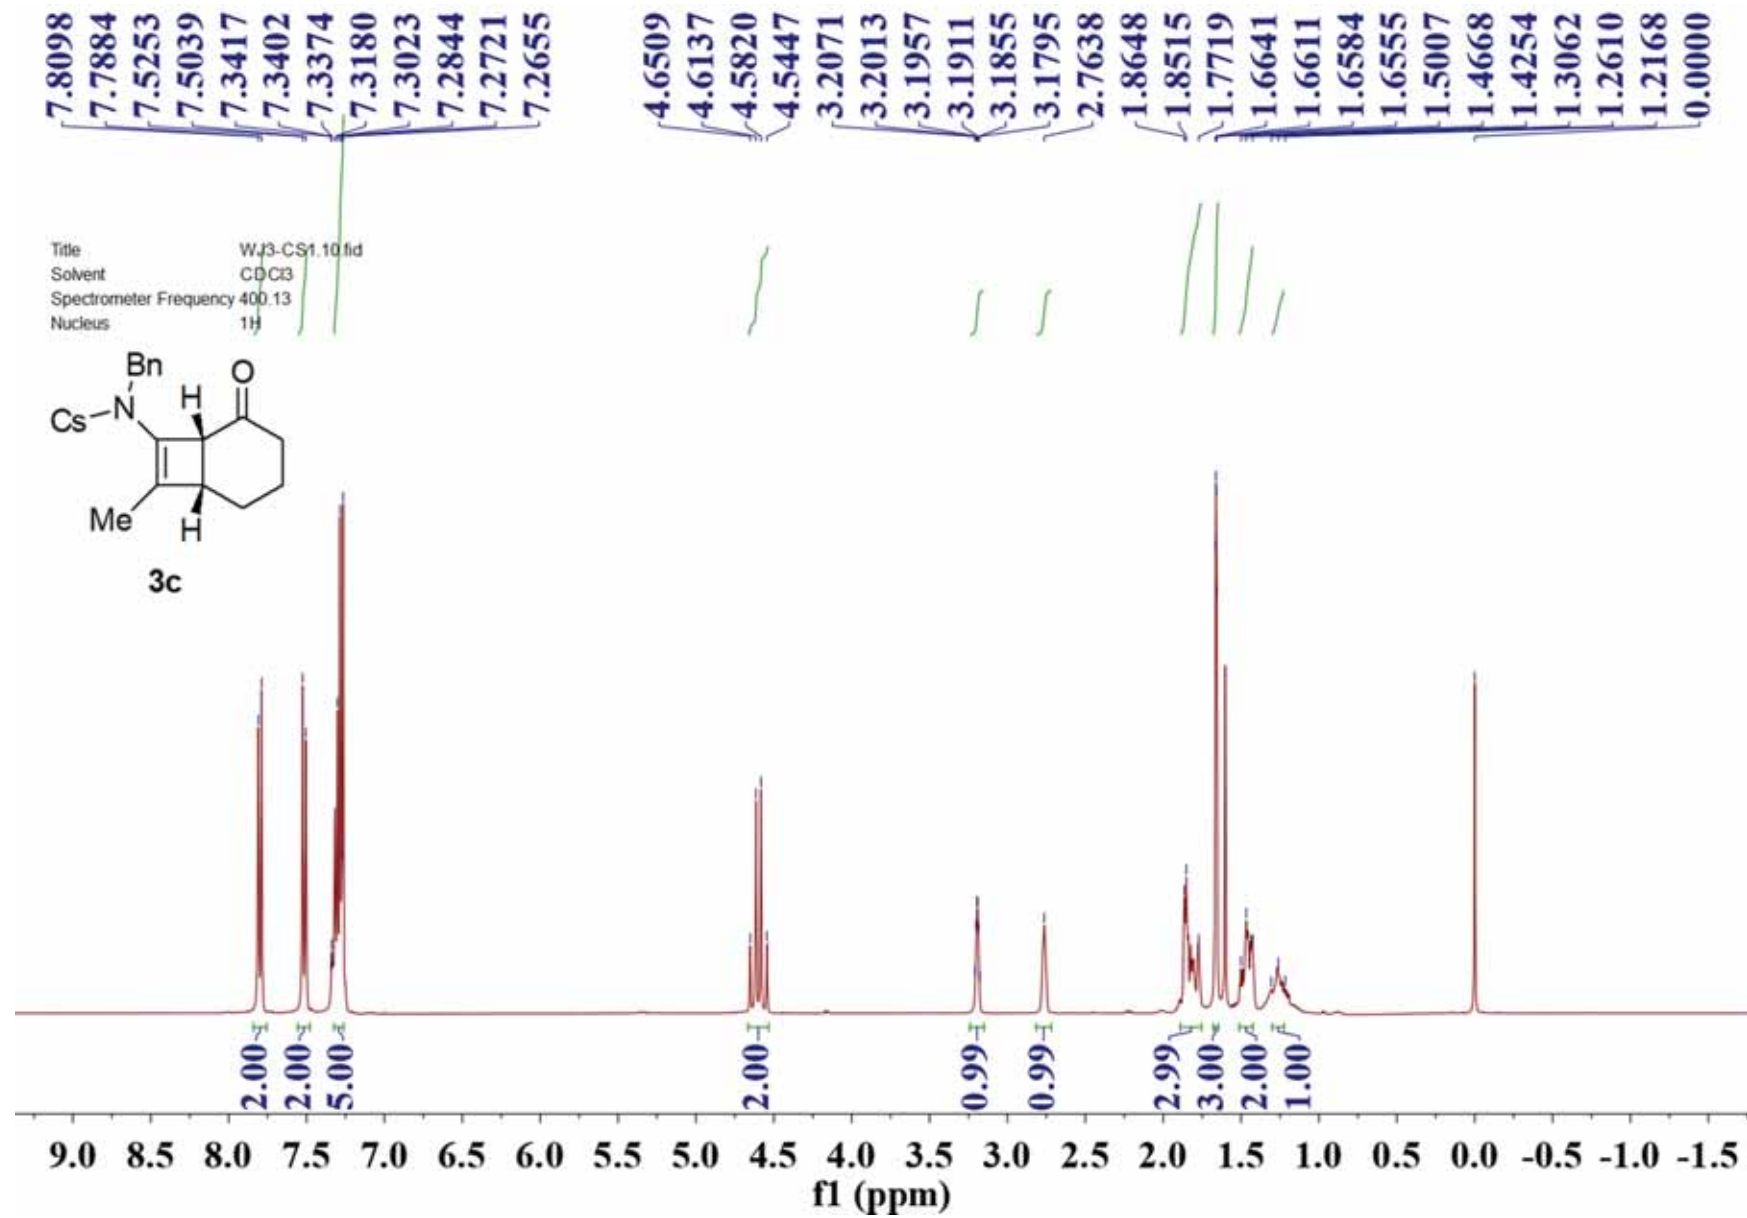

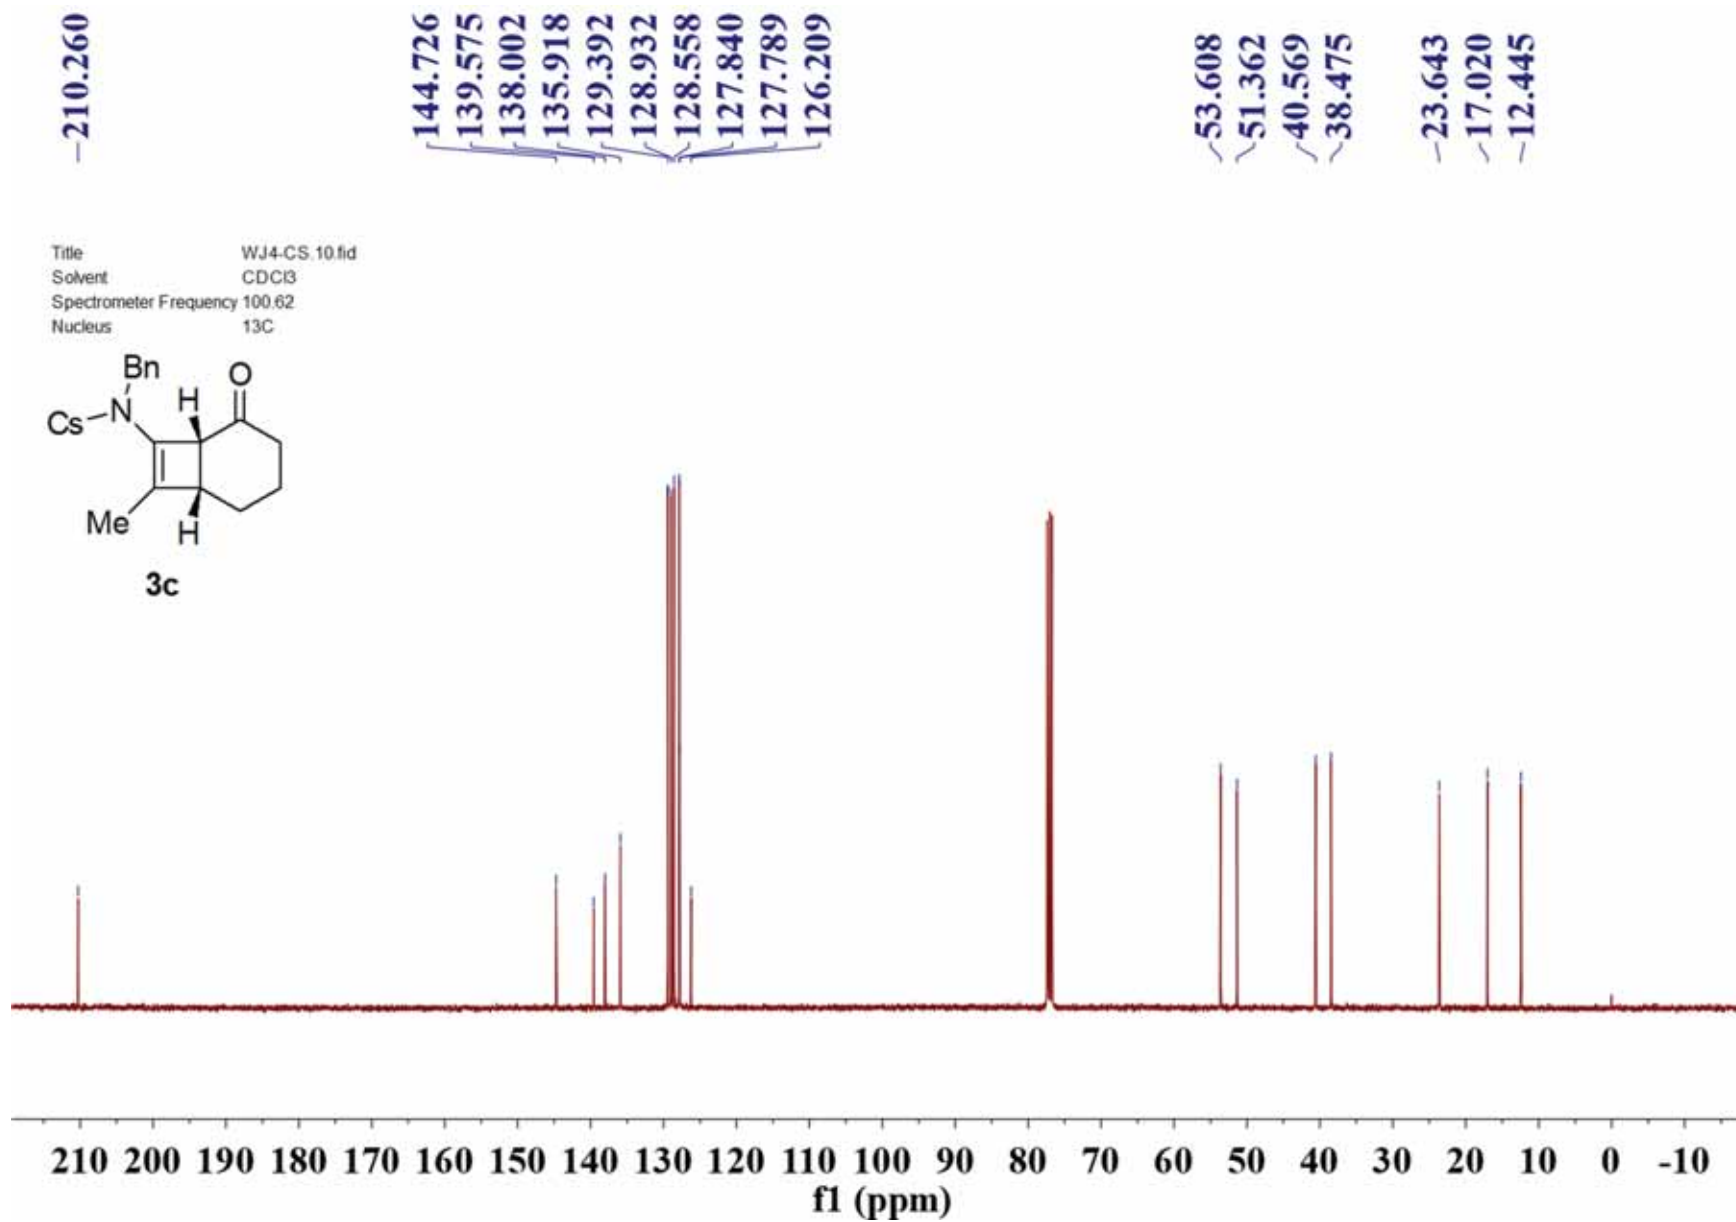

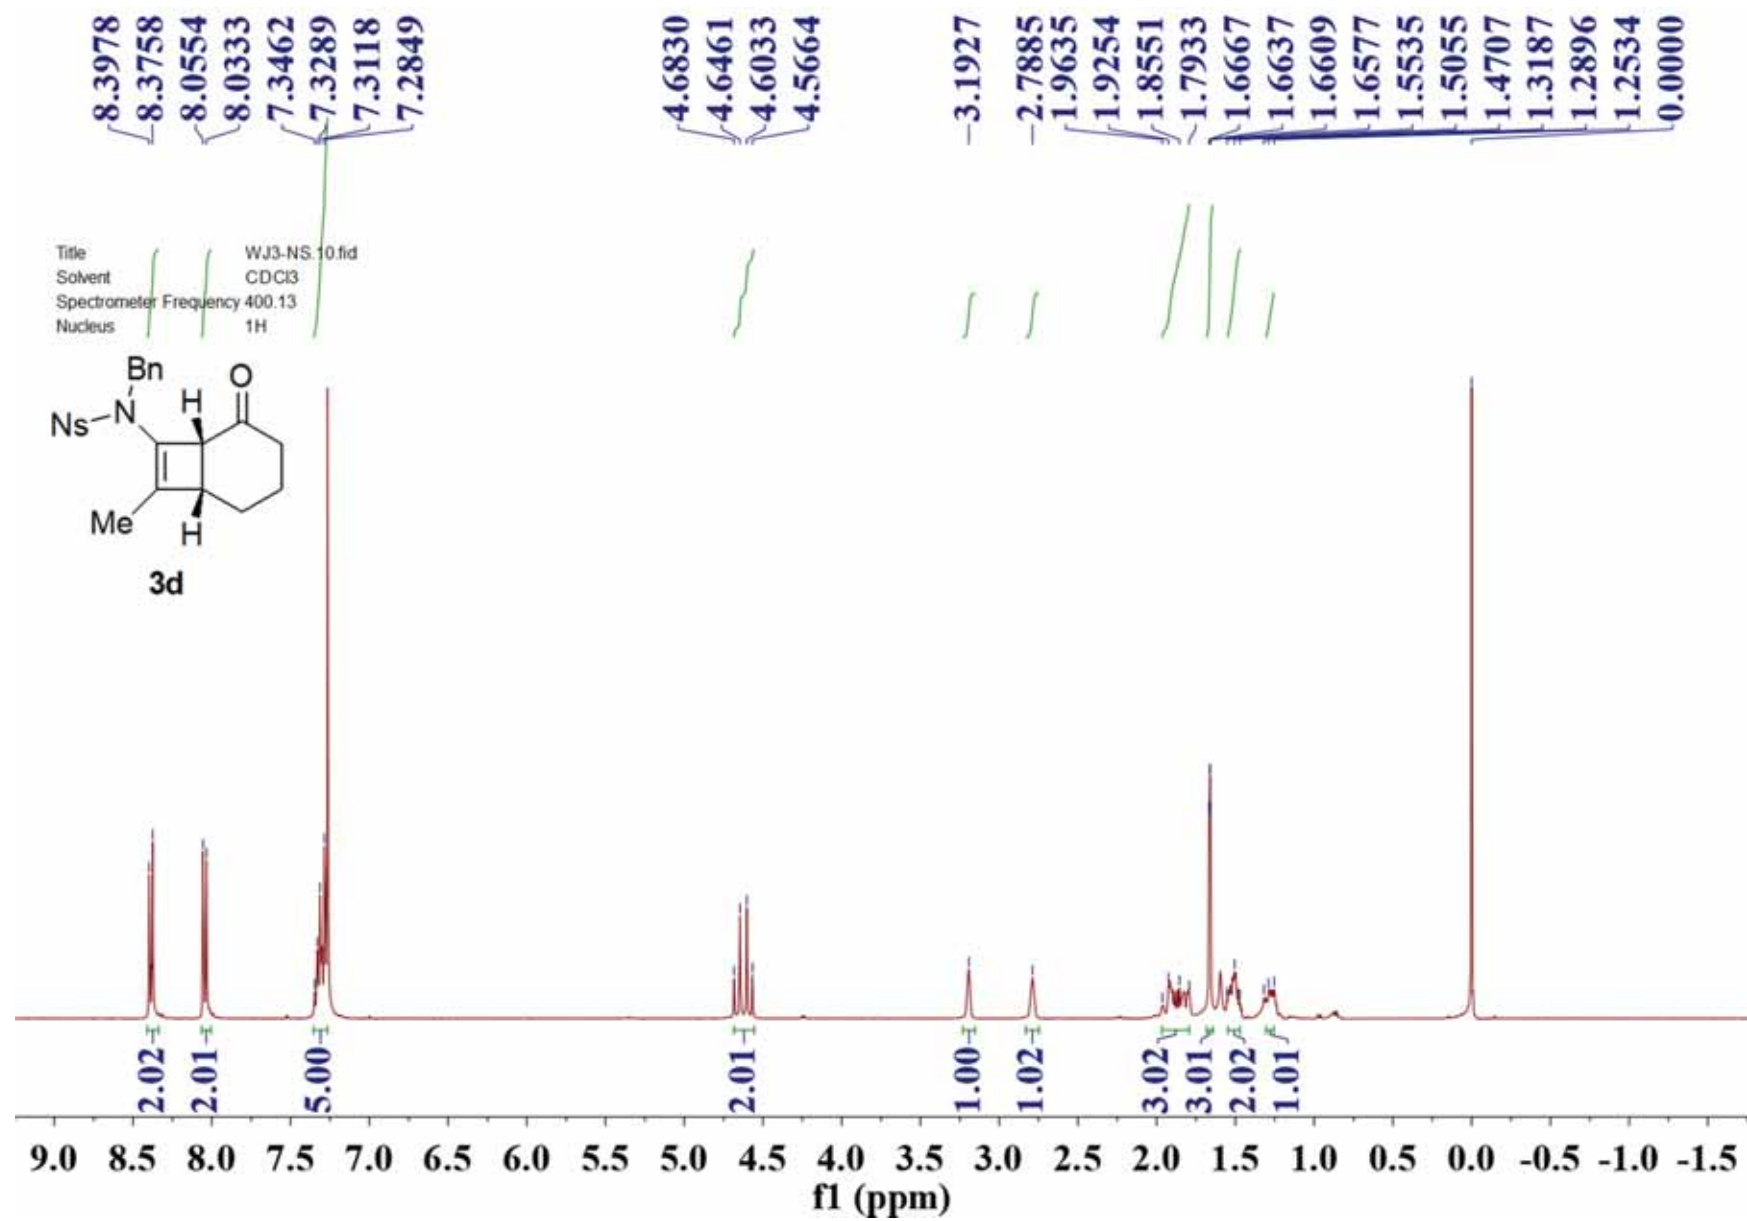

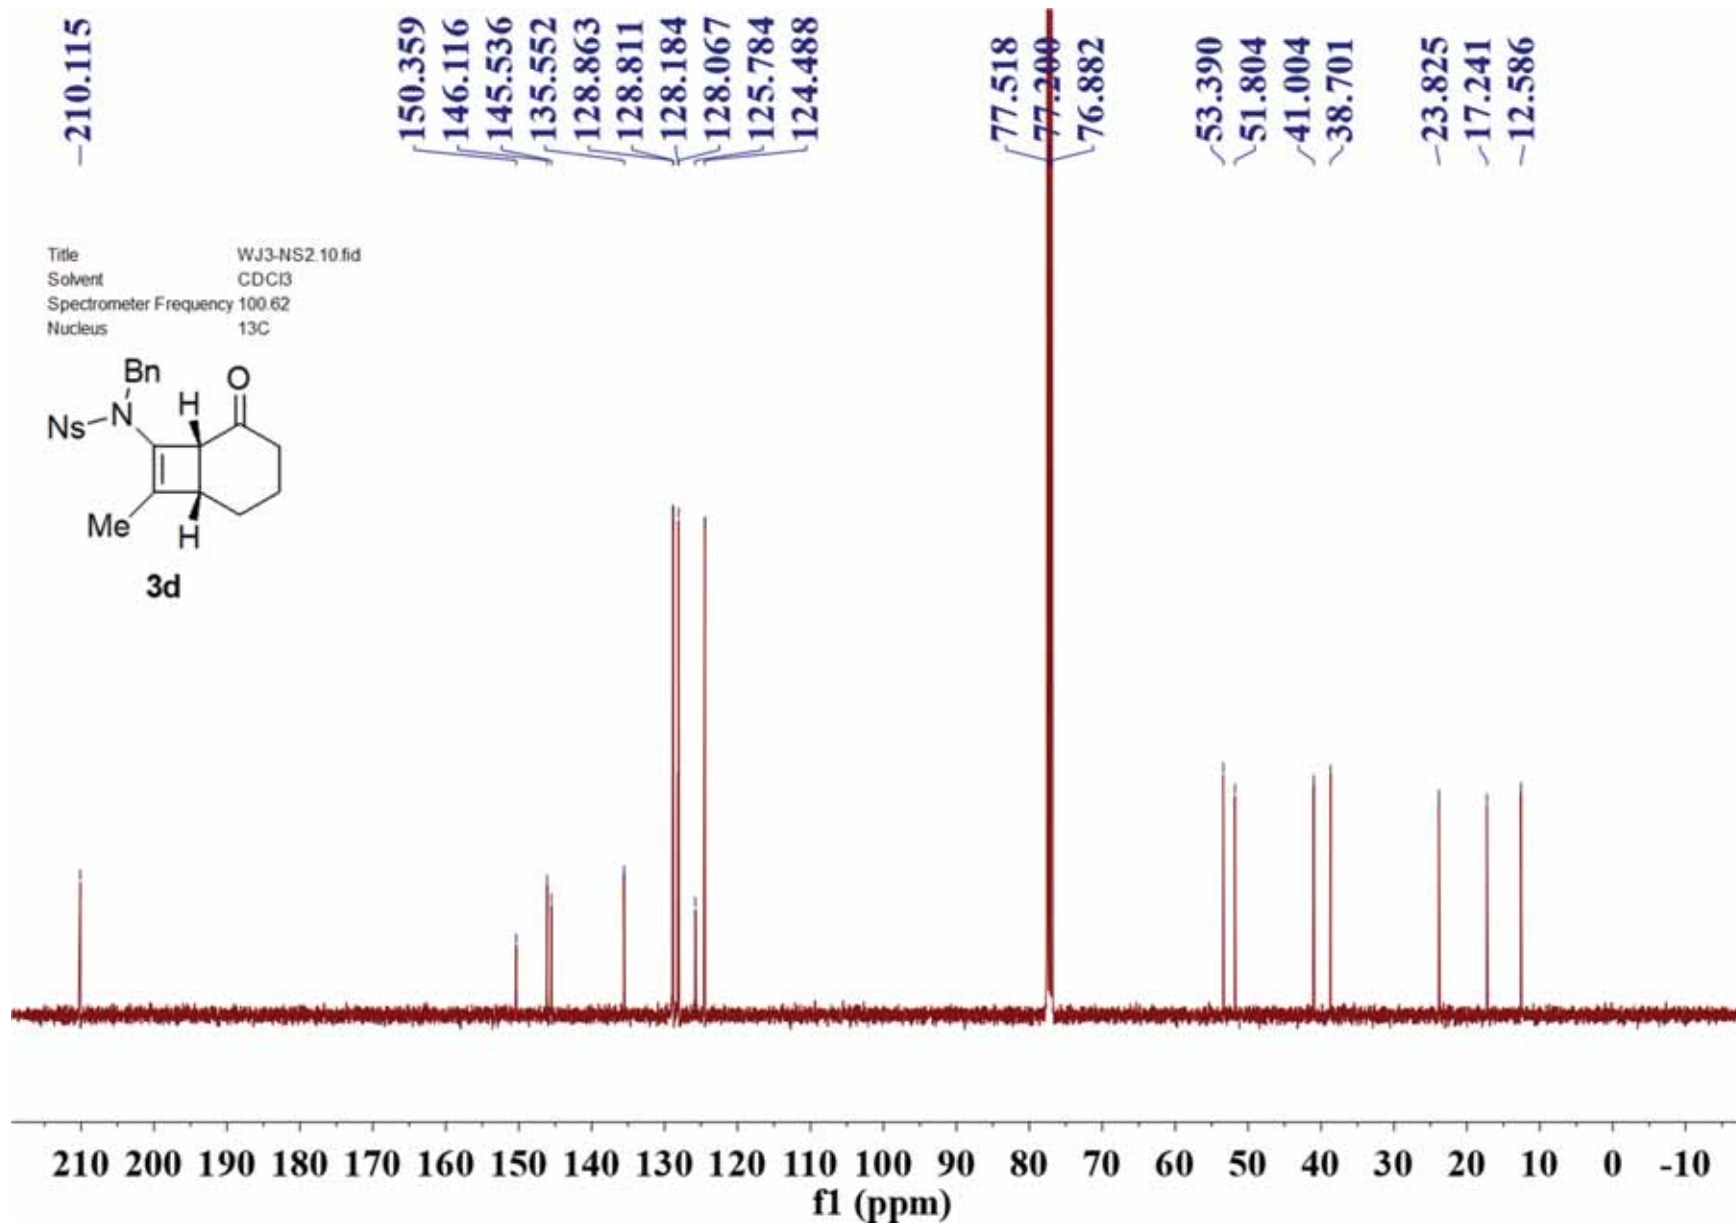



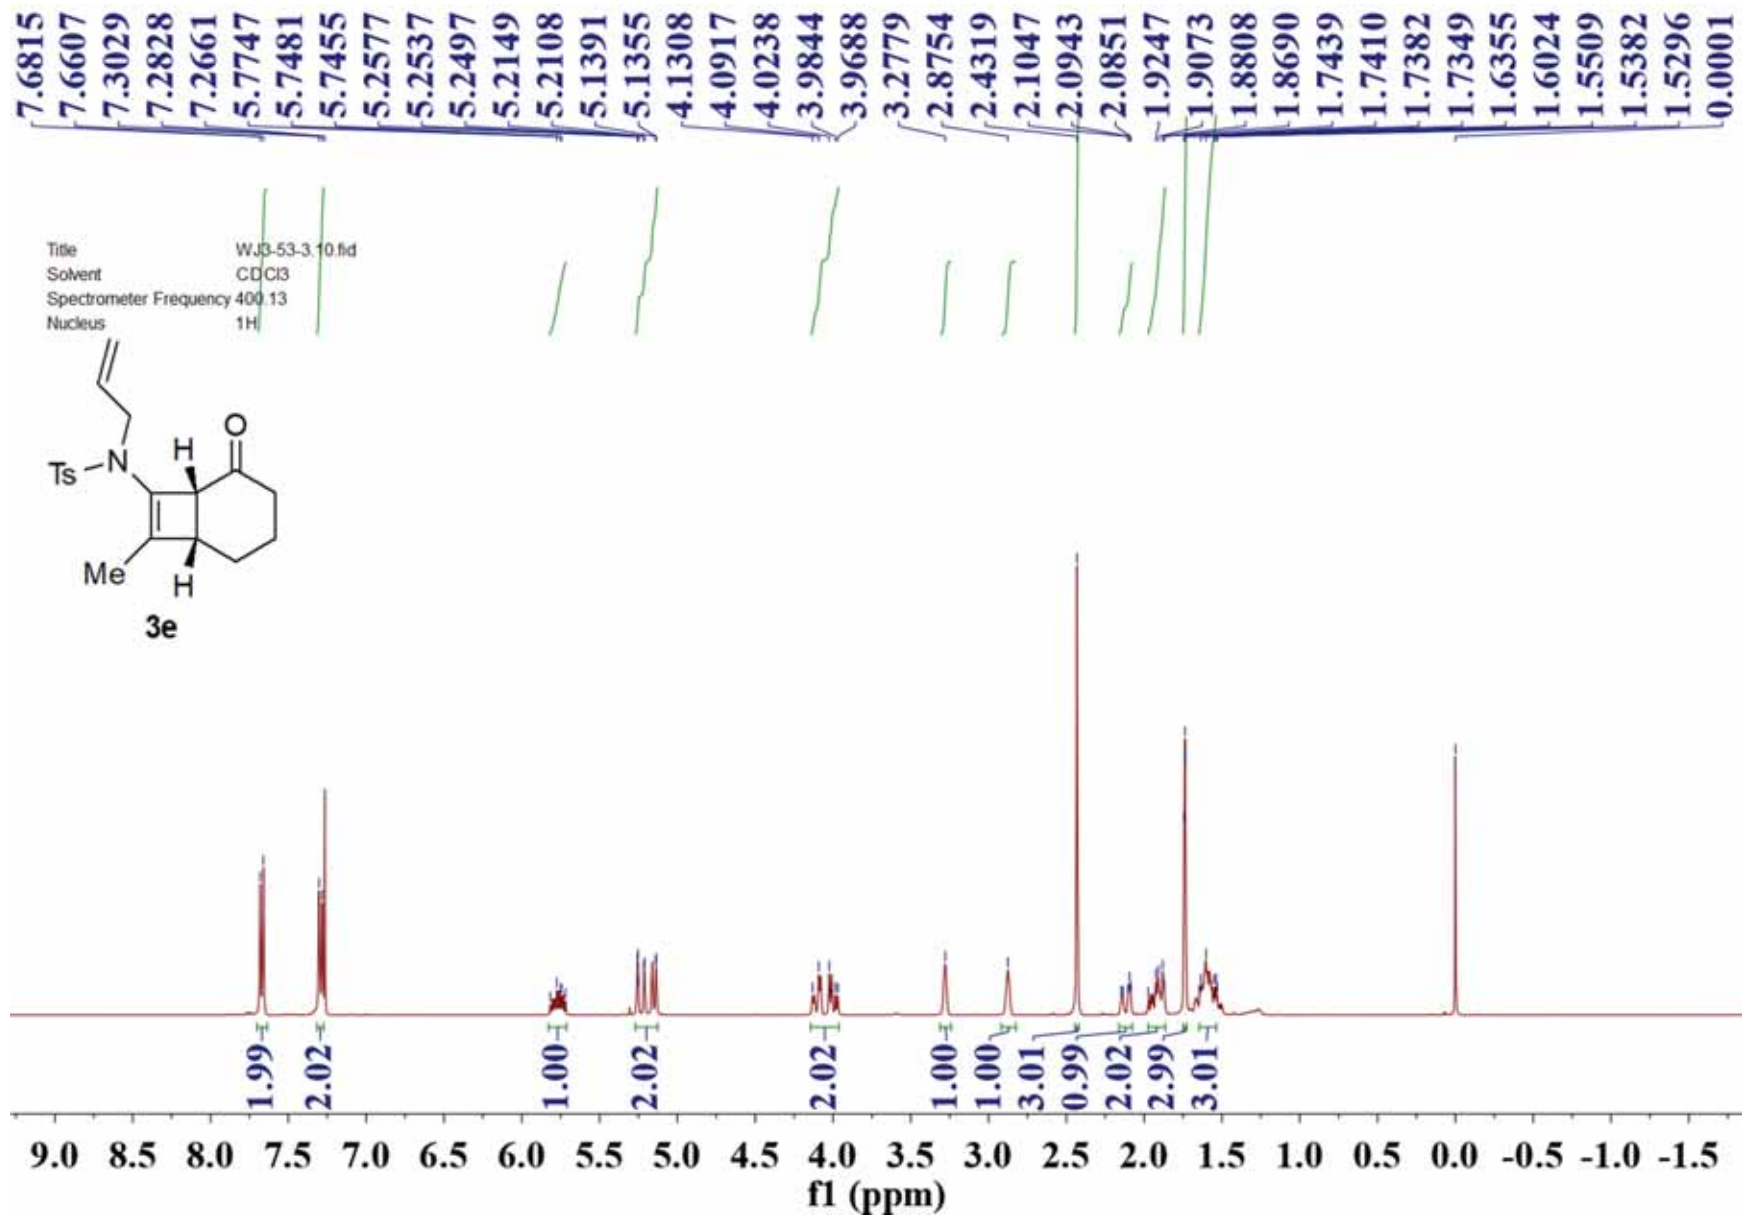

-210.544

143.927  
143.210  
136.755  
133.674  
129.752  
127.586  
126.873  
117.765

77.519  
77.202  
76.885

53.920  
50.346  
40.574  
38.604

23.882  
21.779  
17.298  
12.623

Title WJ3-YX2.10.fid  
Solvent CDCl3  
Spectrometer Frequency 100.62  
Nucleus 13C

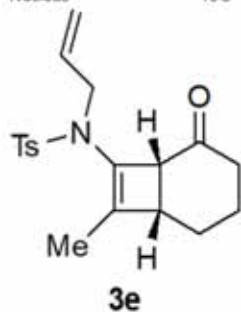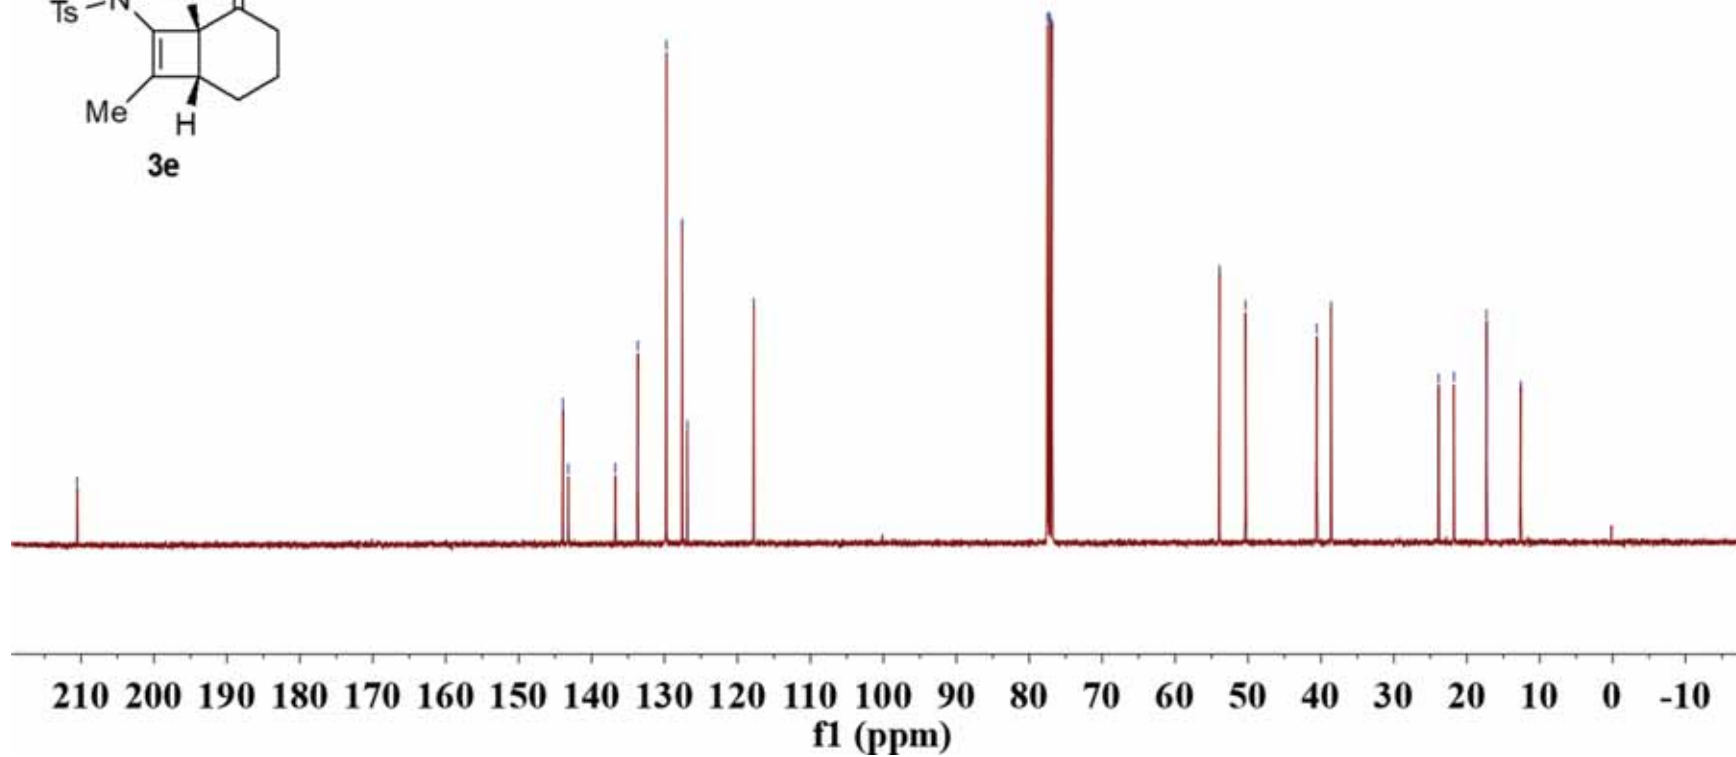

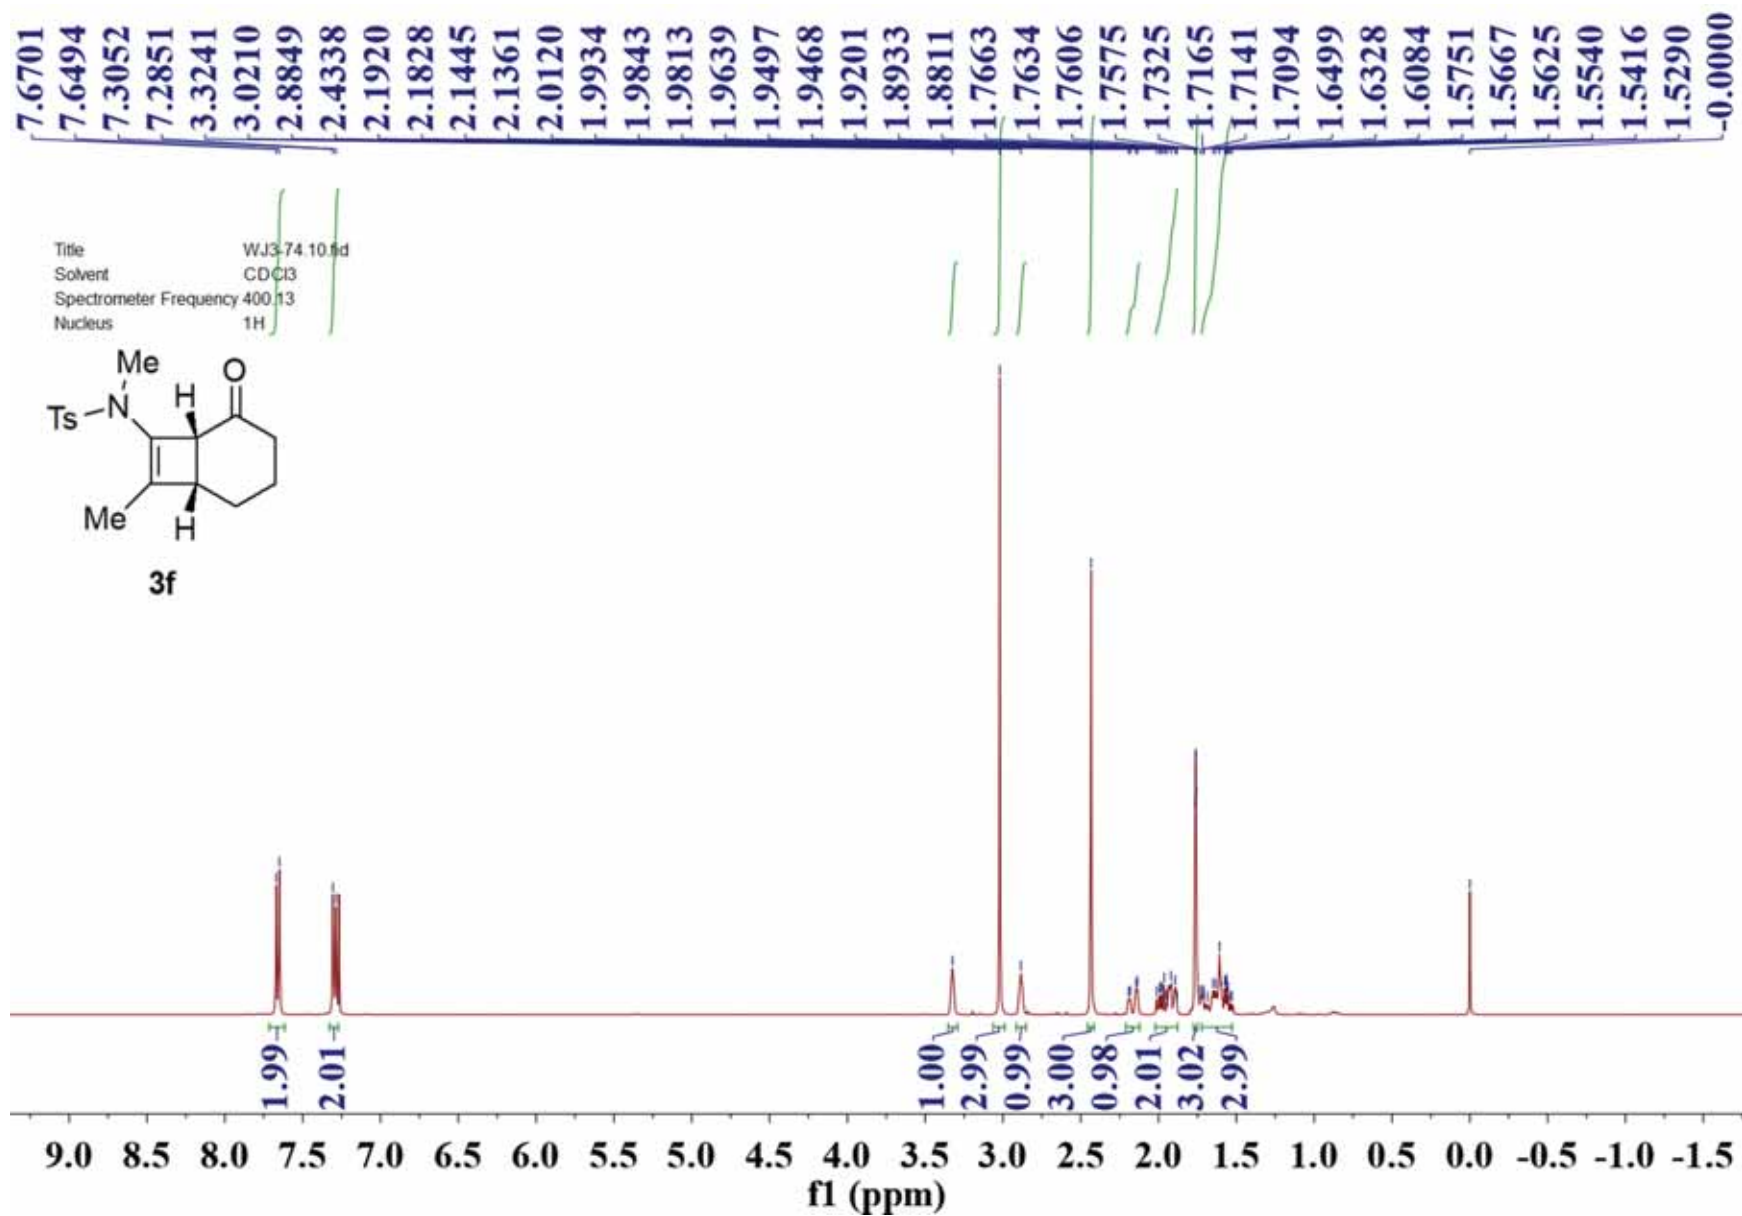

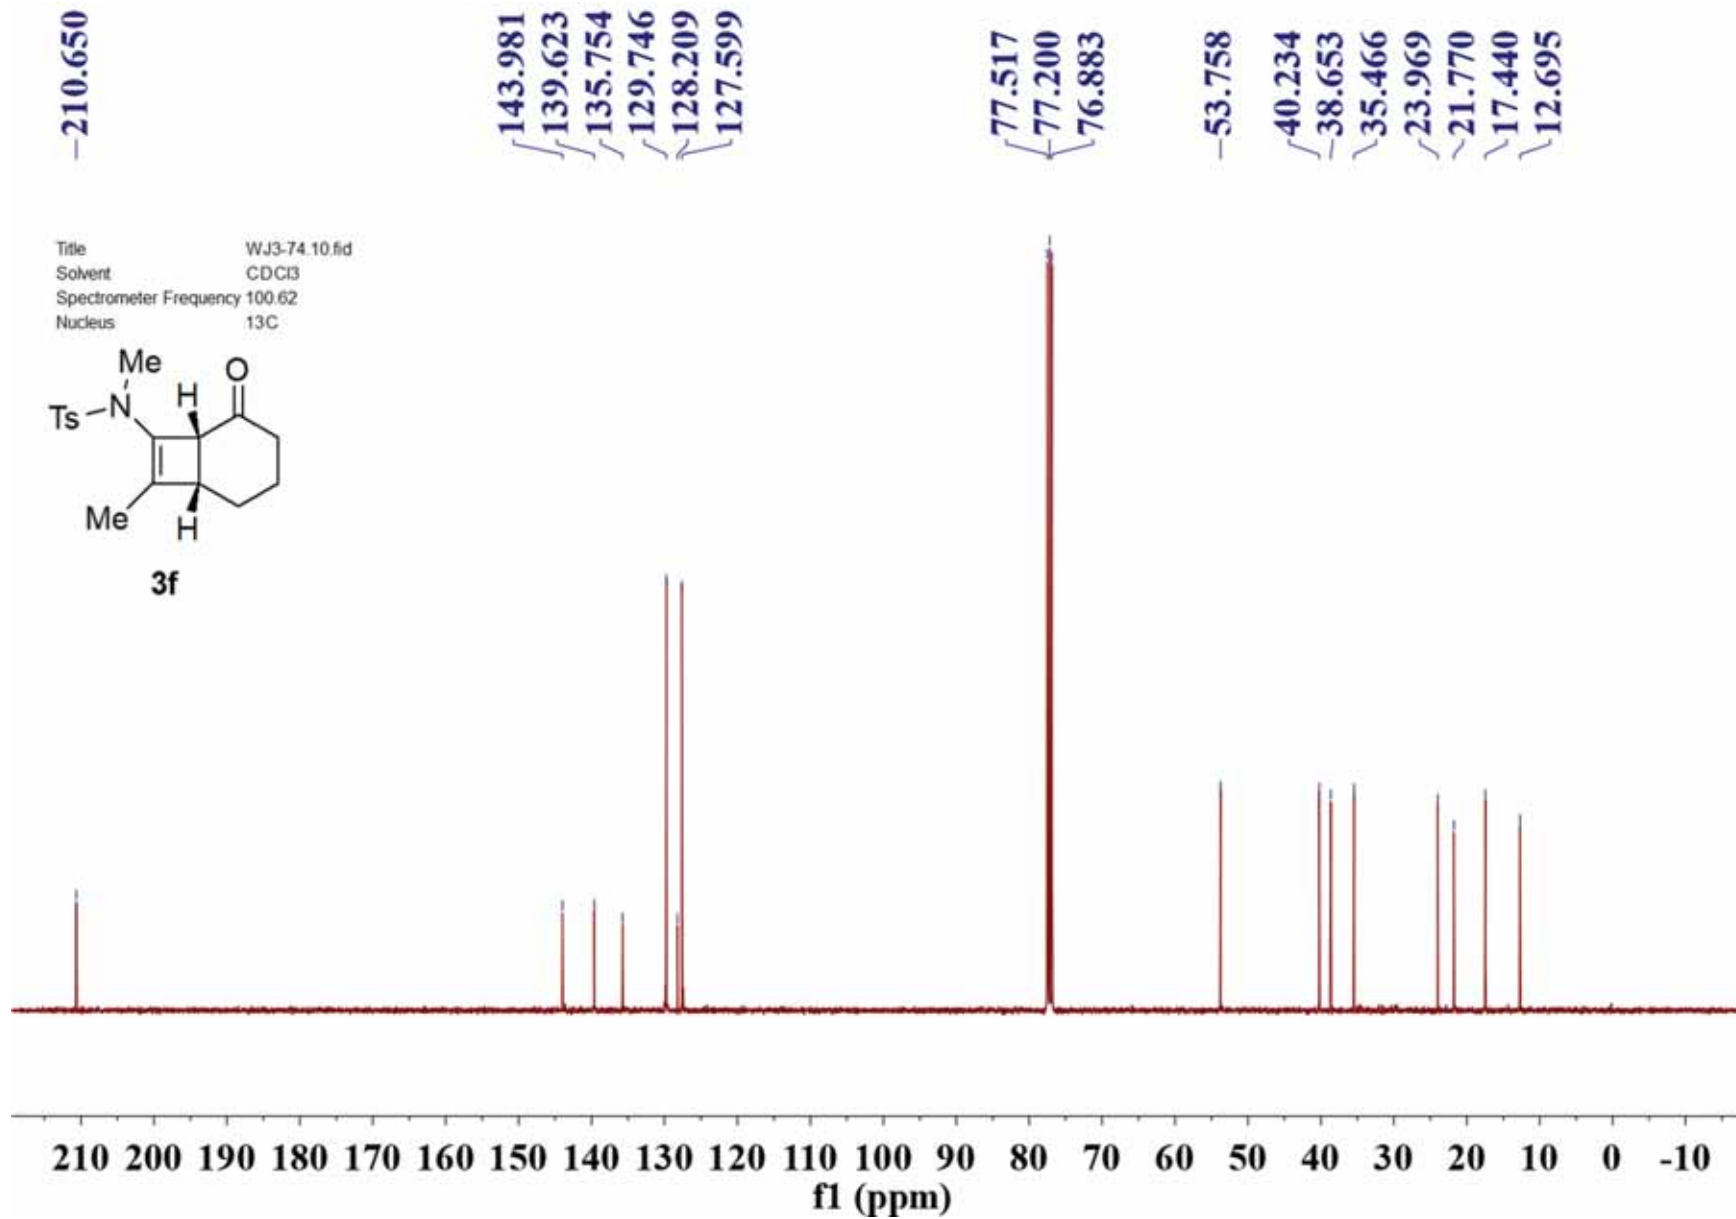

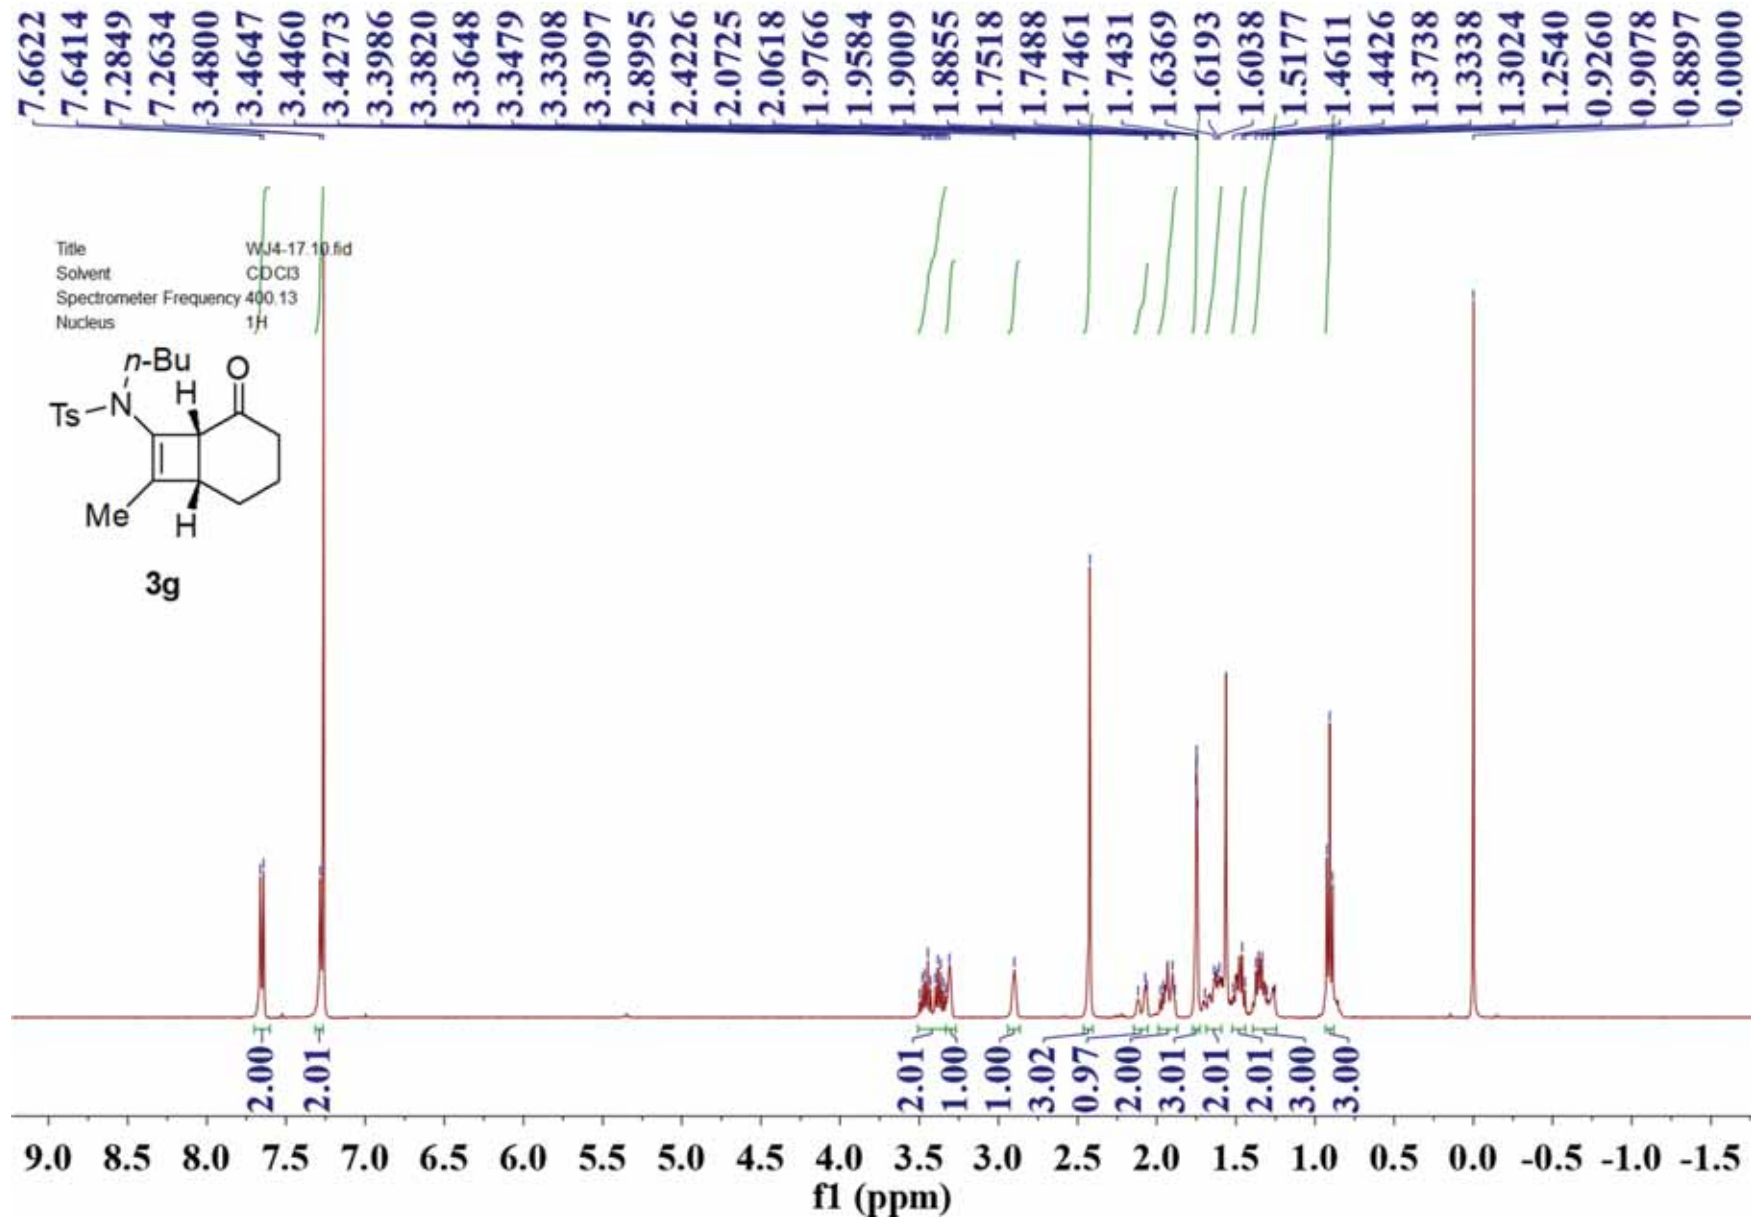

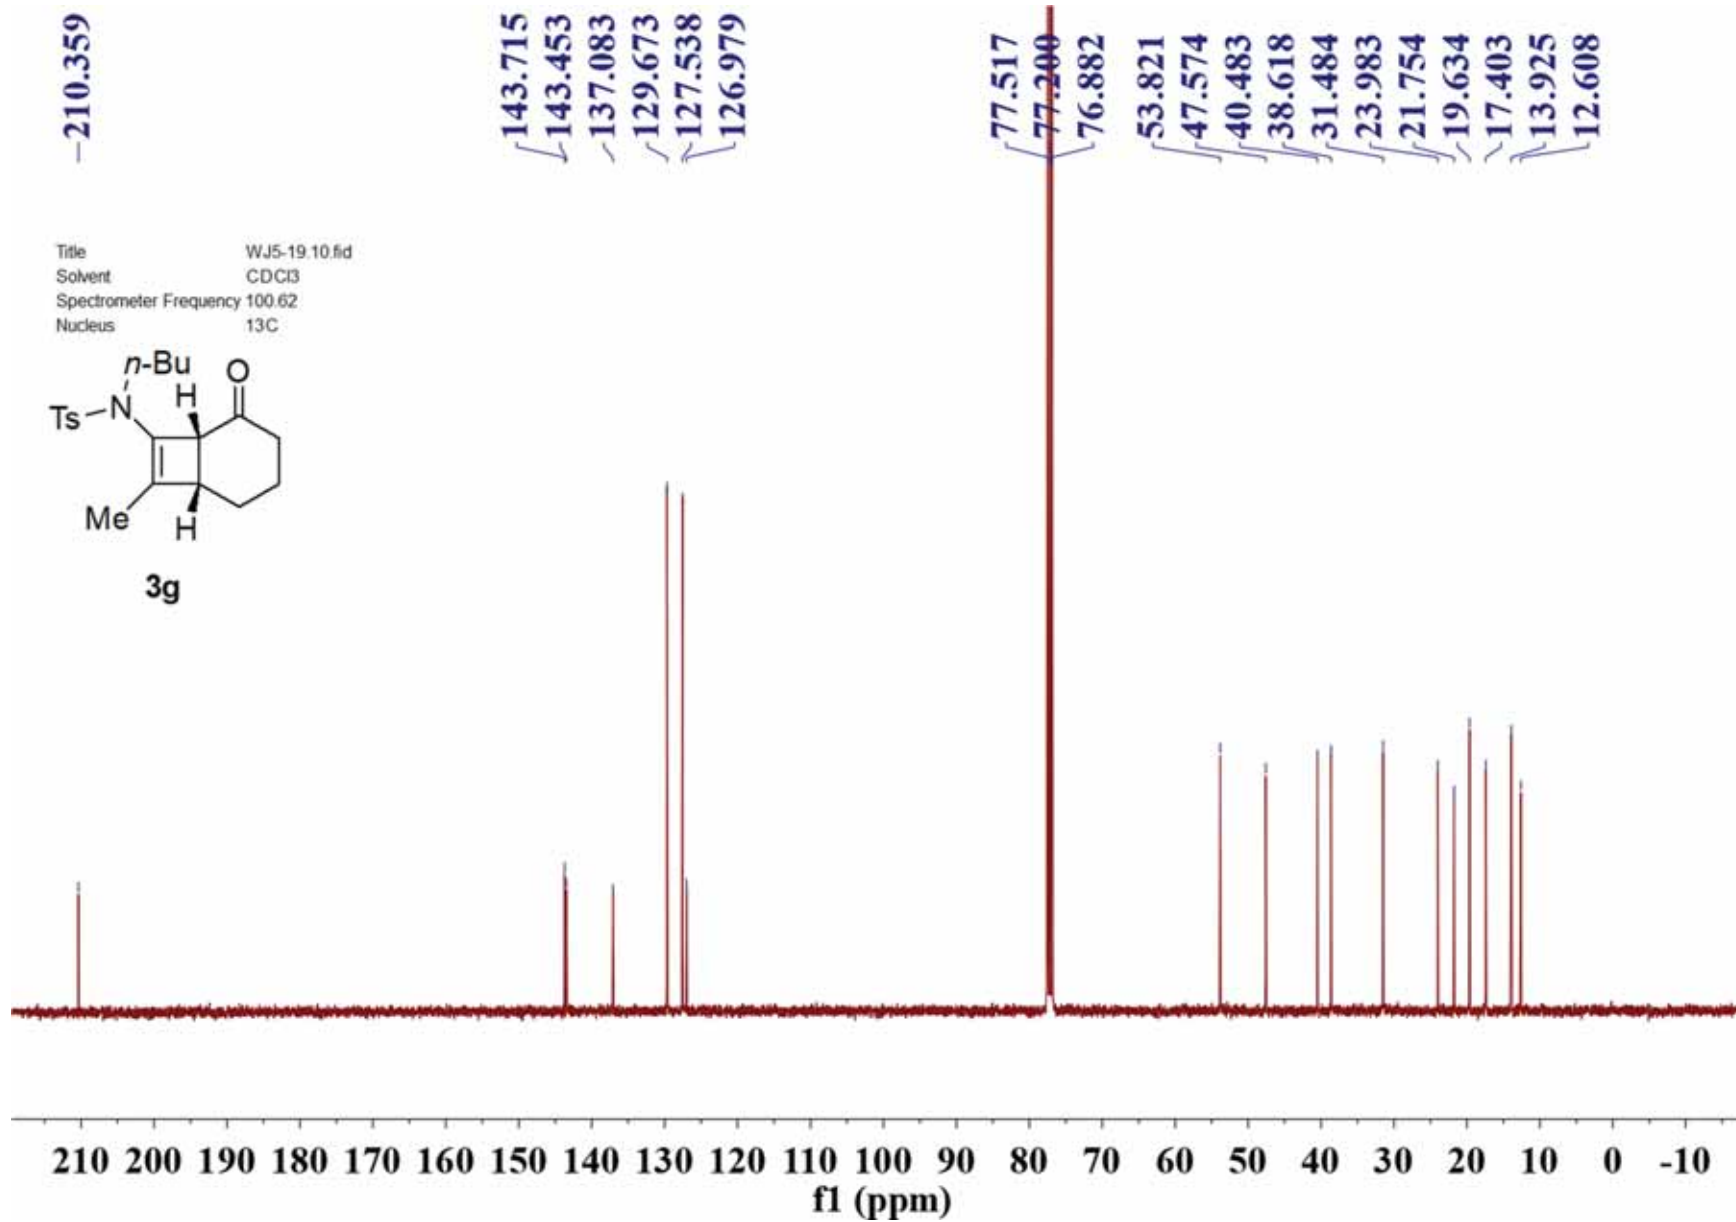

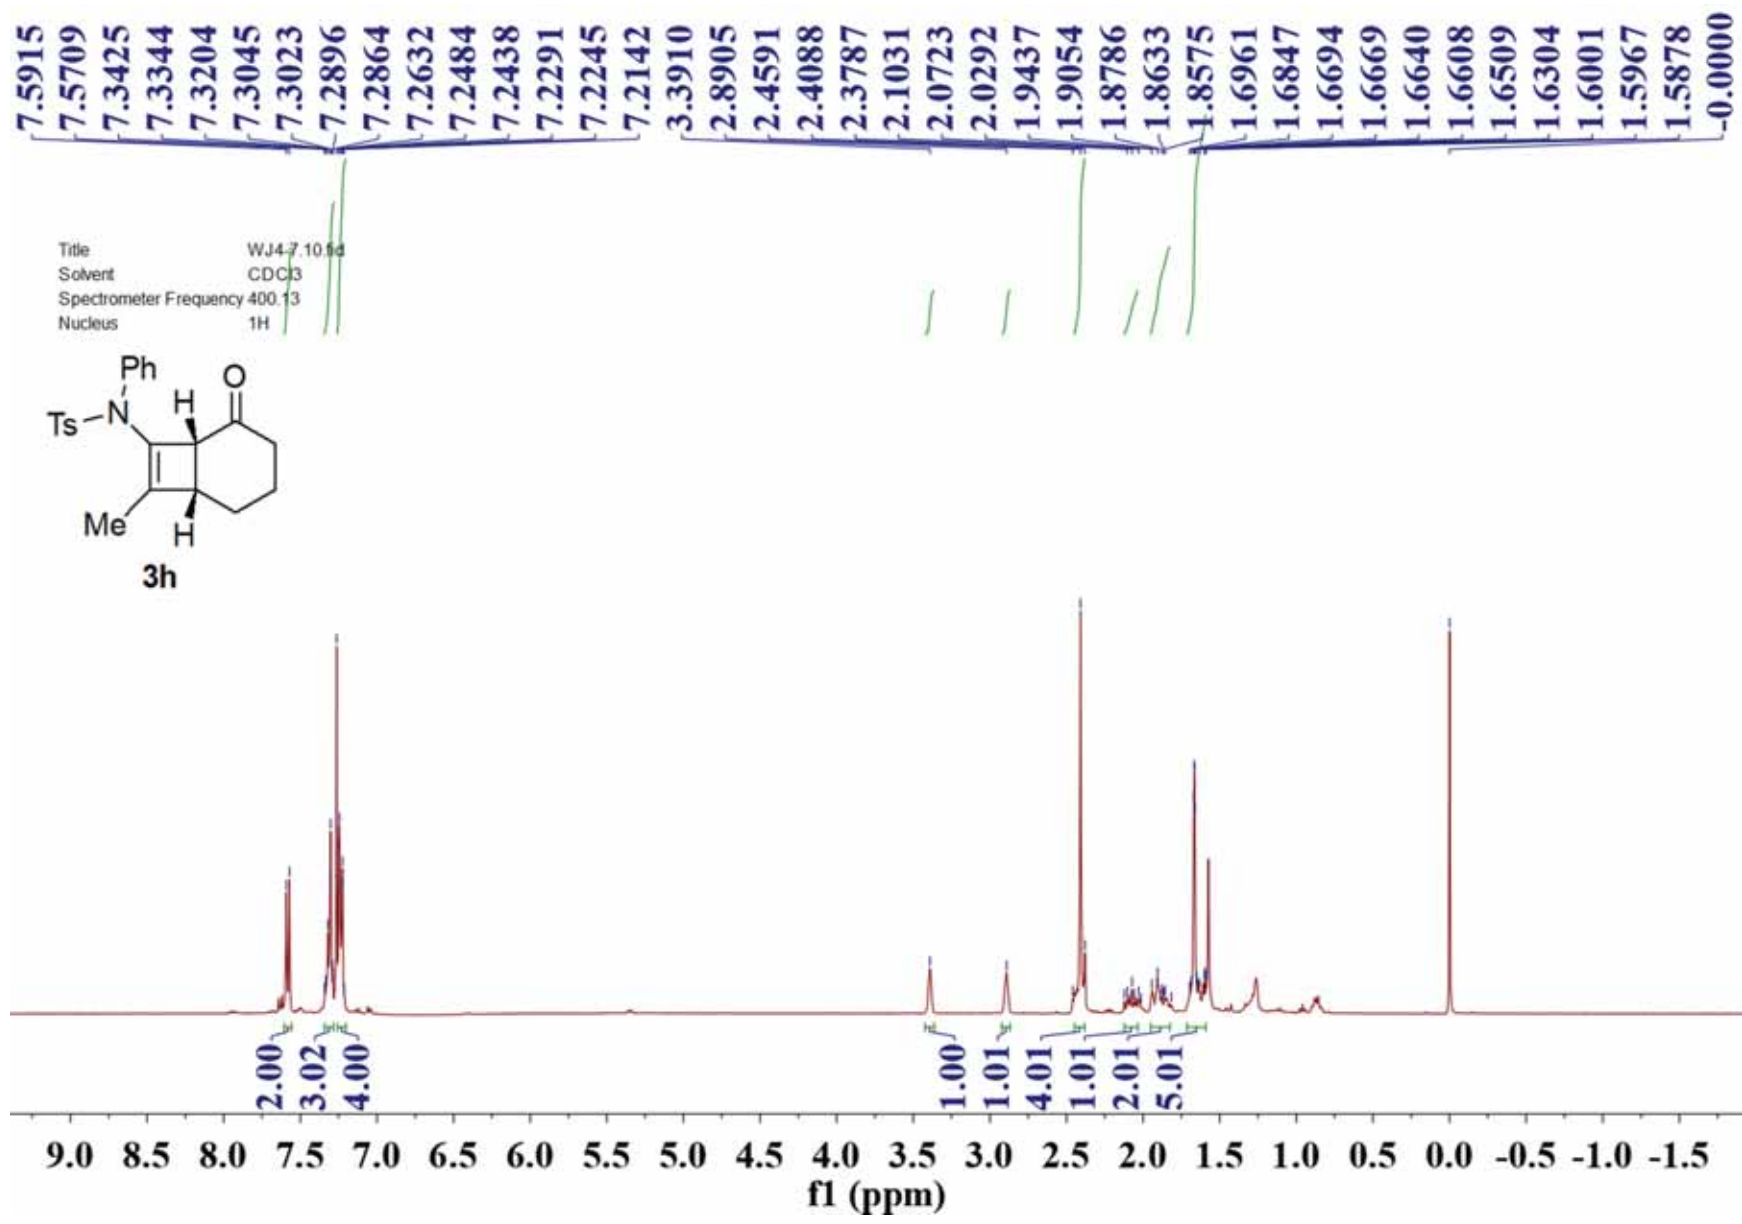

-210.939

143.957  
142.875  
138.351  
136.780  
129.651  
129.541  
129.409  
129.022  
128.399  
128.146

77.519  
77.201  
76.884

-55.542

40.060  
39.345

24.076  
21.779  
17.705  
12.195

Title WJ4-7-3.10.fid  
Solvent CDCl3  
Spectrometer Frequency 100.62  
Nucleus 13C

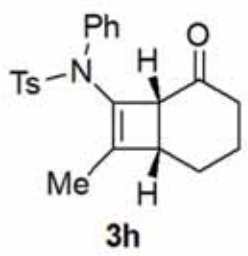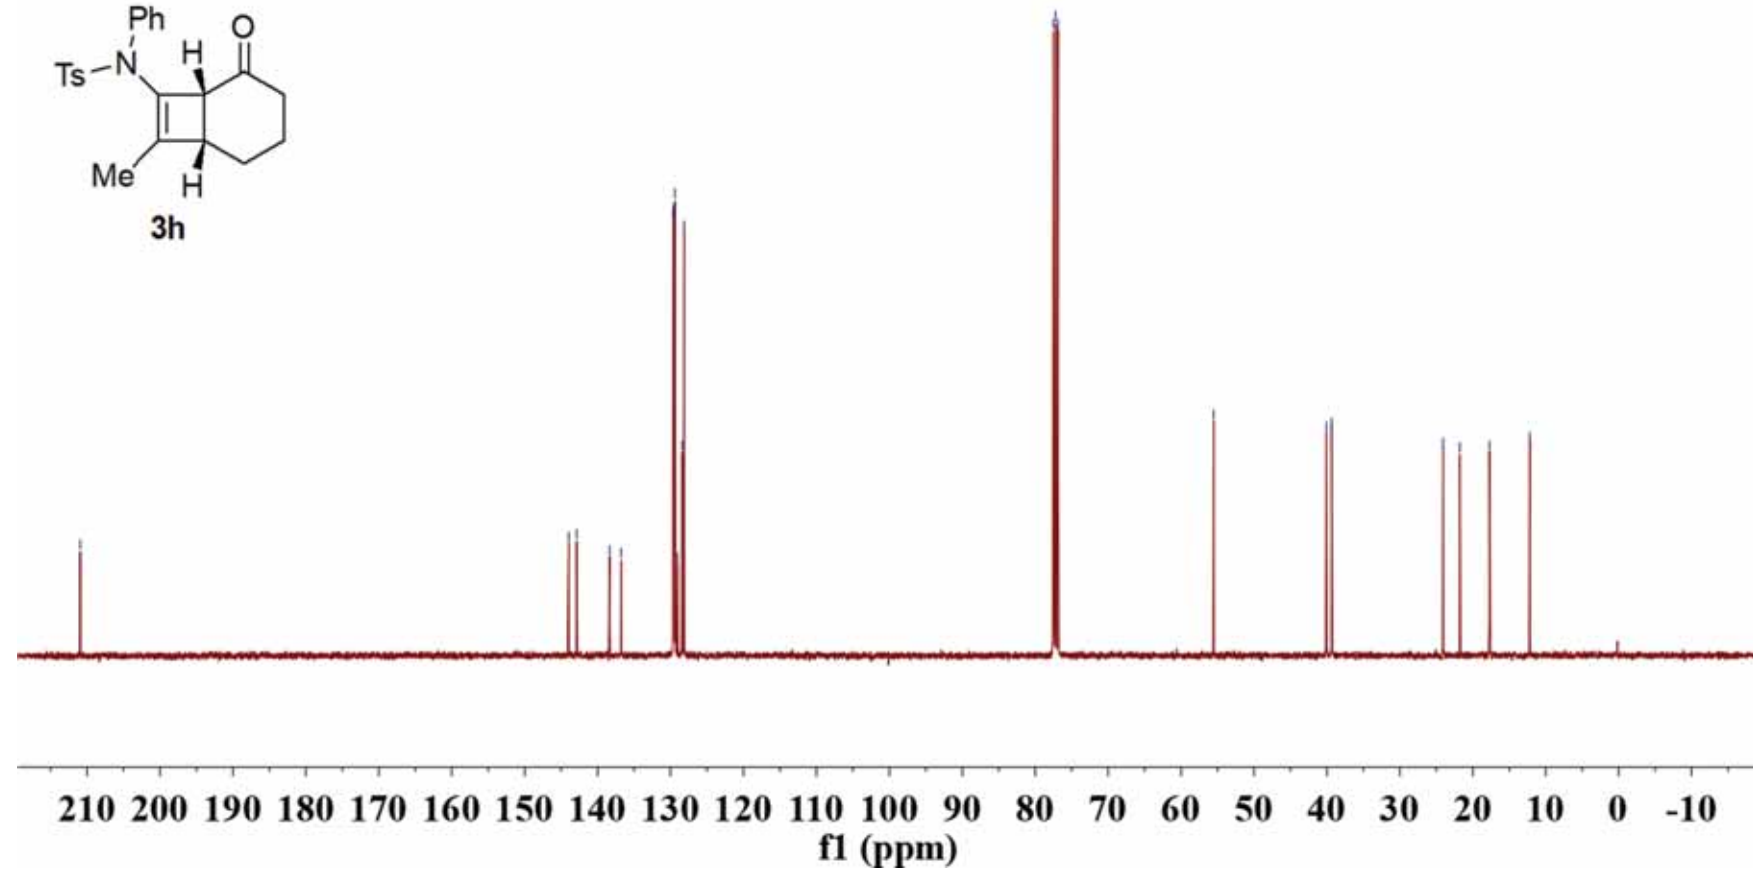



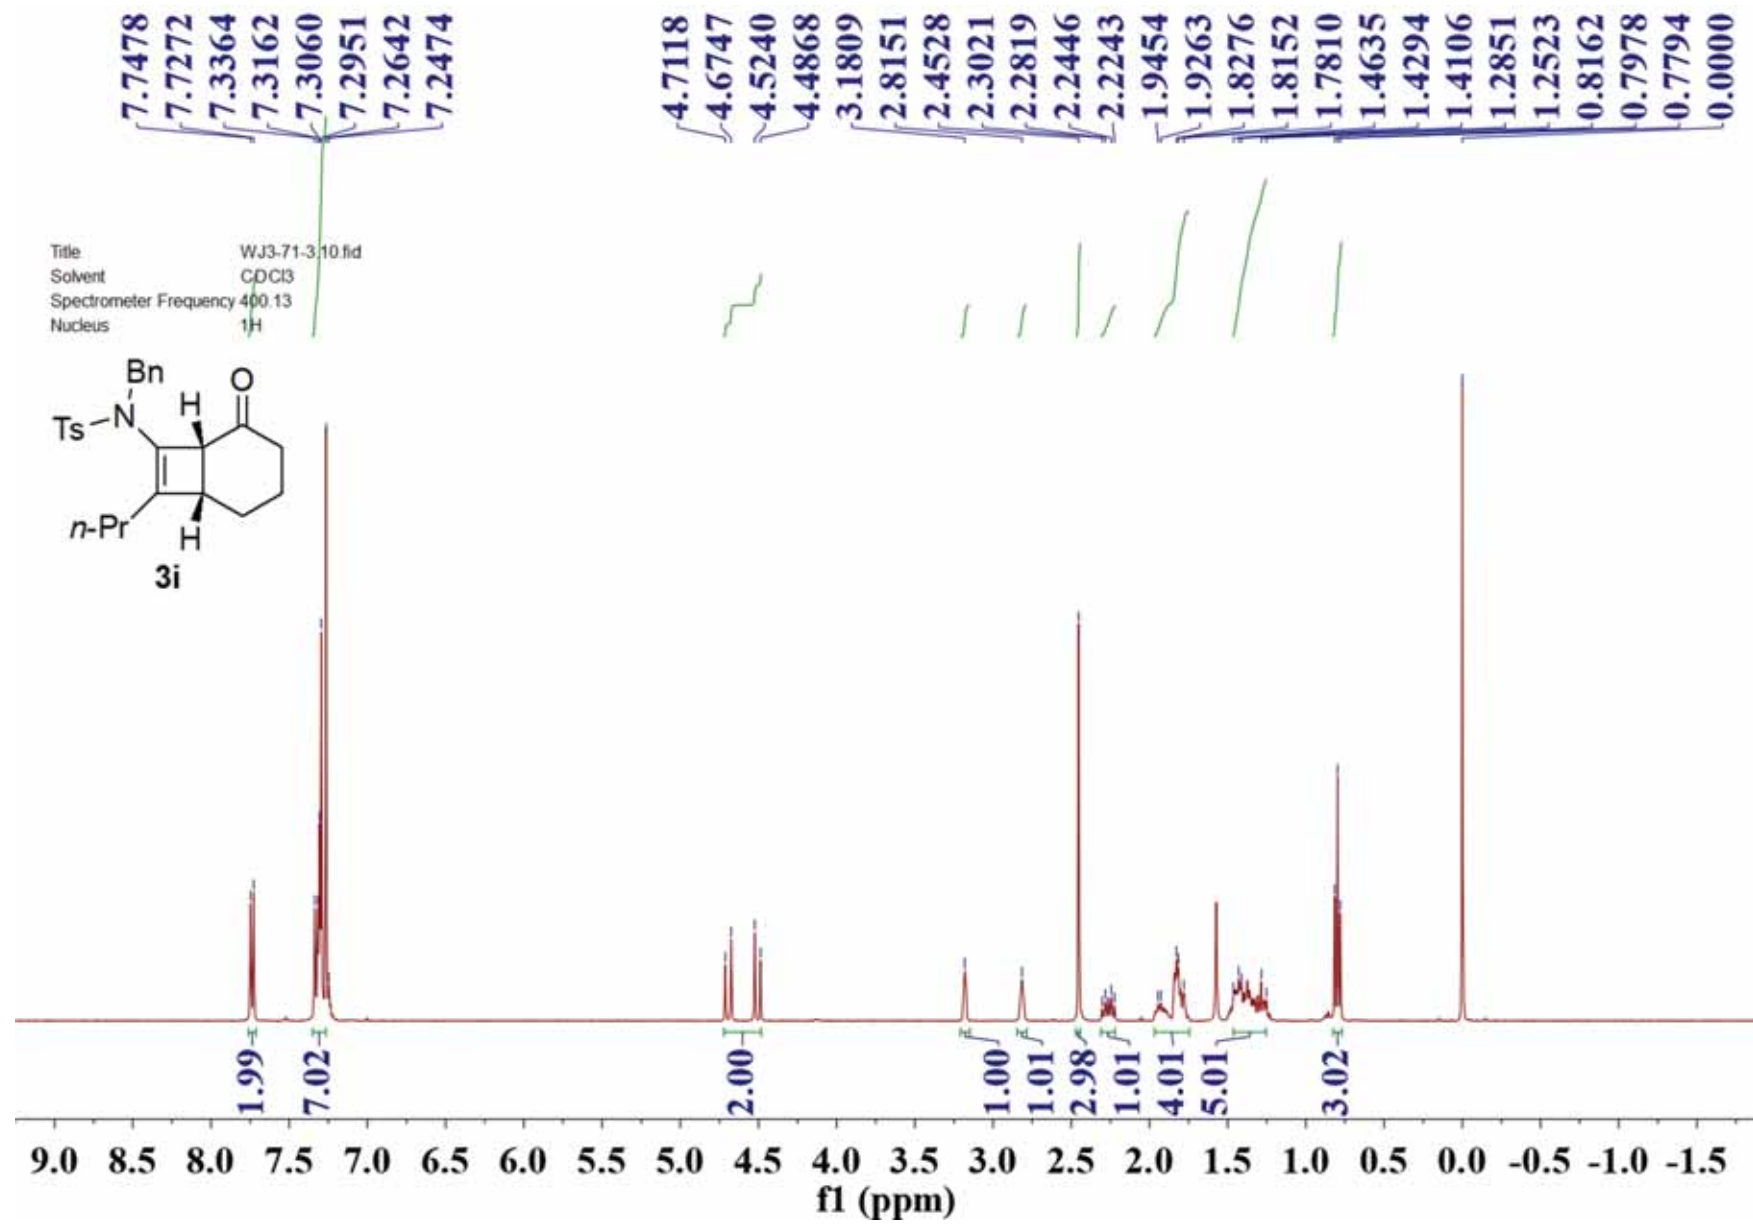

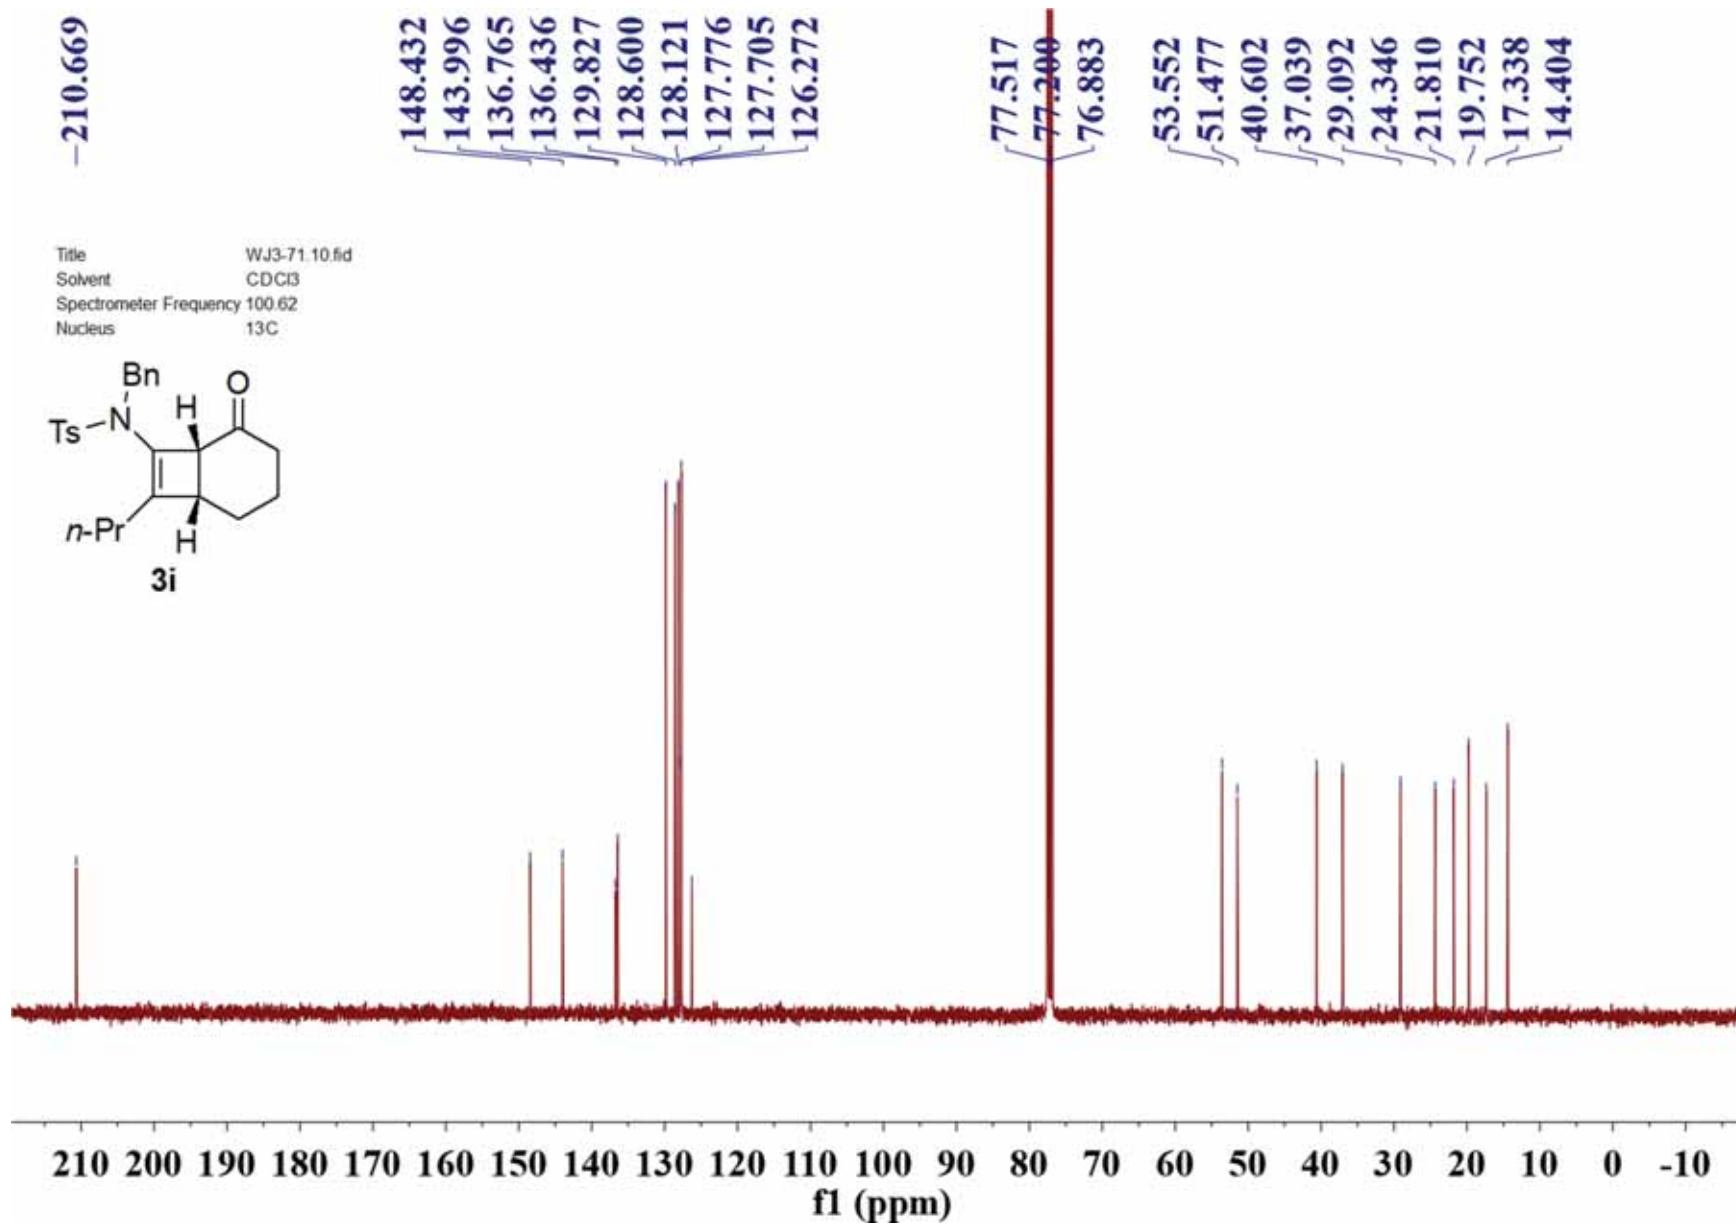

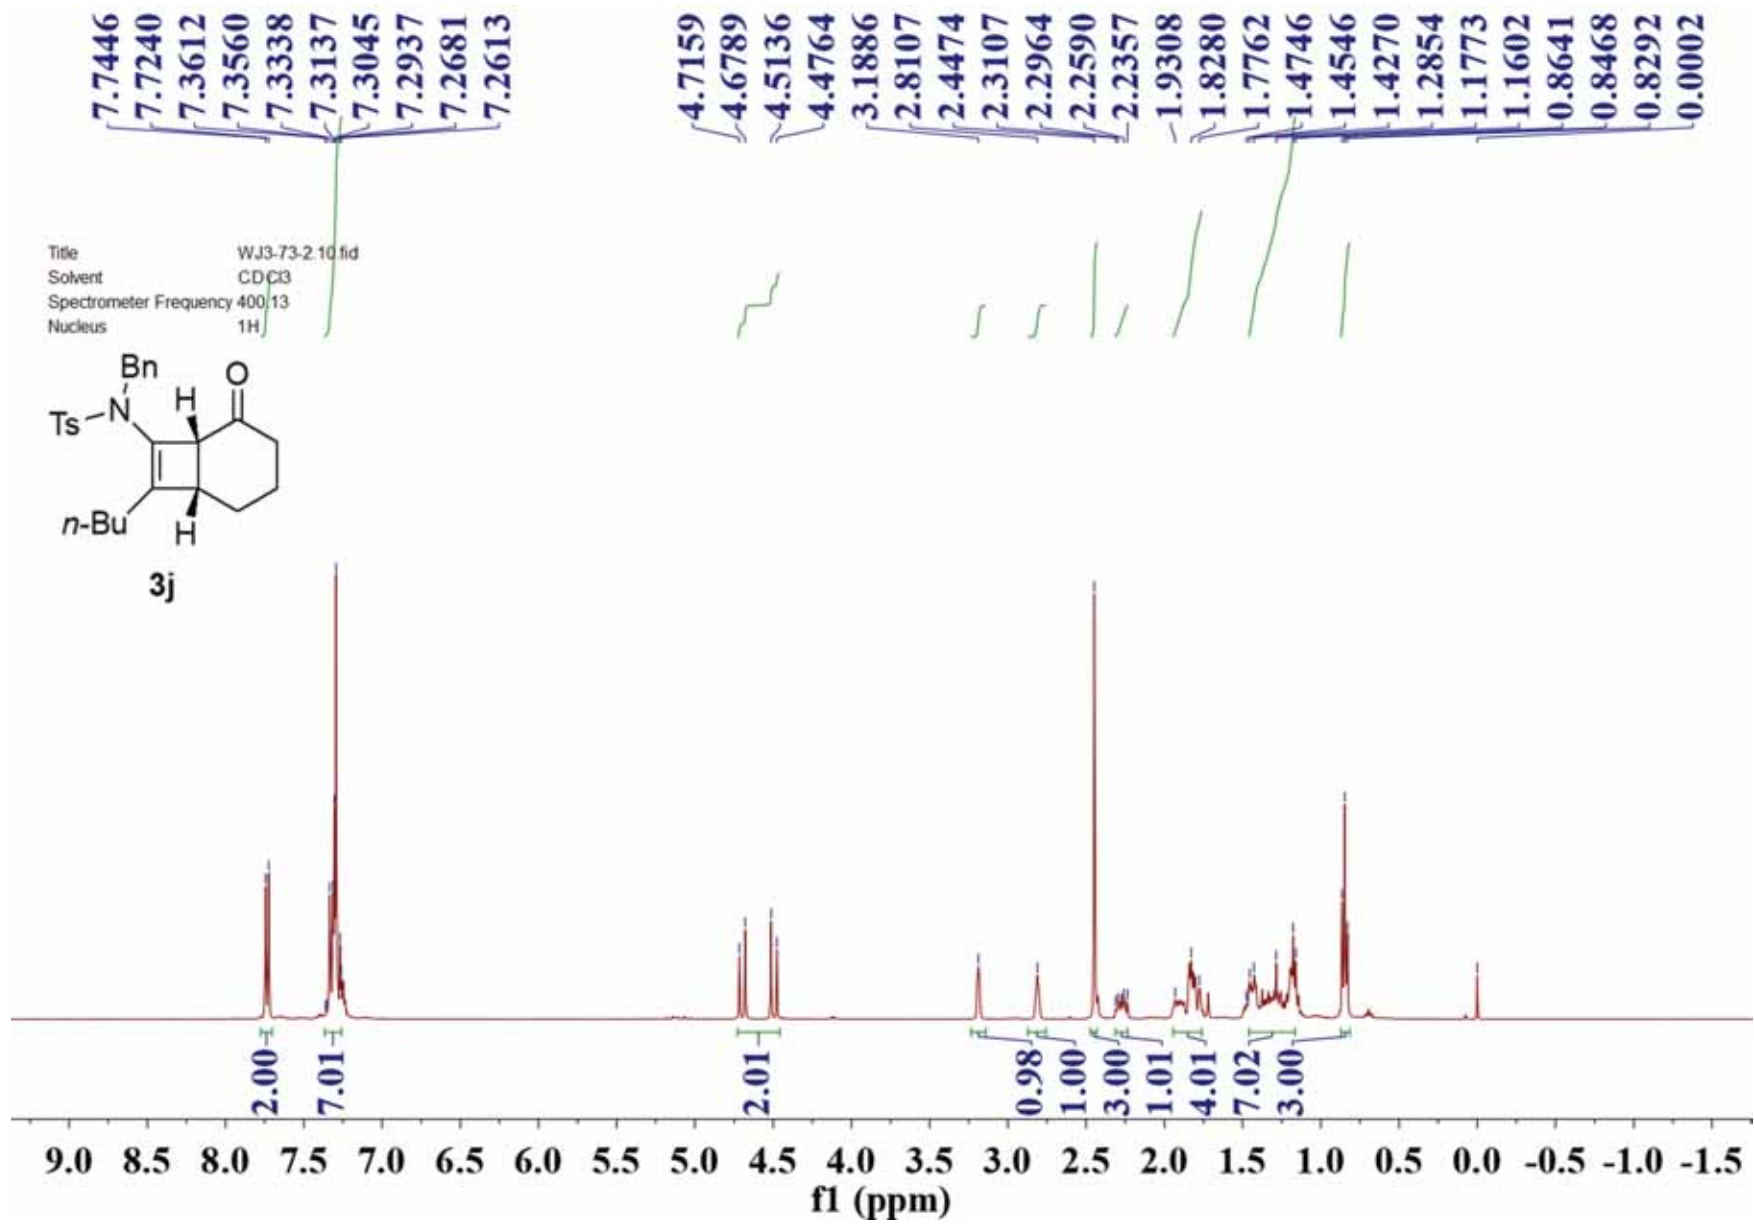

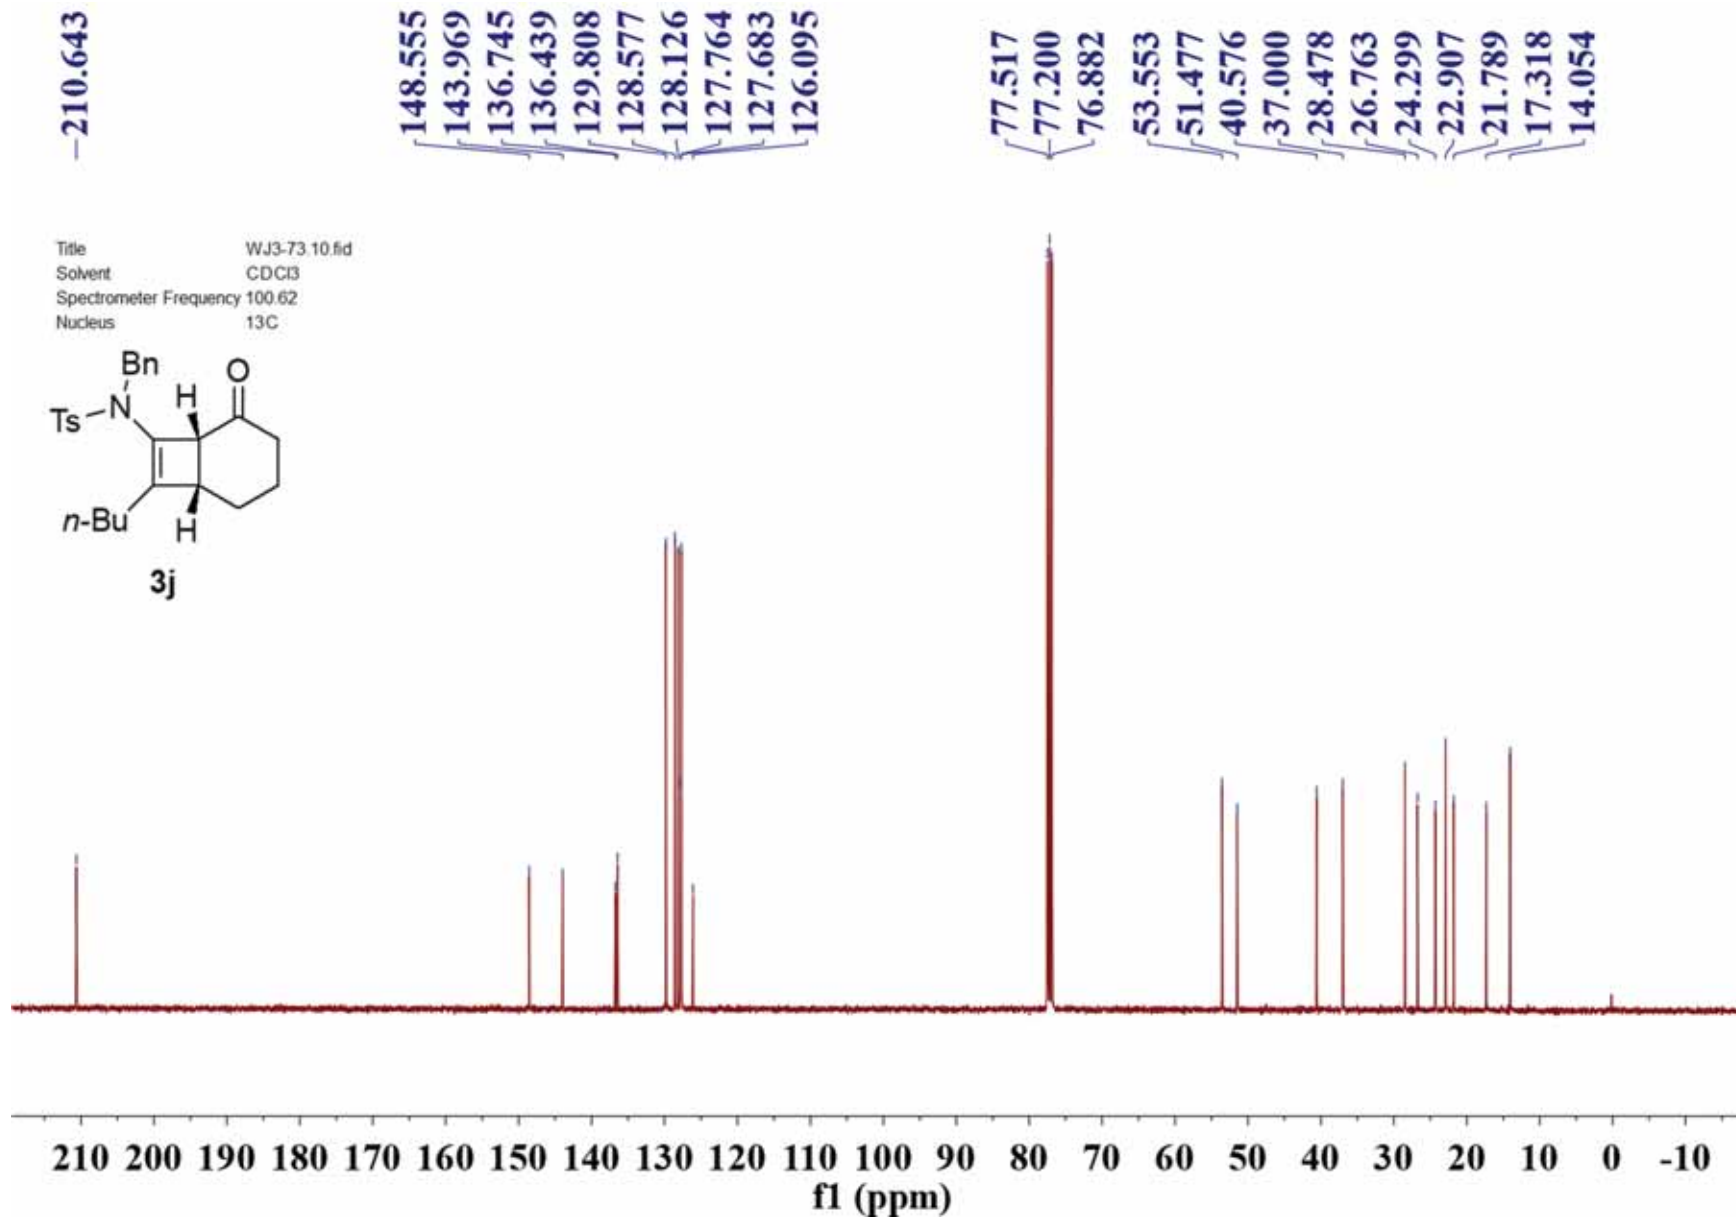

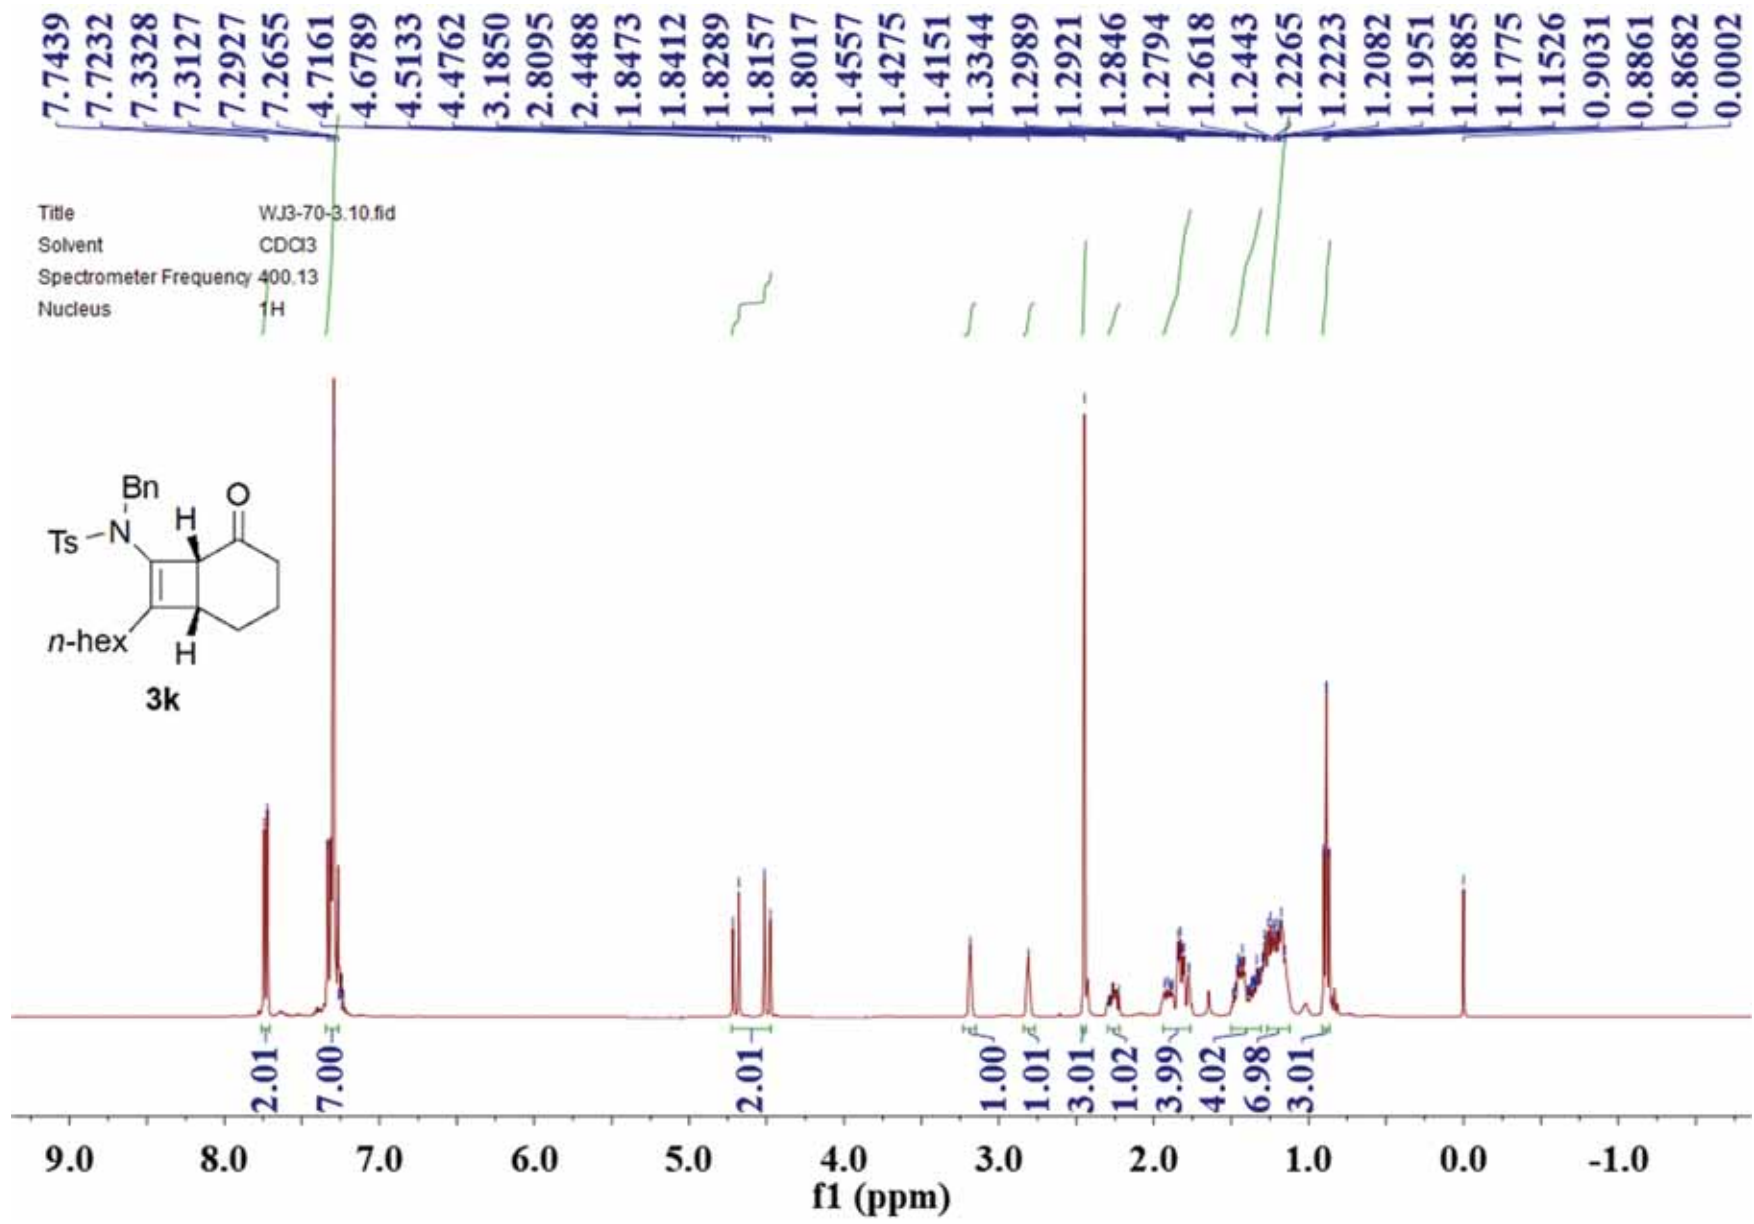

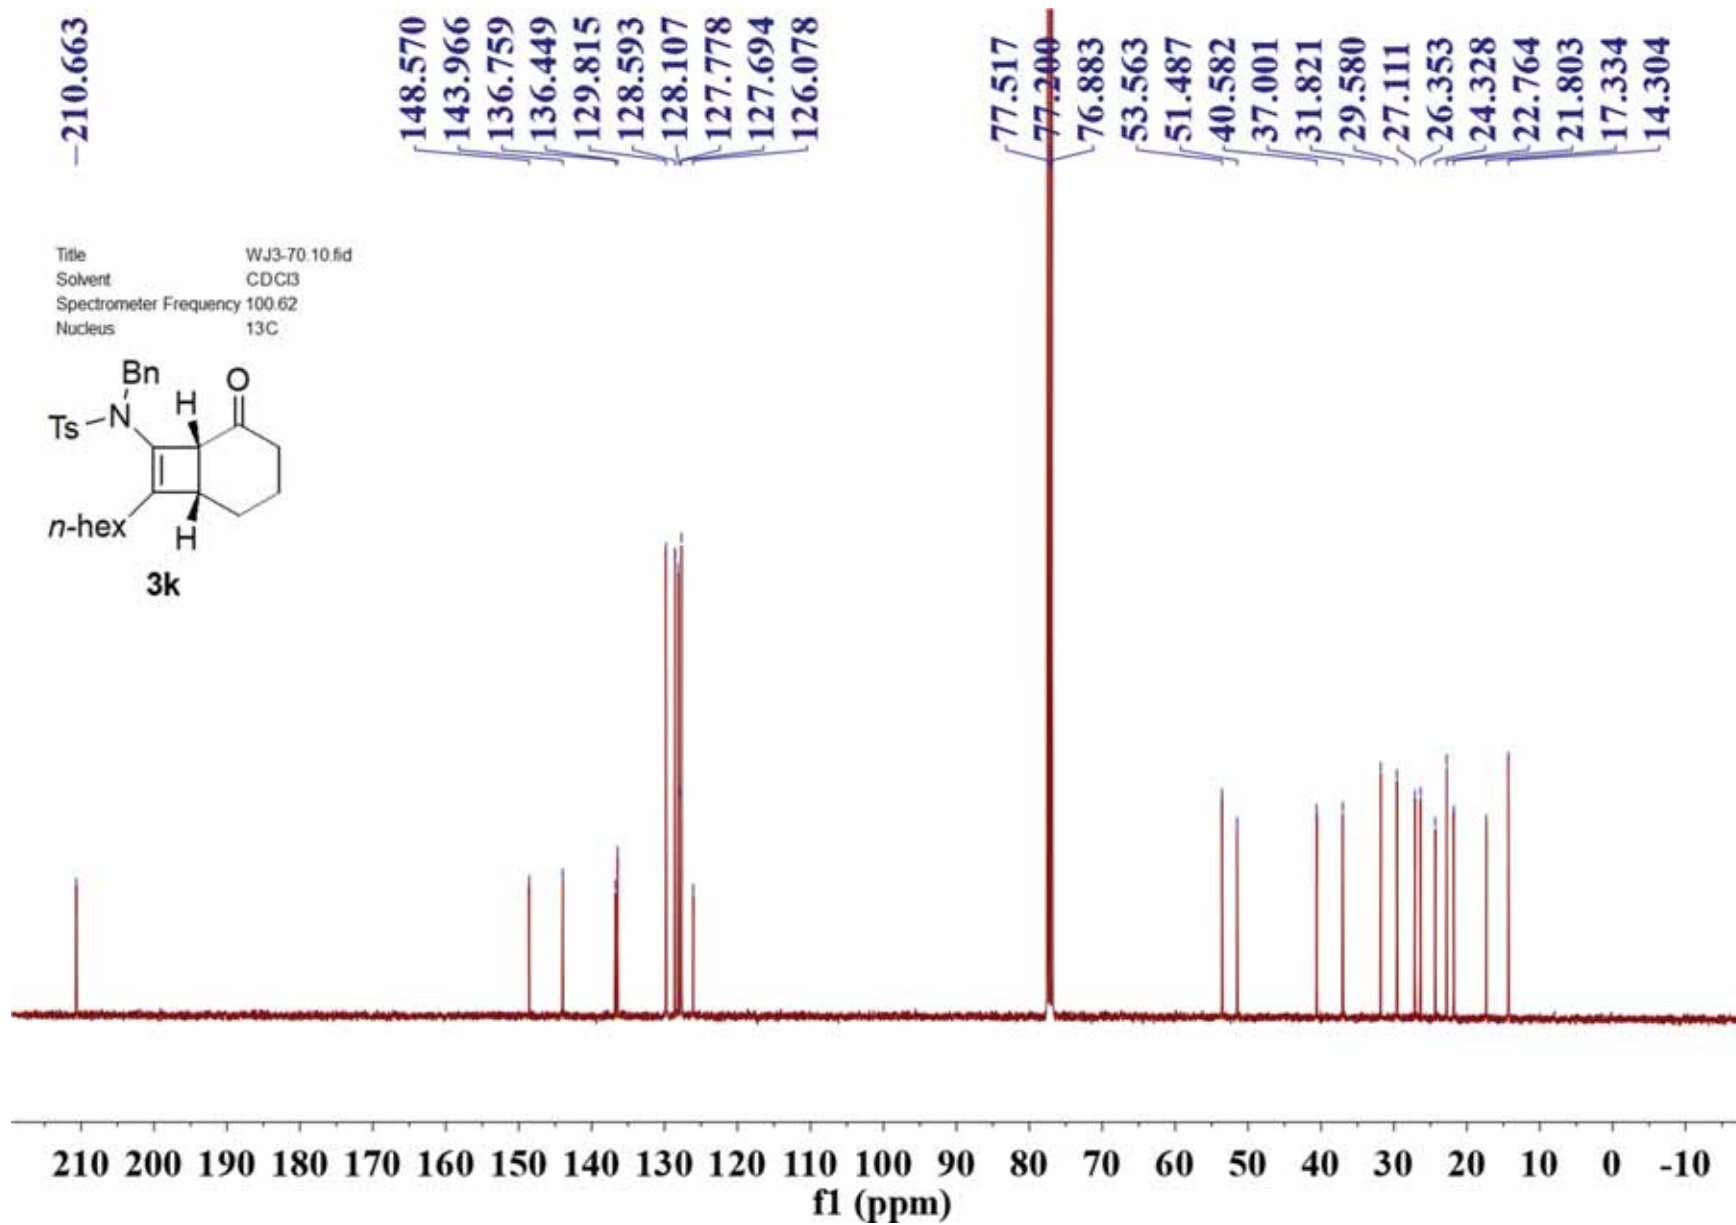

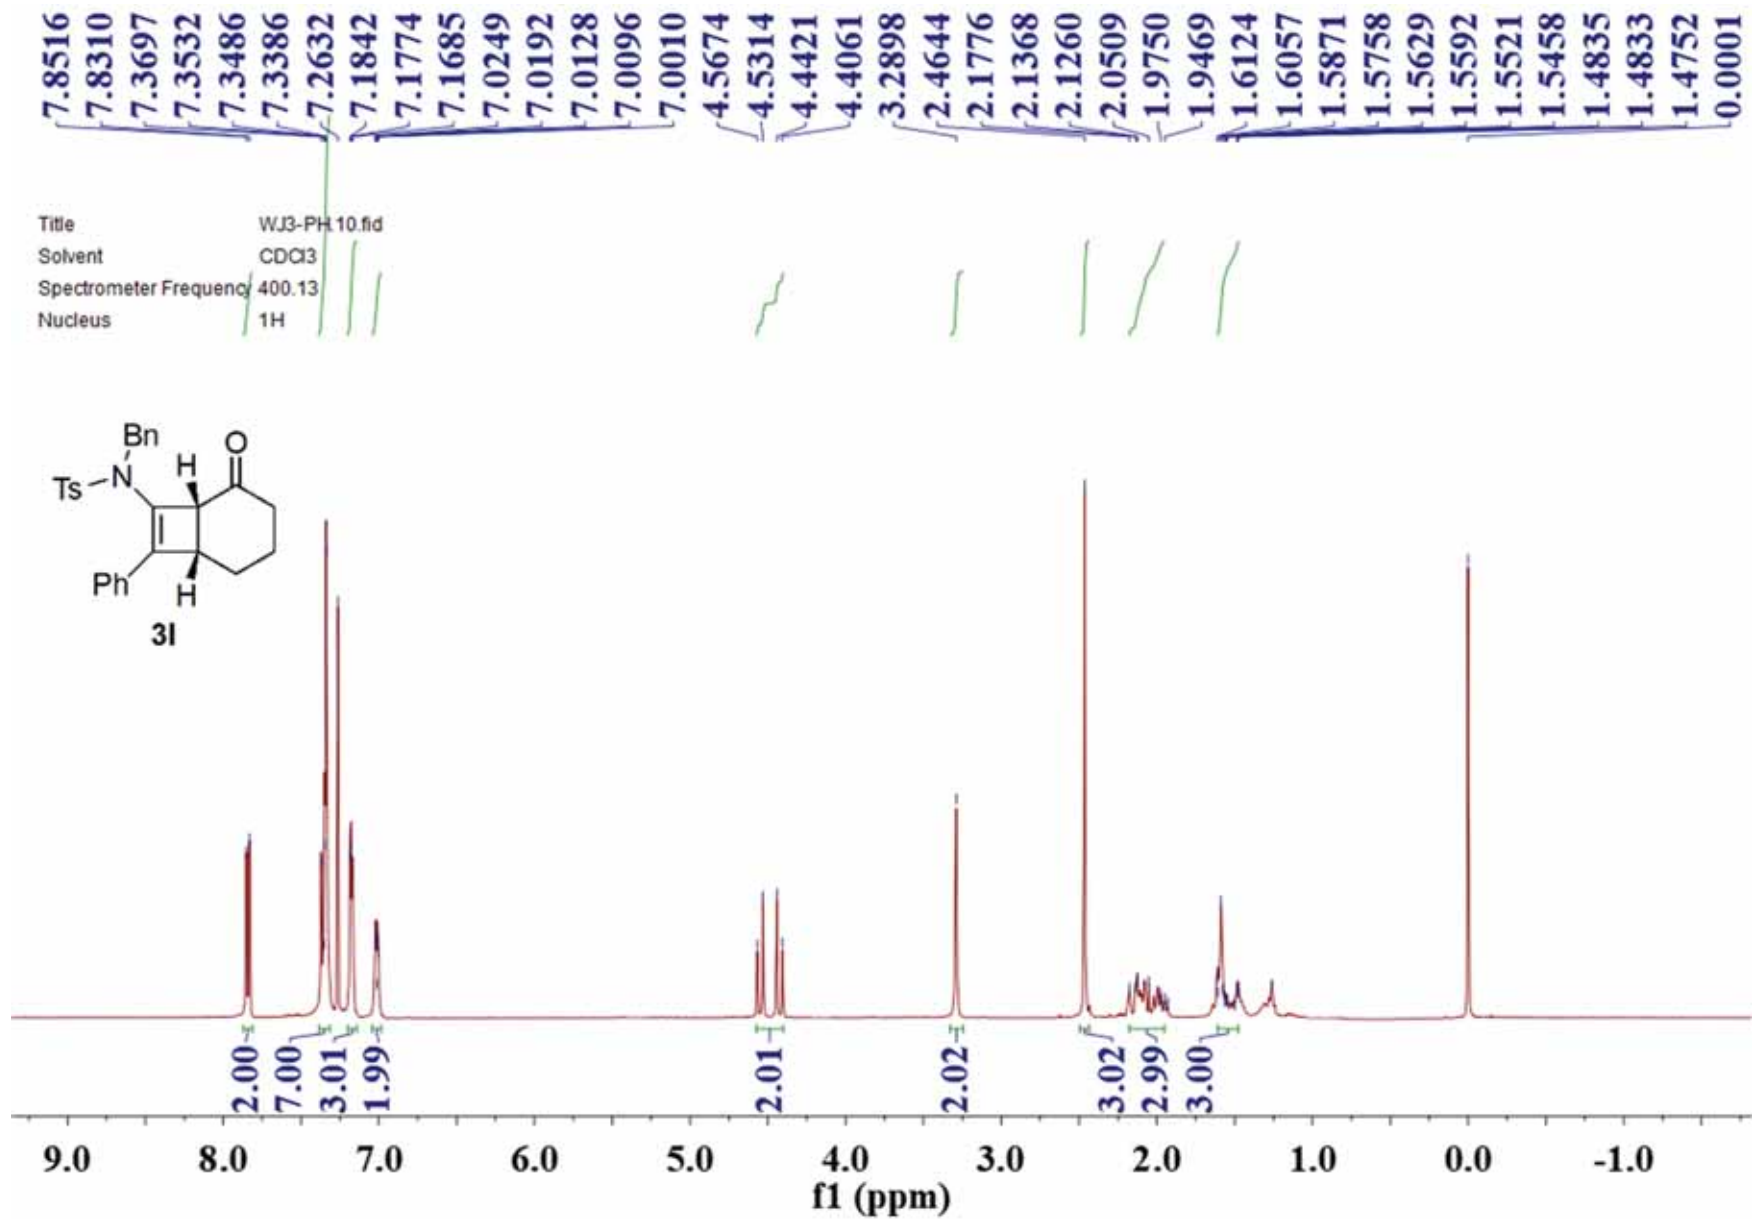

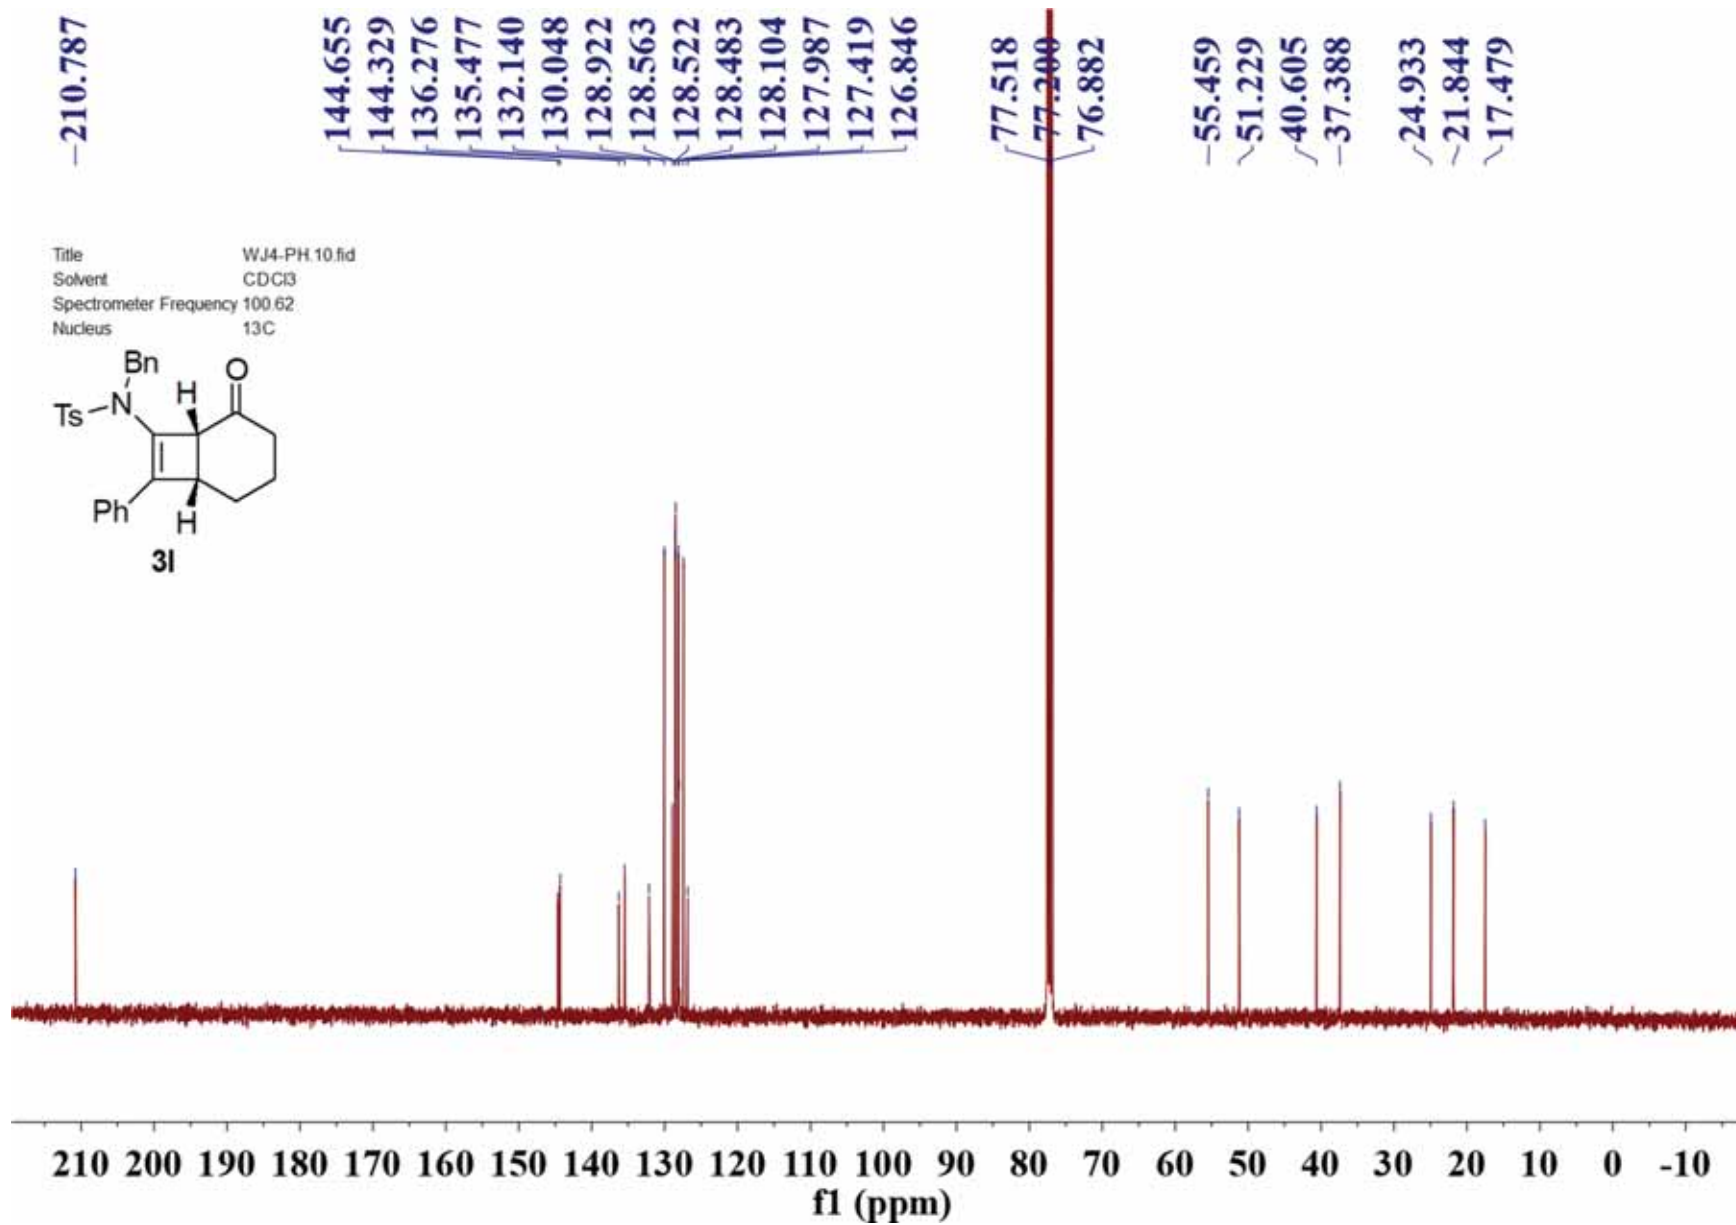



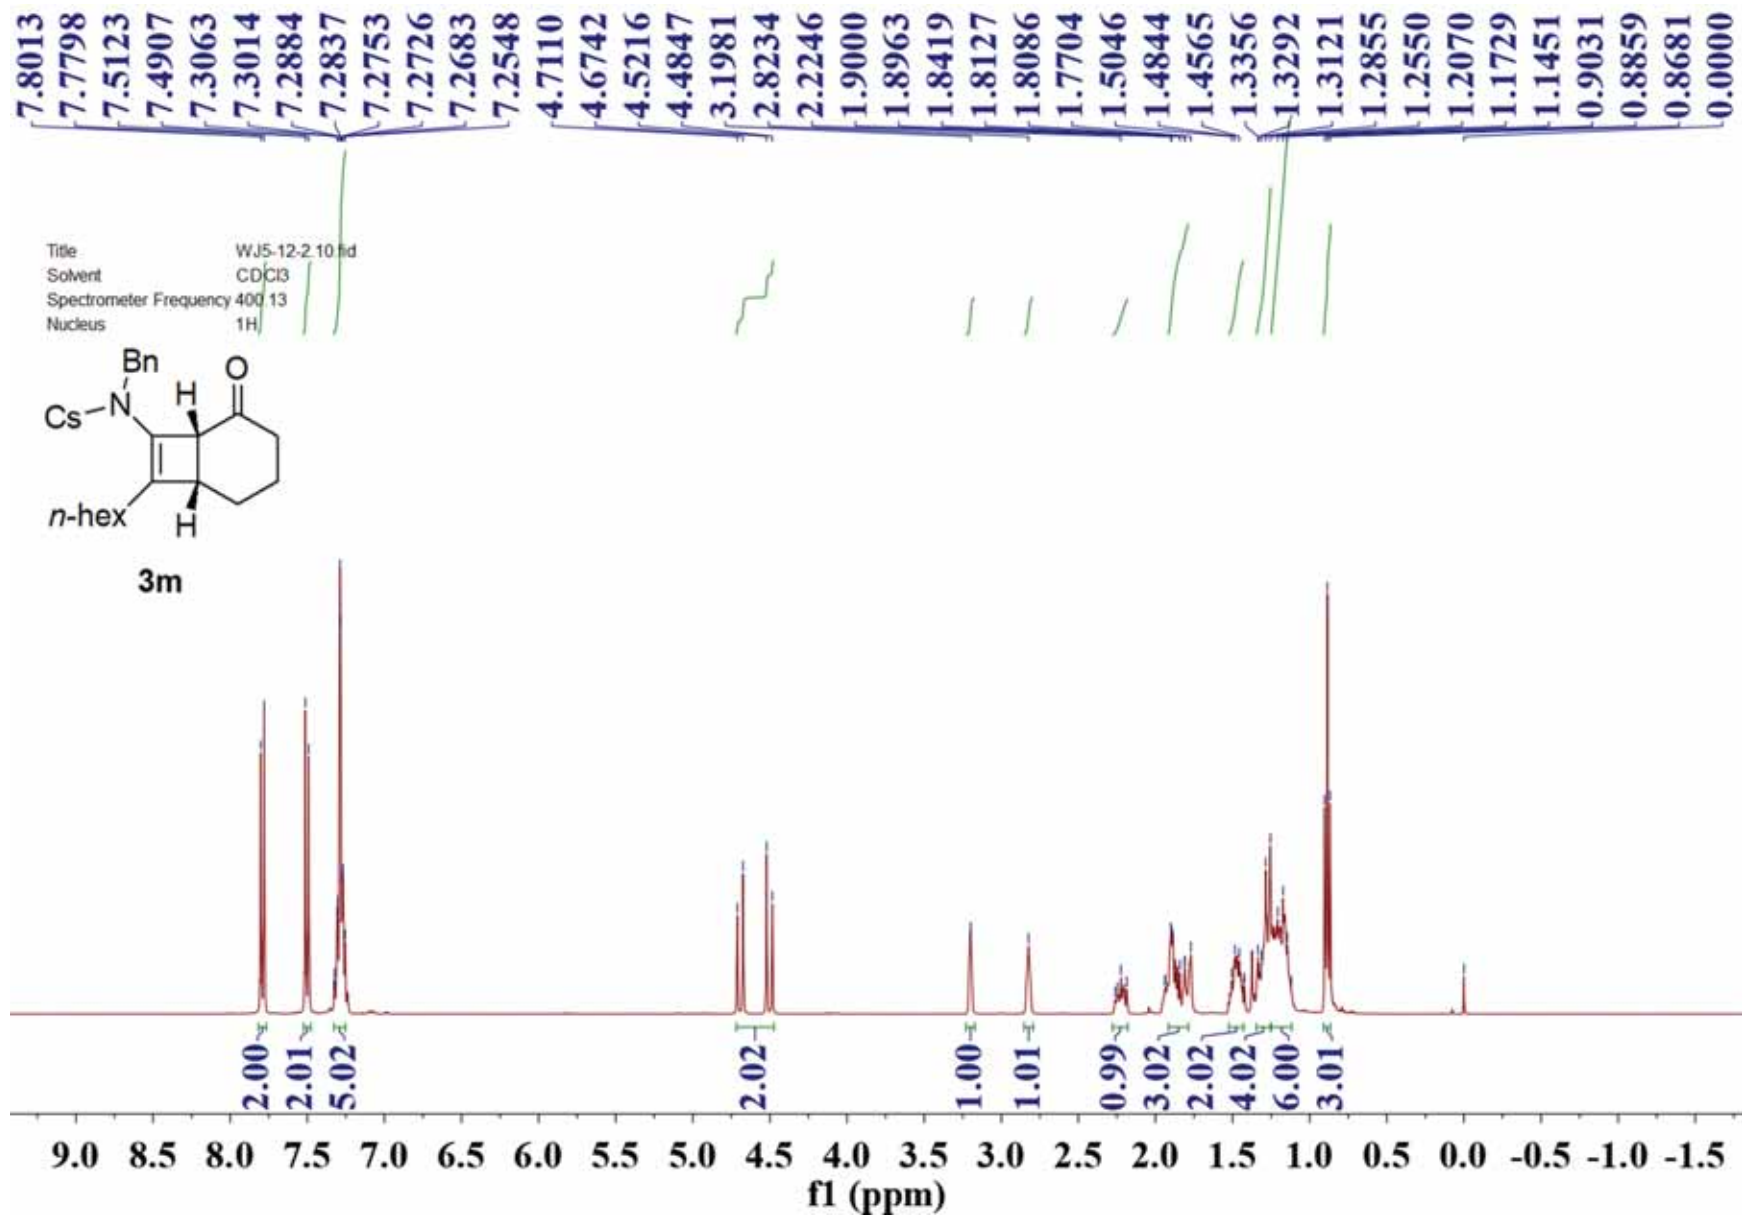

-210.327

149.284  
139.662  
138.224  
136.034  
129.480  
129.114  
128.656  
128.132  
127.946  
125.653

77.518  
77.200  
76.882  
53.345  
51.675  
40.772  
37.039  
31.782  
29.543  
27.094  
26.337  
24.310  
22.733  
17.366  
14.277

Title WJ5-12-2.10.fid  
Solvent CDCl3  
Spectrometer Frequency 100.62  
Nucleus 13C

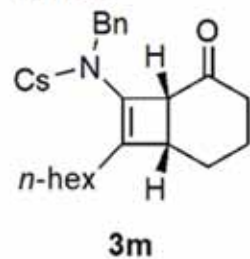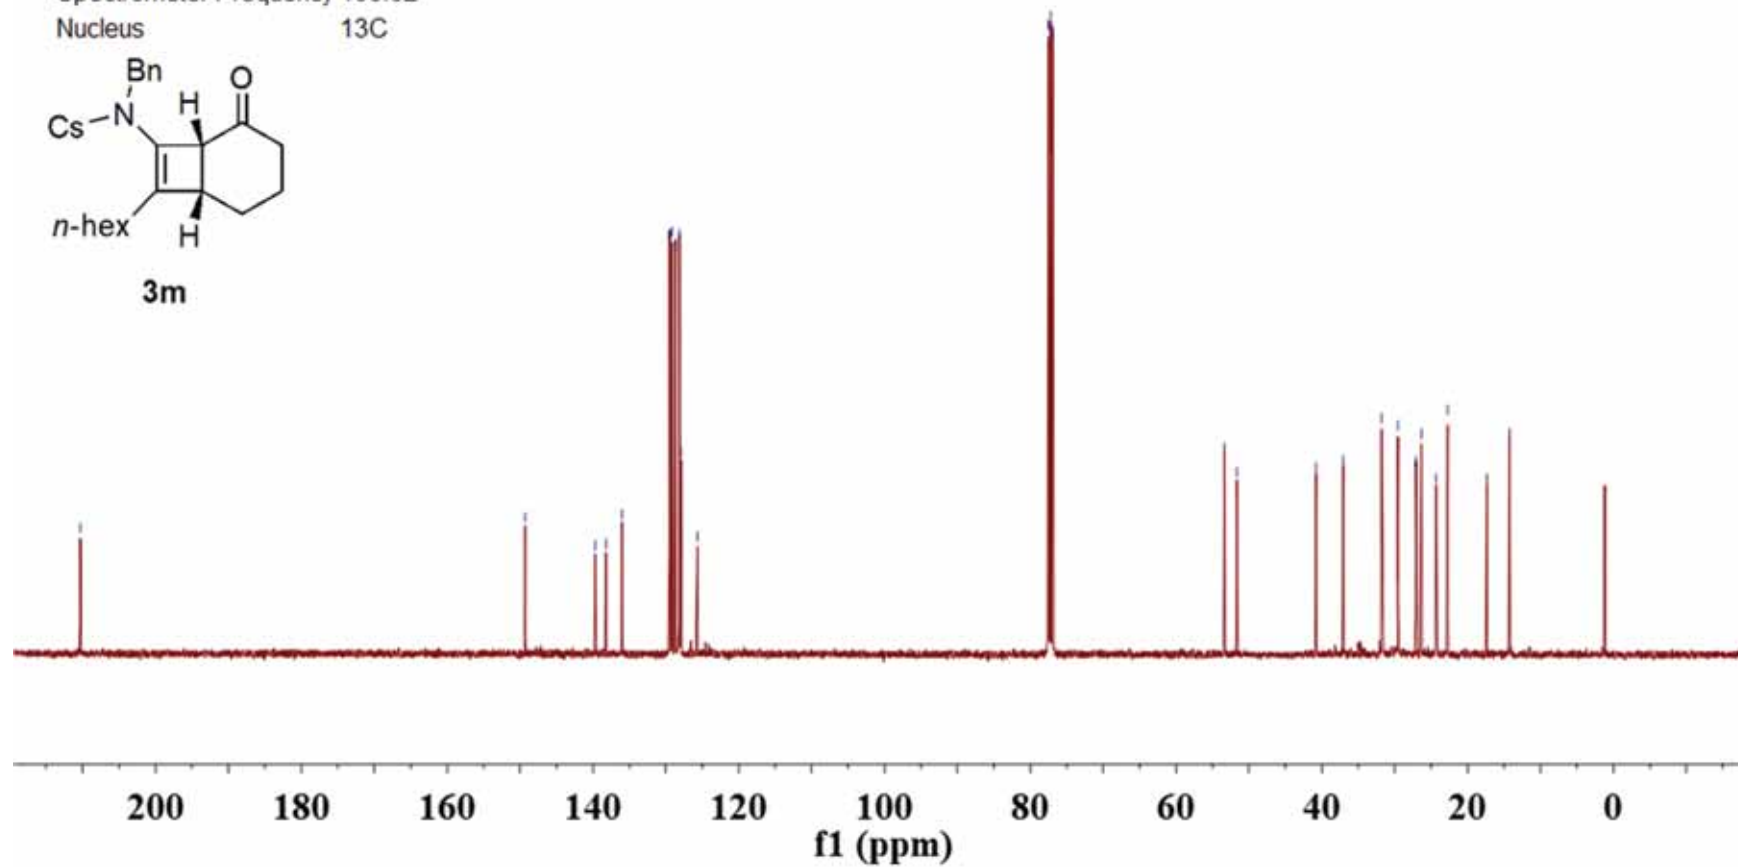

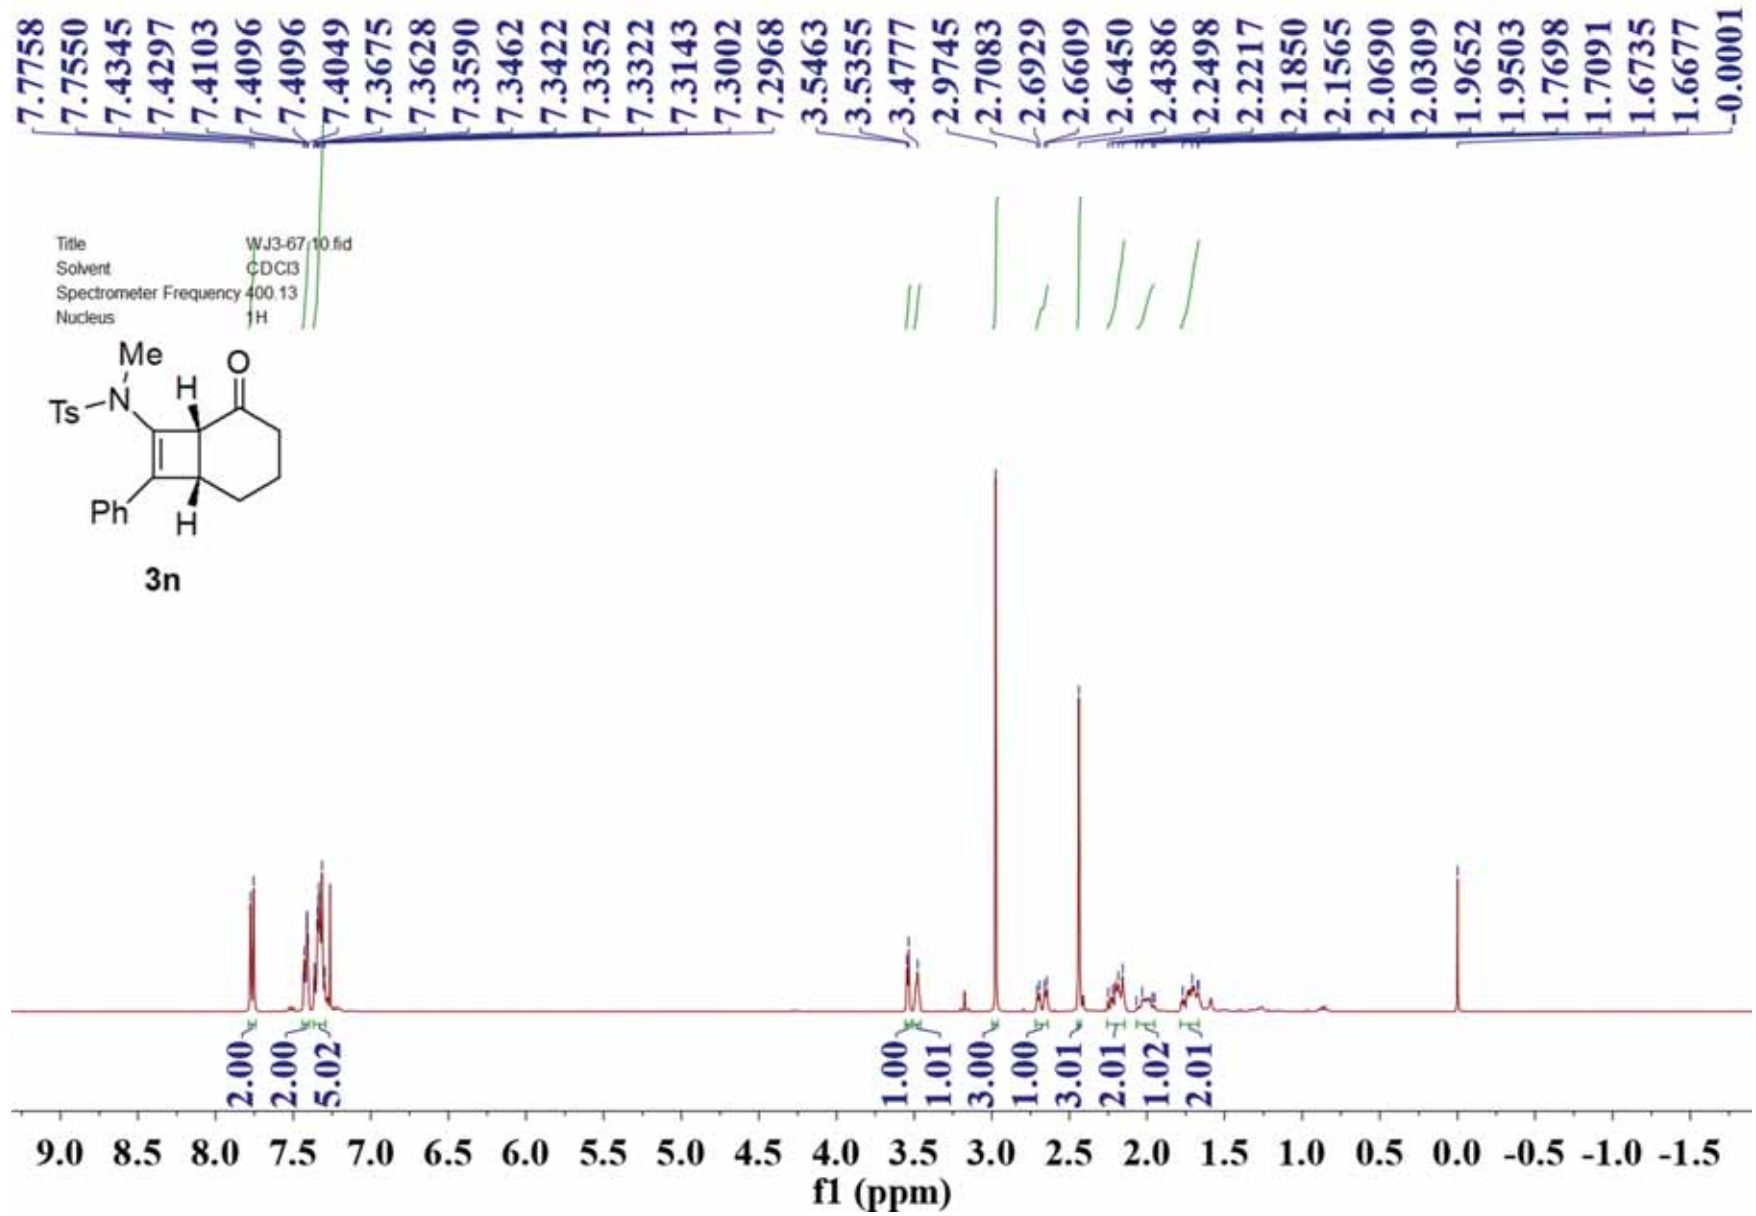

210.868

144.140  
141.767  
135.522  
131.651  
129.869  
128.792  
128.609  
127.931  
127.292

77.521  
77.203  
76.852

54.974

40.210  
37.399  
35.741  
24.827  
21.738  
17.801

Title WJ3-67.20.fid  
Solvent CDCl3  
Spectrometer Frequency 100.62  
Nucleus 13C

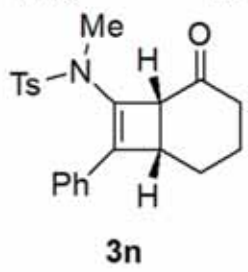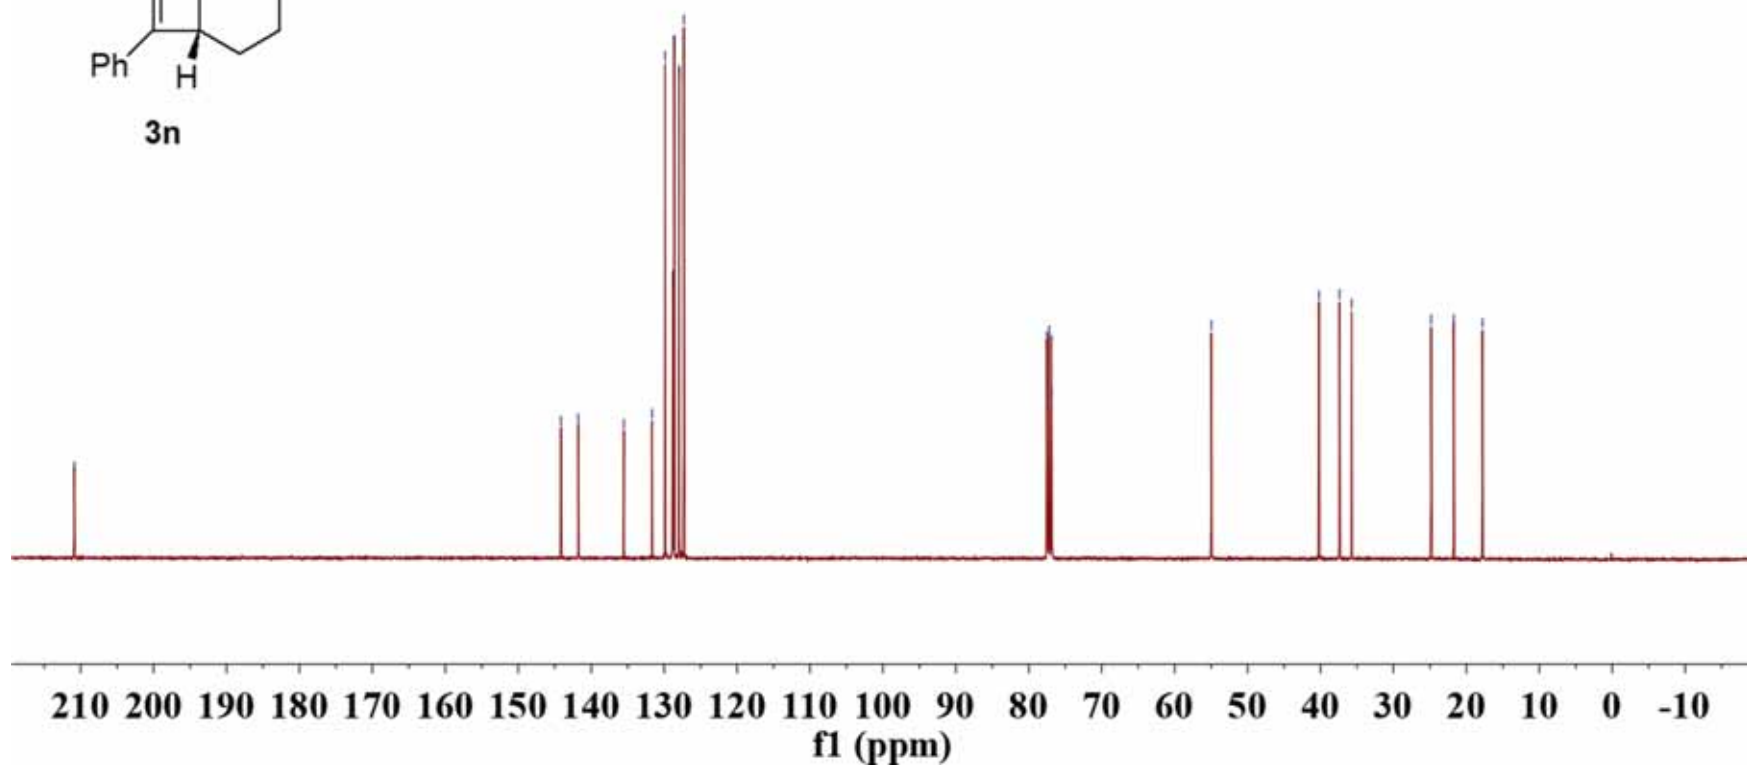

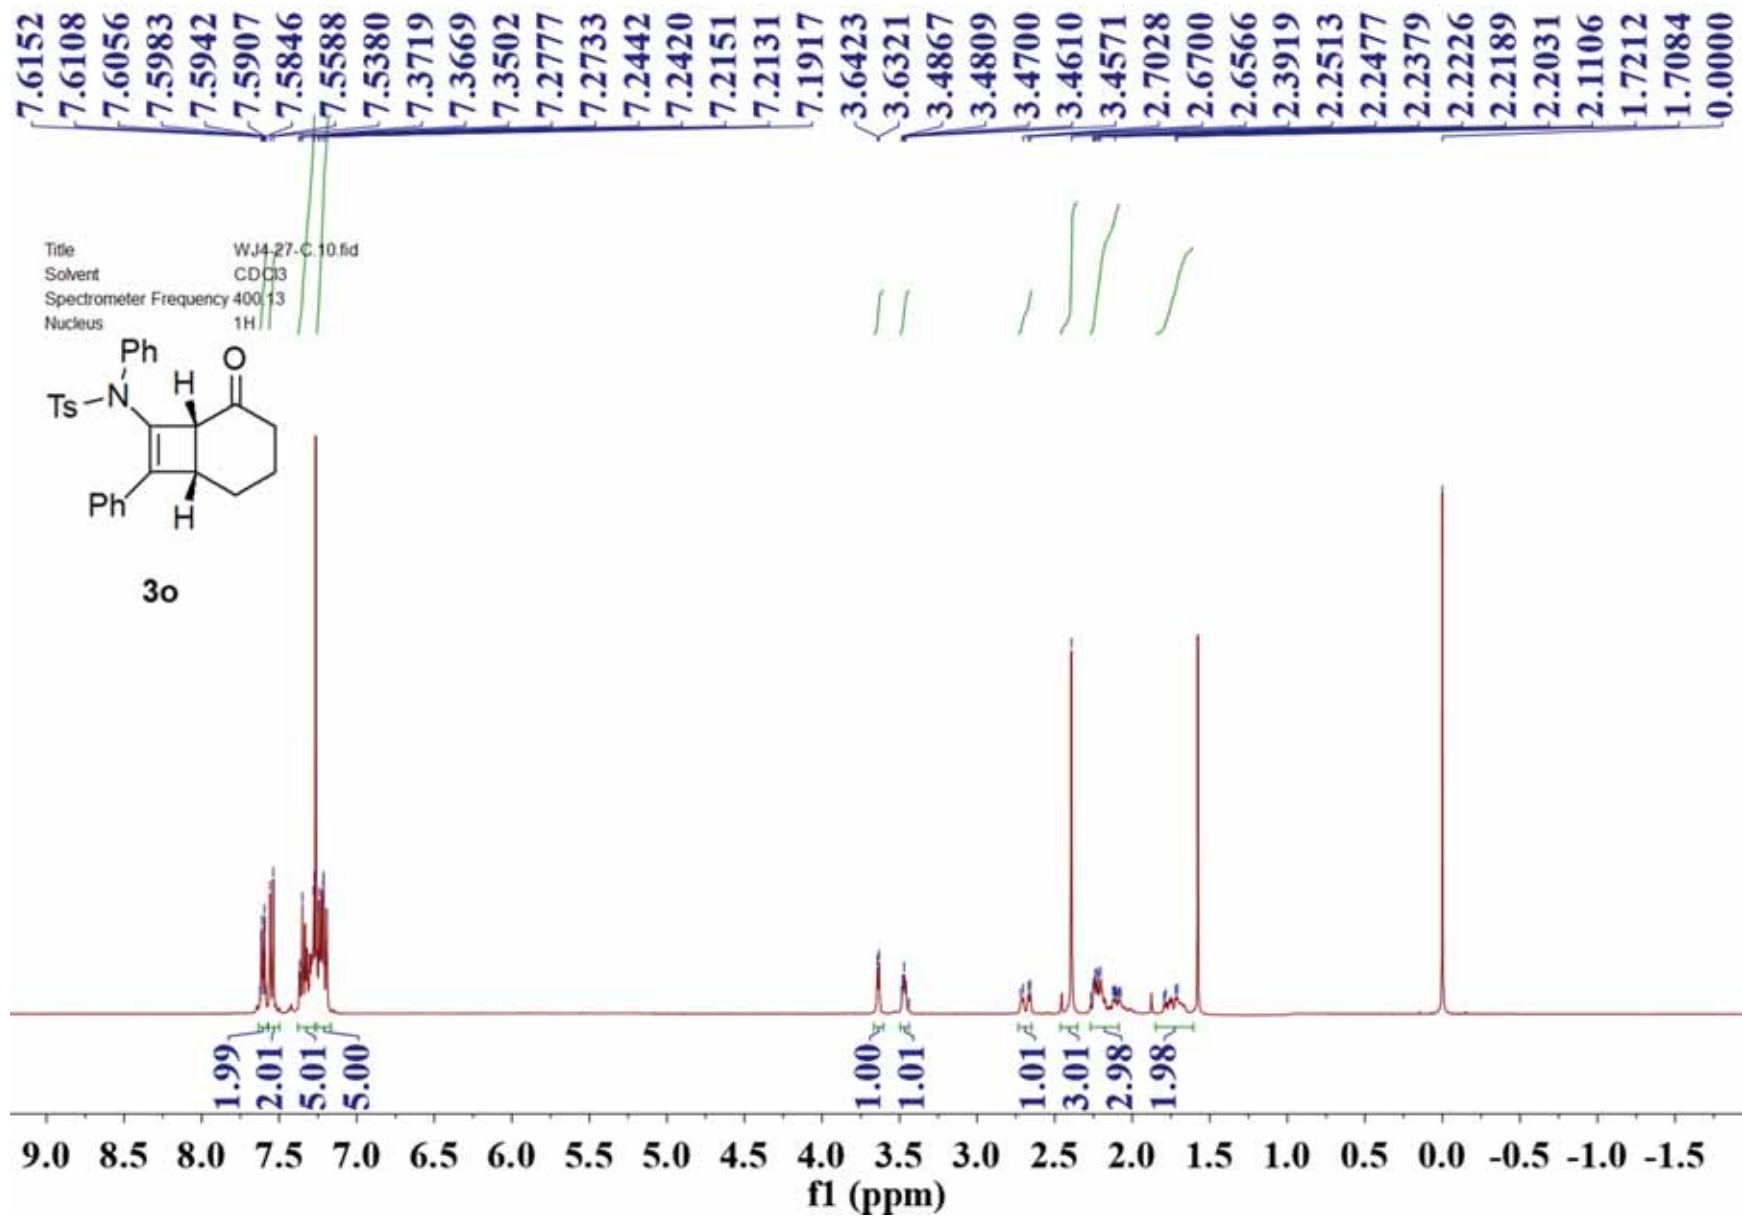

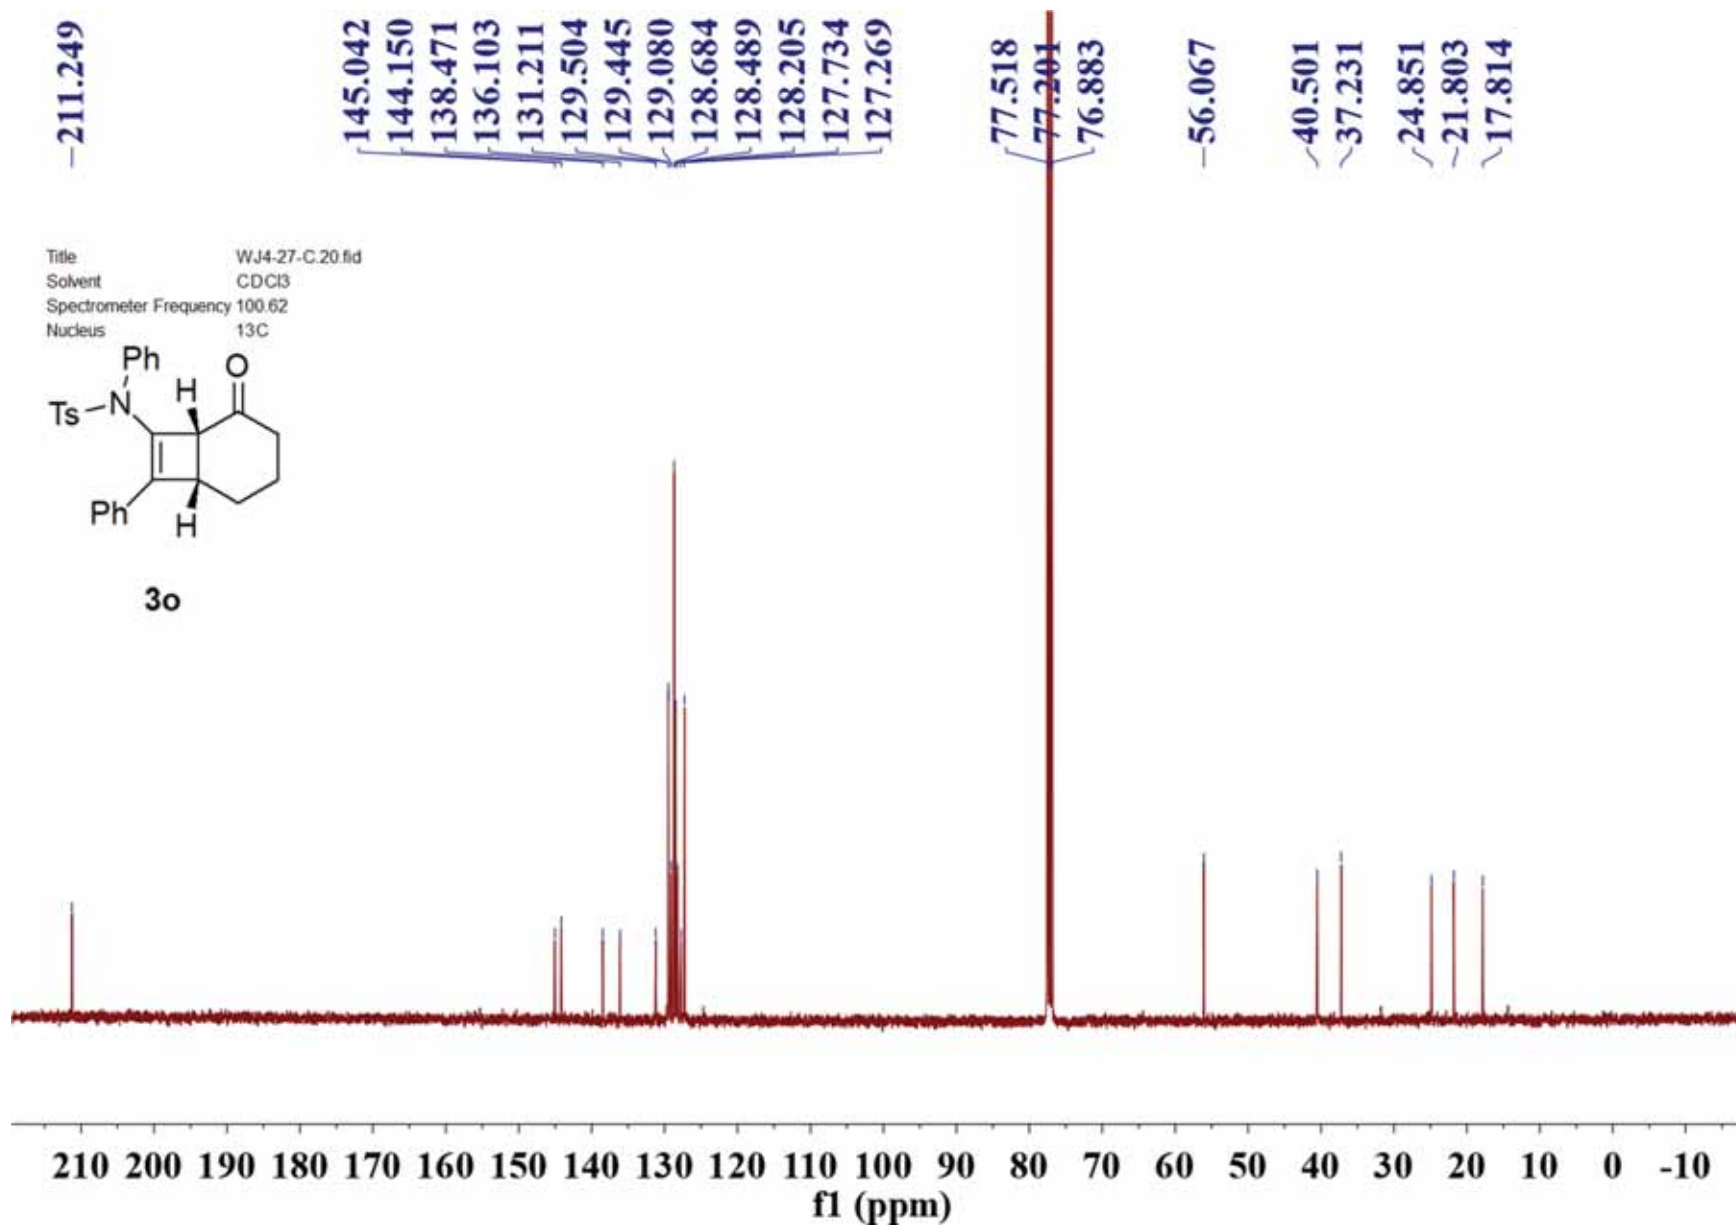

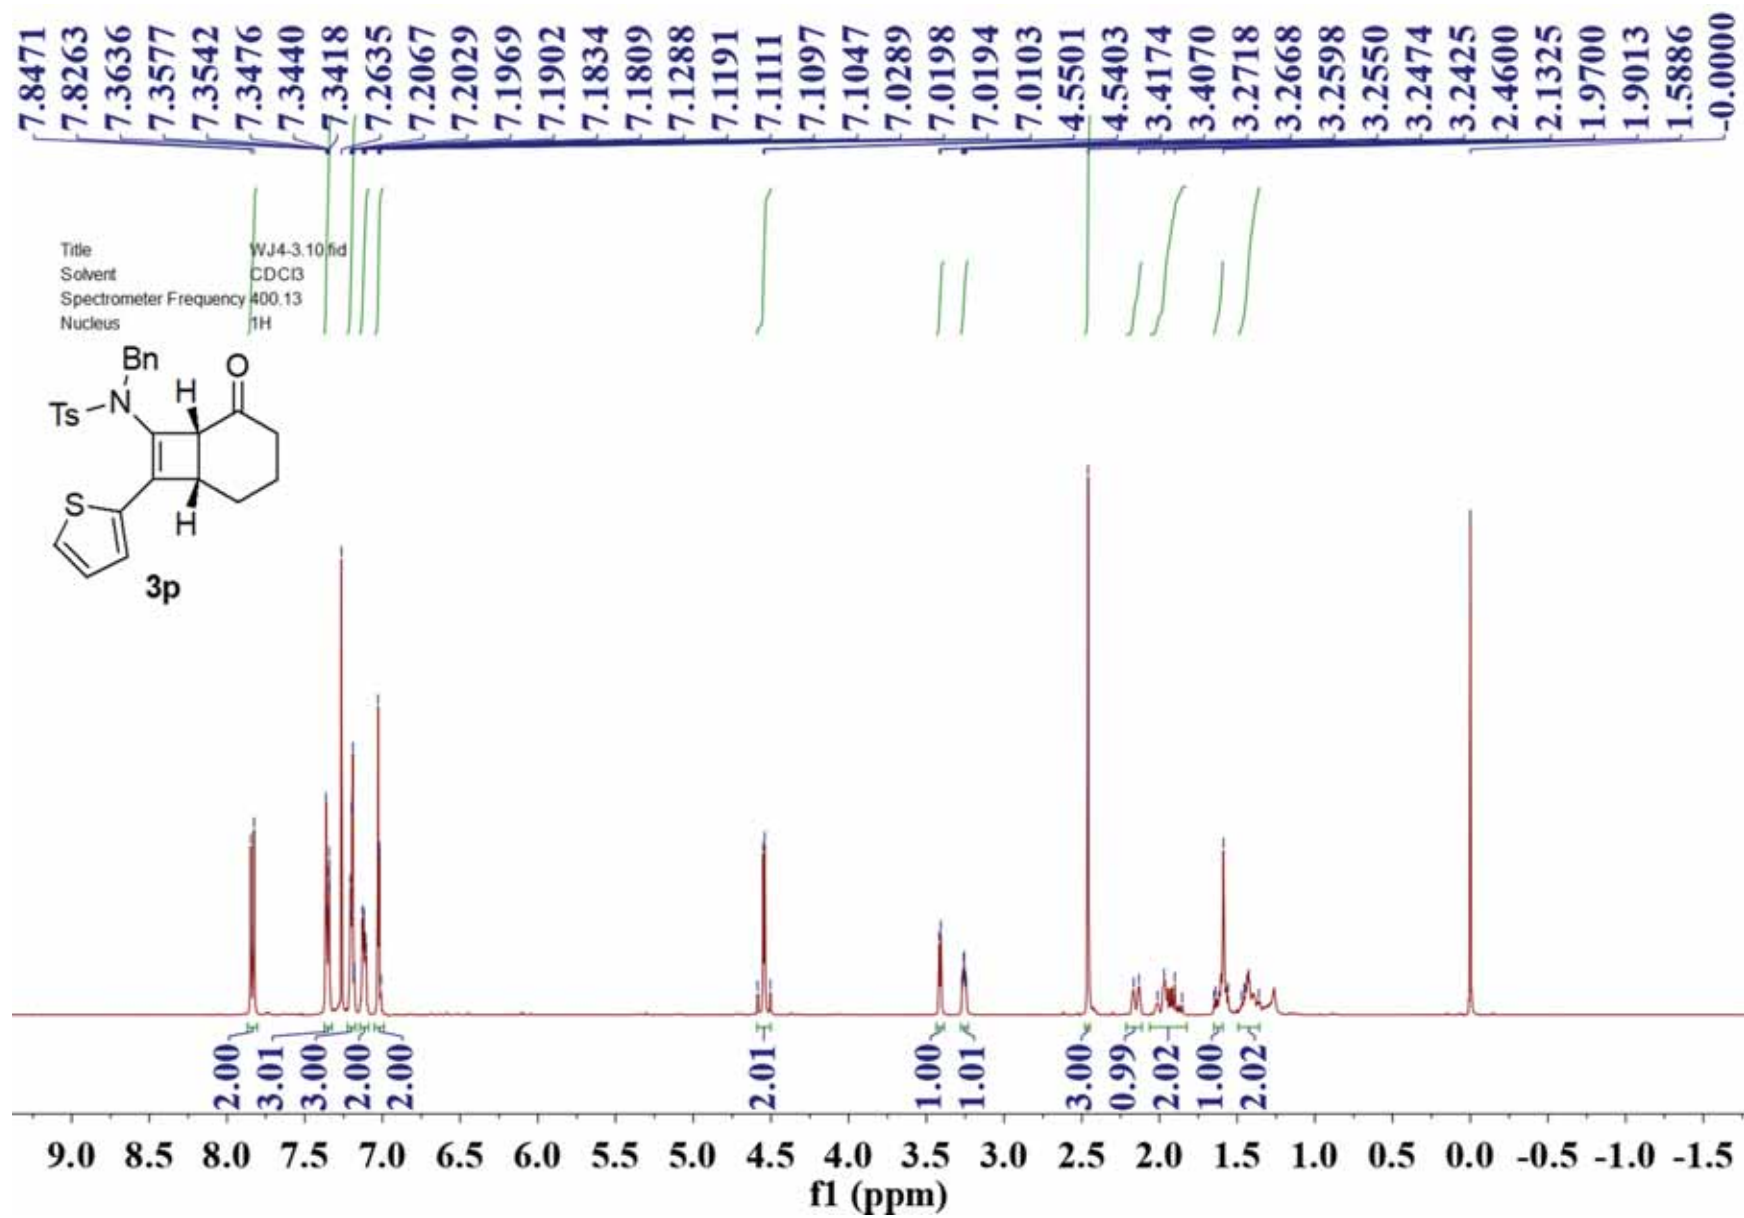

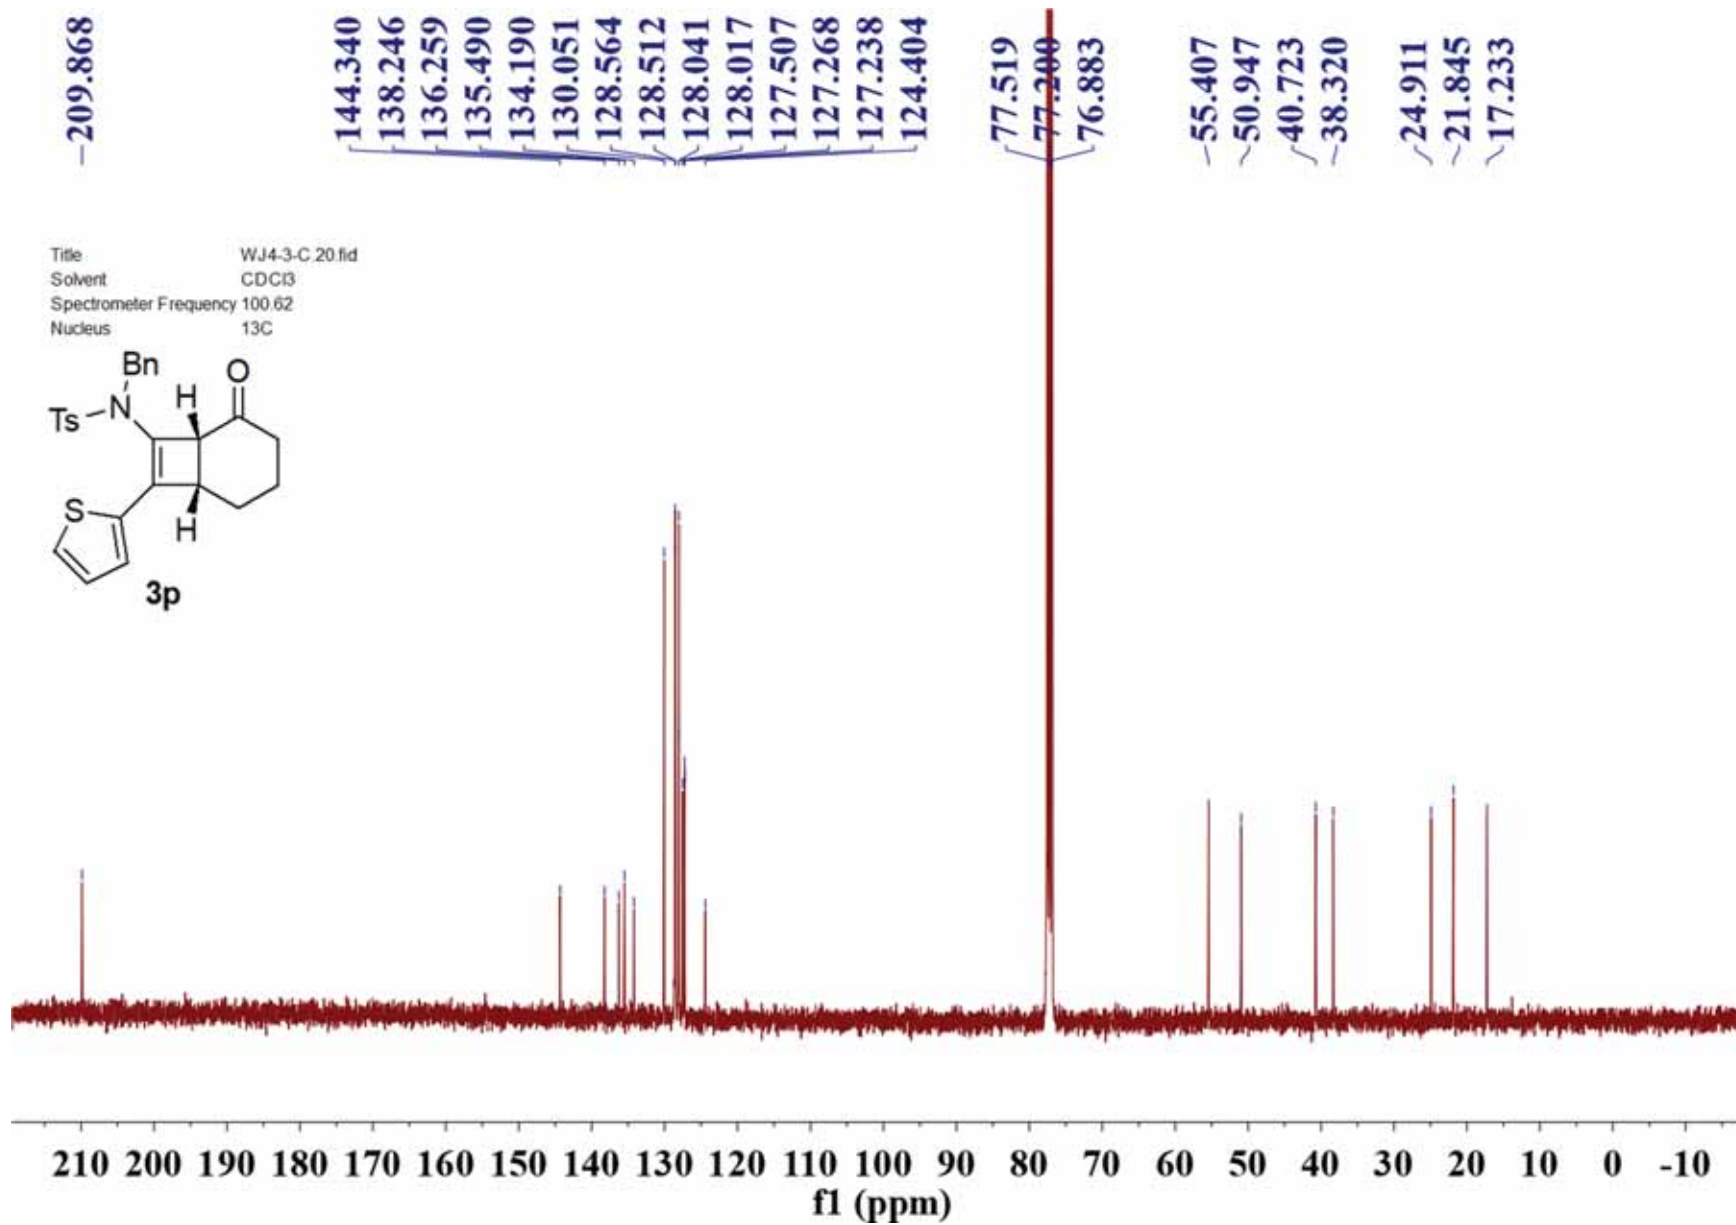



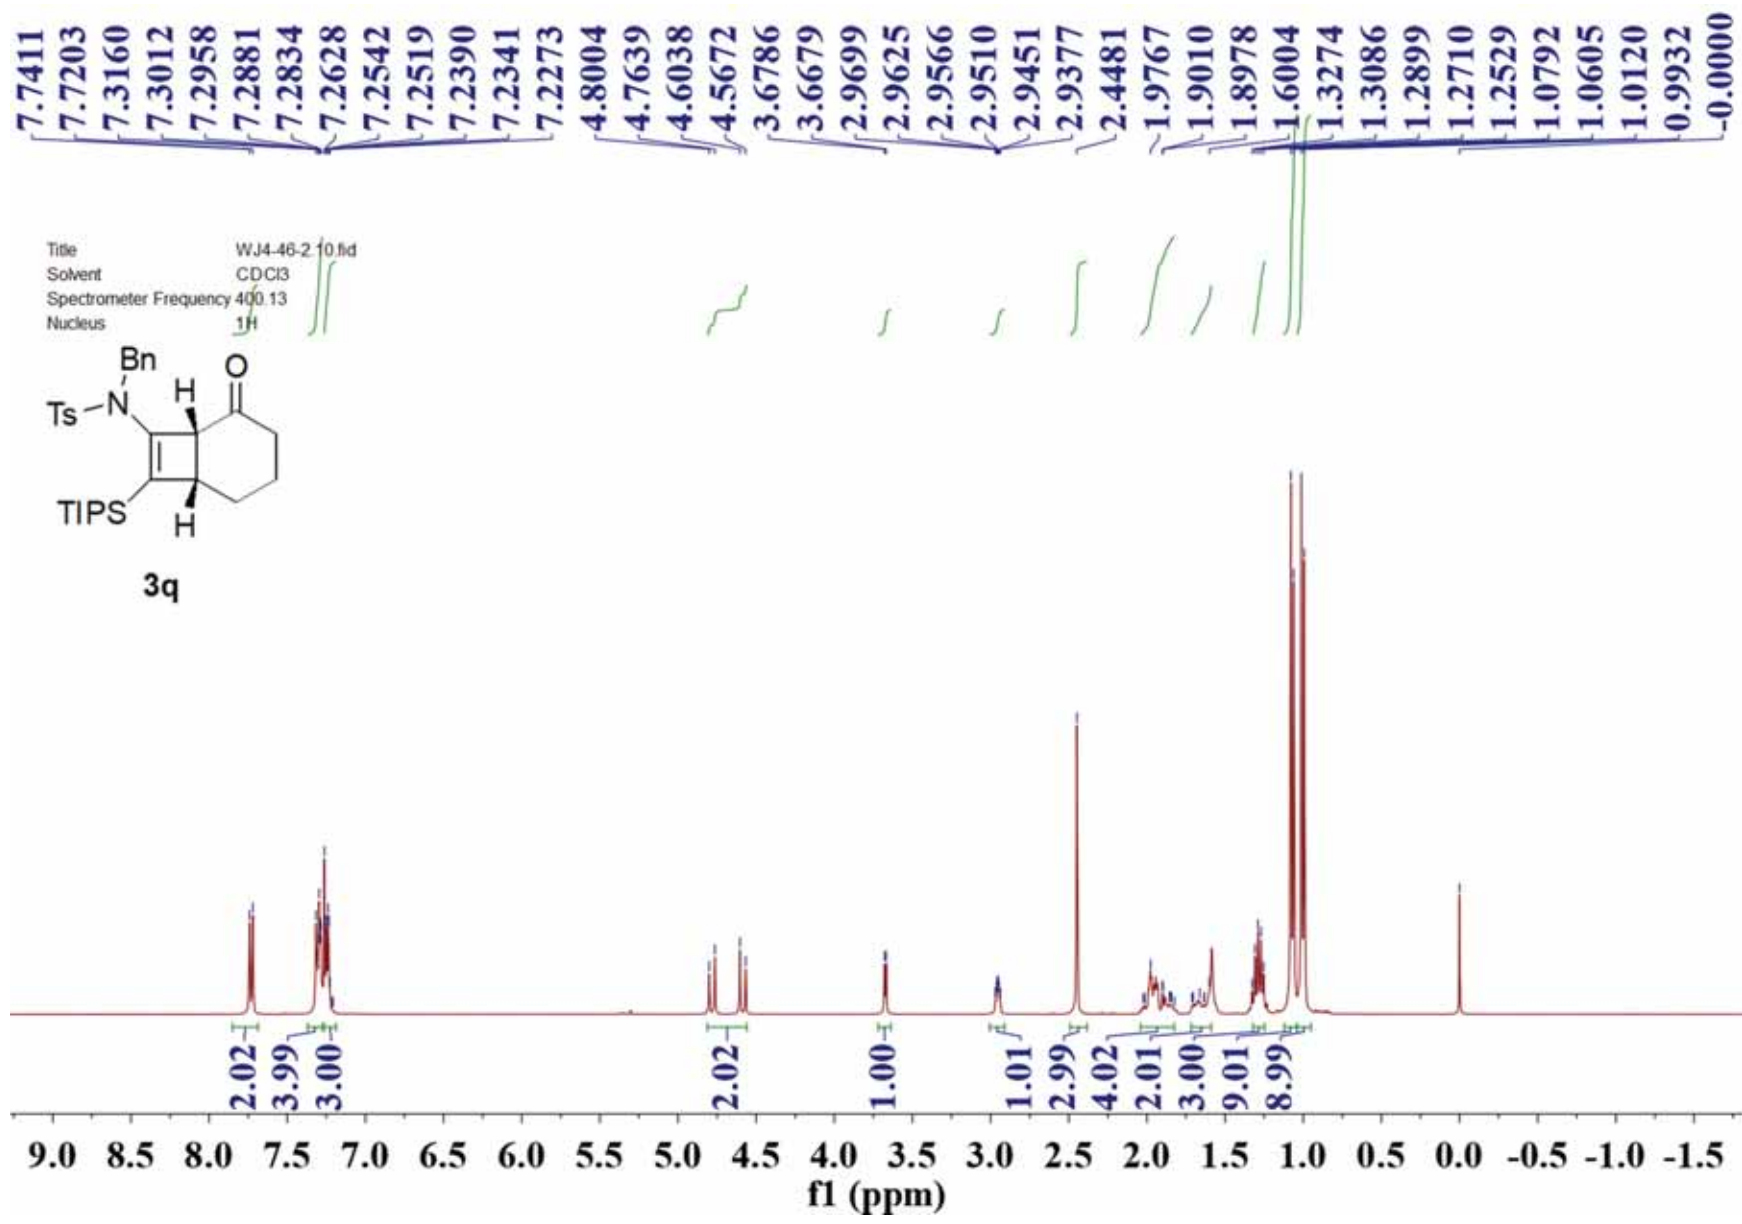

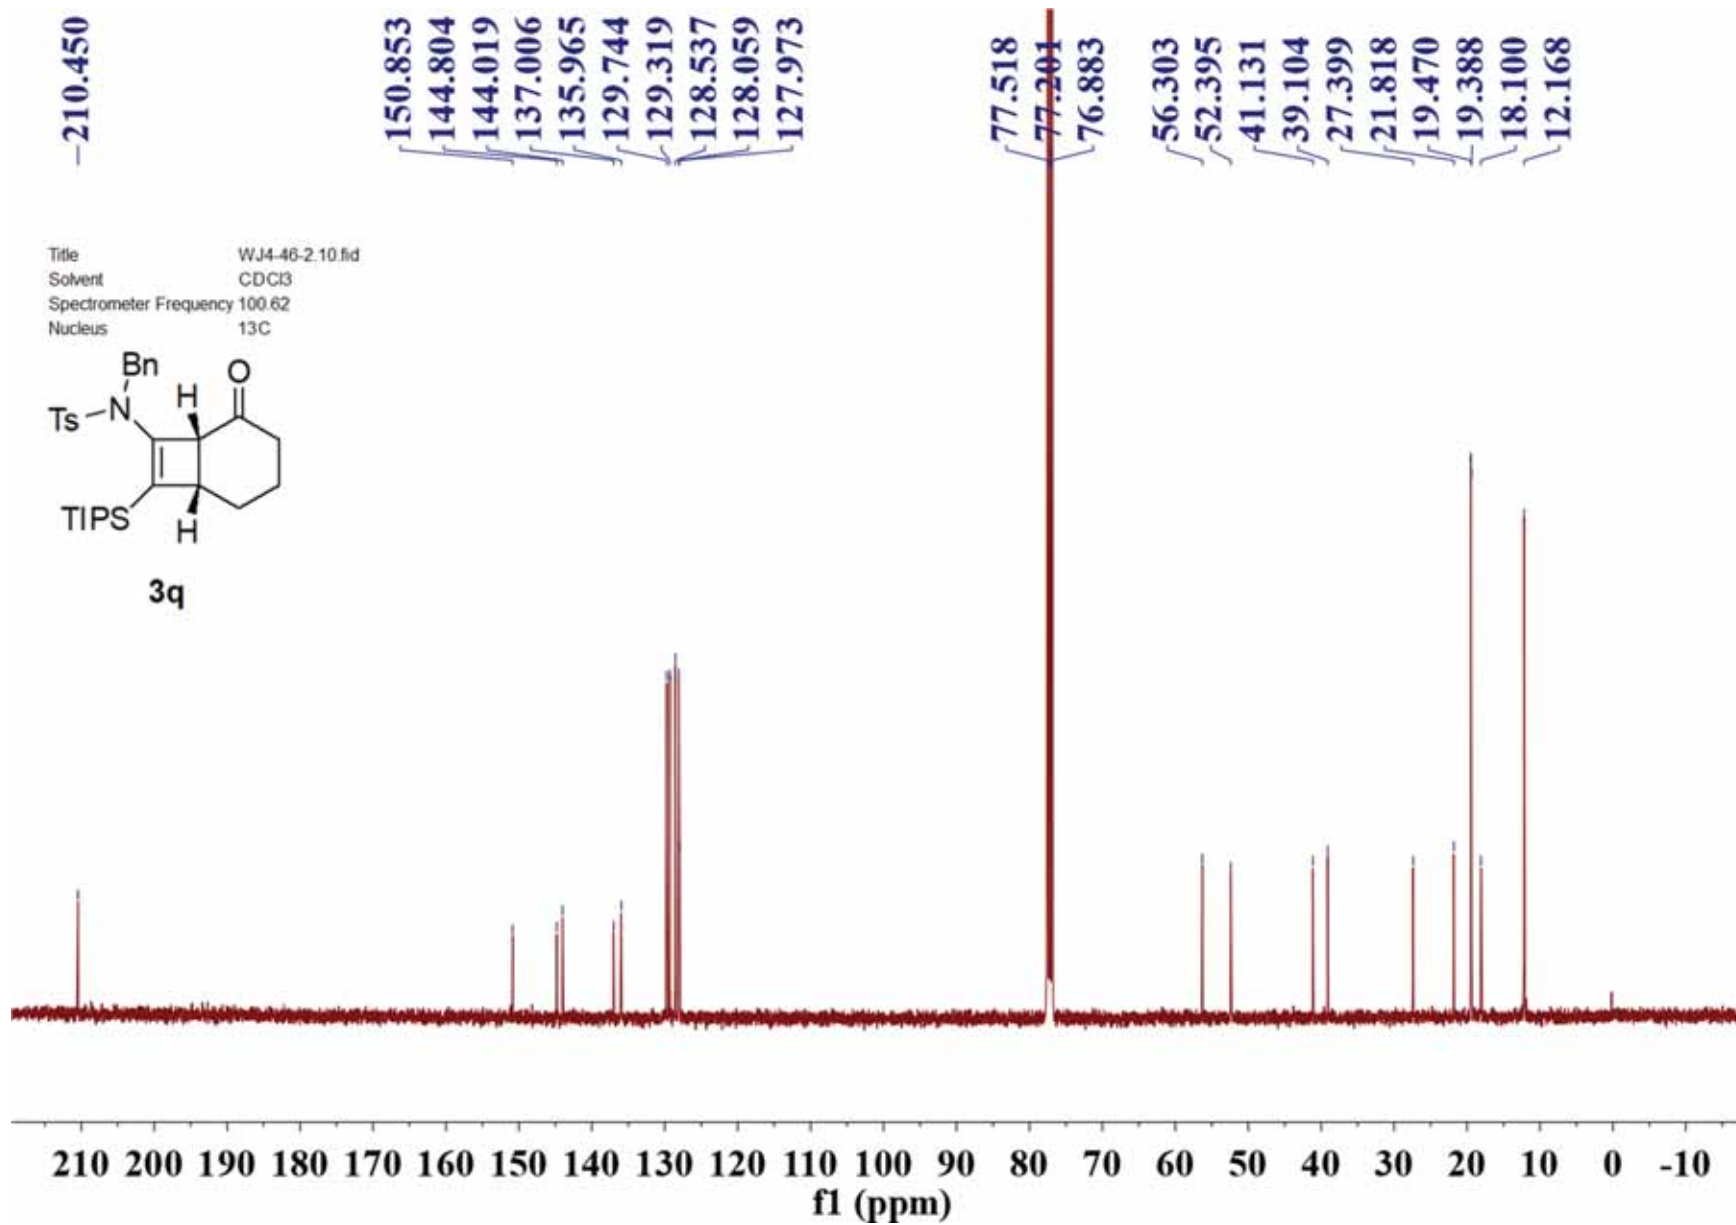

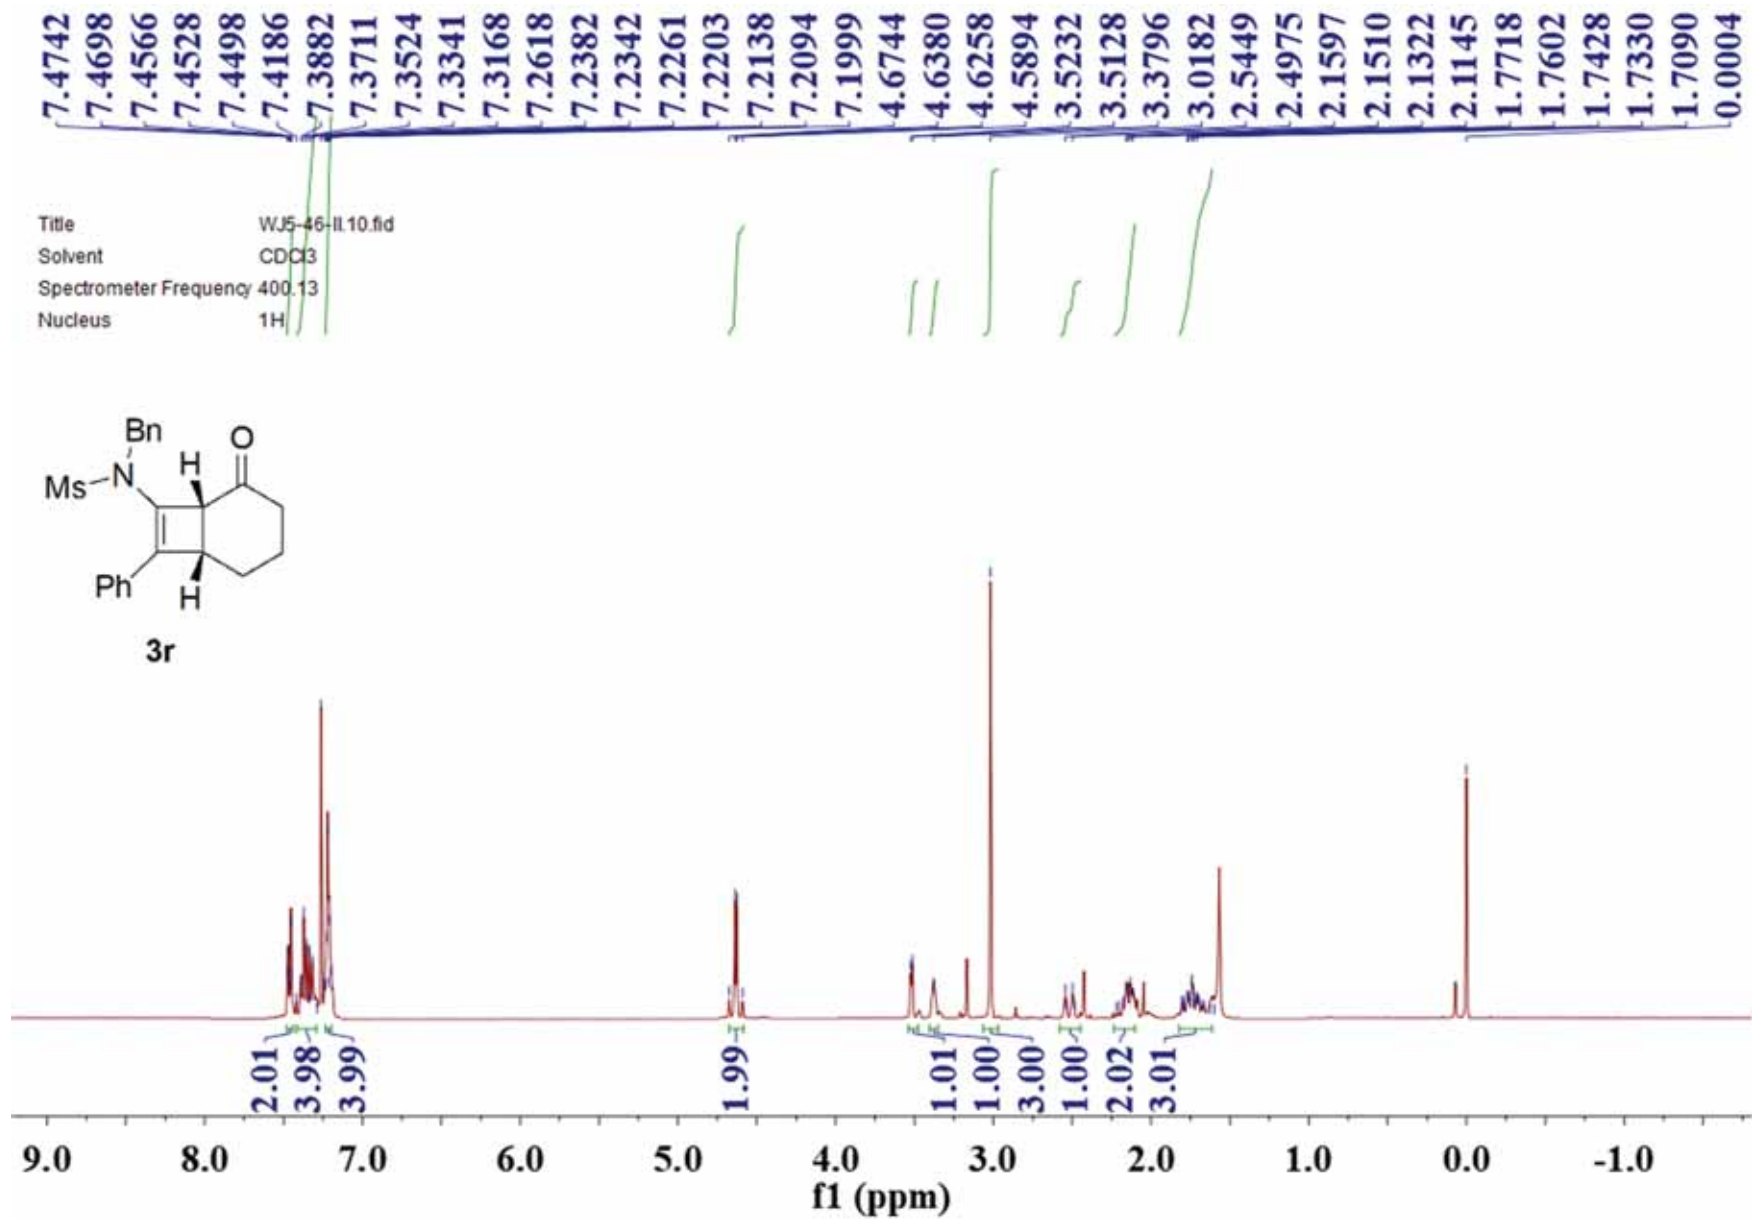

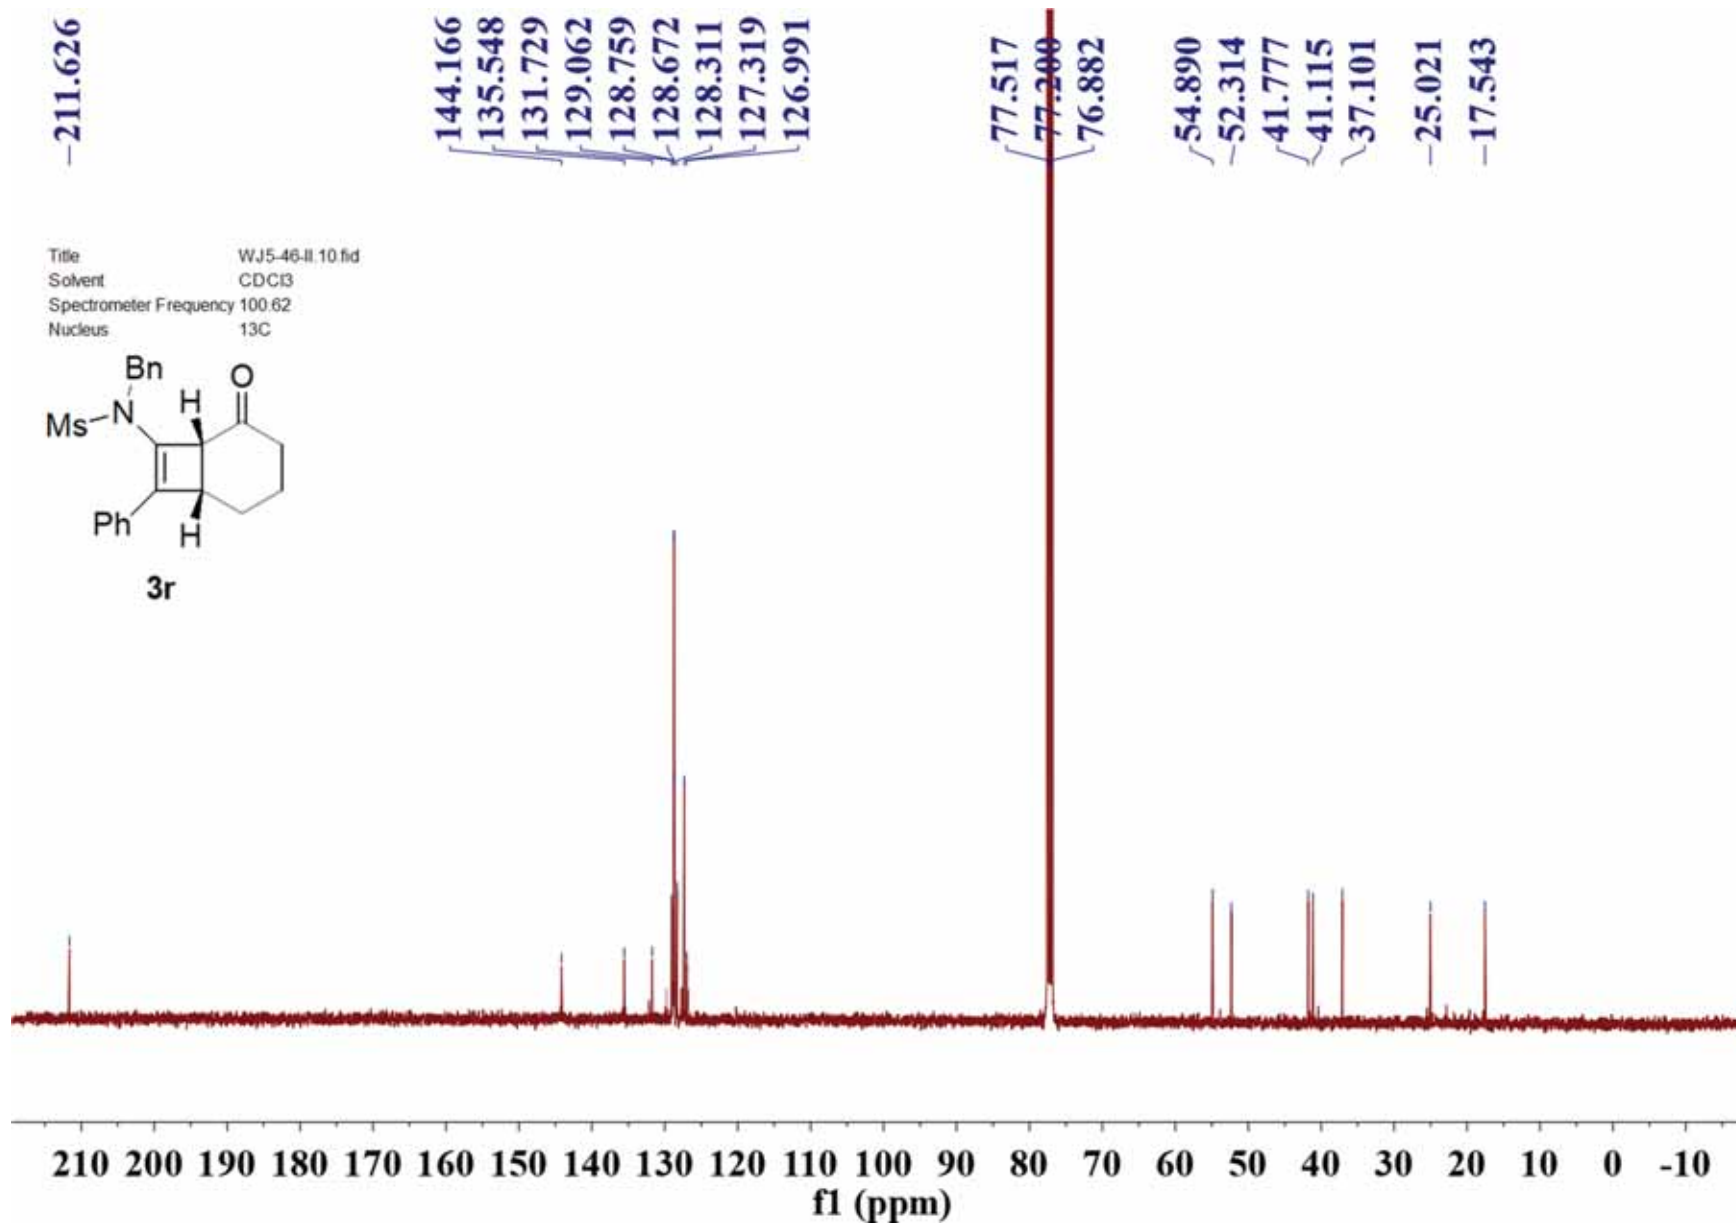

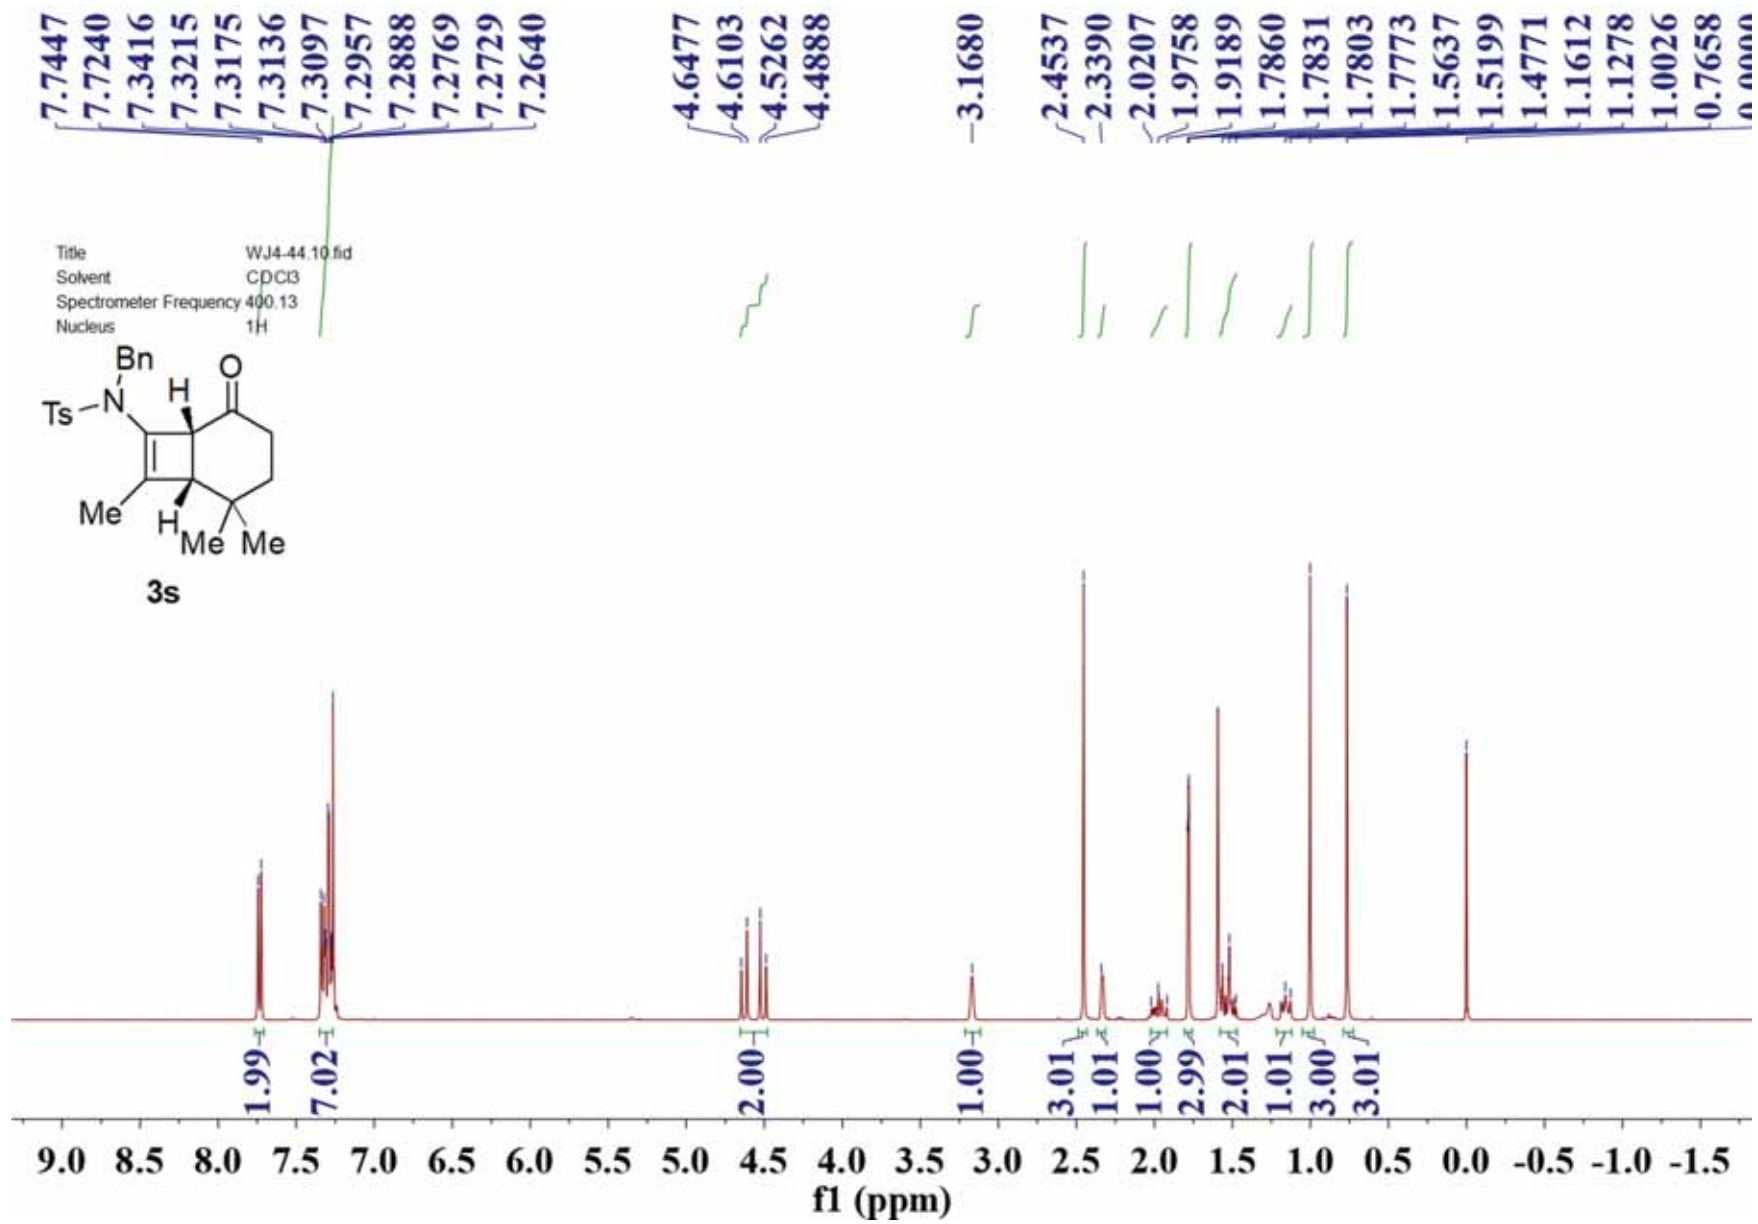

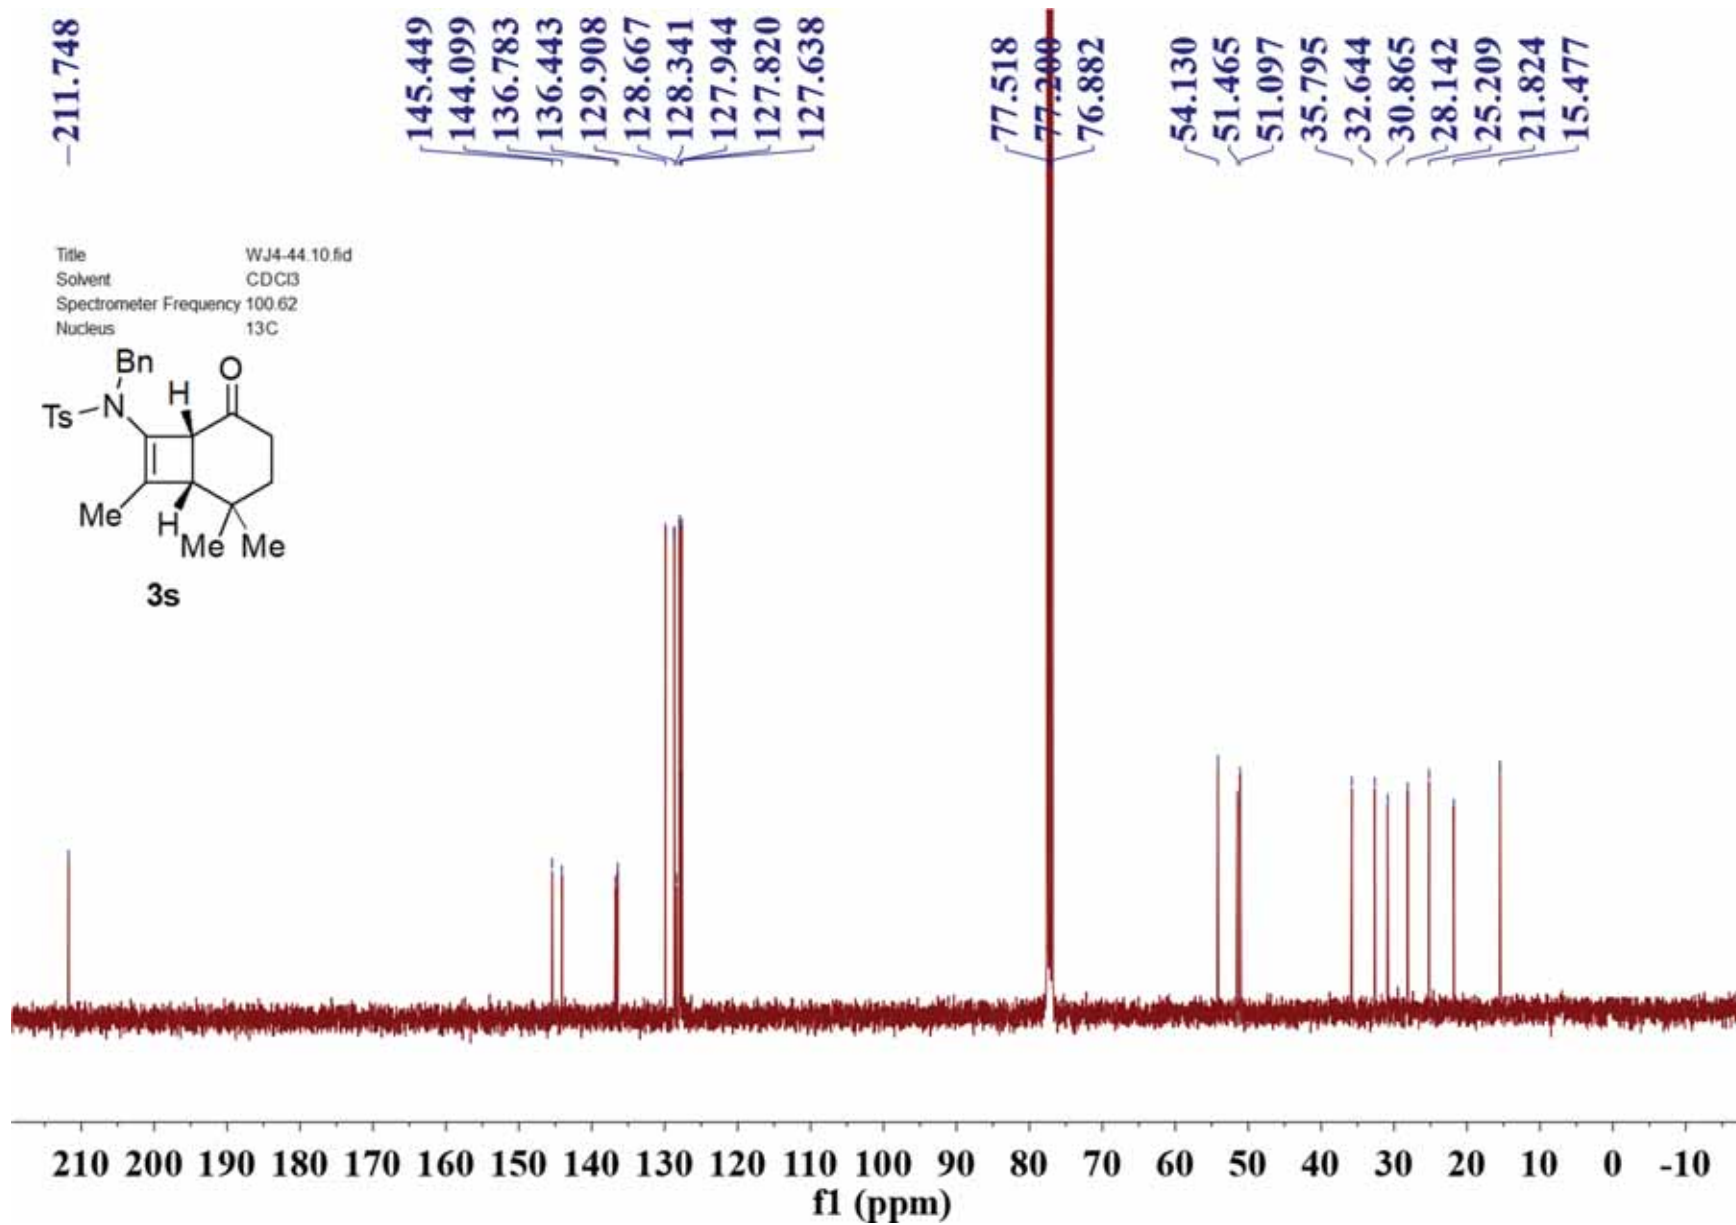

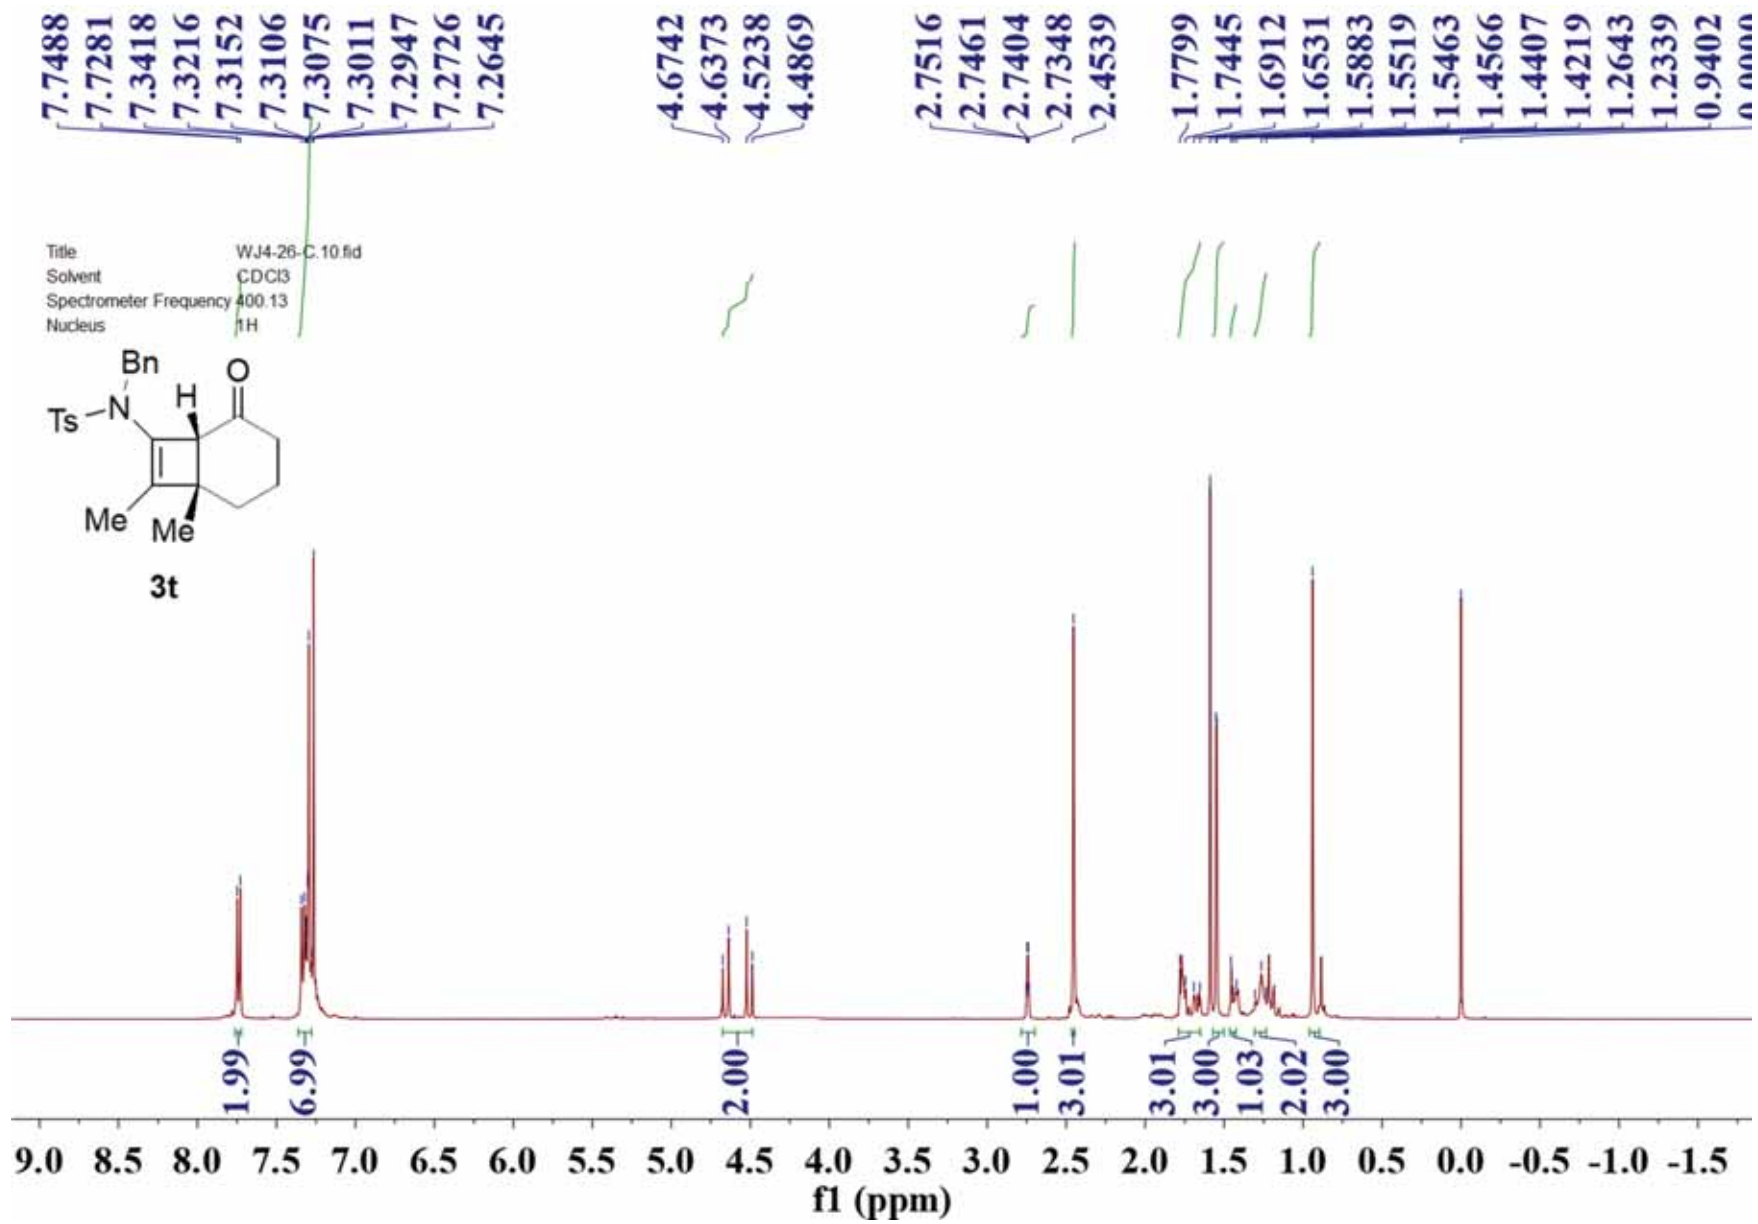

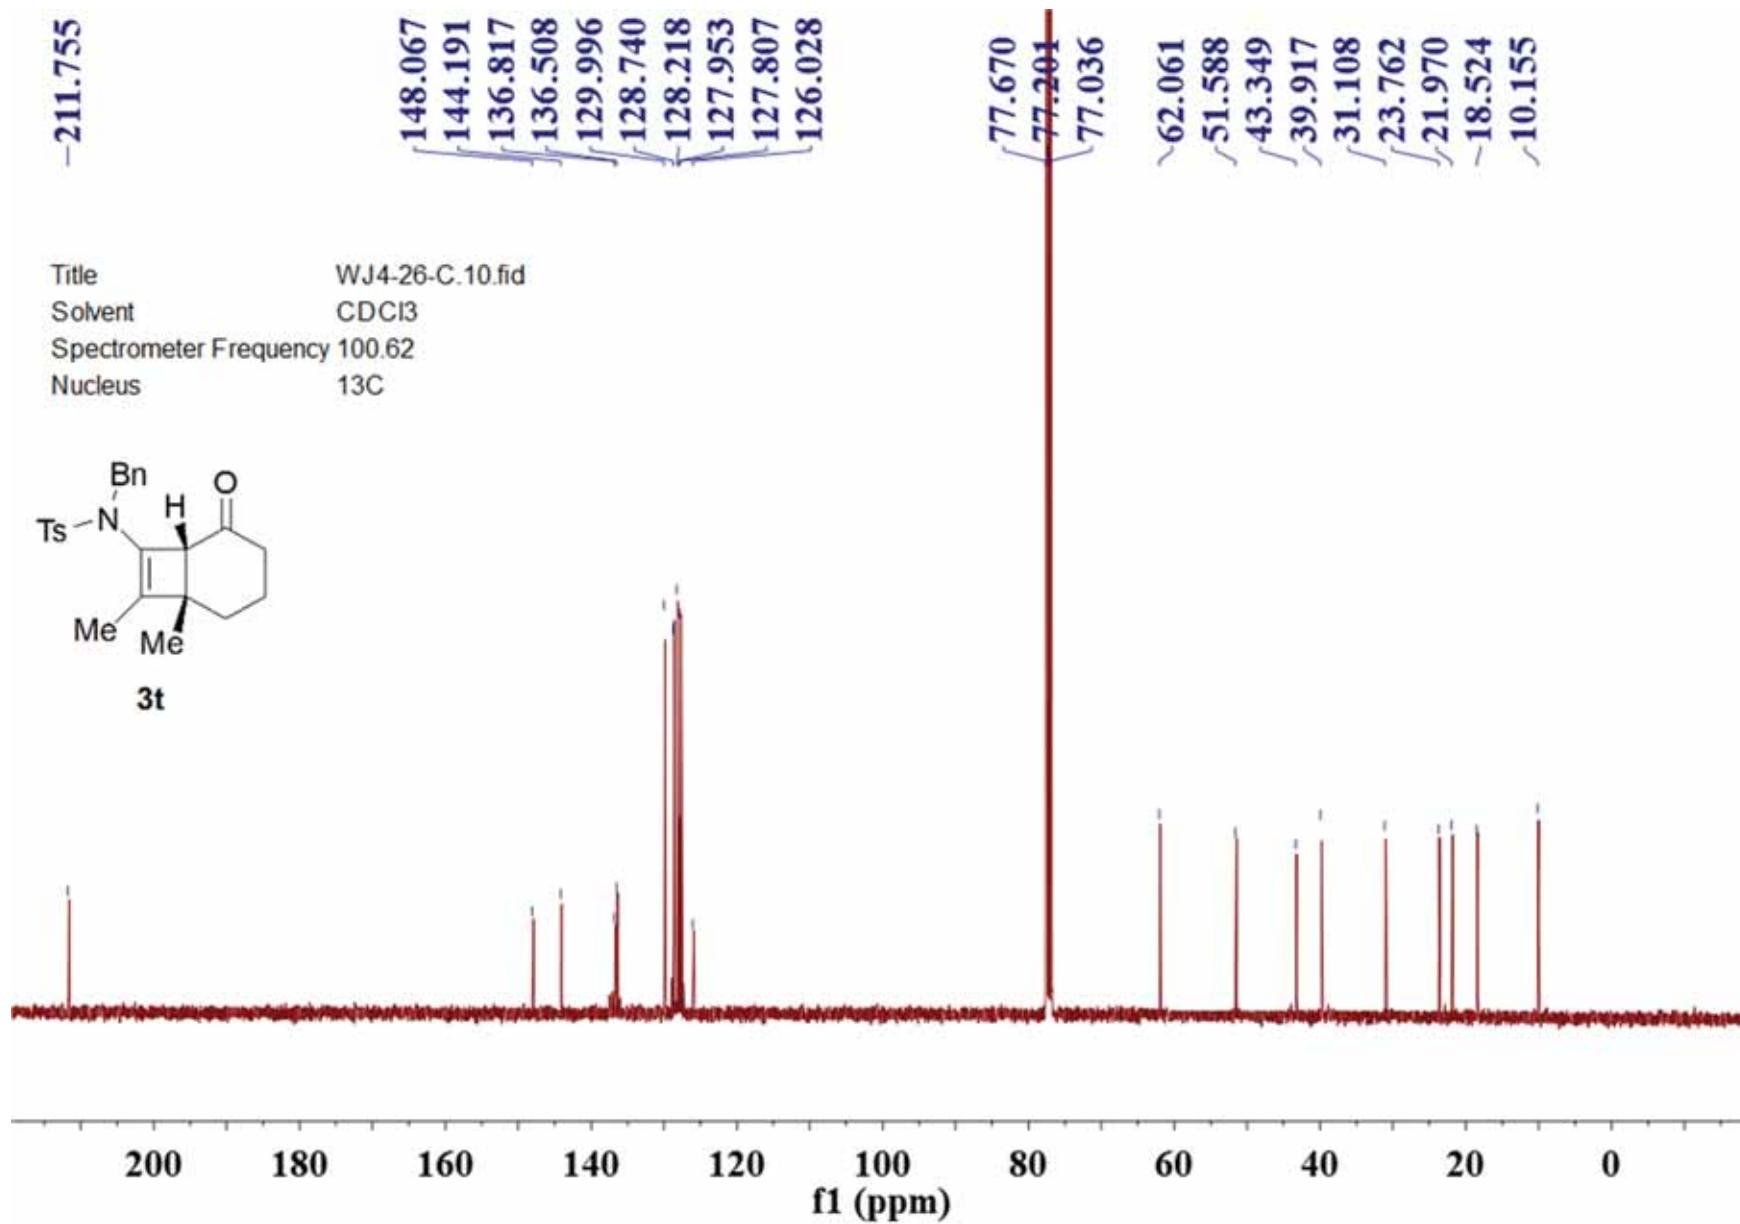



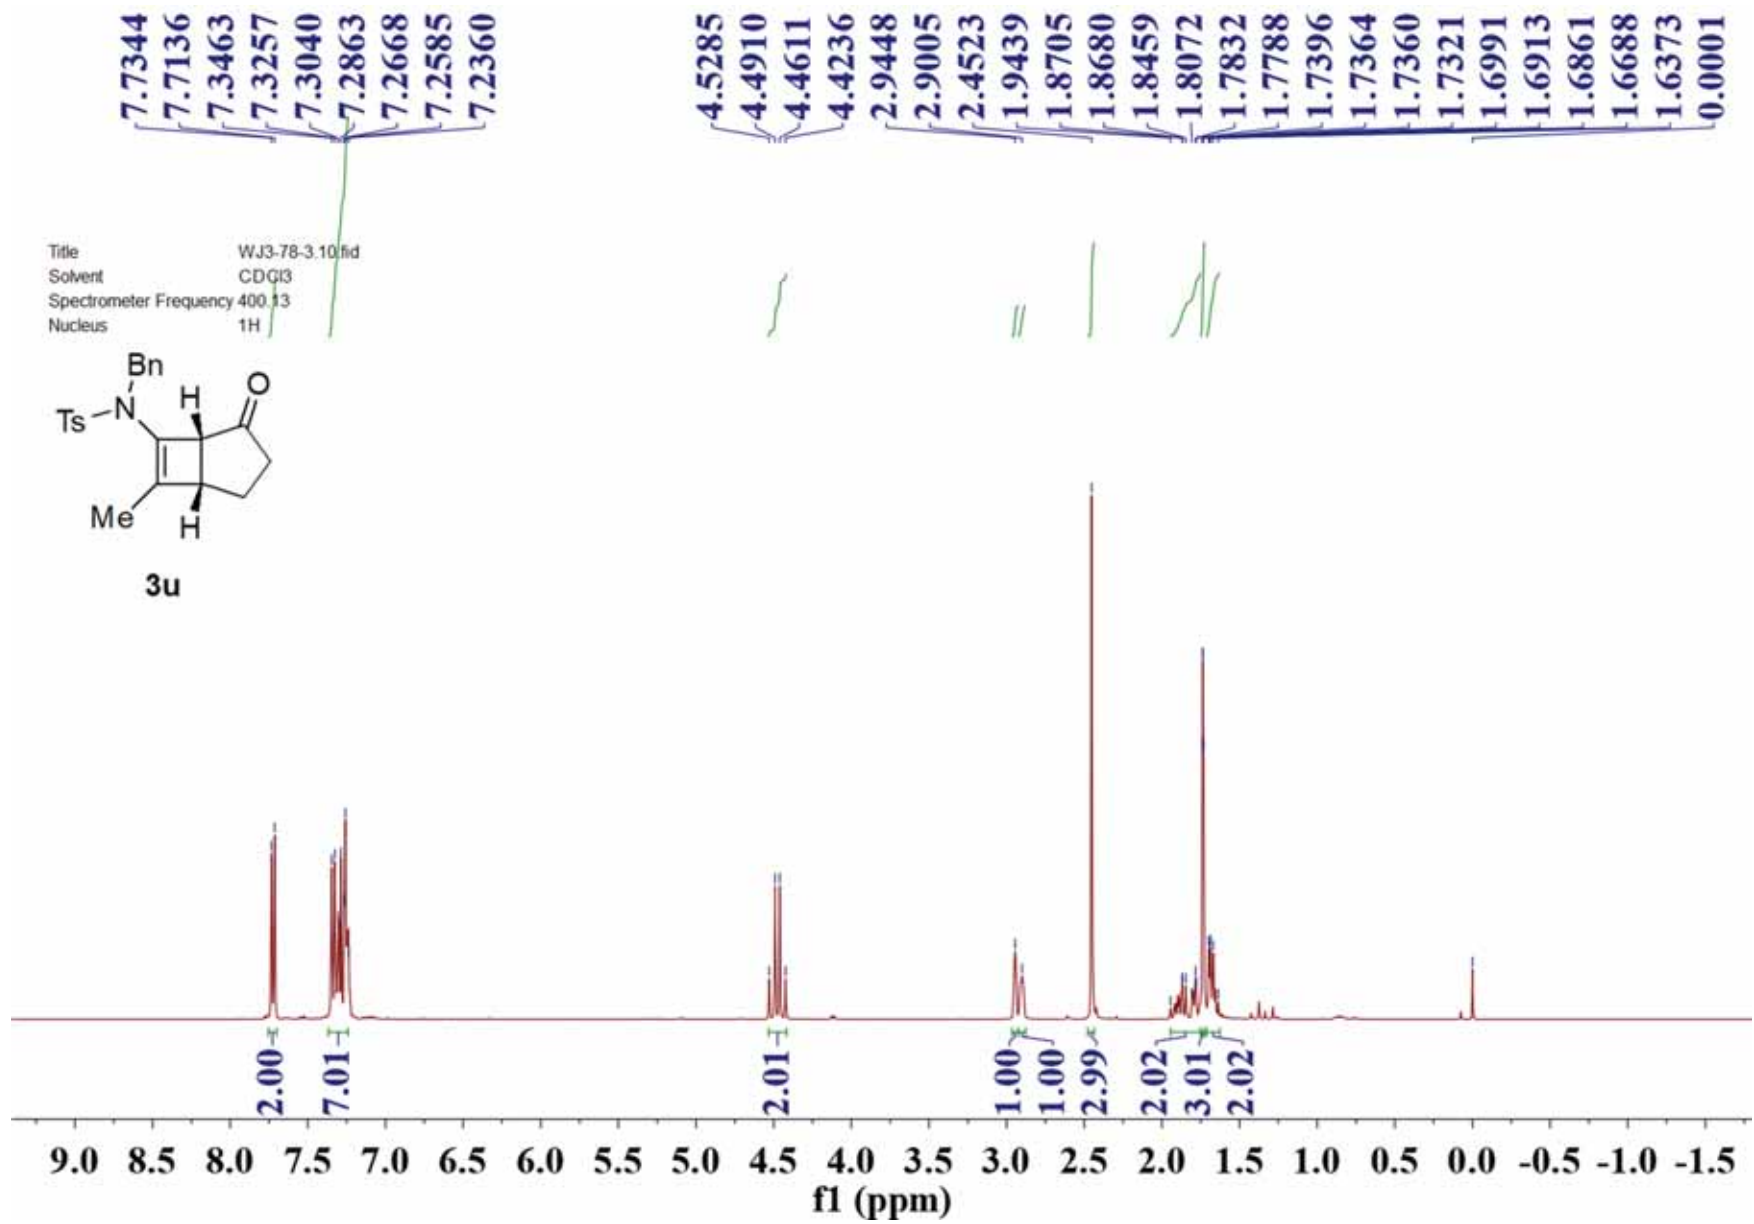

-216.016

144.325  
144.158  
136.487  
136.188  
129.993  
129.203  
128.649  
127.923  
127.822  
127.533

77.517  
77.200  
76.883

54.274  
51.254  
40.239  
34.115

21.818  
19.922  
13.074

Title WJ3-78C.10.fid  
Solvent CDCl3  
Spectrometer Frequency 100.62  
Nucleus 13C

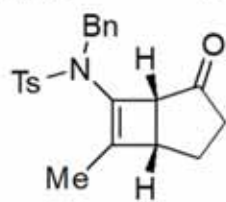

3u

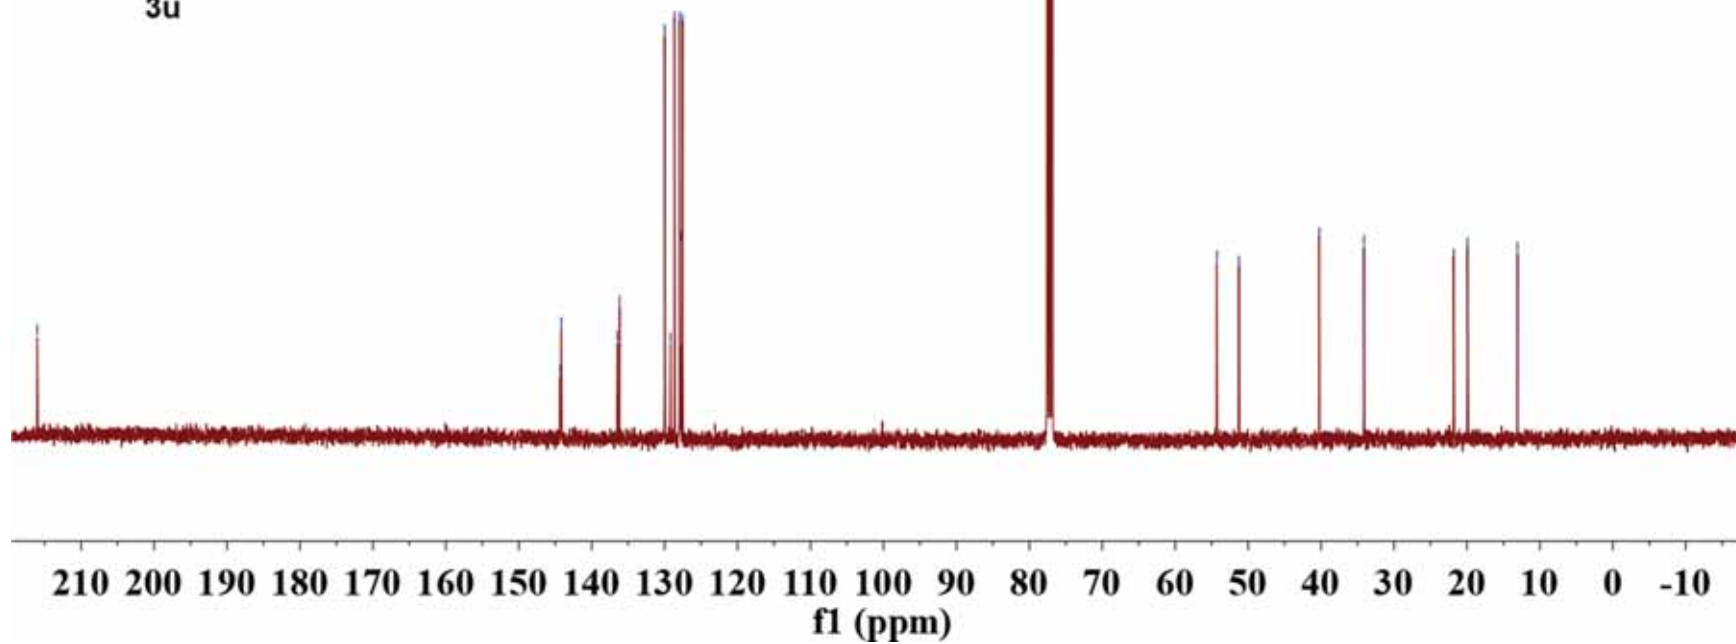

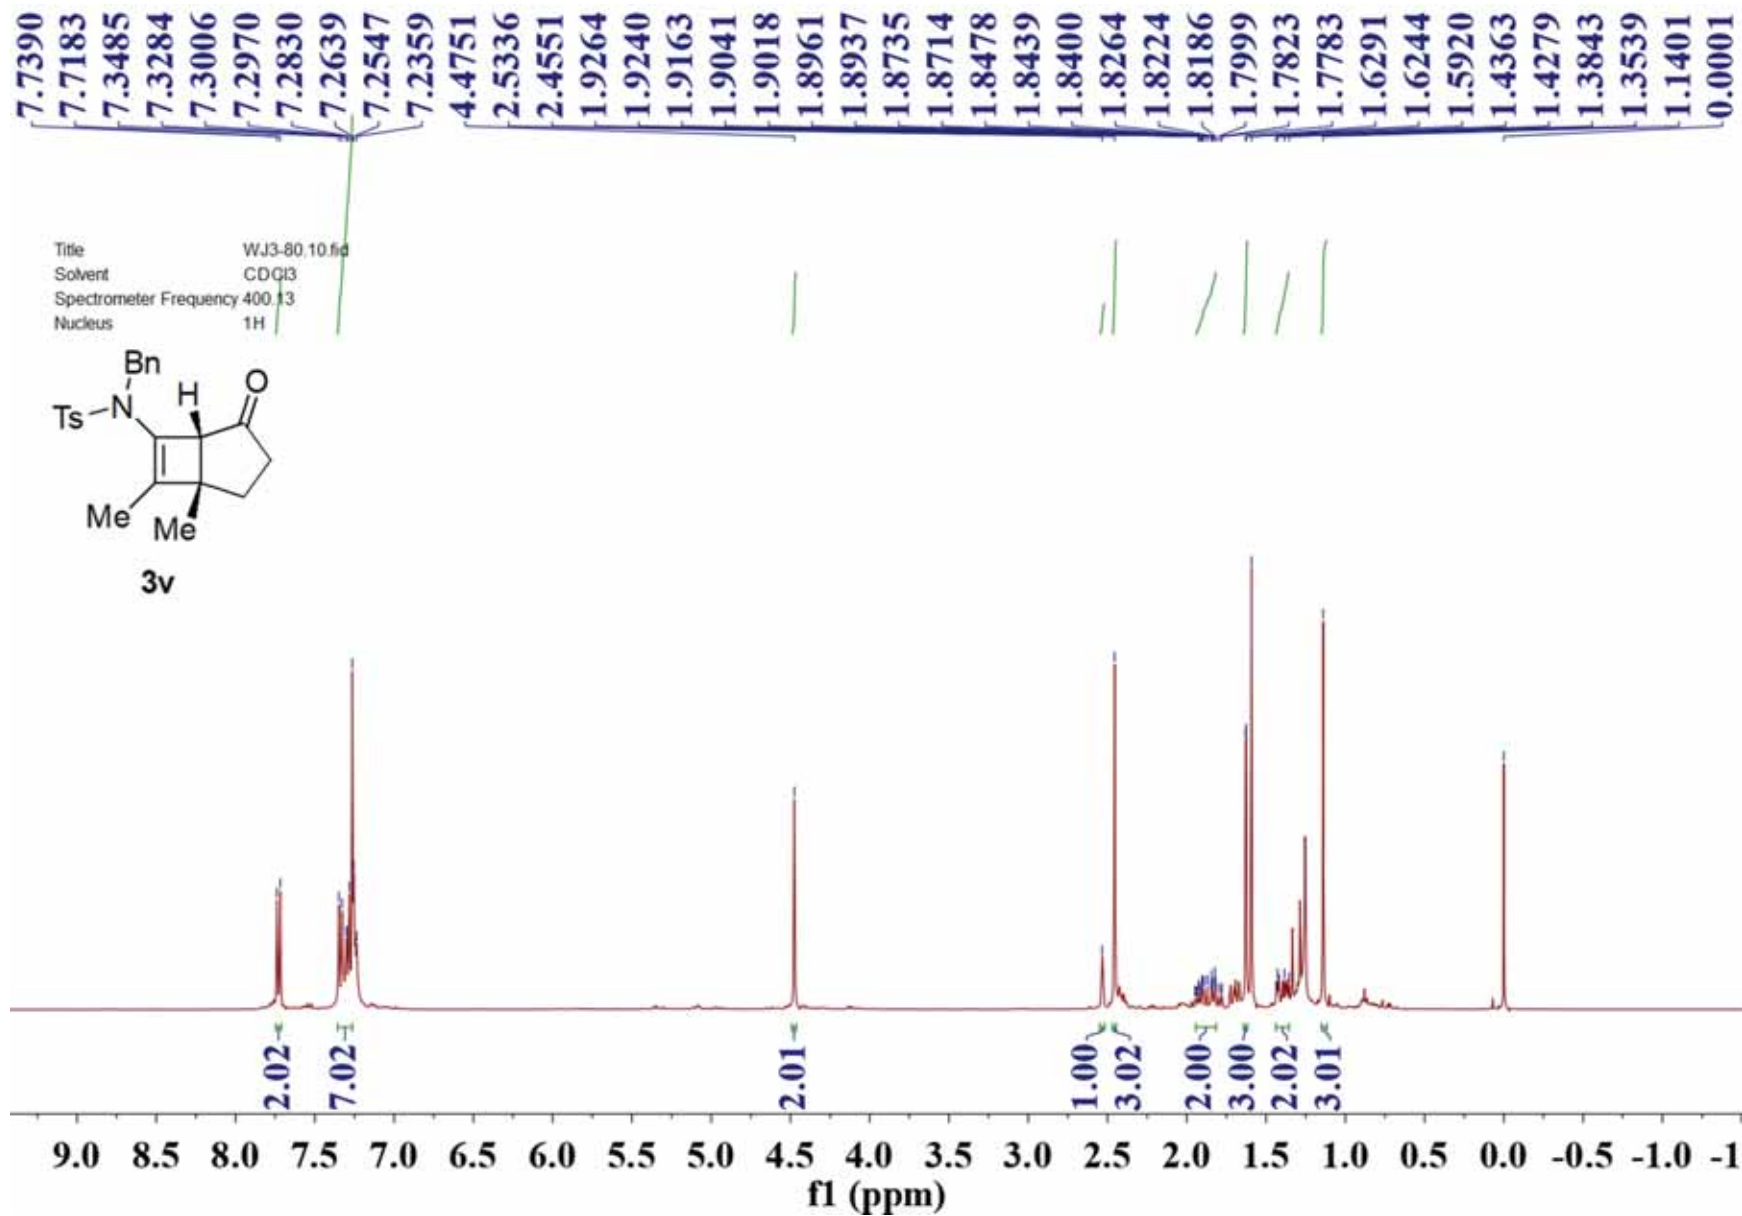

-216.301

147.657  
144.143  
136.401  
136.118  
129.944  
128.617  
128.387  
127.974  
127.837  
127.564

77.518  
77.200  
76.884

61.059  
51.365  
46.205  
35.961  
26.895  
21.810  
21.349  
10.439

Title WJ3-80.10.fid  
Solvent CDCl3  
Spectrometer Frequency 100.62  
Nucleus 13C

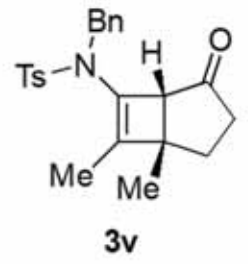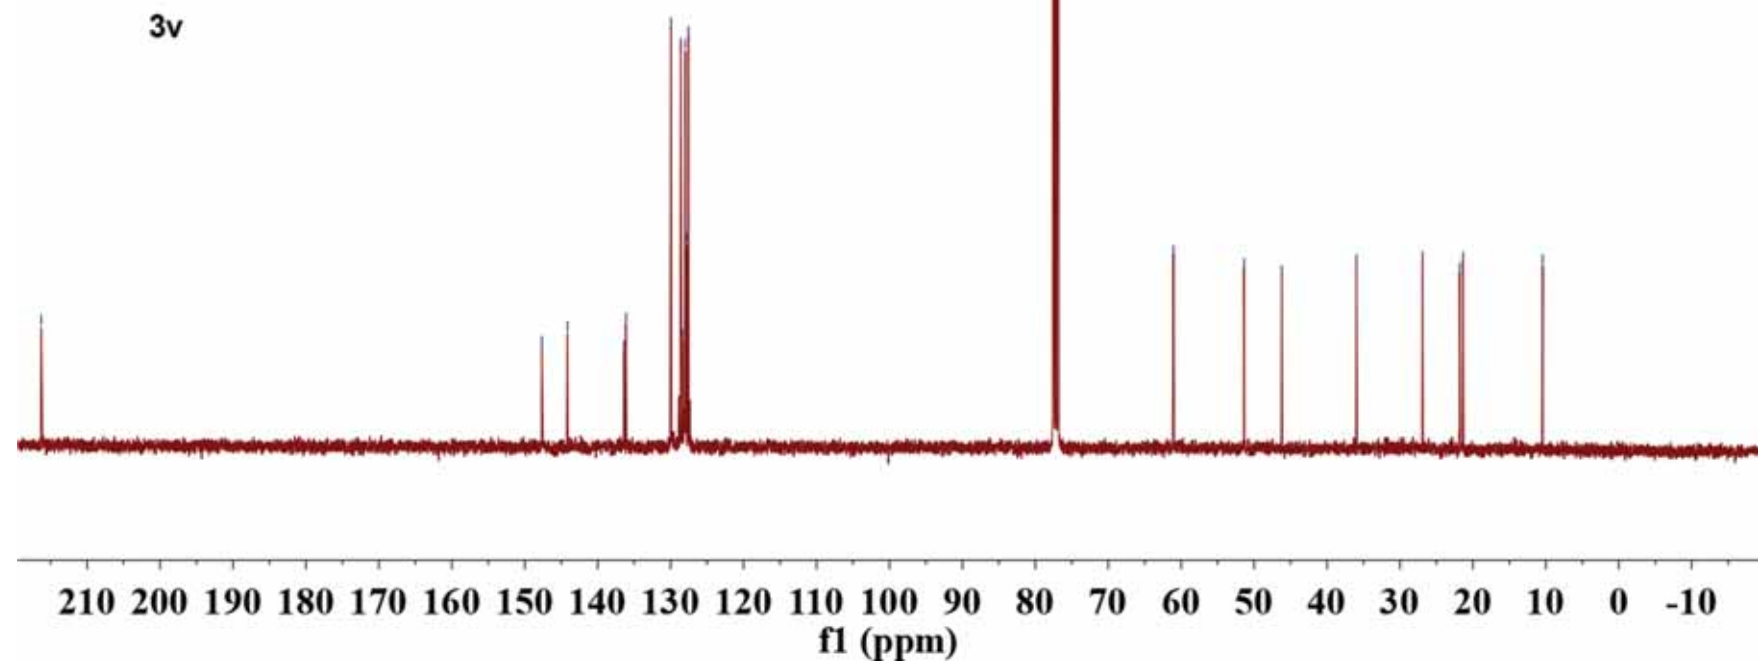

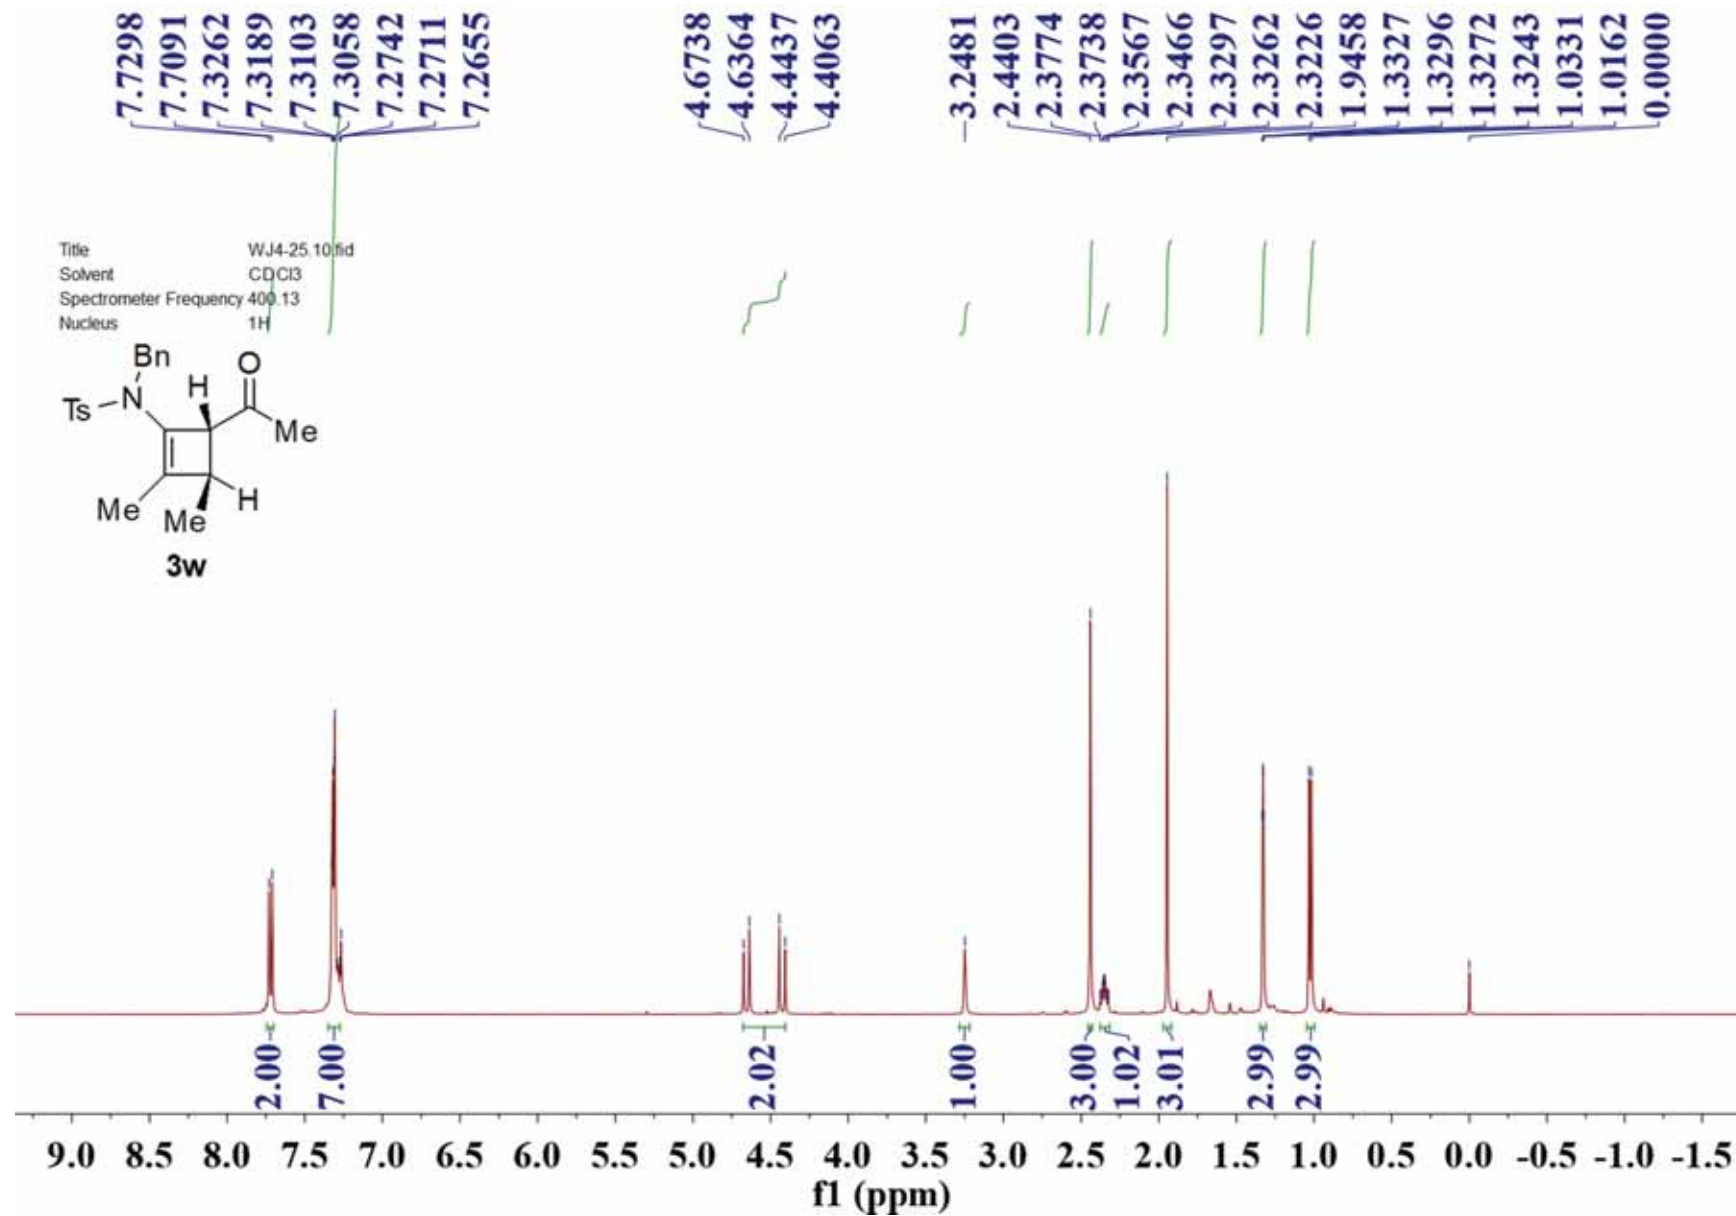

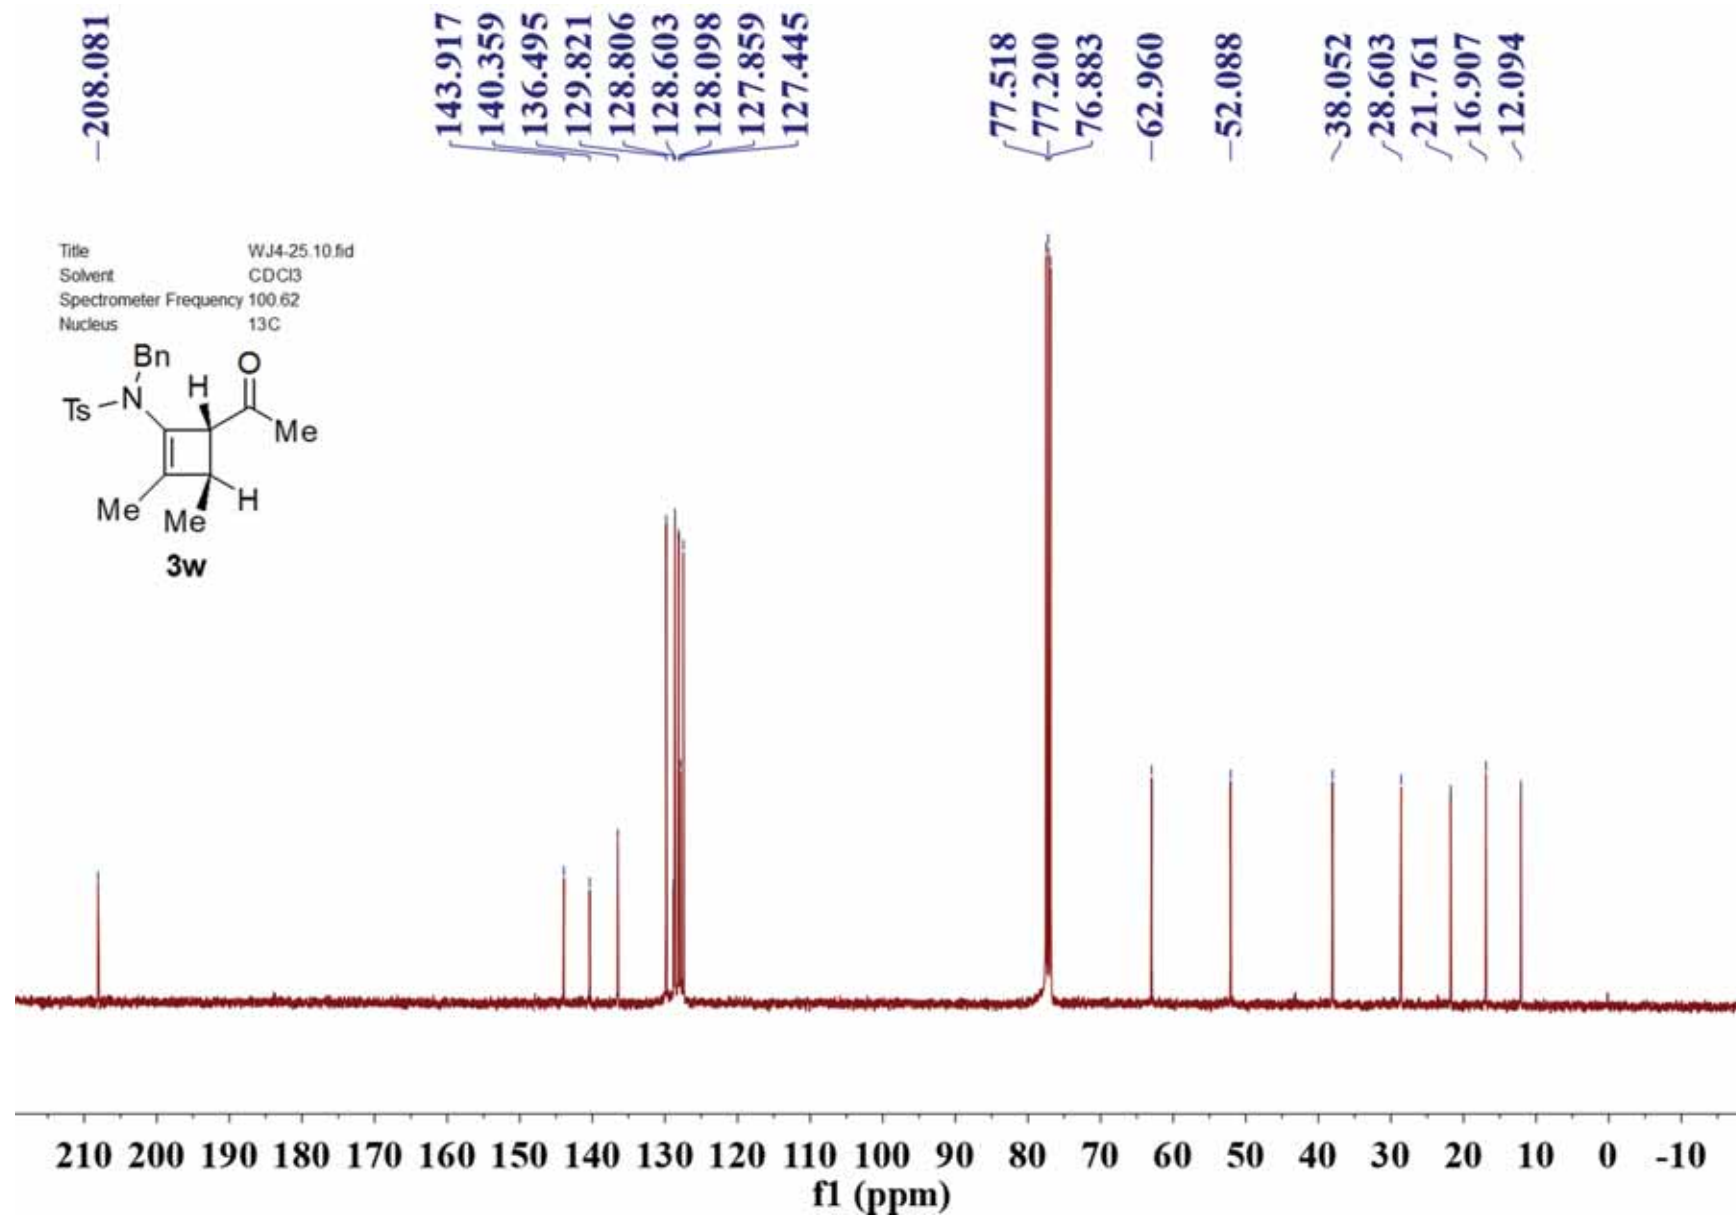

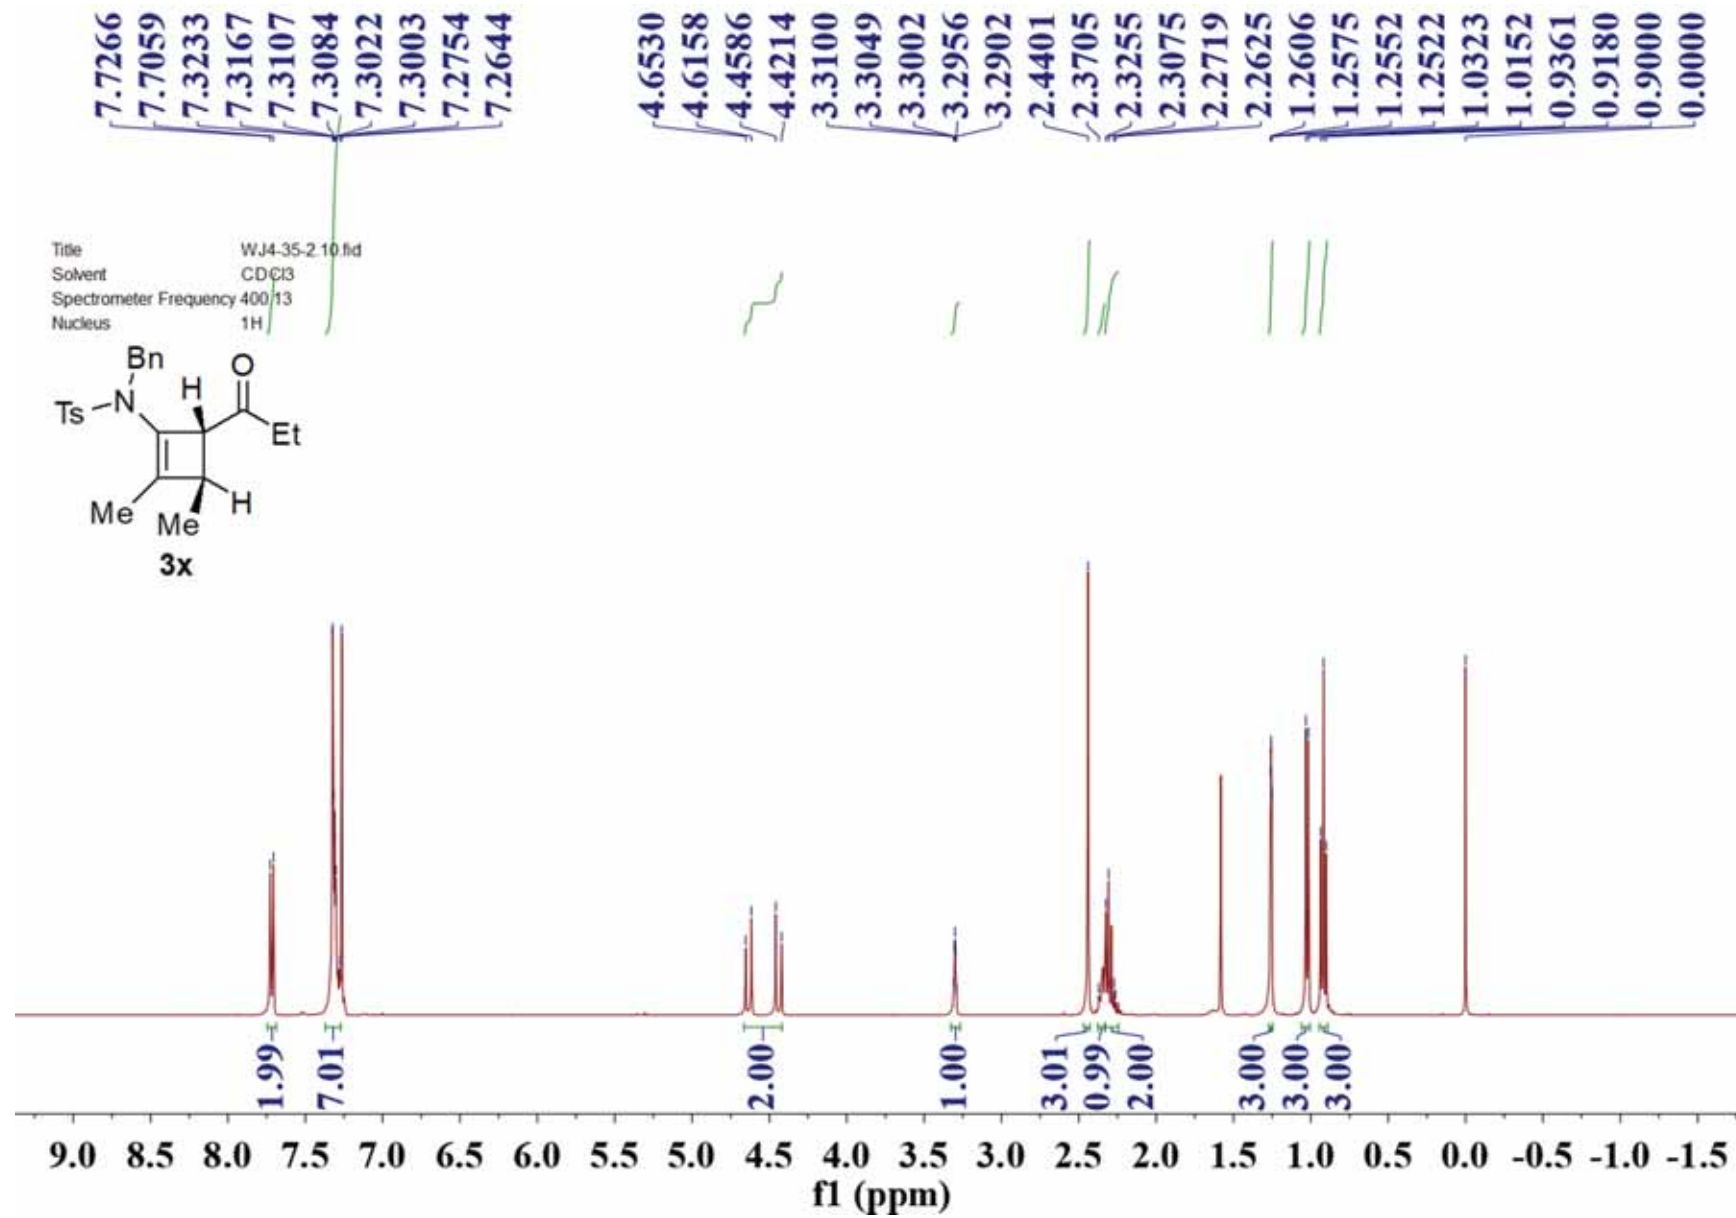

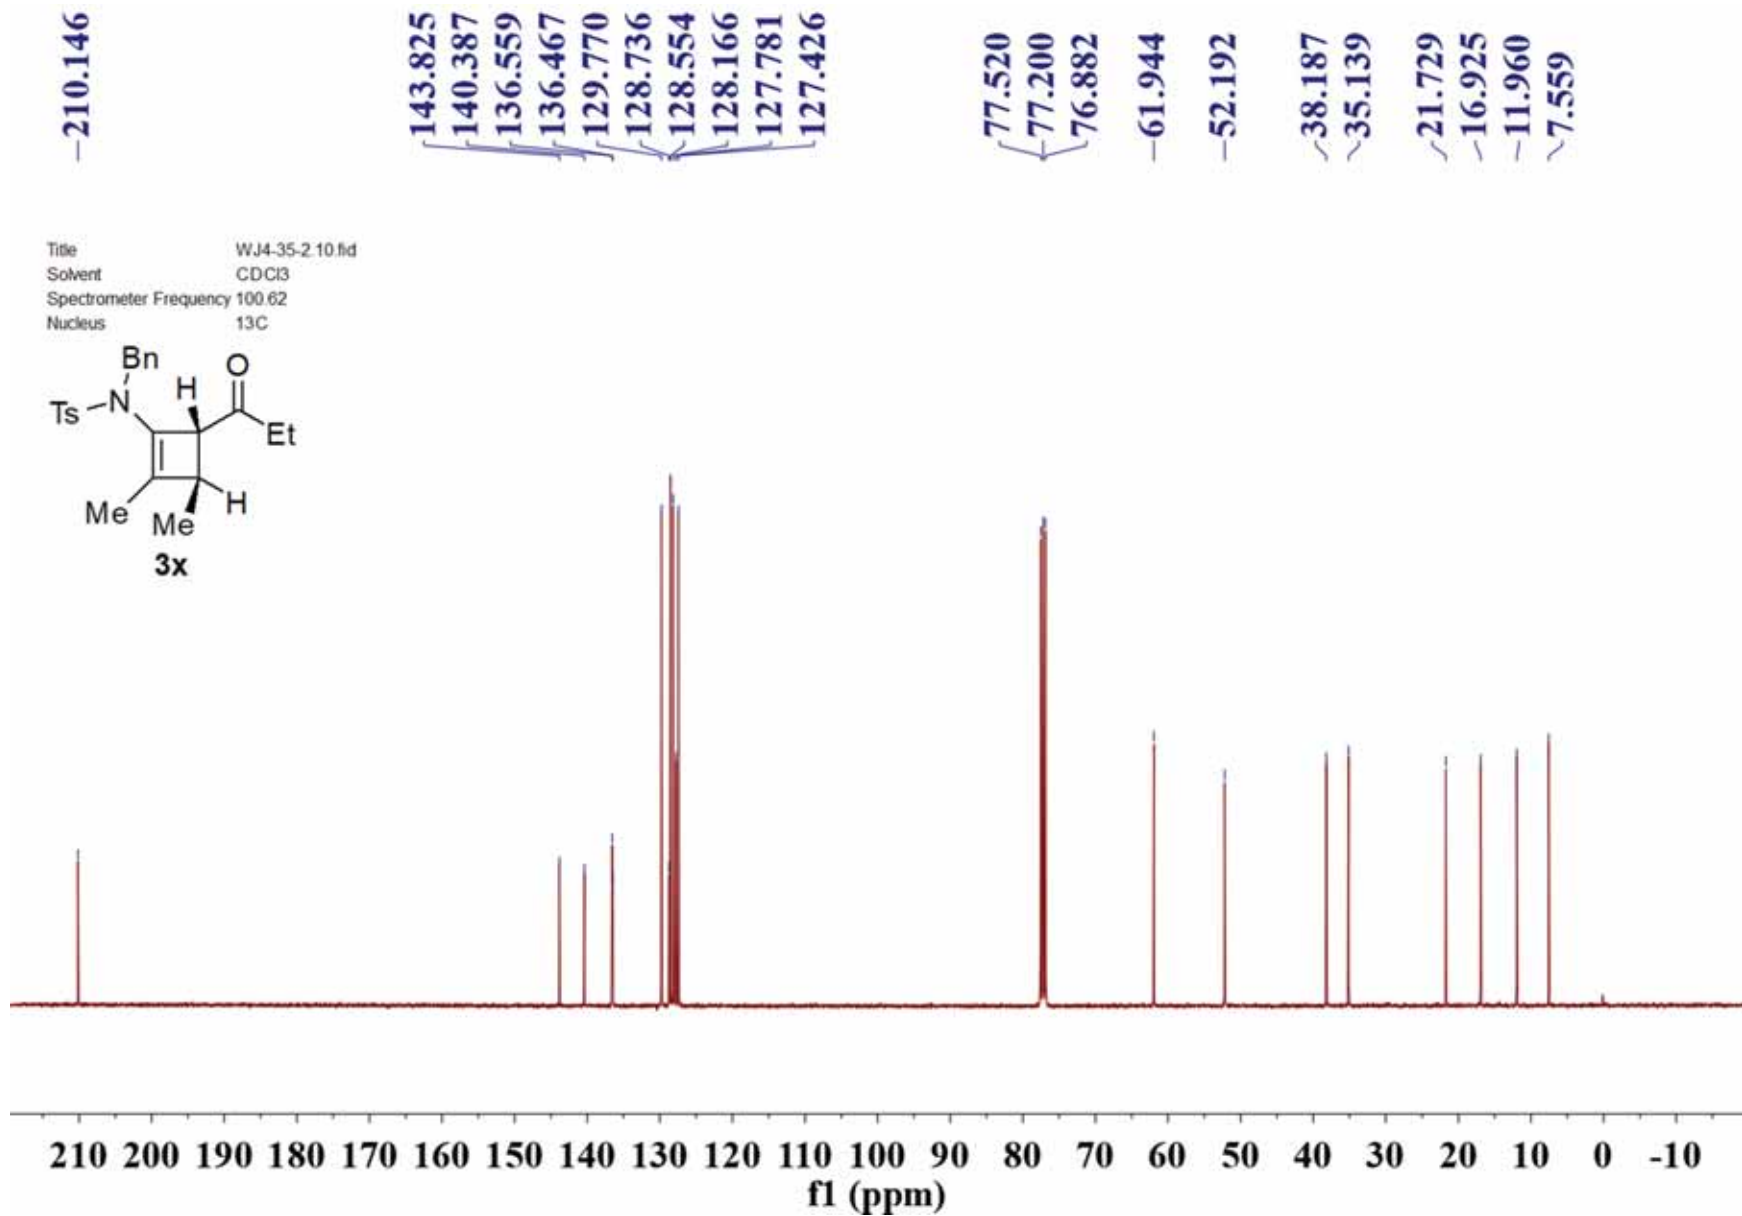



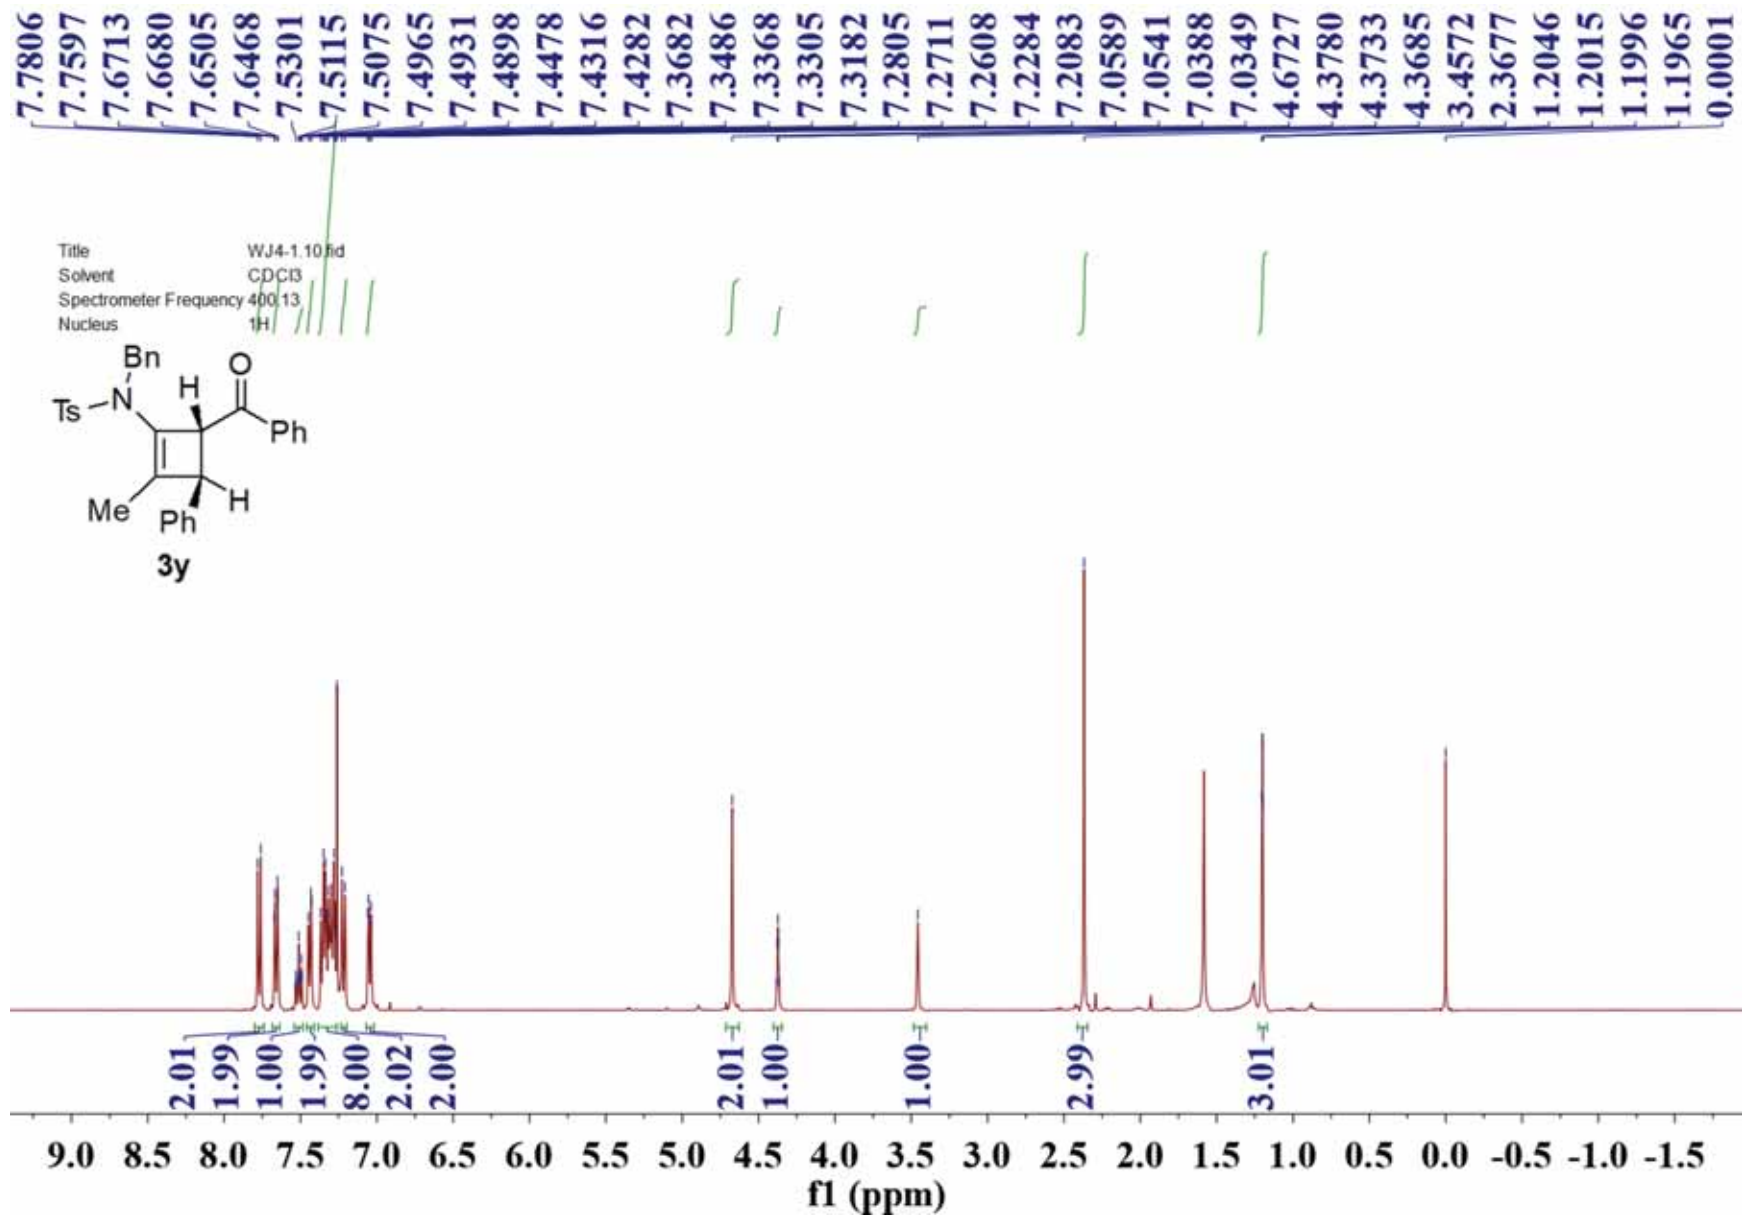

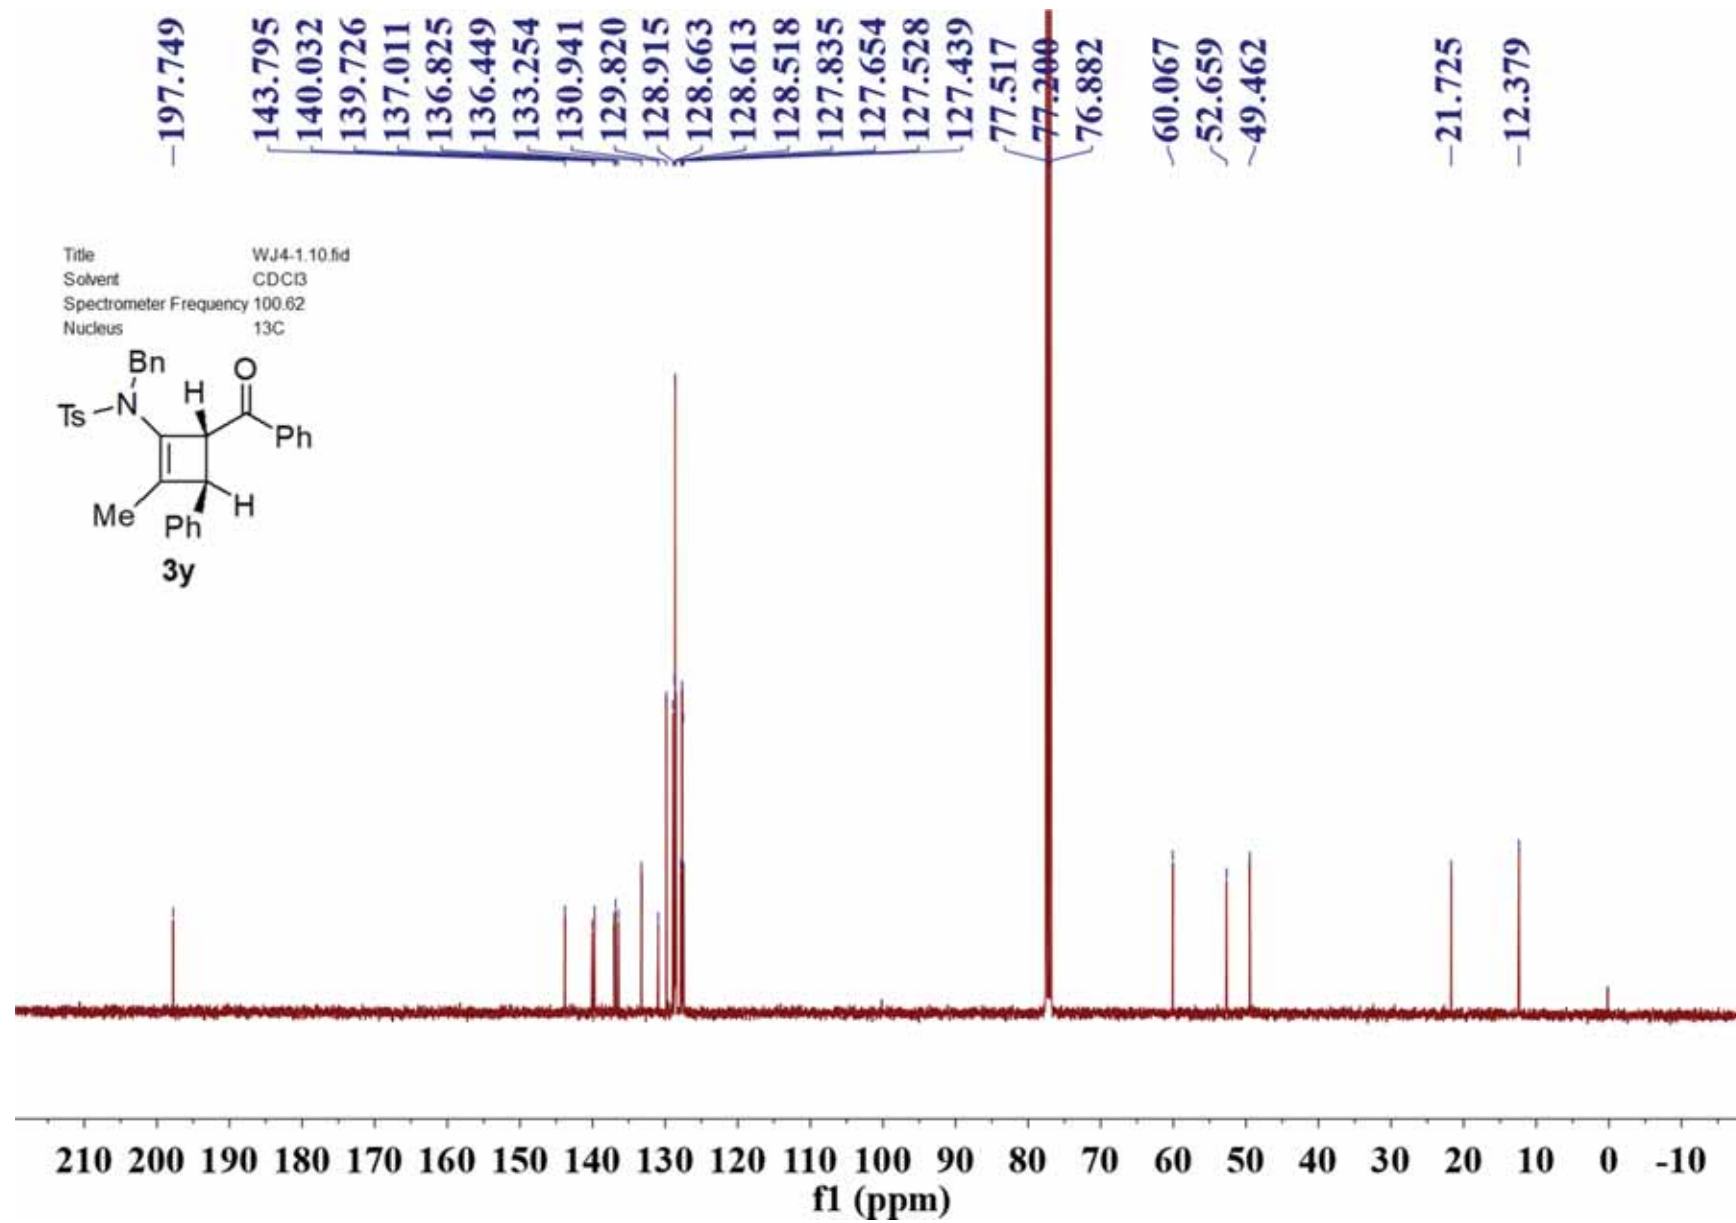

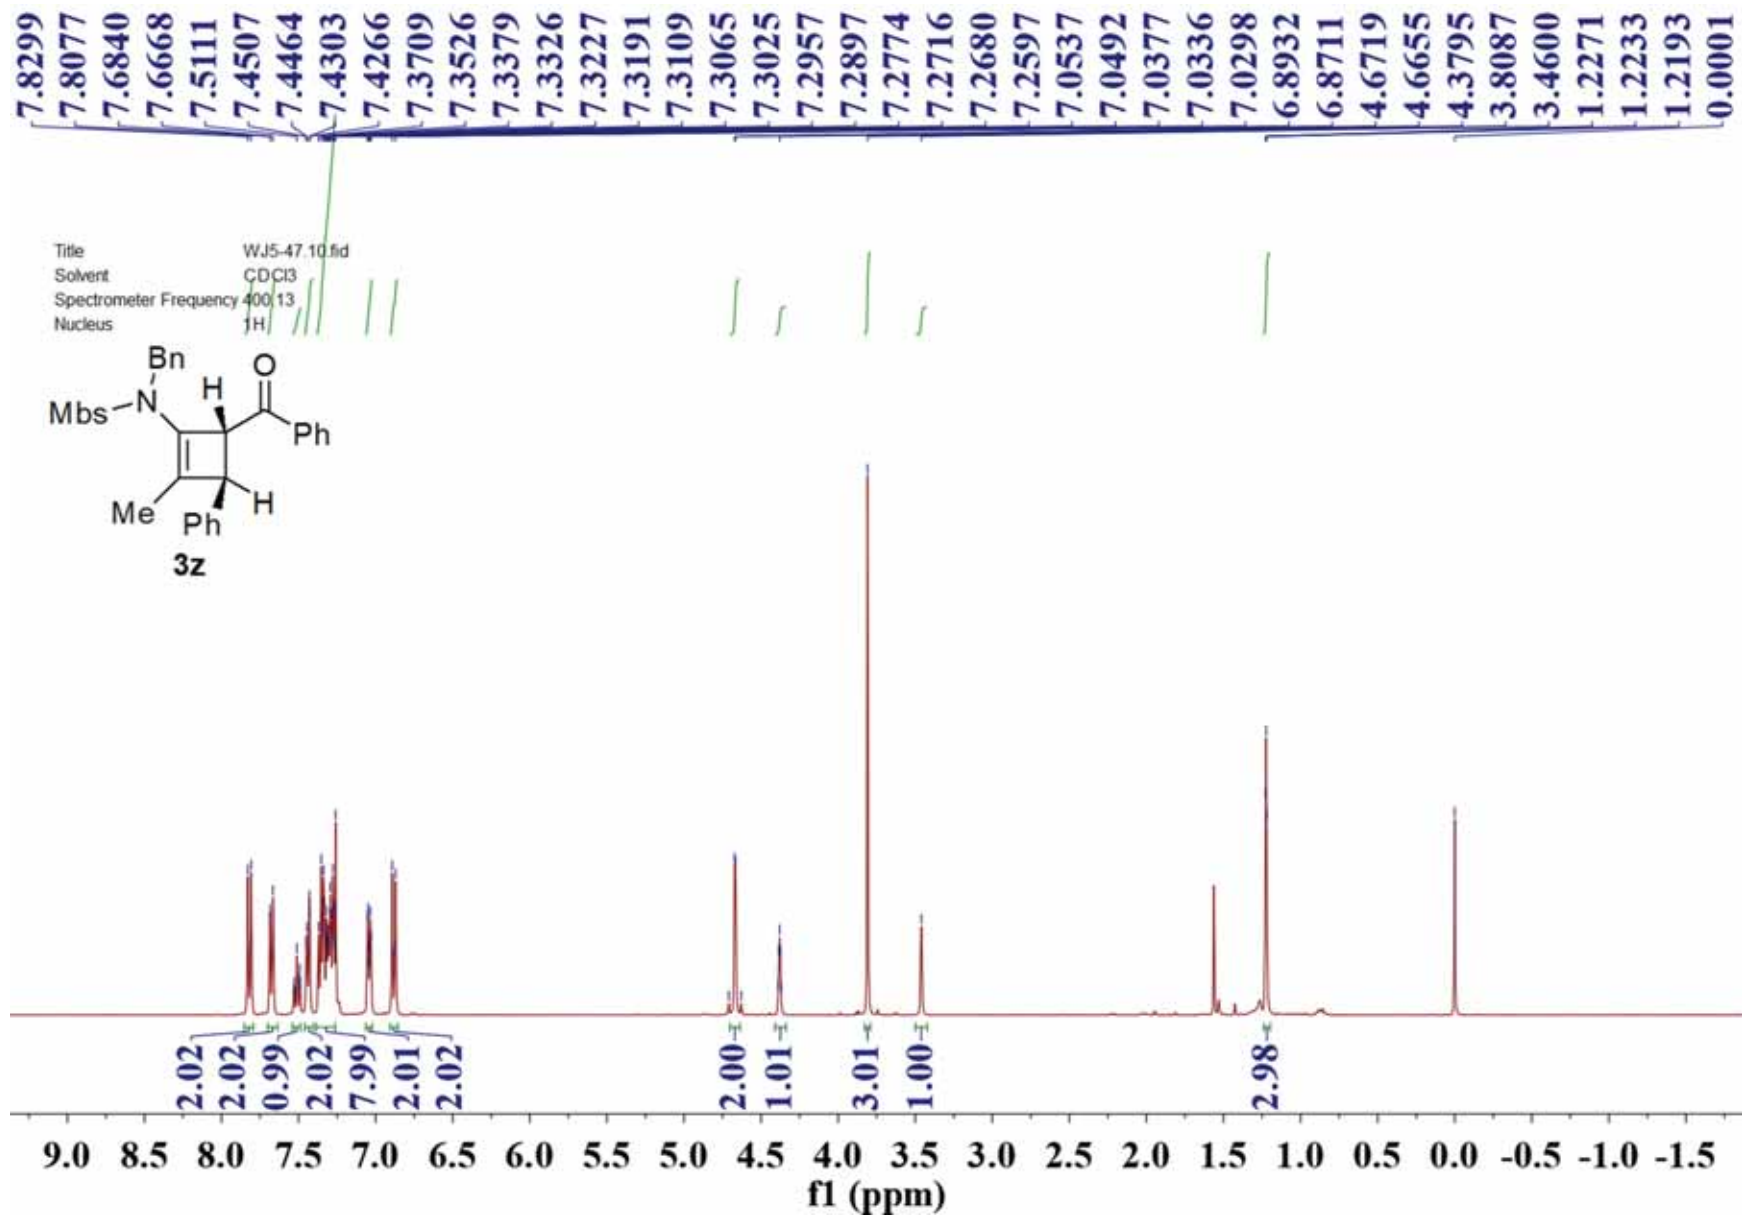

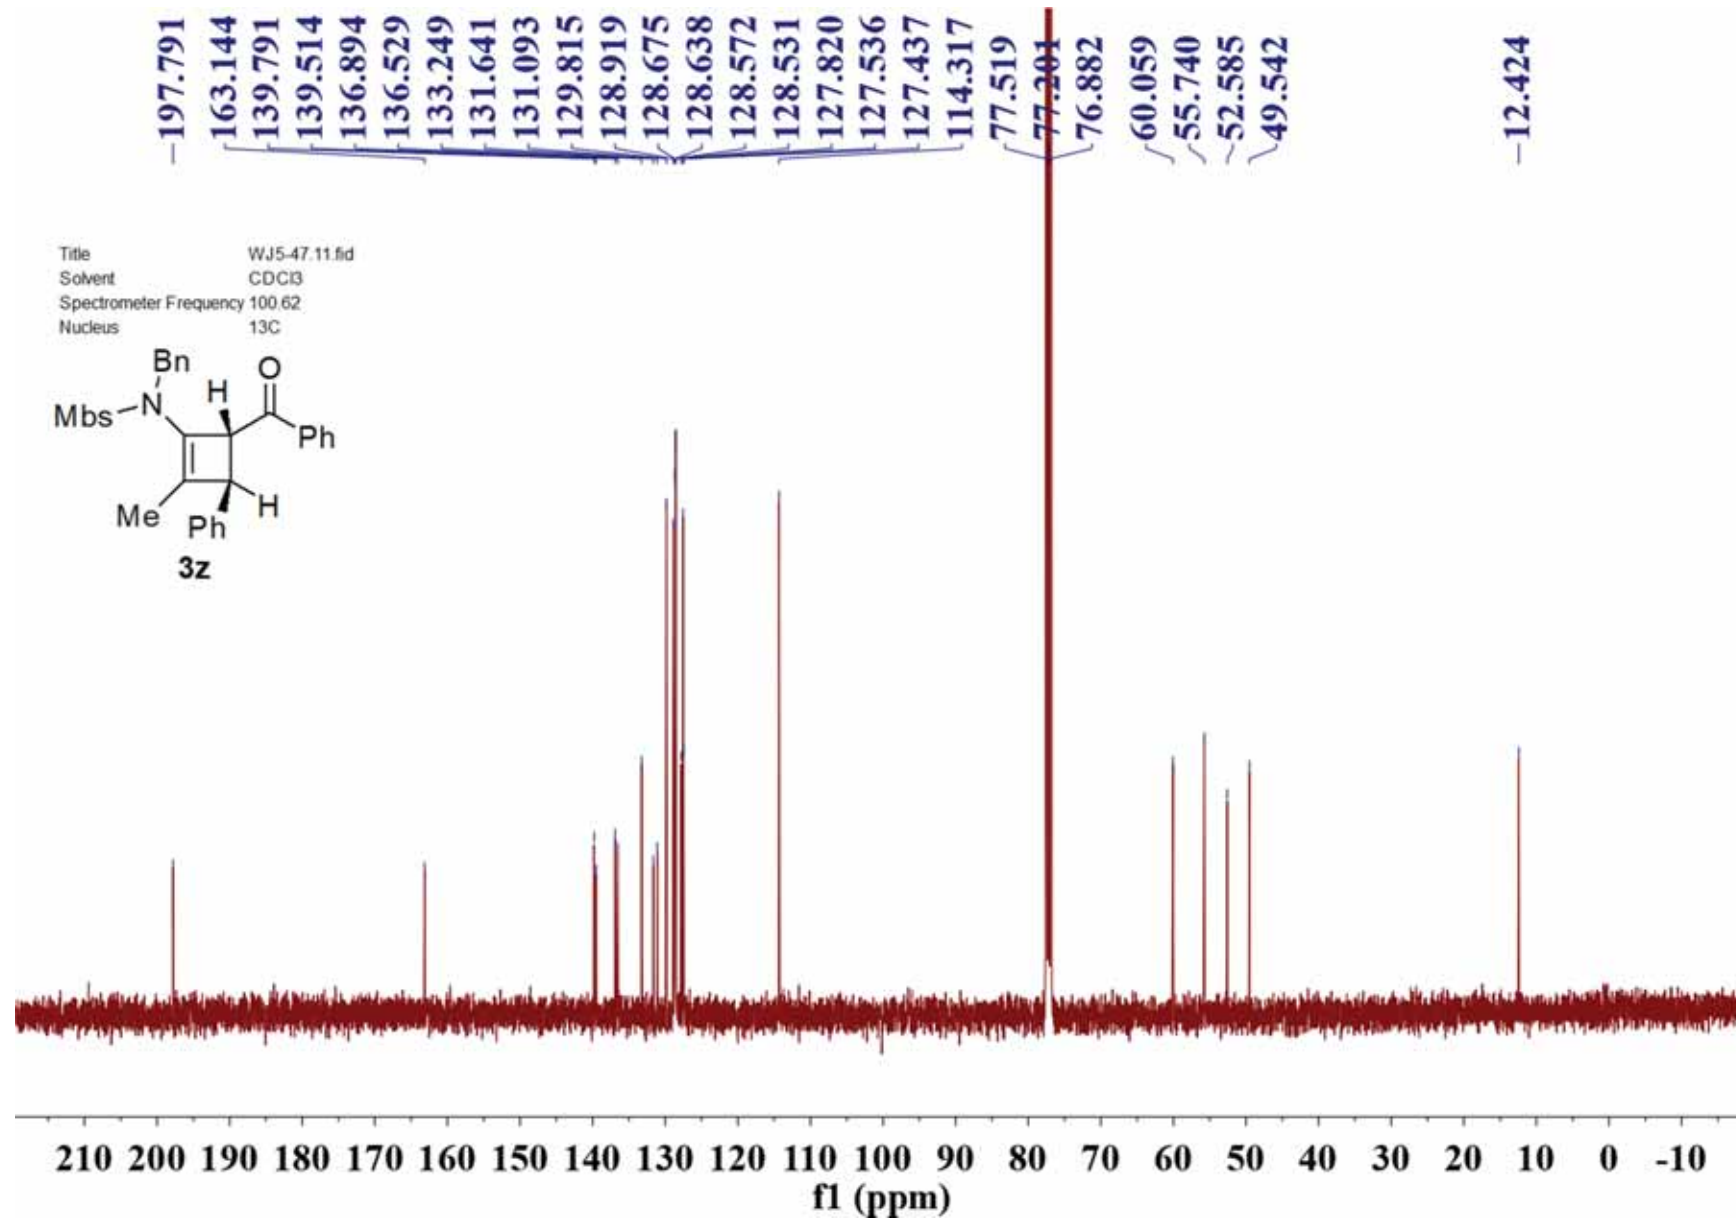

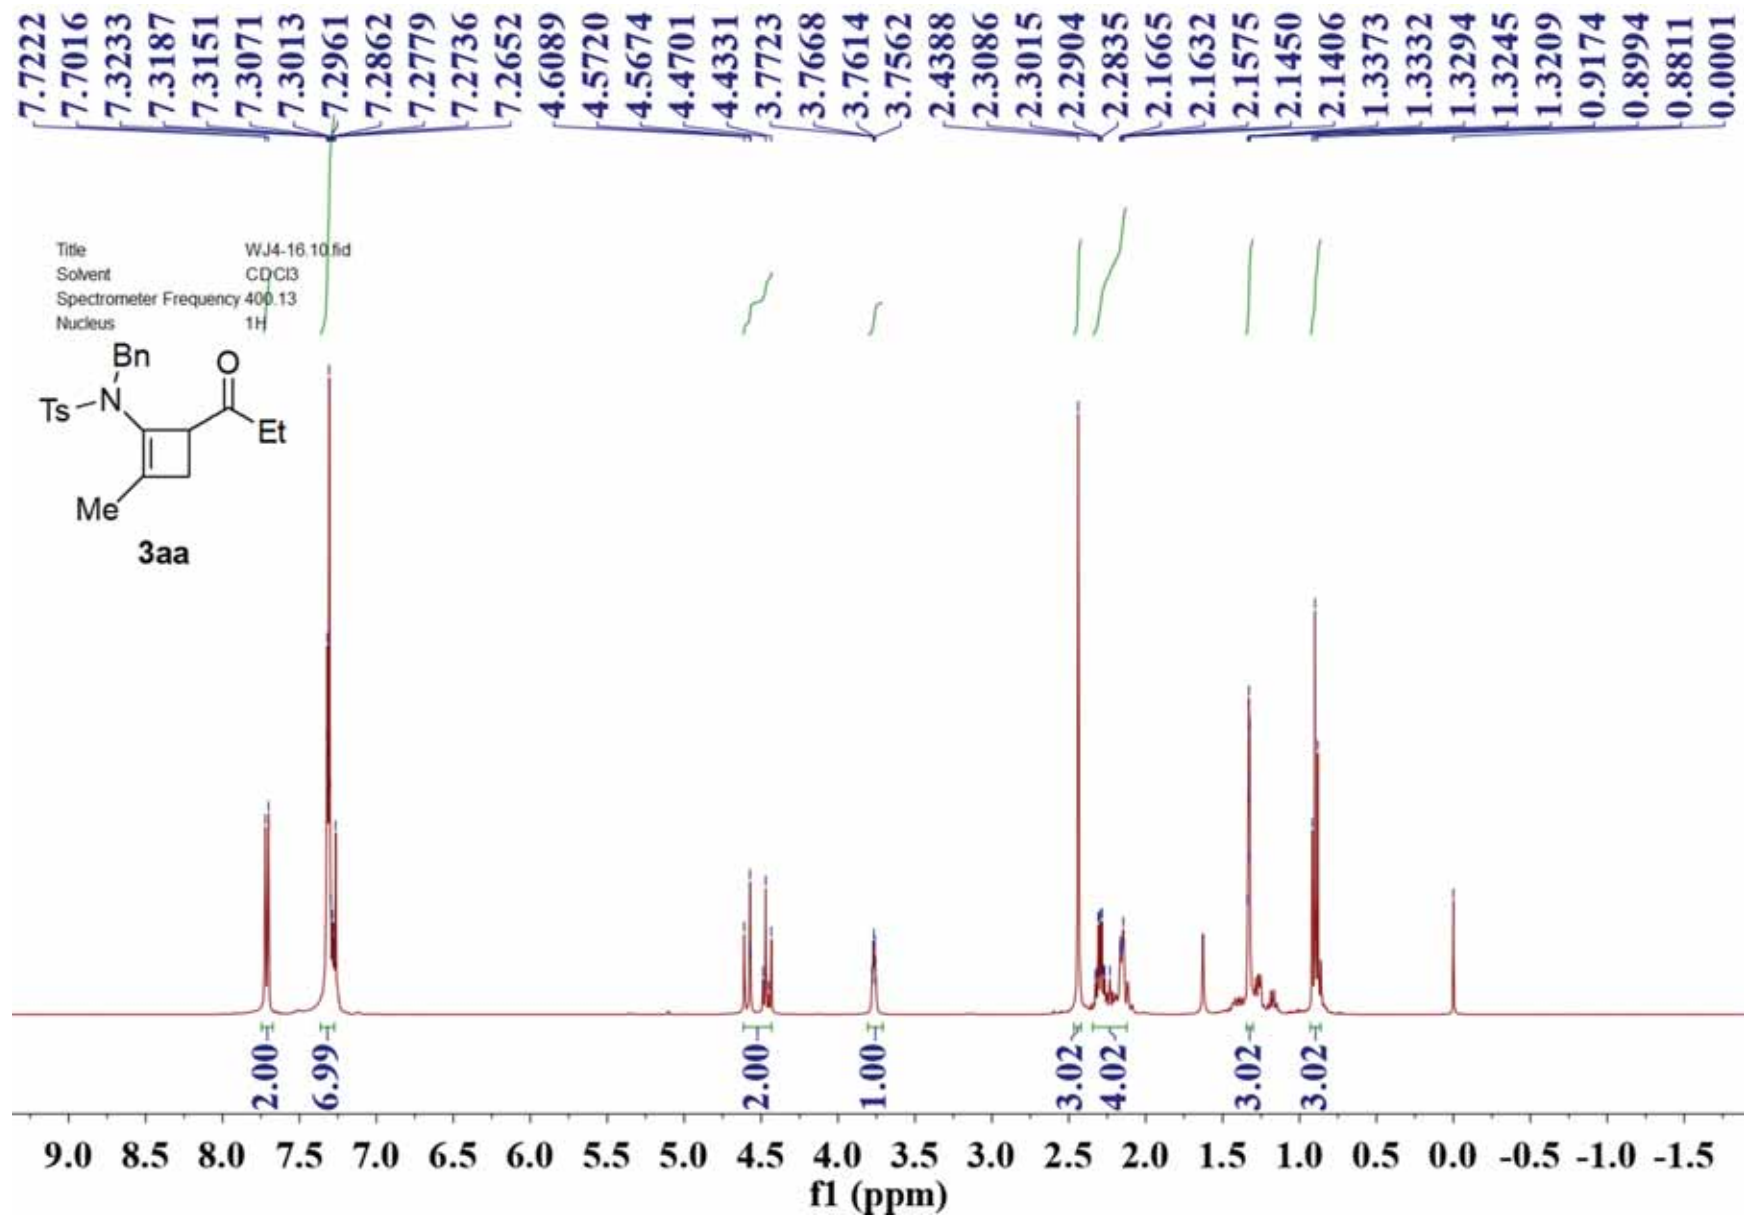

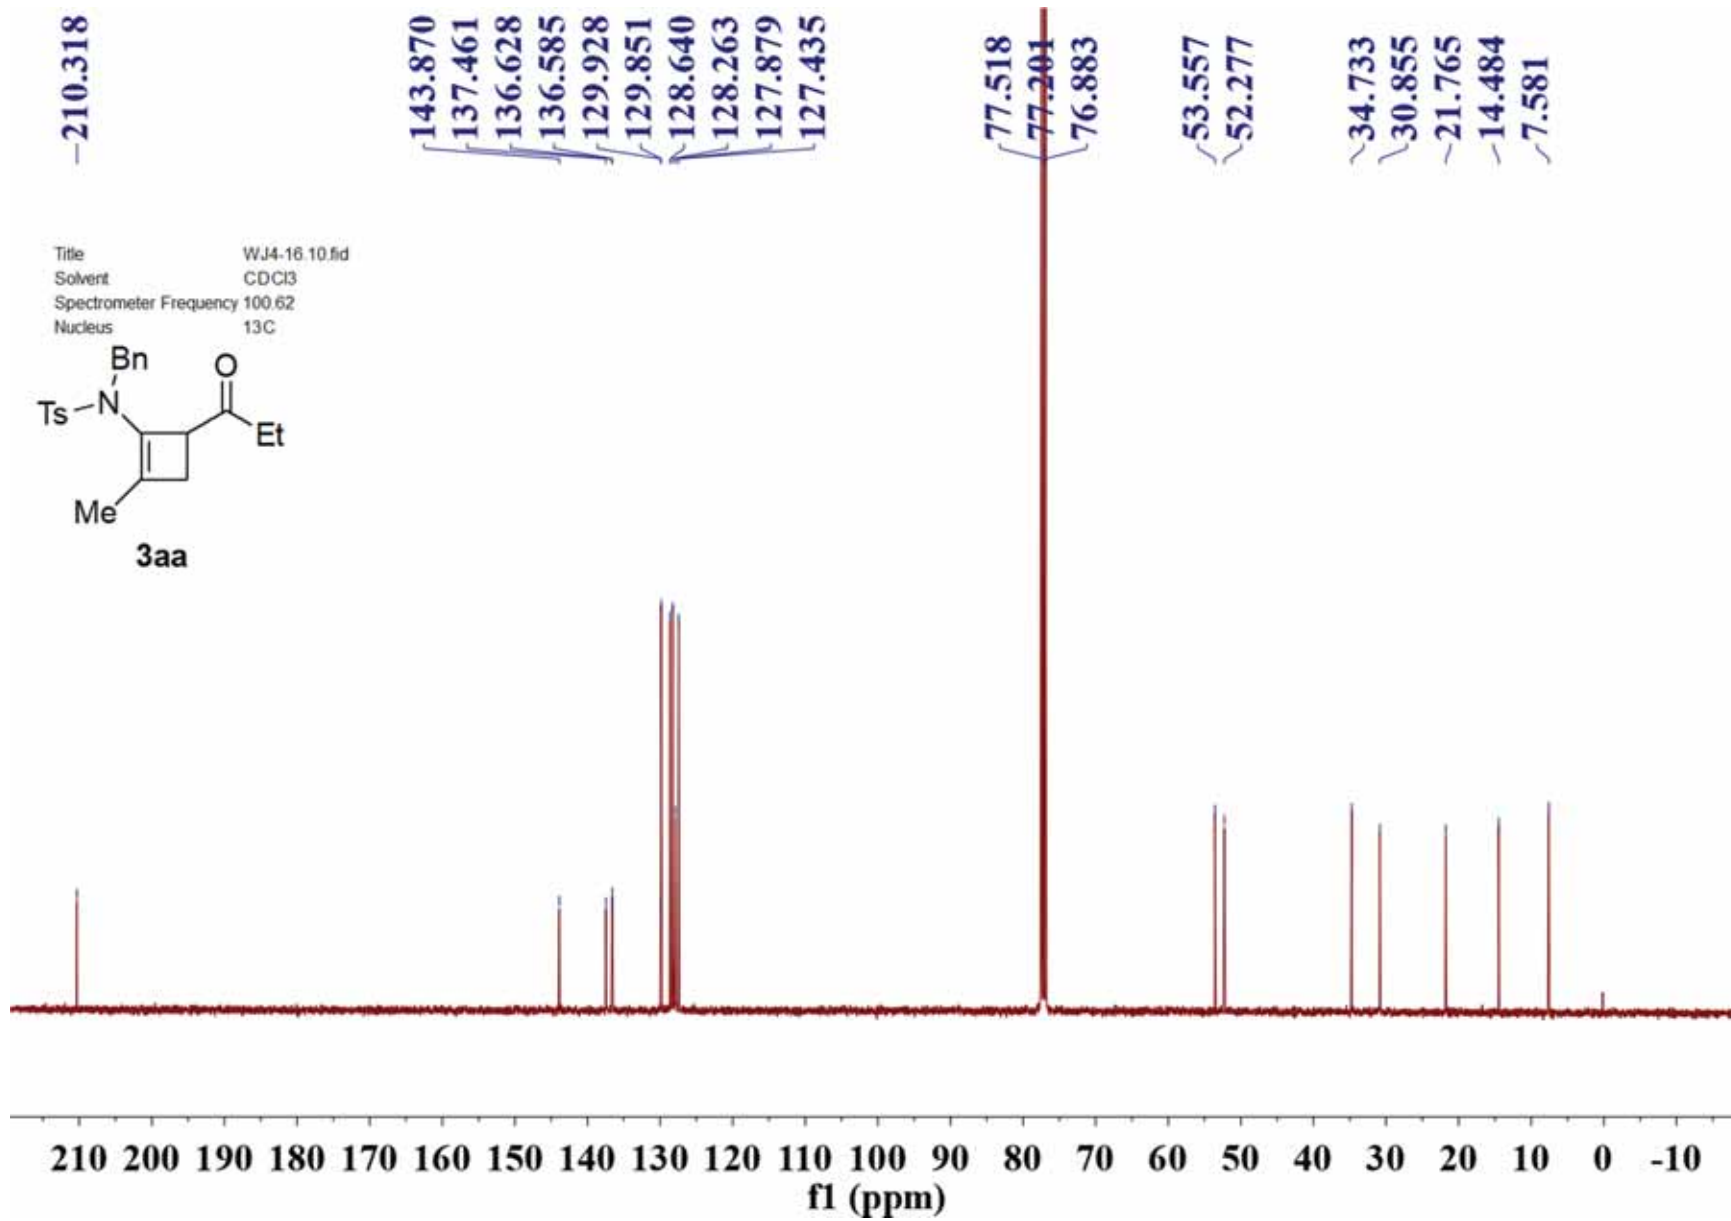

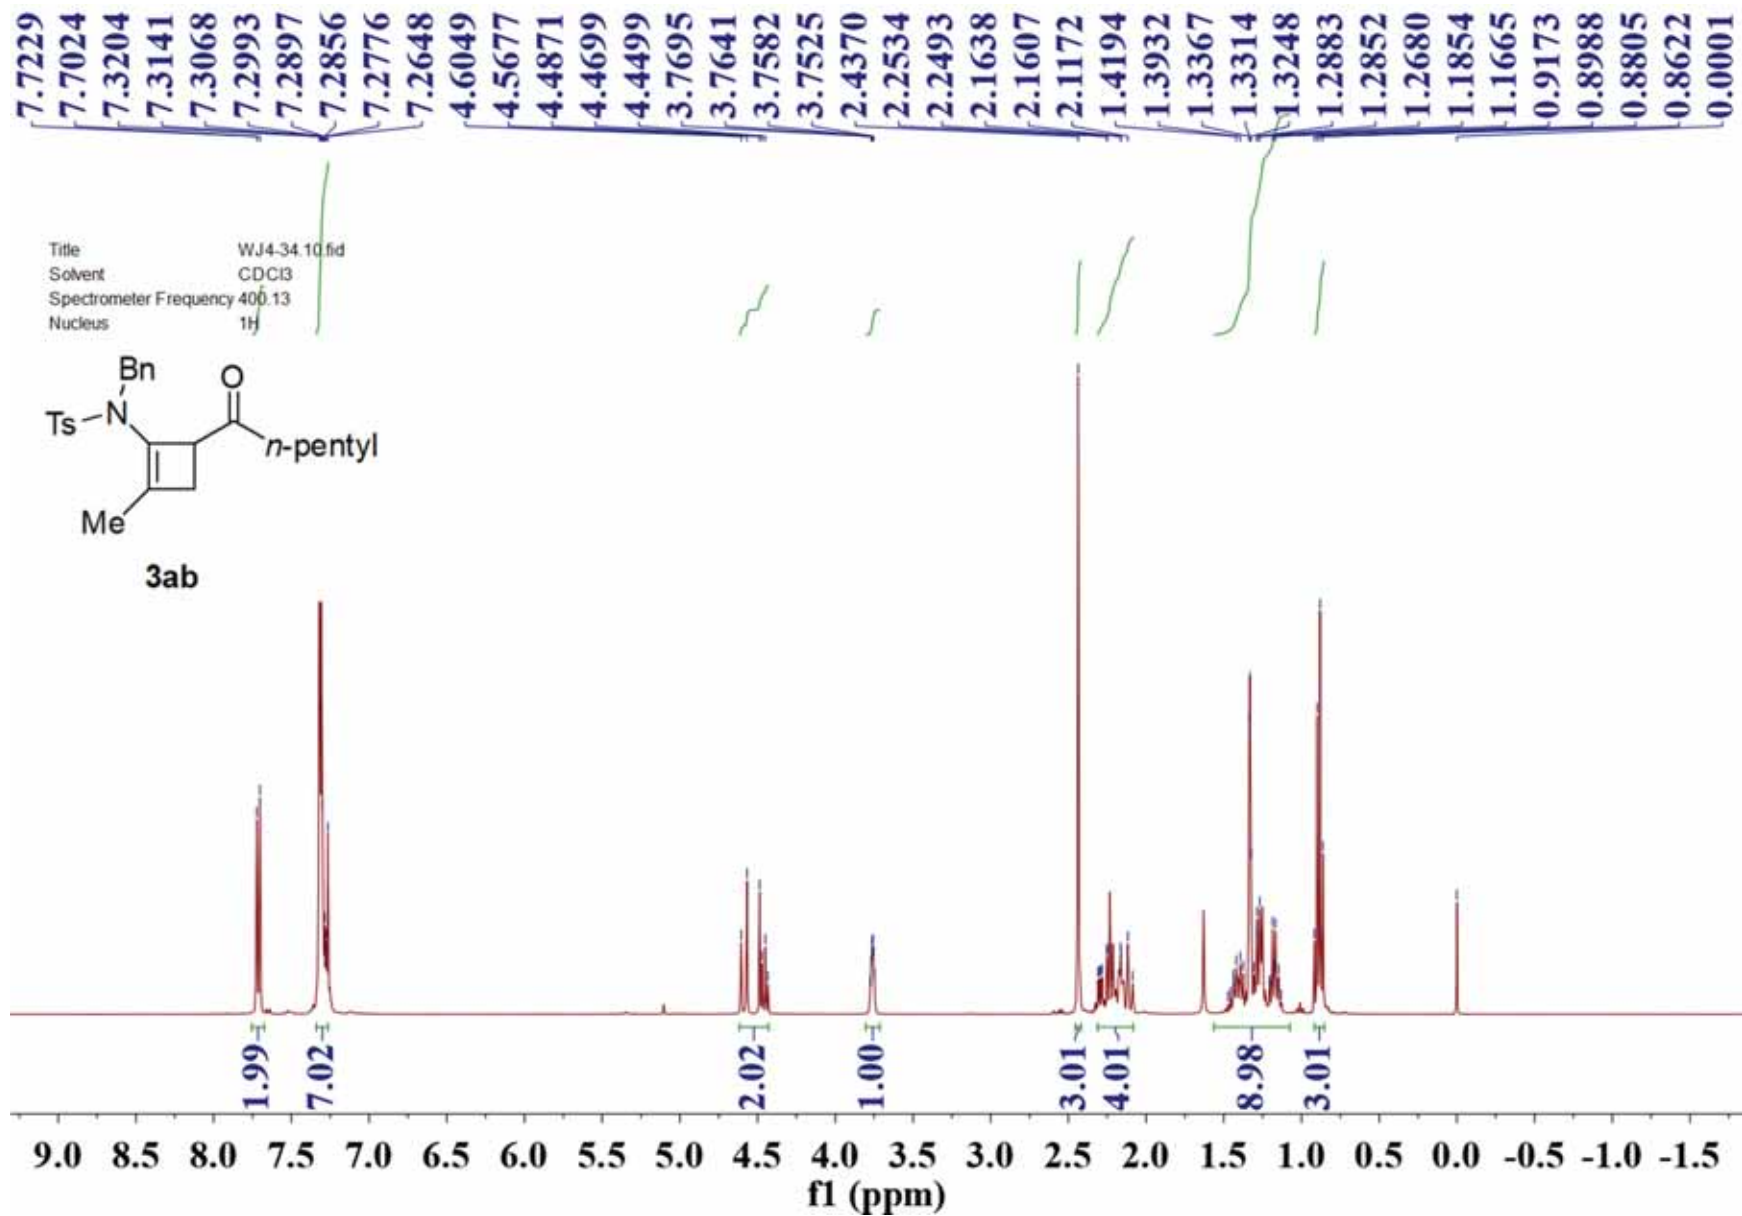

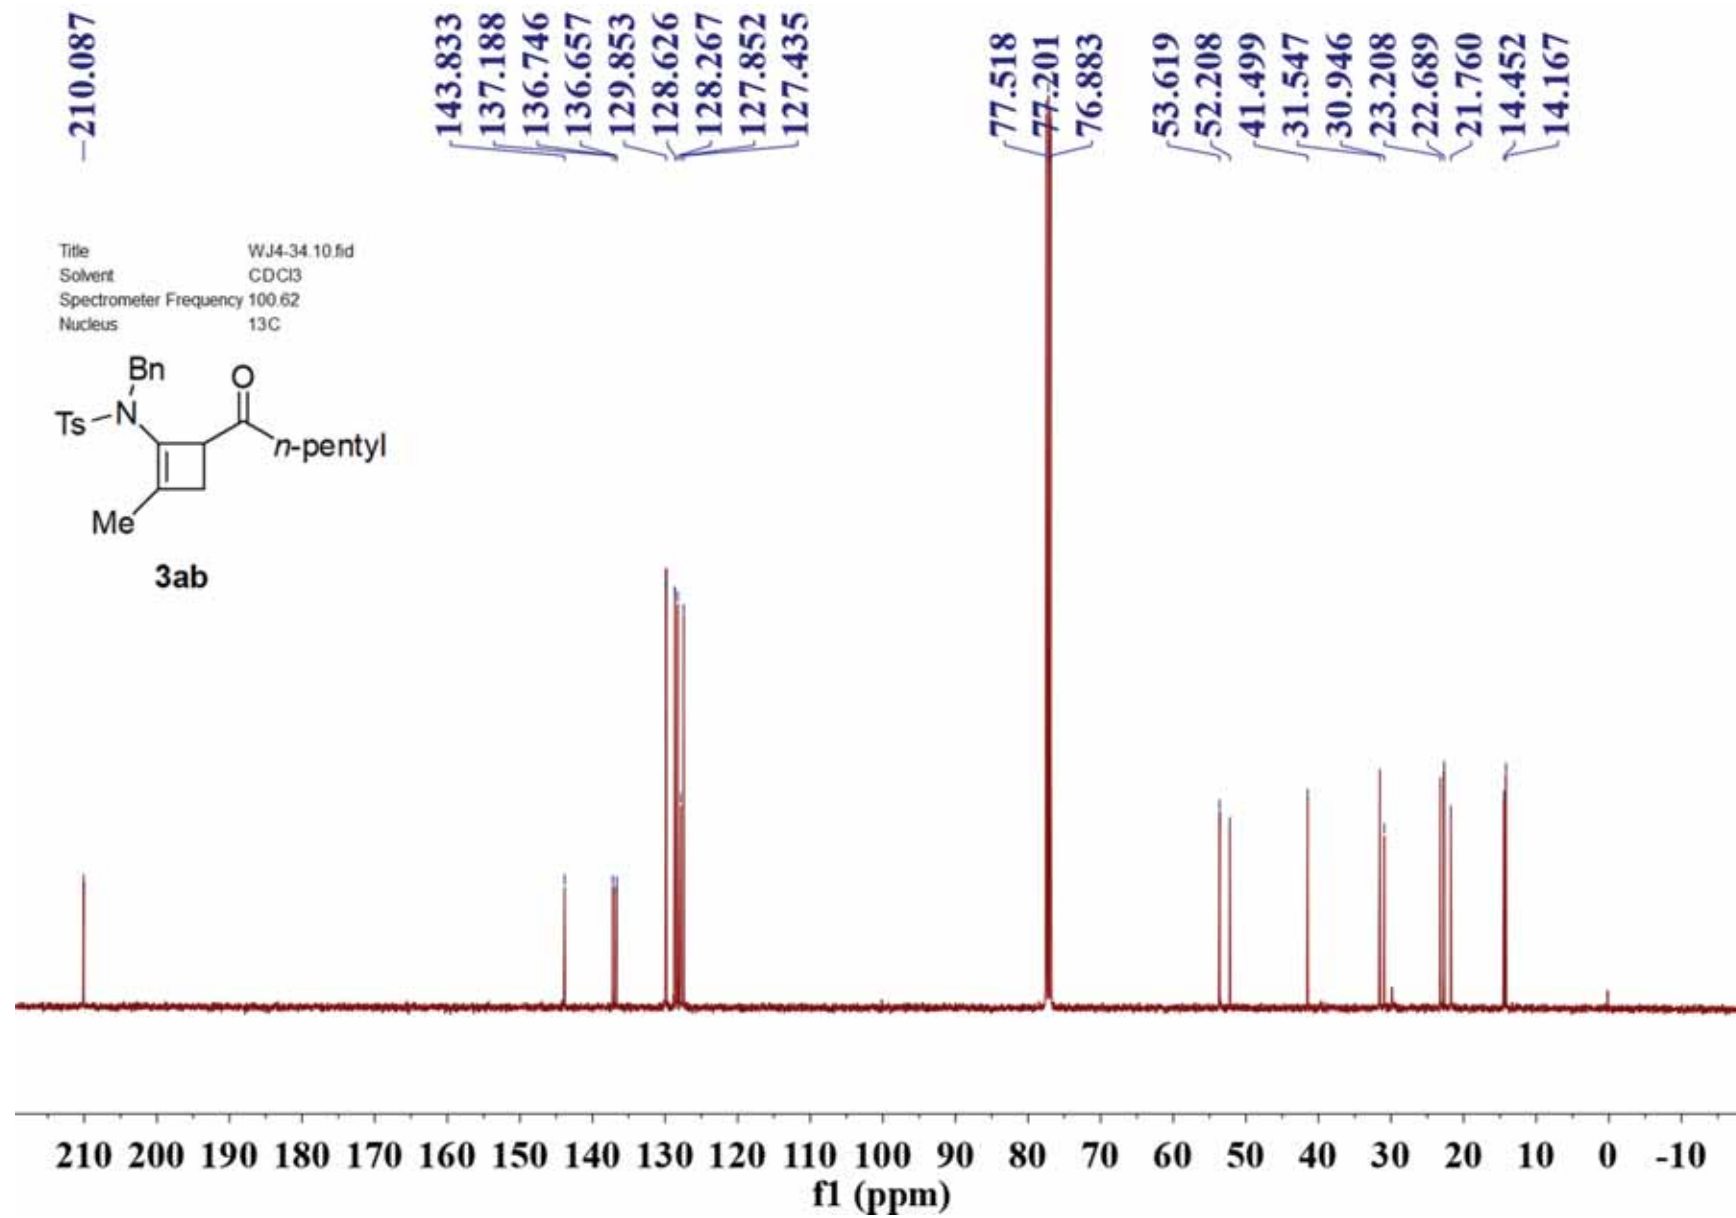



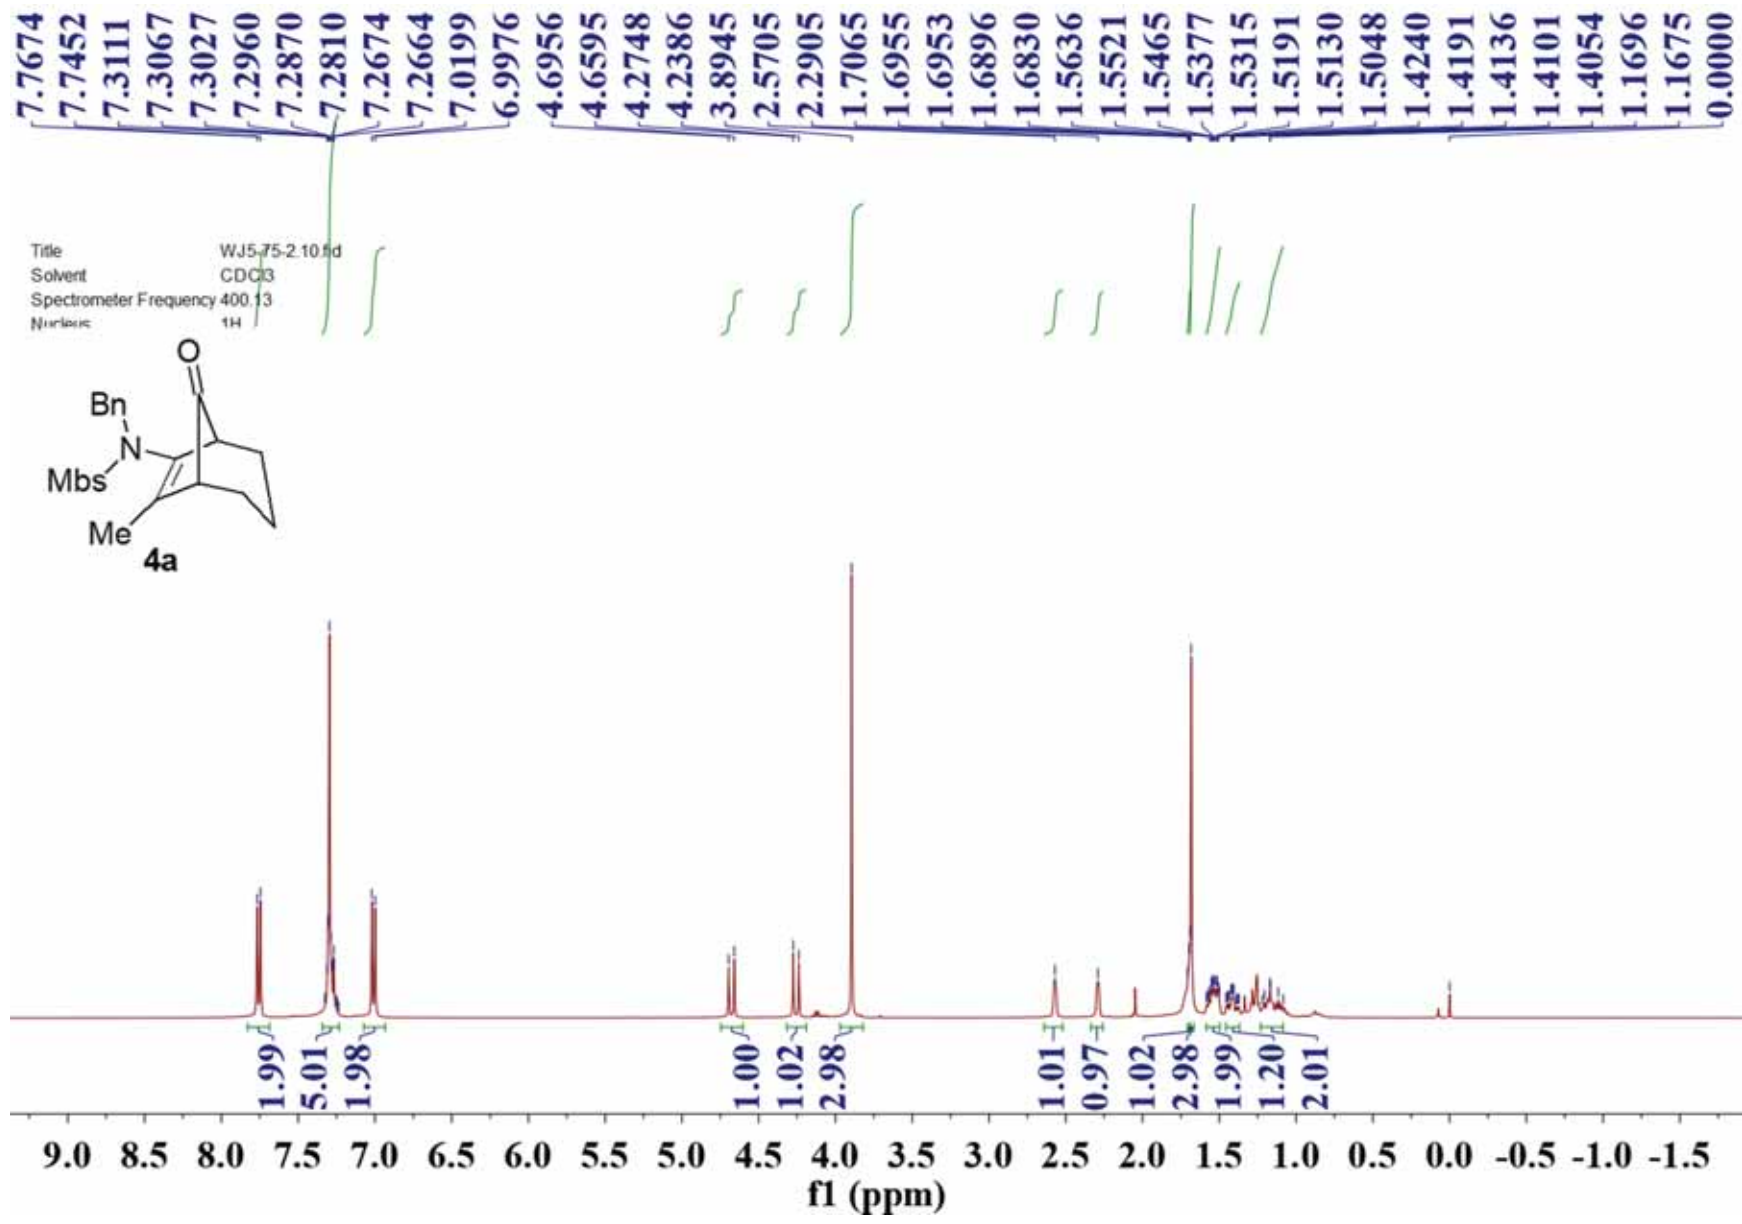

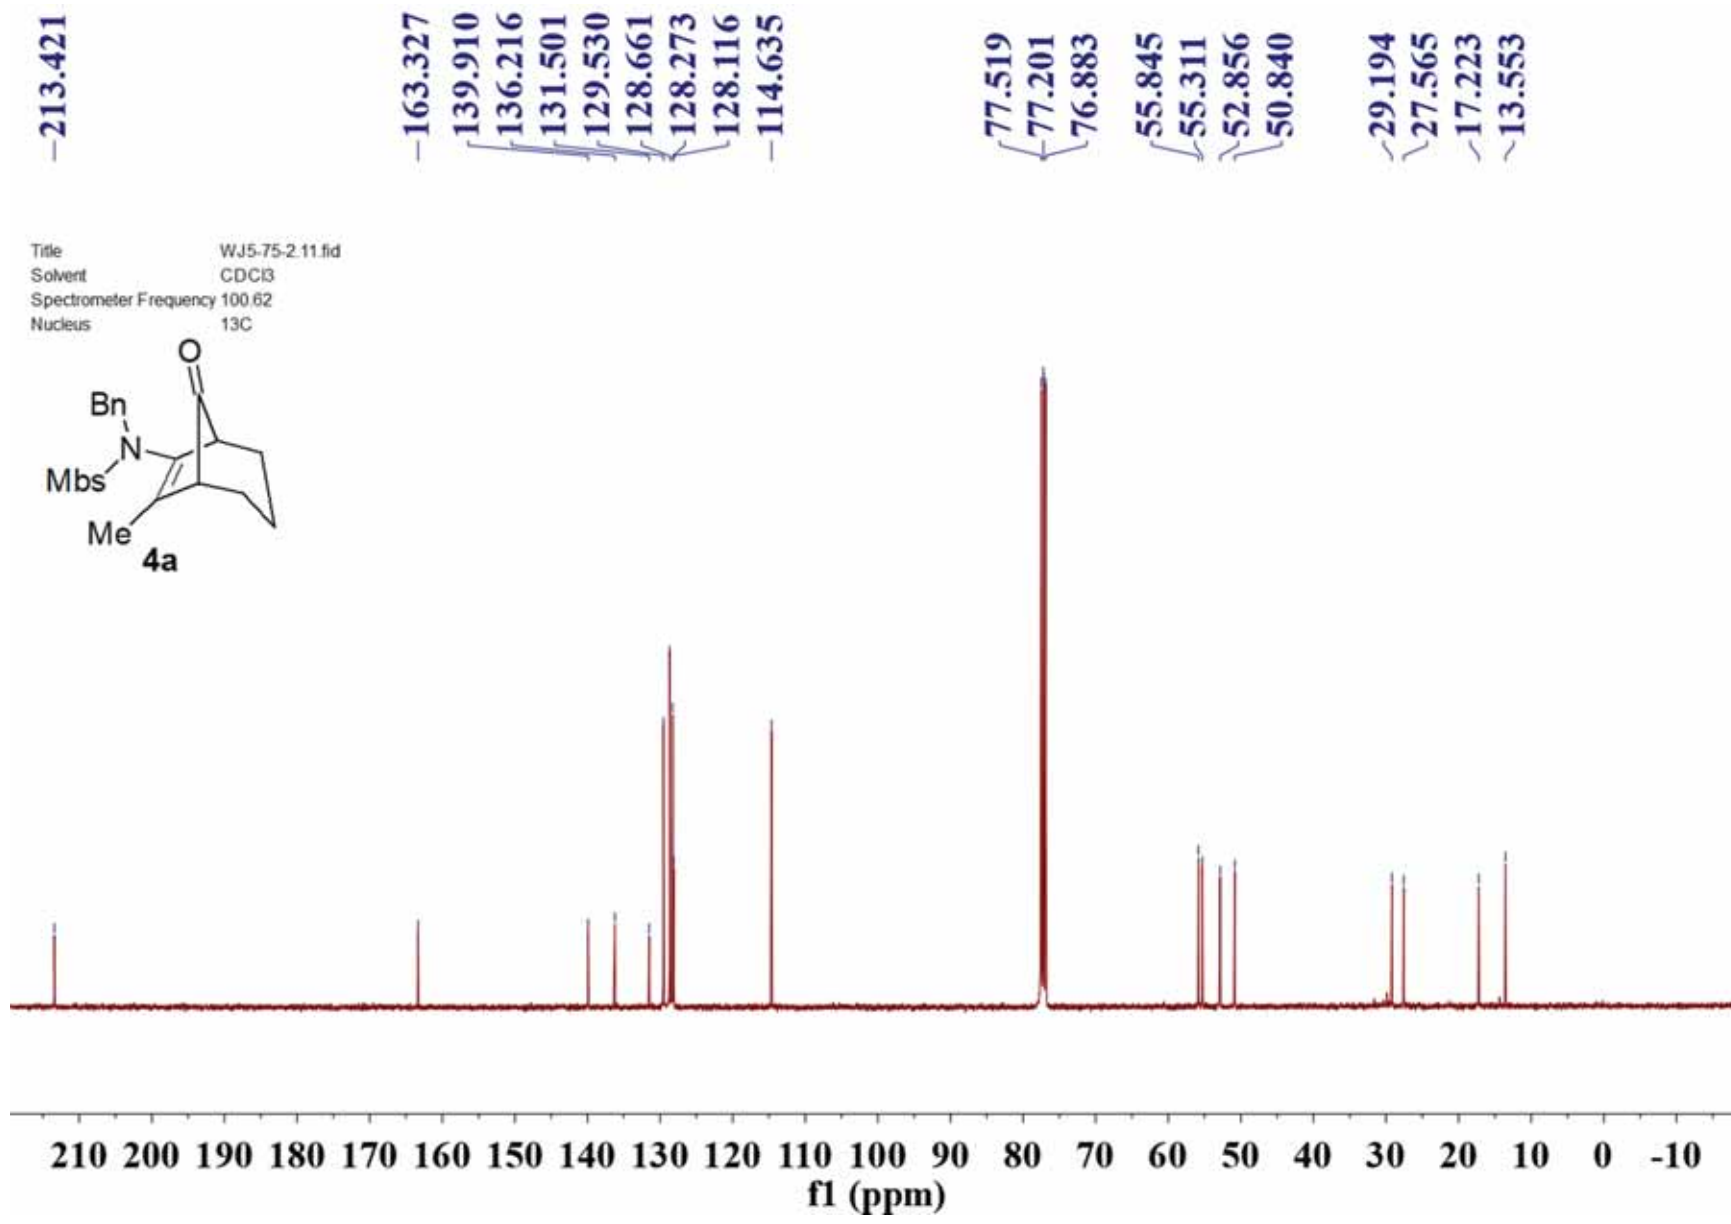

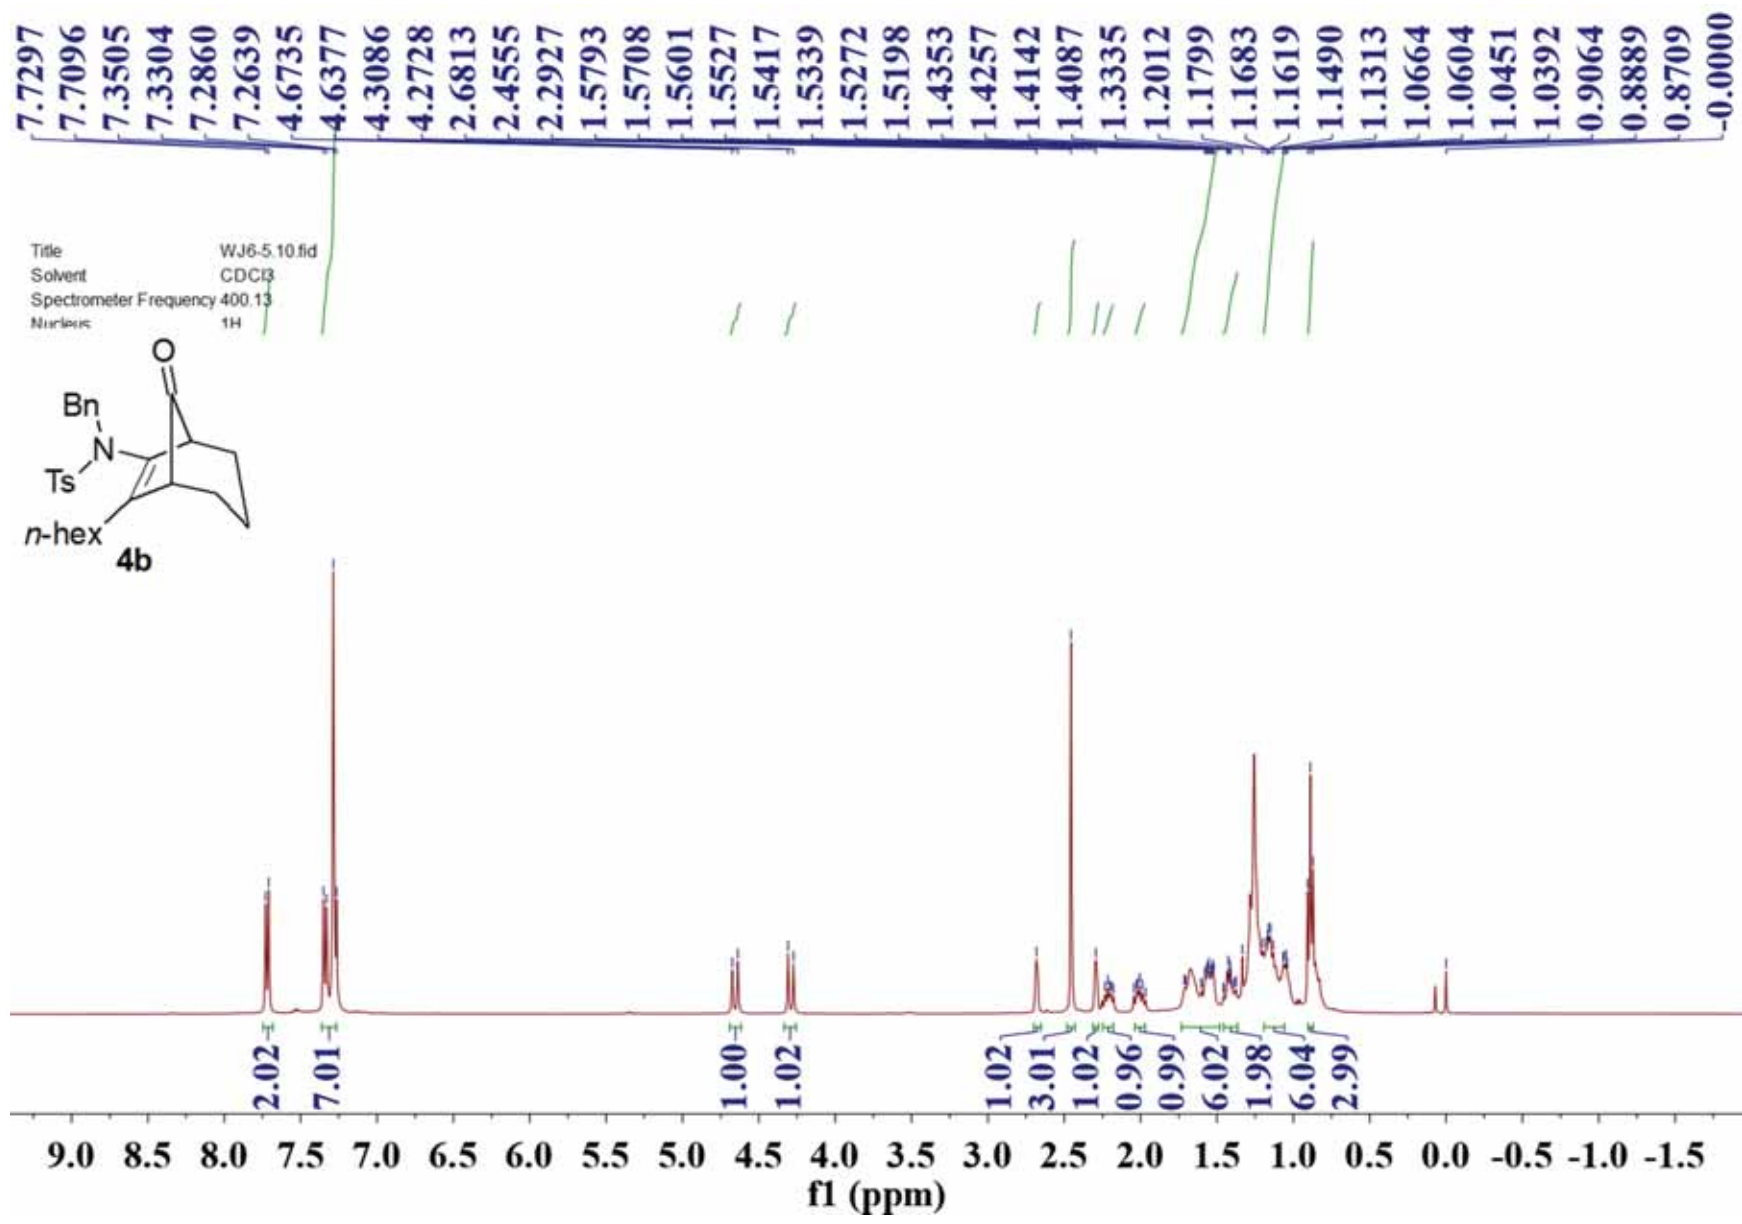

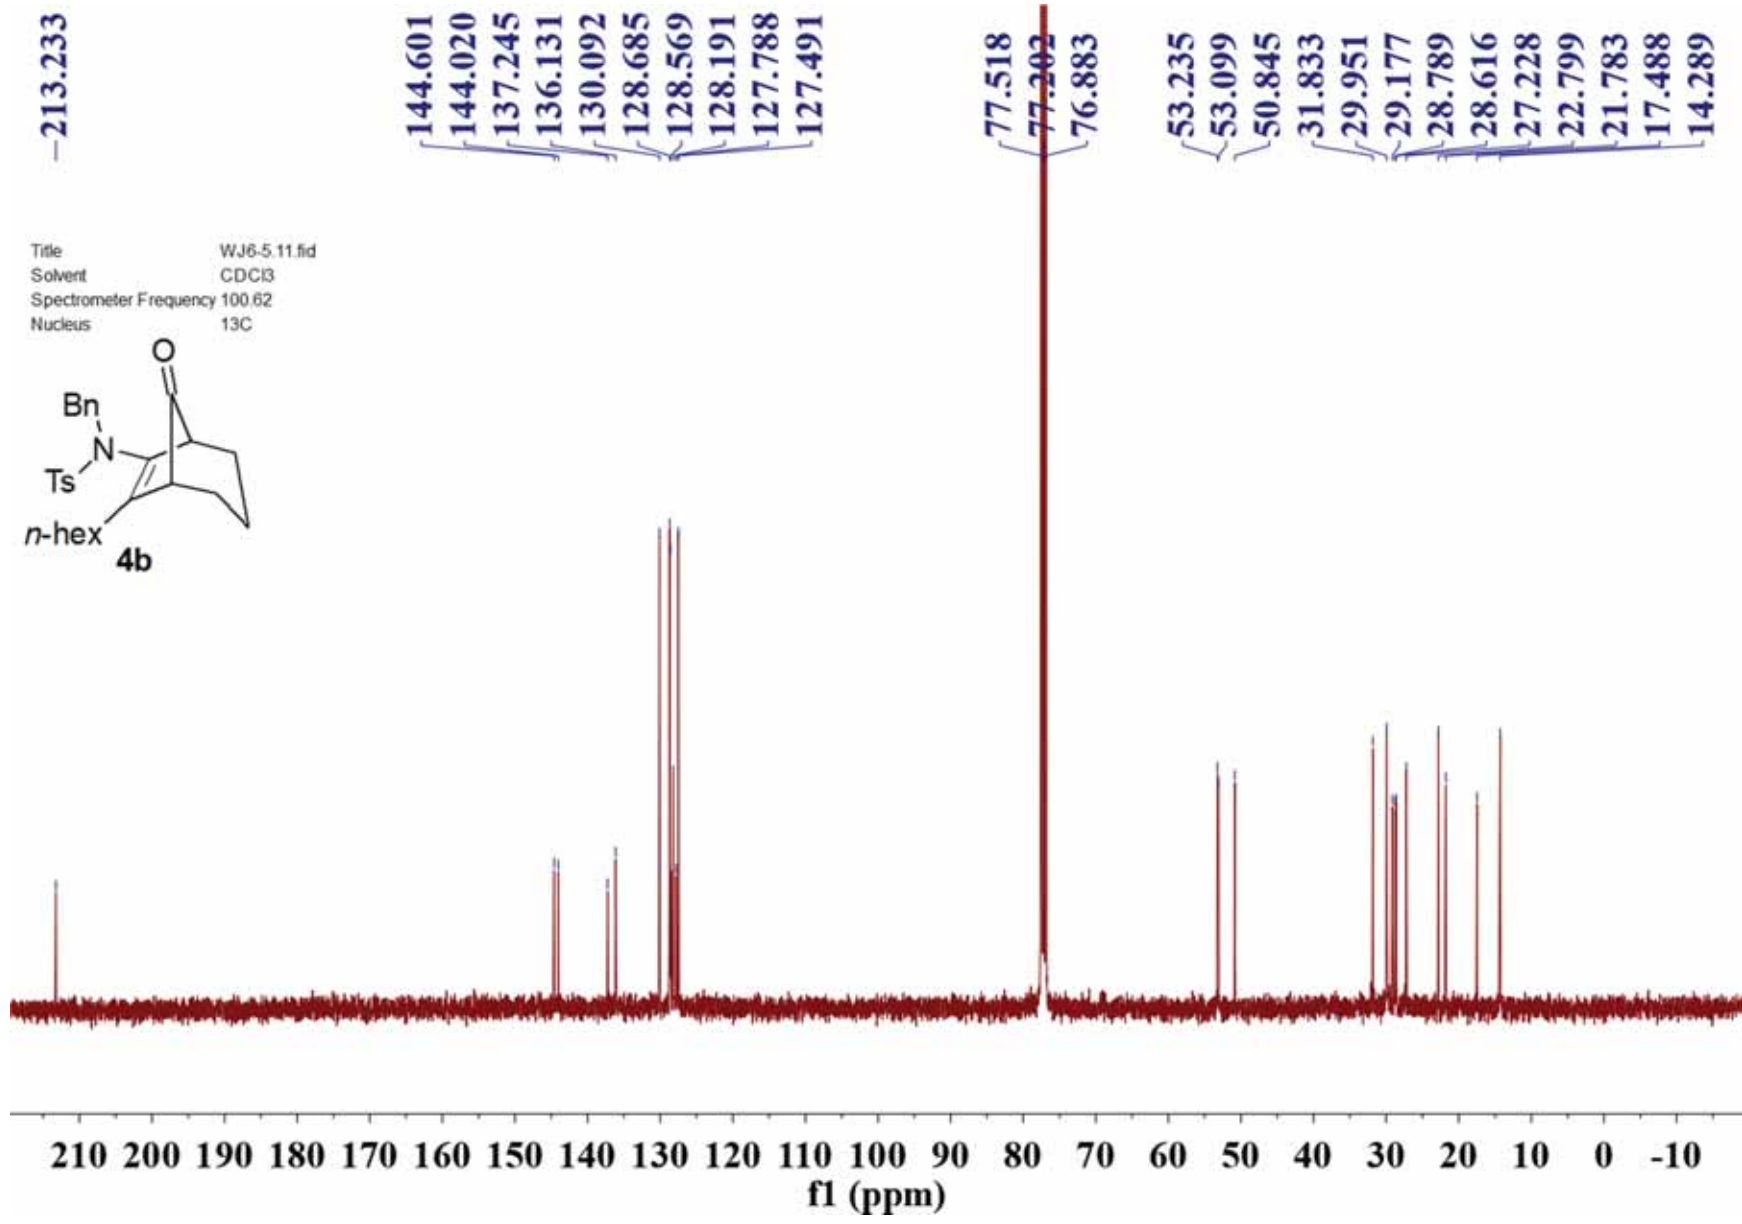

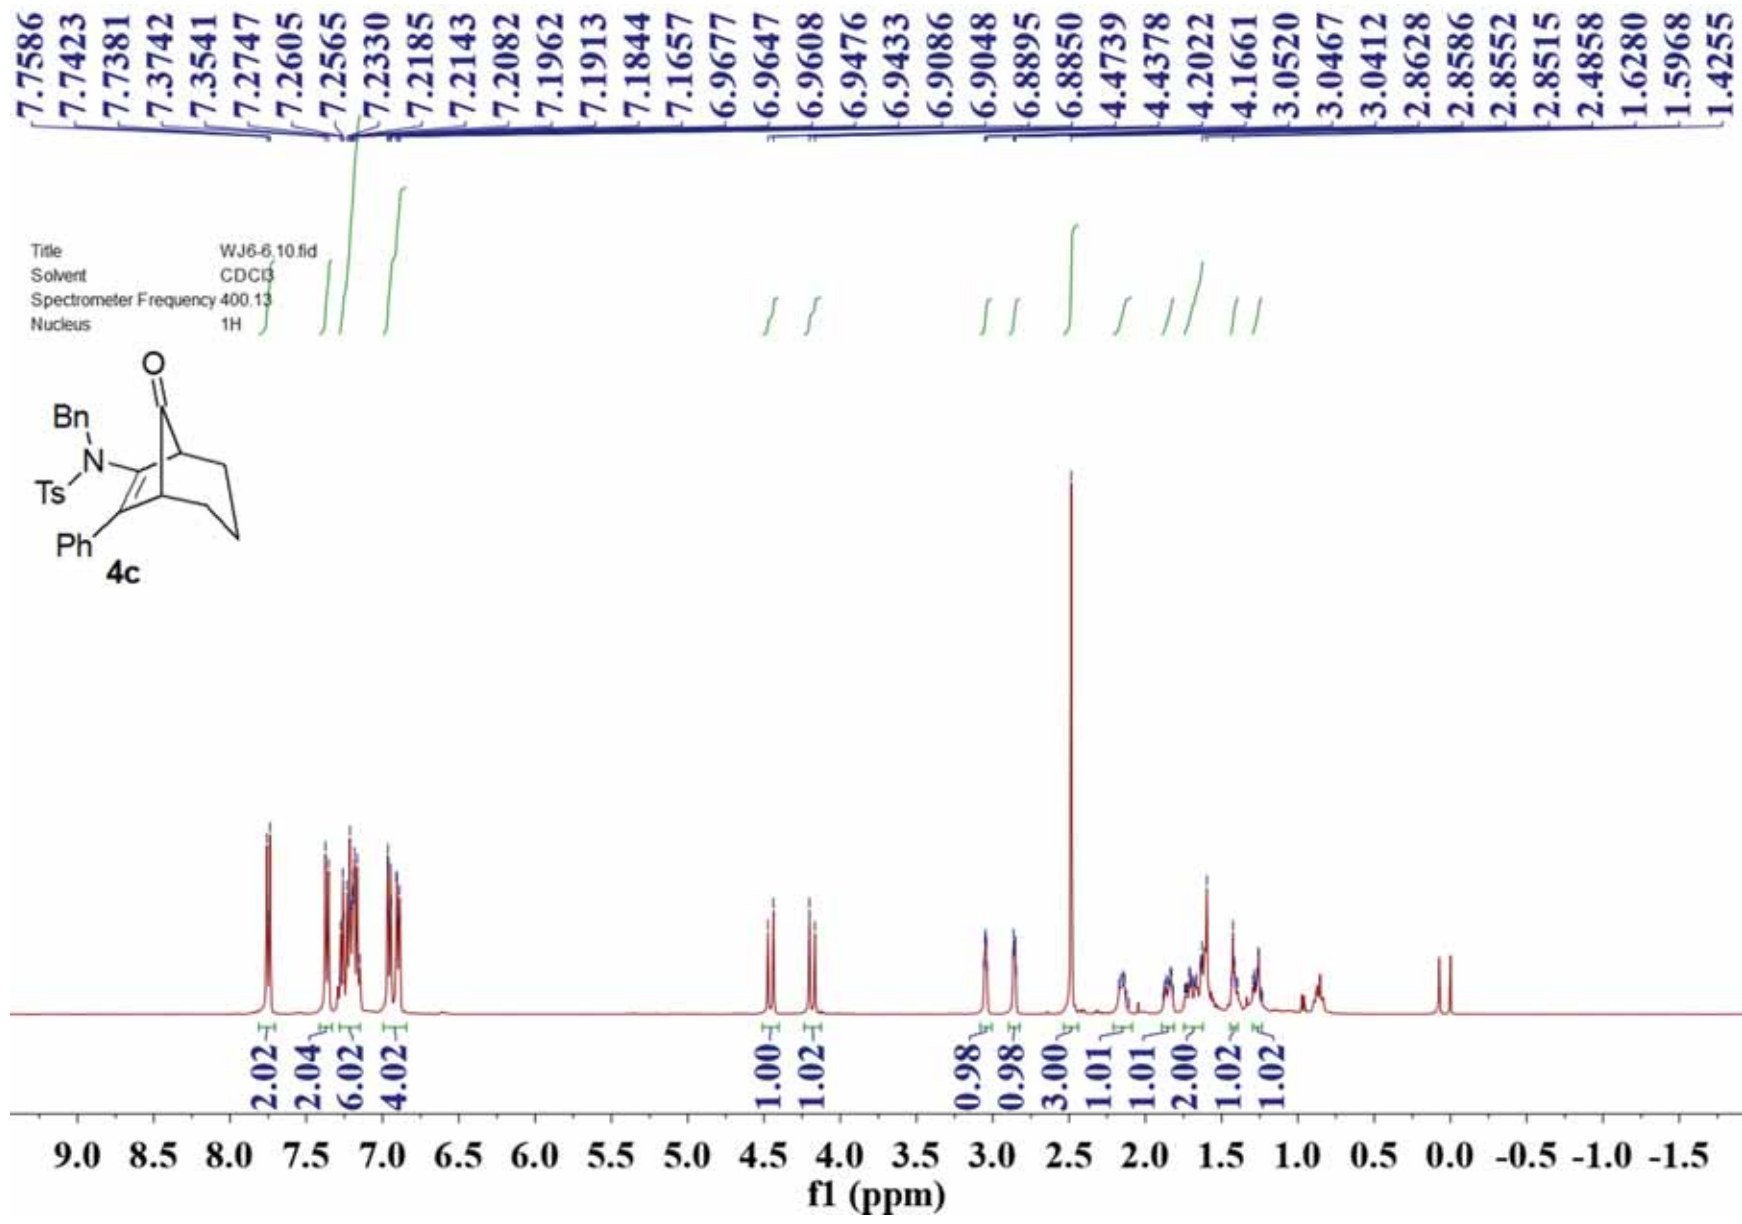

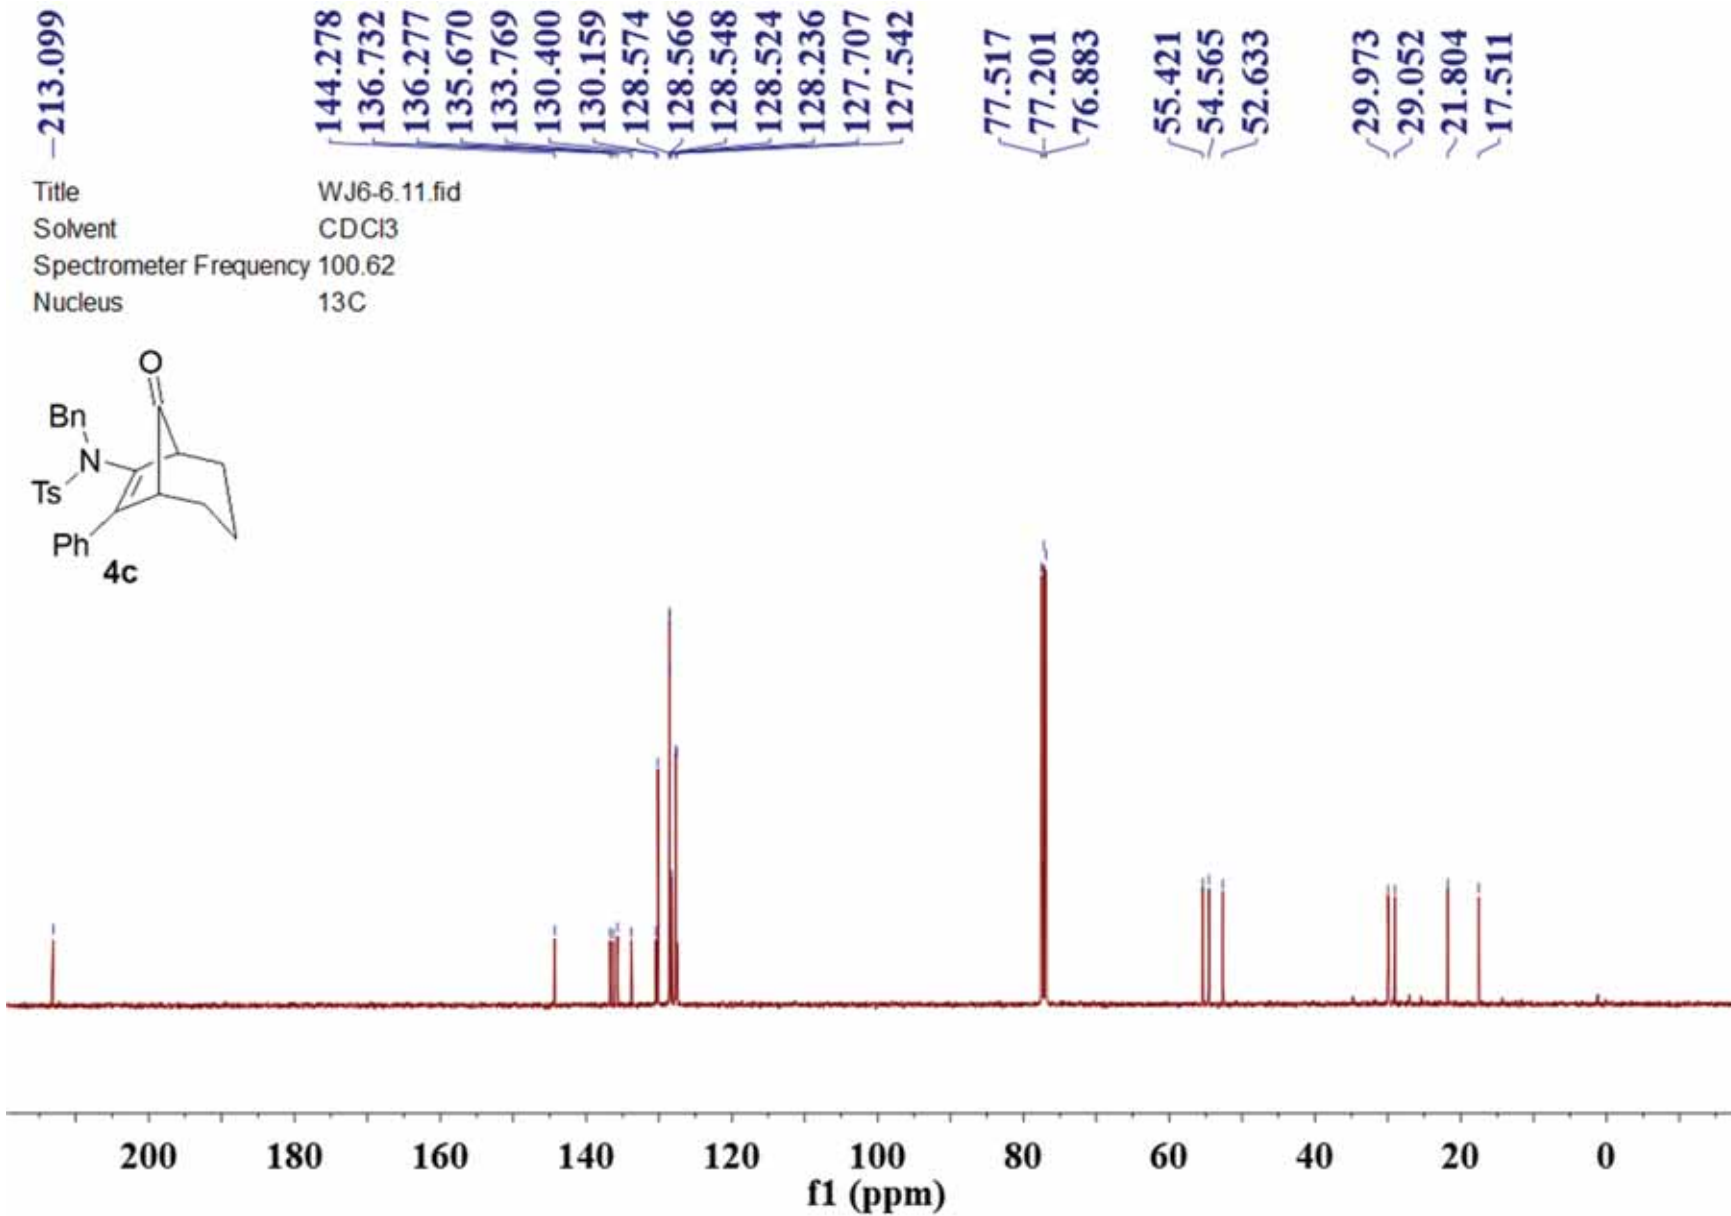

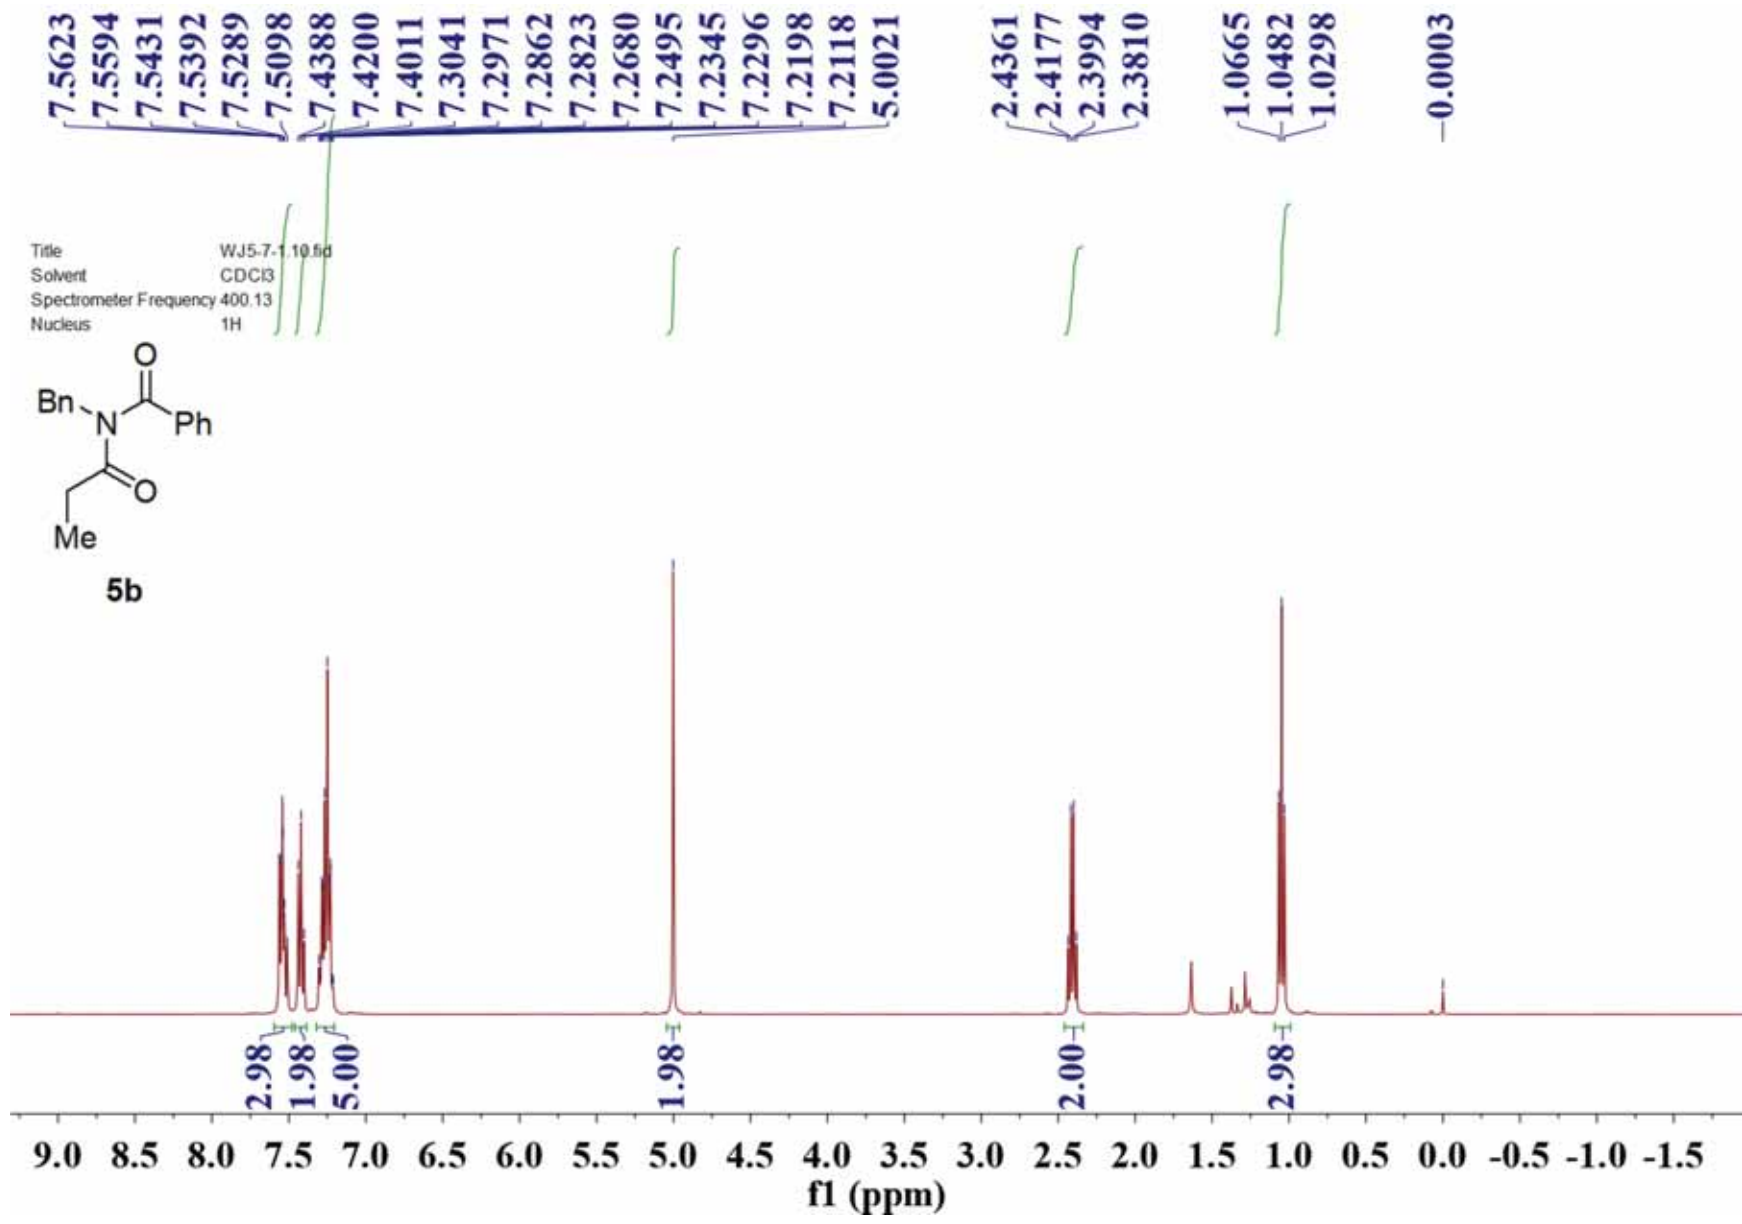

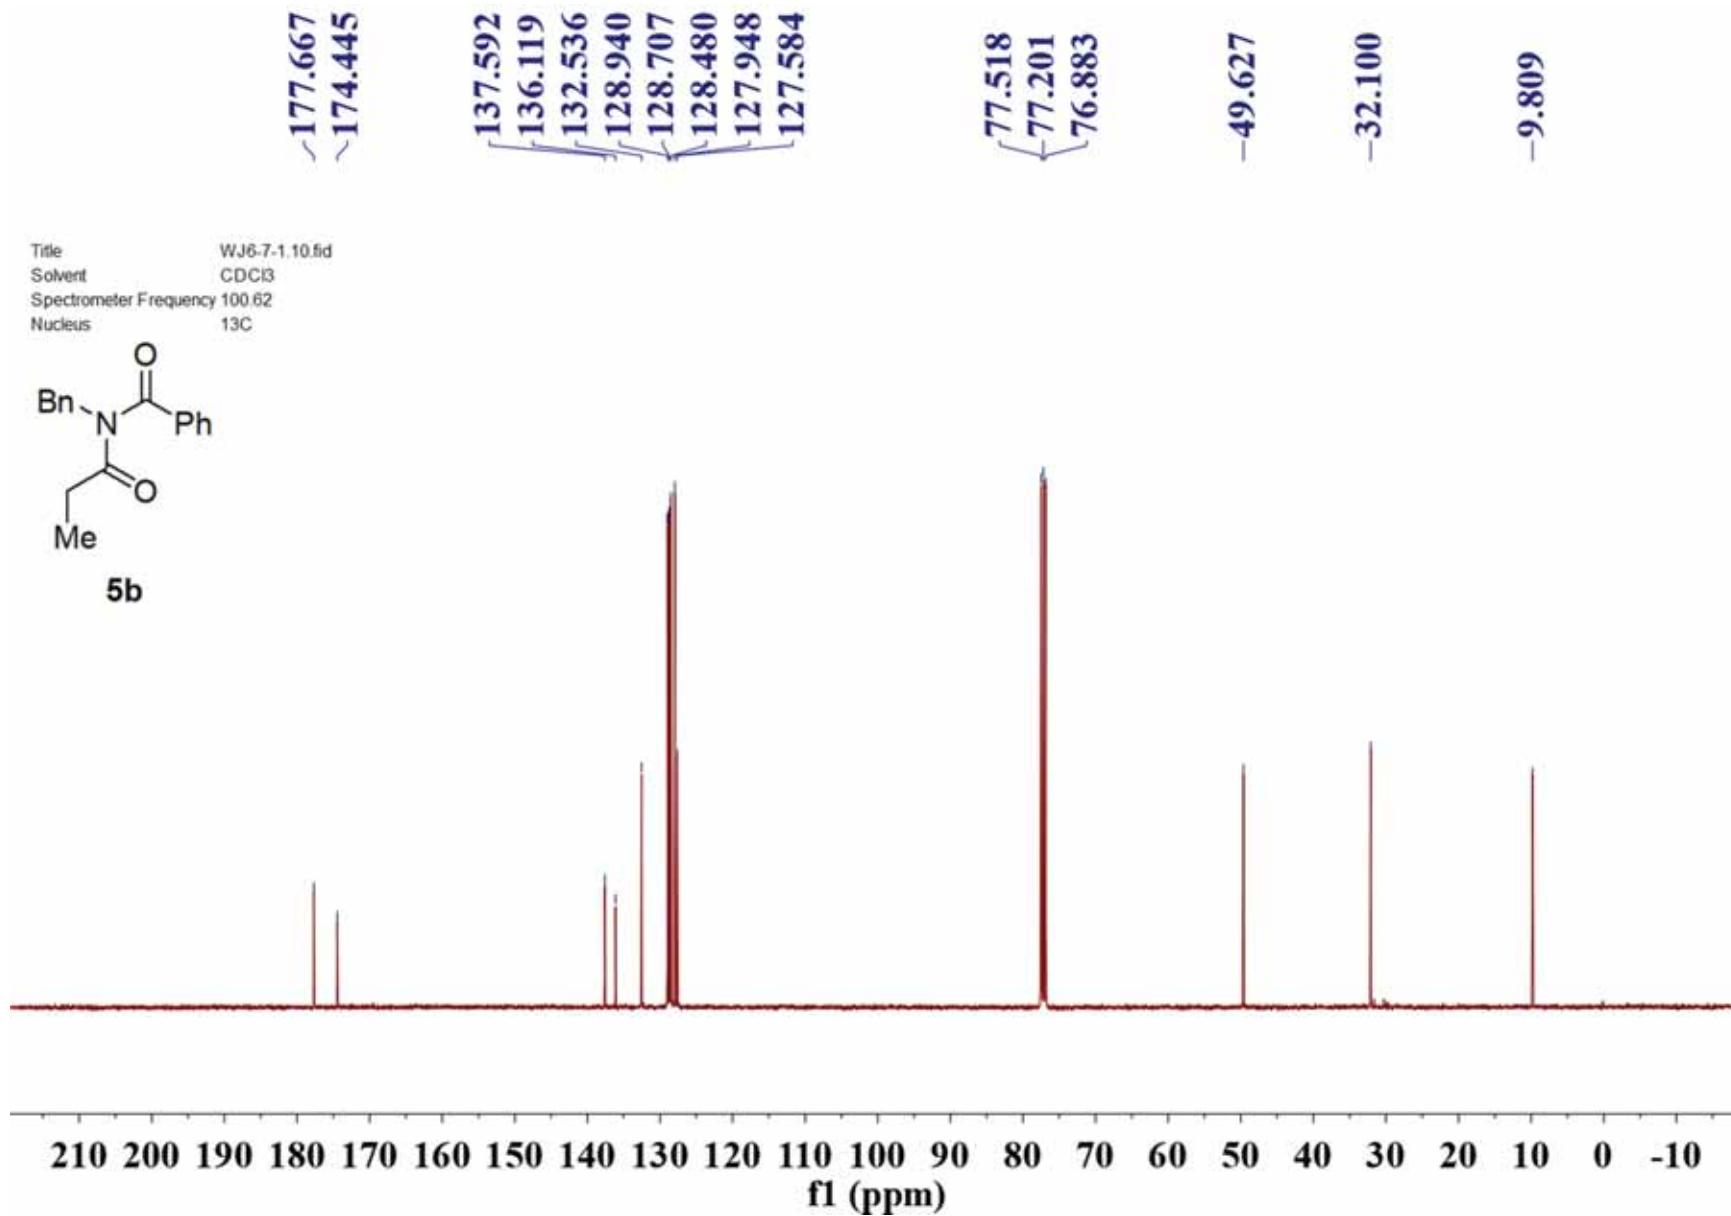



### NOESY Spectra of Cyclobutenamides 3.

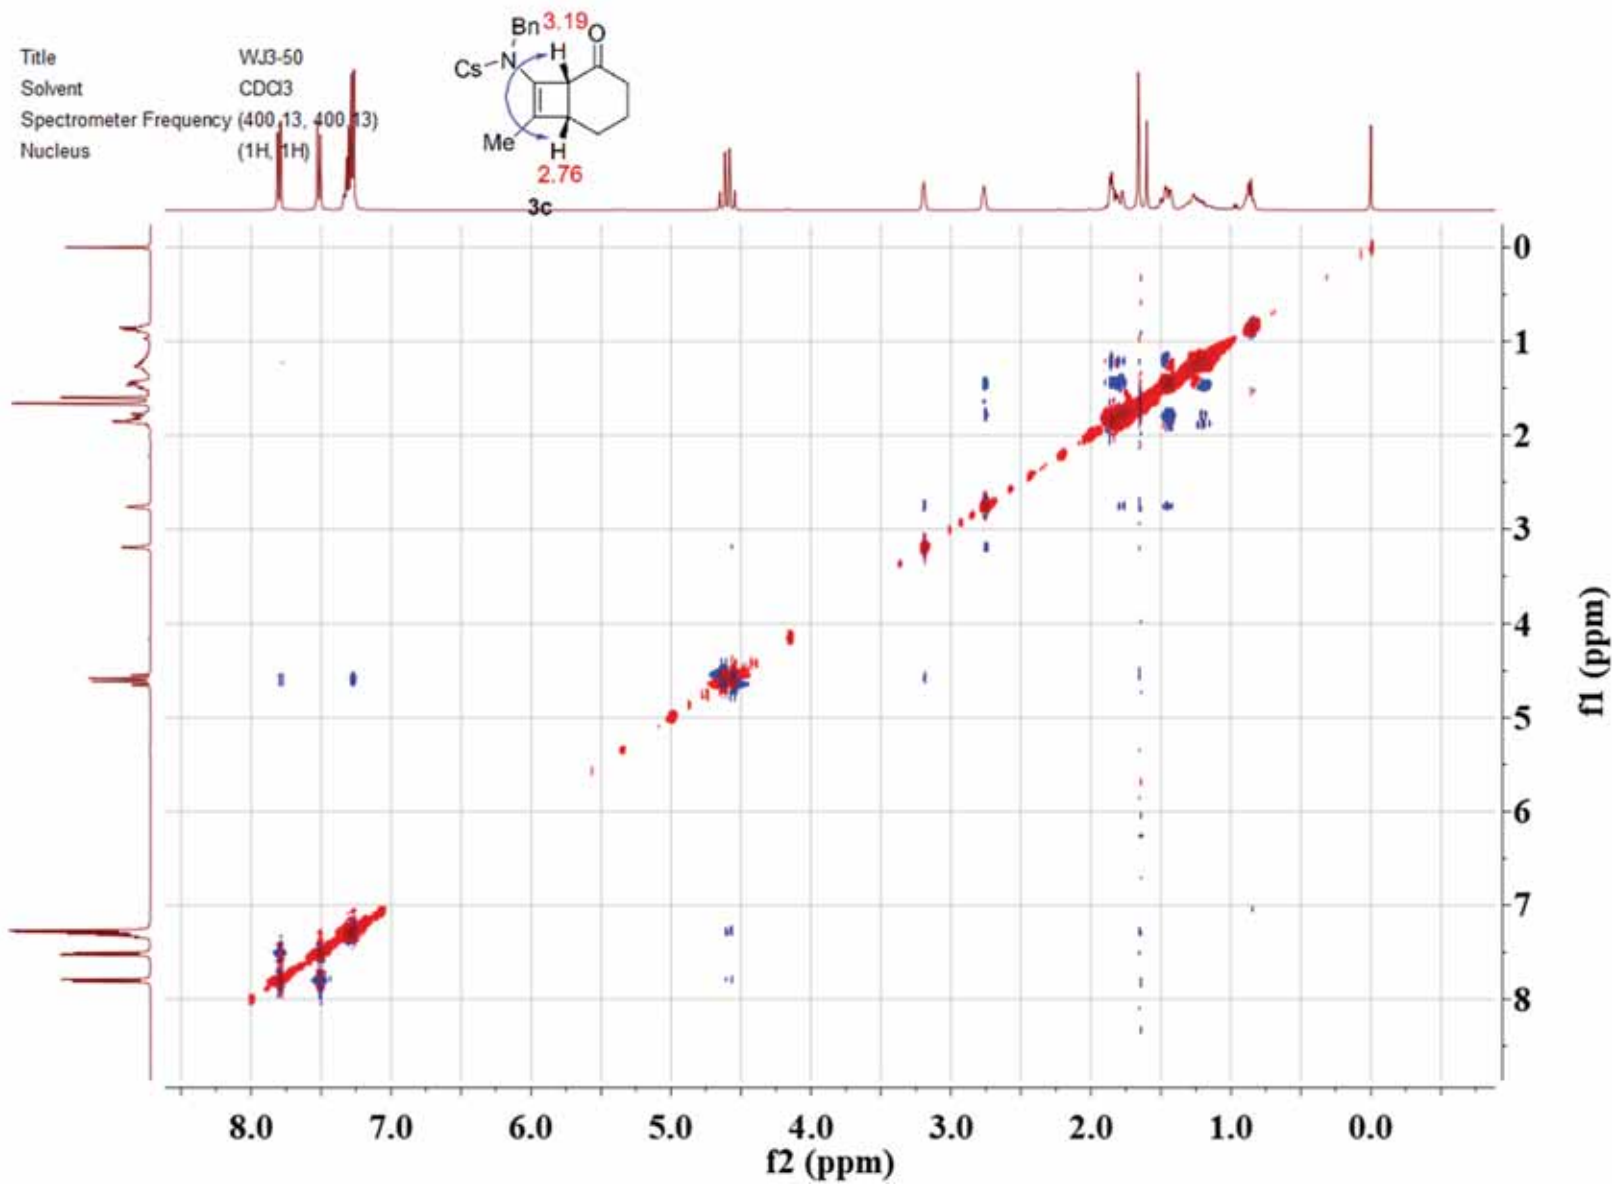

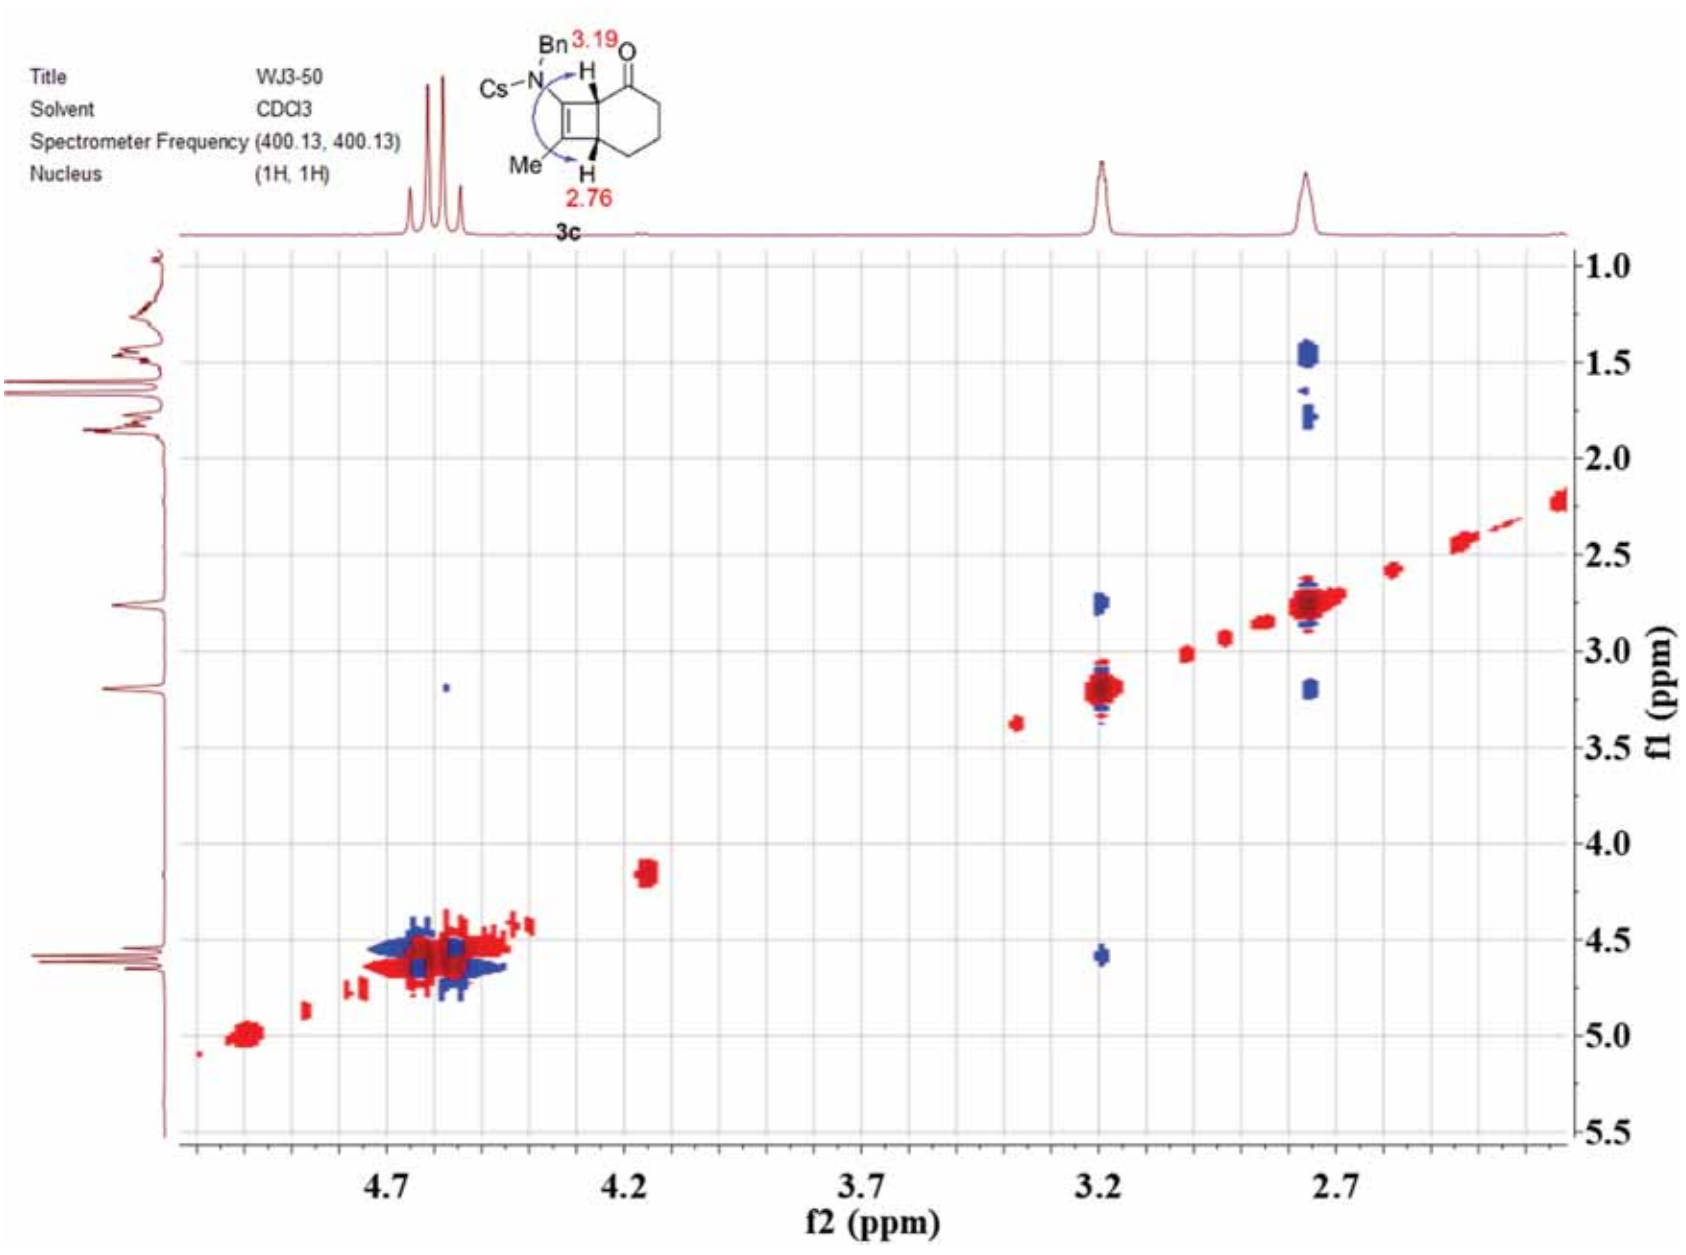

Title WJ3-74  
Solvent CDCl3  
Spectrometer Frequency (400.13, 400.13)  
Nucleus (1H, 1H)

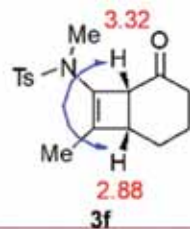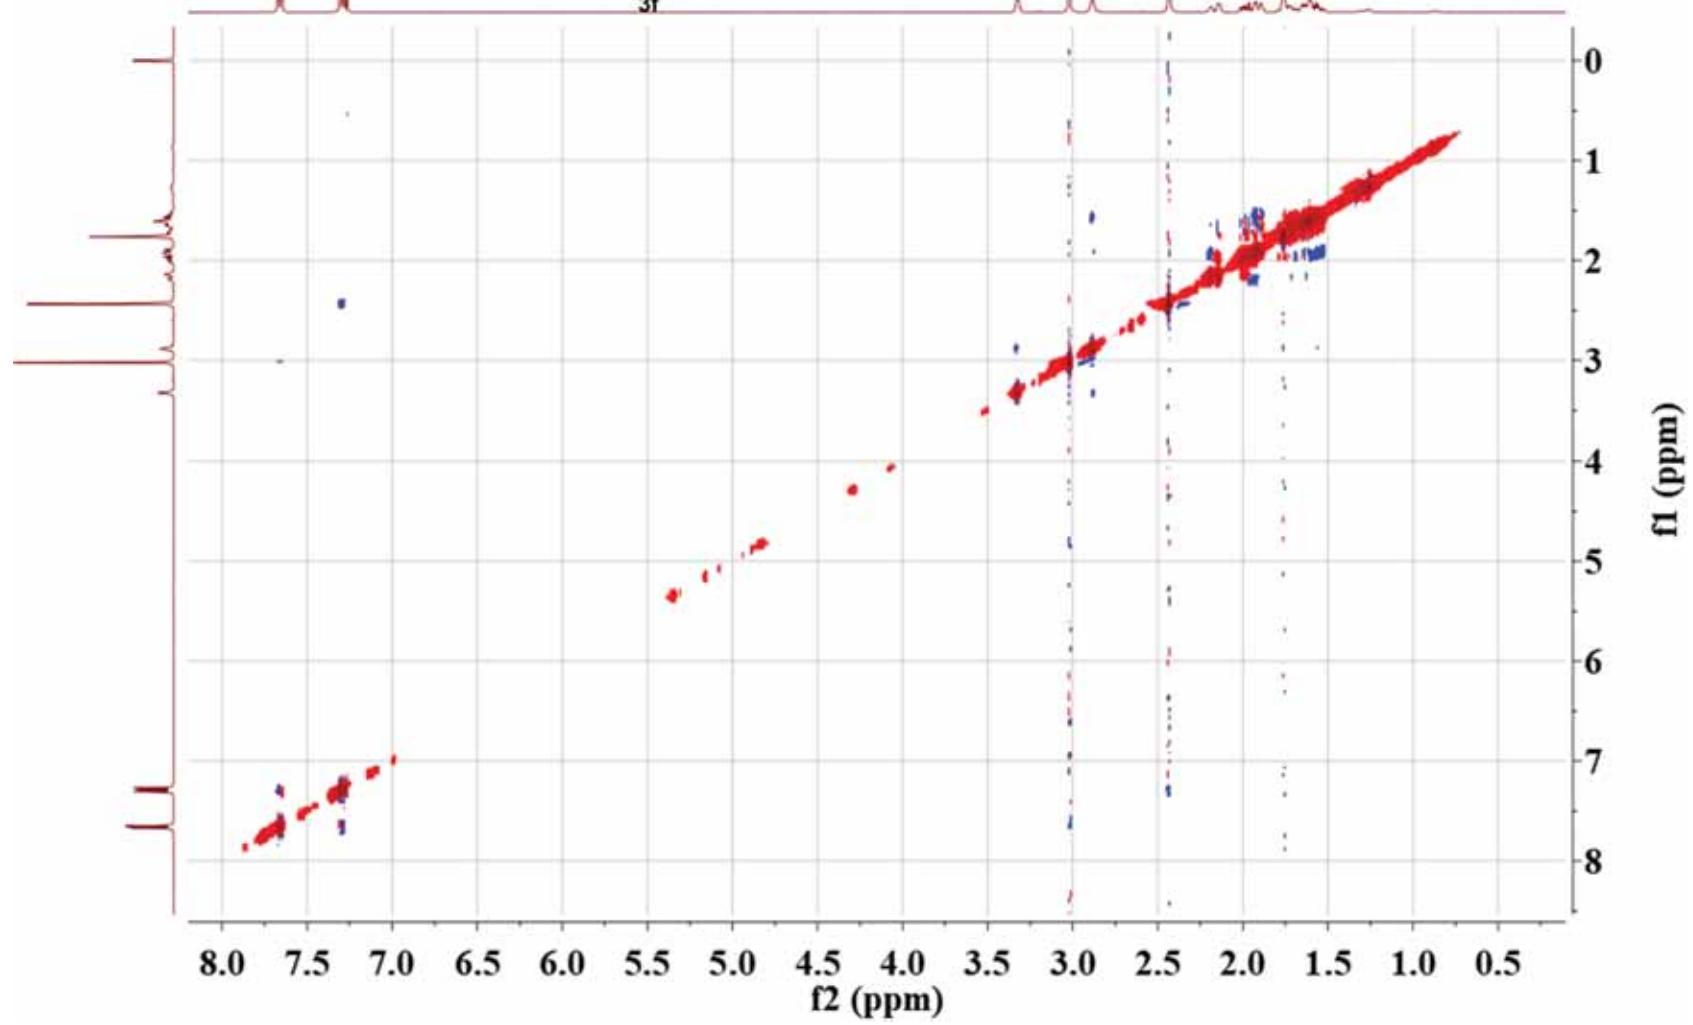

Title WJ3-74  
Solvent CDCl3  
Spectrometer Frequency (400.13, 400.13)  
Nucleus (1H, 1H)

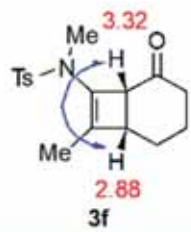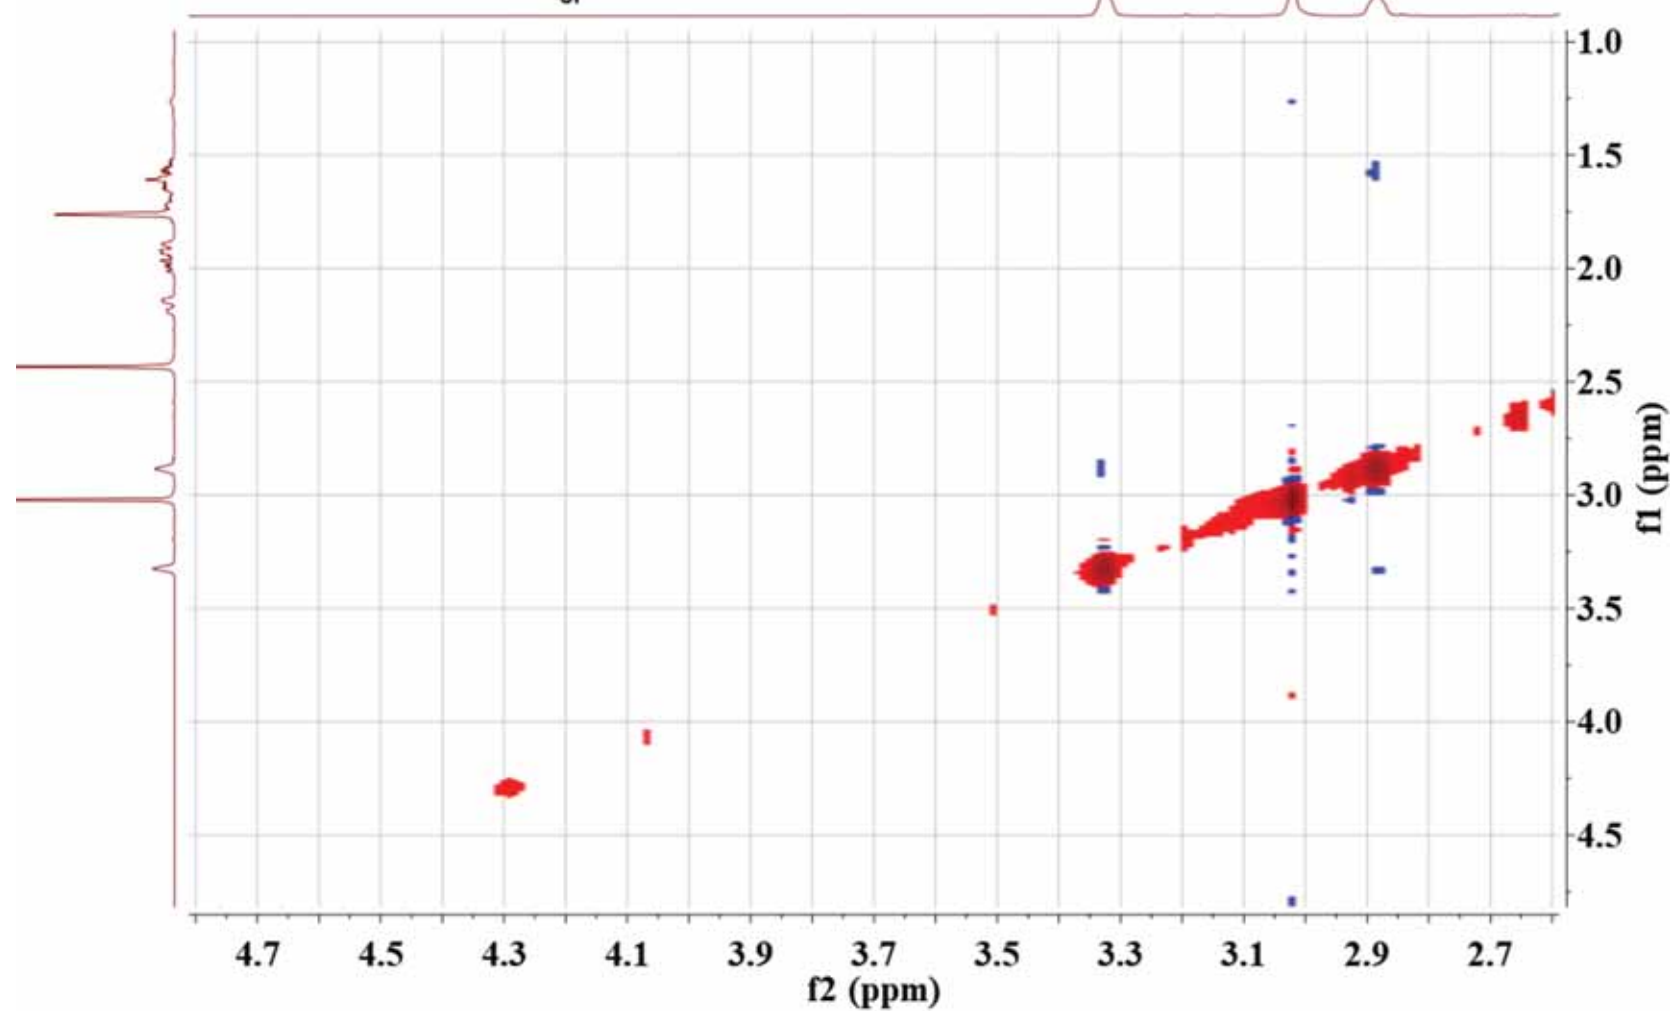

Title WJ4-11  
Solvent CDCl3  
Spectrometer Frequency (400.13, 400.13)  
Nucleus (1H, 1H)

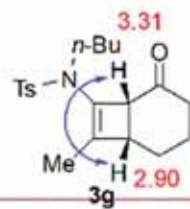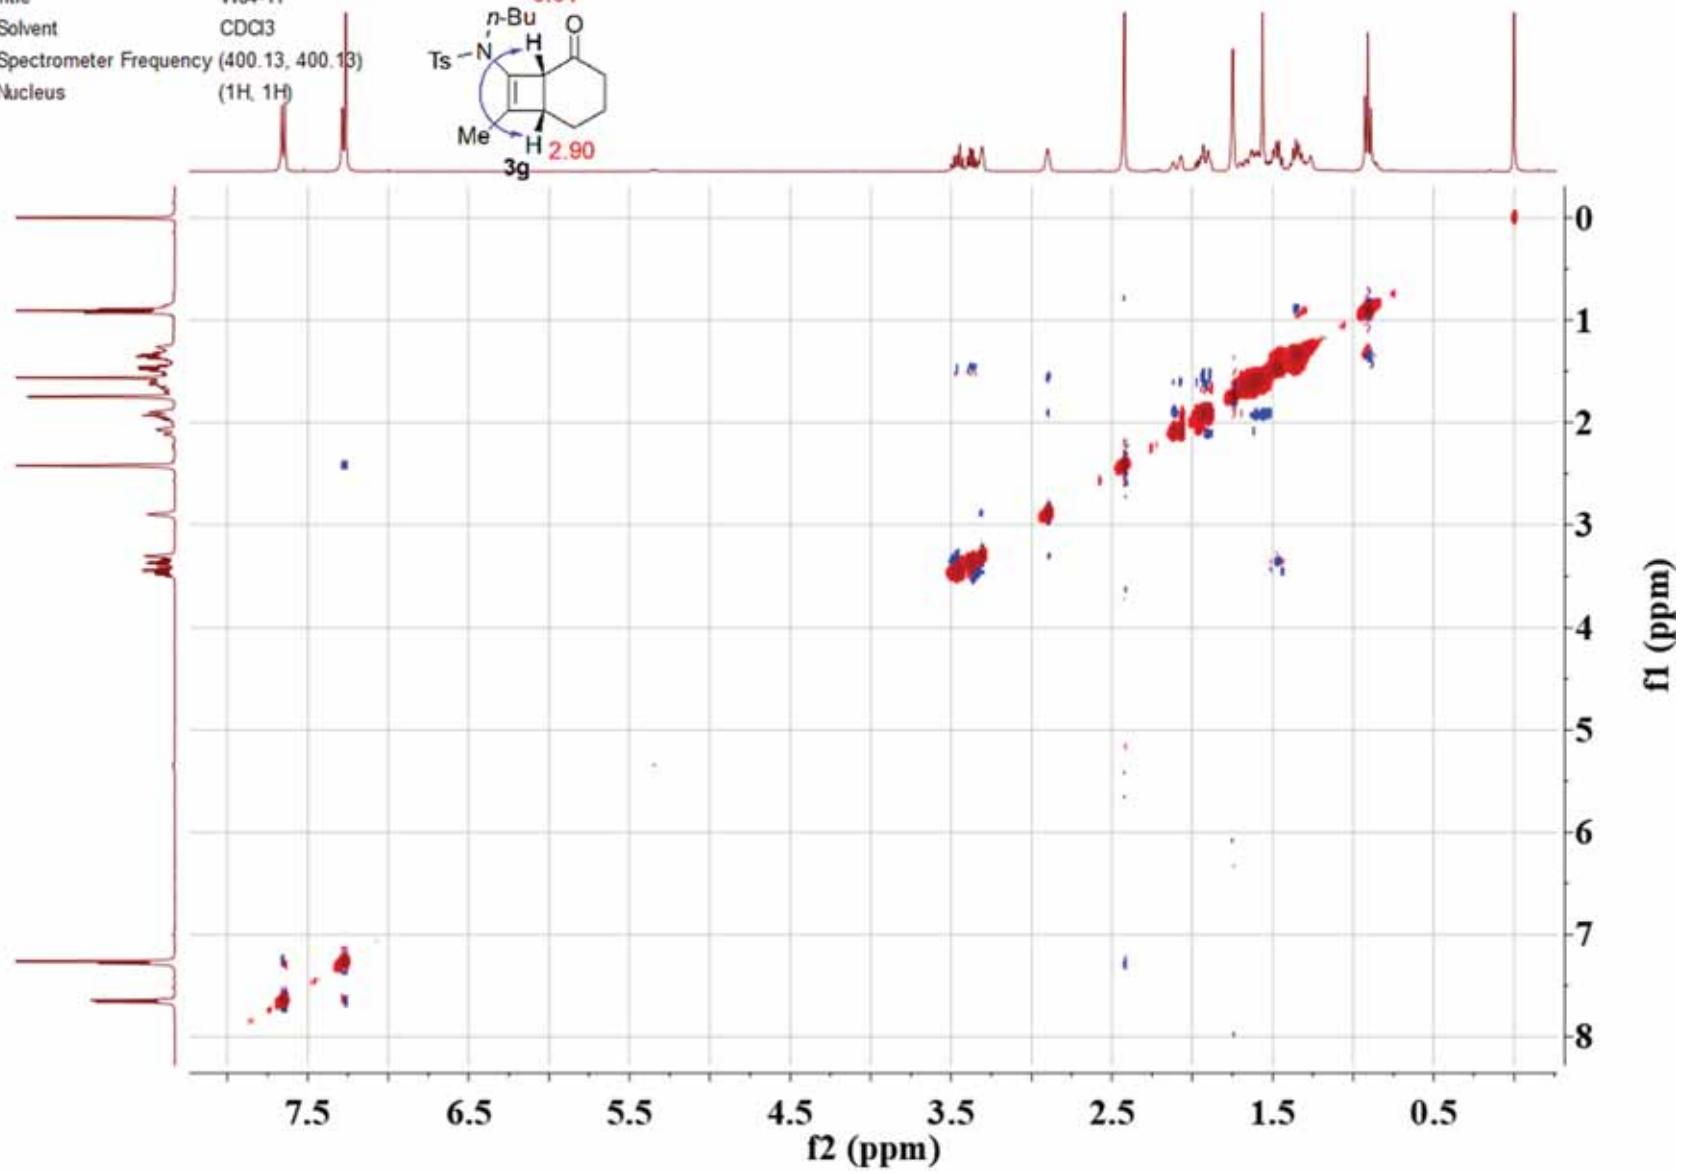

Title WJ4-11  
Solvent CDCl3  
Spectrometer Frequency (400.13, 400.13)  
Nucleus (1H, 1H)

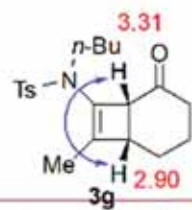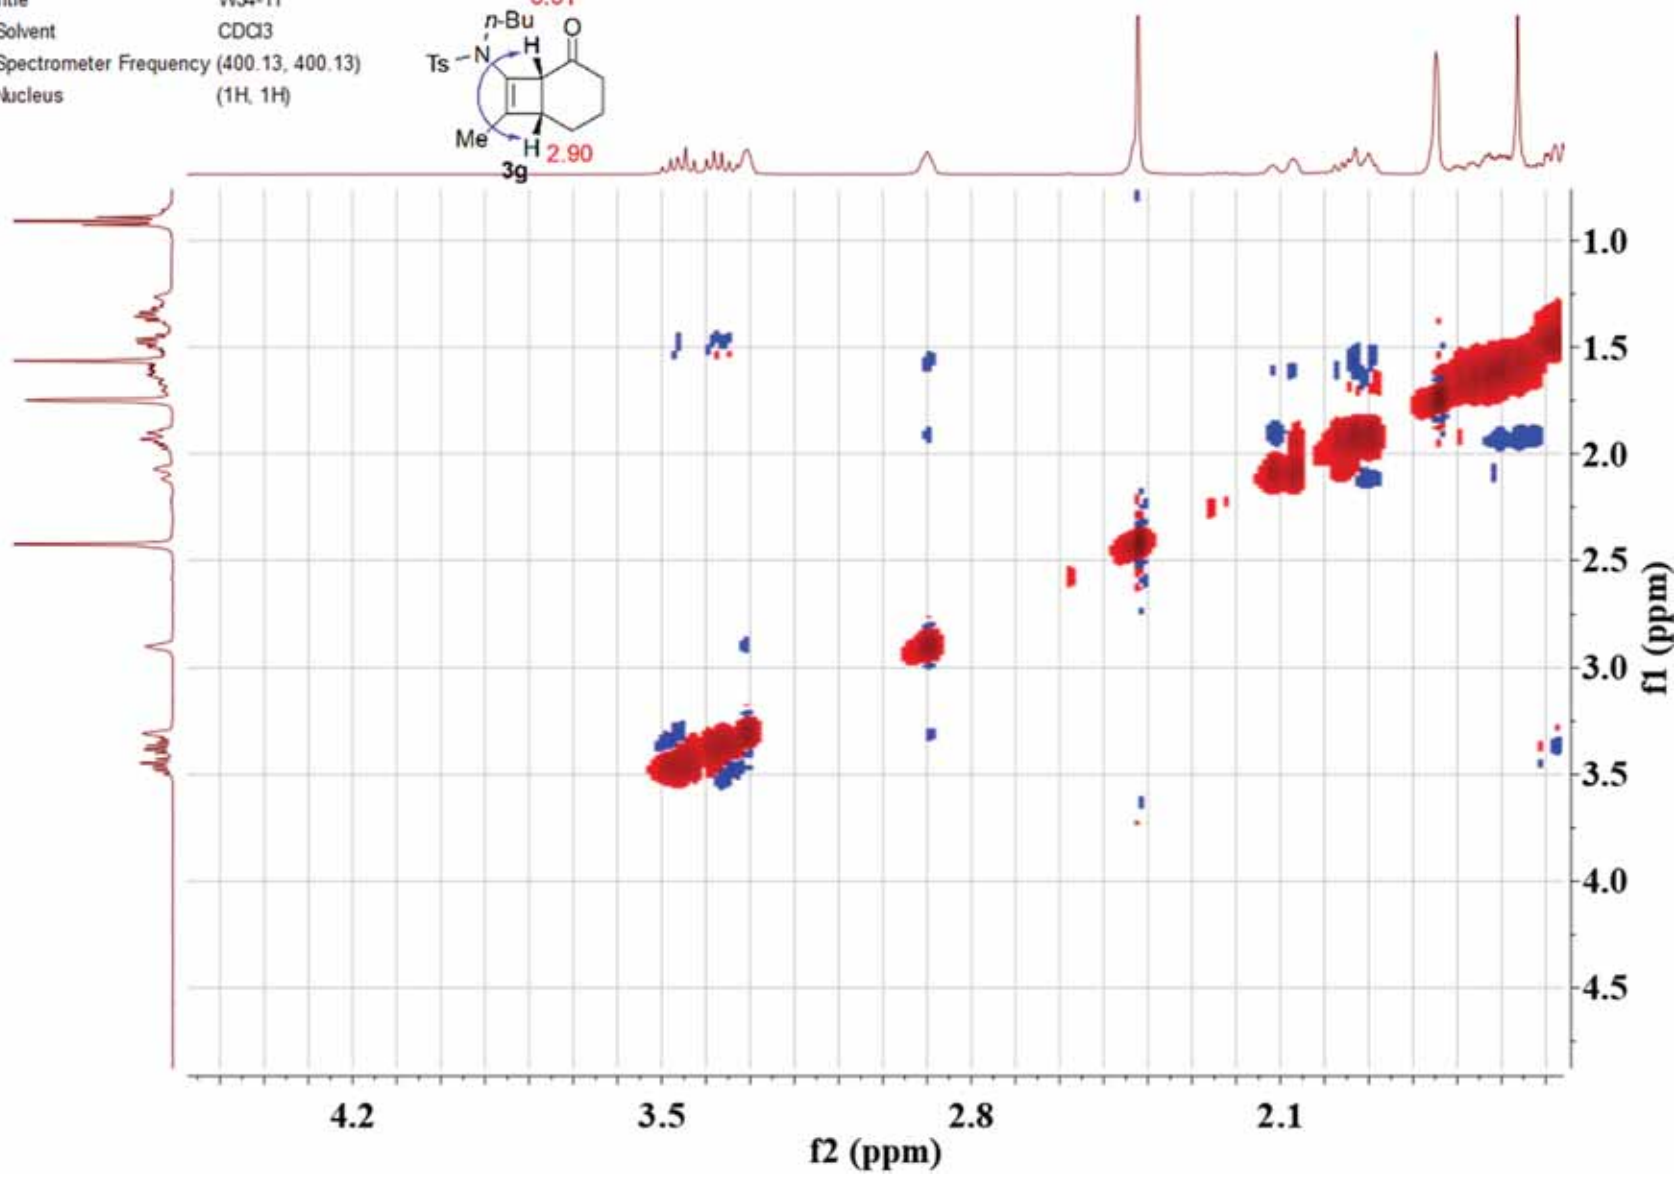

Title WJ4-7  
Solvent CDCl3  
Spectrometer Frequency (400.13, 400.13)  
Nucleus (1H, 1H)

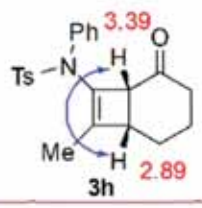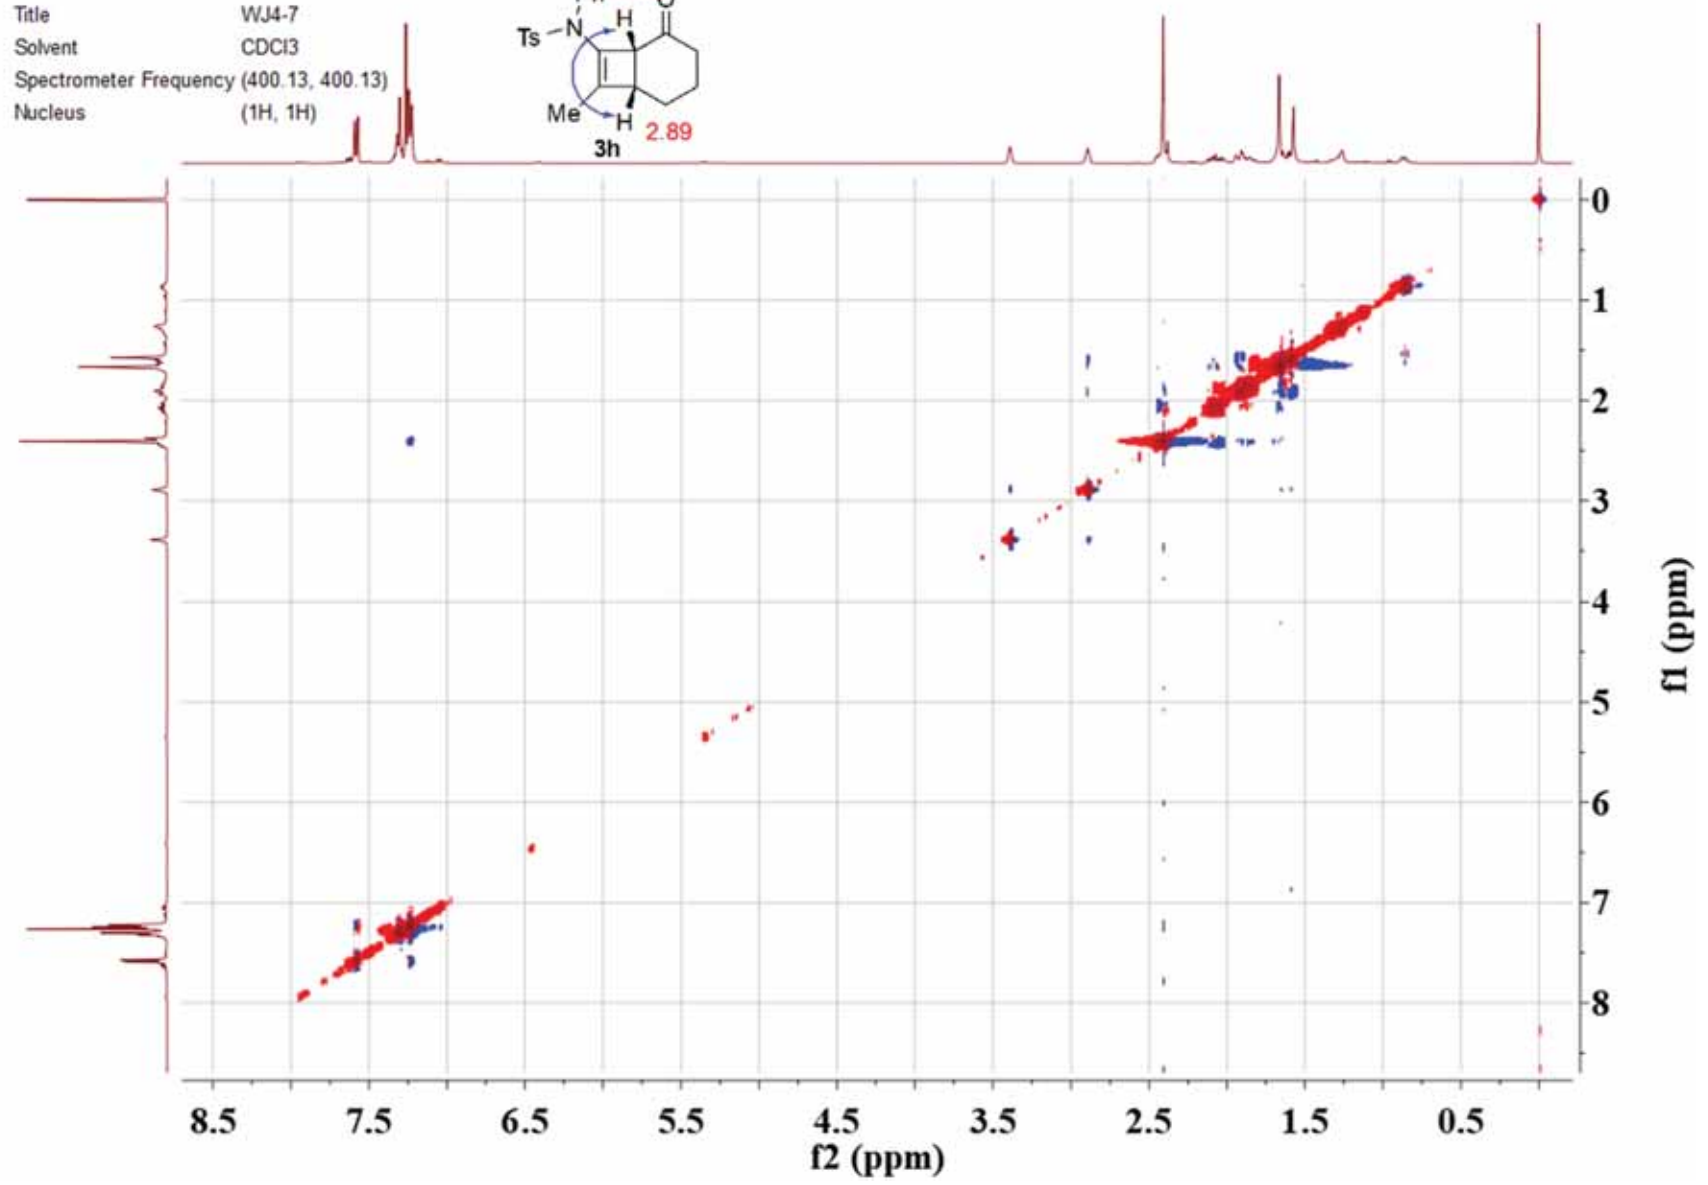

Title WJ4-7  
Solvent CDCl<sub>3</sub>  
Spectrometer Frequency (400.13, 400.13)  
Nucleus (1H, 1H)

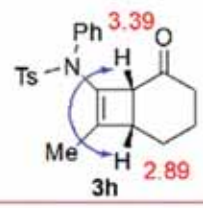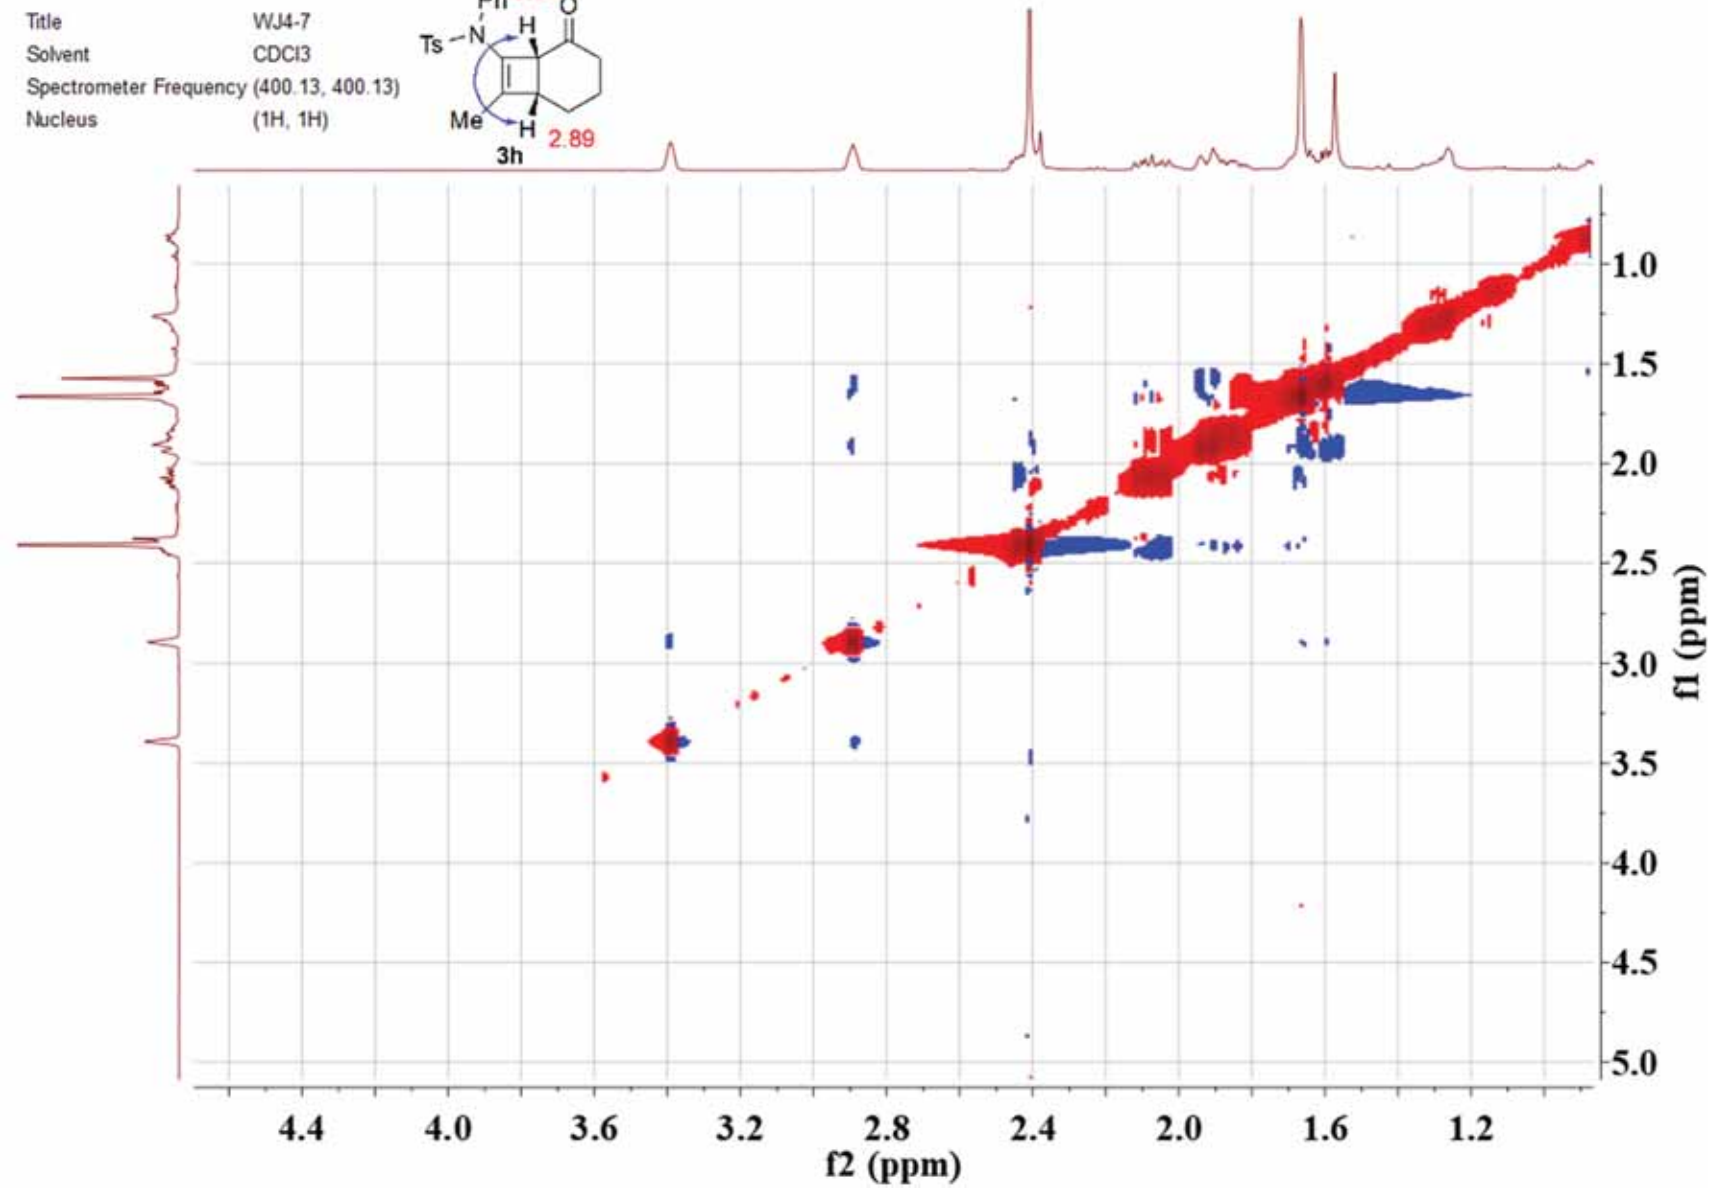



Title WJ3-71  
Solvent CDCl3  
Spectrometer Frequency (400.13, 400.13)  
Nucleus (1H, 1H)

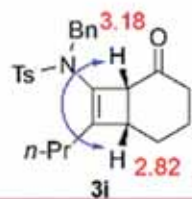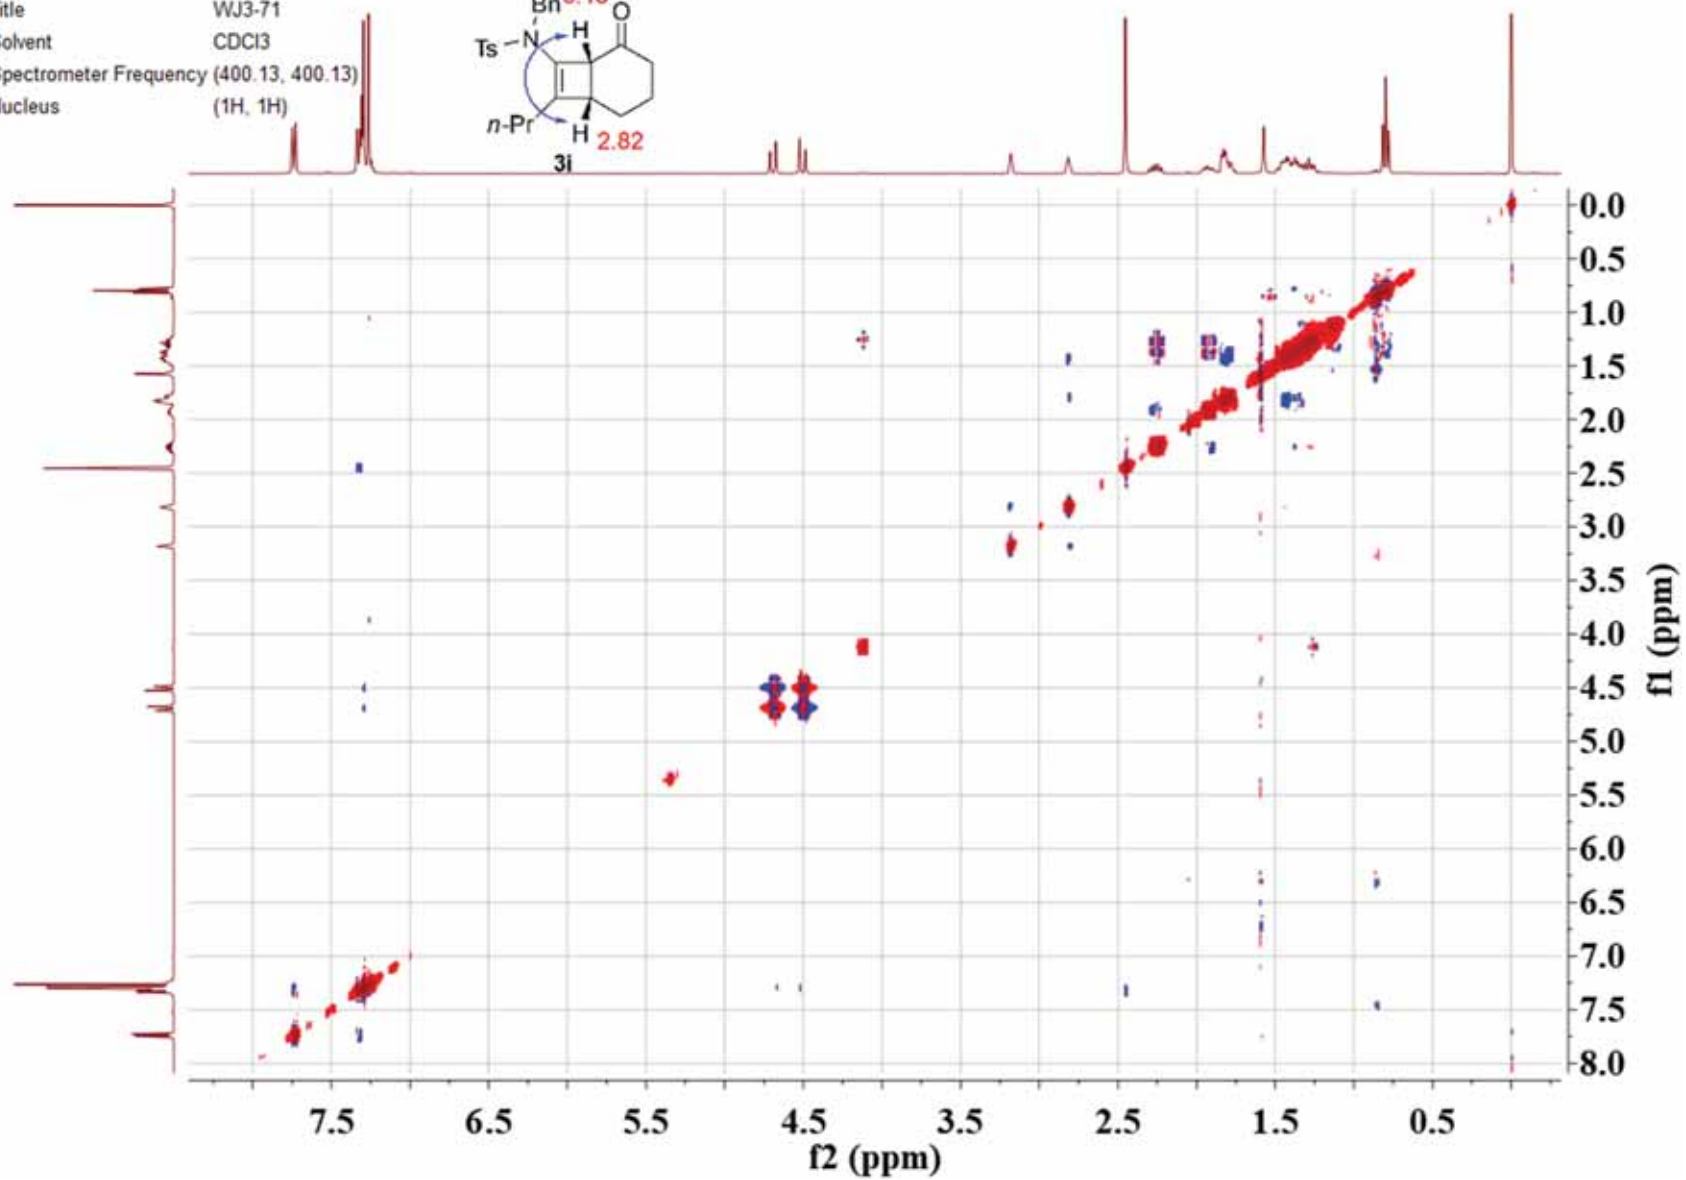

Title WJ3-71  
Solvent CDCl3  
Spectrometer Frequency (400.13, 400.13)  
Nucleus (1H, 1H)

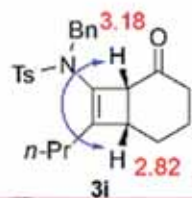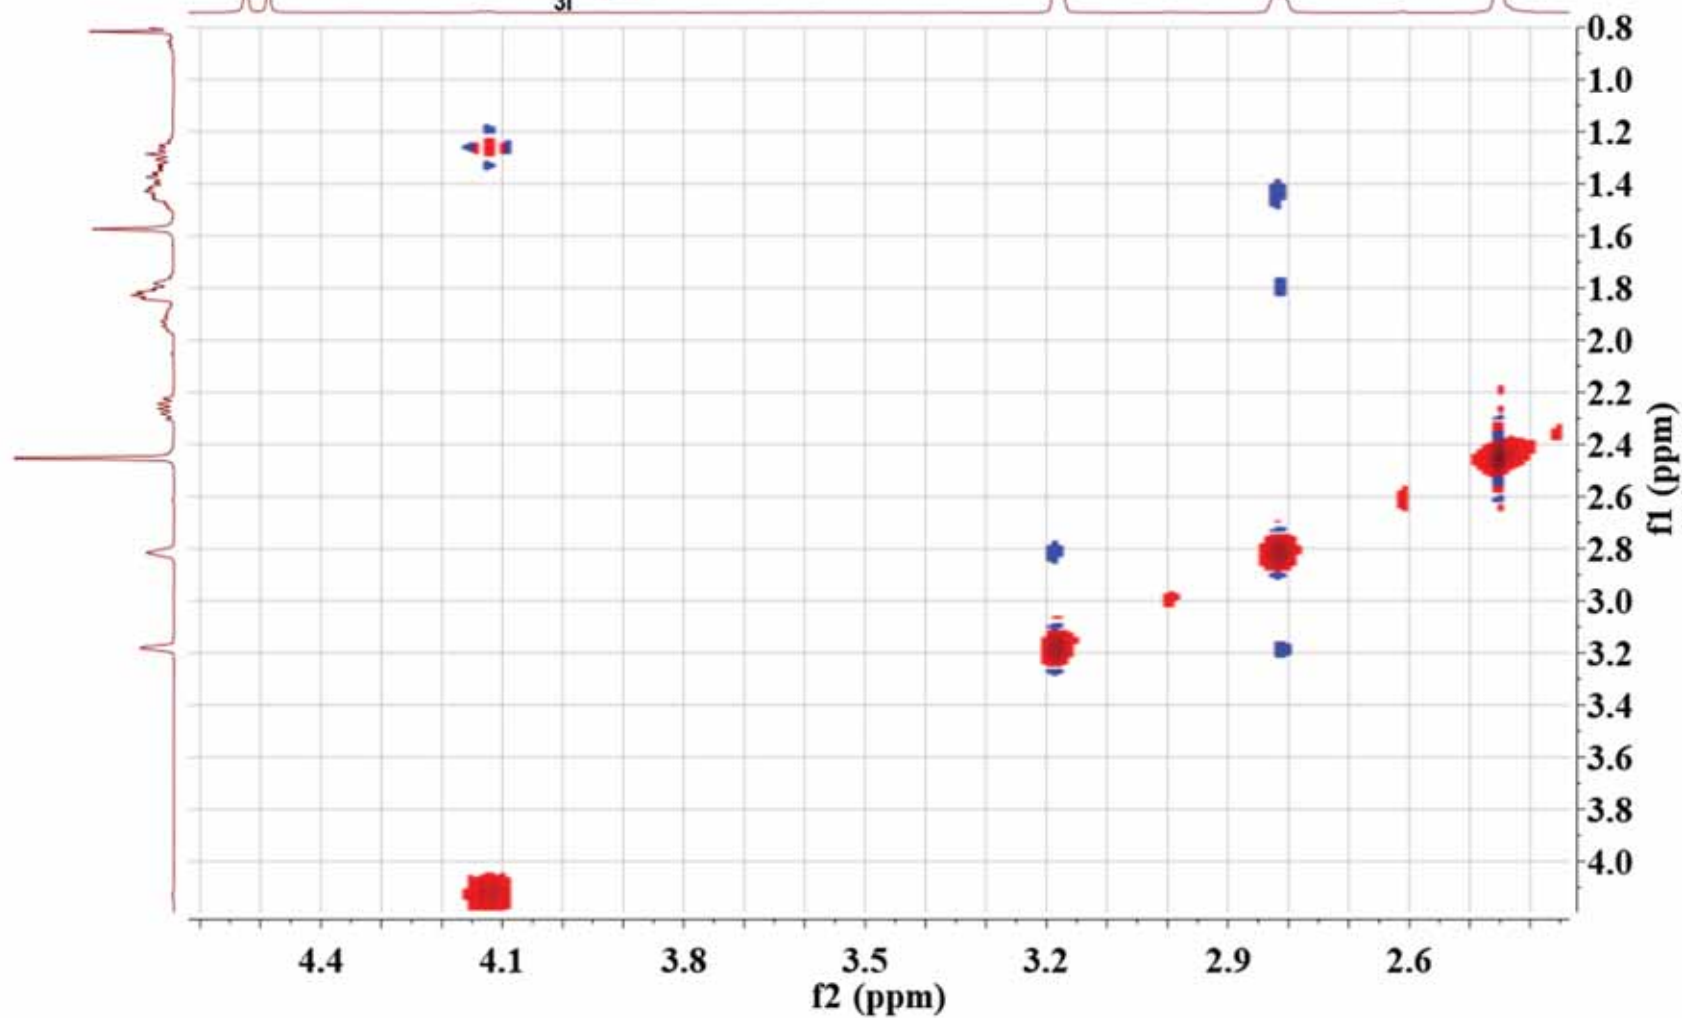

Title WJ3-73  
Solvent CDCl3  
Spectrometer Frequency (400.13, 400.13)  
Nucleus (1H, 1H)

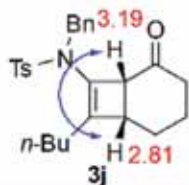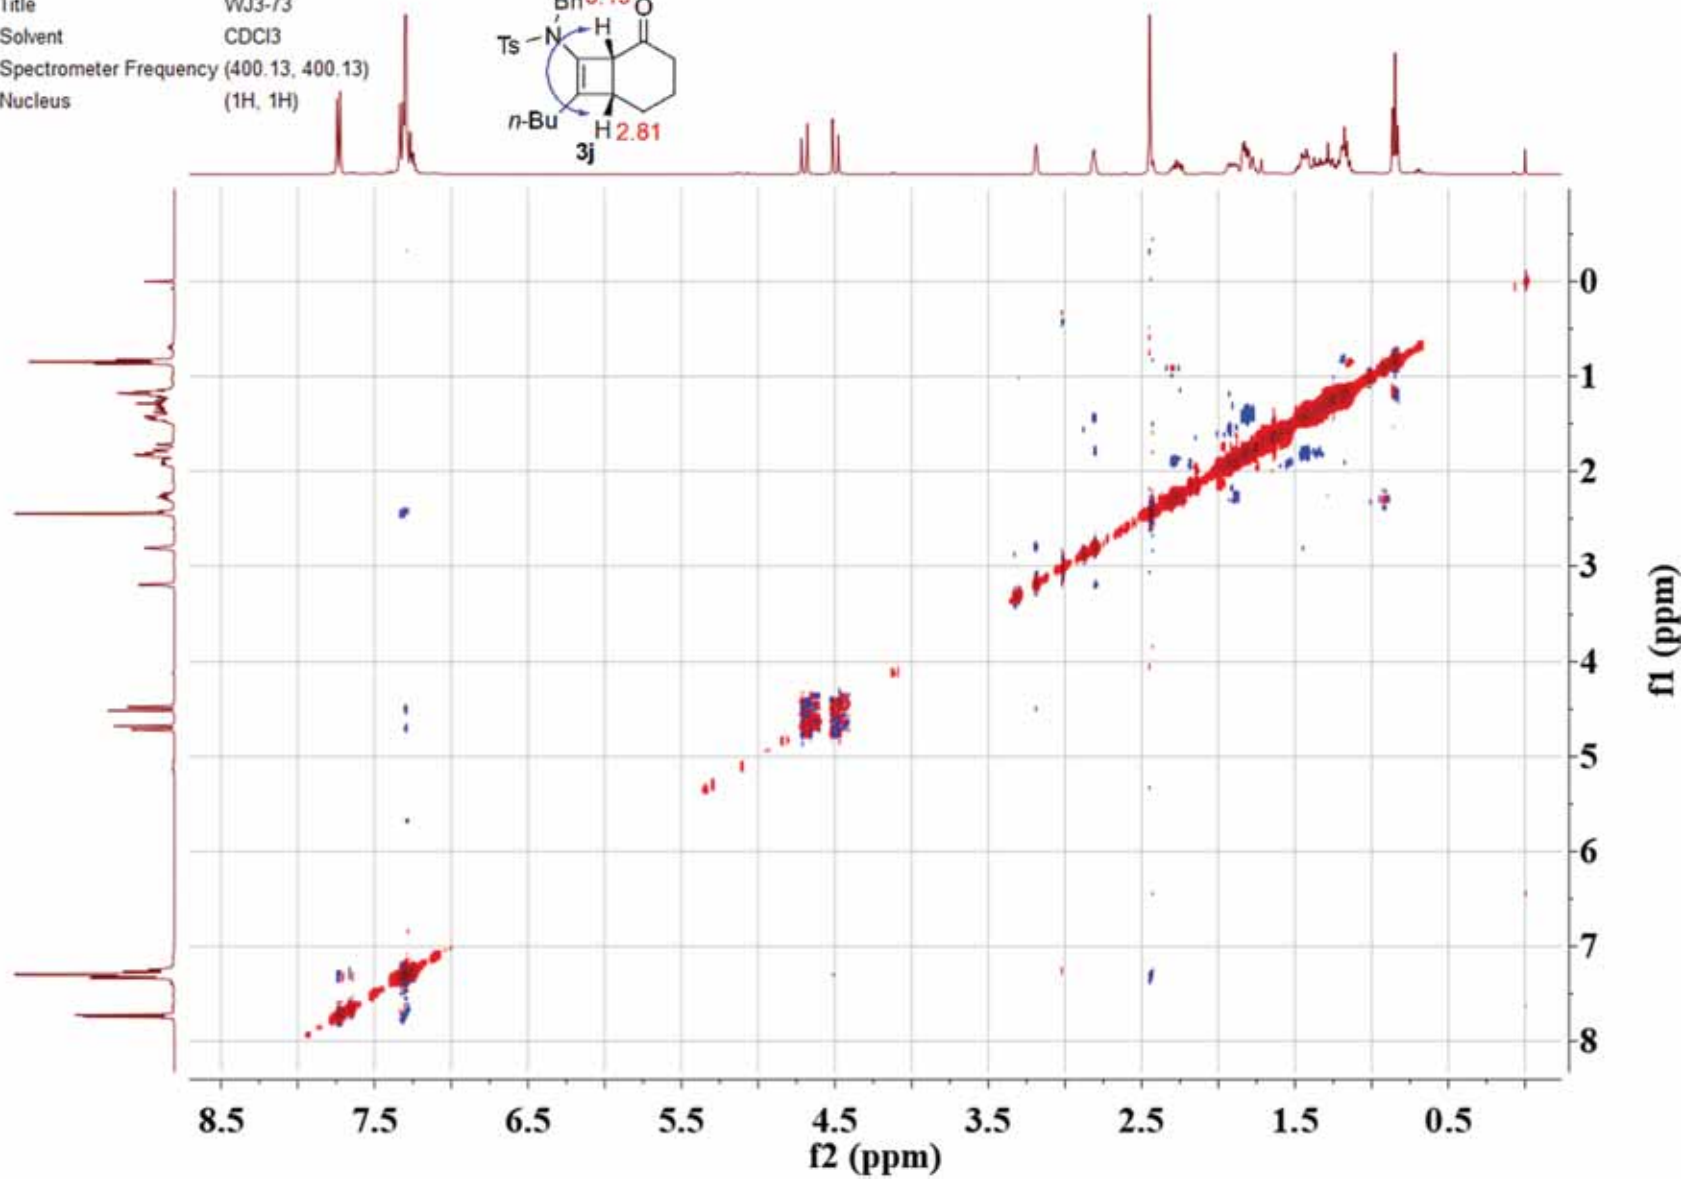

Title WJ3-73  
Solvent CDCl3  
Spectrometer Frequency (400.13, 400.13)  
Nucleus (1H, 1H)

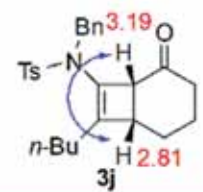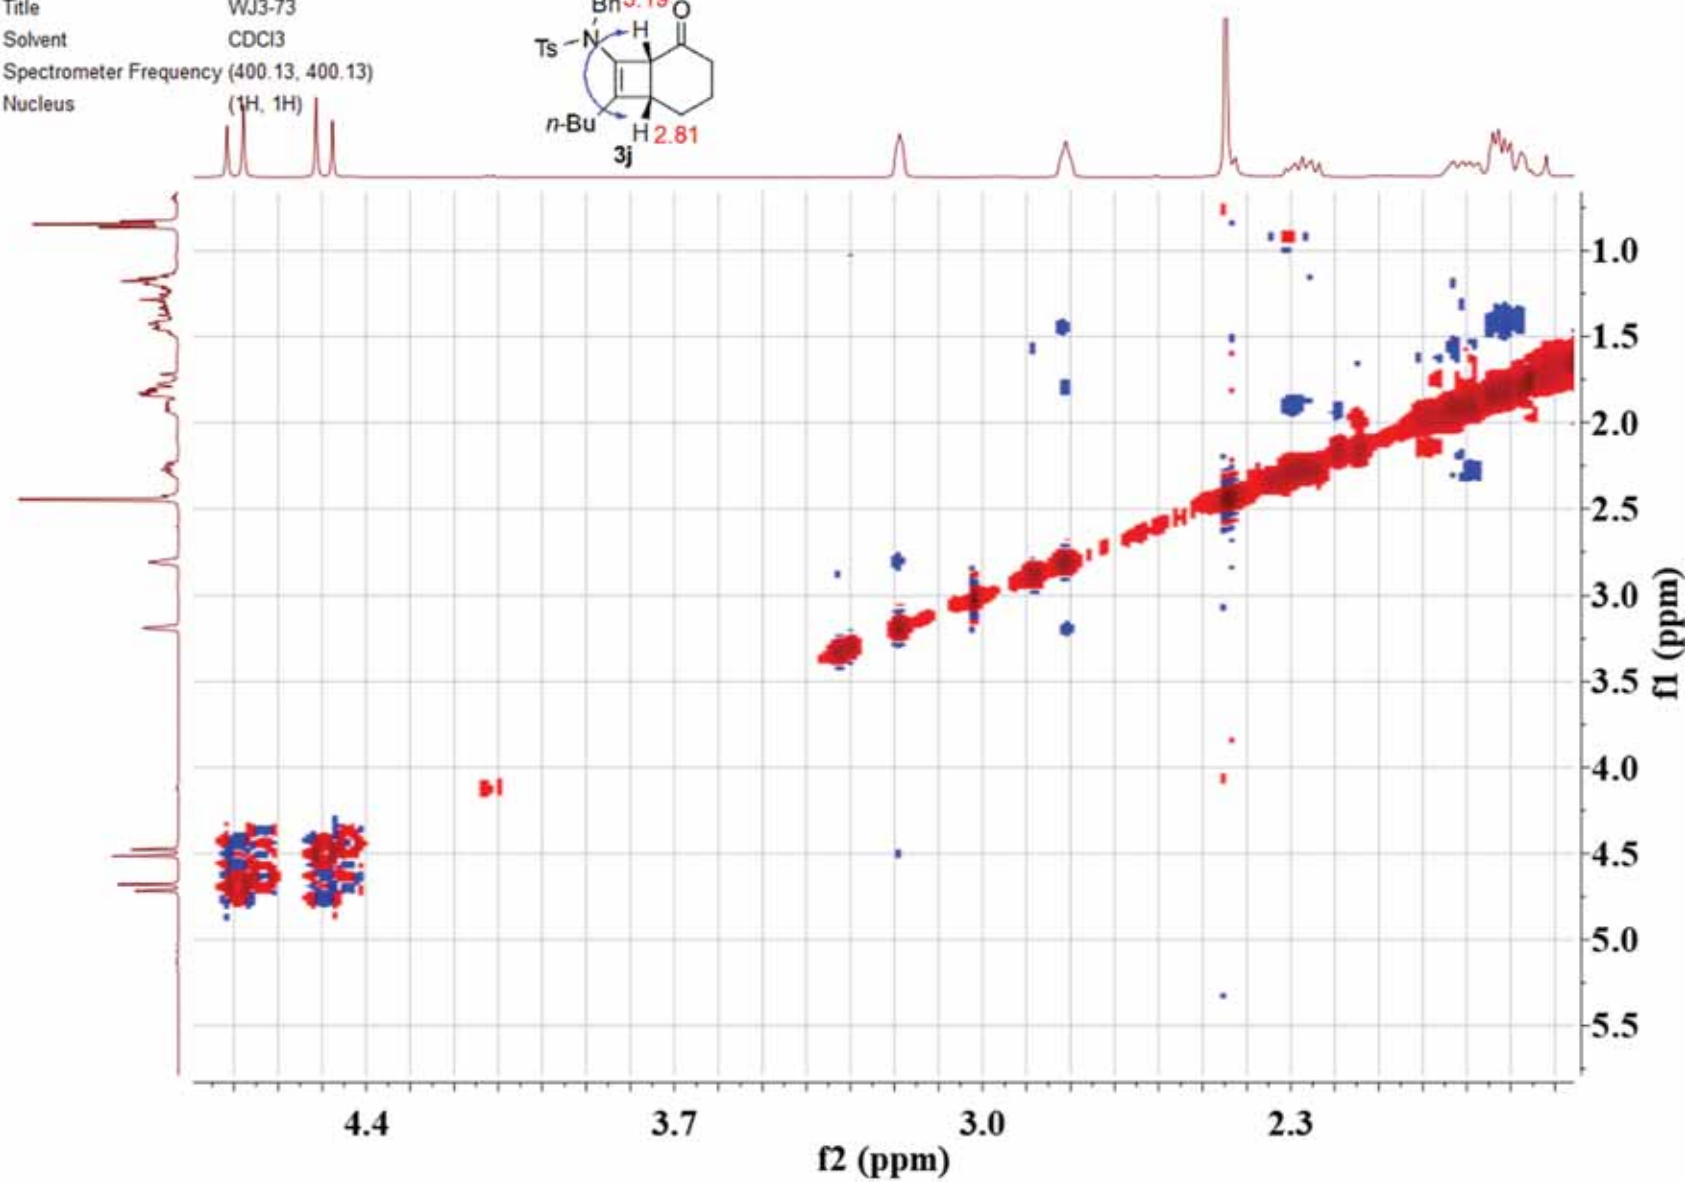

Title WJ3-70  
Solvent CDCl3  
Spectrometer Frequency (400.13, 400.13)  
Nucleus (1H, 1H)

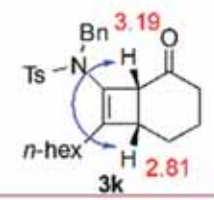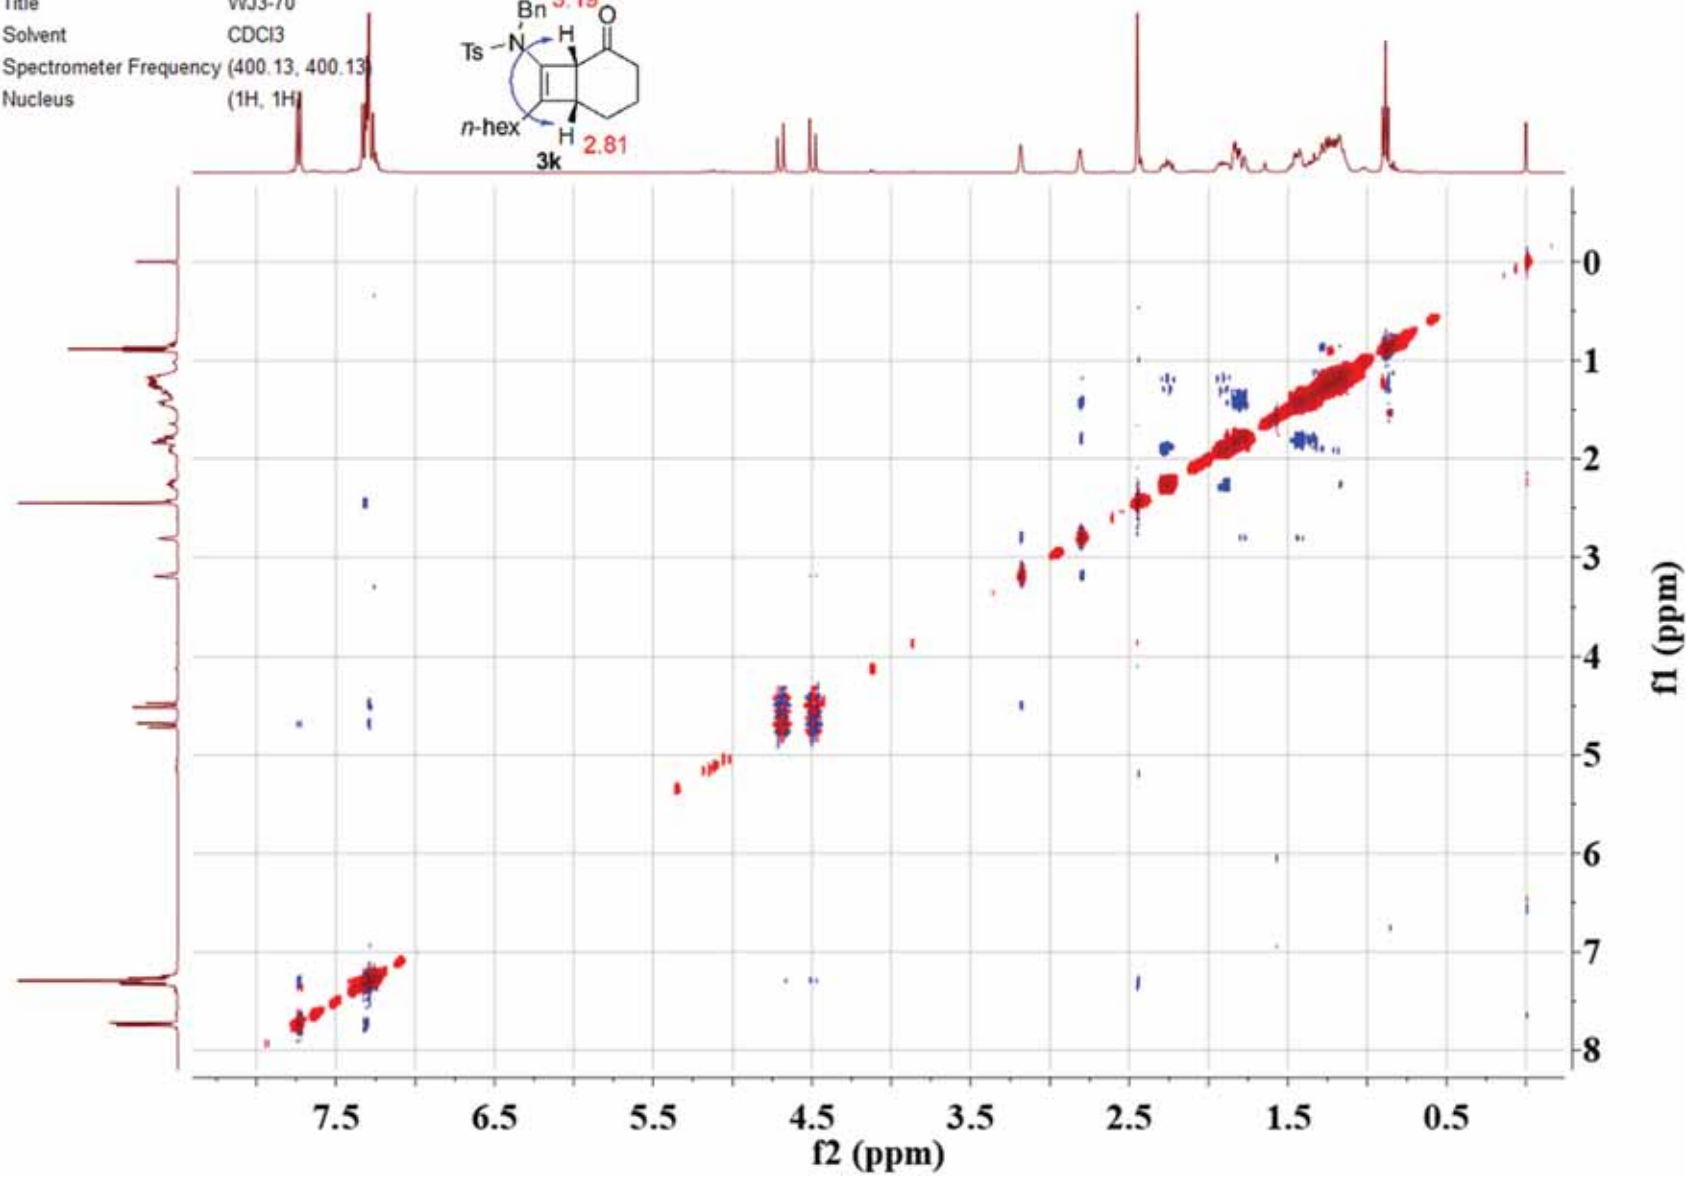

Title WJ3-70  
Solvent CDCl3  
Spectrometer Frequency (400.13, 400.13)  
Nucleus (1H, 1H)

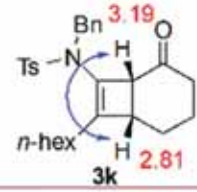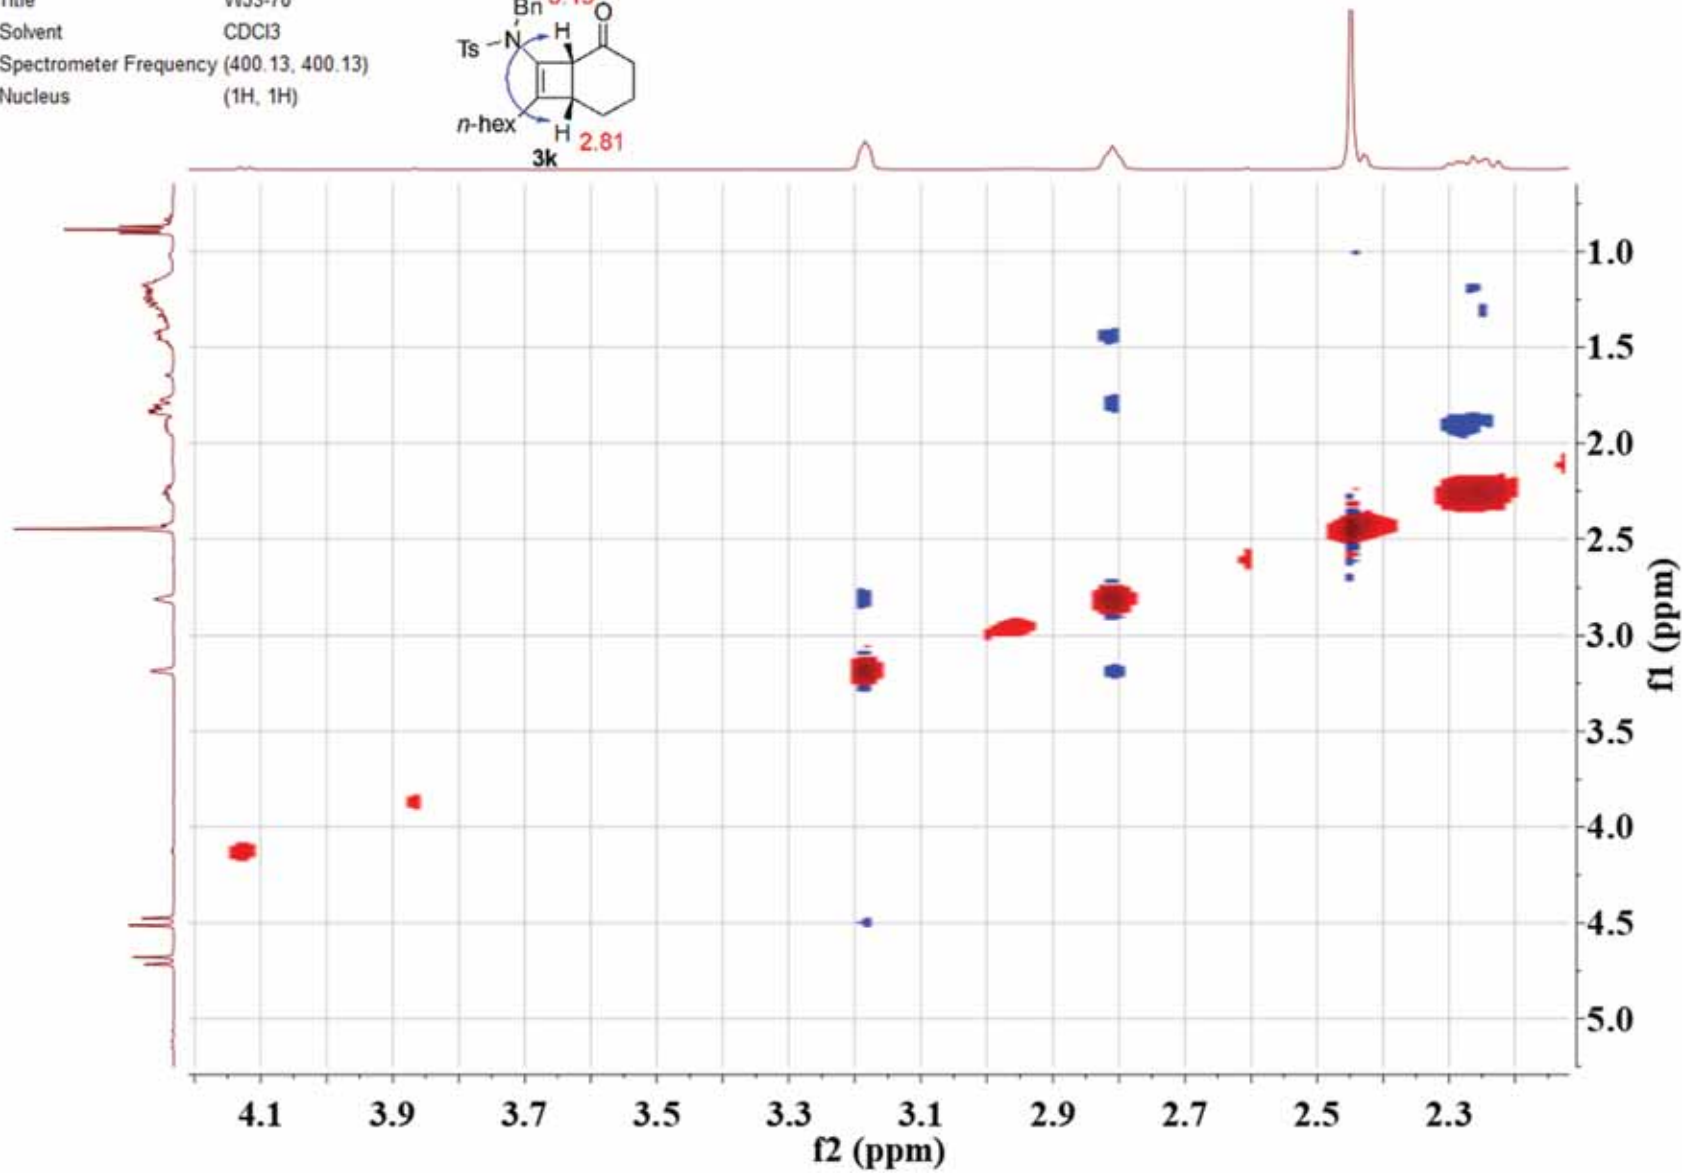

Title WJ3-67  
Solvent CDCl3  
Spectrometer Frequency (400.13, 400.13)  
Nucleus (1H, 1H)

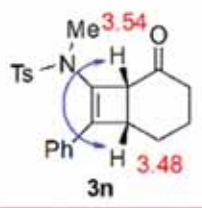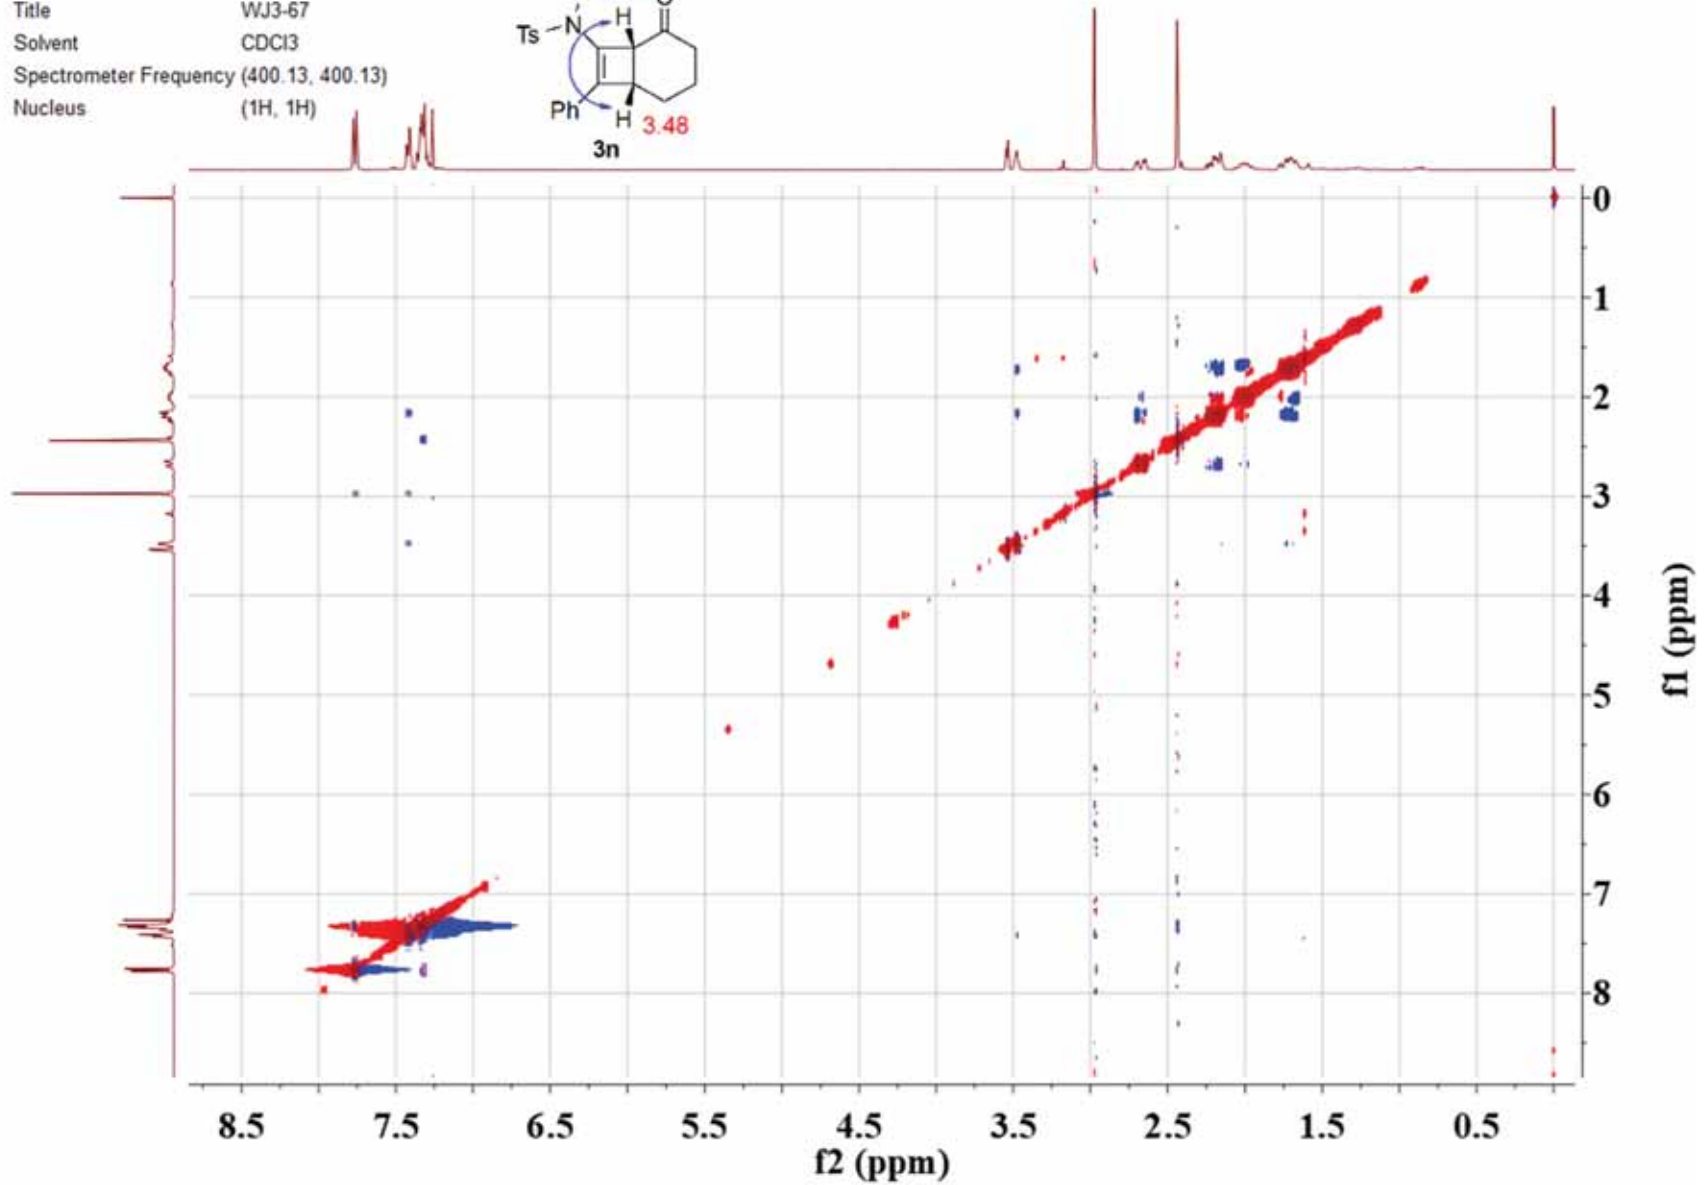

Title WJ3-67  
Solvent CDCl3  
Spectrometer Frequency (400.13, 400.13)  
Nucleus (1H, 1H)

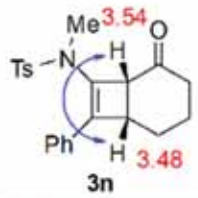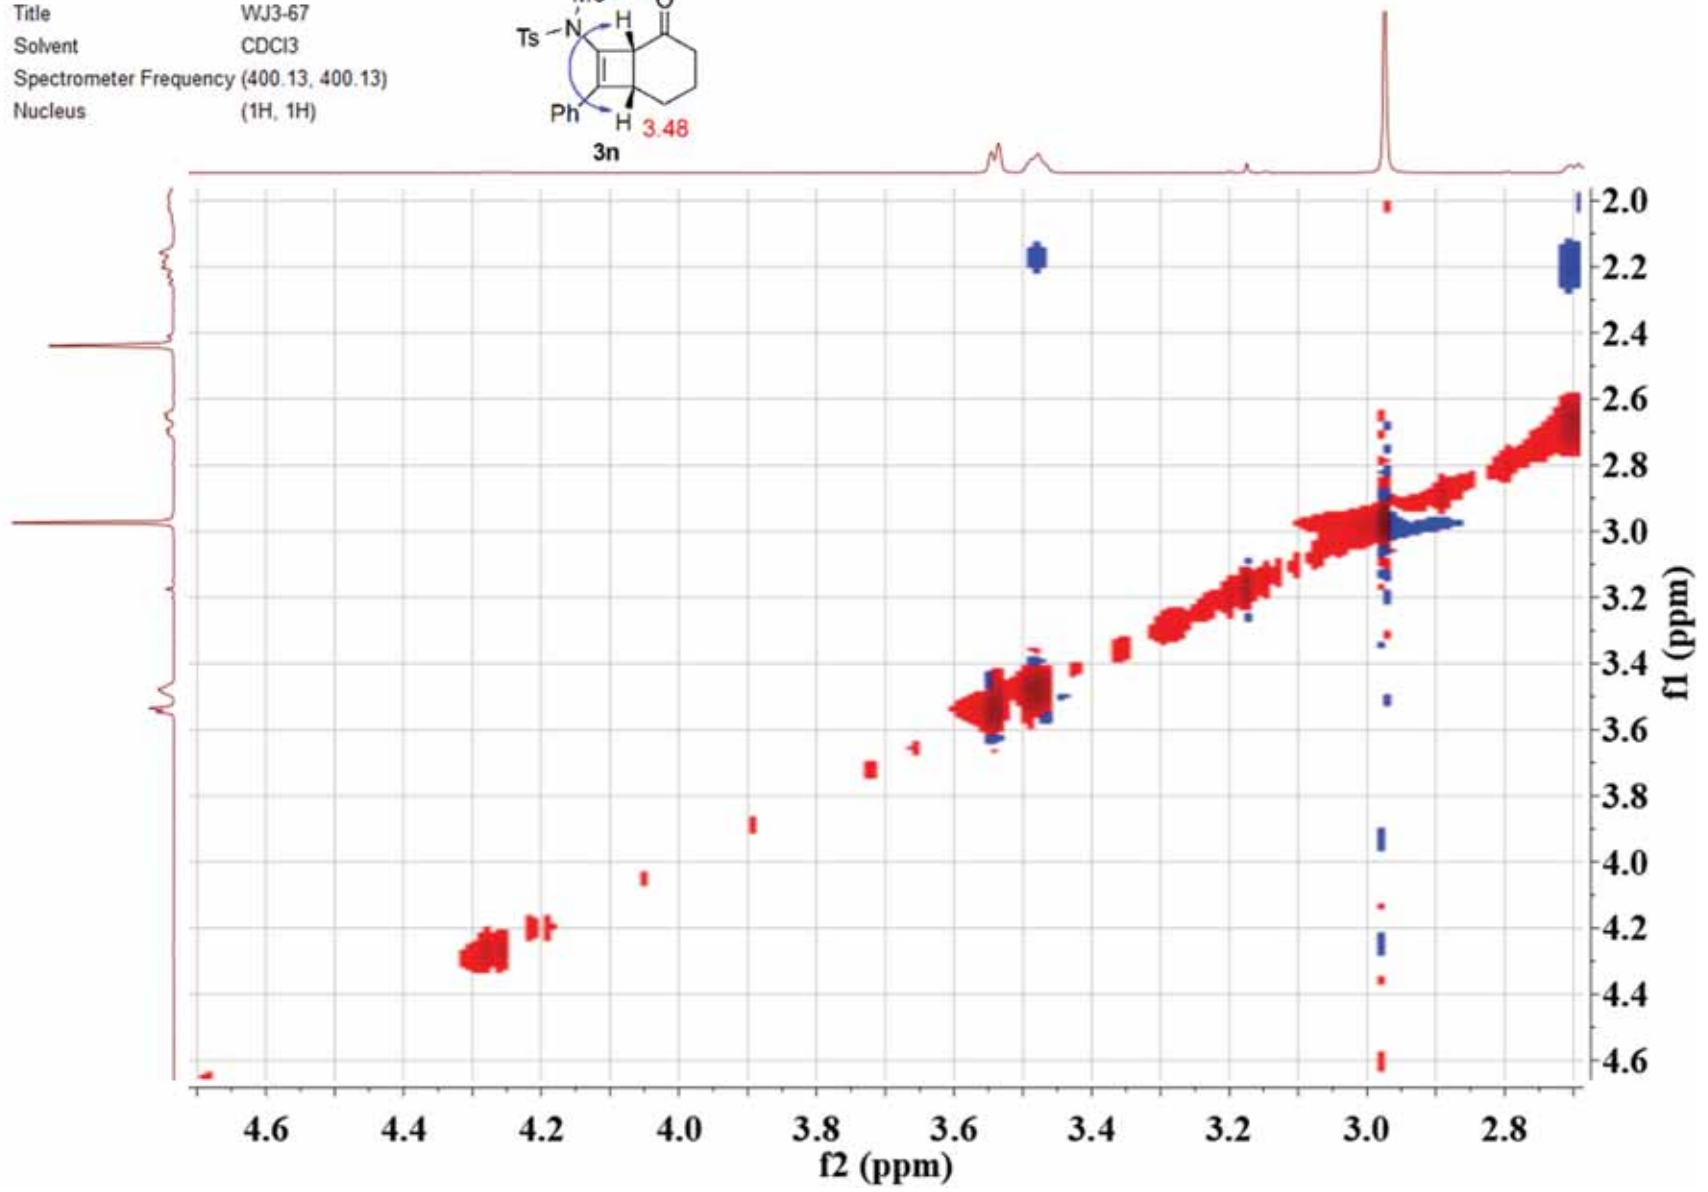



Title WJ4-27  
Solvent CDCl3  
Spectrometer Frequency (400.13, 400.13)  
Nucleus (1H, 1H)

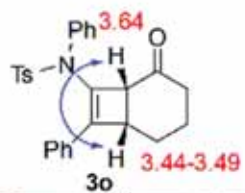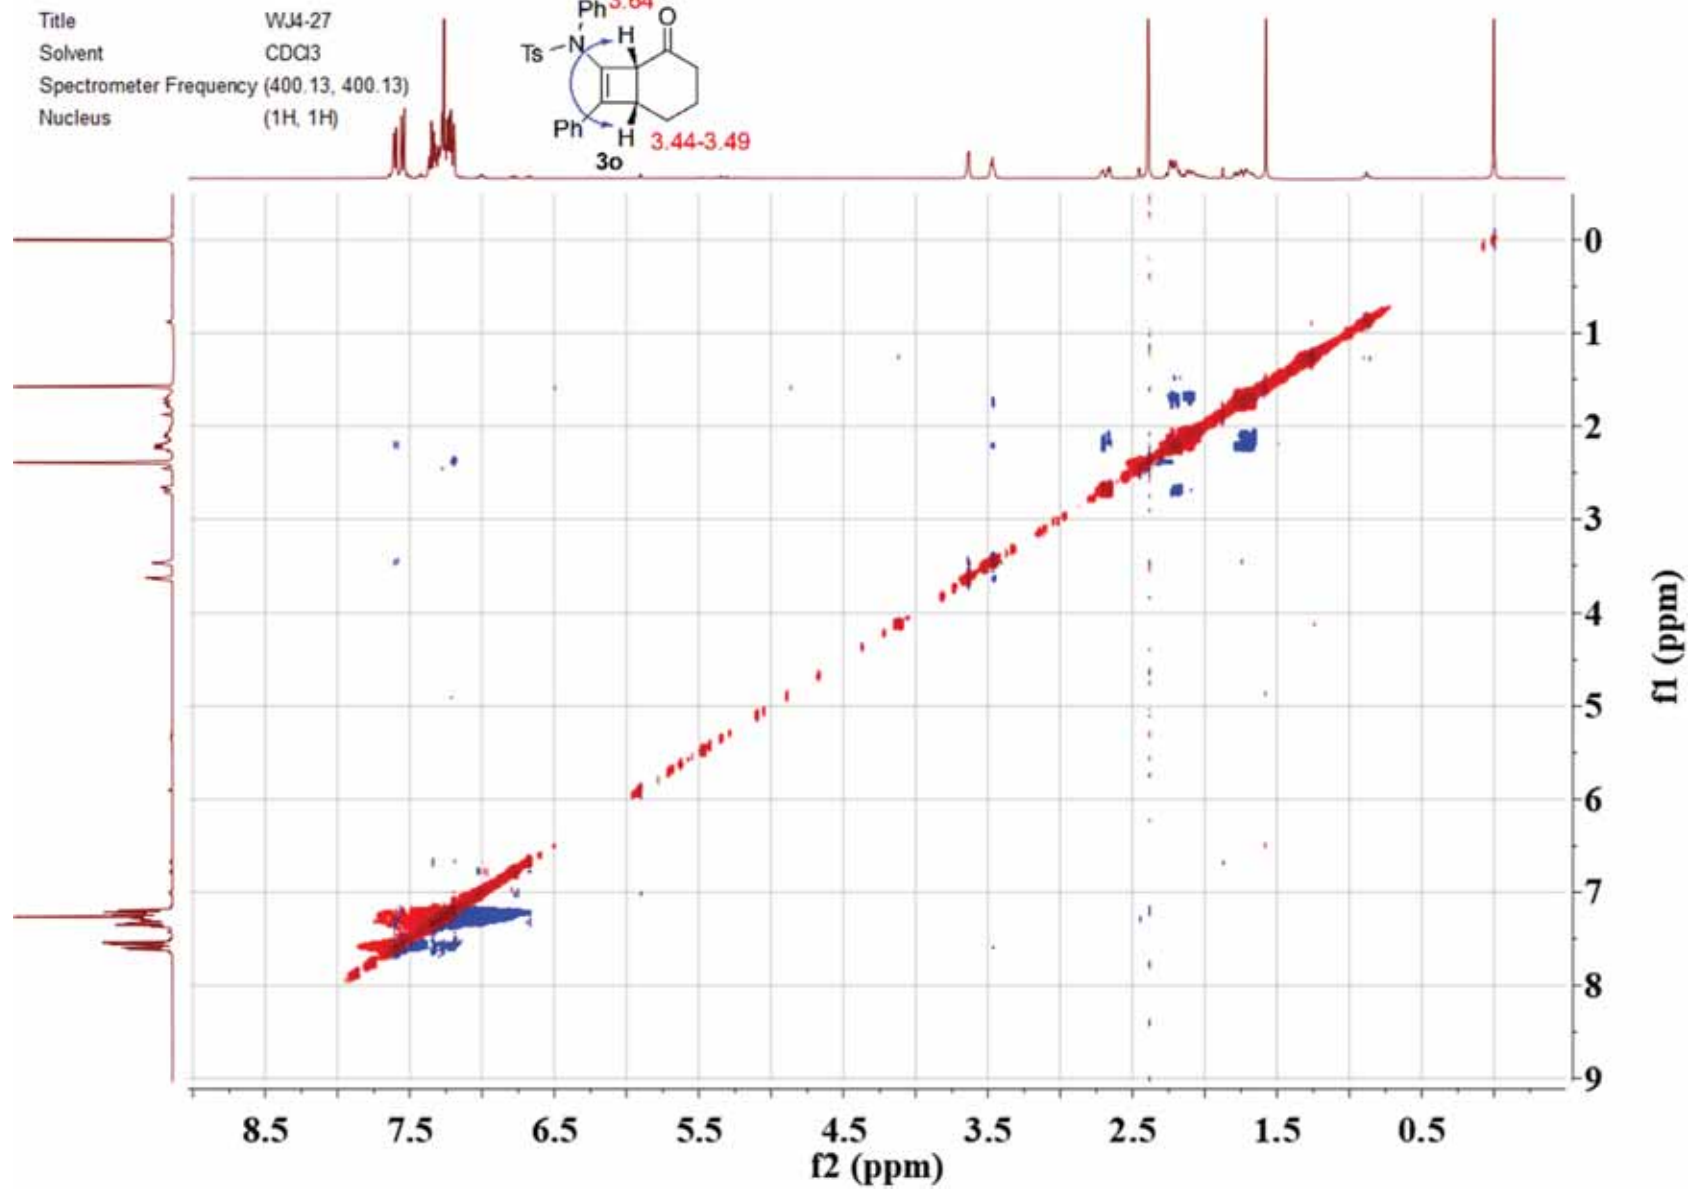

Title WJ4-27  
Solvent CDCl3  
Spectrometer Frequency (400.13, 400.13)  
Nucleus (1H, 1H)

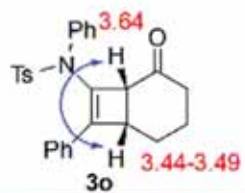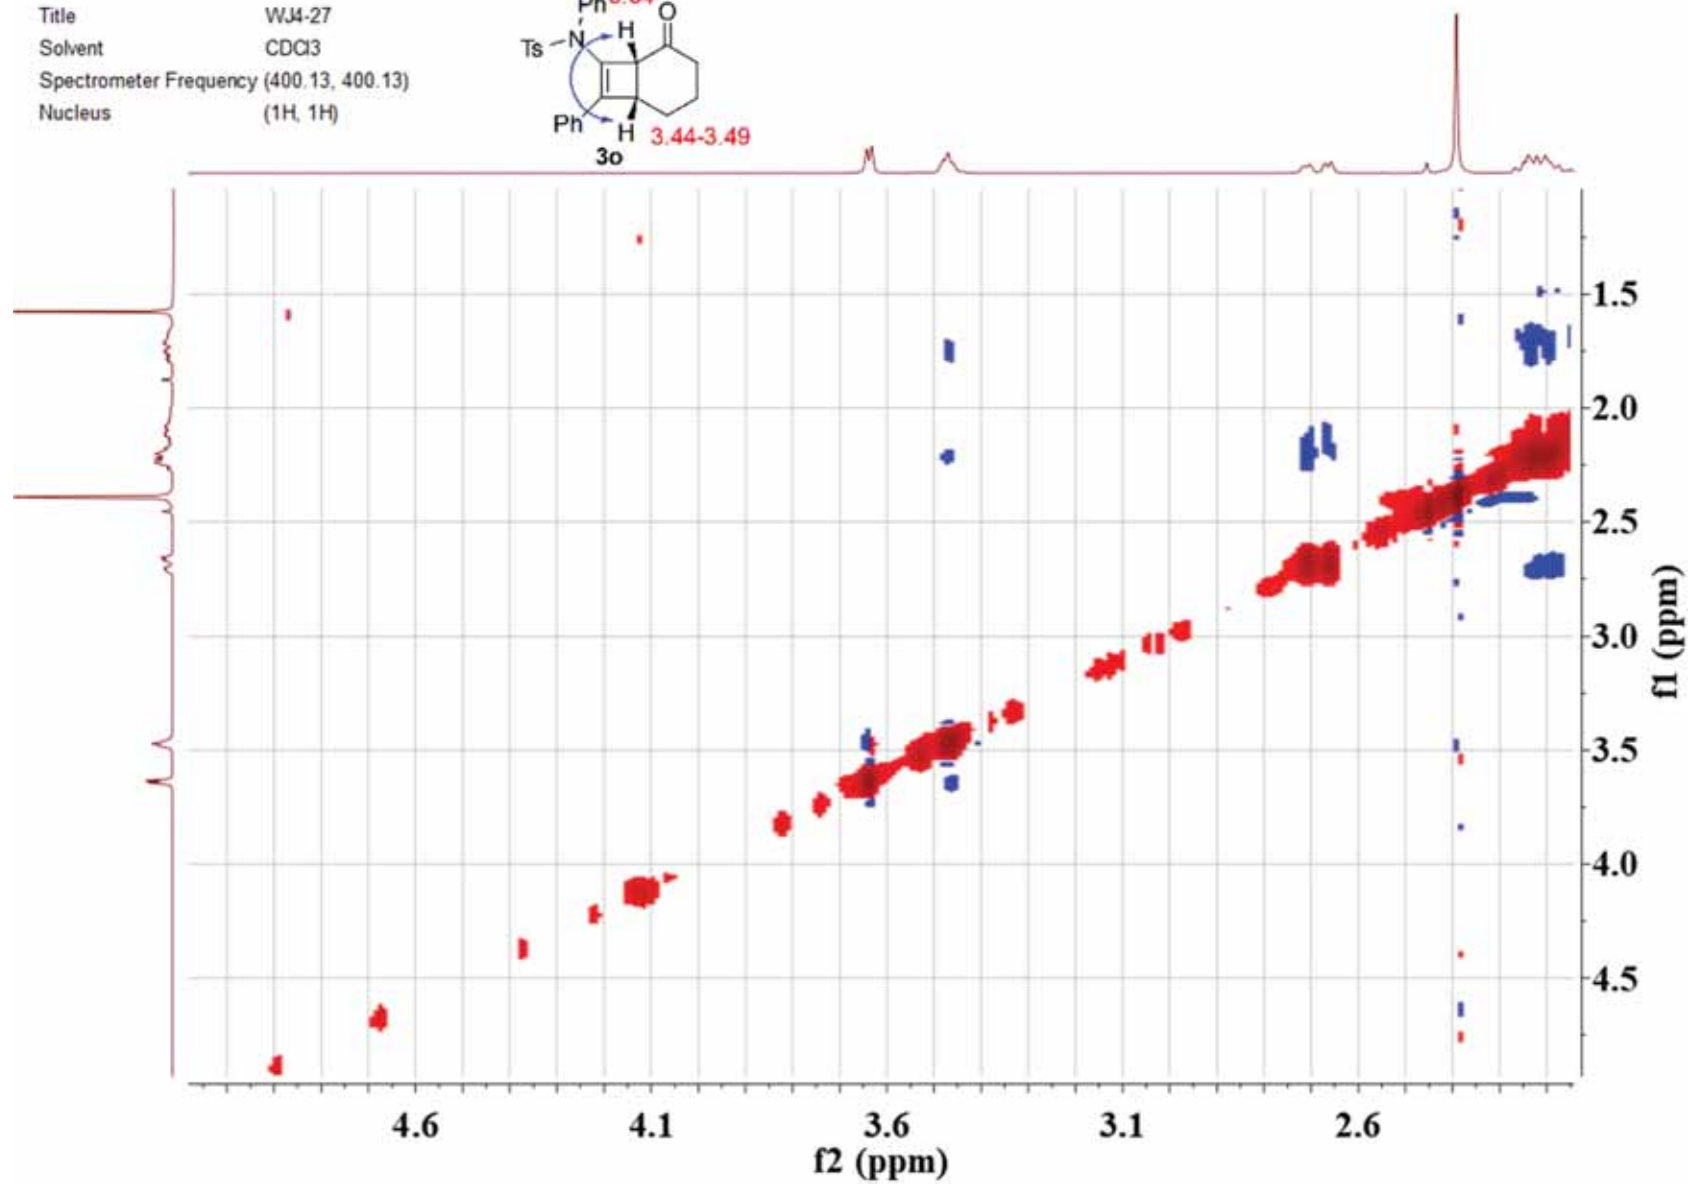

S106

Title WJ4-46  
Solvent CDCl3  
Spectrometer Frequency (400.13, 400.13)  
Nucleus (1H, 1H)

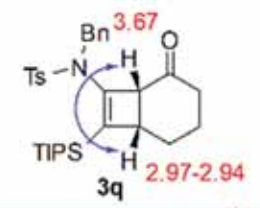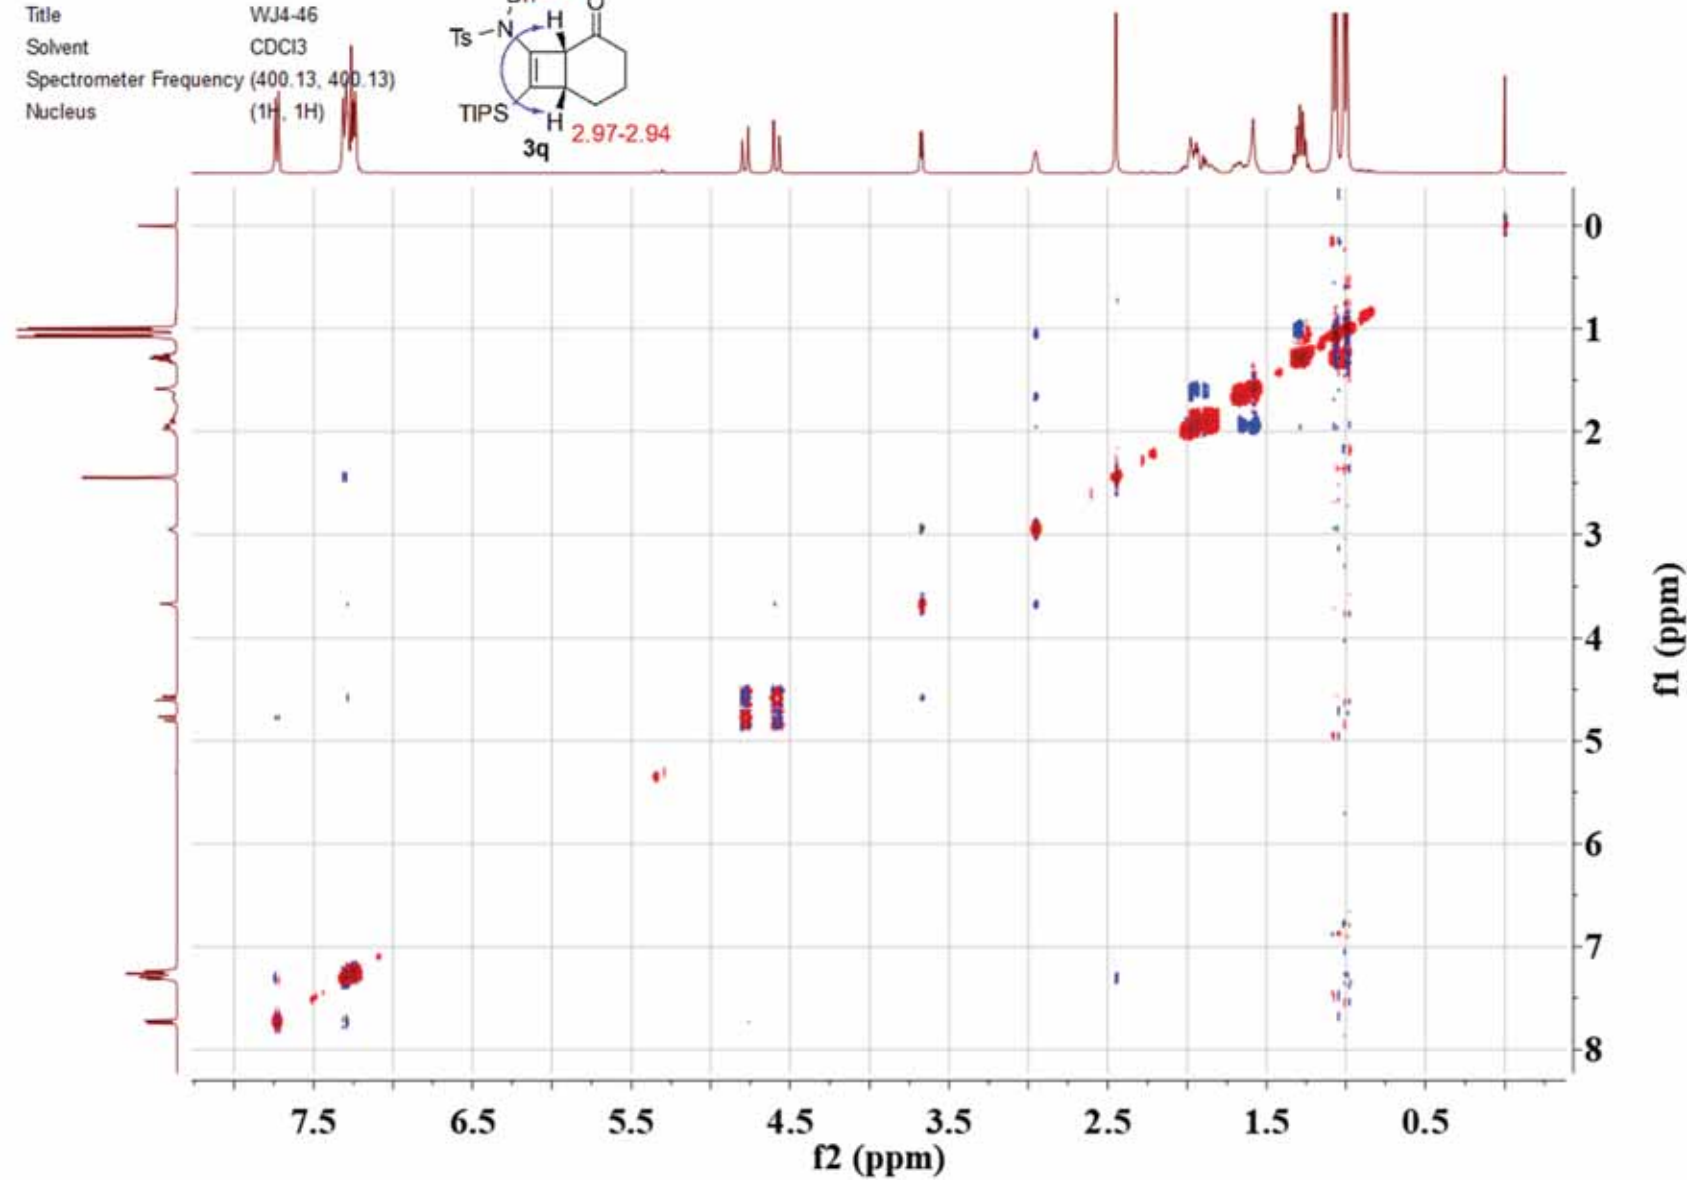

Title WJ4-46  
Solvent CDCl3  
Spectrometer Frequency (400.13, 400.13)  
Nucleus (1H, 1H)

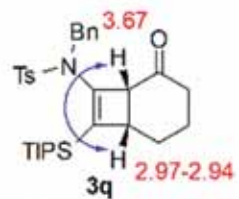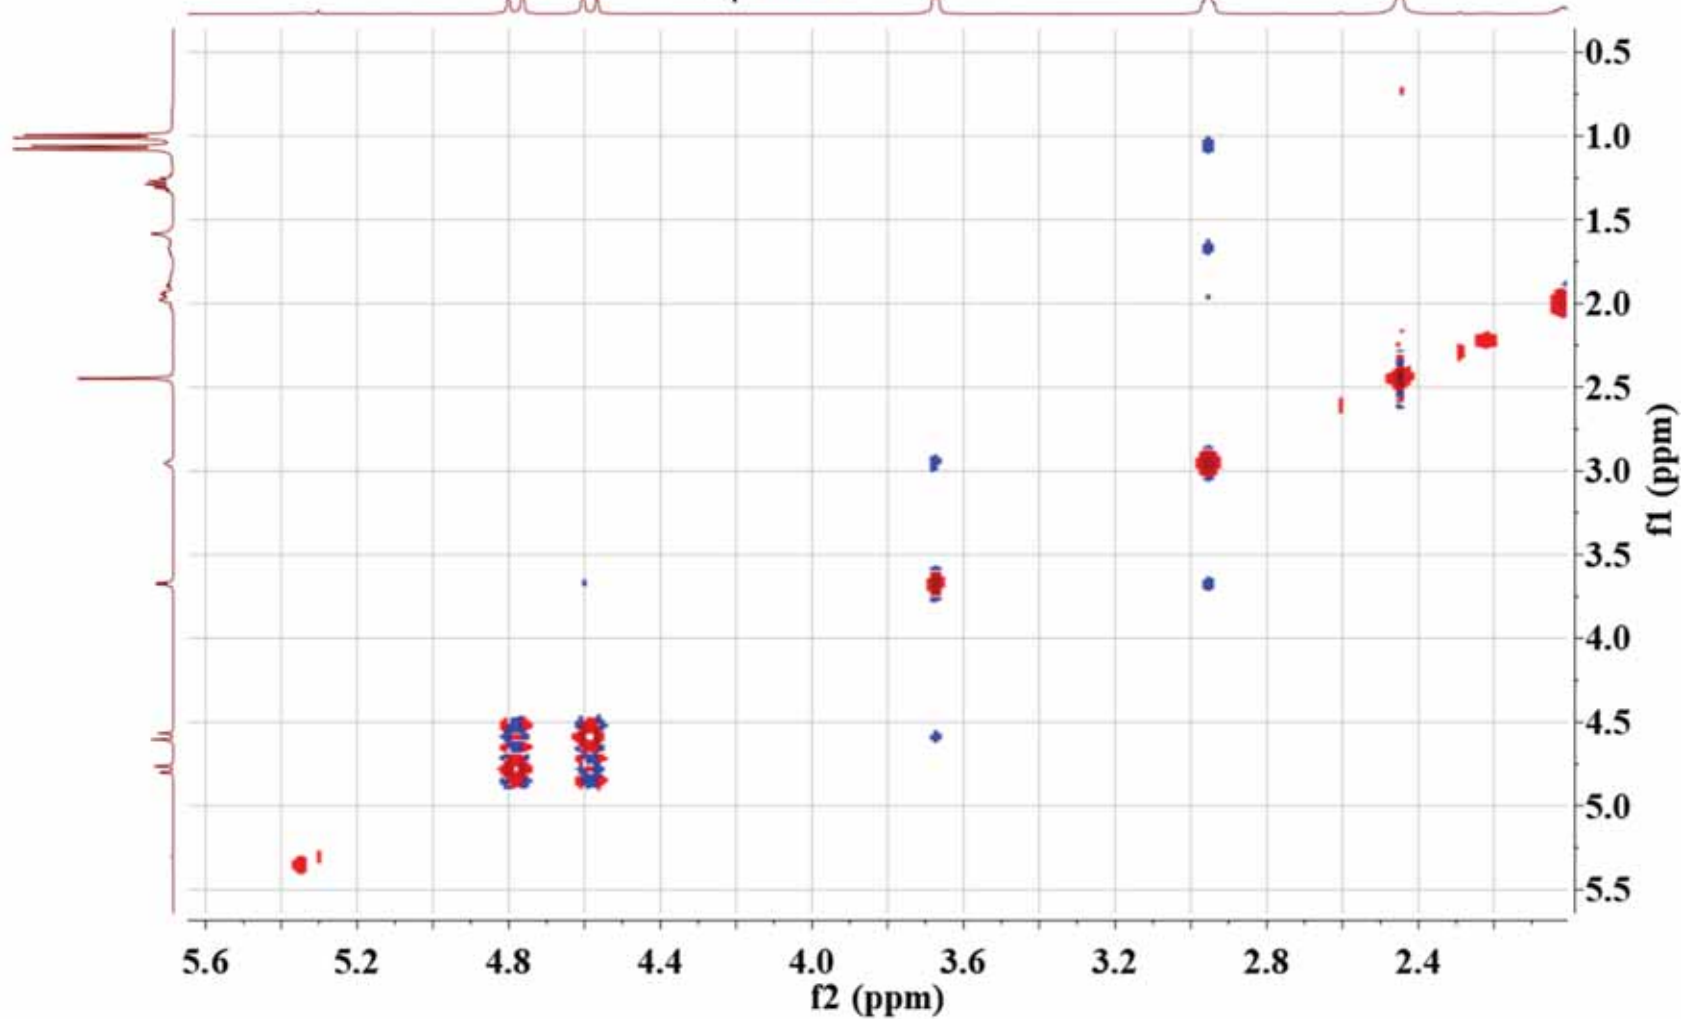

Title WJ4-44  
Solvent CDCl3  
Spectrometer Frequency (400.13, 400.13)  
Nucleus (1H, 1H)

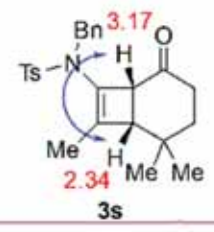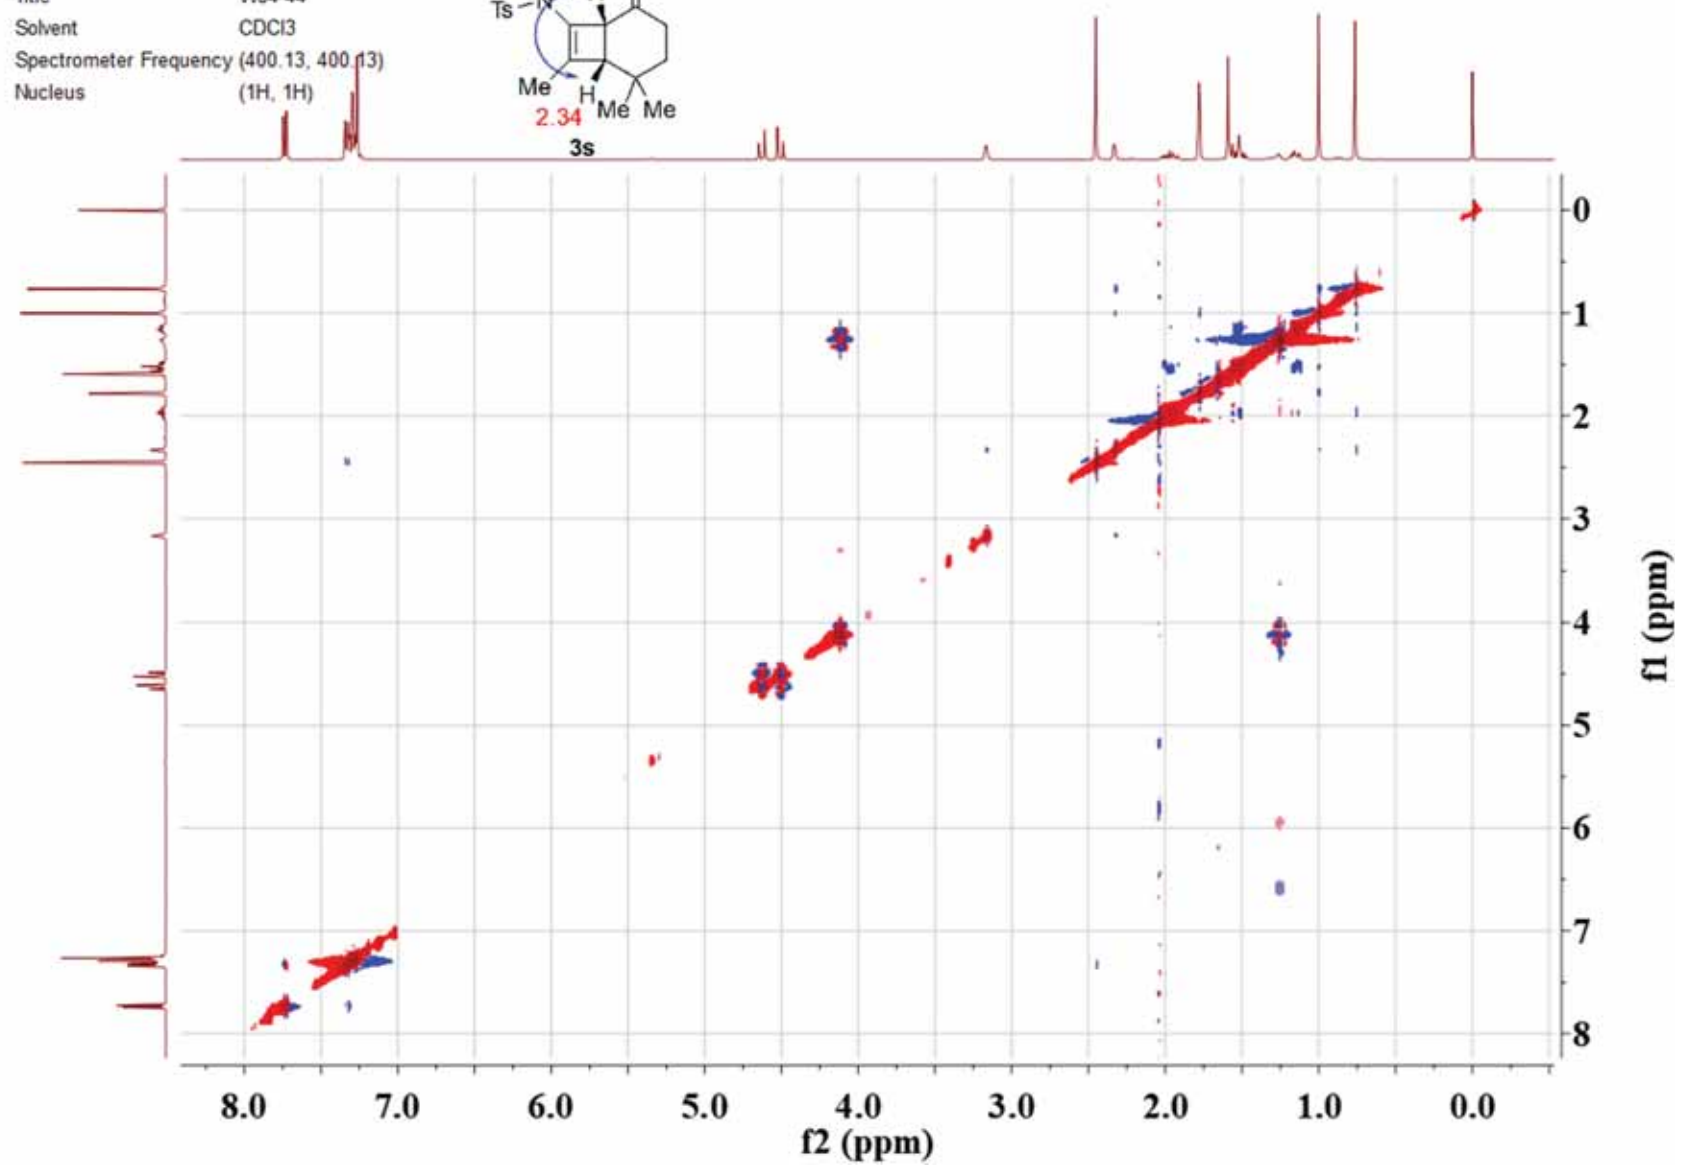

Title WJ4-44  
Solvent CDCl3  
Spectrometer Frequency (400.13, 400.13)  
Nucleus (1H, 1H)

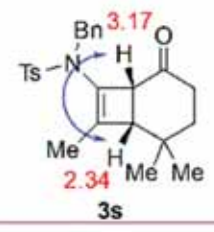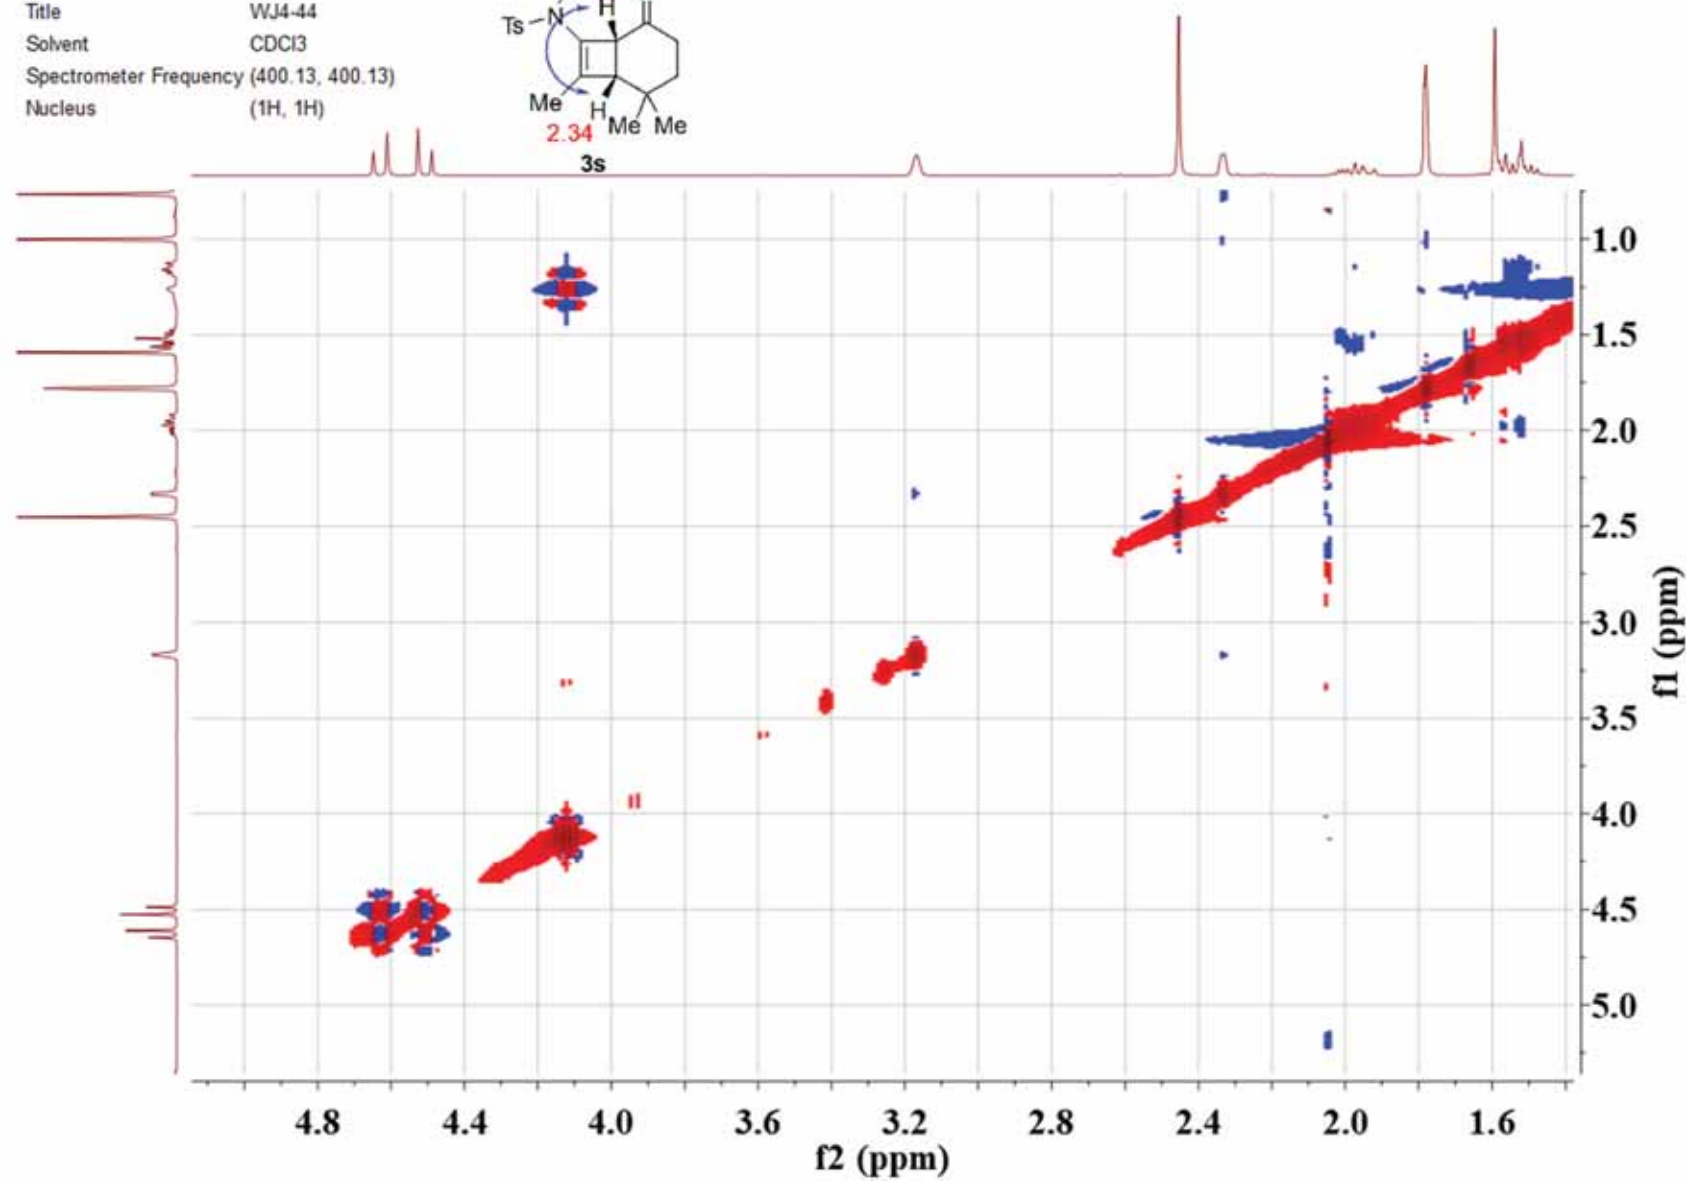

Title WJ3-80  
Solvent CDCl3  
Spectrometer Frequency (400.13, 400.13)  
Nucleus (1H, 1H)

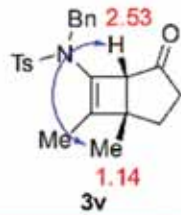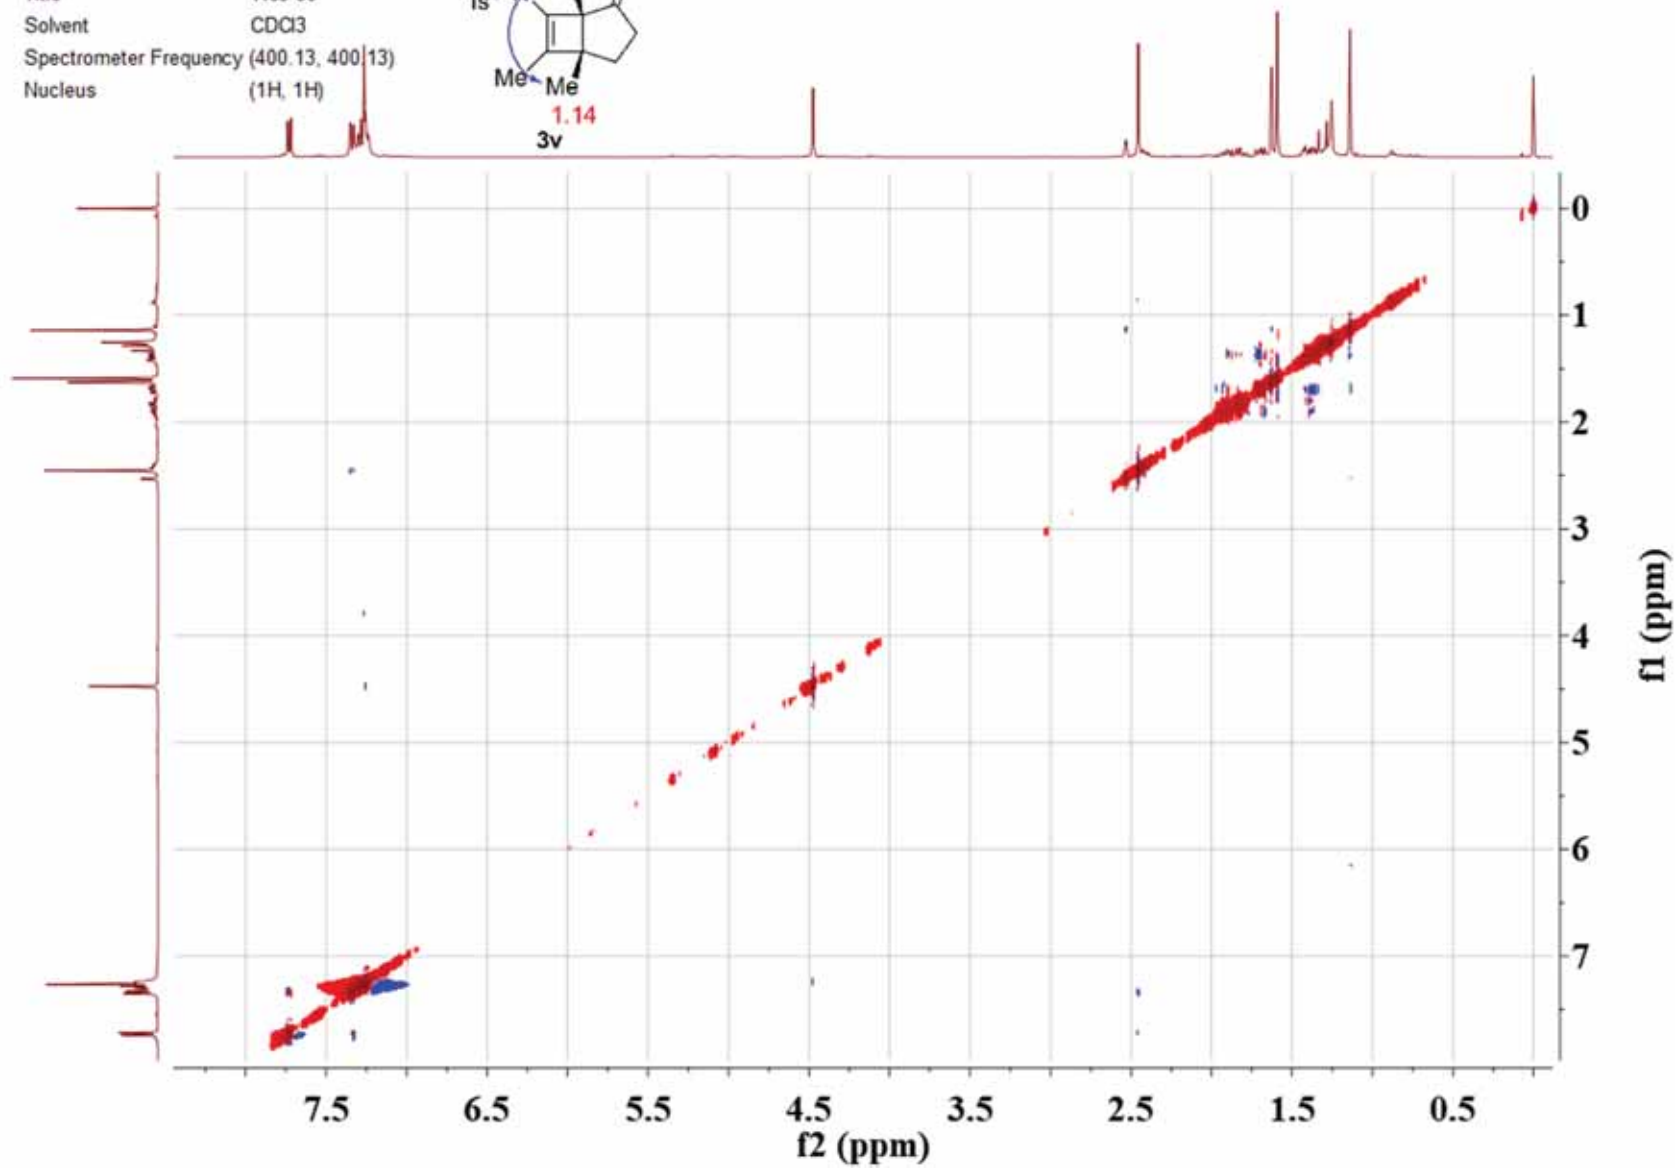

S111

Title WJ3-80  
Solvent CDCl3  
Spectrometer Frequency (400.13, 400.13)  
Nucleus (1H, 1H)

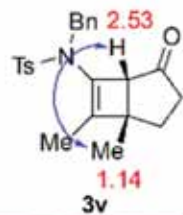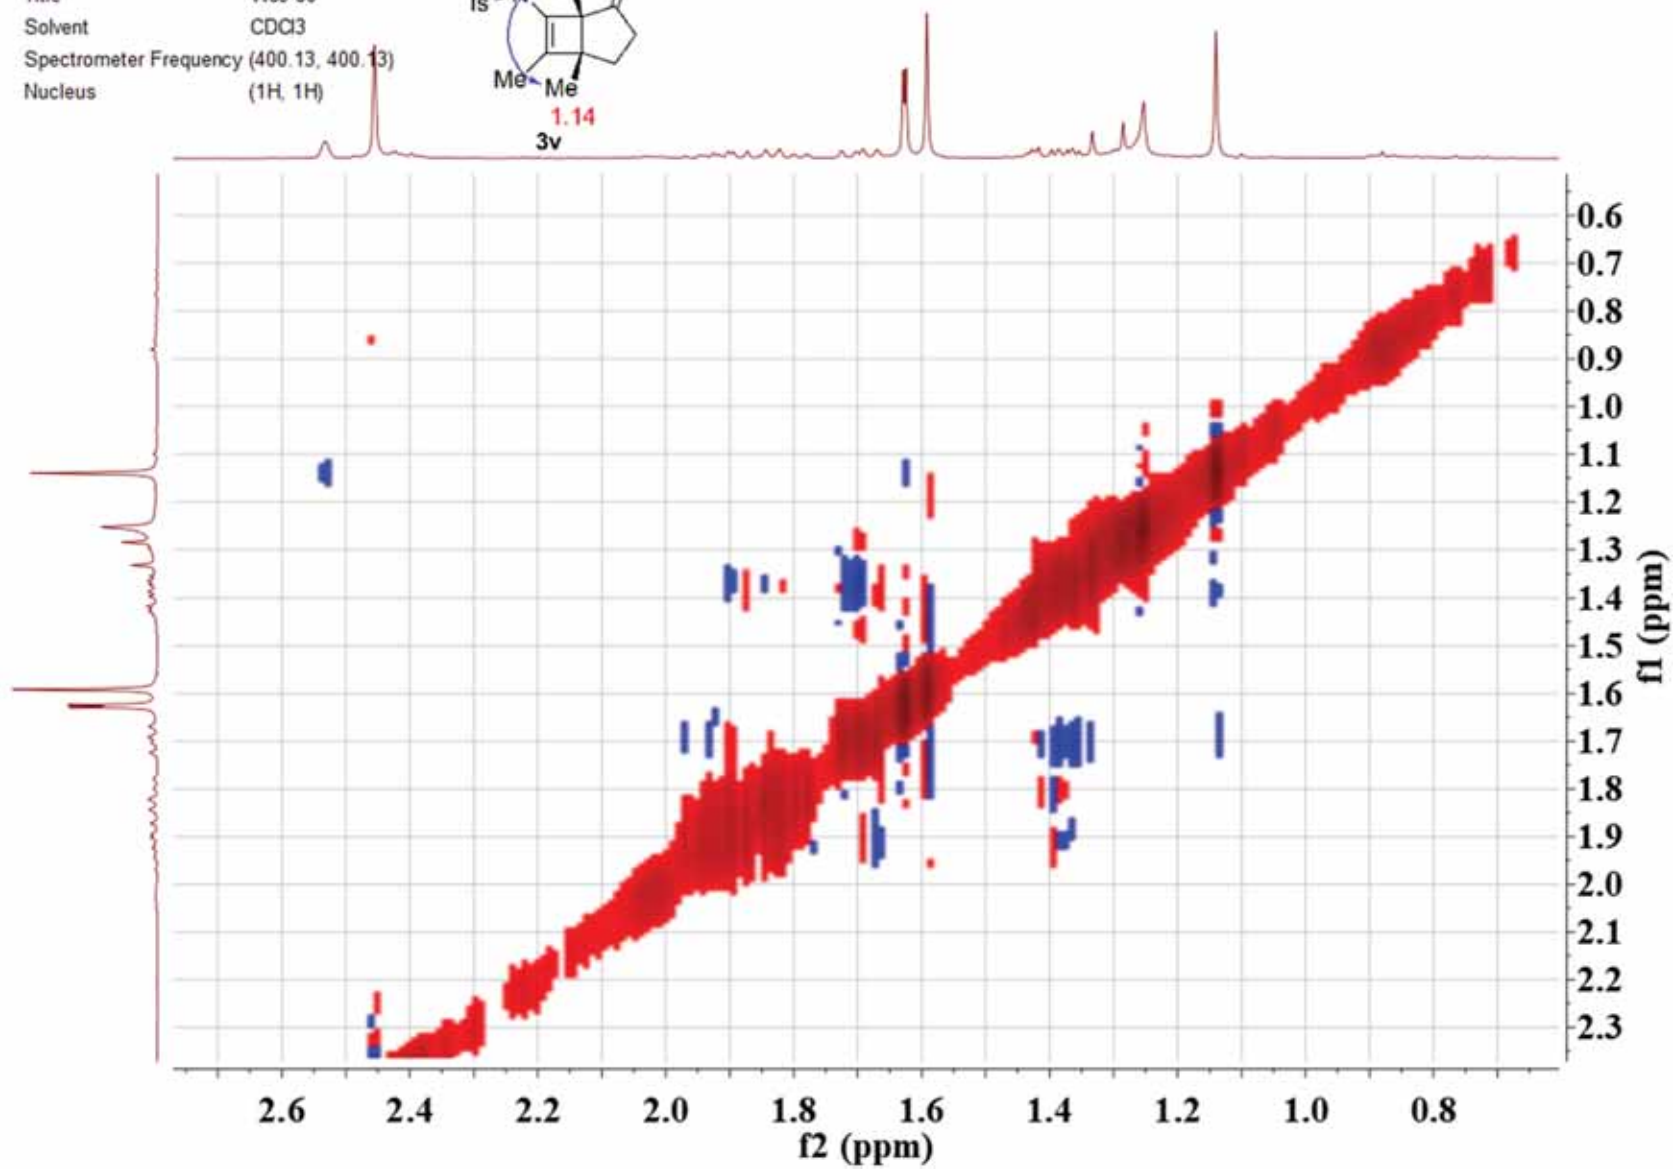

S112



Title WJ4-25-2  
Solvent CDCl3  
Spectrometer Frequency (400.13, 400.13)  
Nucleus (1H, 1H)

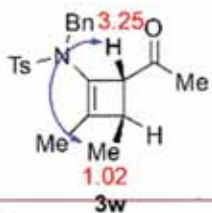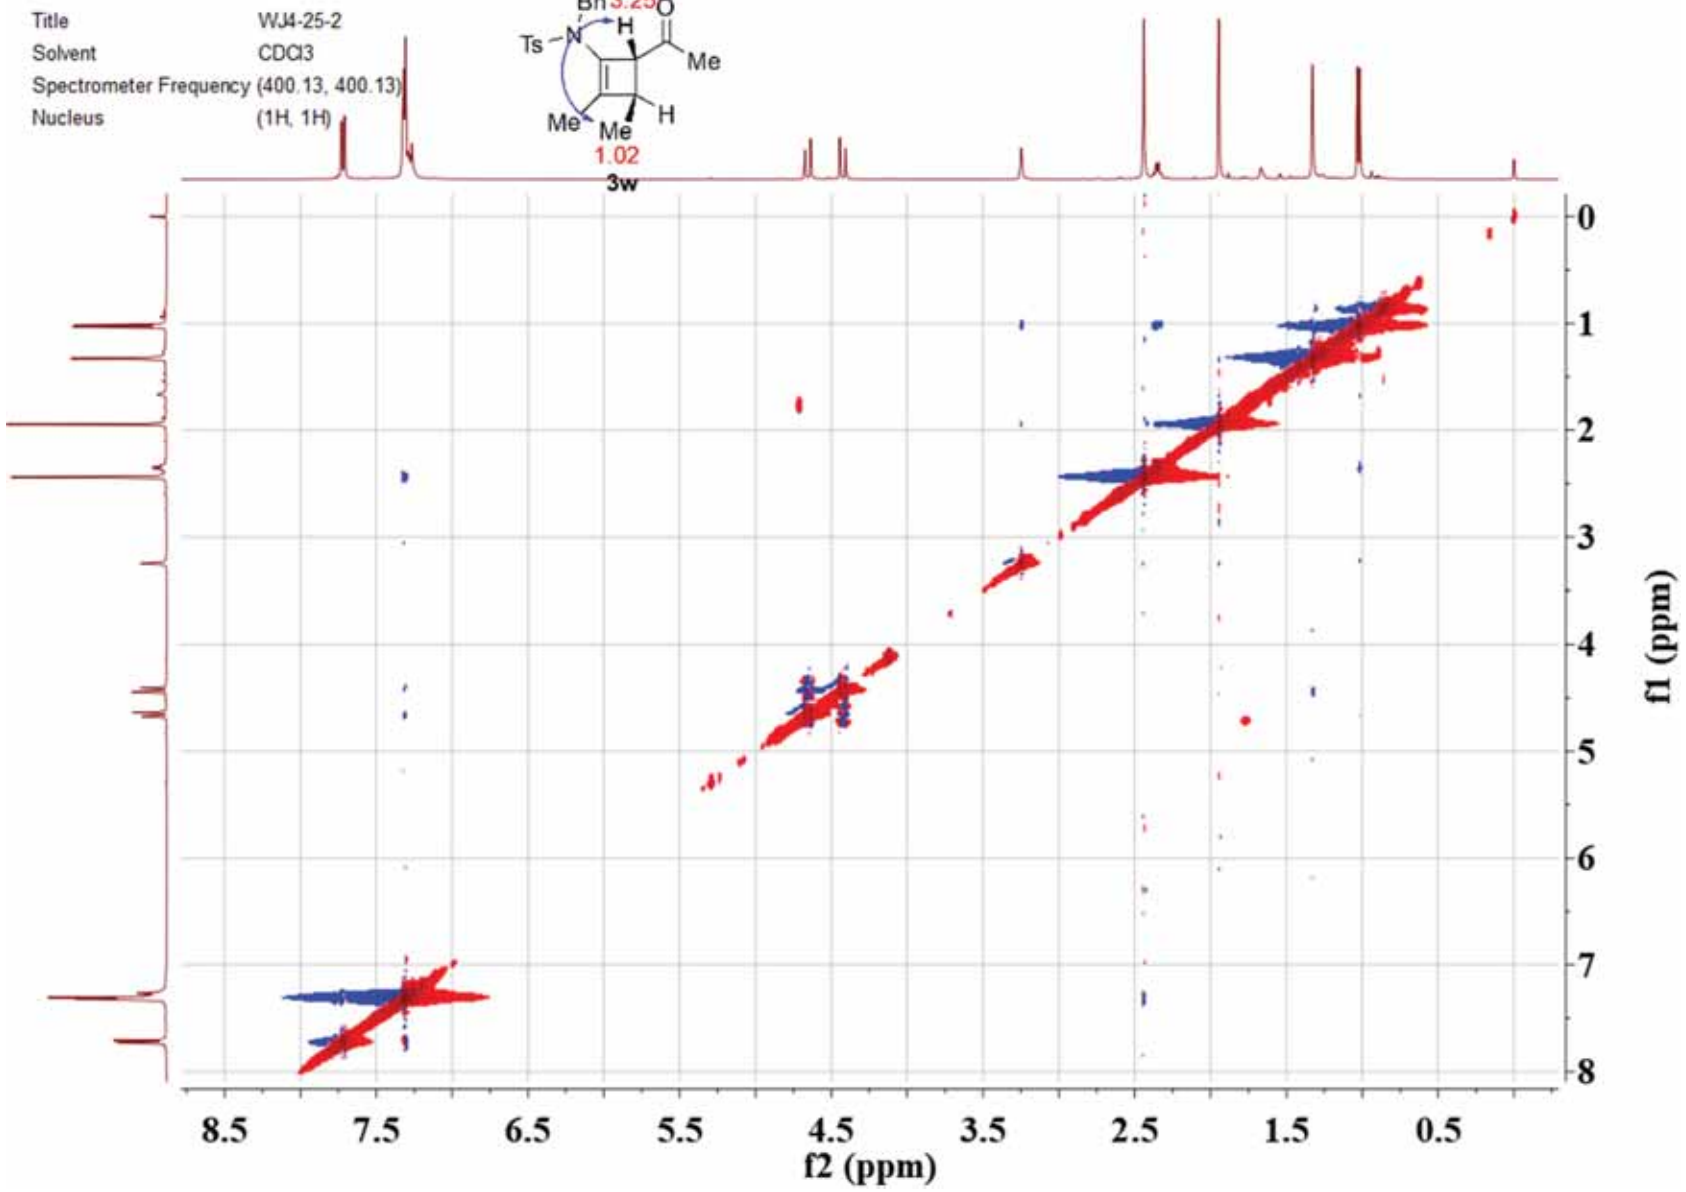

Title WJ4-25-2  
Solvent CDCl3  
Spectrometer Frequency (400.13, 400.13)  
Nucleus (1H, 1H)

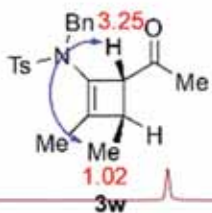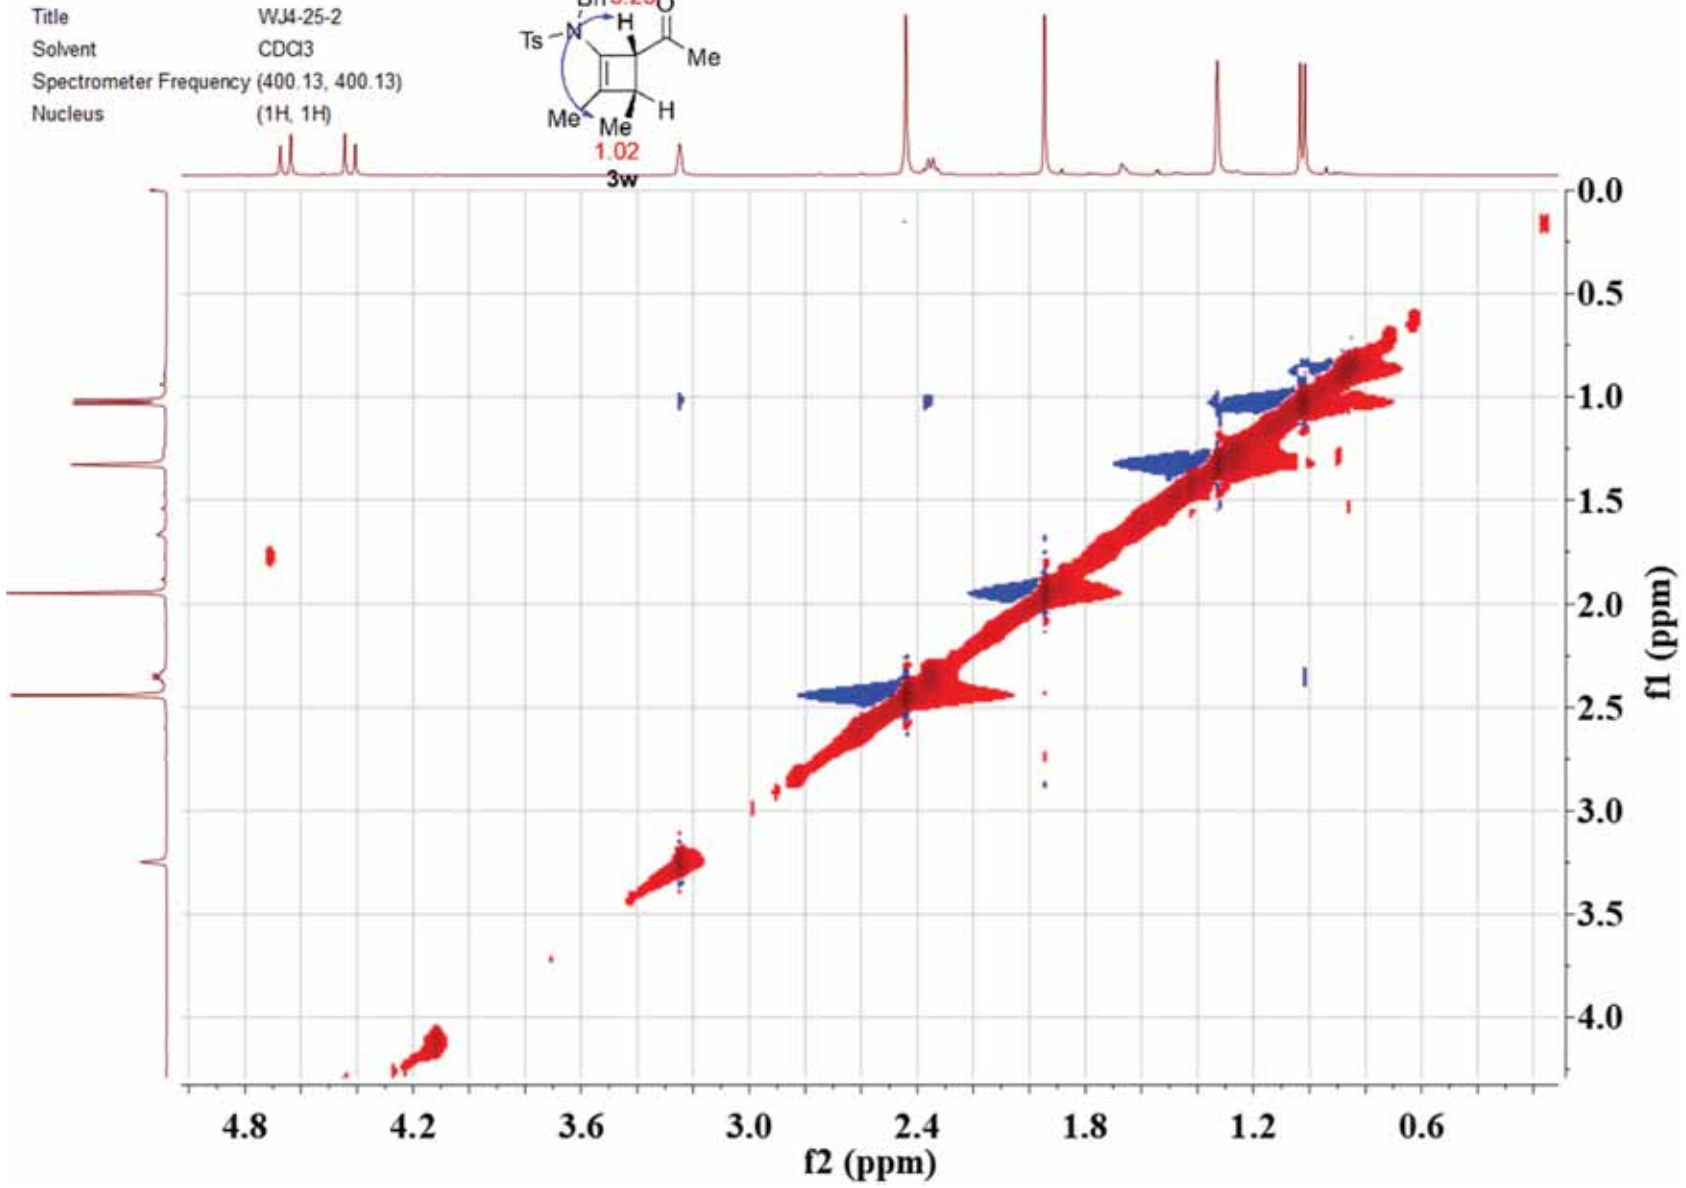

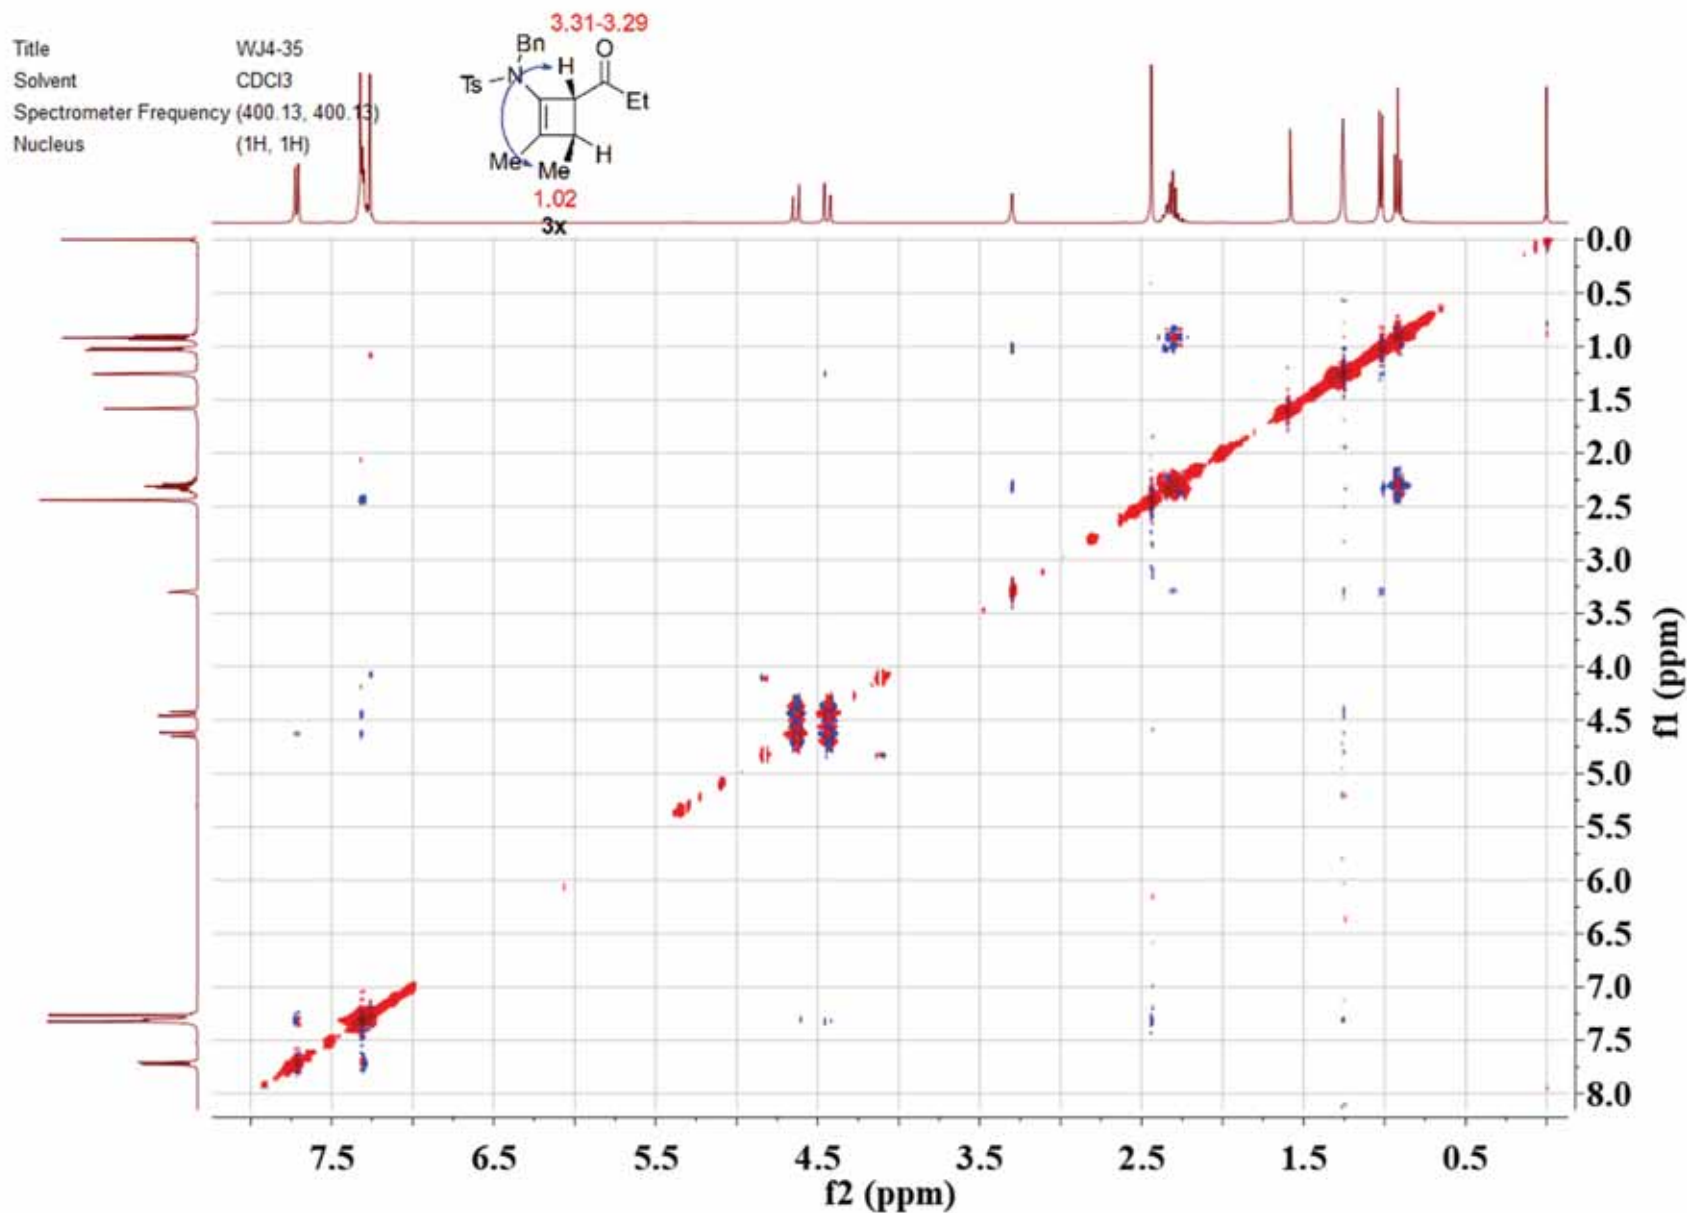

S115

Title WJ4-35  
Solvent CDCl3  
Spectrometer Frequency (400.13, 400.13)  
Nucleus (1H, 1H)

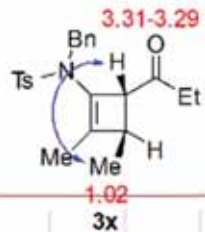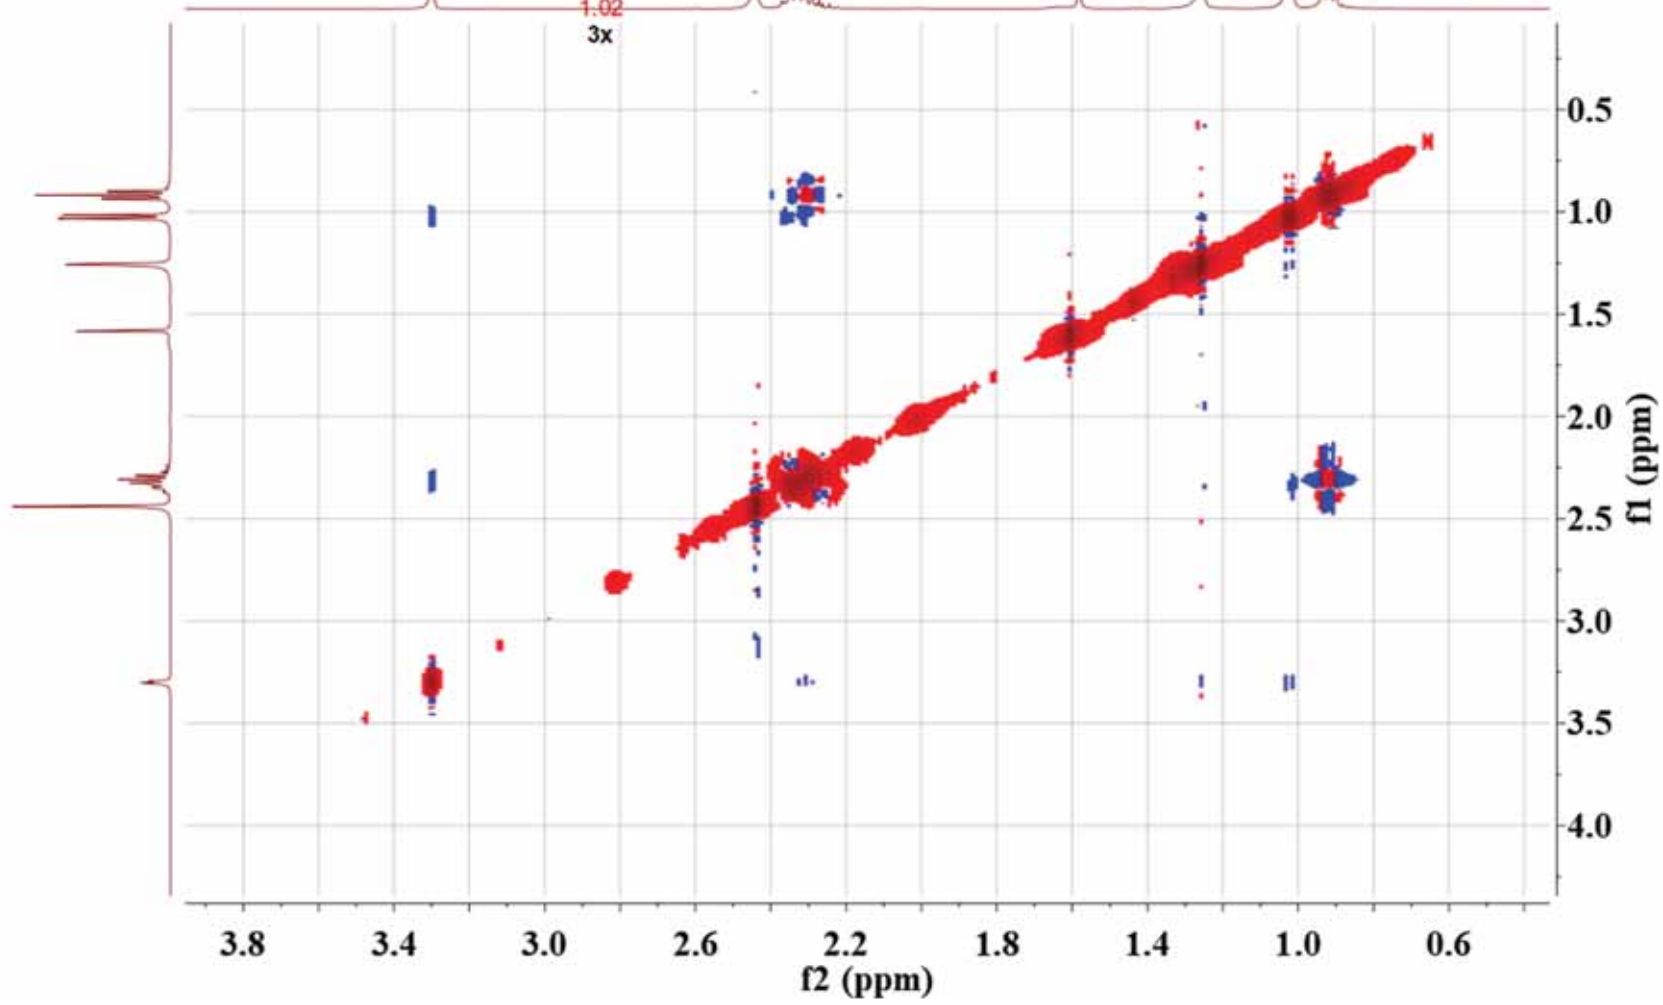

# NOESY, COSY, HSQC, and HMBC Spectra of Cyclobutenamides 3y and 3z.

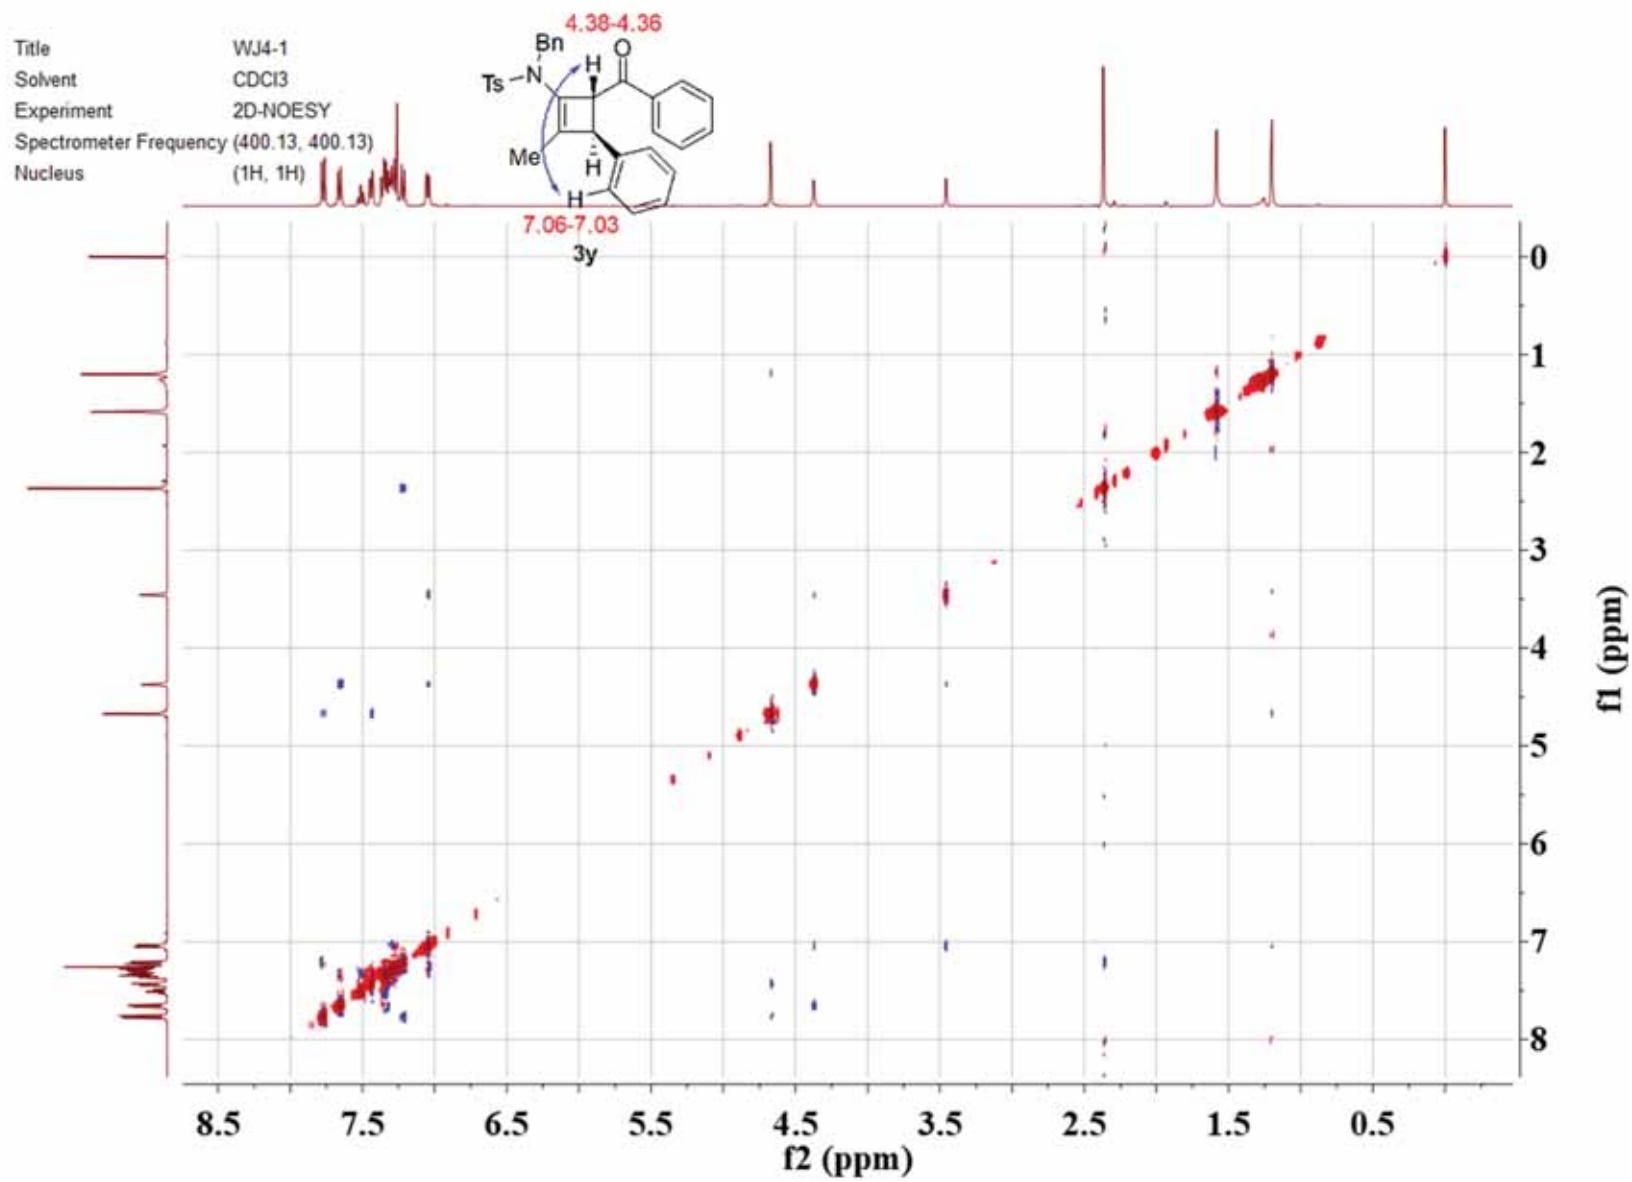

Title WJ4-1  
Solvent CDCl3  
Experiment 2D-NOESY  
Spectrometer Frequency (400.13, 400.13)  
Nucleus (1H, 1H)

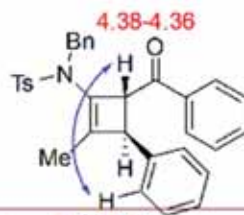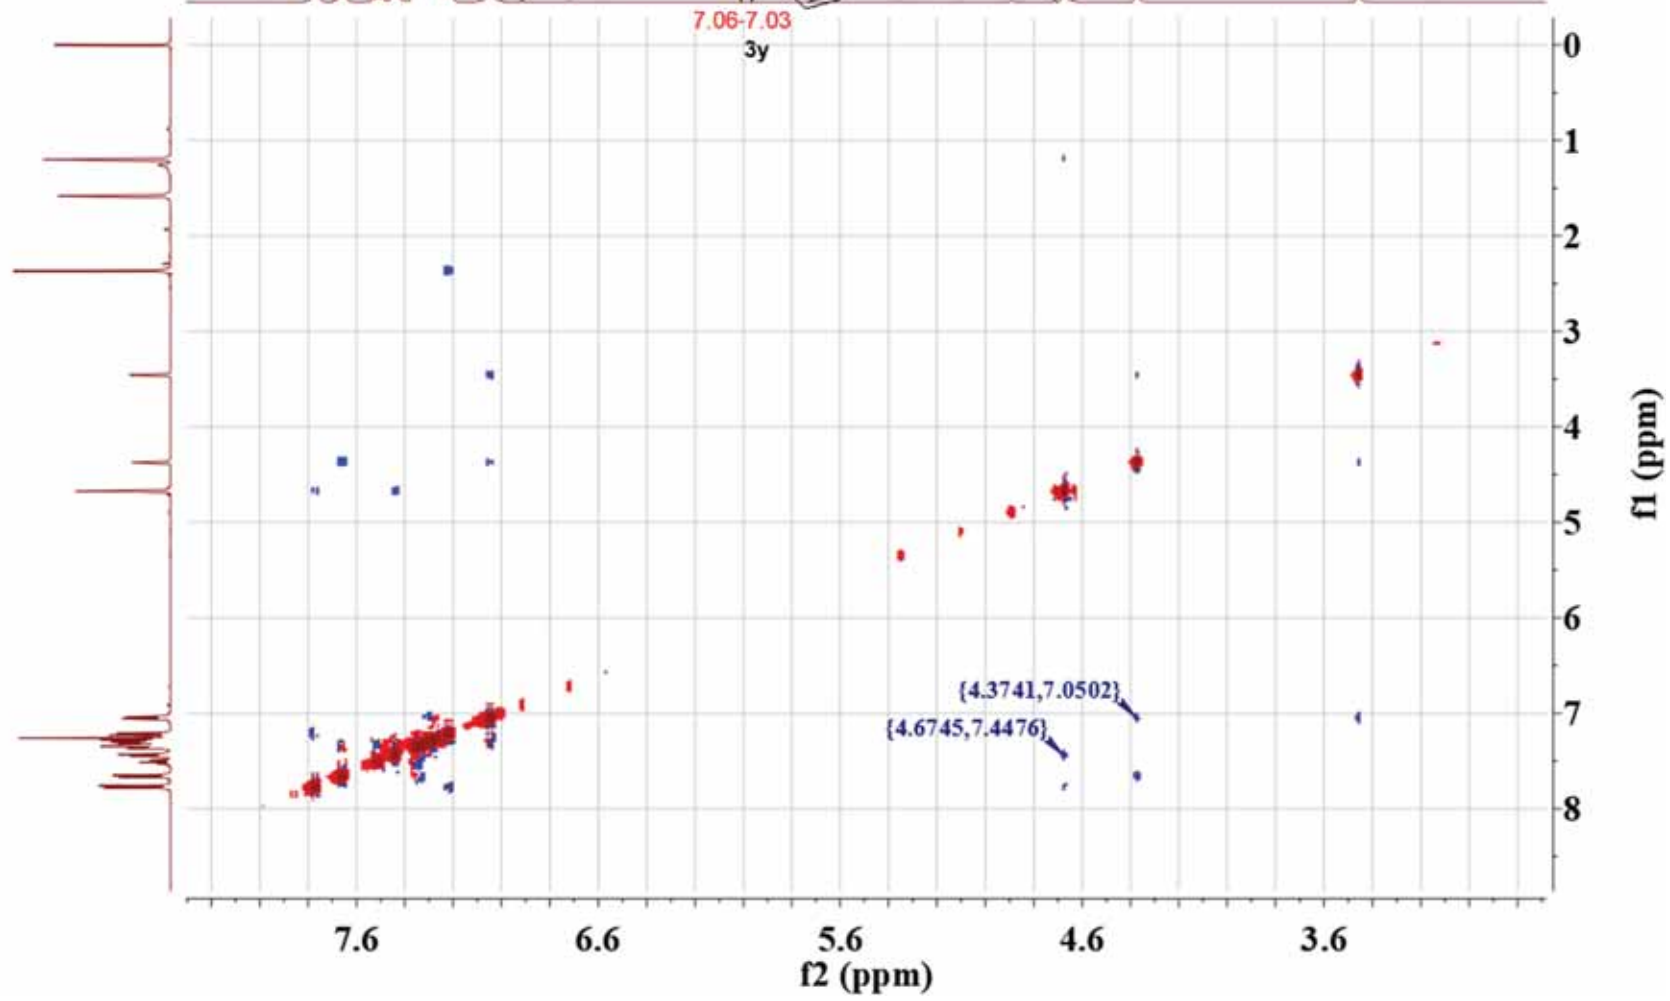

S118

Title WJ4-1  
Solvent CDCl3  
Experiment 2D-COSY  
Spectrometer Frequency (400.13, 400.13)  
Nucleus (1H, 1H)

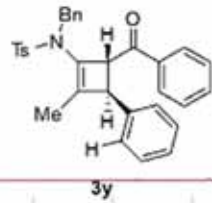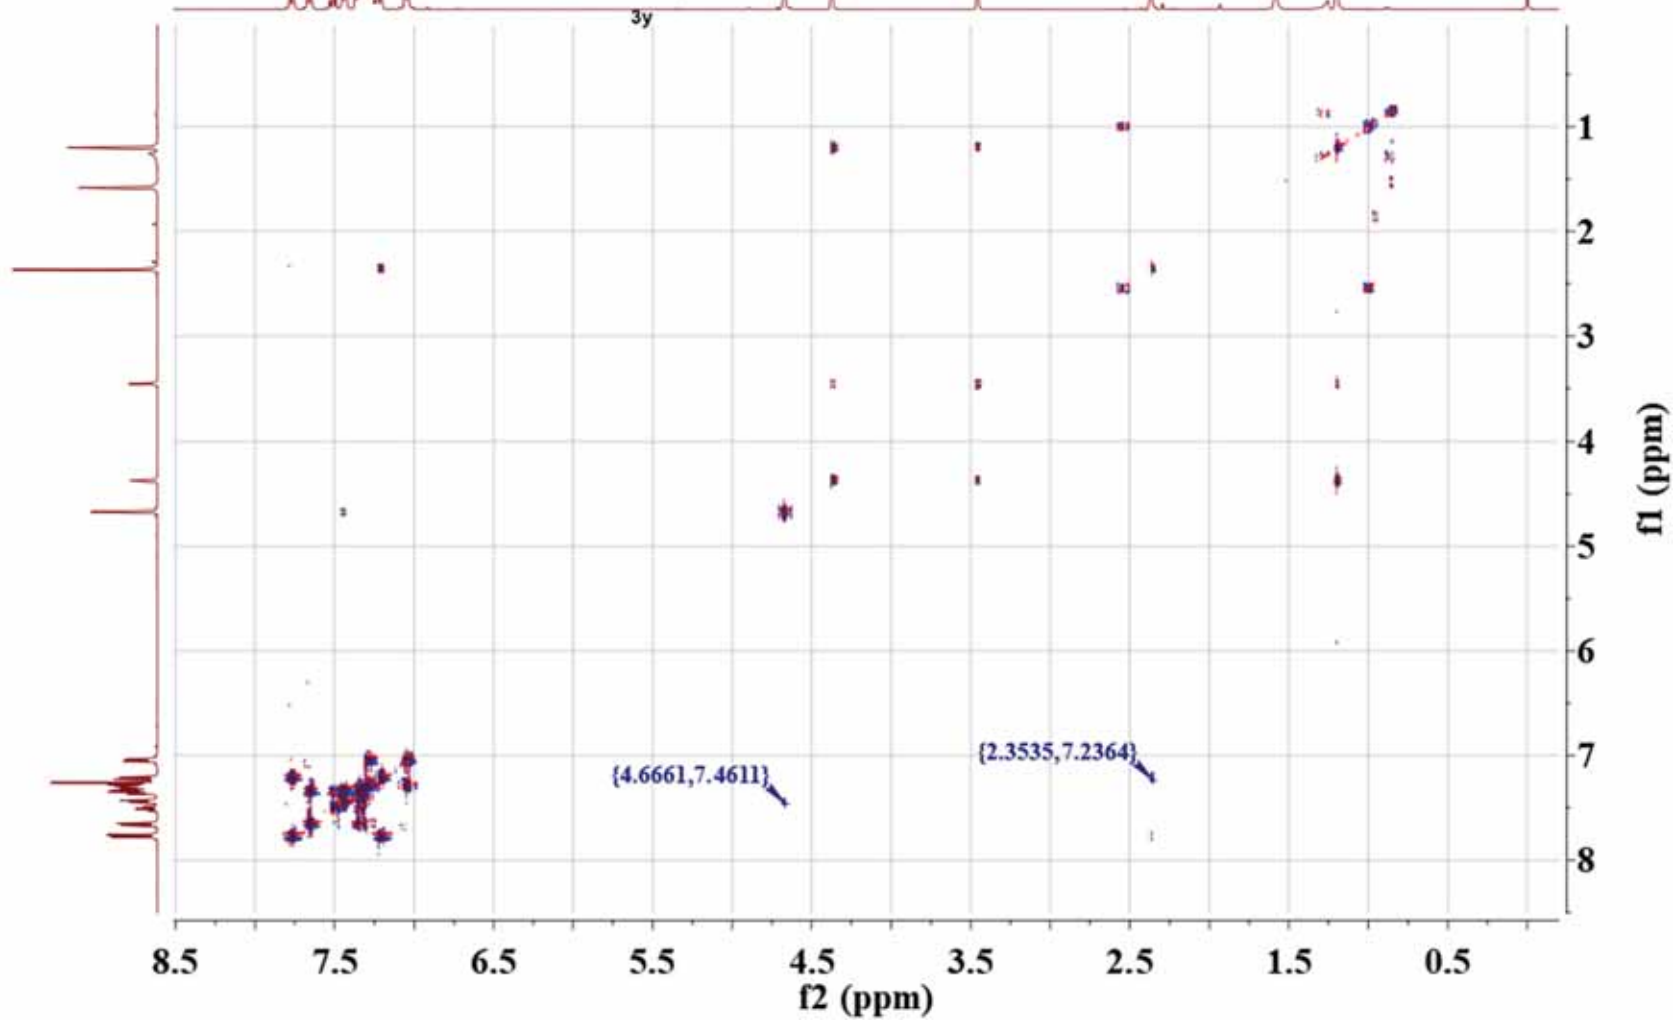

Title WJ4-1  
Solvent CDCl3  
Experiment 2D-COSY  
Spectrometer Frequency (400.13, 400.13)  
Nucleus (1H, 1H)

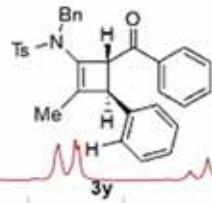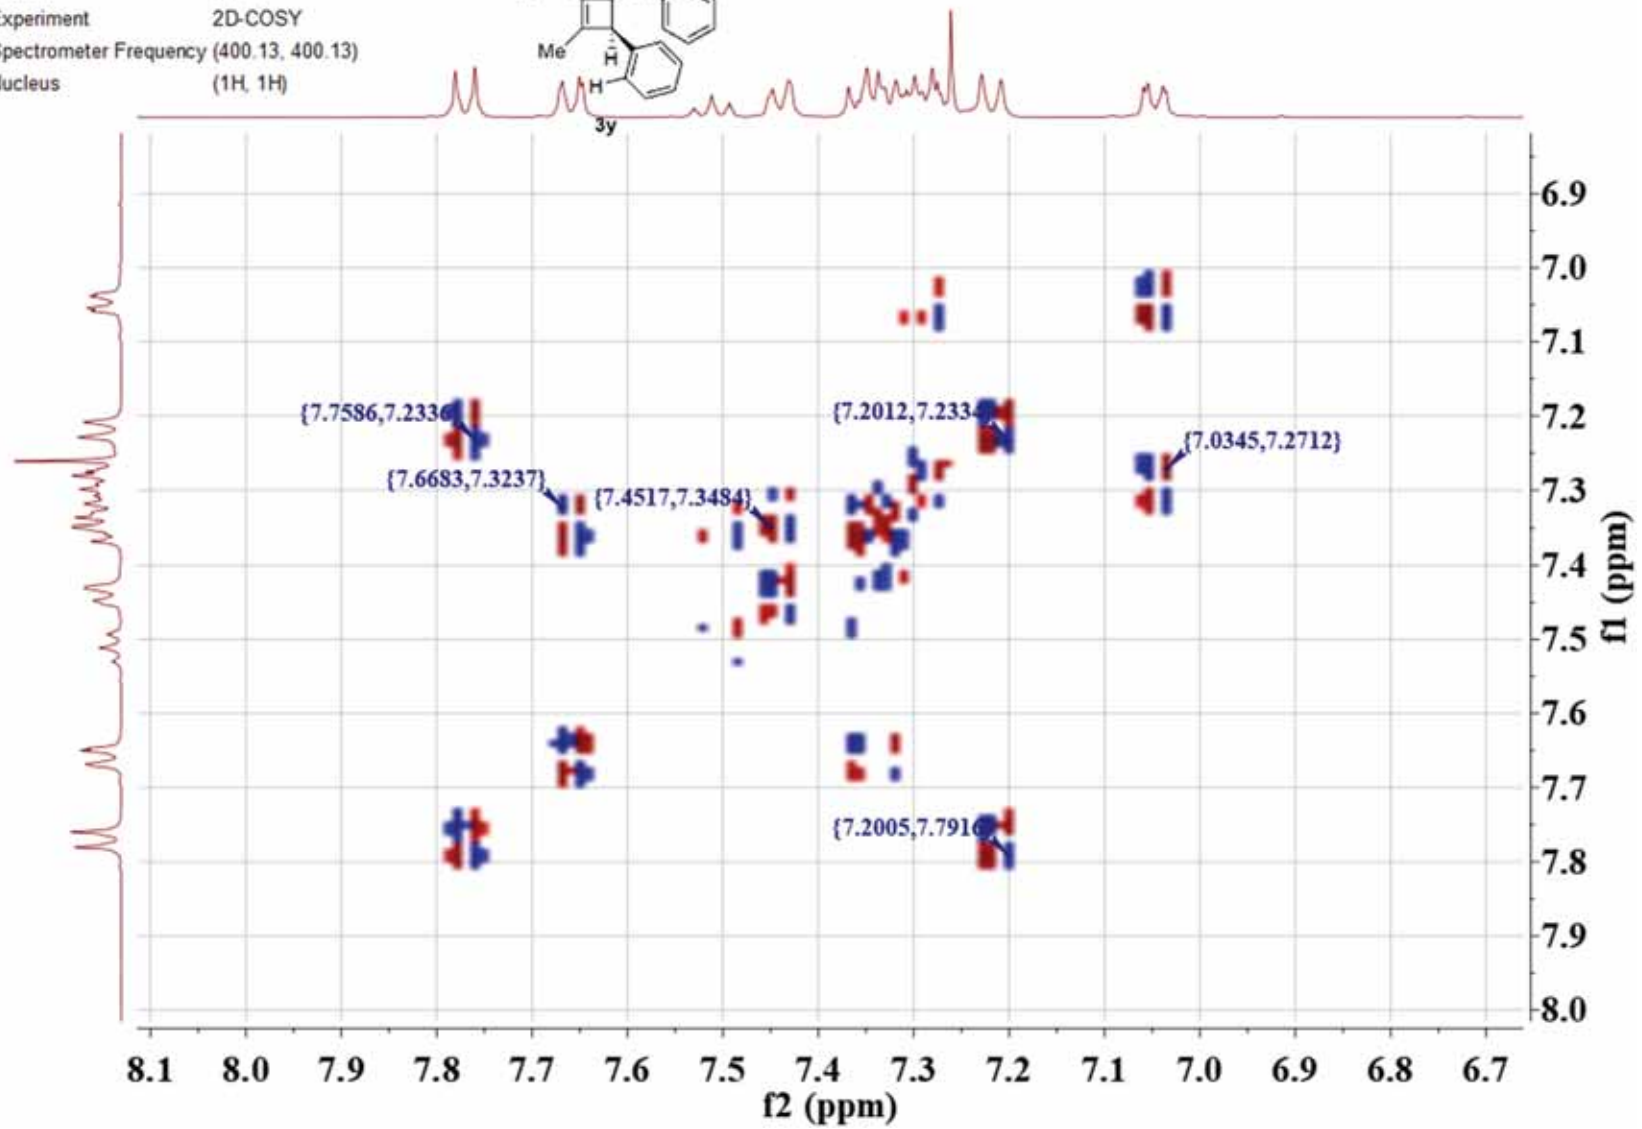



Title WJ4-1  
Solvent CDCl3  
Experiment 2D-HSQC-EDITED  
Spectrometer Frequency (400.13, 100.61)  
Nucleus (1H, 13C)

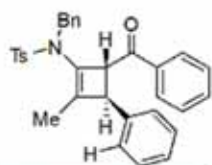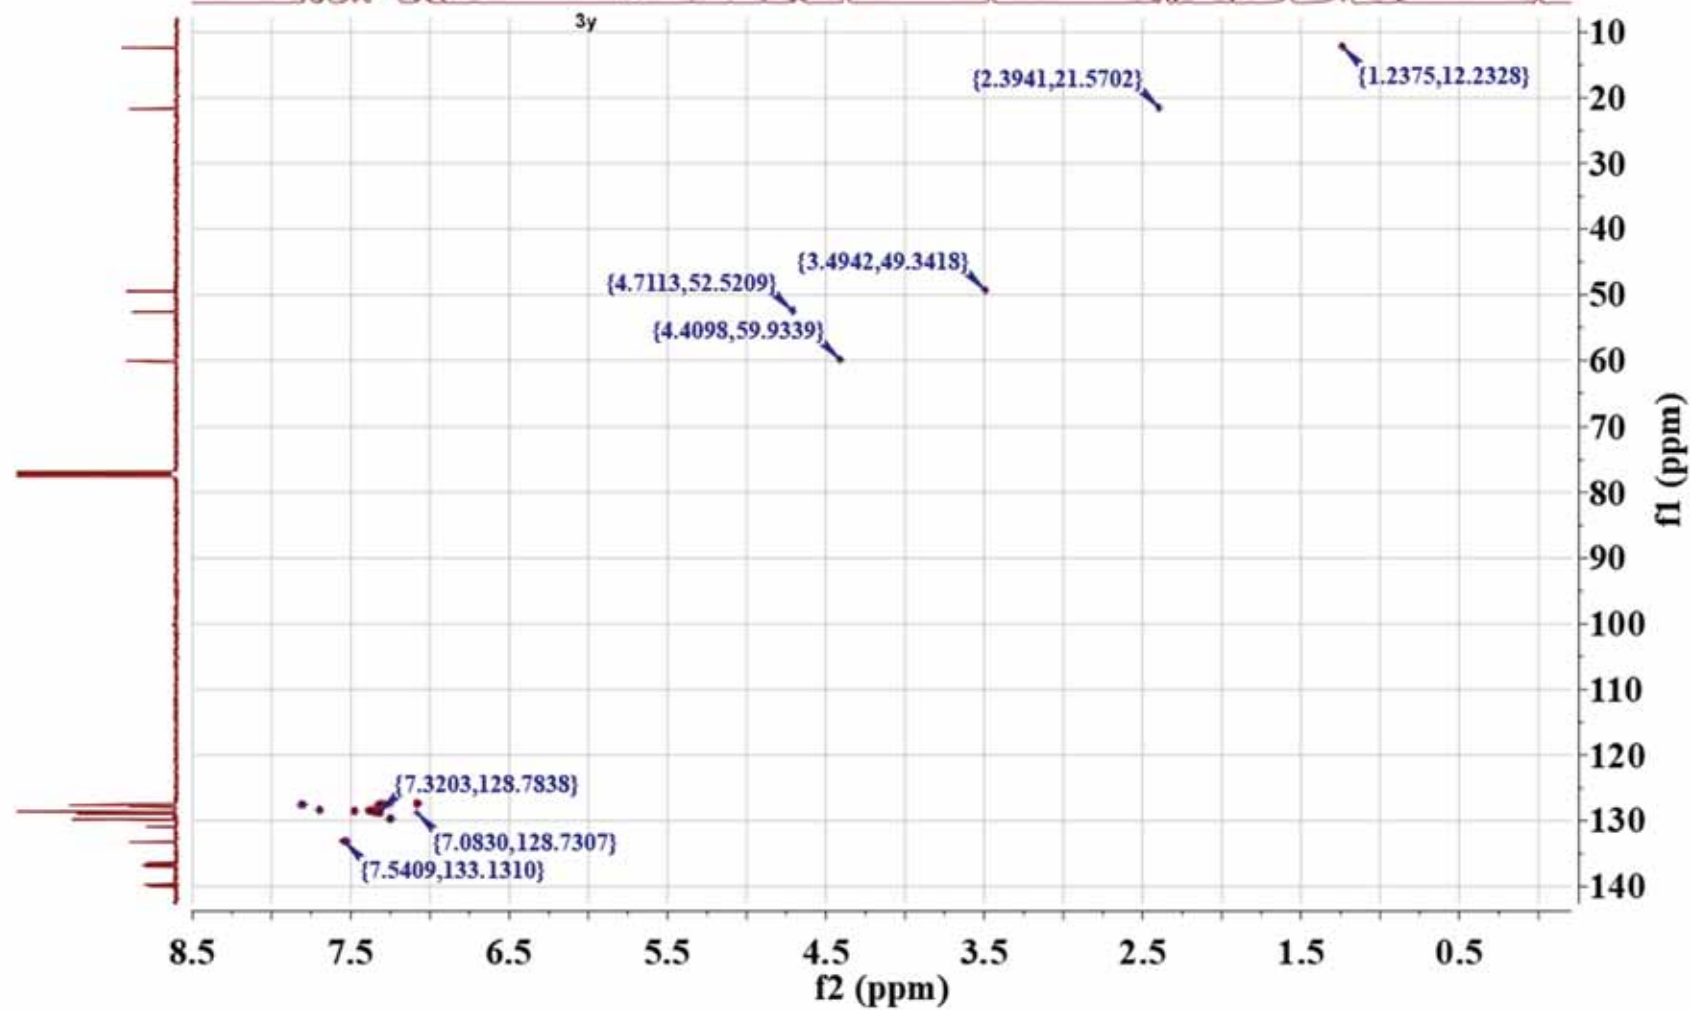

Title WJ4-1  
Solvent CDCl3  
Experiment 2D-HSQC-EDITED  
Spectrometer Frequency (400.13, 100.61)  
Nucleus (1H, 13C)

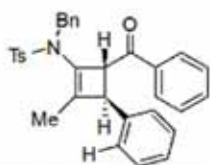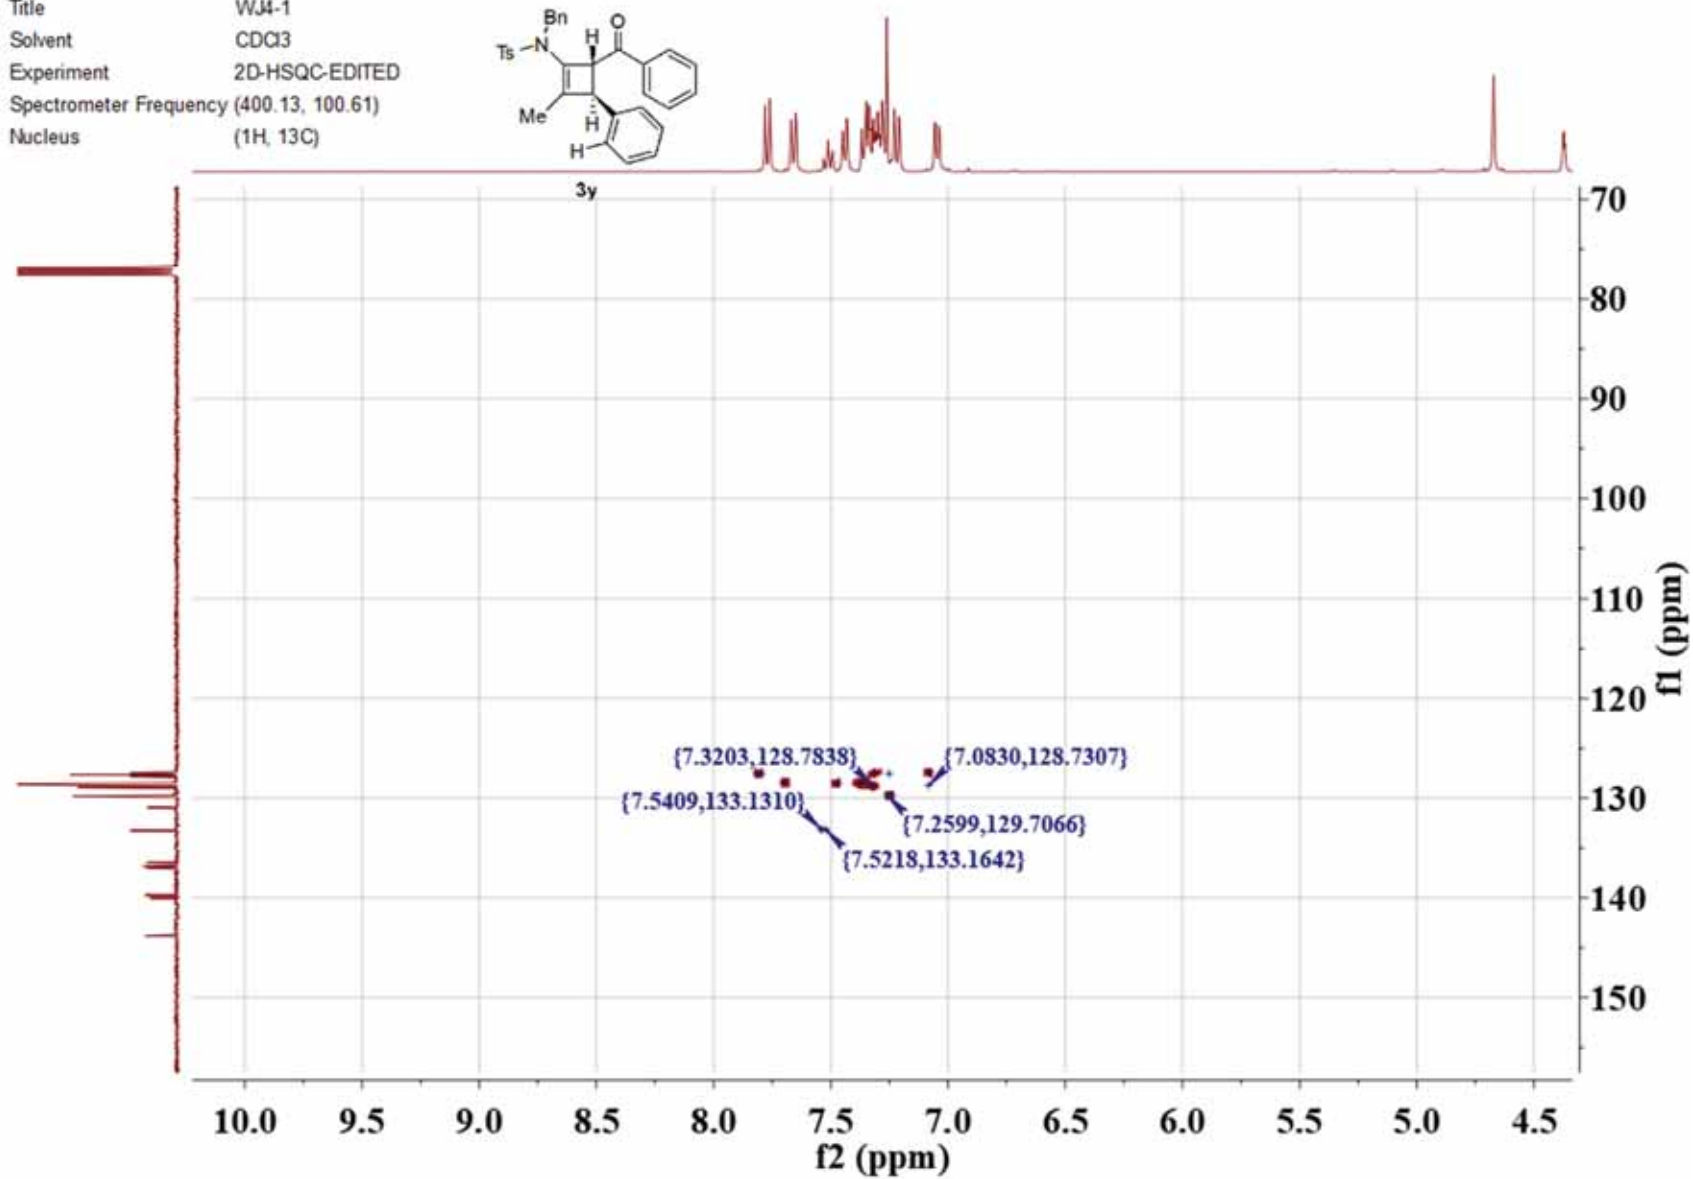

Title WJ4-1  
Solvent CDCl3  
Experiment 2D-HMBC  
Spectrometer Frequency (400.13, 100.61)  
Nucleus (1H, 13C)

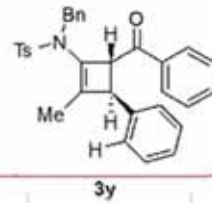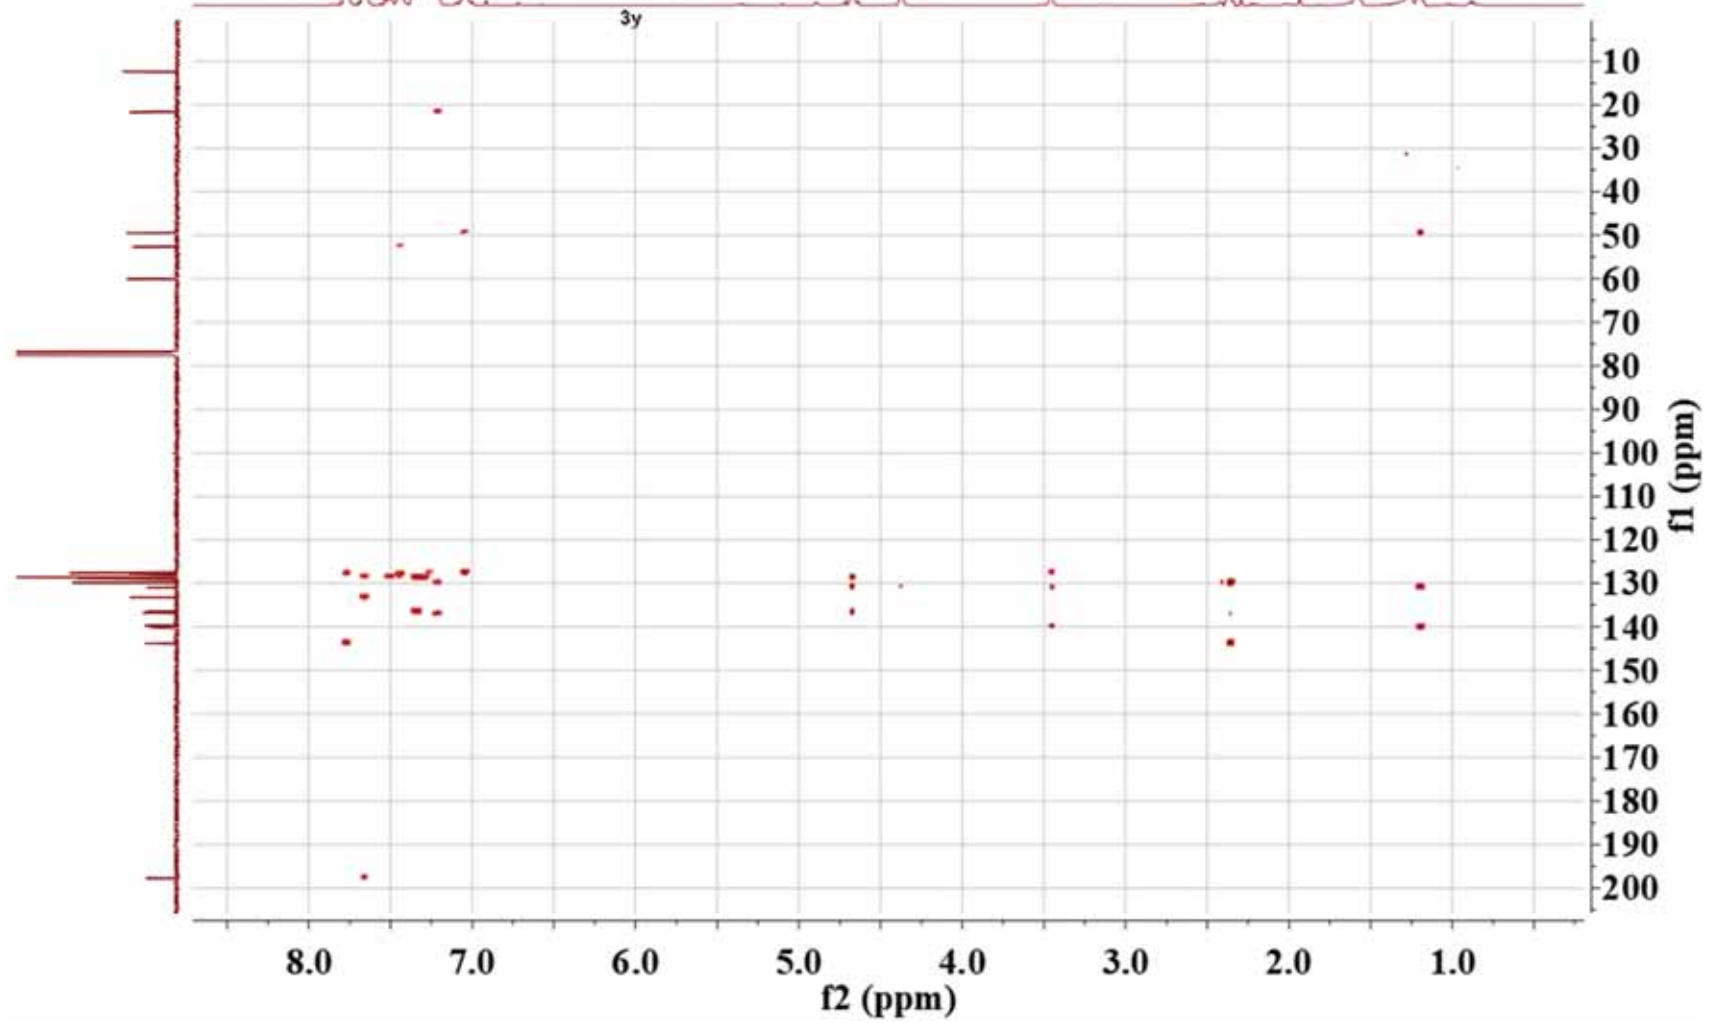

Title WJ4-1  
Solvent CDCl3  
Experiment 2D-HMBC  
Spectrometer Frequency (400 13 100.61  
Nucleus (1H, 13C)

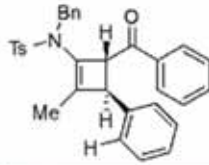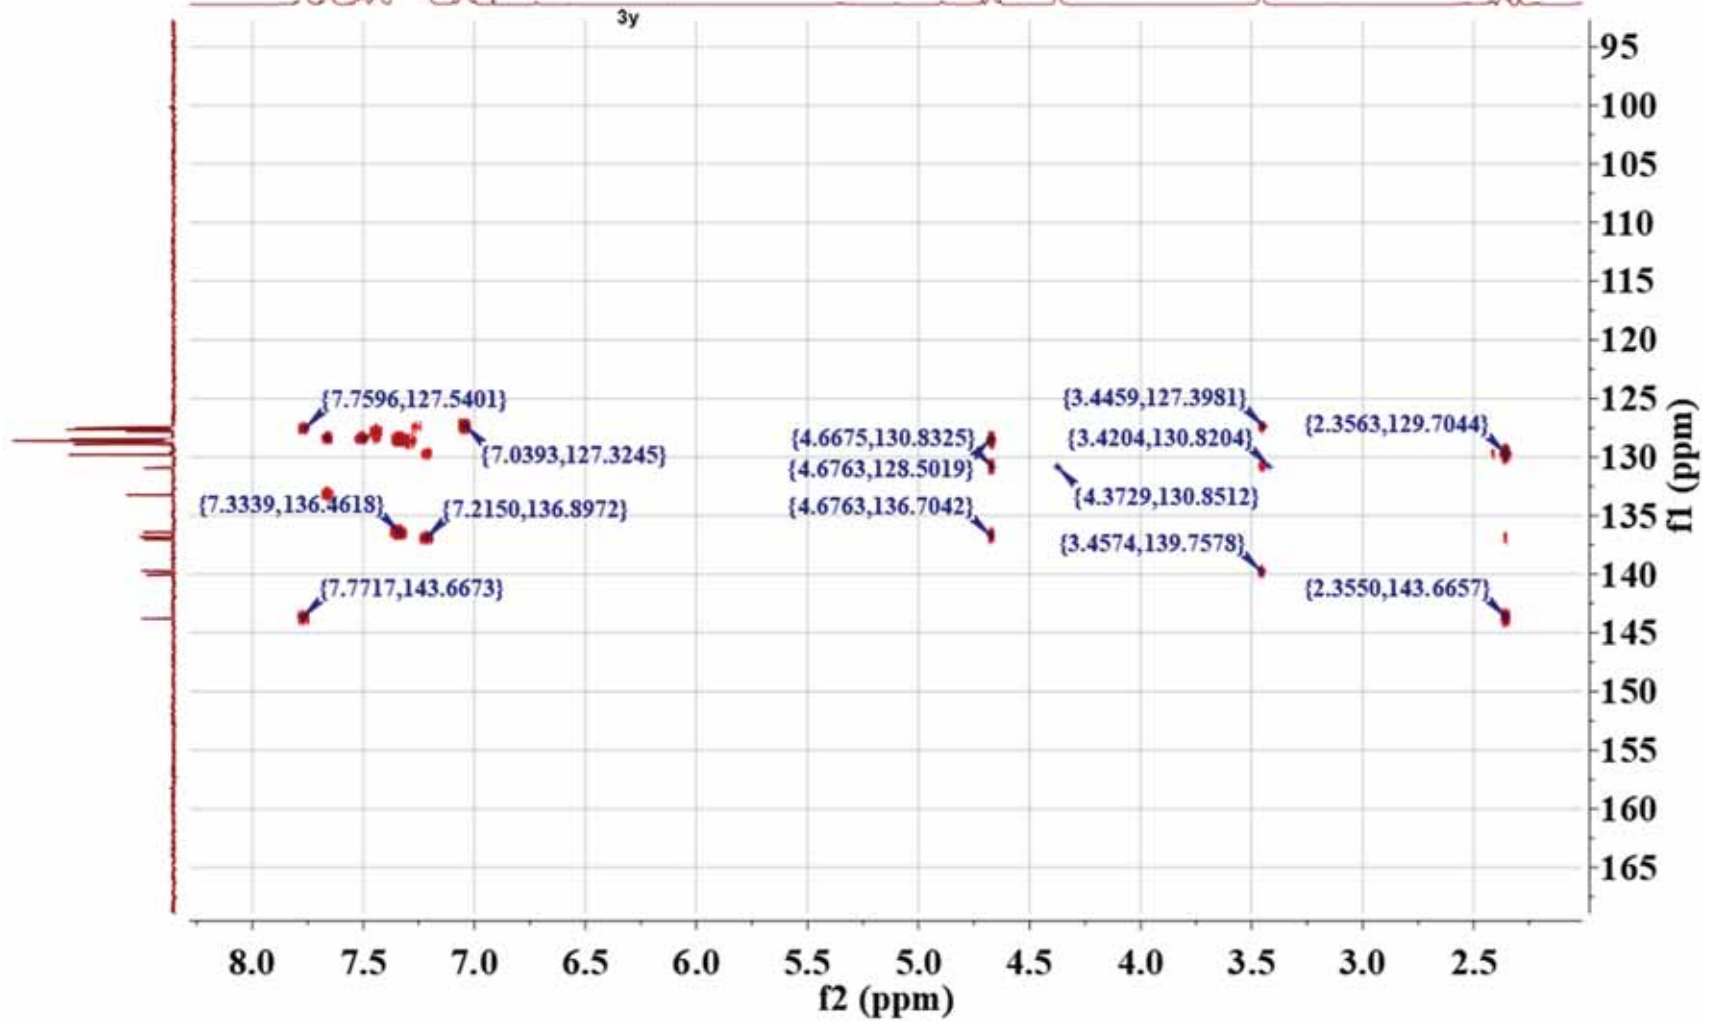

Title WJ5-47  
Solvent CDCl3  
Experiment 2D-NOESY  
Spectrometer Frequency (400.13, 400.13)  
Nucleus (1H, 1H)

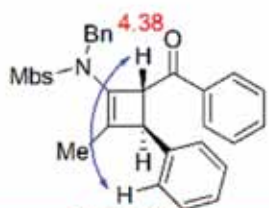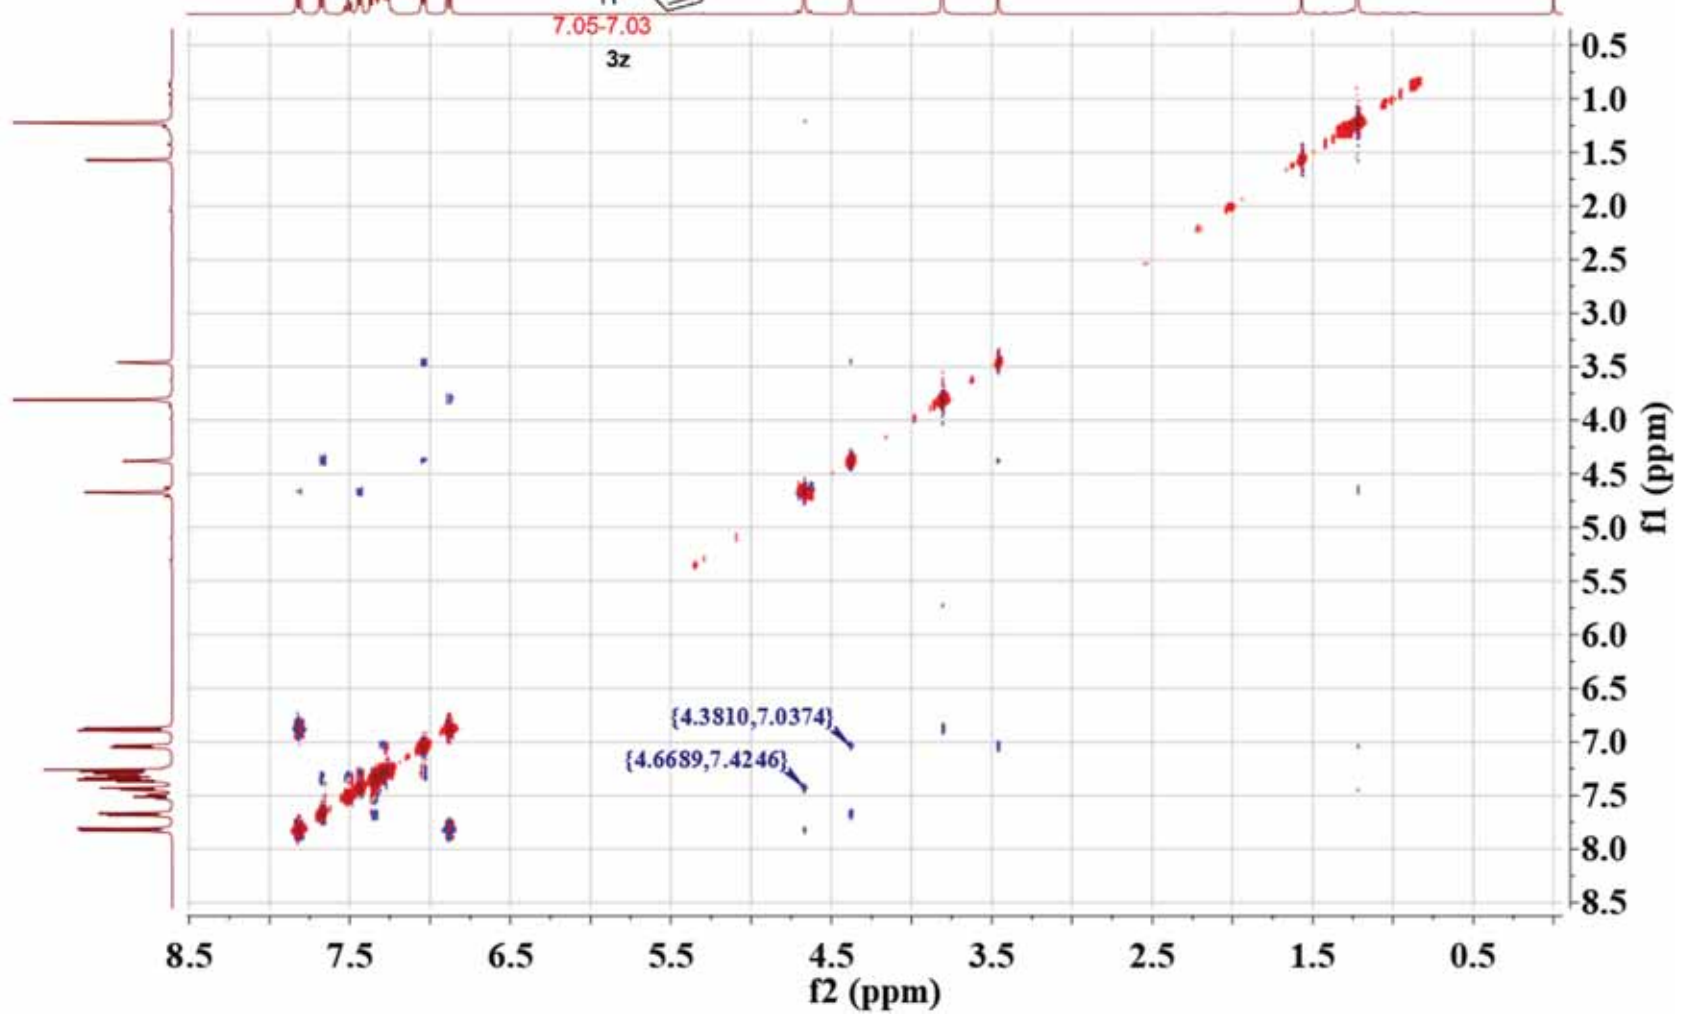

Title WJ5-47  
Solvent CDCl3  
Experiment 2D-NOESY  
Spectrometer Frequency (400.13, 400.13)  
Nucleus (1H, 1H)

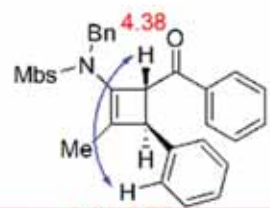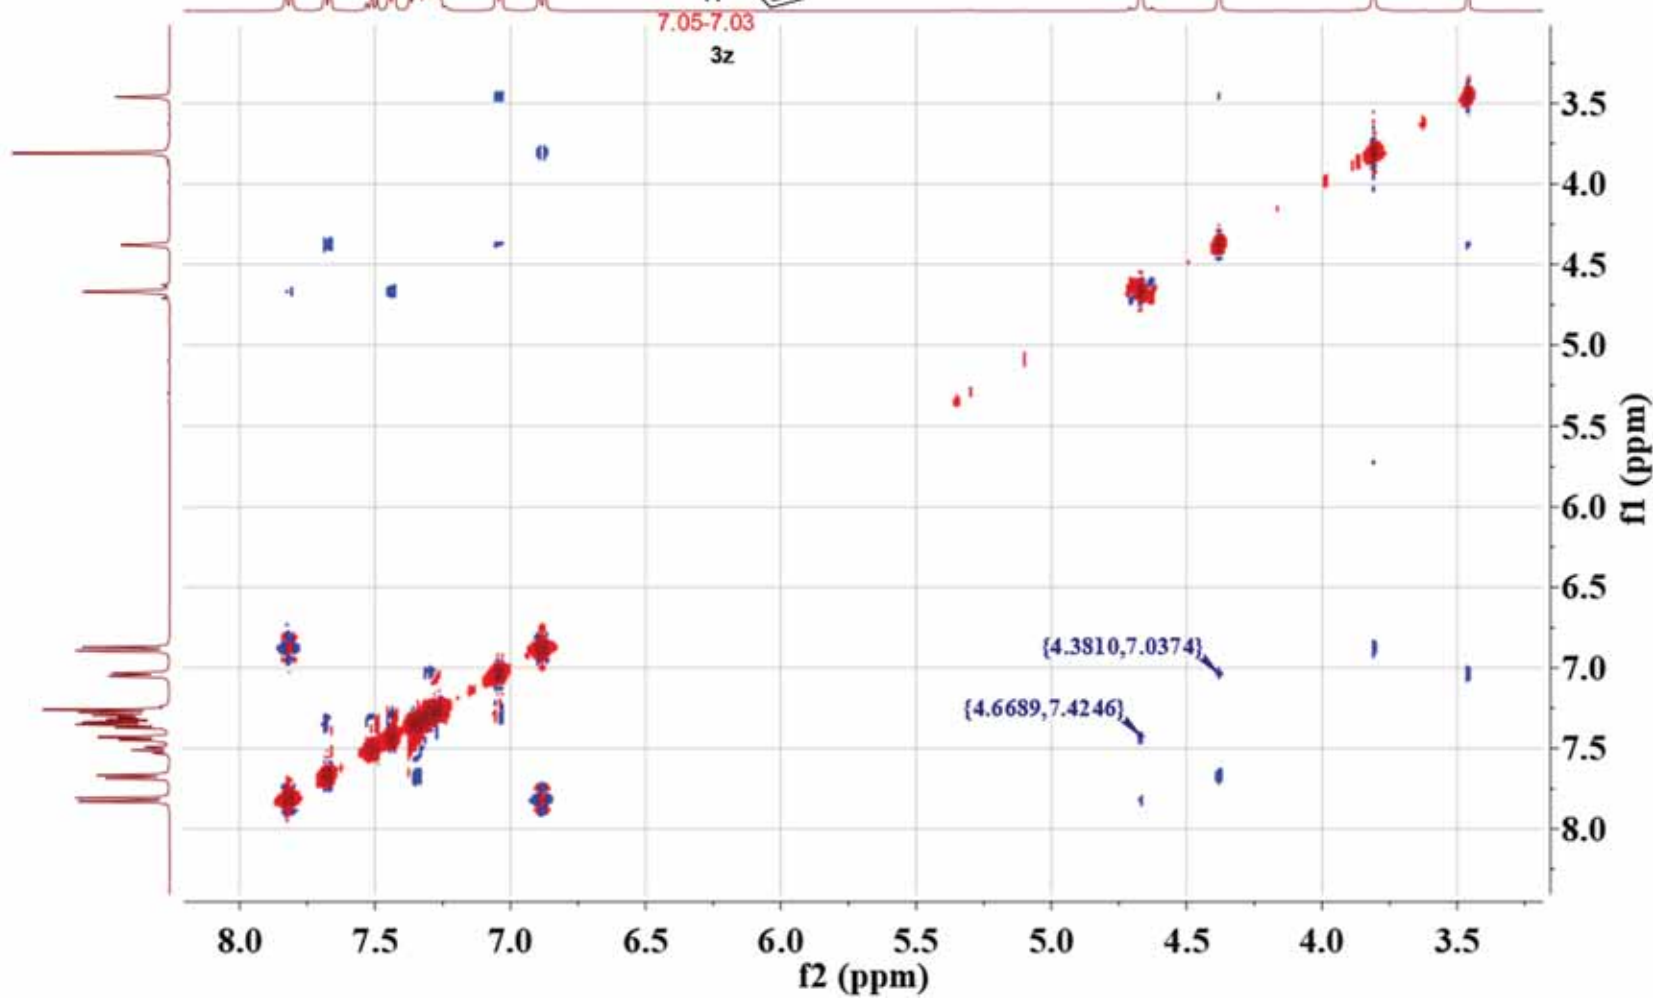

Title WJ5-47  
Solvent CDCl3  
Experiment 2D-COSY  
Spectrometer Frequency (400.13, 400.13)  
Nucleus (1H, 1H)

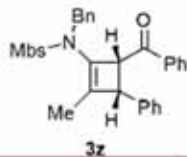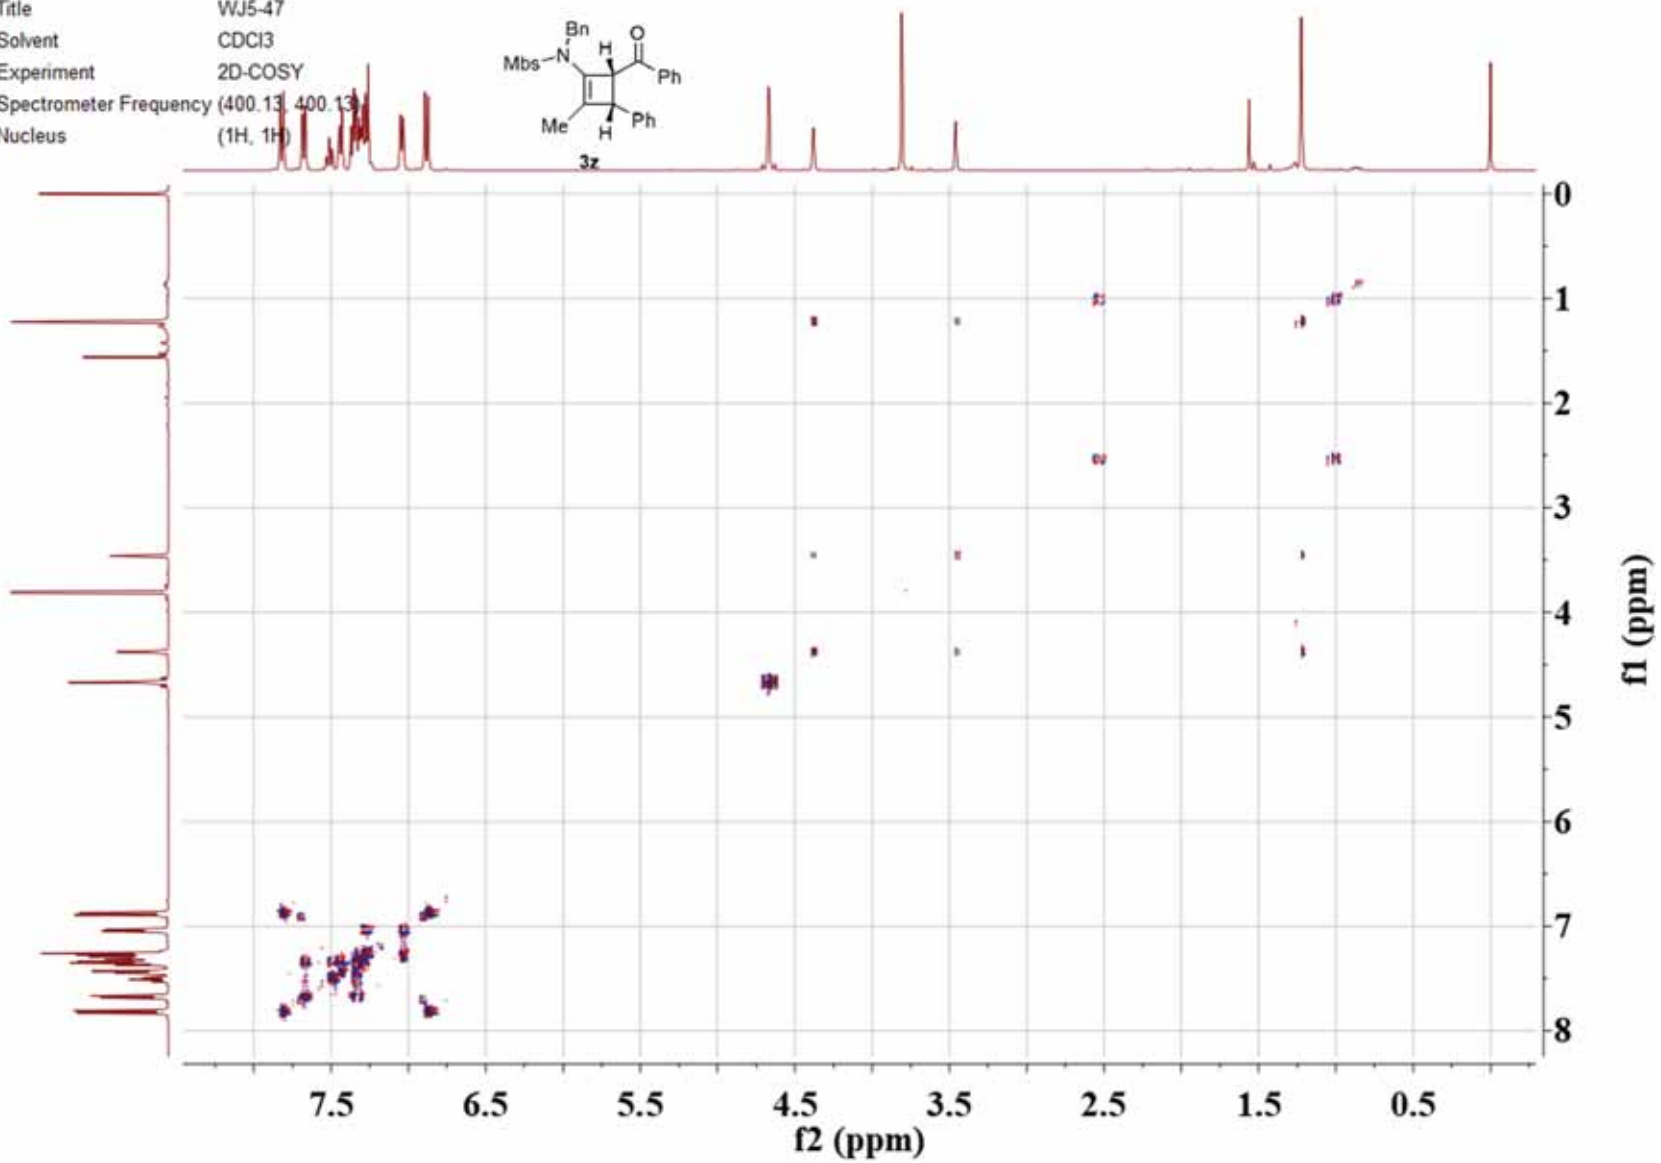

Title WJ5-47  
Solvent CDCl3  
Experiment 2D-COSY  
Spectrometer Frequency (400.13, 400.13)  
Nucleus (1H, 1H)

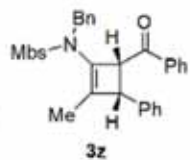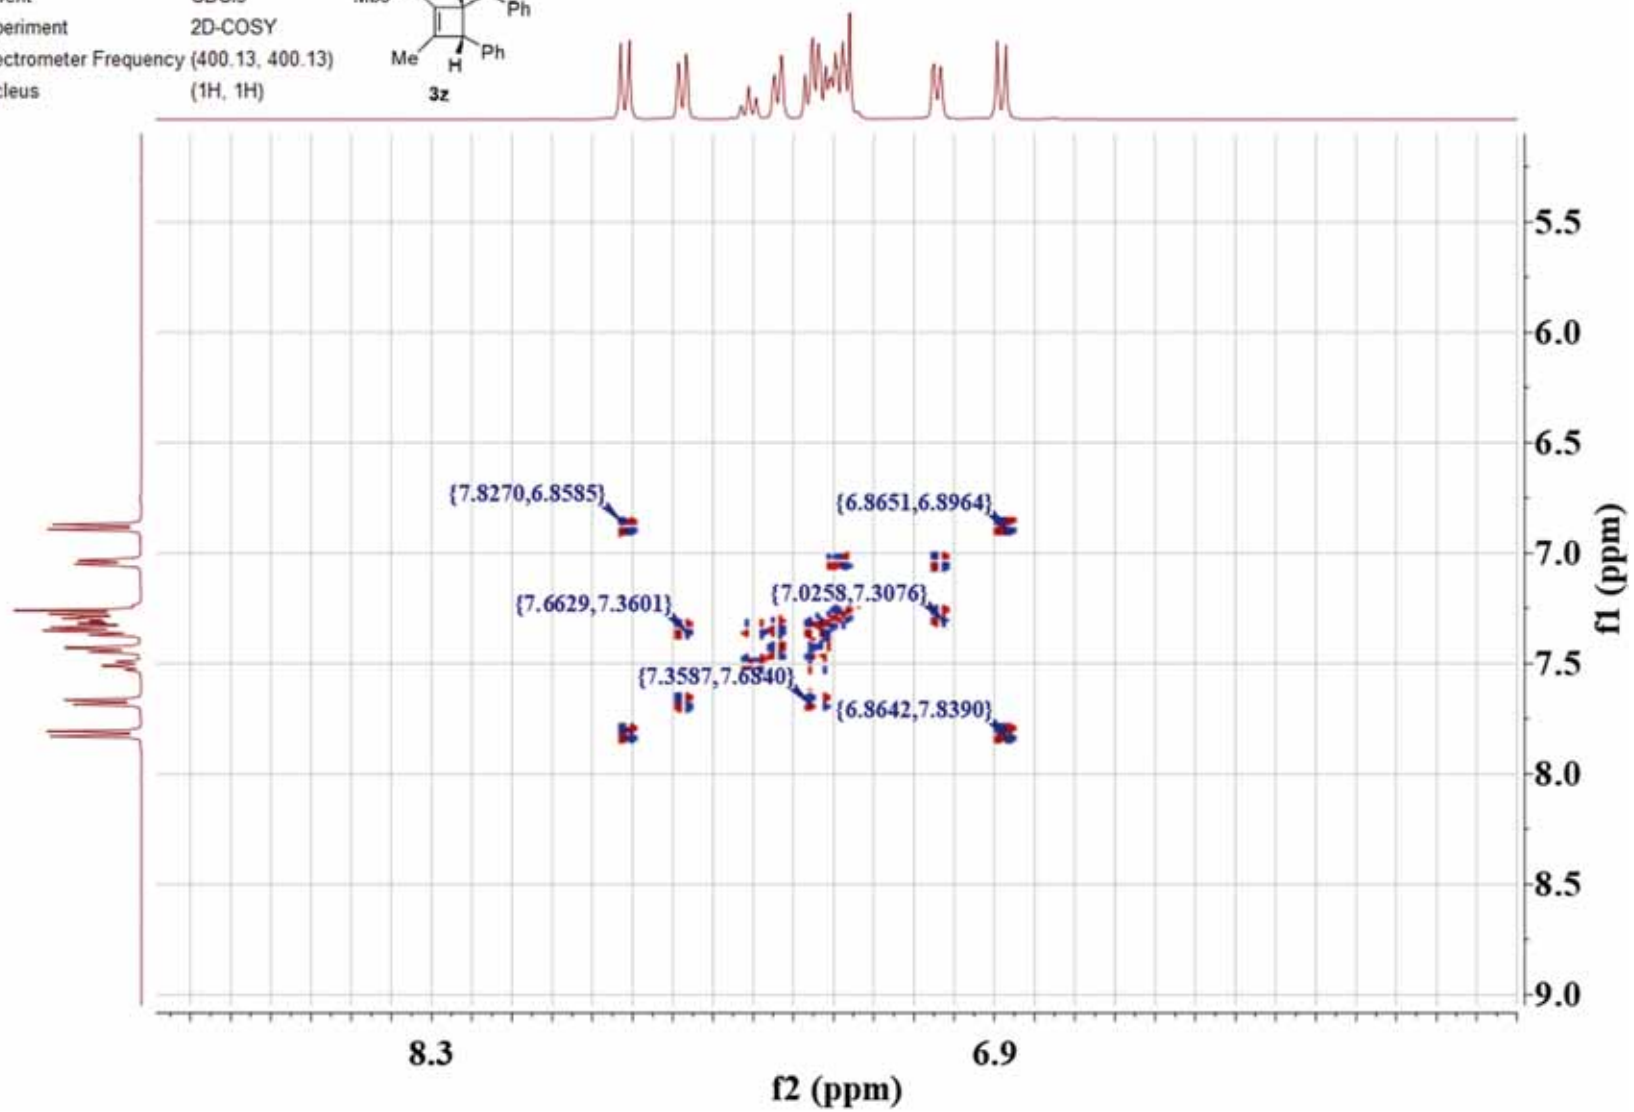



Title WJ5-47  
 Solvent CDCl3  
 Experiment 2D-HSQC-EDITED  
 Spectrometer Frequency (400.13, 100.61)  
 Nucleus (1H, 13C)

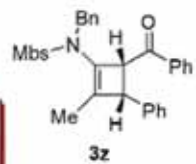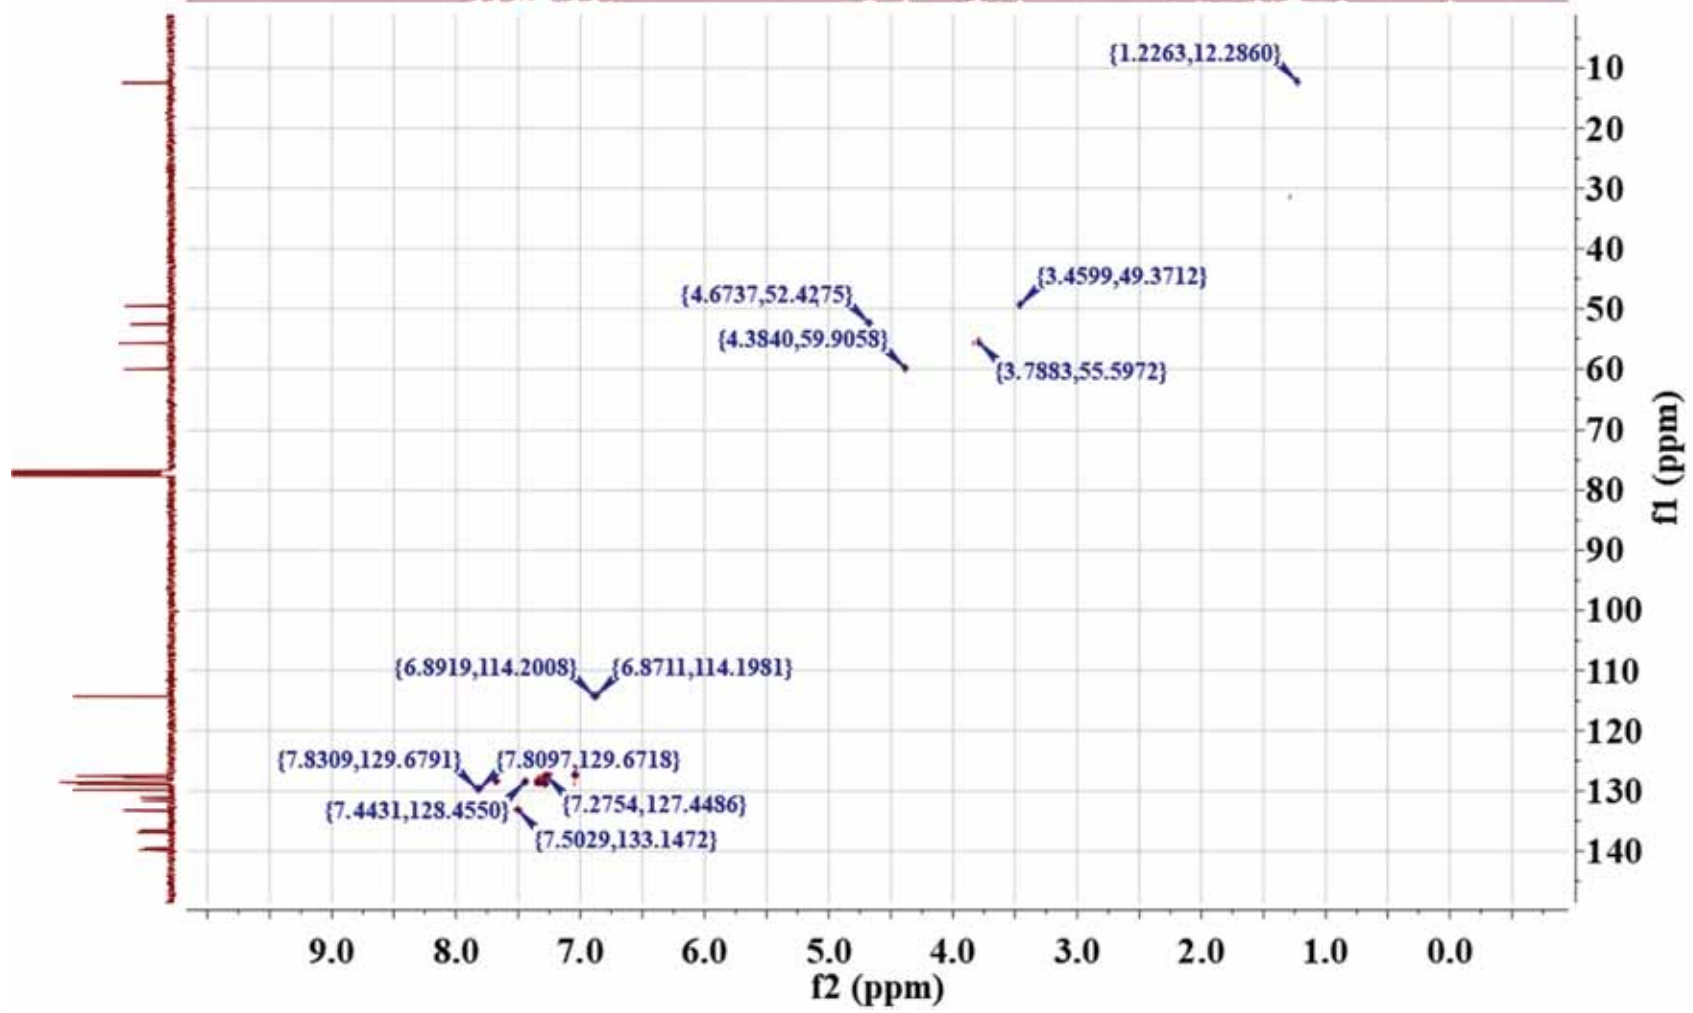

Title WJ5-47  
Solvent CDCl3  
Experiment 2D-HSQC-EDITED  
Spectrometer Frequency (400.13, 100.61)  
Nucleus (1H, 13C)

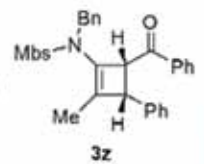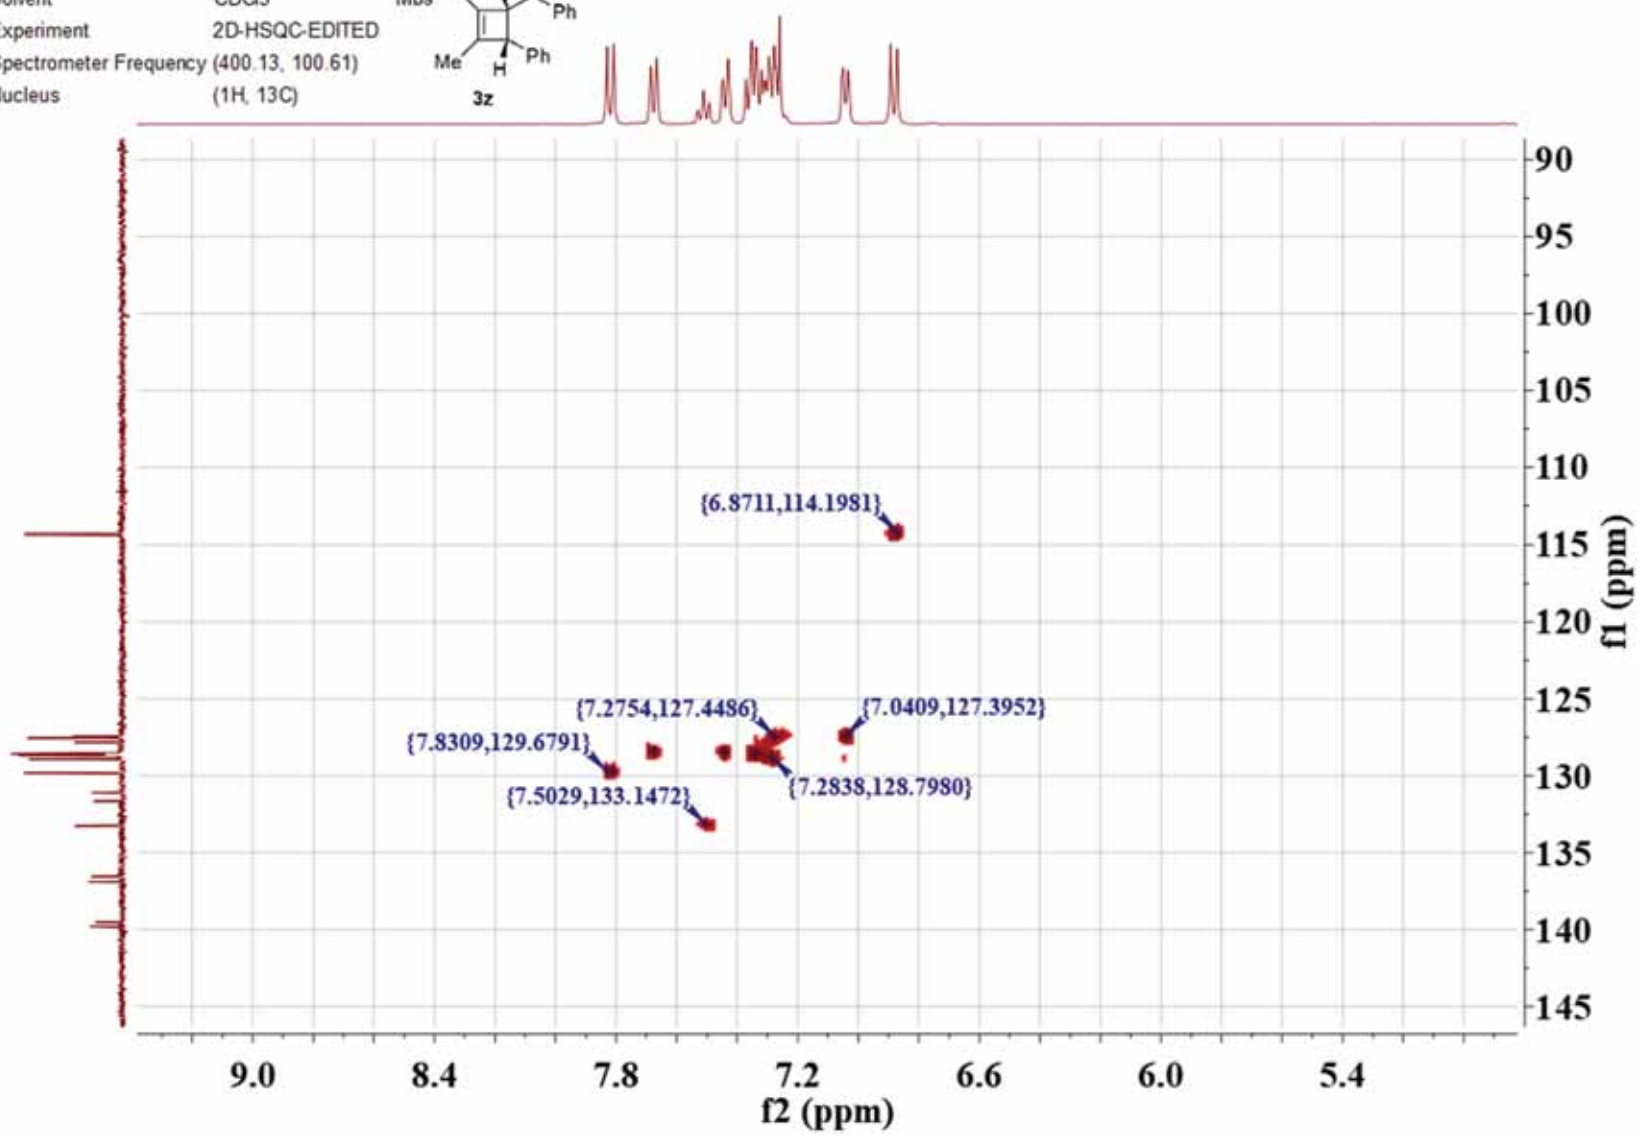

Title WJ5-47  
Solvent CDCl3  
Experiment 2D-HMBC  
Spectrometer Frequency (400.13, 100.61)  
Nucleus (1H, 13C)

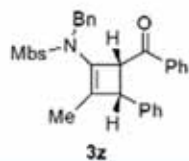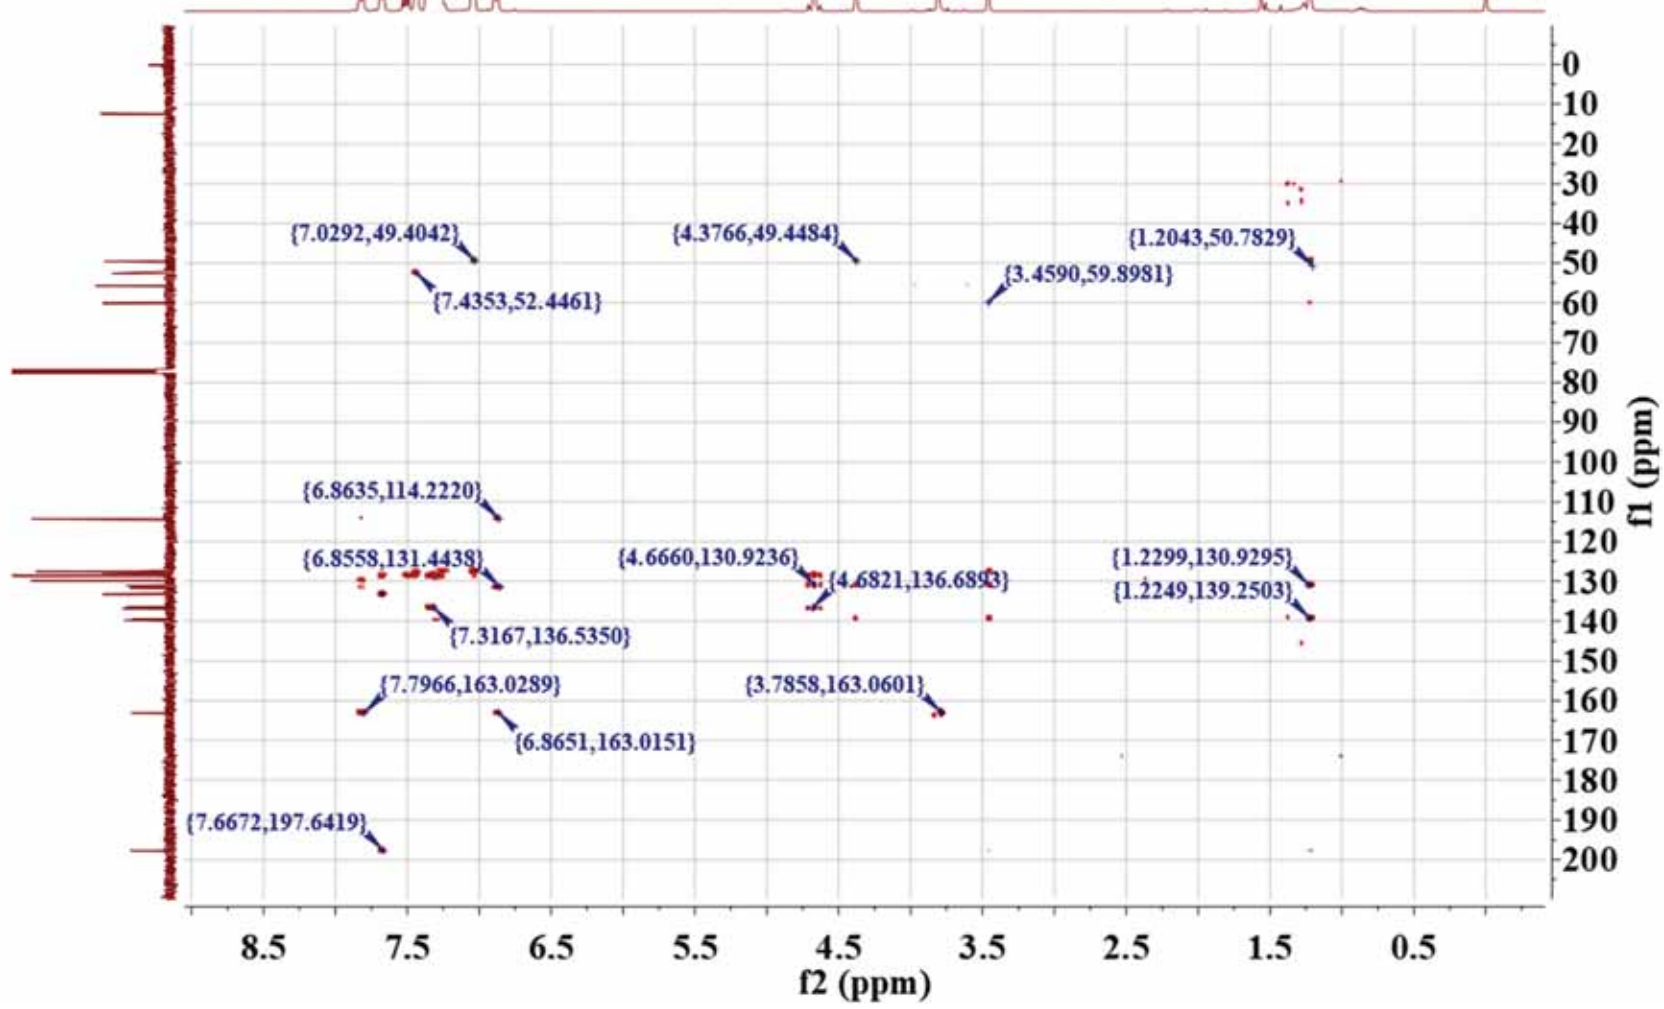

Title WJ5-47  
Solvent CDCl3  
Experiment 2D-HMBC  
Spectrometer Frequency (400.13, 100.61)  
Nucleus (1H, 13C)

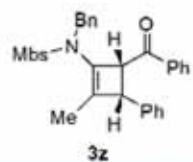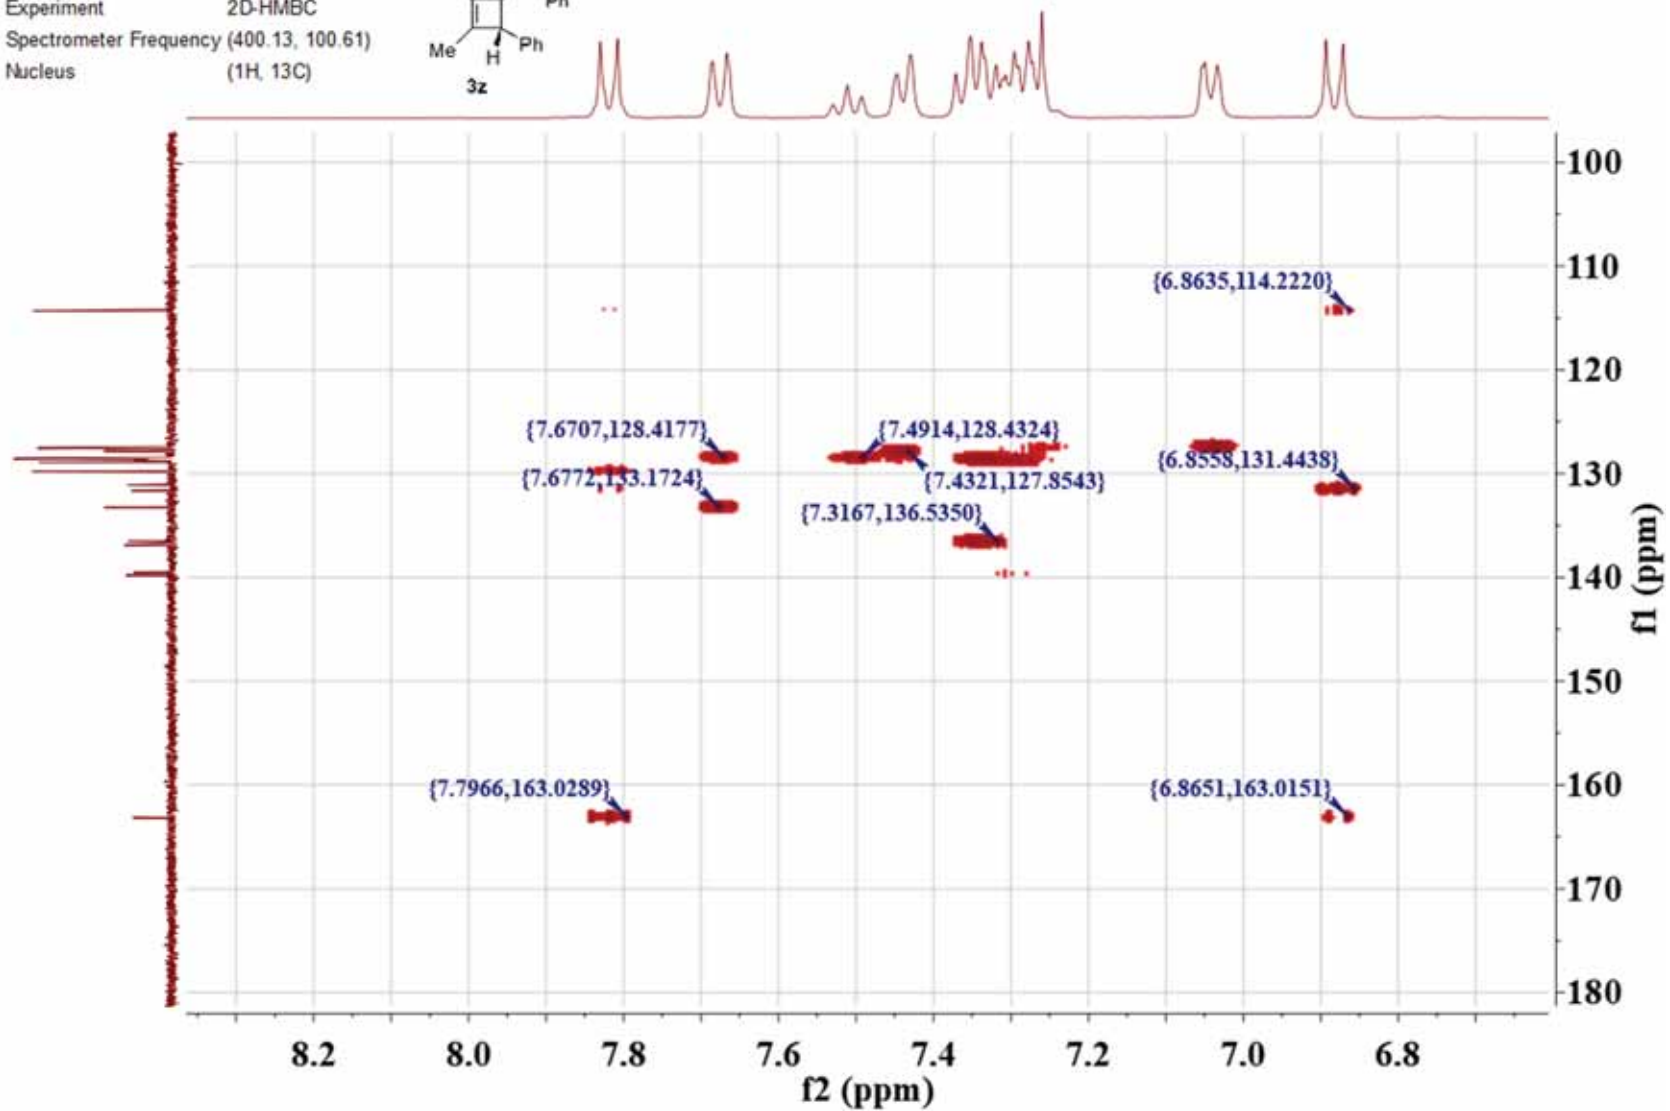

Supplement: d4ob00470a1.pdf [file d4ob00470a1.pdf]
