# Supplementary material for: Brønsted acid catalyzed Ficini [2 + 2] cycloaddition of ynamides with enones
Source: Royal Society of Chemistry journal article supplement (doi:10.1039/d4ob00470a), 2024-01-01

## Part II Copies of $^1\text{H}$ NMR, $^{13}\text{C}\{^1\text{H}\}$ NMR, and NOESY Spectra.

### $^1\text{H}$ NMR and $^{13}\text{C}\{^1\text{H}\}$ NMR Spectra of Cyclobutenamides **3**, Bicyclic Ketones **4**, and Amide **5b**.

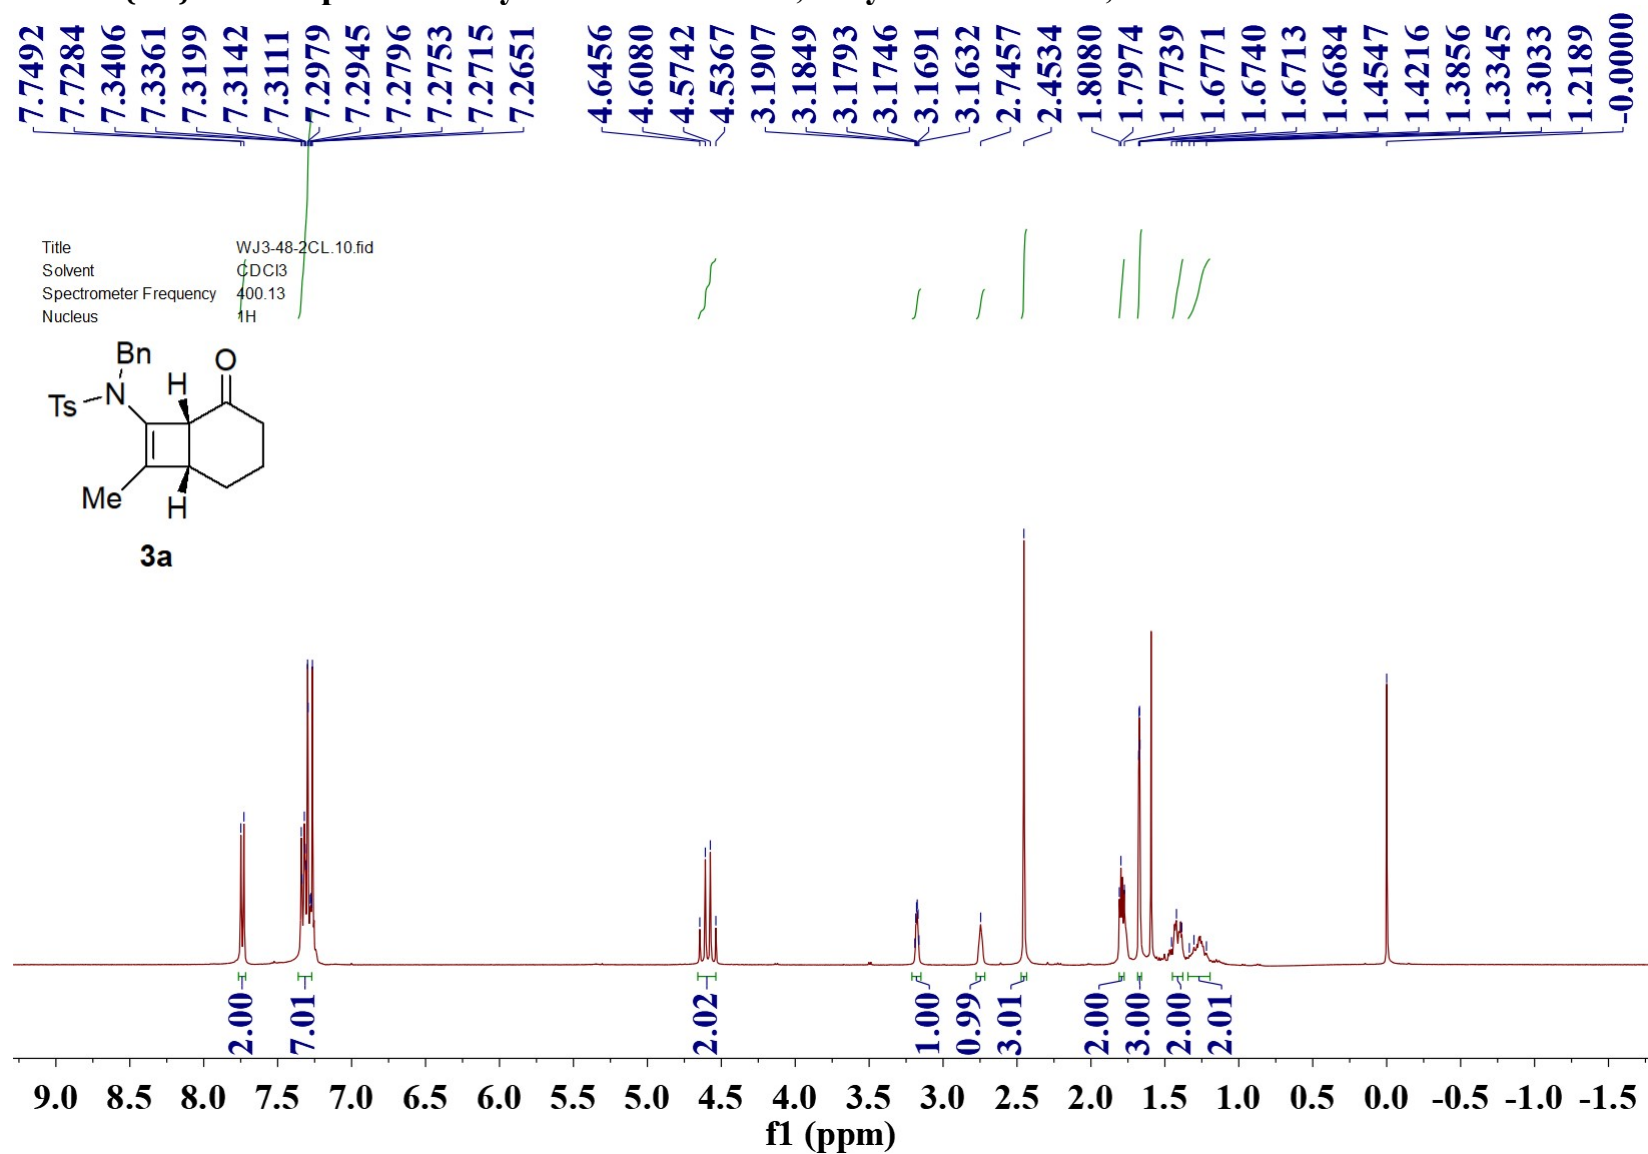

210.736

144.124  
144.026  
136.641  
136.462  
129.853  
128.624  
127.942  
127.743  
127.629  
126.745

77.518  
77.201  
76.882

53.933  
51.288  
40.499  
38.569

23.791  
21.811  
17.122  
12.603

Title WJ3-TS2.10.fid  
Solvent CDCl3  
Spectrometer Frequency 100.62  
Nucleus 13C

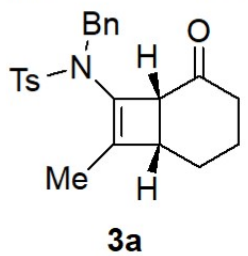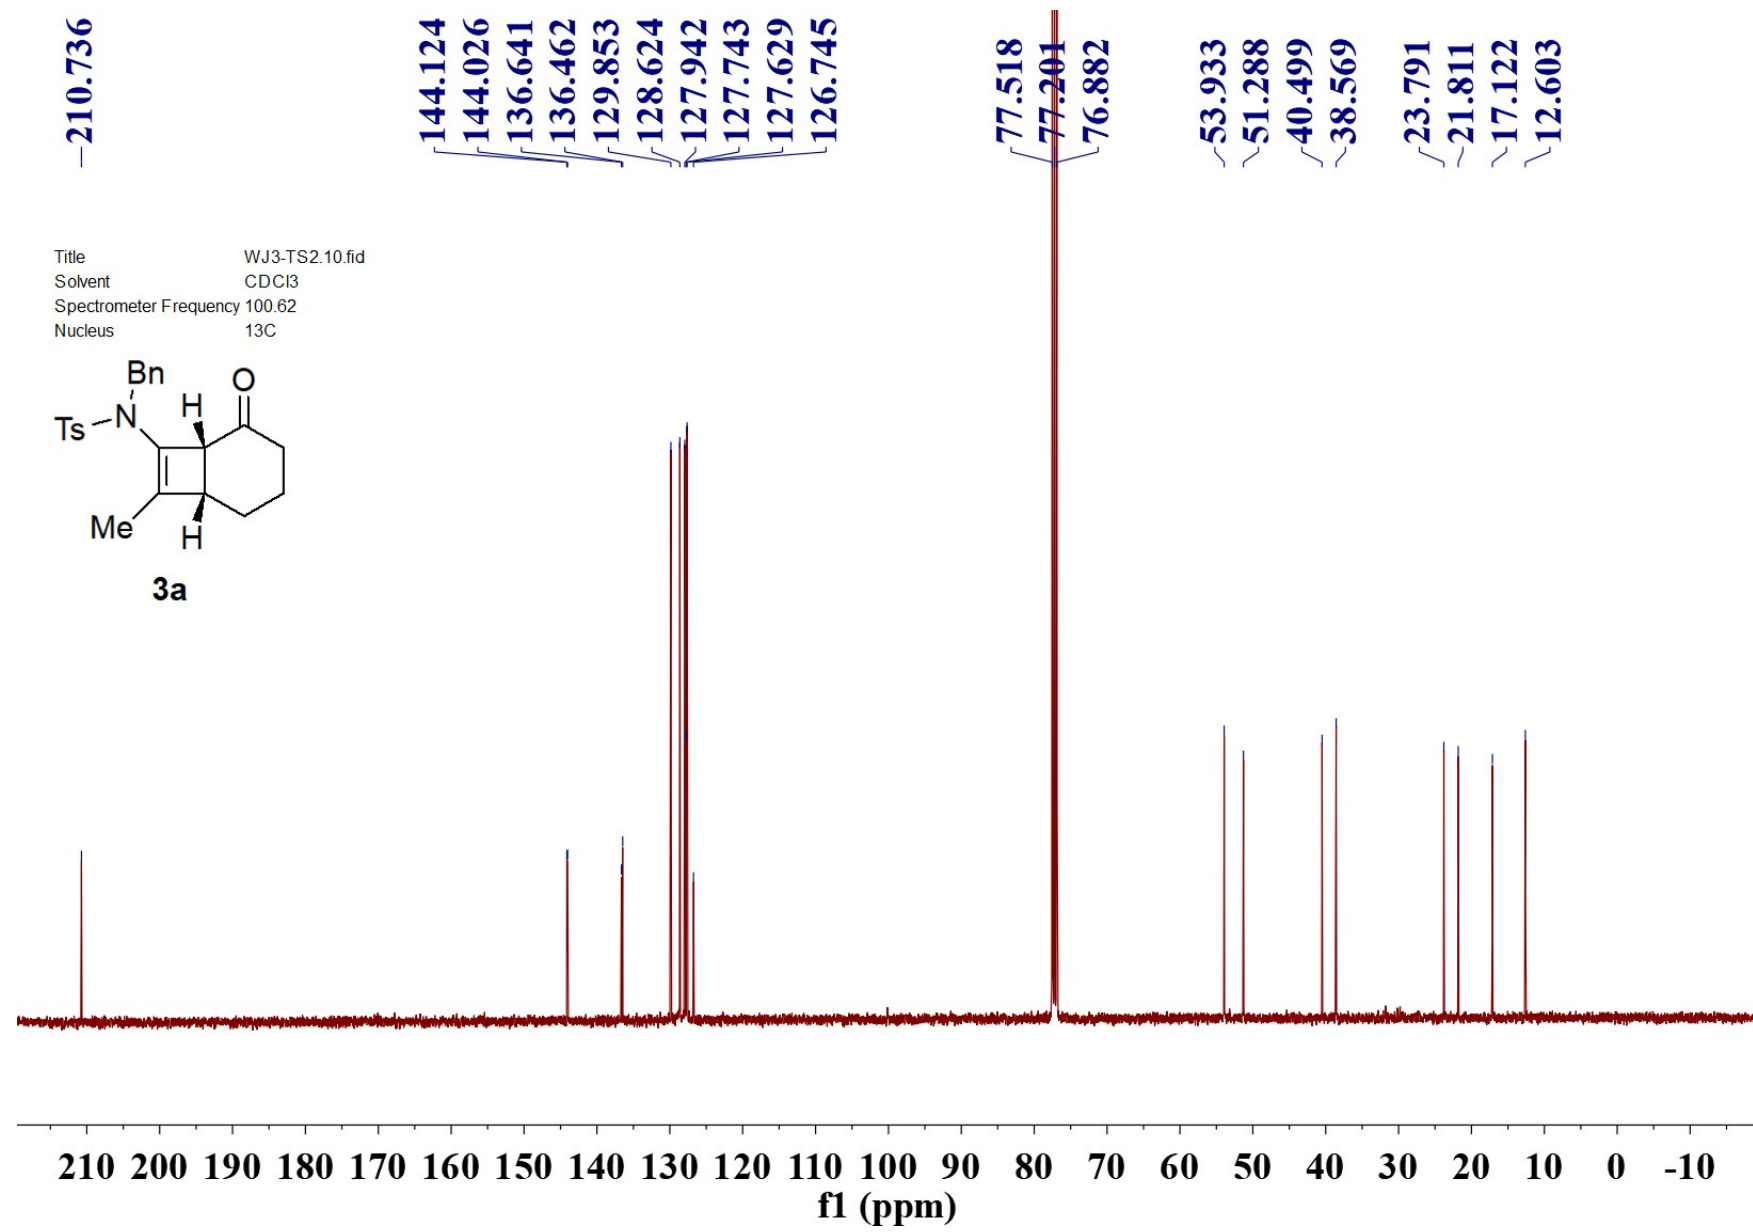

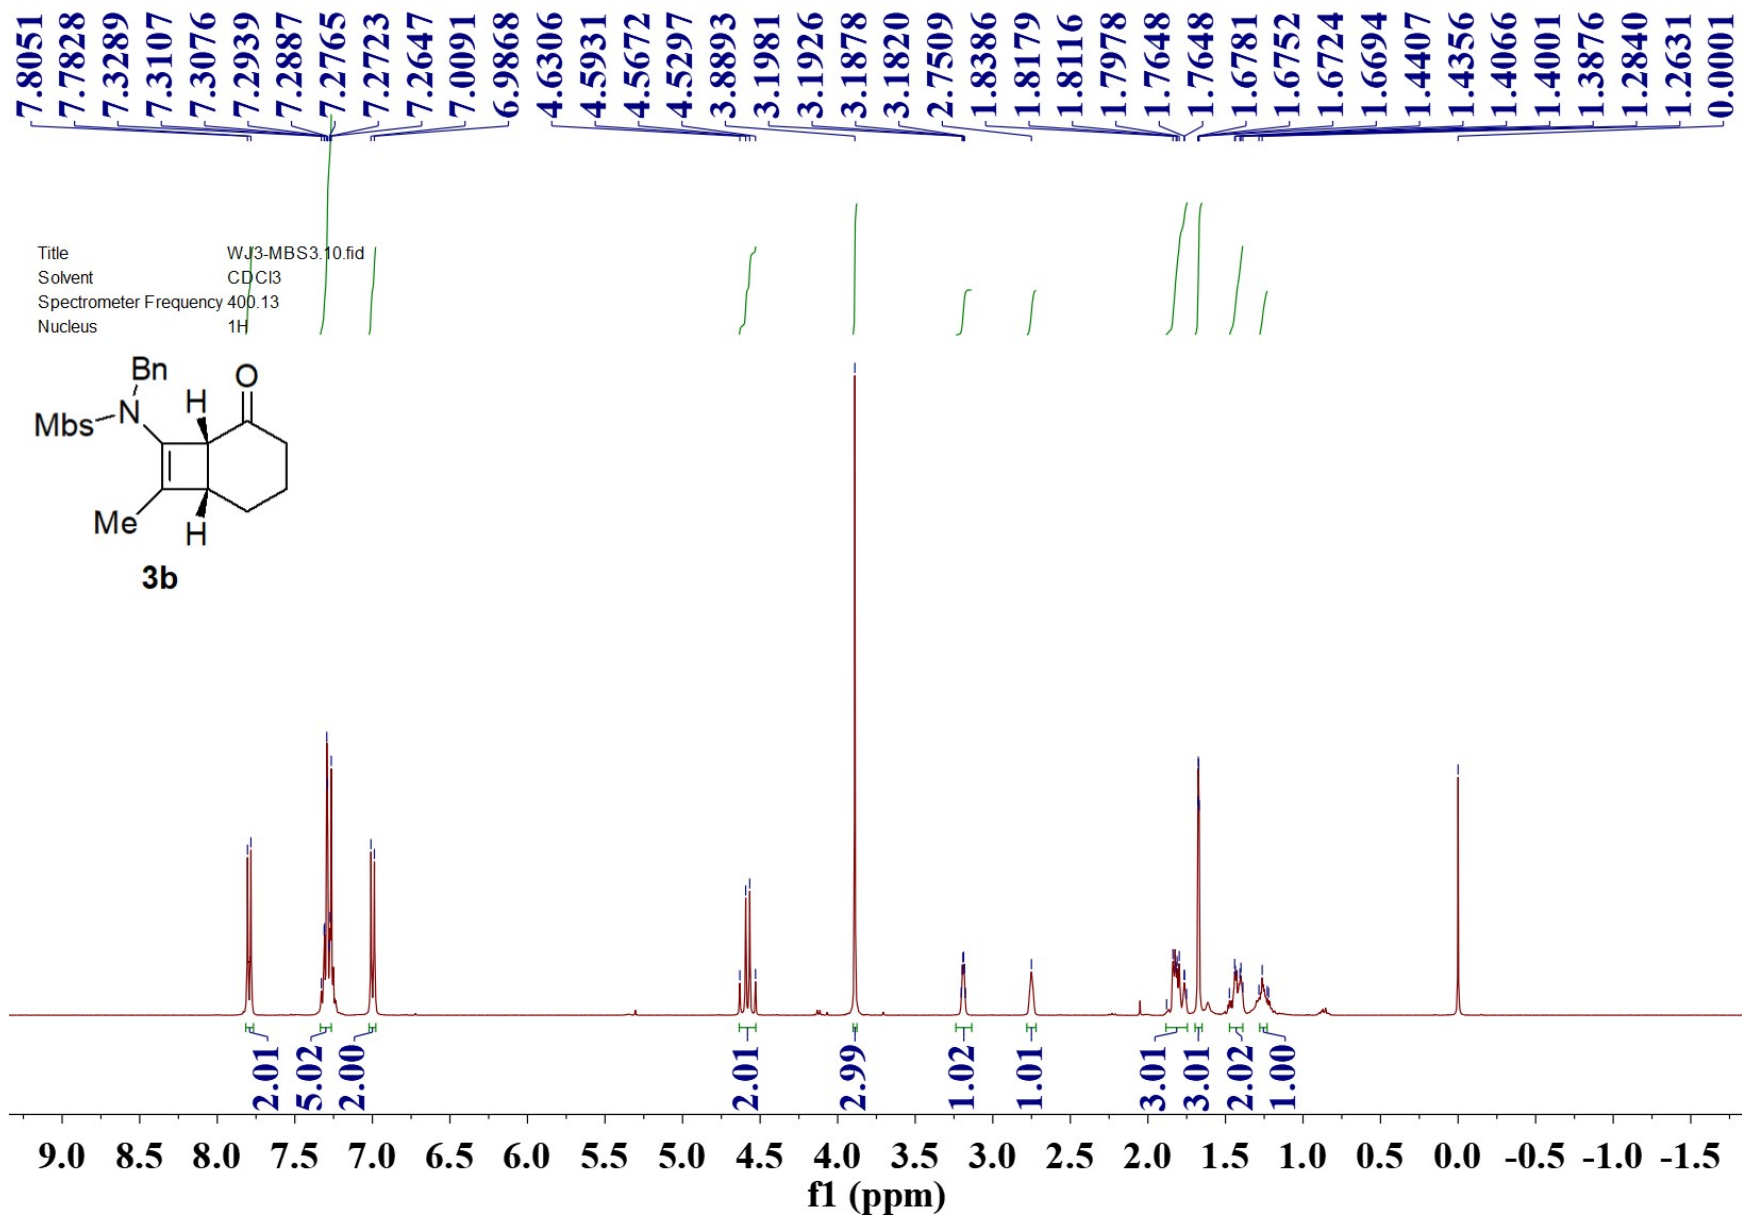

210.675

163.321  
144.004  
136.469  
131.164  
129.730  
128.595  
127.925  
127.717  
126.900  
114.355

77.518  
77.200  
76.883

55.806  
53.995  
51.251  
40.525  
38.560

23.776  
17.108  
12.569

Title WJ3-52.10.fid  
Solvent CDCl3  
Spectrometer Frequency 100.62  
Nucleus 13C

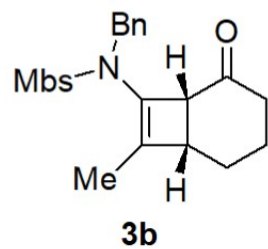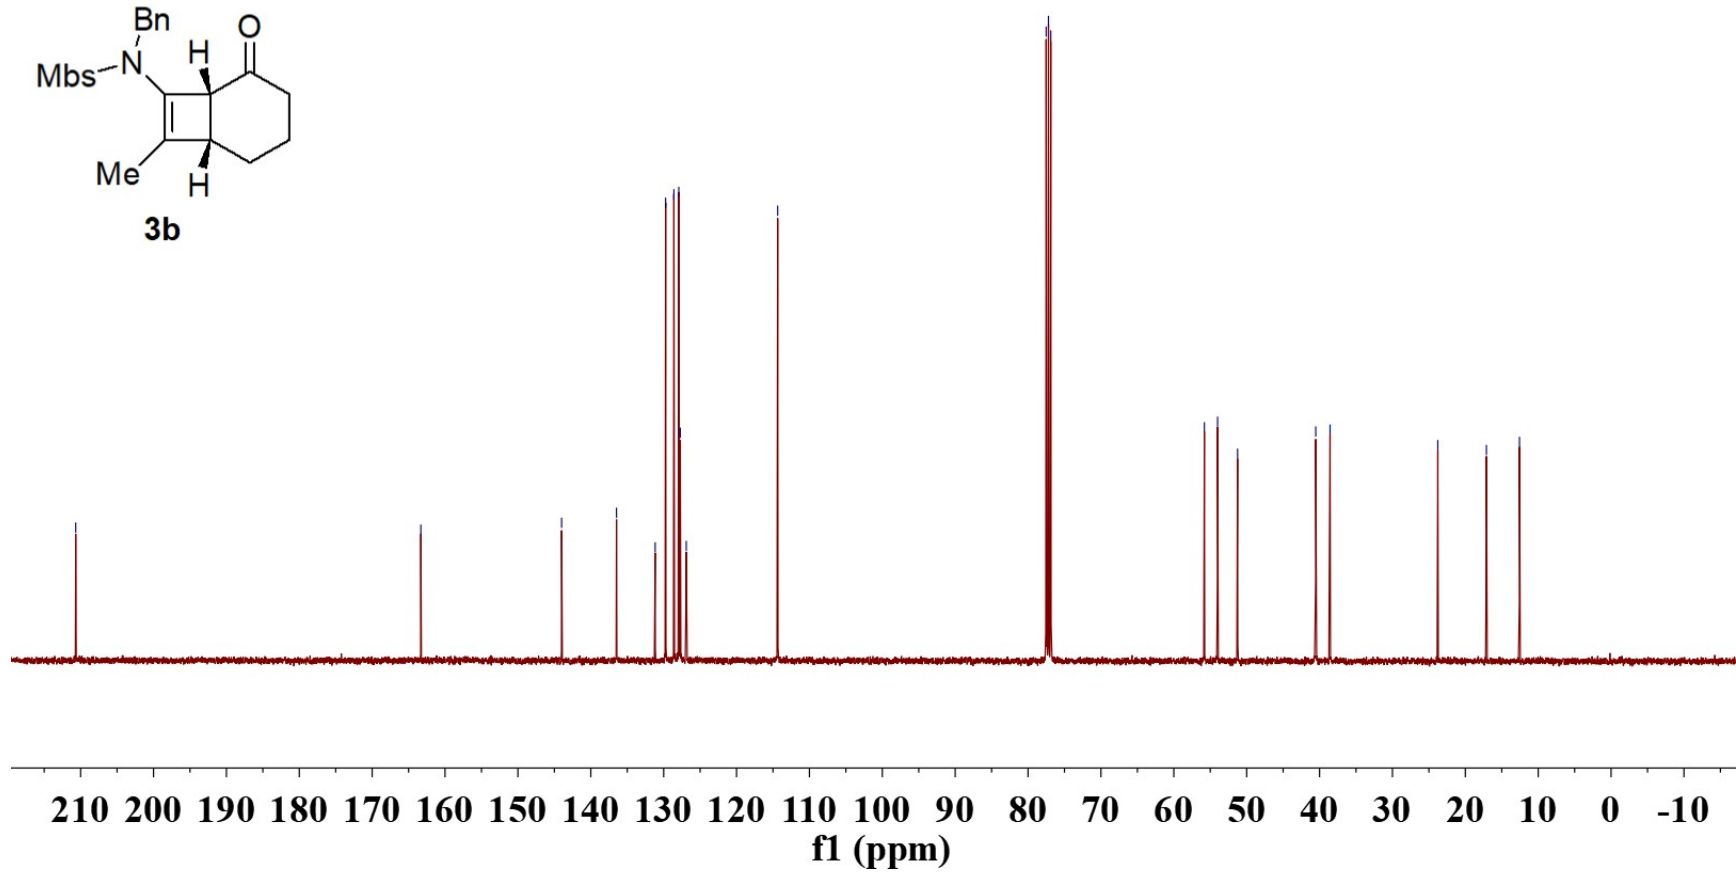



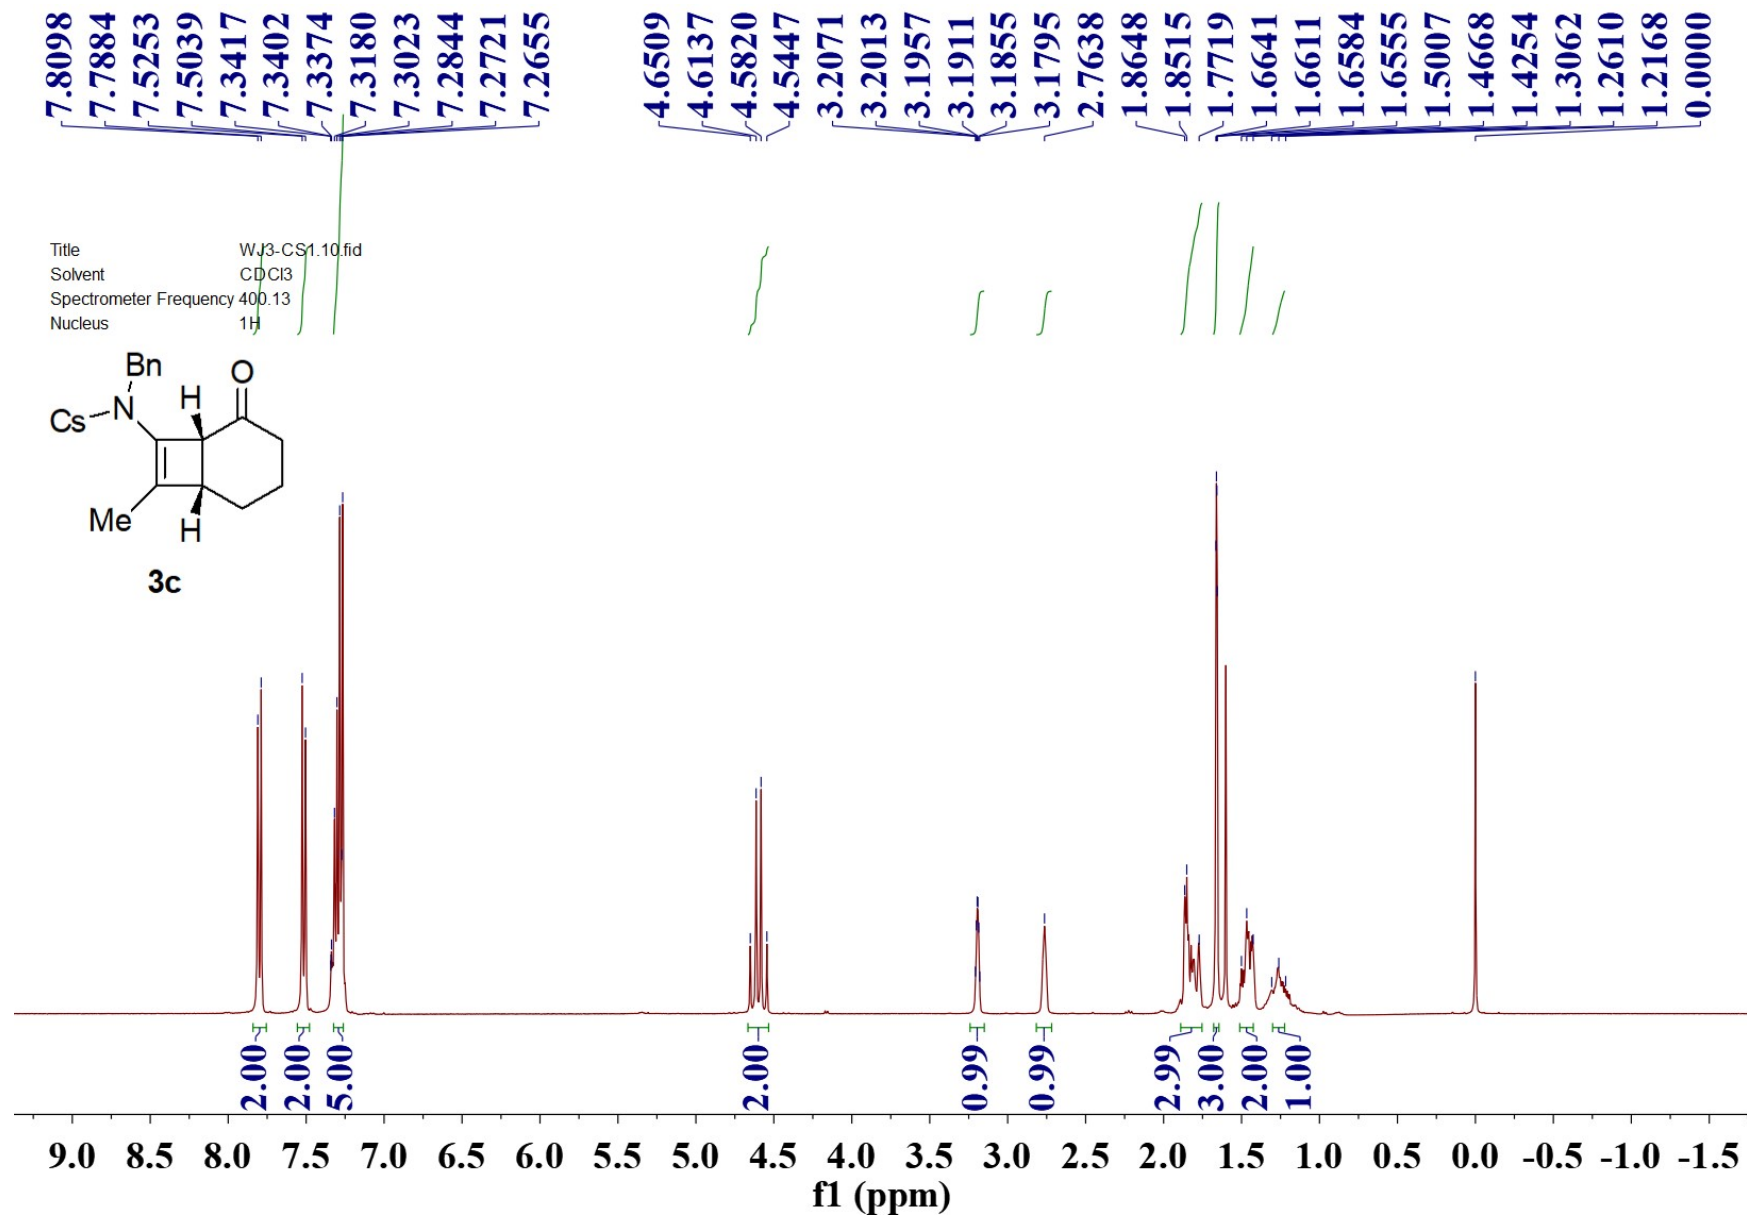

210.260

144.726  
139.575  
138.002  
135.918  
129.392  
128.932  
128.558  
127.840  
127.789  
126.209

53.608  
51.362  
40.569  
38.475

23.643  
17.020  
12.445

Title WJ4-CS.10.fid  
Solvent CDCl3  
Spectrometer Frequency 100.62  
Nucleus 13C

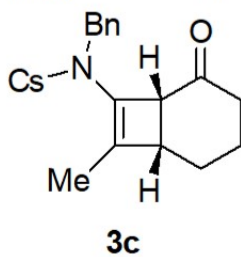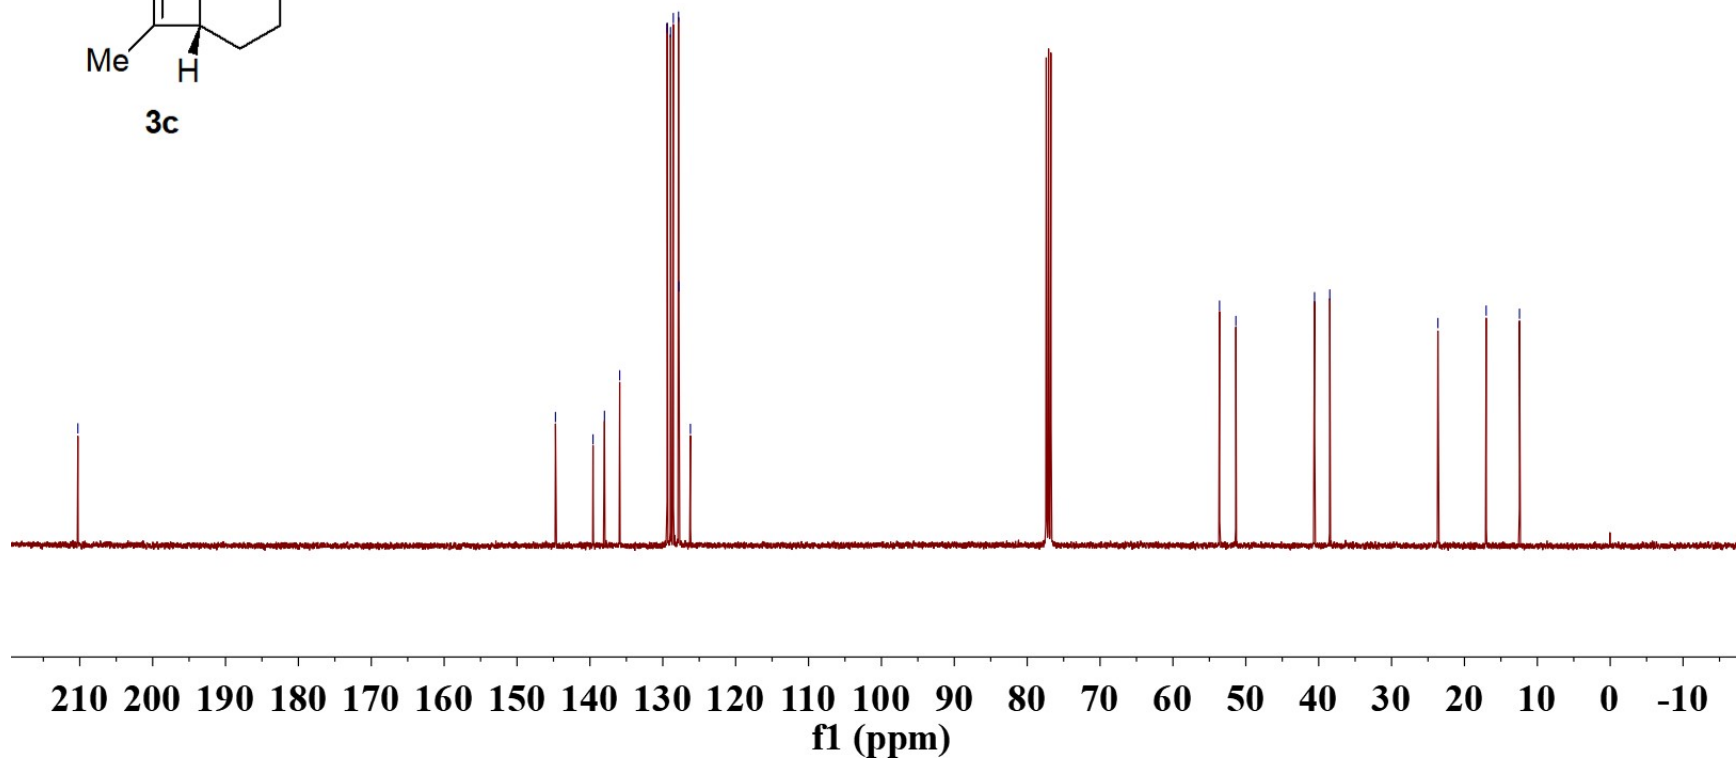

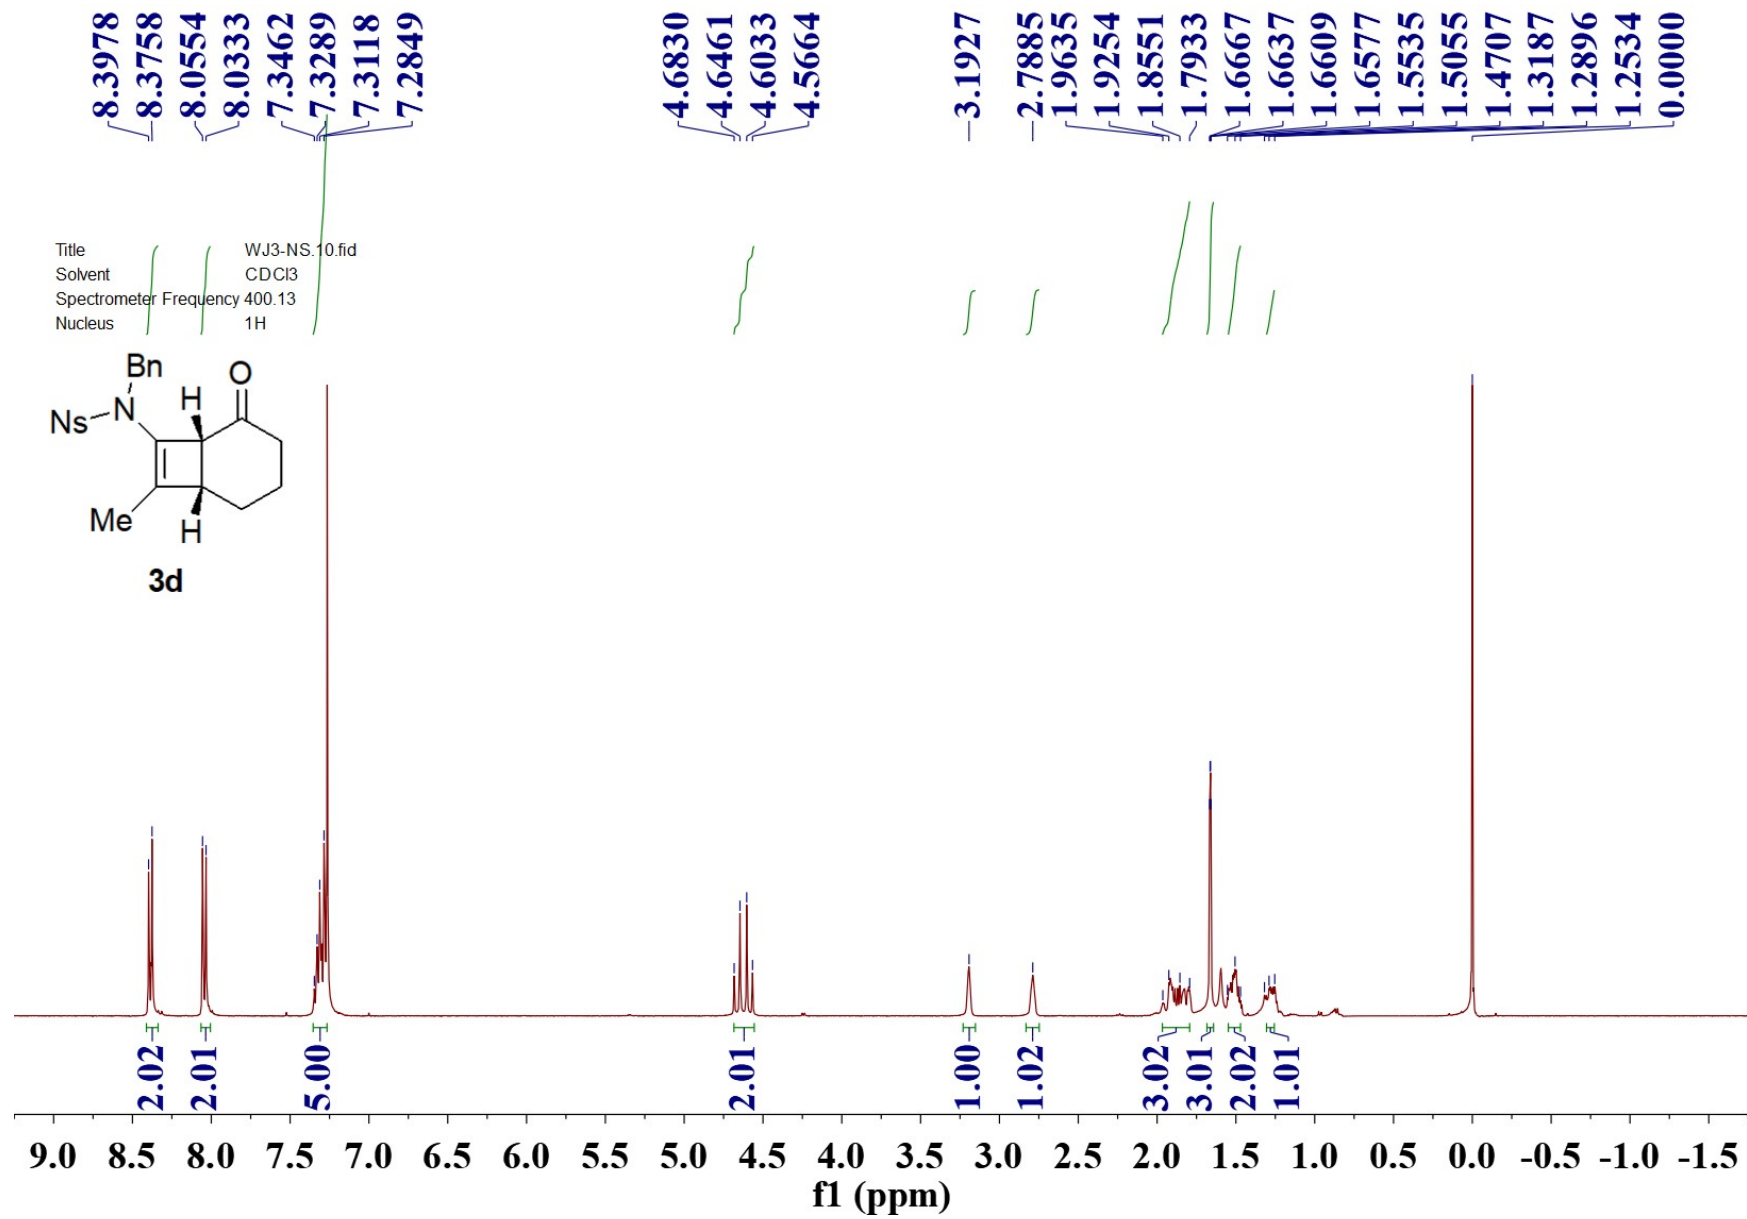

210.115

150.359  
146.116  
145.536  
135.552  
128.863  
128.811  
128.184  
128.067  
125.784  
124.488

77.518  
77.200  
76.882

53.390  
51.804  
41.004  
38.701

23.825  
17.241  
12.586

Title WJ3-NS2.10.fid  
Solvent CDCl3  
Spectrometer Frequency 100.62  
Nucleus 13C

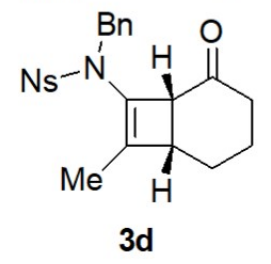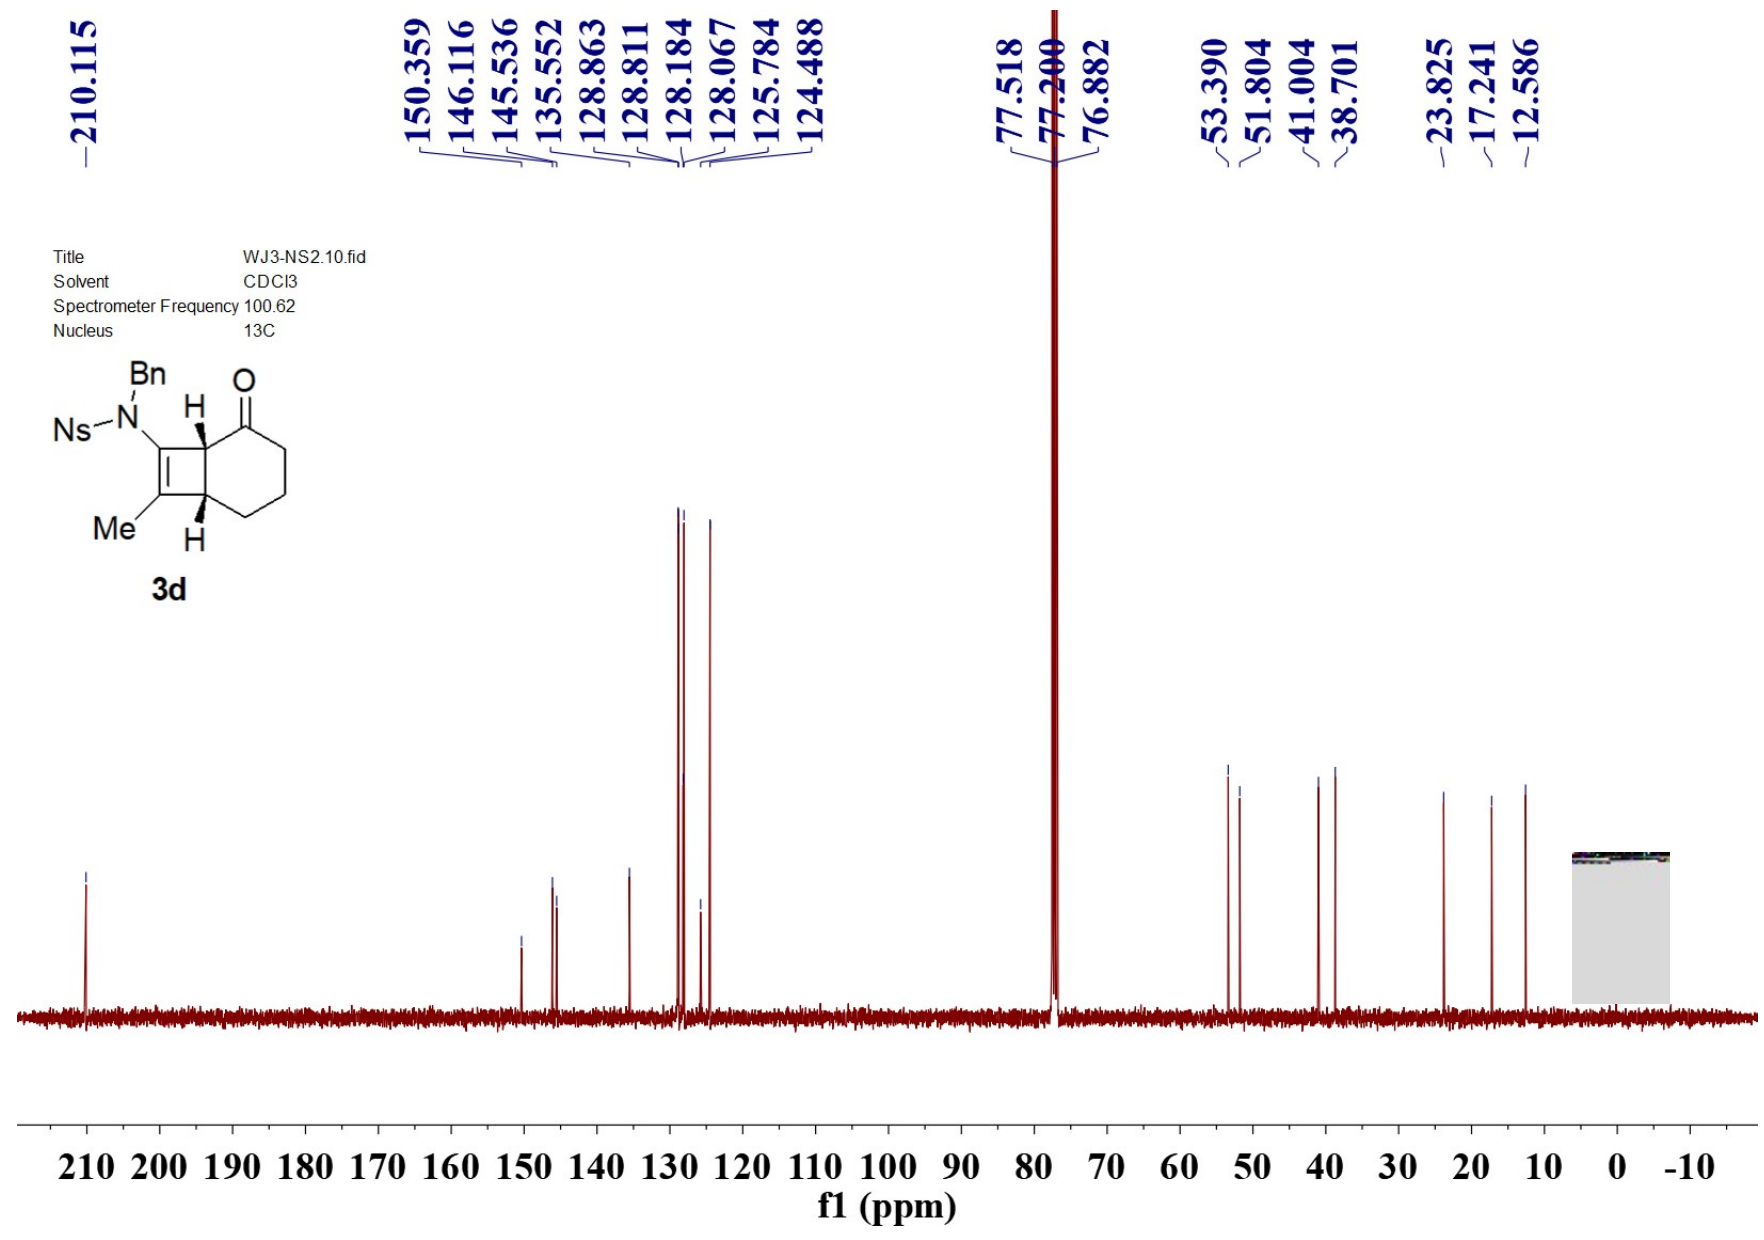

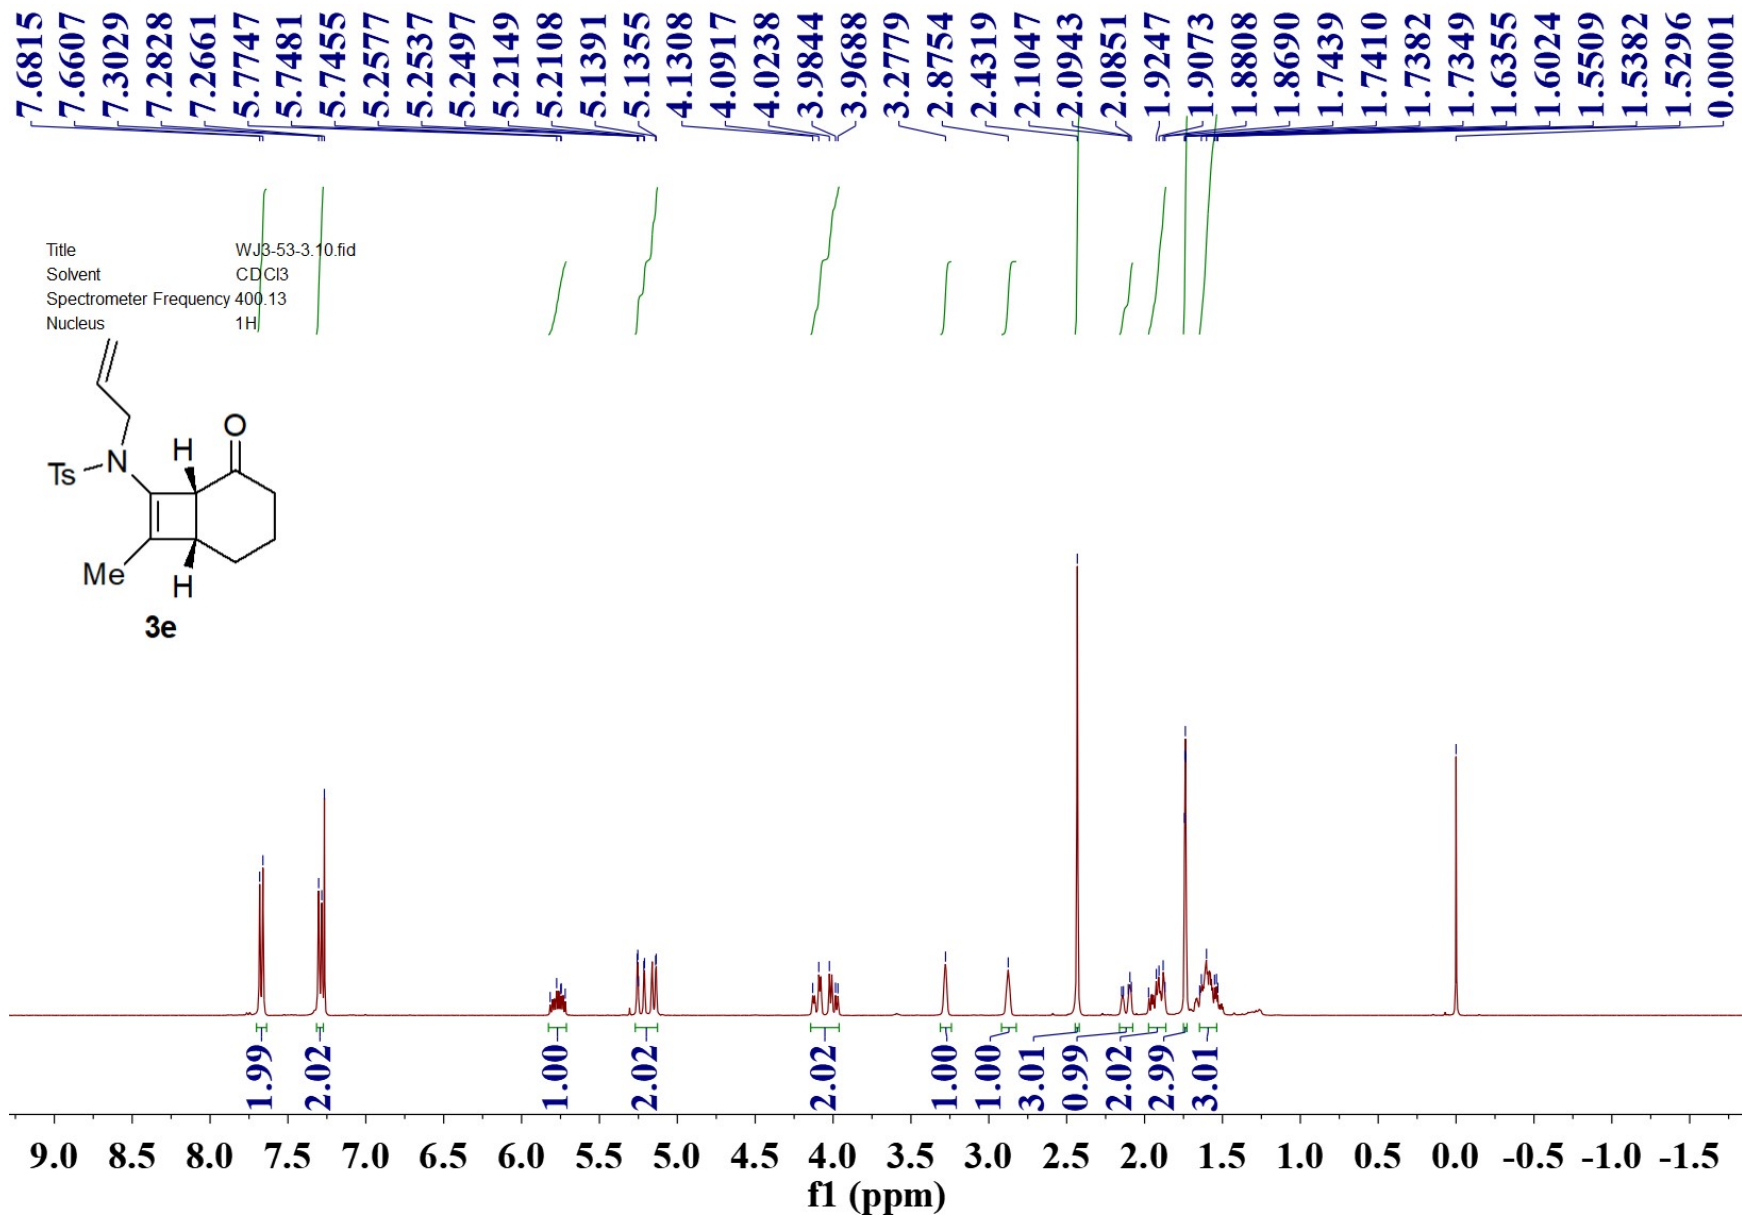

-210.544

143.927  
143.210  
136.755  
133.674  
129.752  
127.586  
126.873  
117.765

77.519  
77.202  
76.885

53.920  
50.346  
40.574  
38.604

23.882  
21.779  
17.298  
12.623

Title WJ3-YX2.10.fid  
Solvent CDCl3  
Spectrometer Frequency 100.62  
Nucleus 13C

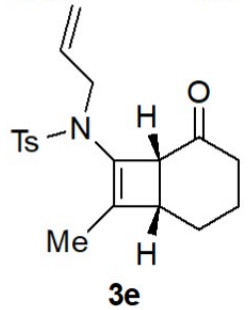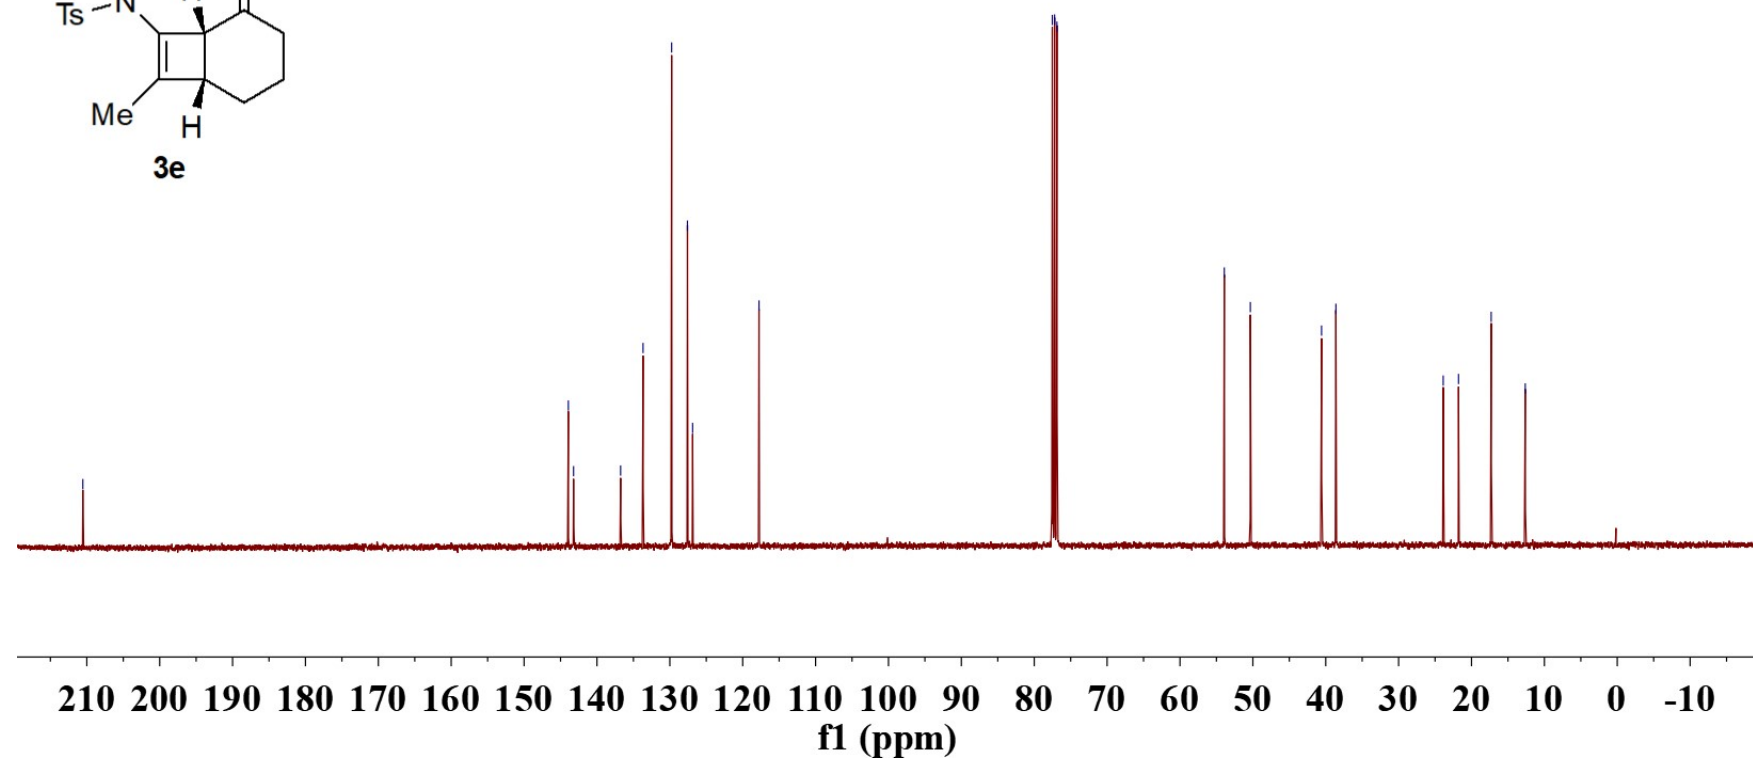



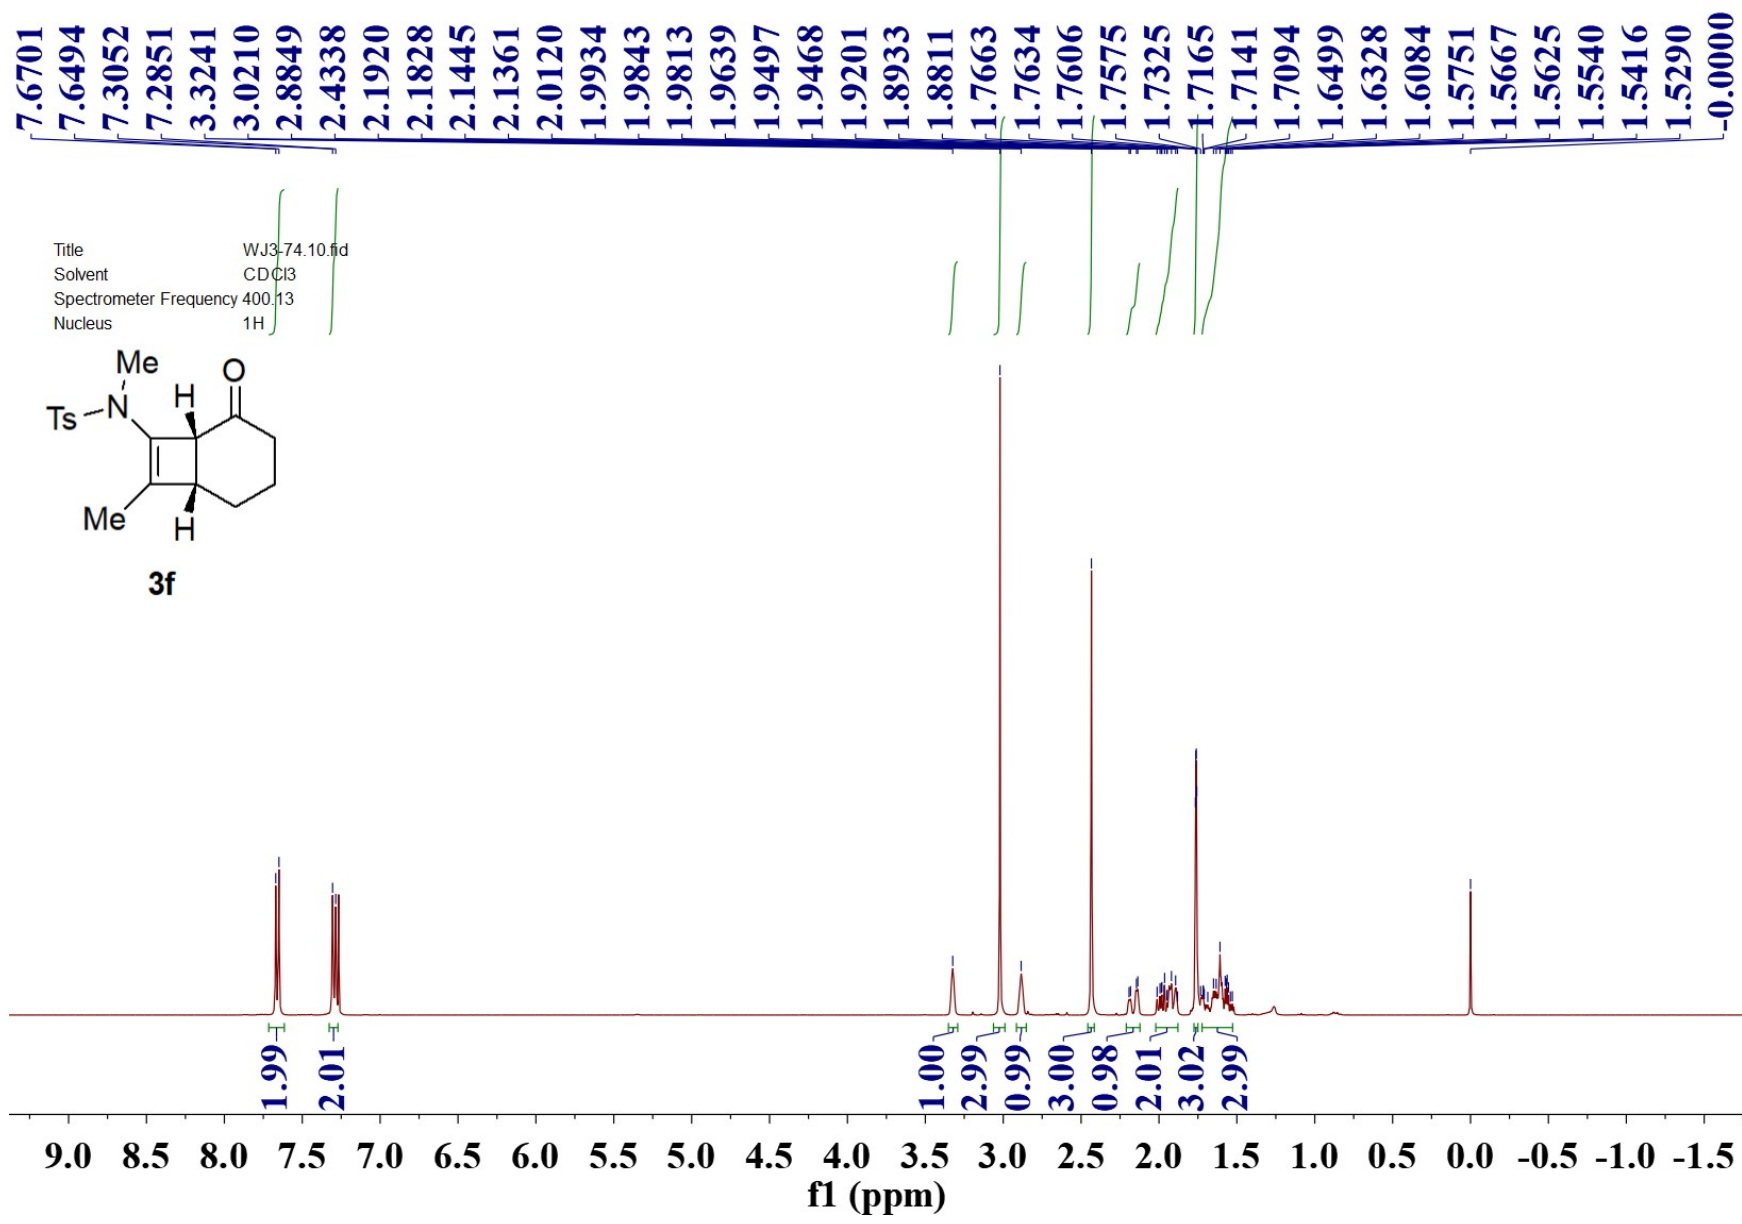

210.650

143.981  
139.623  
135.754  
129.746  
128.209  
127.599

77.517  
77.200  
76.883

53.758  
40.234  
38.653  
35.466  
23.969  
21.770  
17.440  
12.695

Title WJ3-74.10.fid  
Solvent CDCl3  
Spectrometer Frequency 100.62  
Nucleus 13C

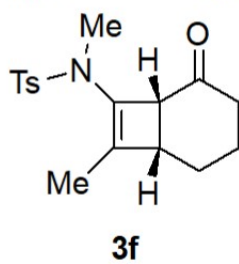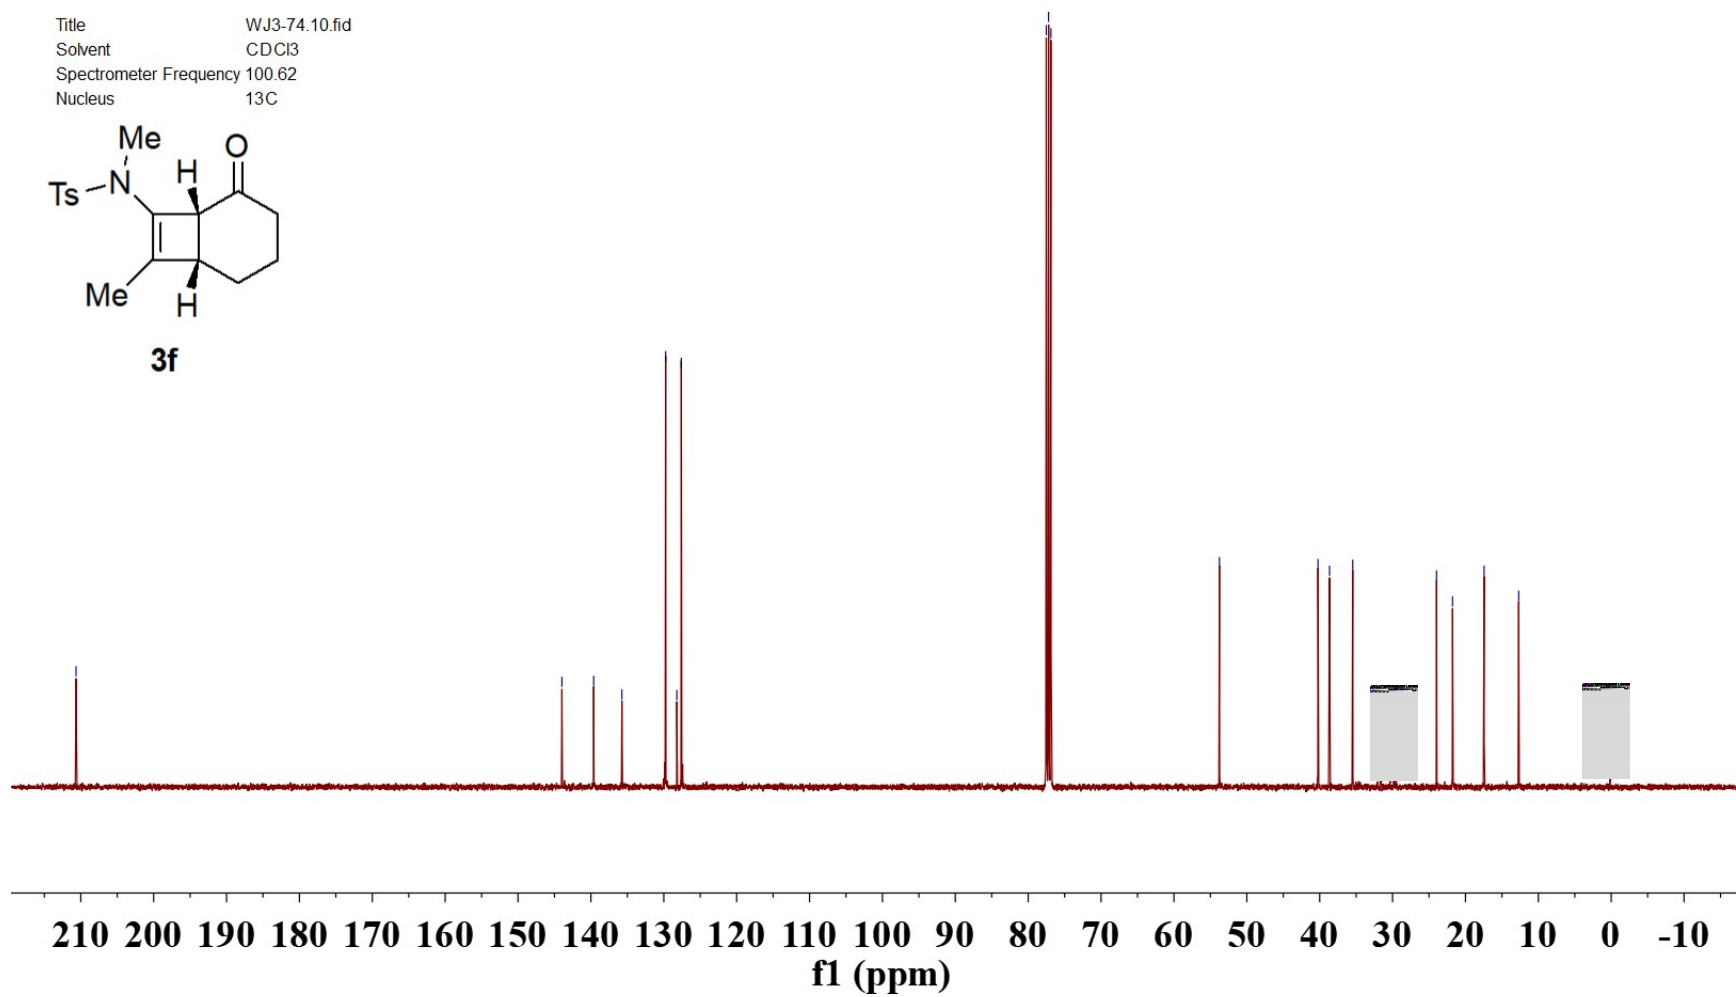

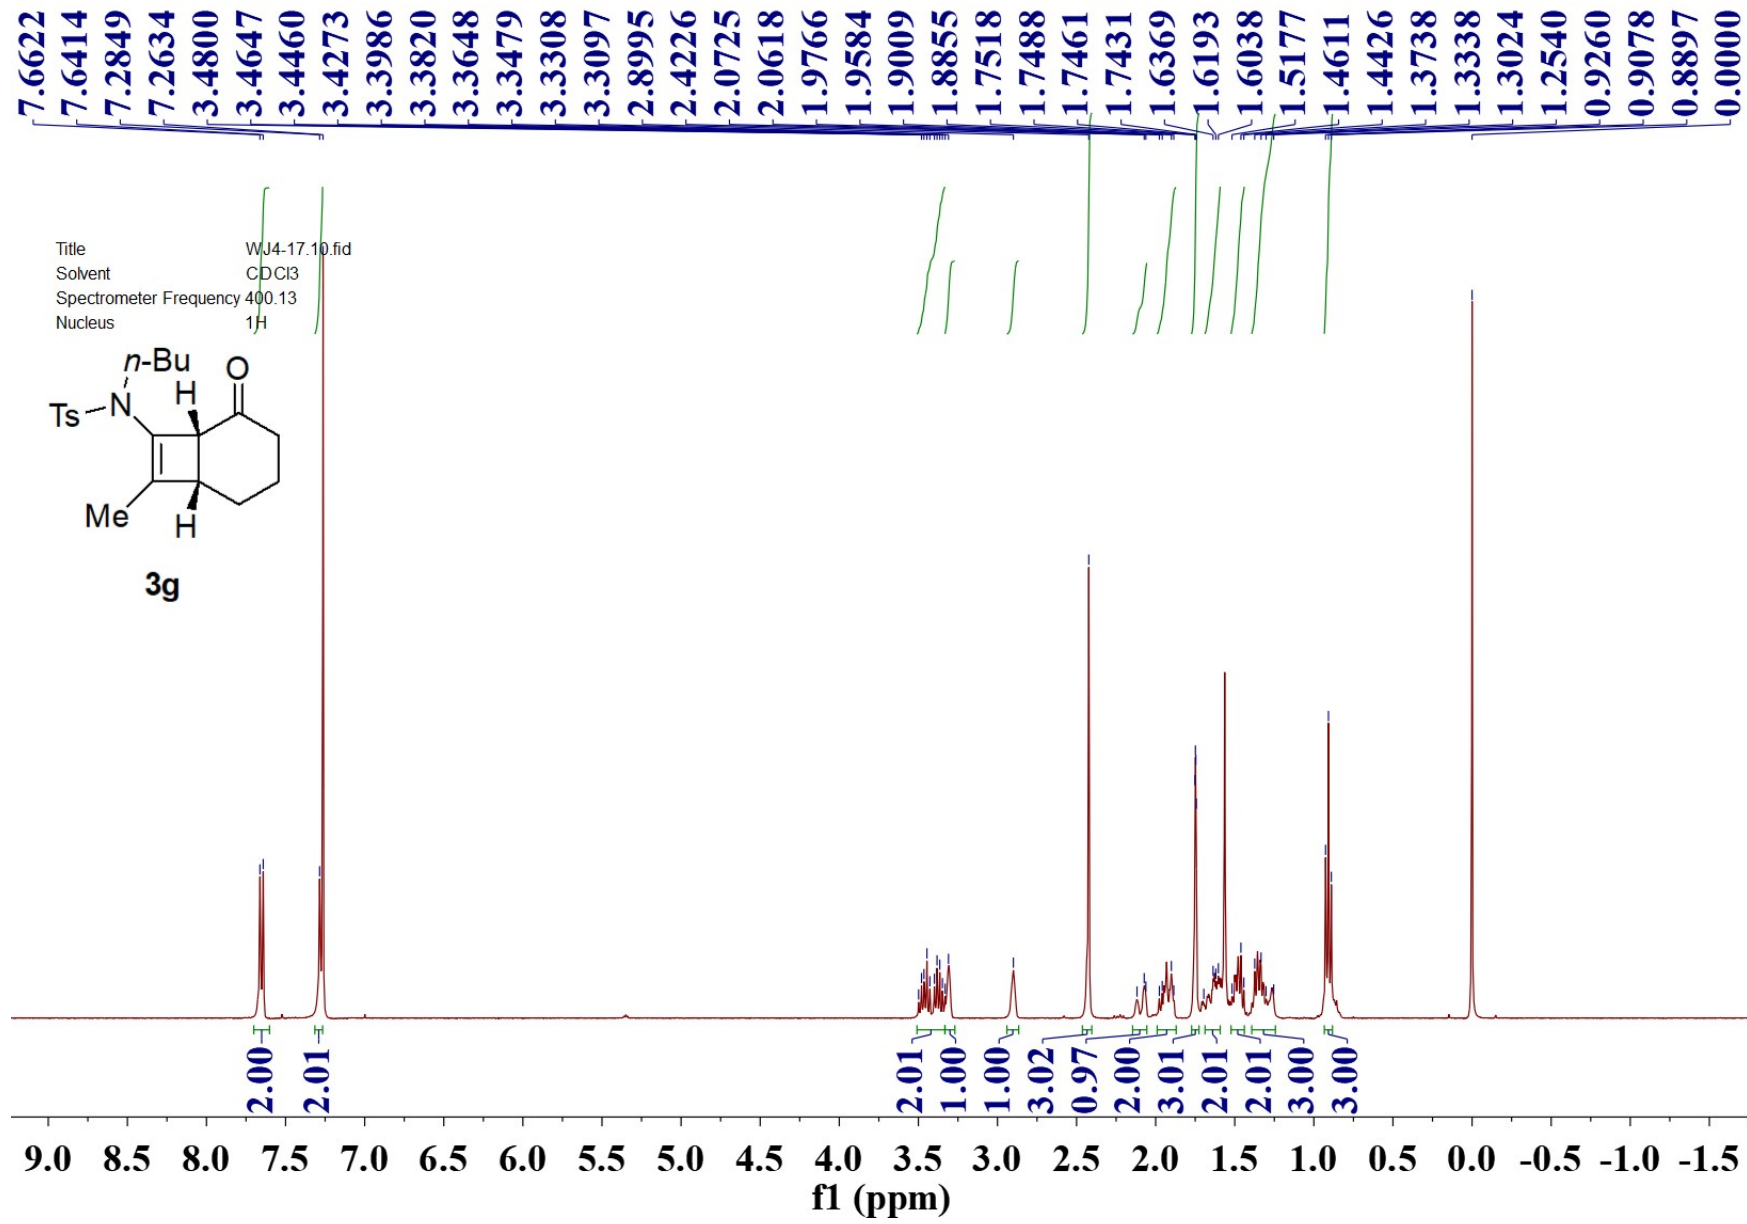

210.359

143.715  
143.453  
137.083  
129.673  
127.538  
126.979

77.517  
77.200  
76.882  
53.821  
47.574  
40.483  
38.618  
31.484  
23.983  
21.754  
19.634  
17.403  
13.925  
12.608

Title WJ5-19.10.fid  
Solvent CDCl3  
Spectrometer Frequency 100.62  
Nucleus 13C

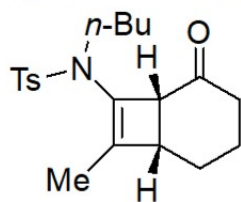

3g

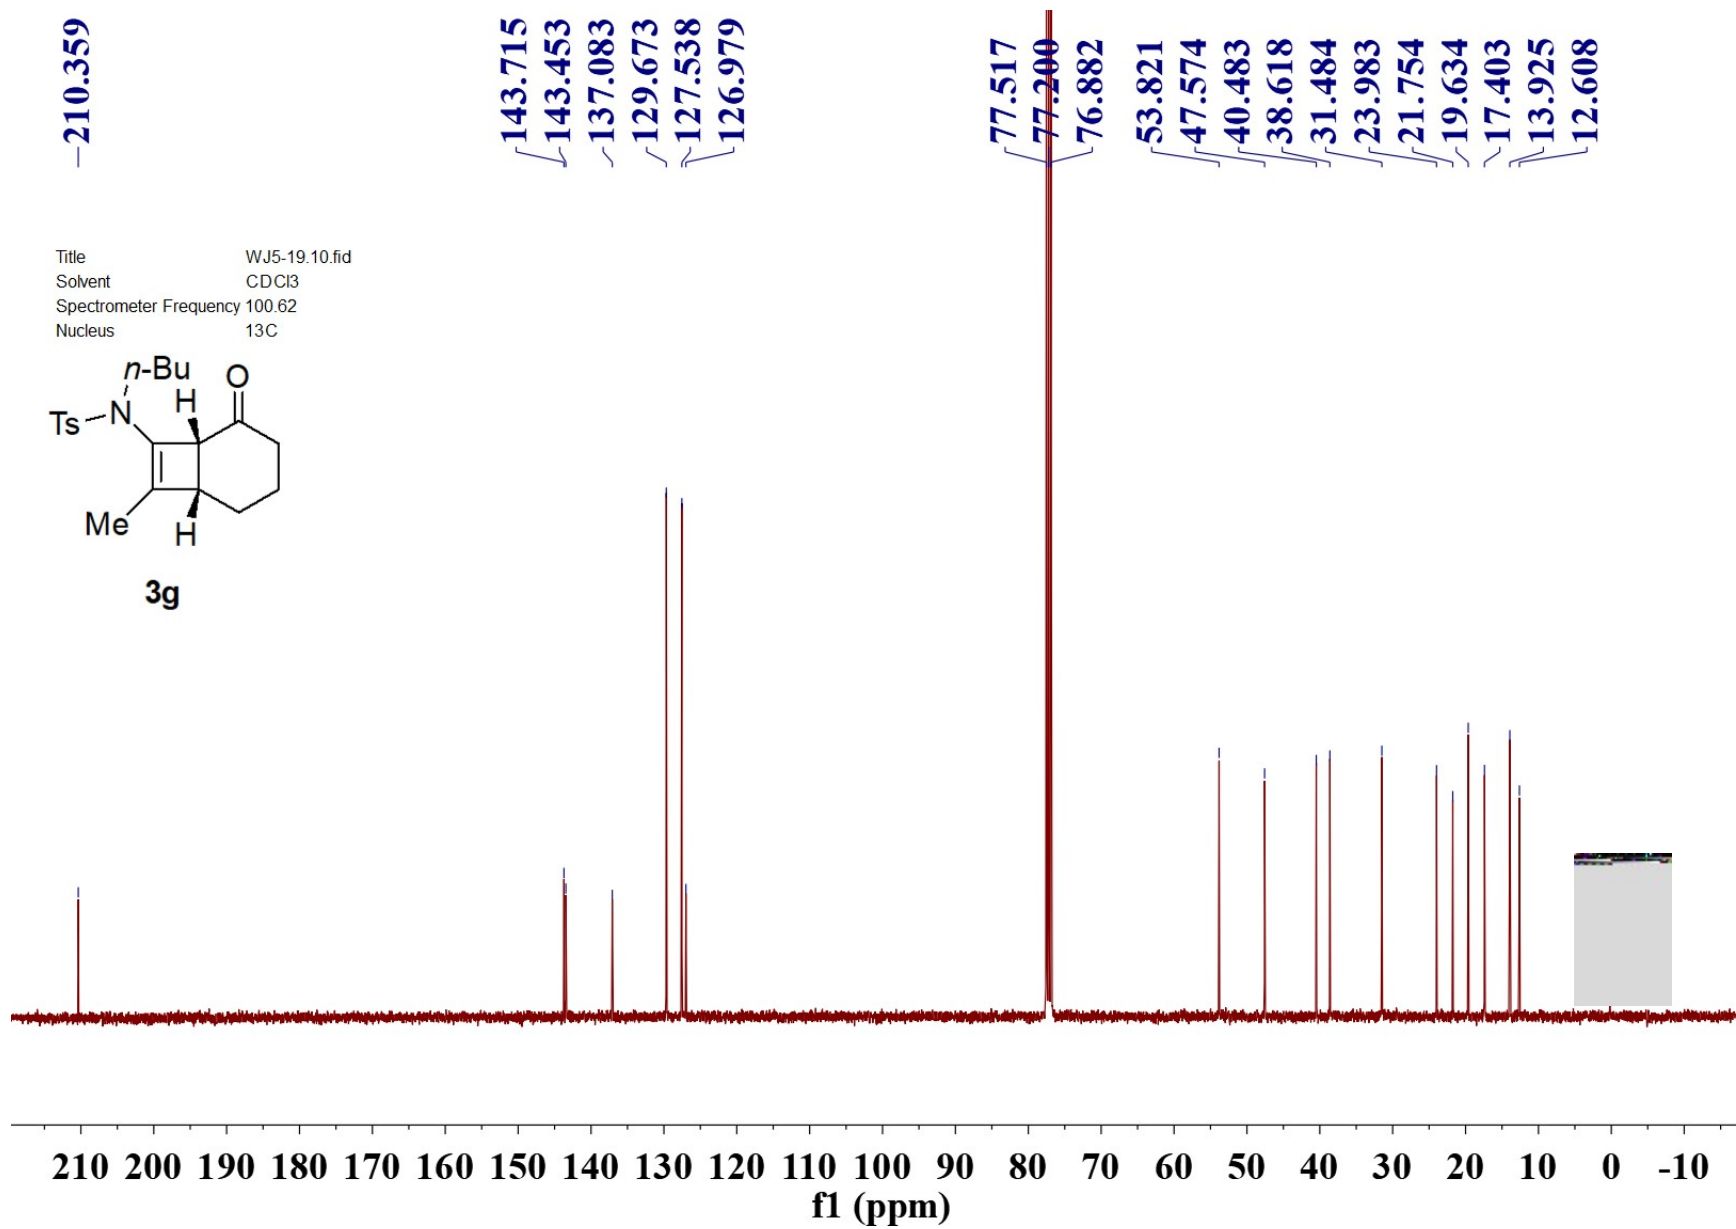

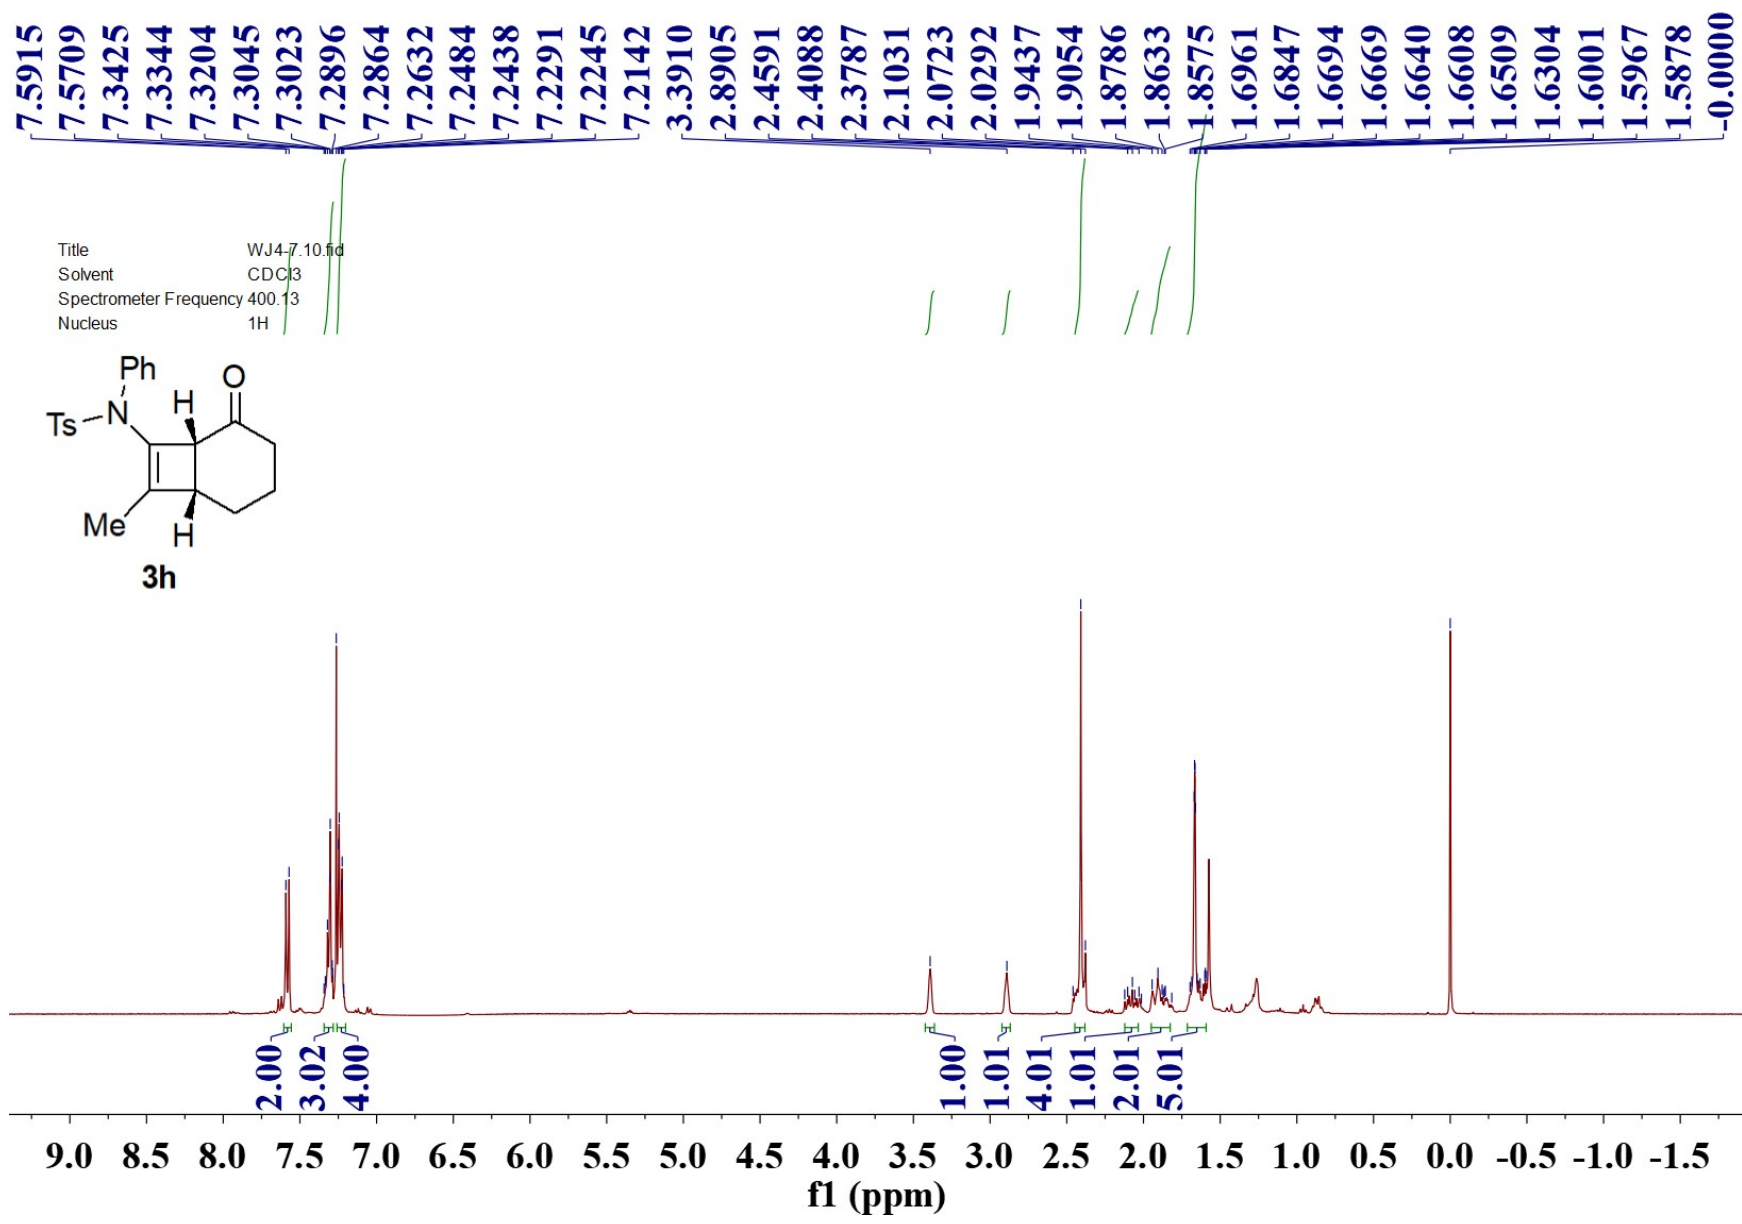

210.939

143.957  
142.875  
138.351  
136.780  
129.651  
129.541  
129.409  
129.022  
128.399  
128.146

77.519  
77.201  
76.884

55.542

40.060  
39.345

24.076  
21.779  
17.705  
12.195

Title WJ4-7-3.10.fid  
Solvent CDCl3  
Spectrometer Frequency 100.62  
Nucleus 13C

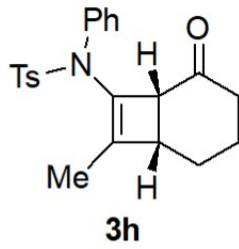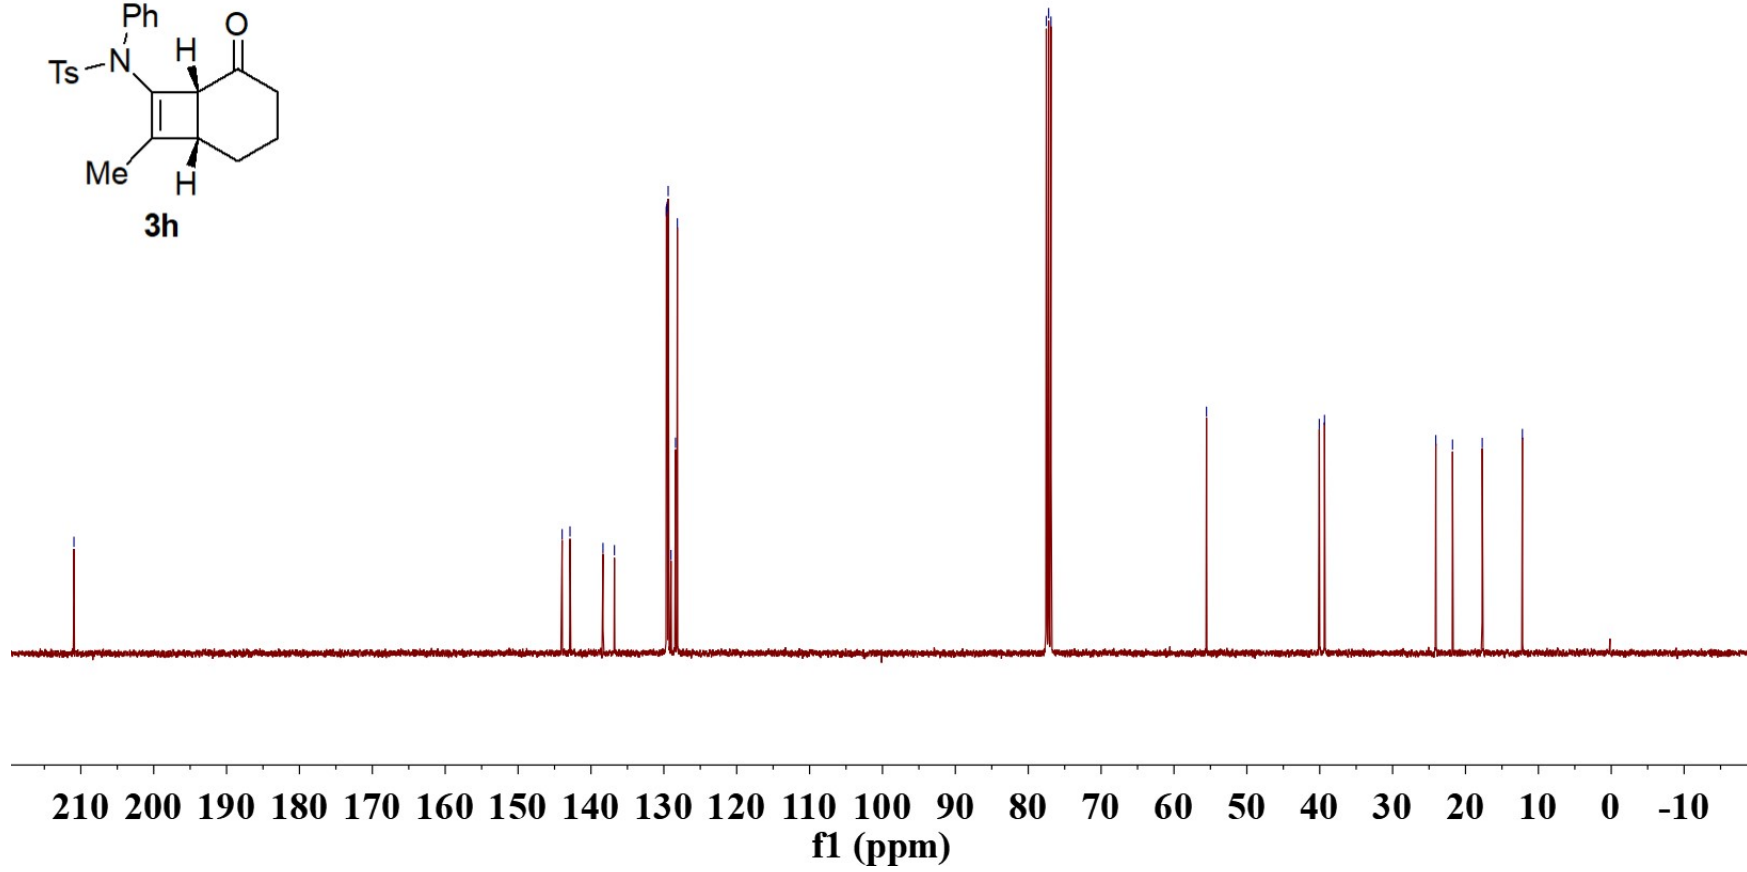



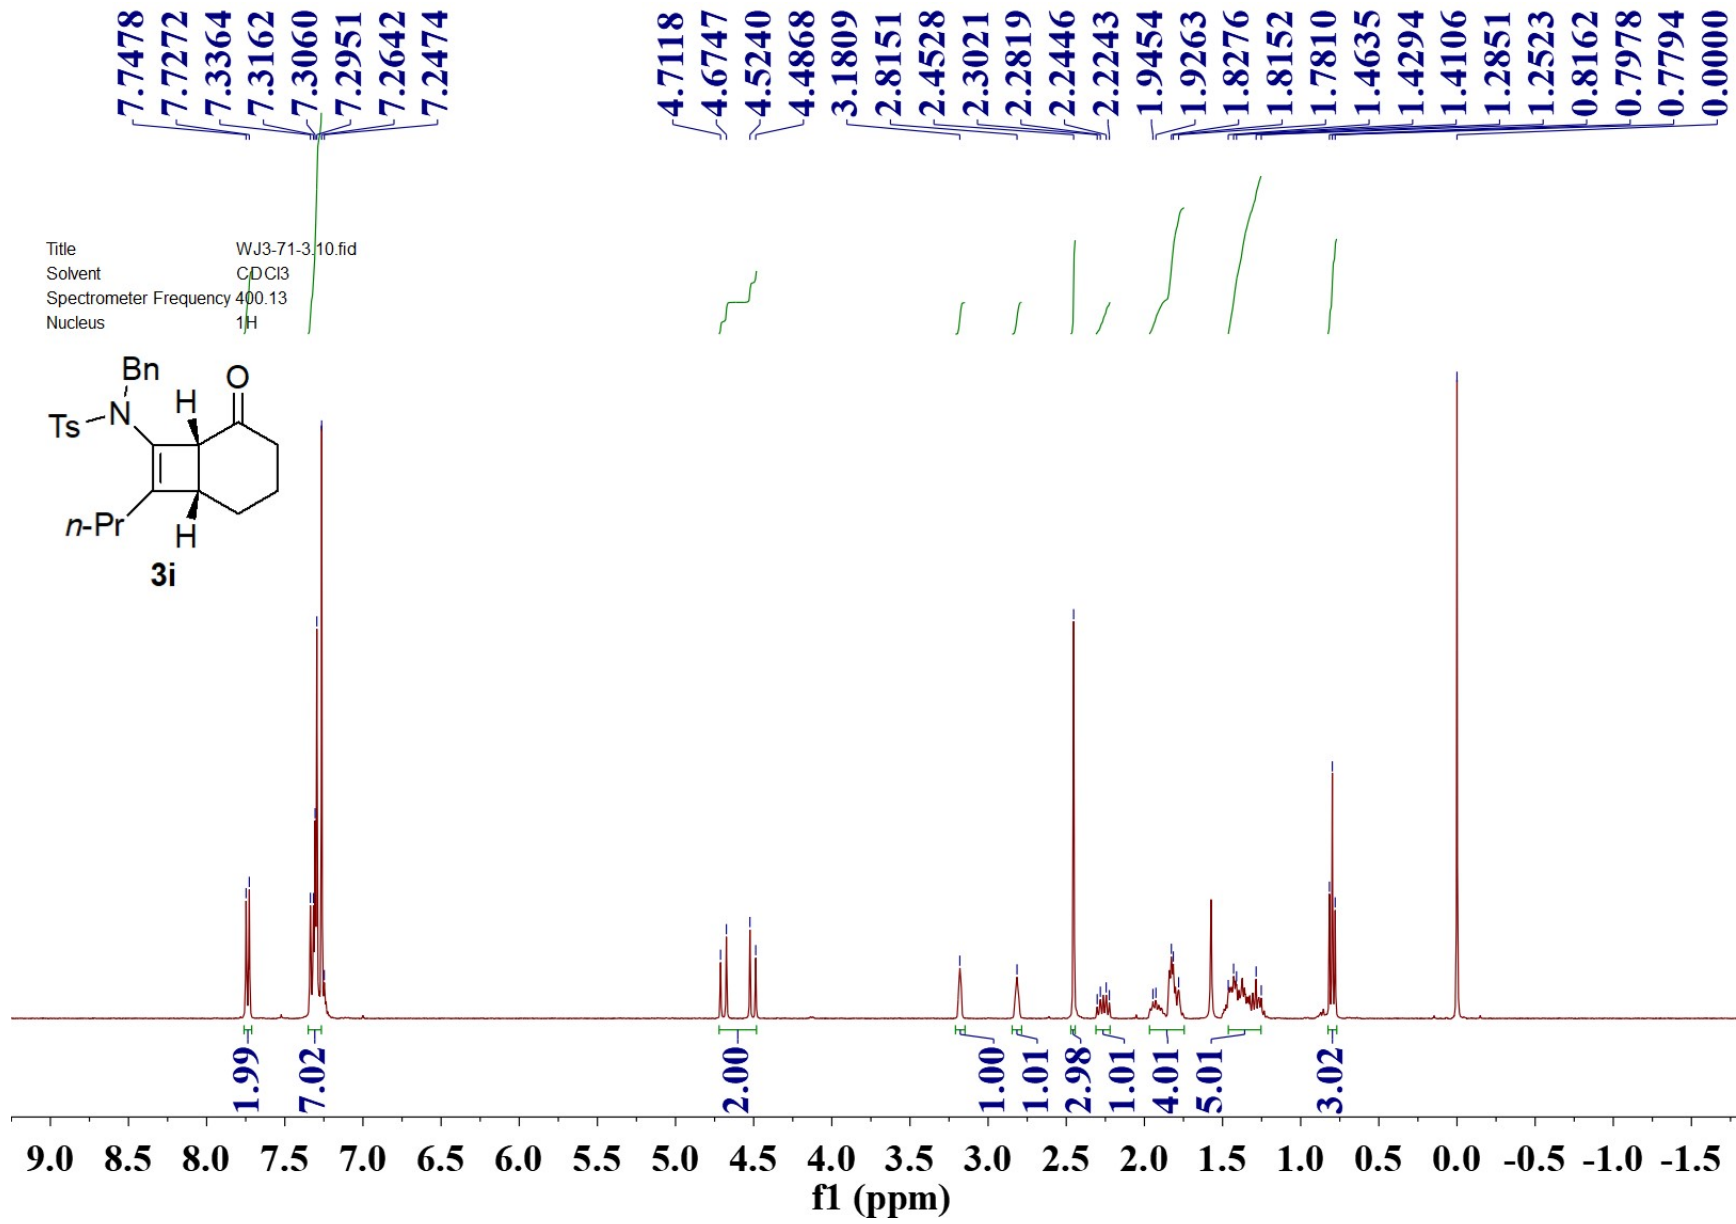

210.669

148.432  
143.996  
136.765  
136.436  
129.827  
128.600  
128.121  
127.776  
127.705  
126.272

77.517  
77.200  
76.883

53.552  
51.477  
40.602  
37.039  
29.092  
24.346  
21.810  
19.752  
17.338  
14.404

Title WJ3-71.10.fid  
Solvent CDCl3  
Spectrometer Frequency 100.62  
Nucleus 13C

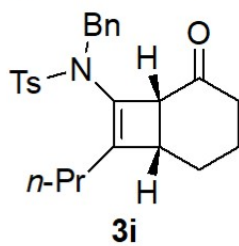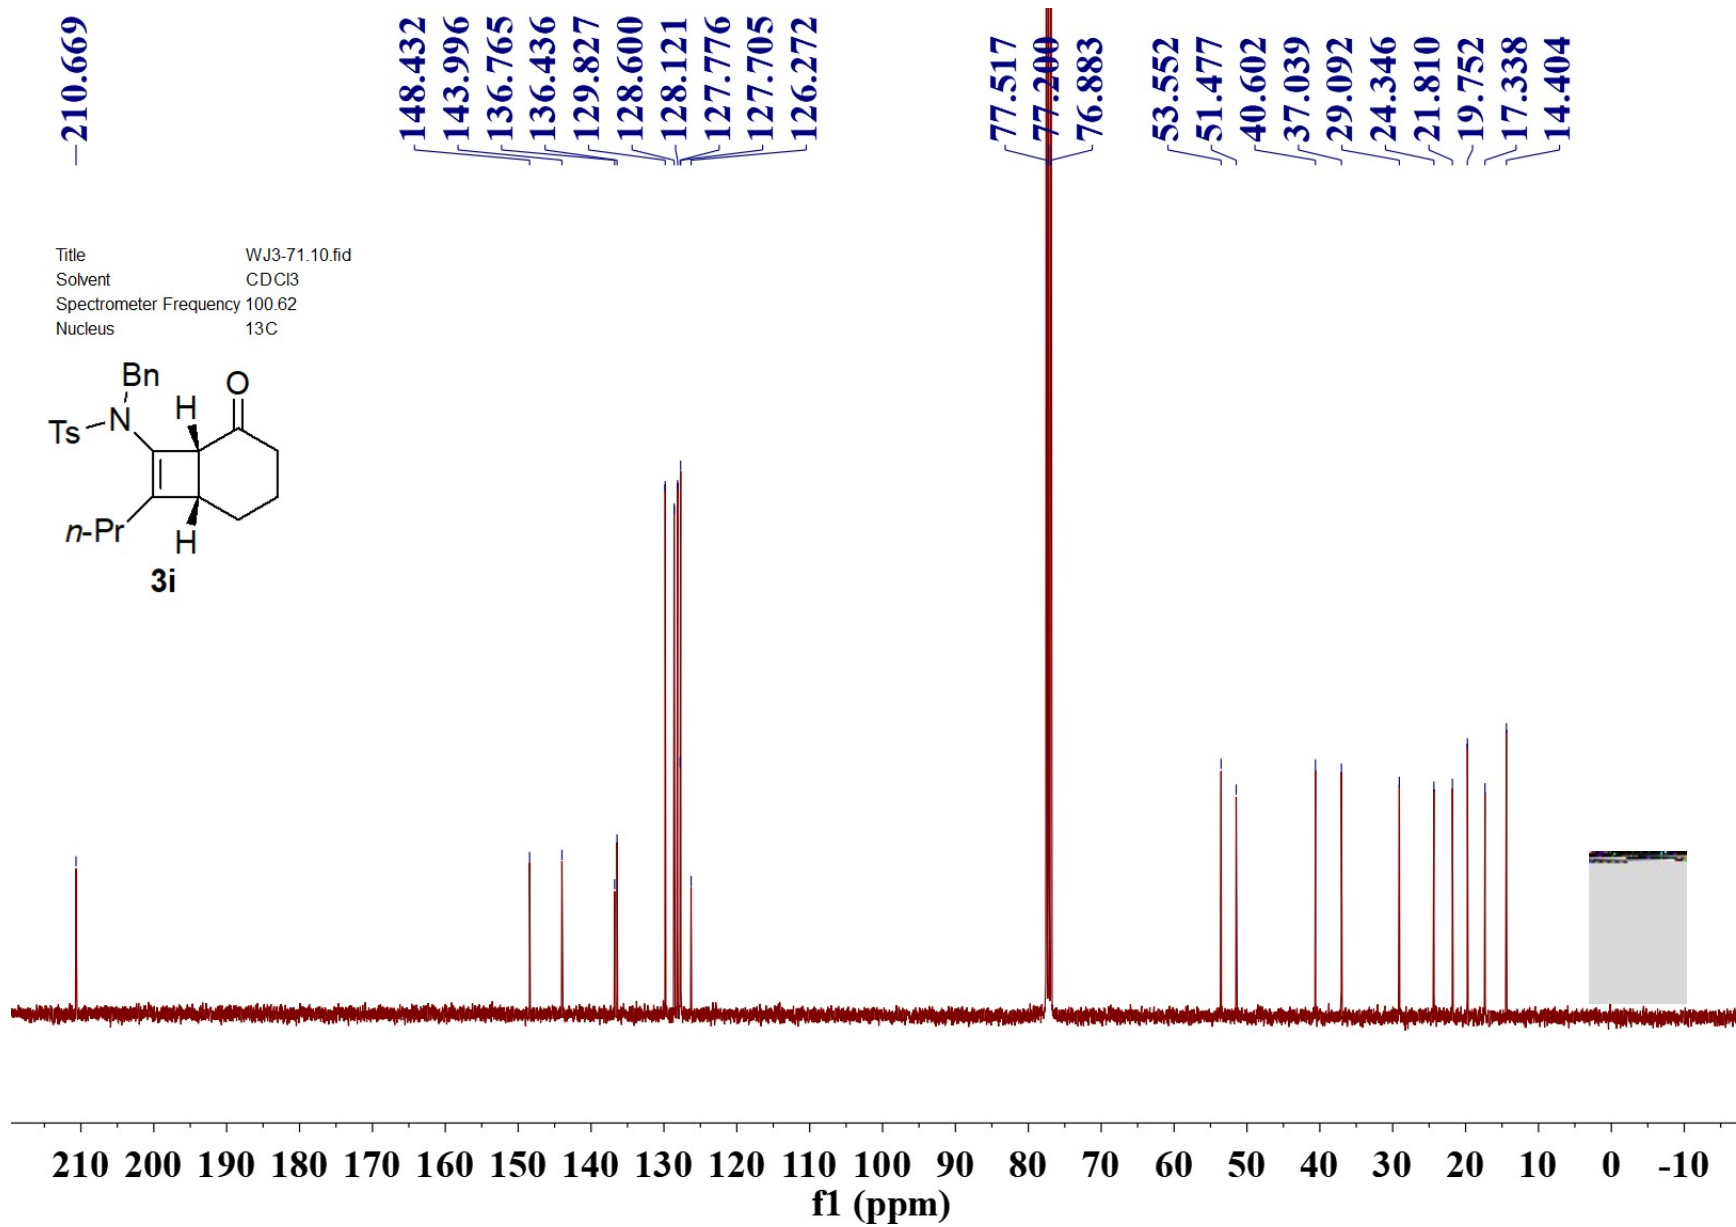

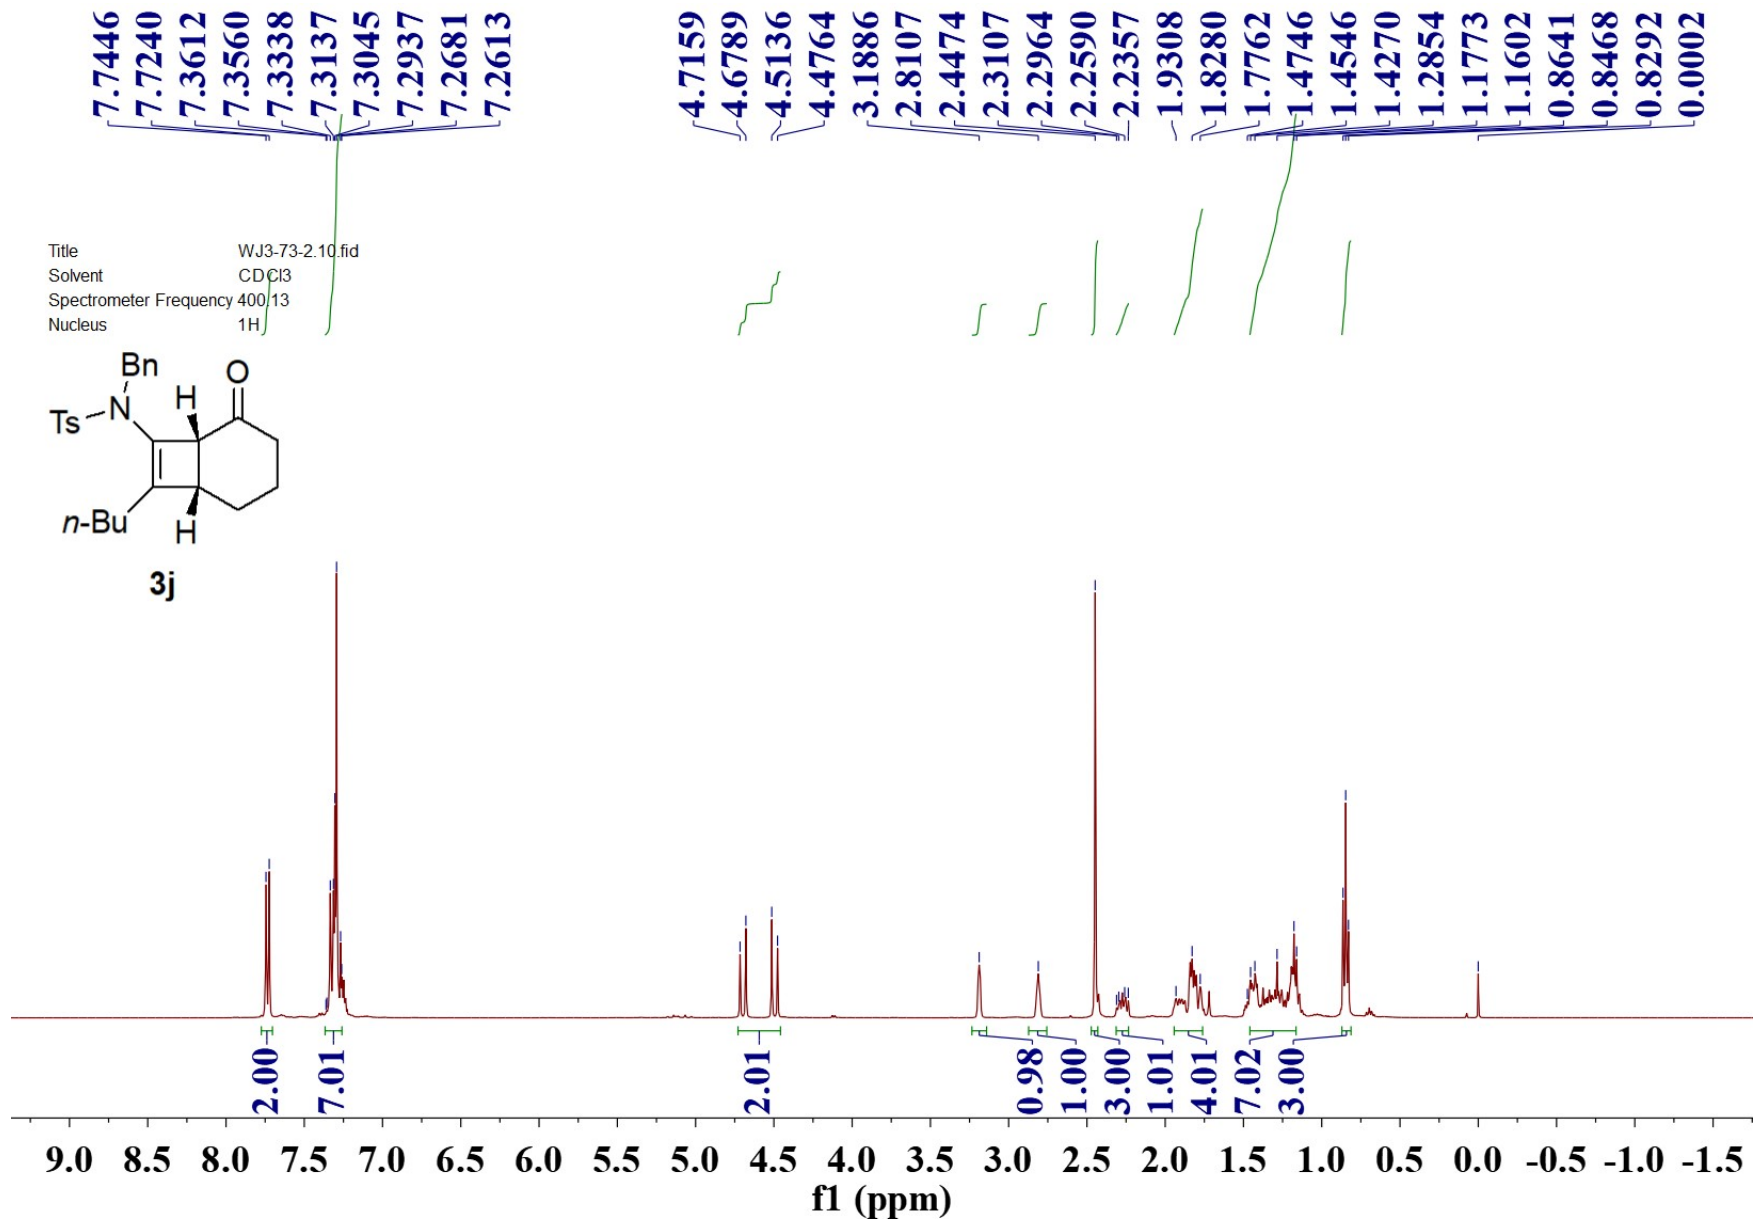

210.643

148.555  
143.969  
136.745  
136.439  
129.808  
128.577  
128.126  
127.764  
127.683  
126.095

77.517  
77.200  
76.882  
53.553  
51.477  
40.576  
37.000  
28.478  
26.763  
24.299  
22.907  
21.789  
17.318  
14.054

Title WJ3-73.10.fid  
Solvent CDCl3  
Spectrometer Frequency 100.62  
Nucleus 13C

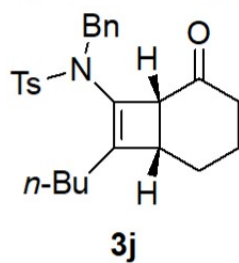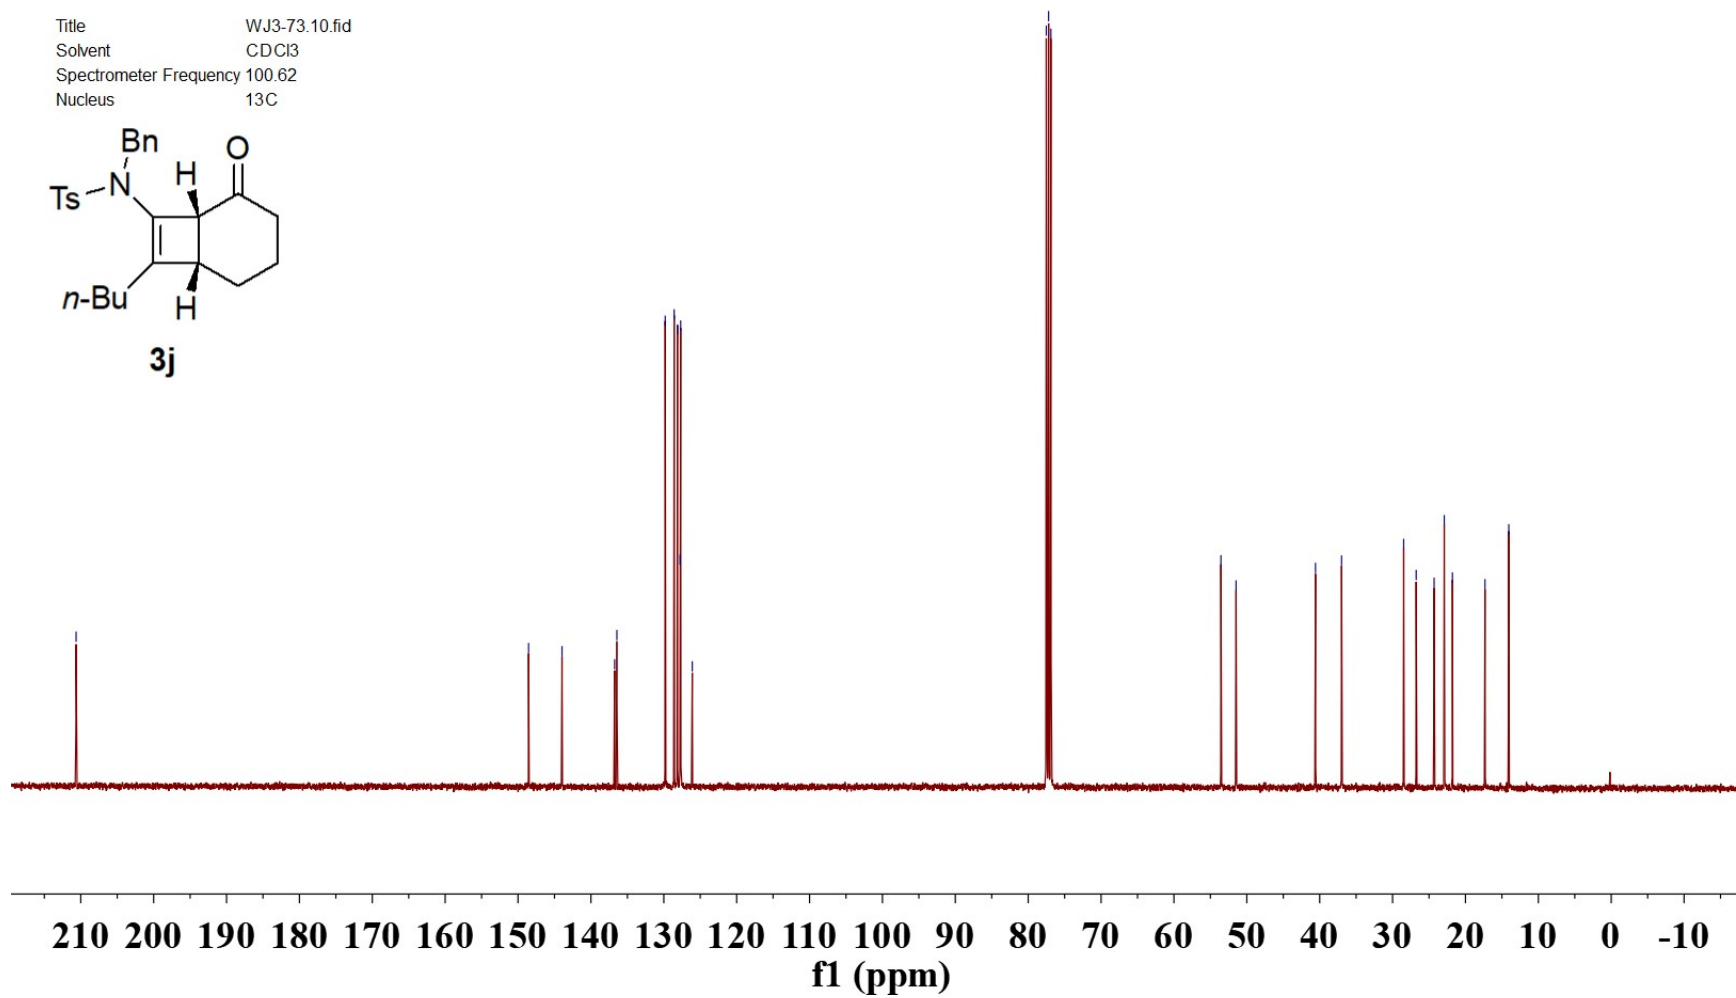

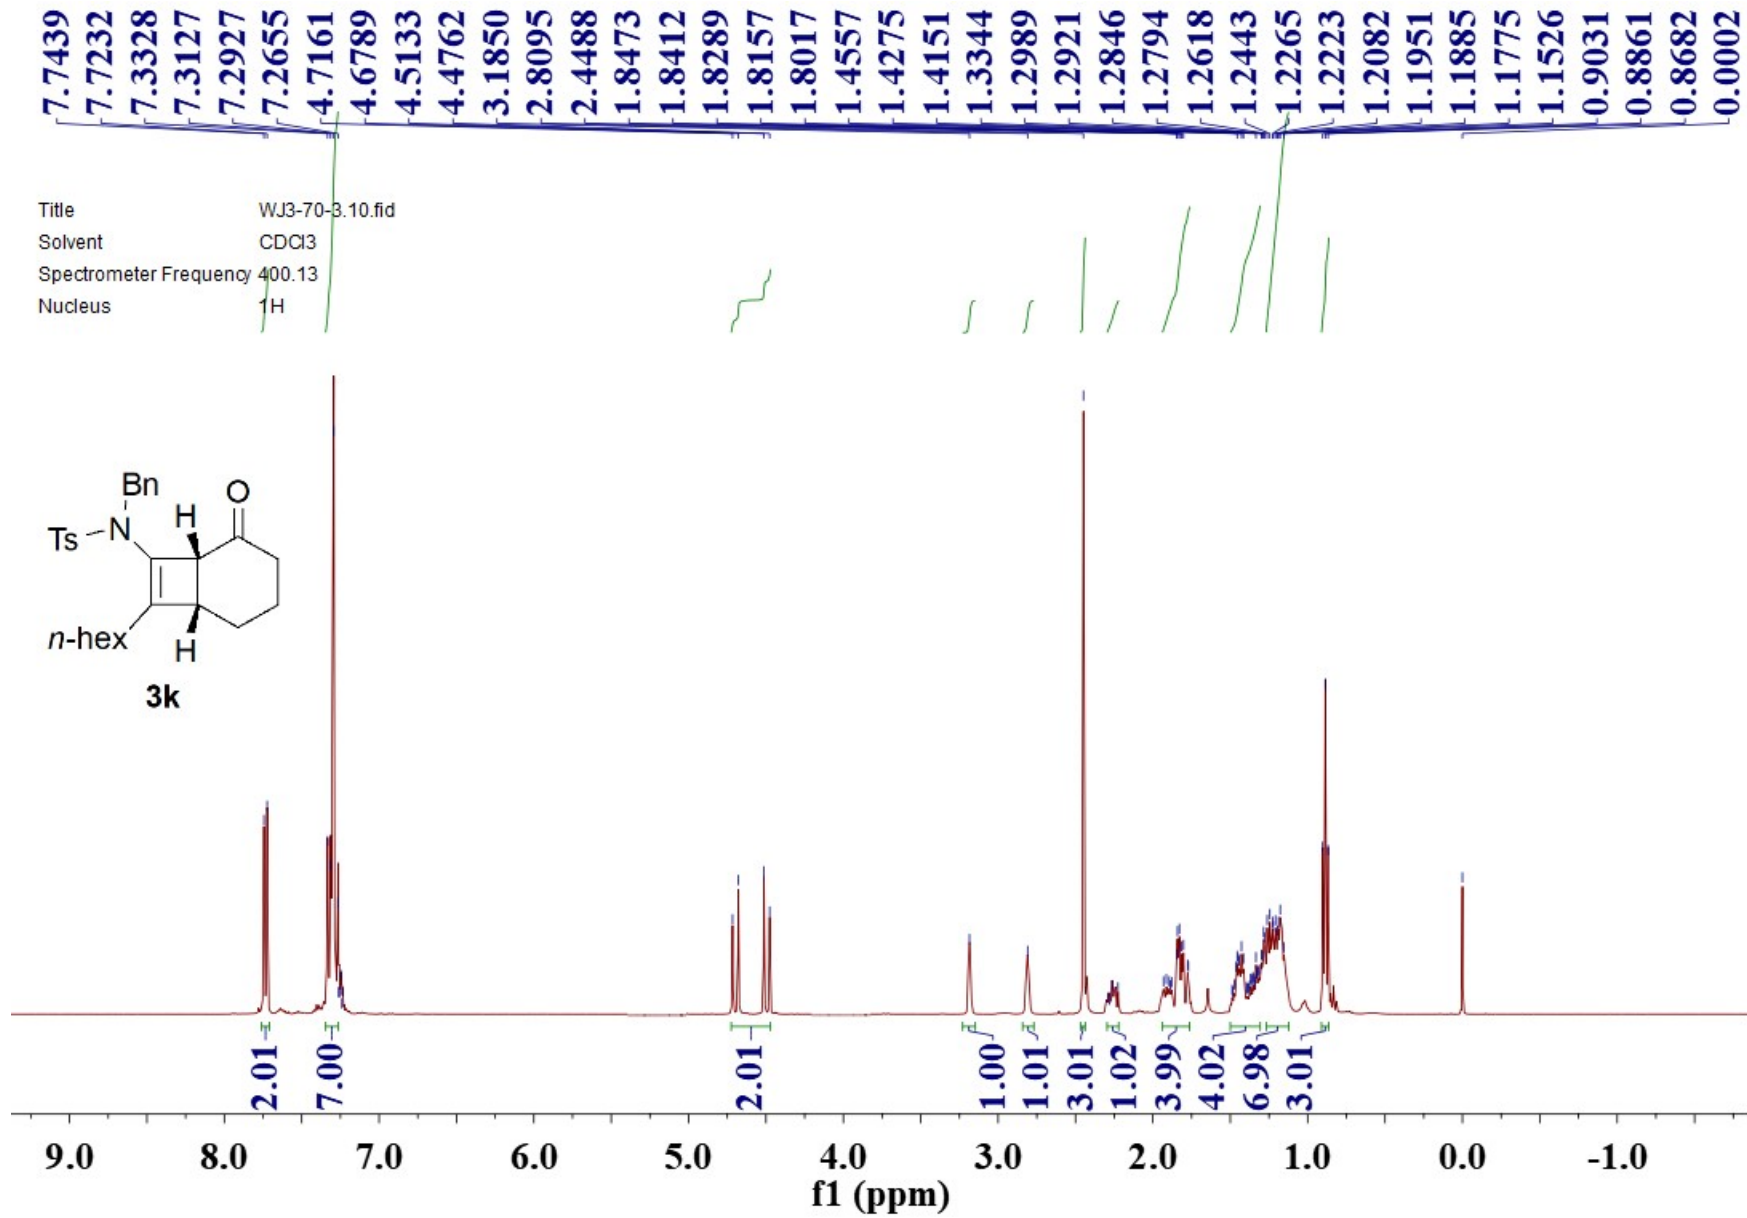

210.663

148.570  
143.966  
136.759  
136.449  
129.815  
128.593  
128.107  
127.778  
127.694  
126.078

77.517  
77.200  
76.883  
53.563  
51.487  
40.582  
37.001  
31.821  
29.580  
27.111  
26.353  
24.328  
22.764  
21.803  
17.334  
14.304

Title WJ3-70.10.fid  
Solvent CDCl3  
Spectrometer Frequency 100.62  
Nucleus 13C

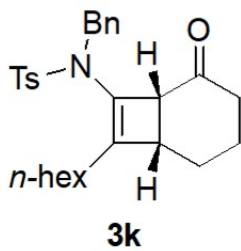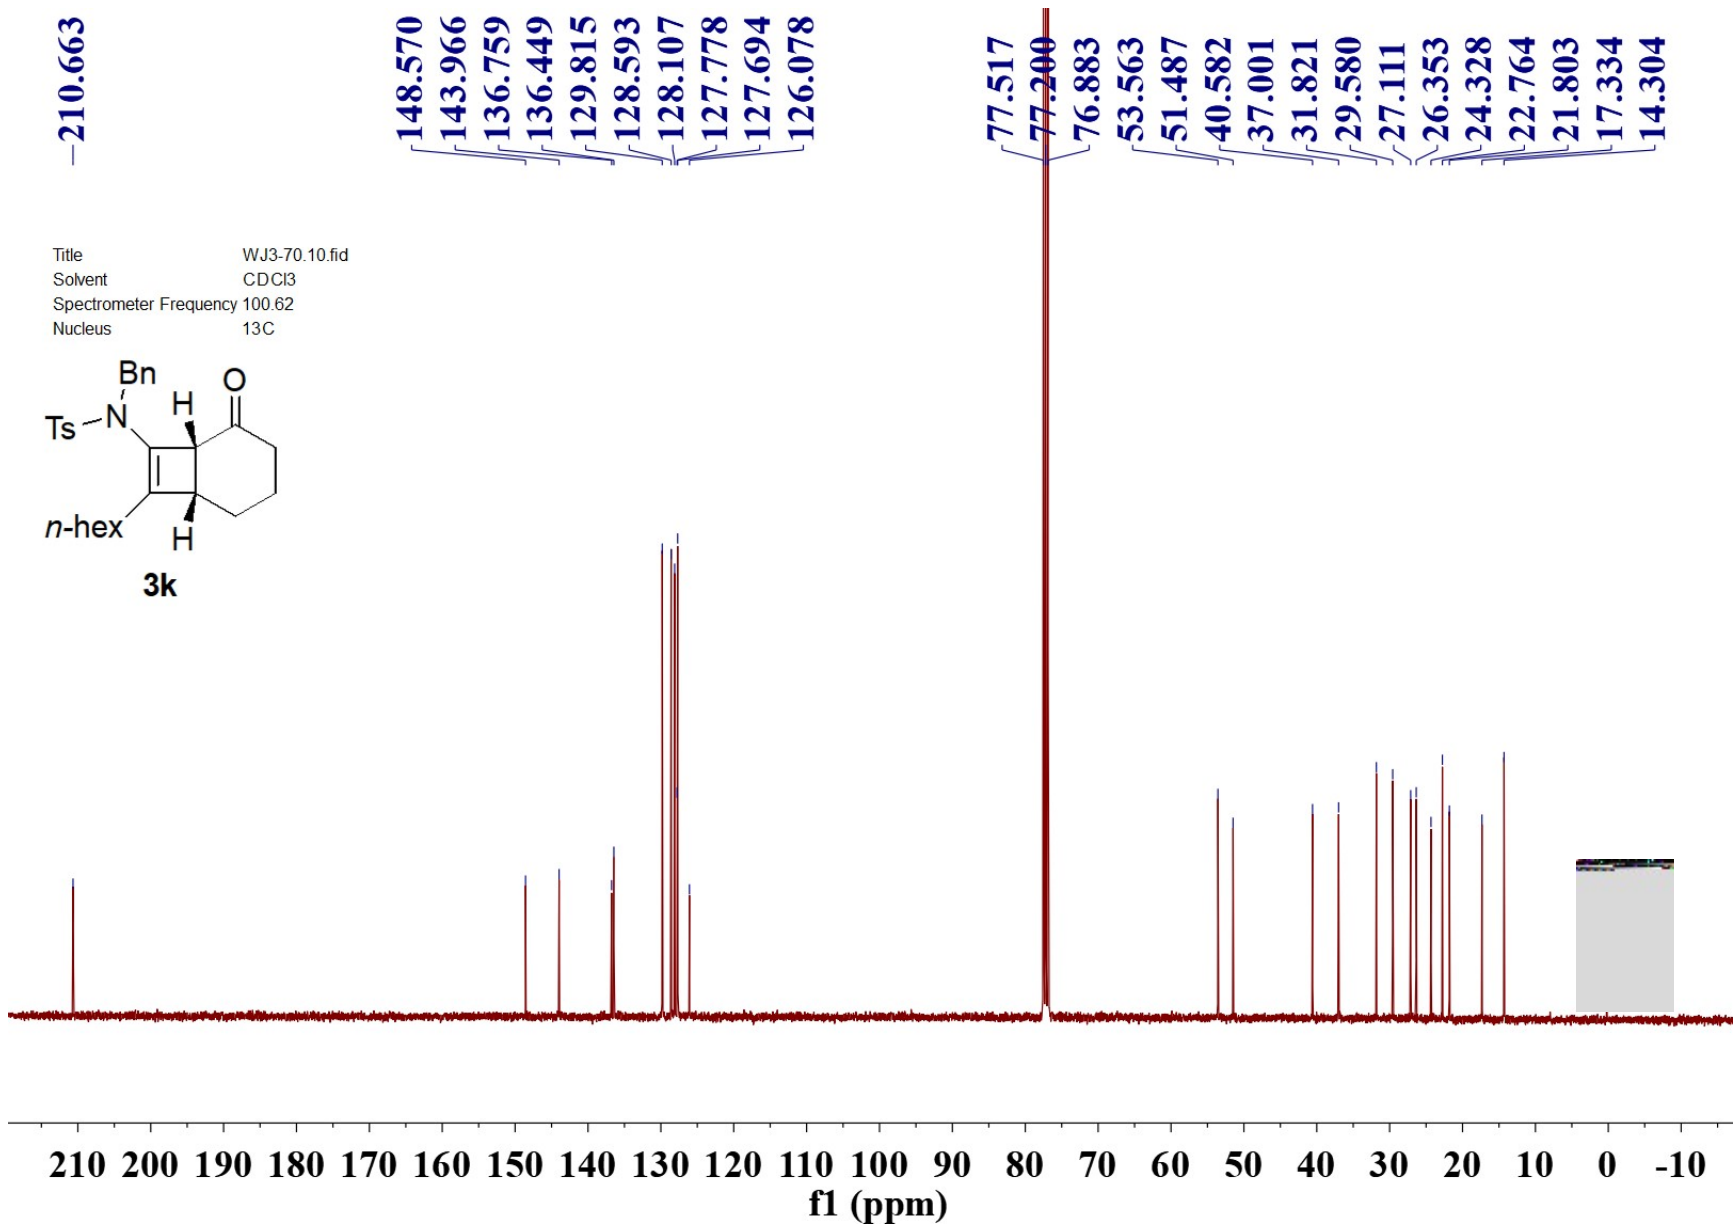



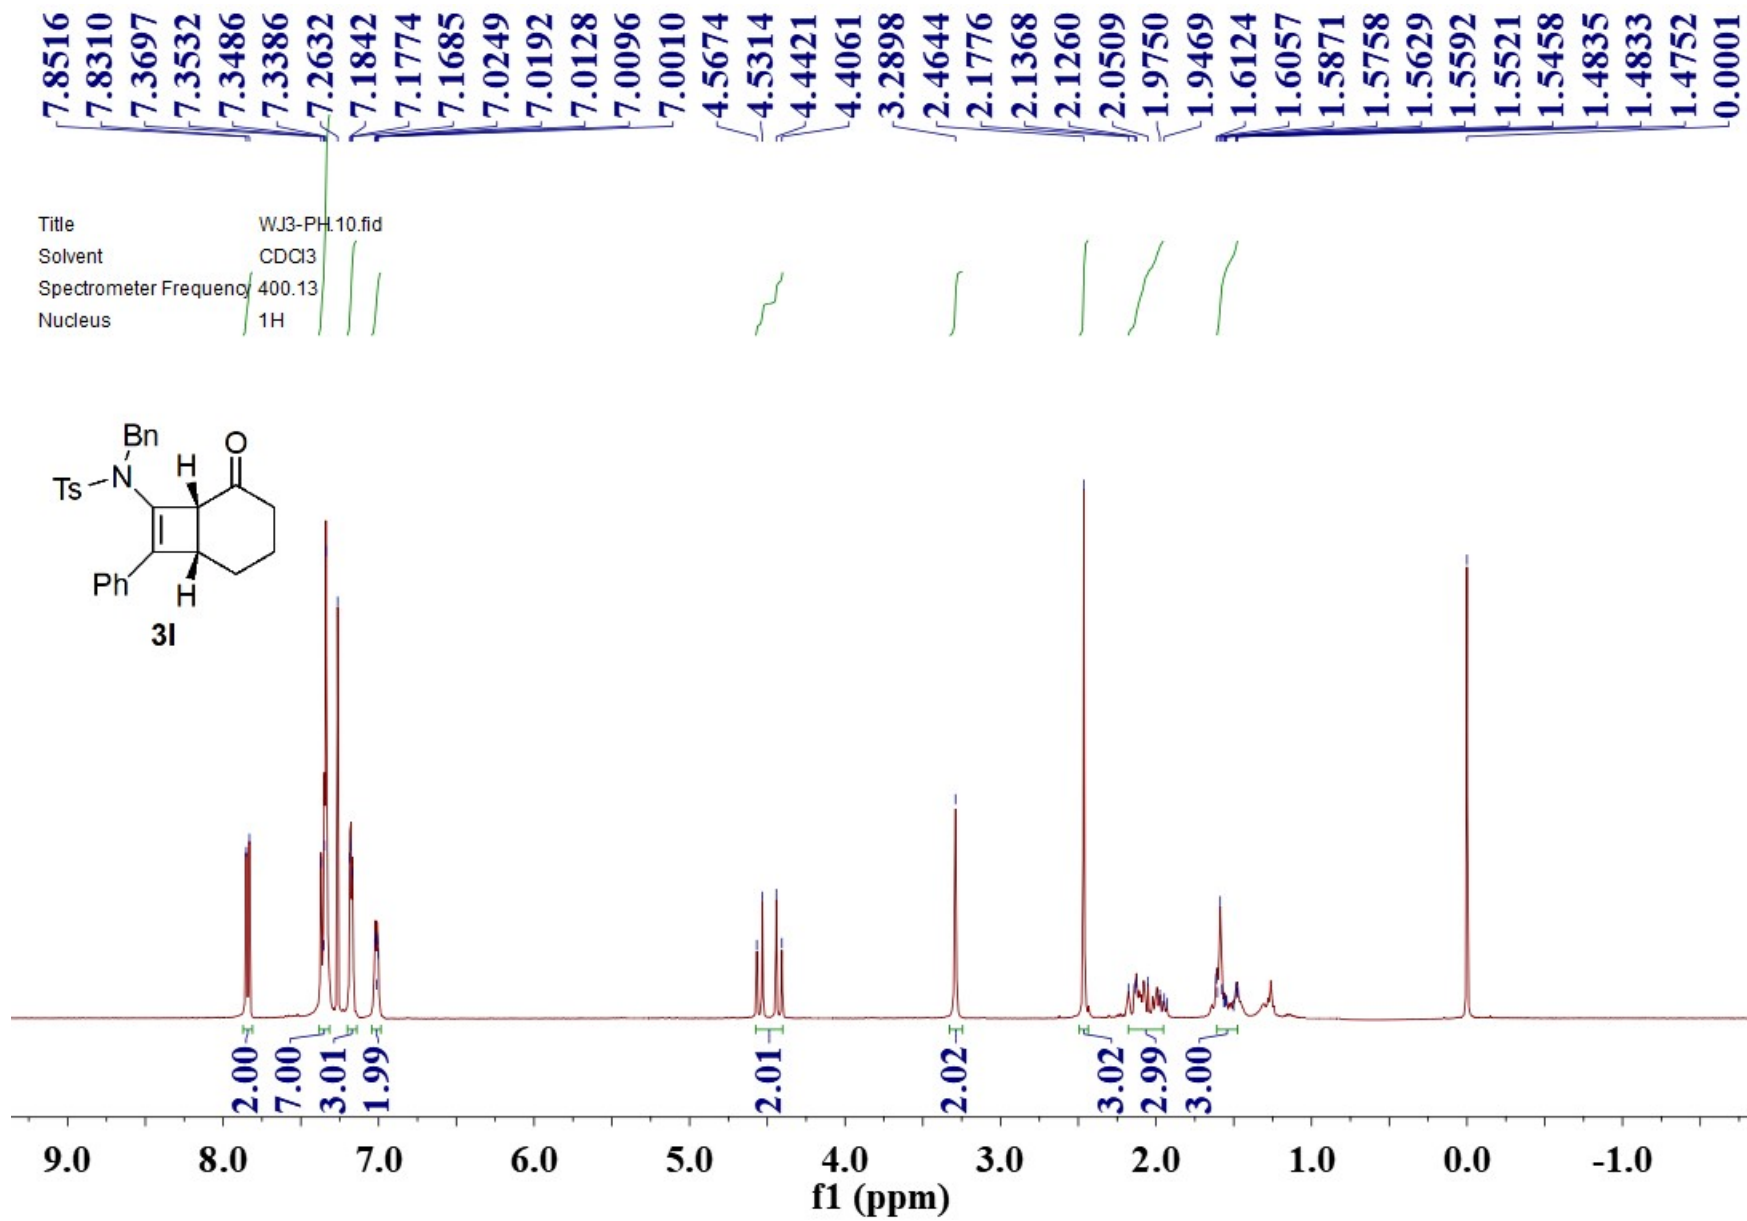

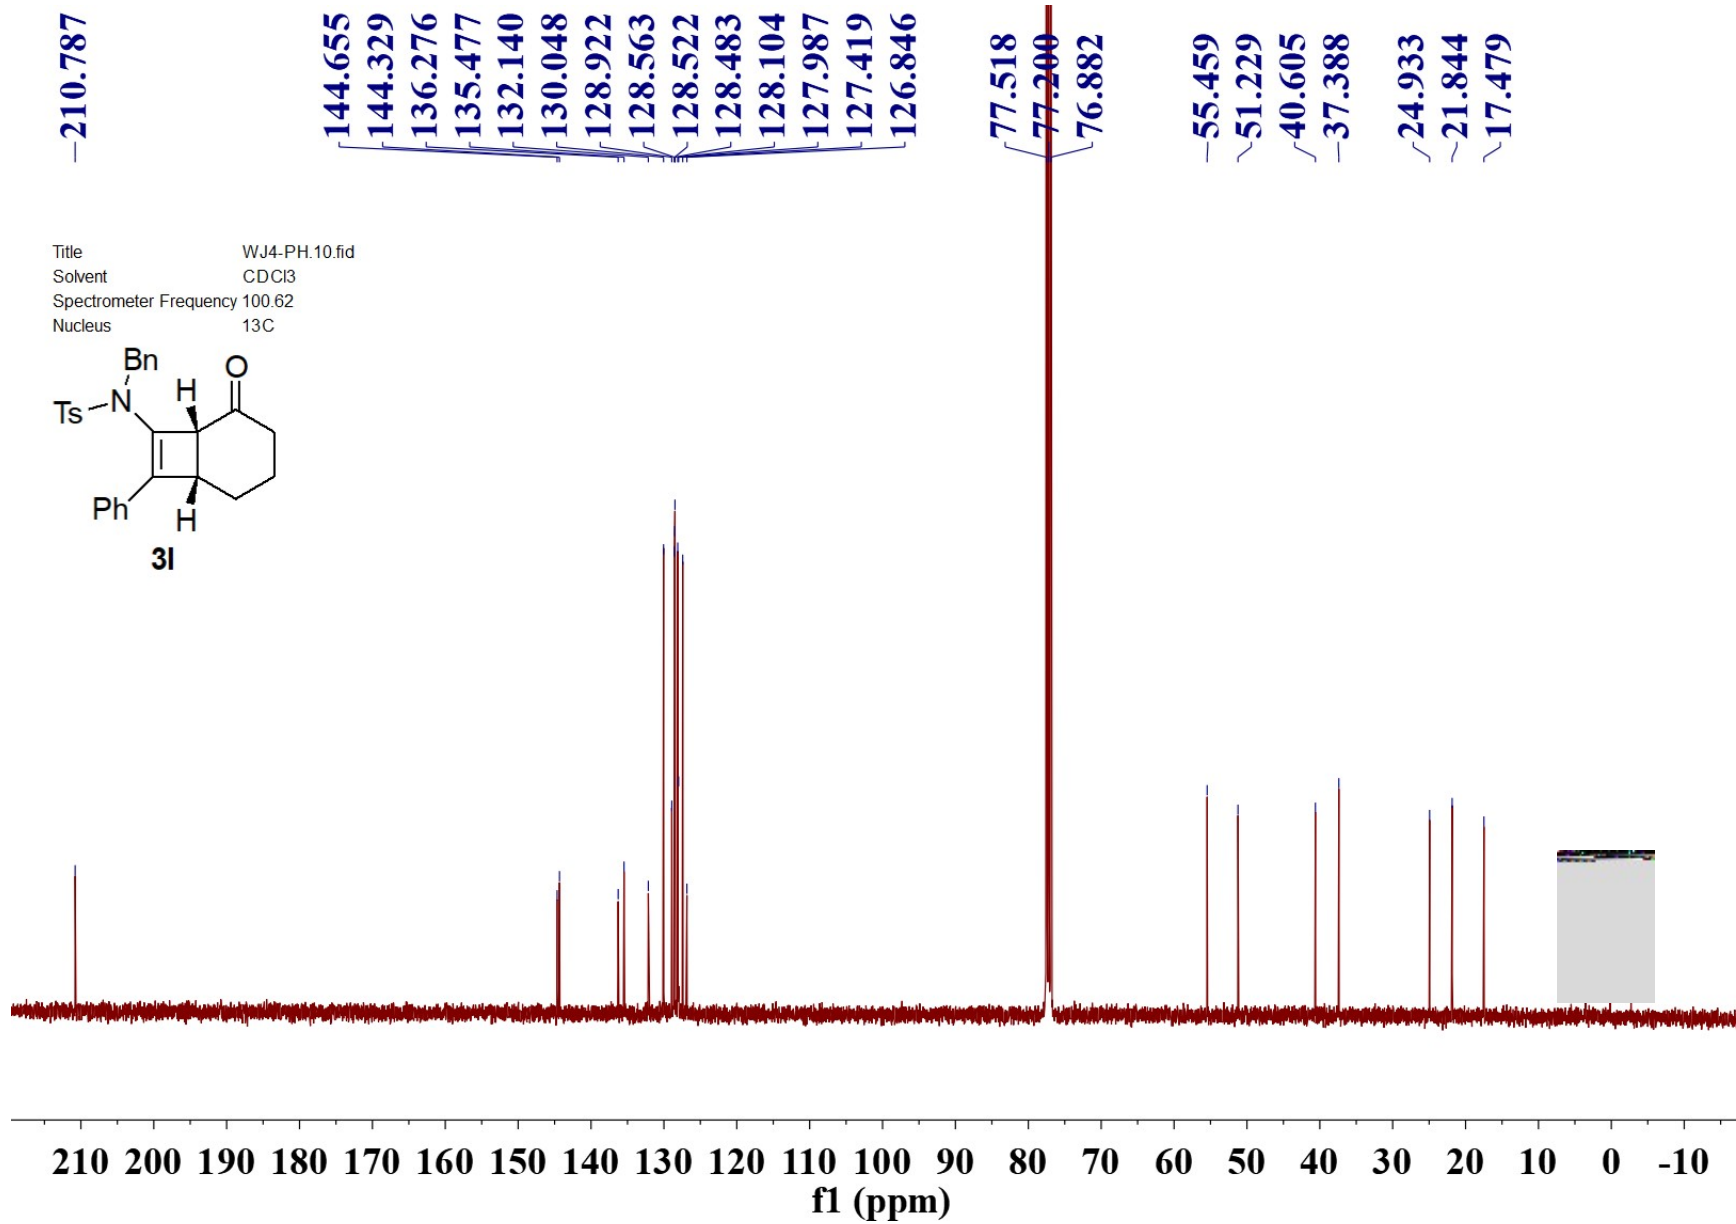

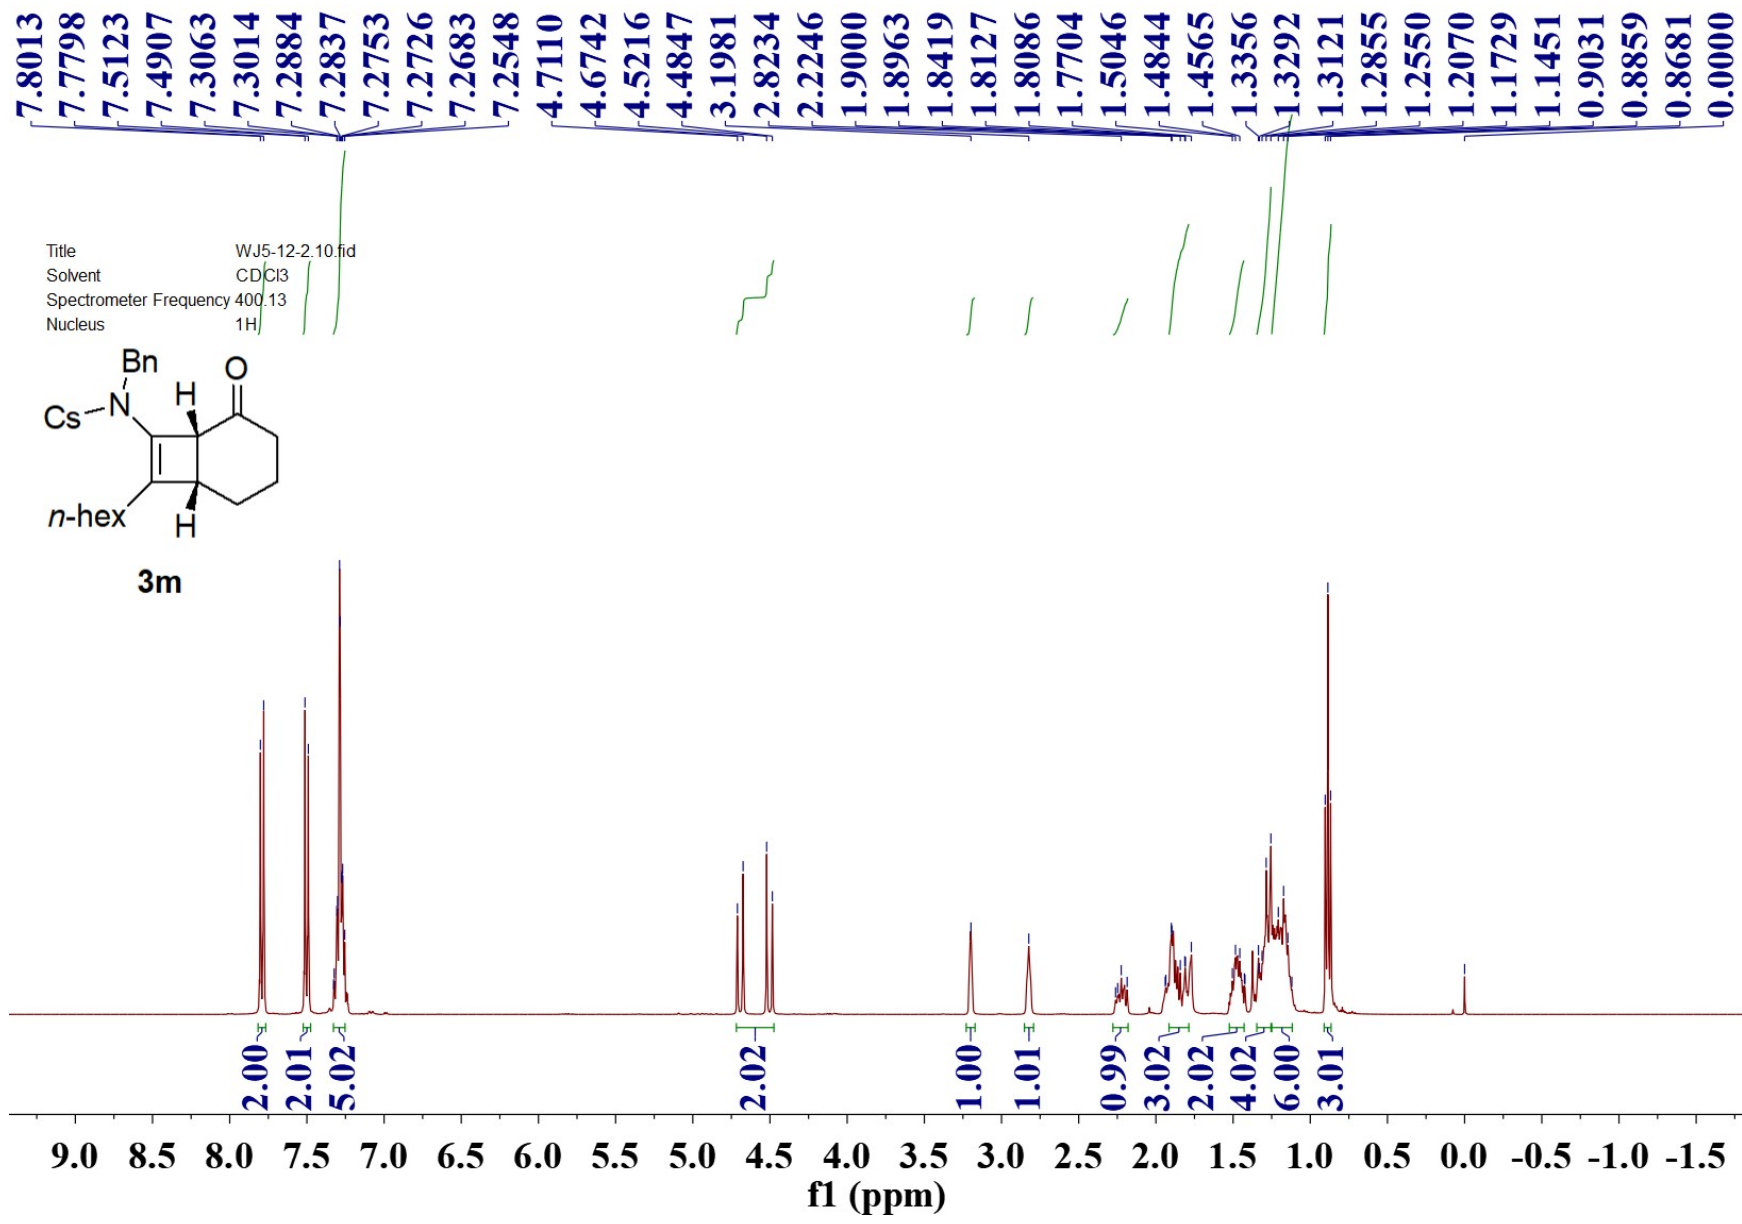

-210.327

149.284  
139.662  
138.224  
136.034  
129.480  
129.114  
128.656  
128.132  
127.946  
125.653

77.518  
77.200  
76.882  
53.345  
51.675  
40.772  
37.039  
31.782  
29.543  
27.094  
26.337  
24.310  
22.733  
17.366  
14.277

Title WJ5-12-2.10.fid  
Solvent CDCl3  
Spectrometer Frequency 100.62  
Nucleus 13C

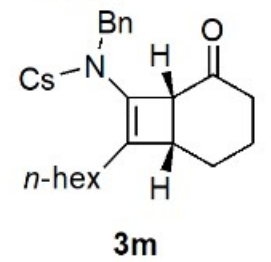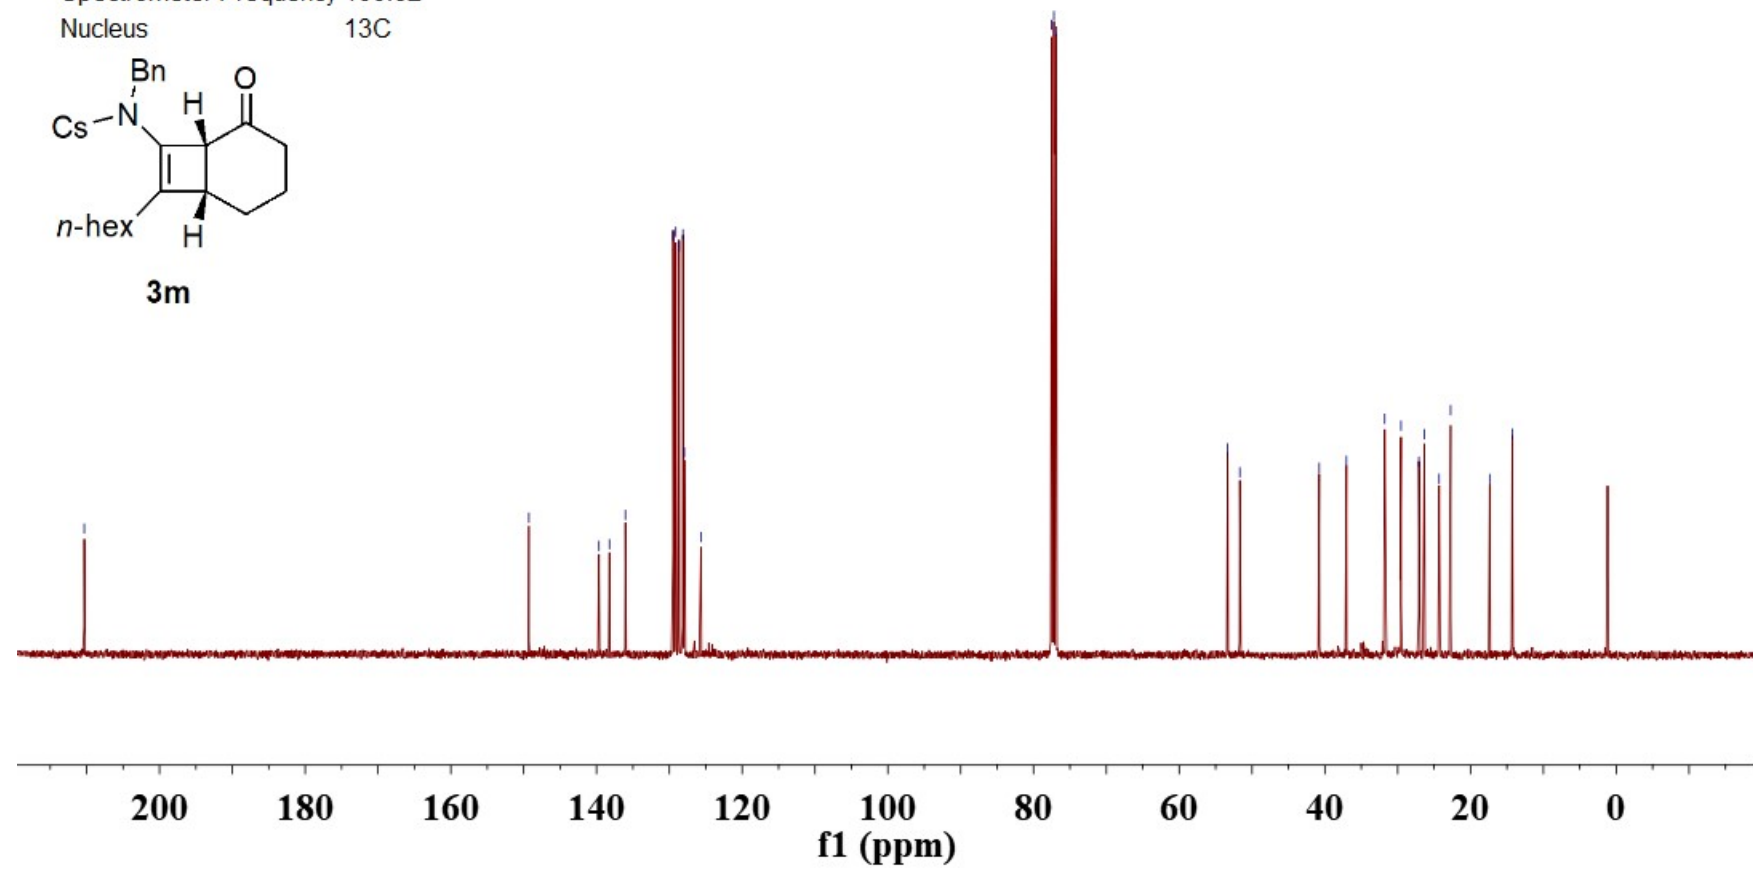

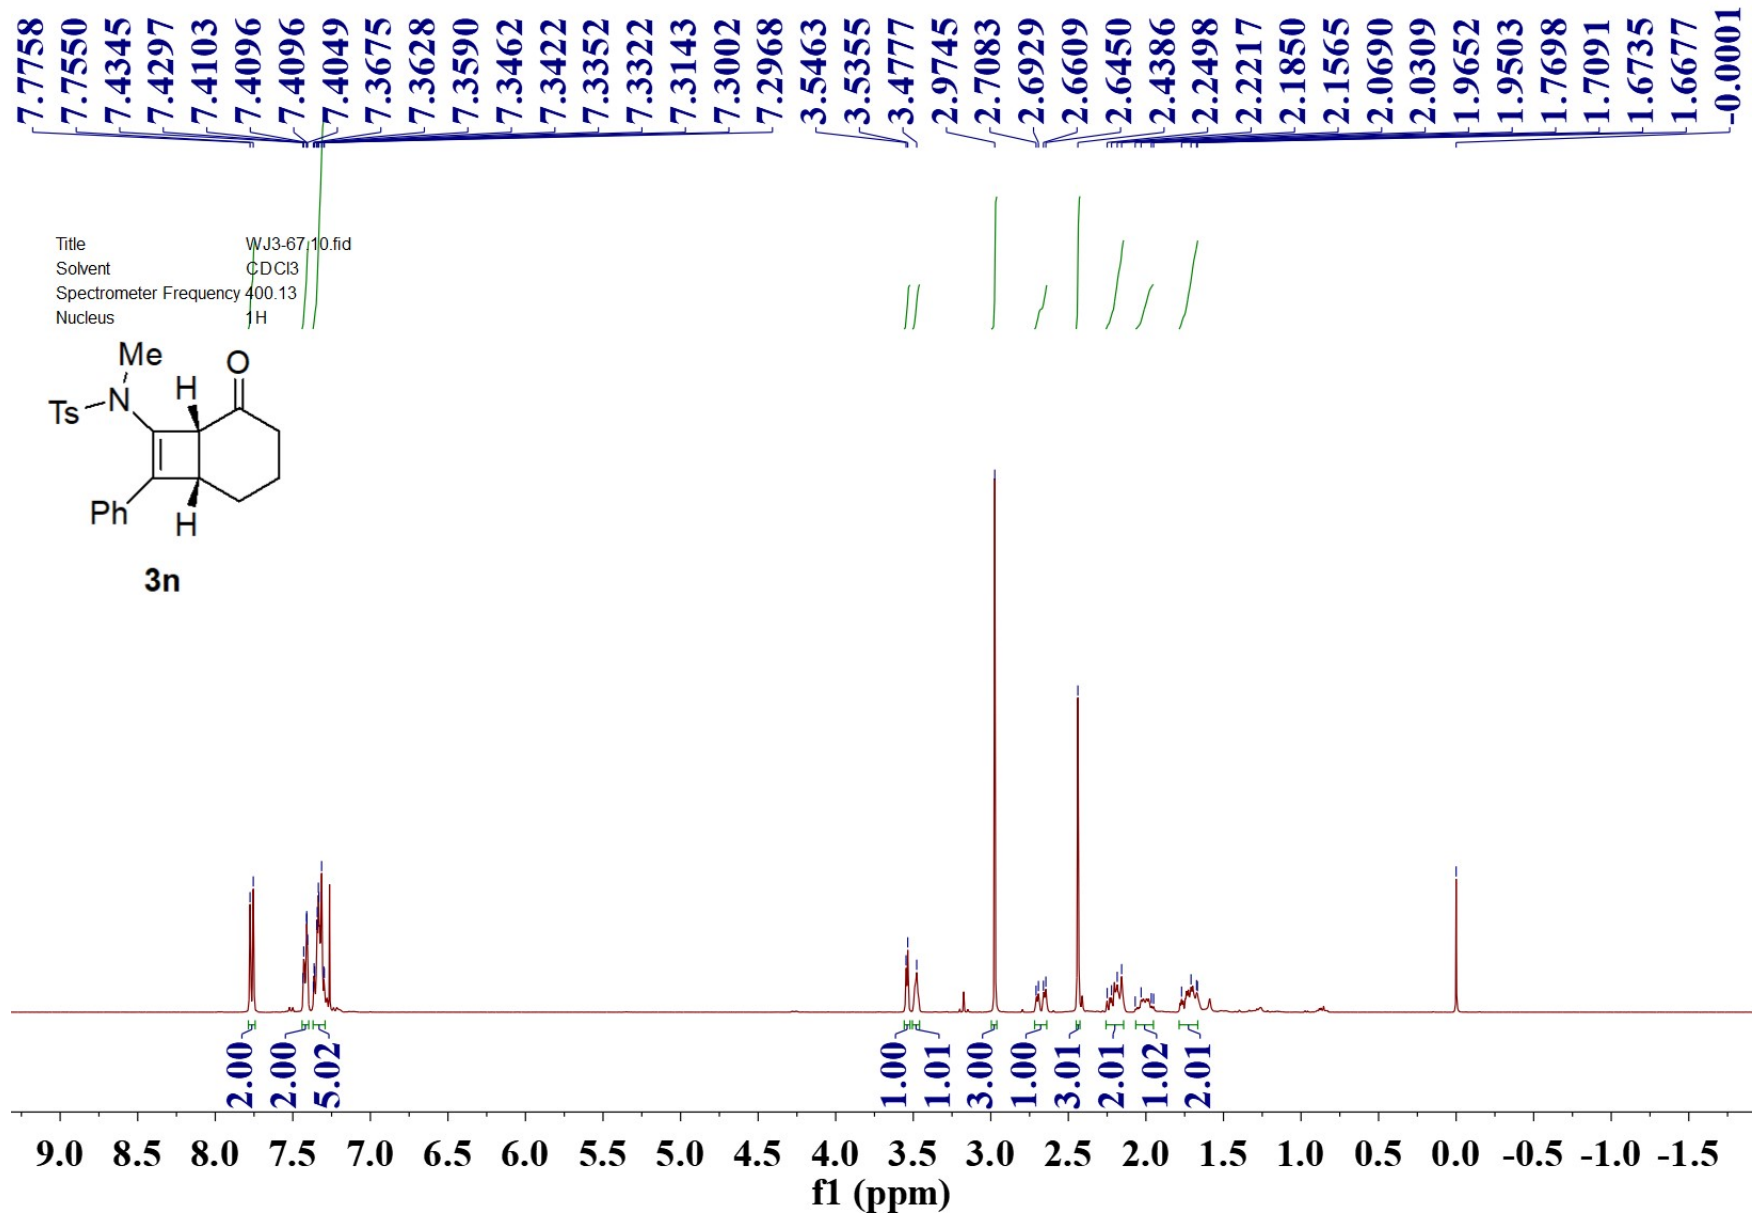

210.868

144.140  
141.767  
135.522  
131.651  
129.869  
128.792  
128.609  
127.931  
127.292

77.521  
77.203  
76.852

54.974

40.210  
37.399  
35.741  
24.827  
21.738  
17.801

Title WJ3-67 20.fid  
Solvent CDCl3  
Spectrometer Frequency 100.62  
Nucleus 13C

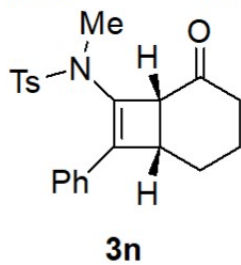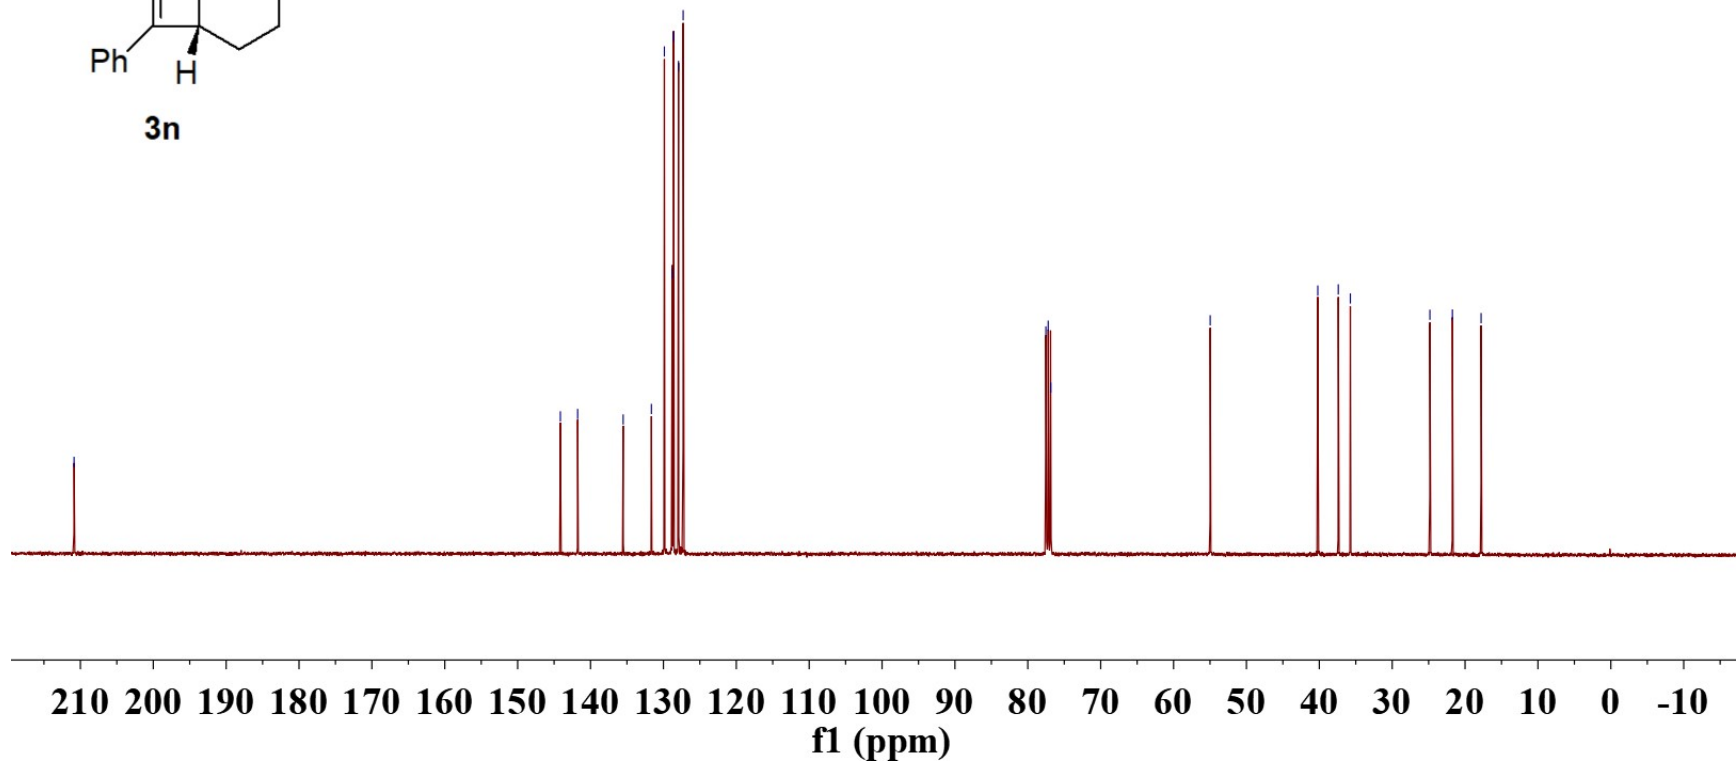



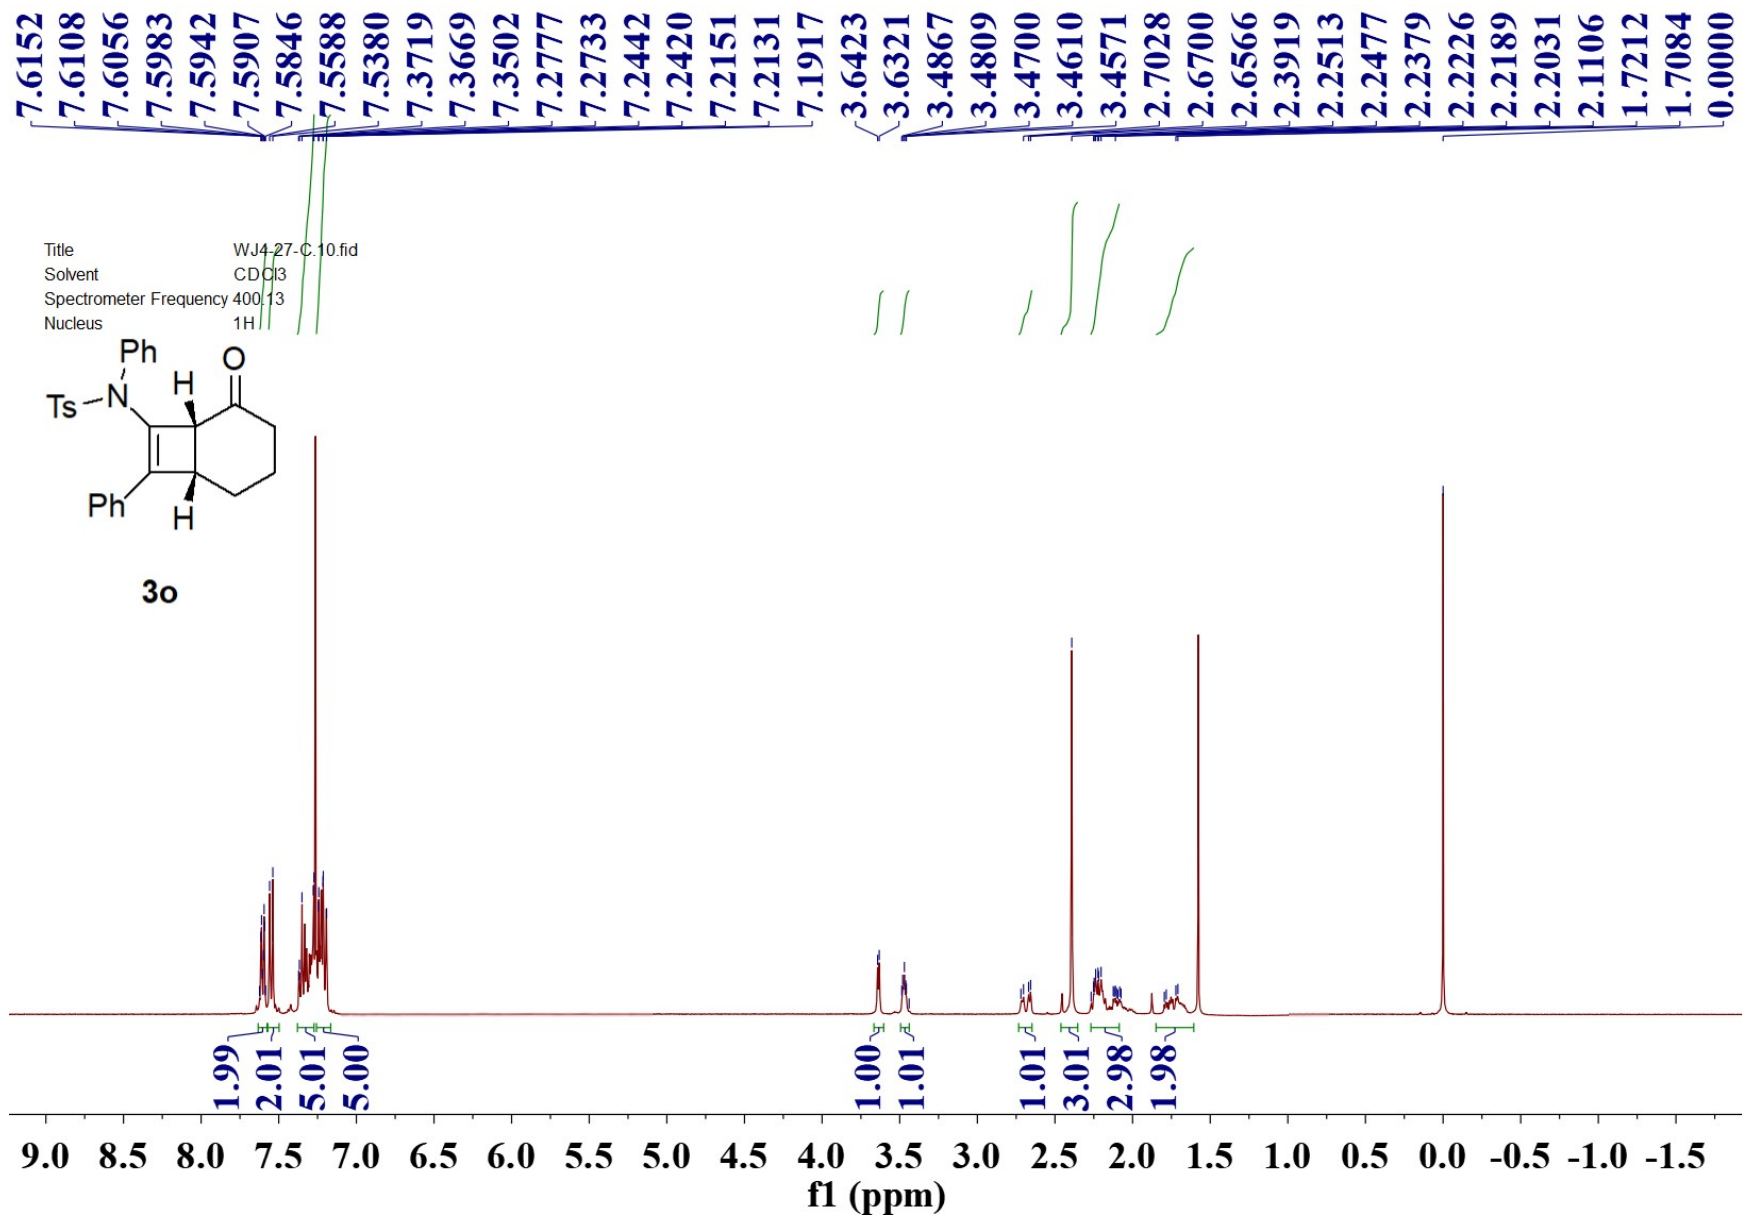

211.249

145.042  
144.150  
138.471  
136.103  
131.211  
129.504  
129.445  
129.080  
128.684  
128.489  
128.205  
127.734  
127.269

77.518  
77.201  
76.883

56.067

40.501  
37.231

24.851  
21.803  
17.814

Title WJ4-27-C.20.fid  
Solvent CDCl3  
Spectrometer Frequency 100.62  
Nucleus 13C

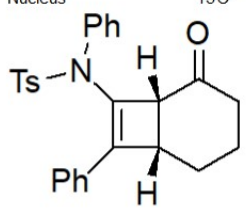

3o

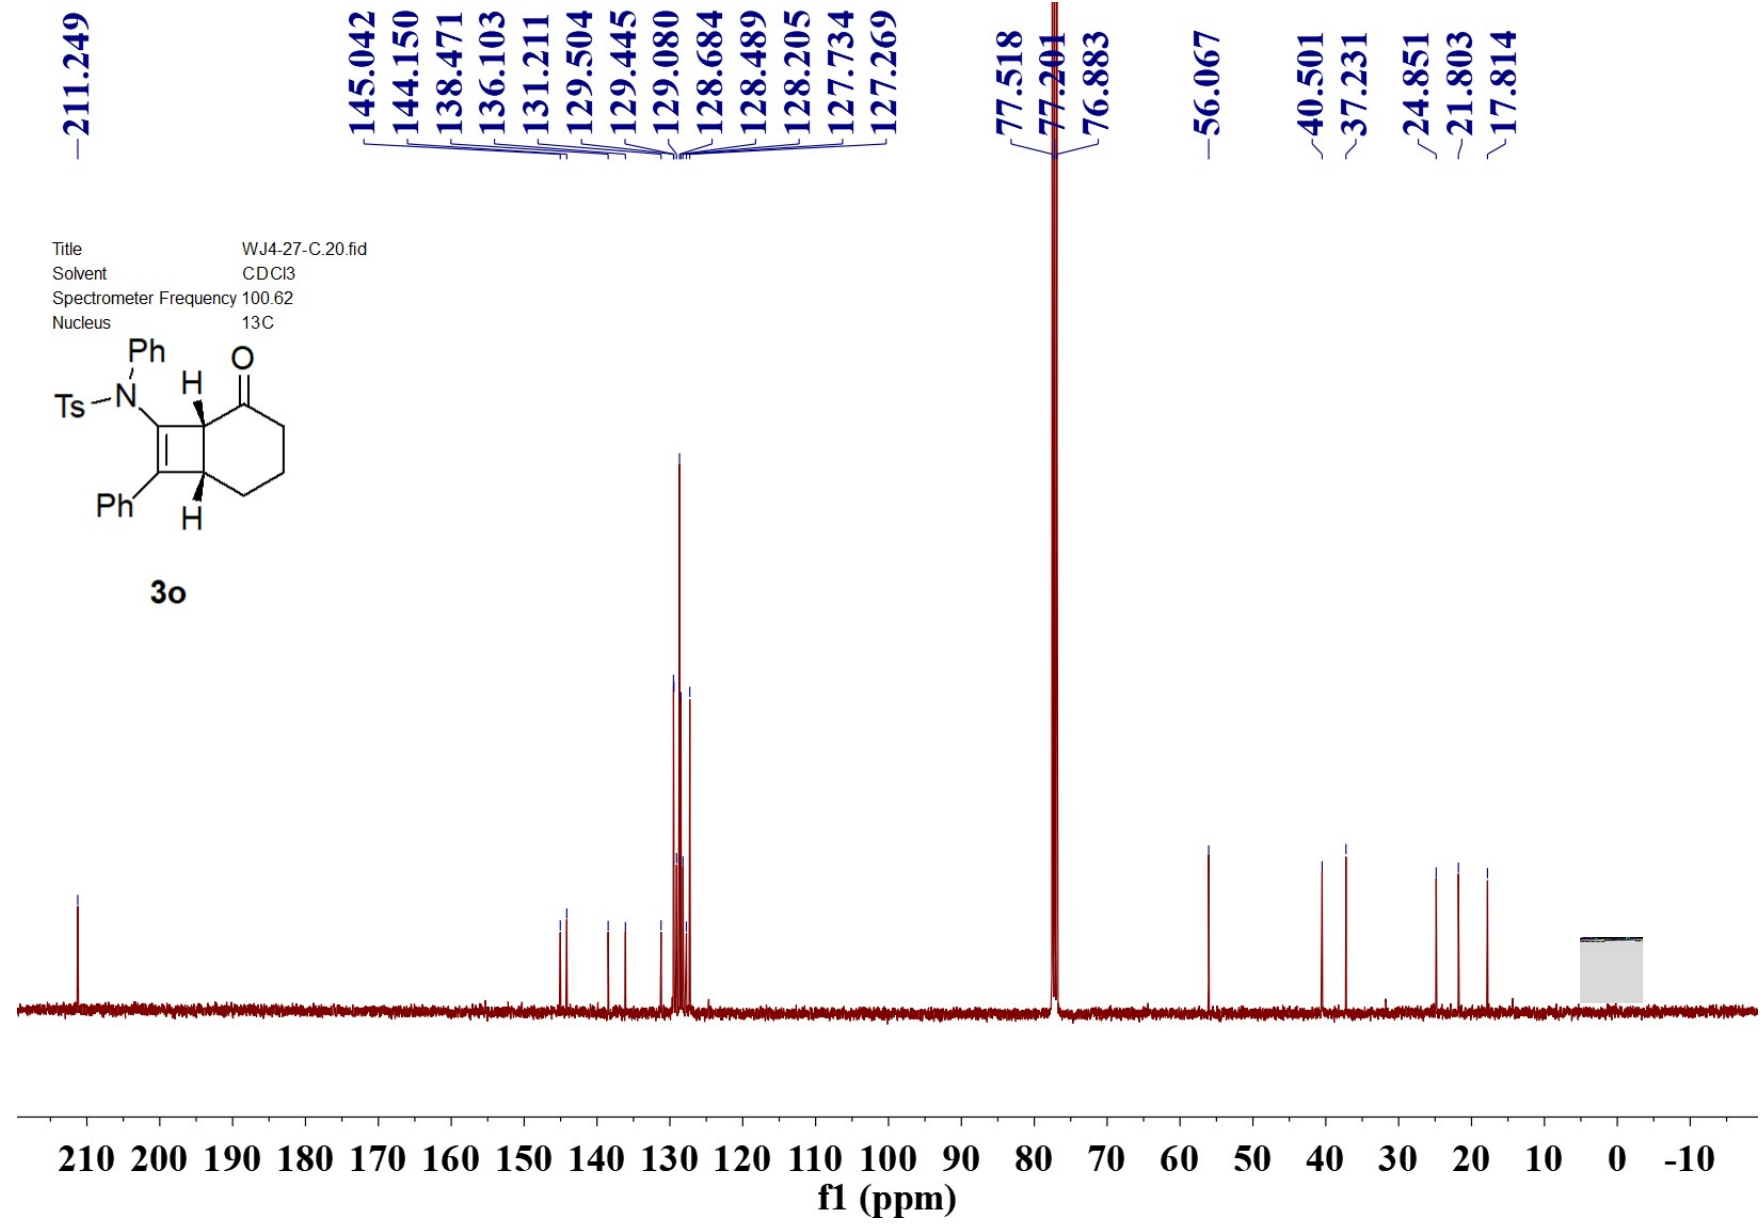

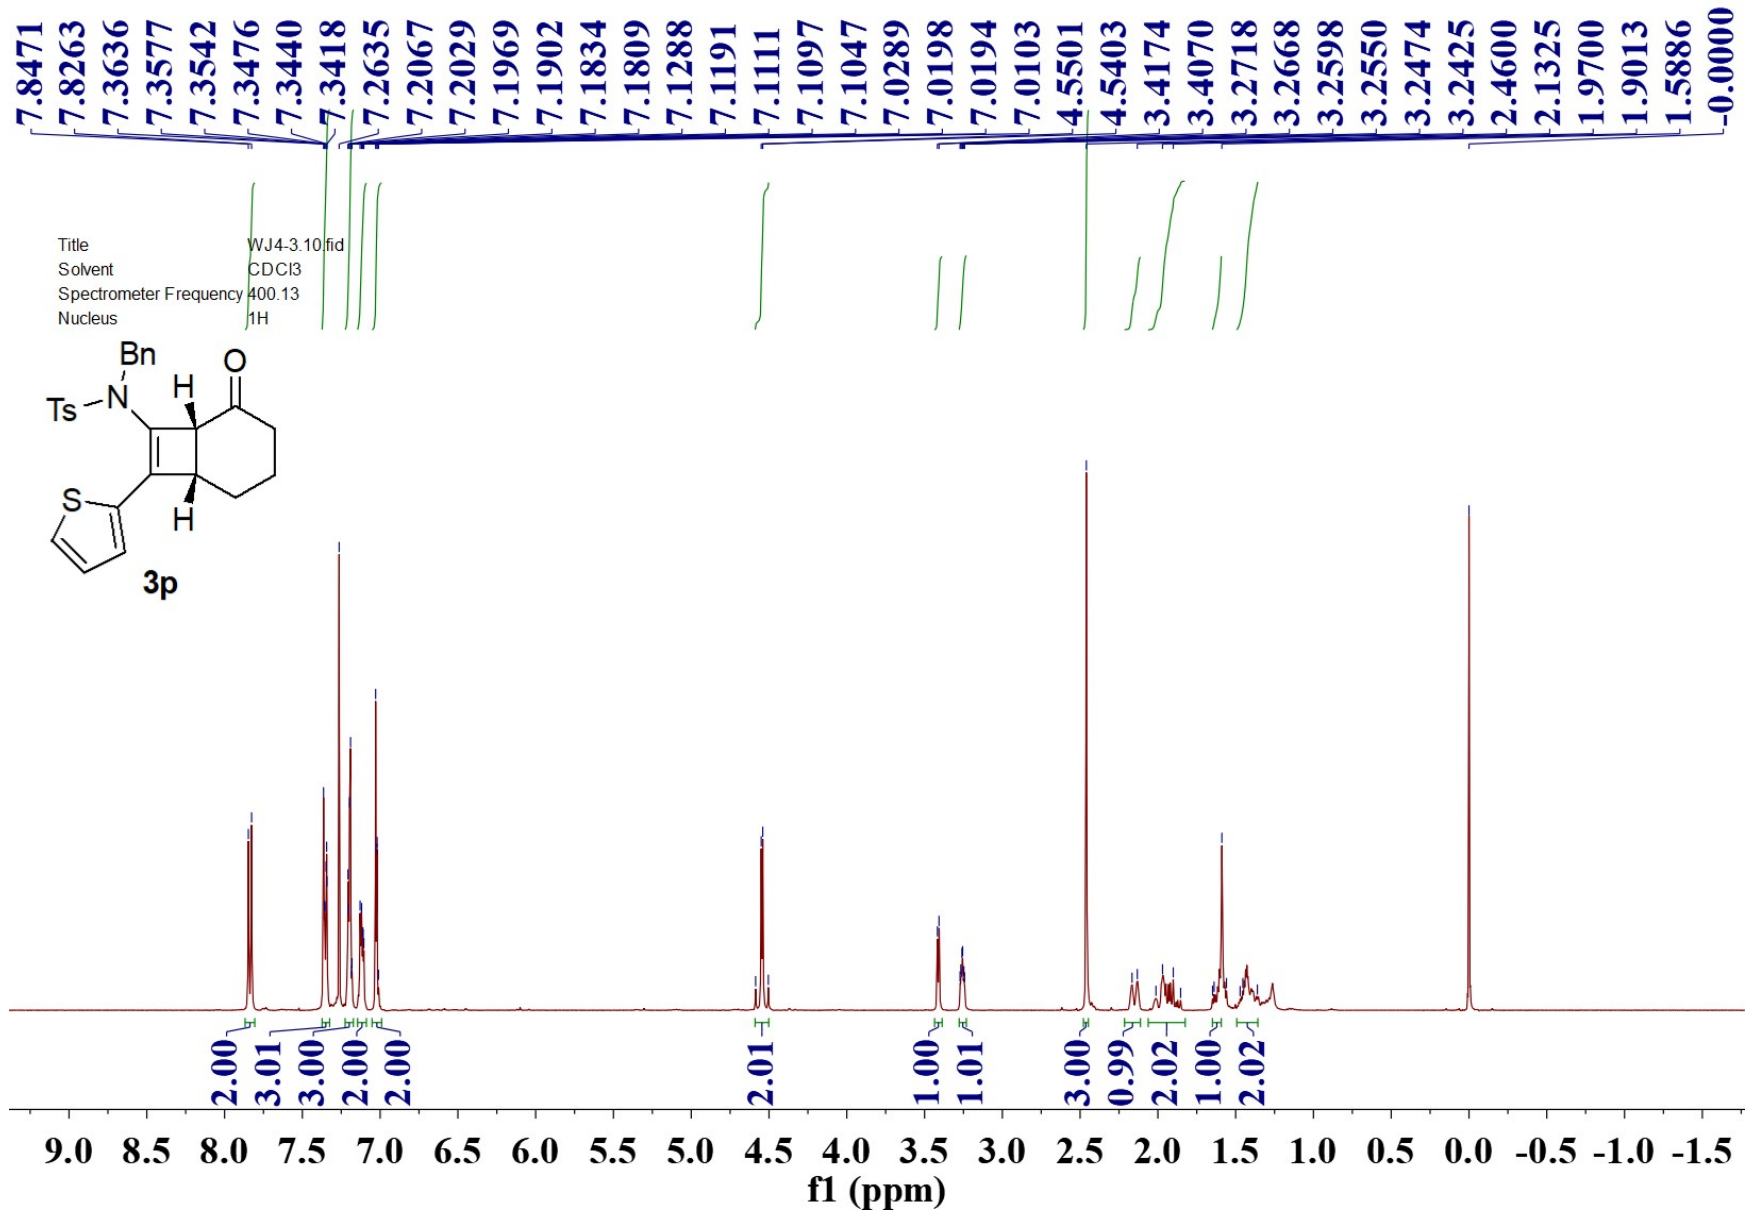

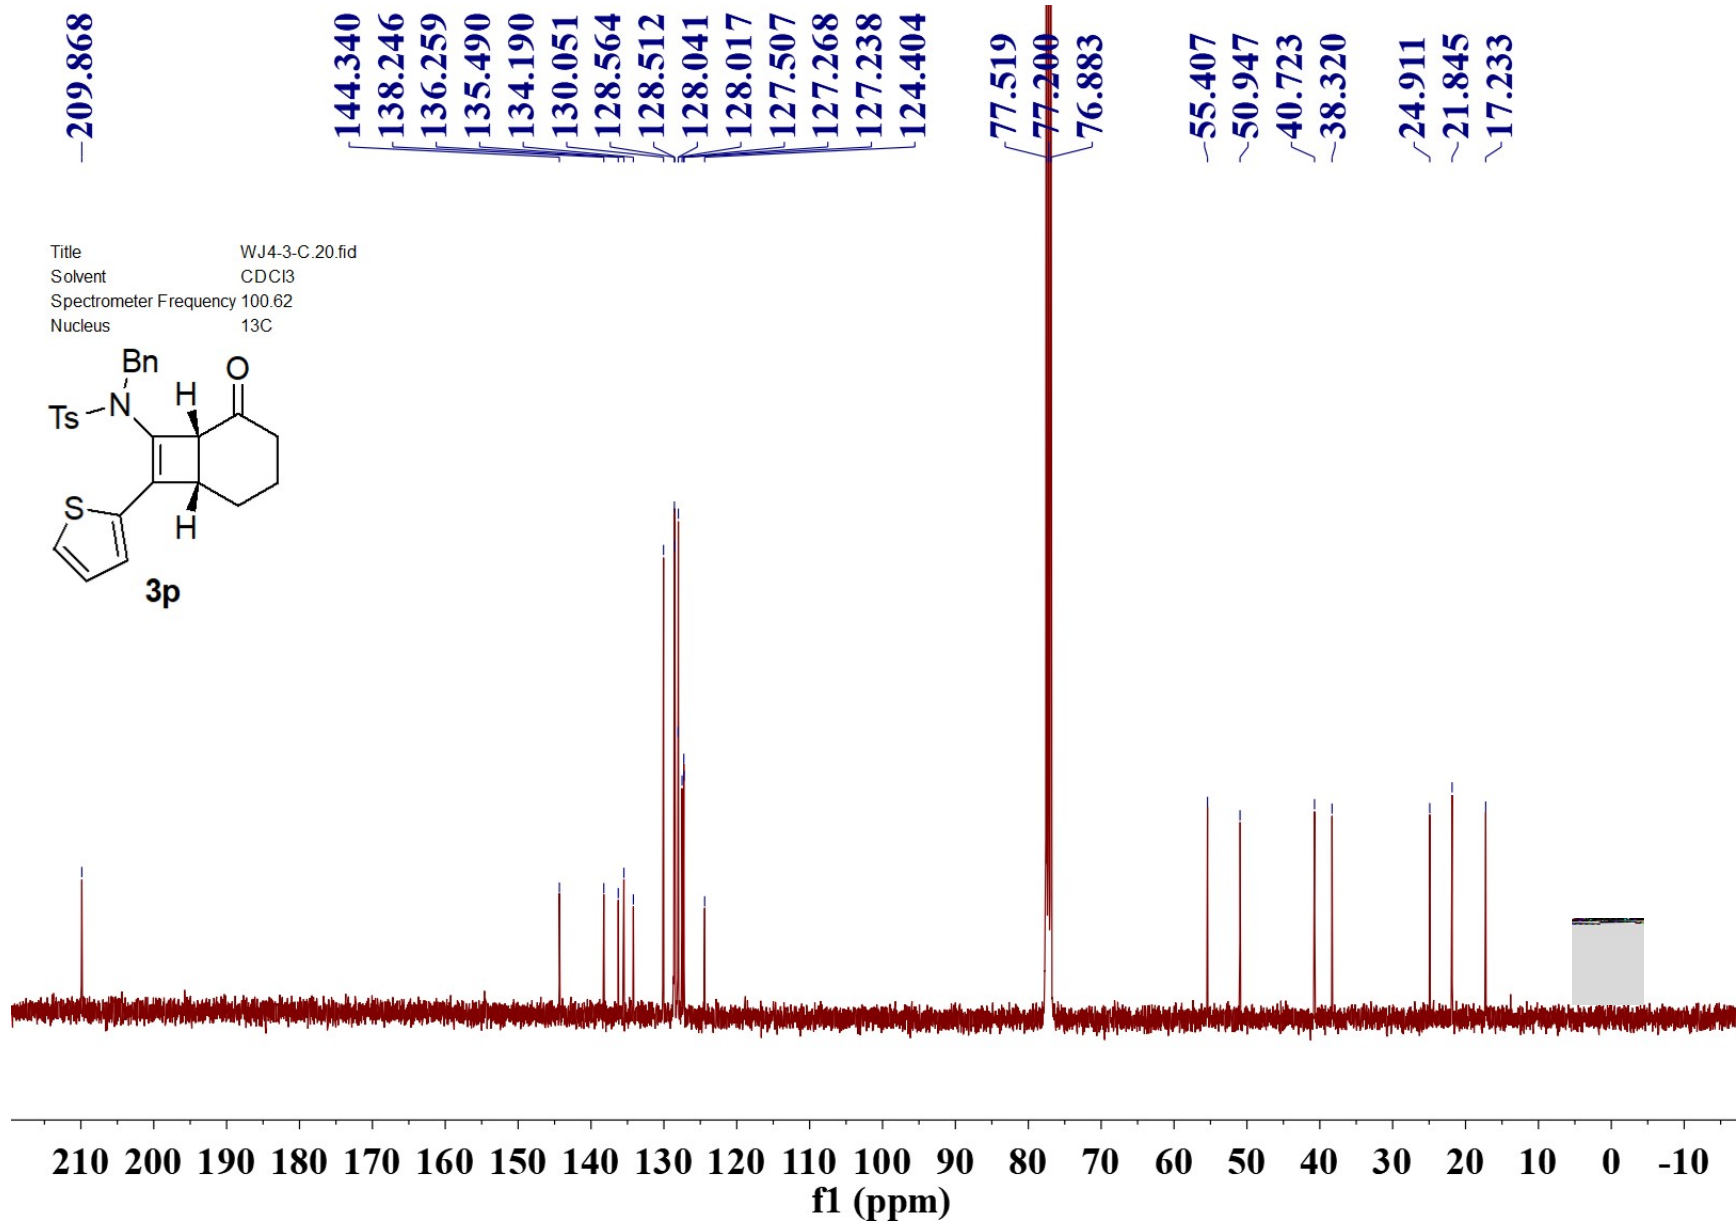

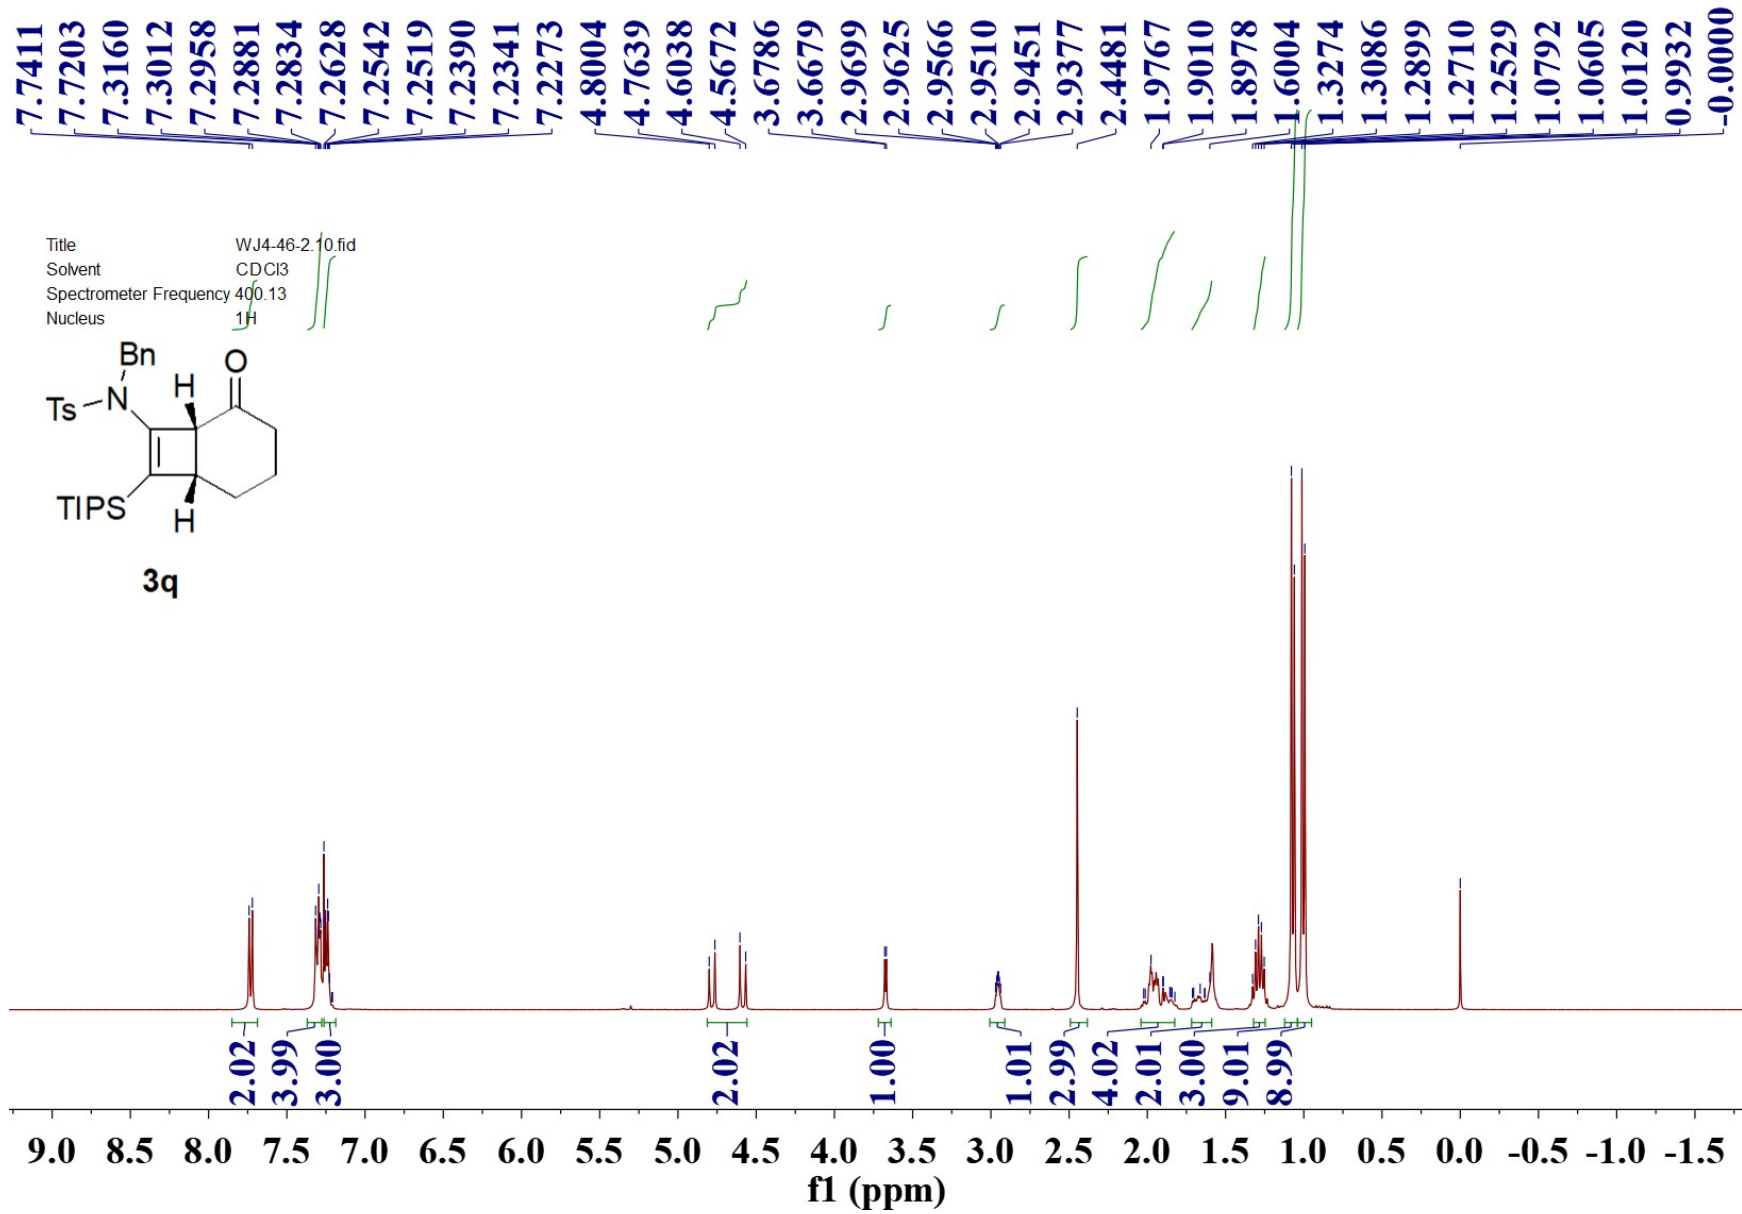

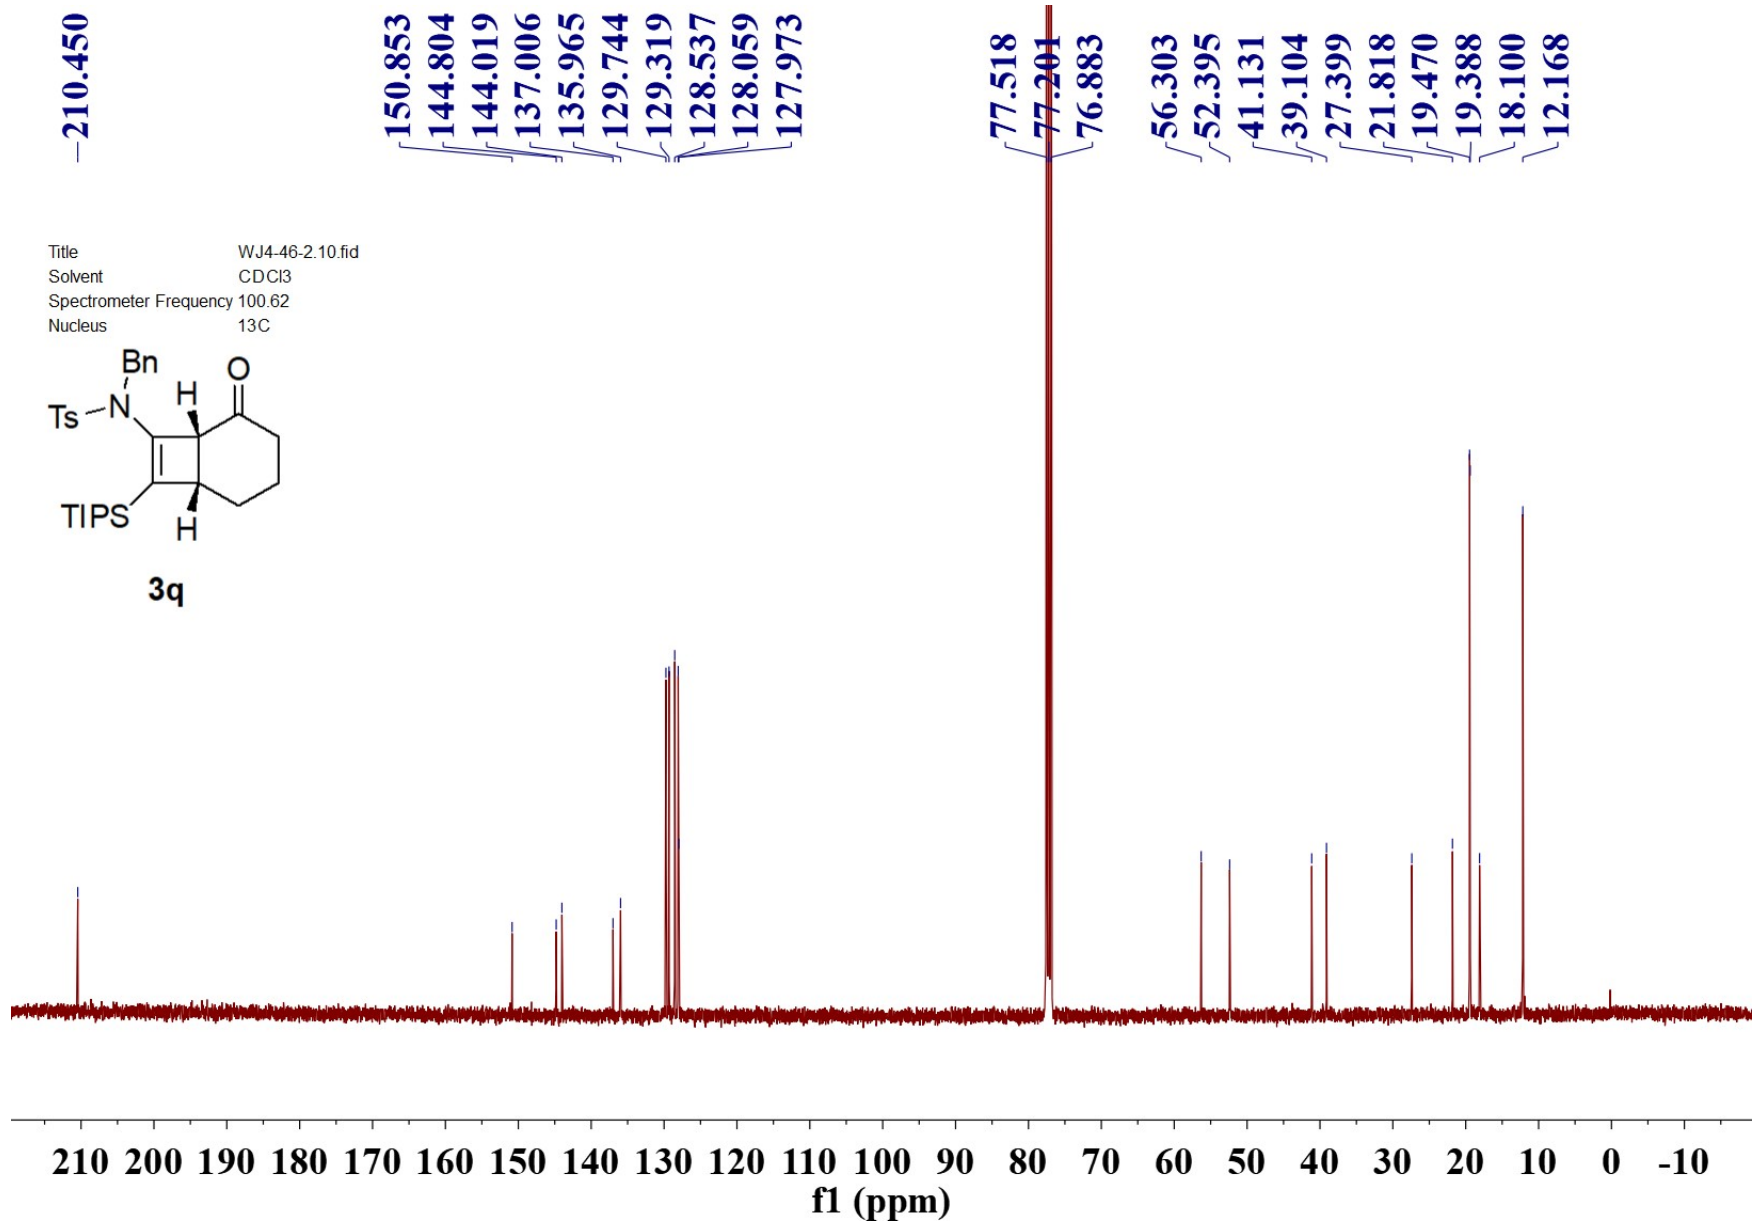



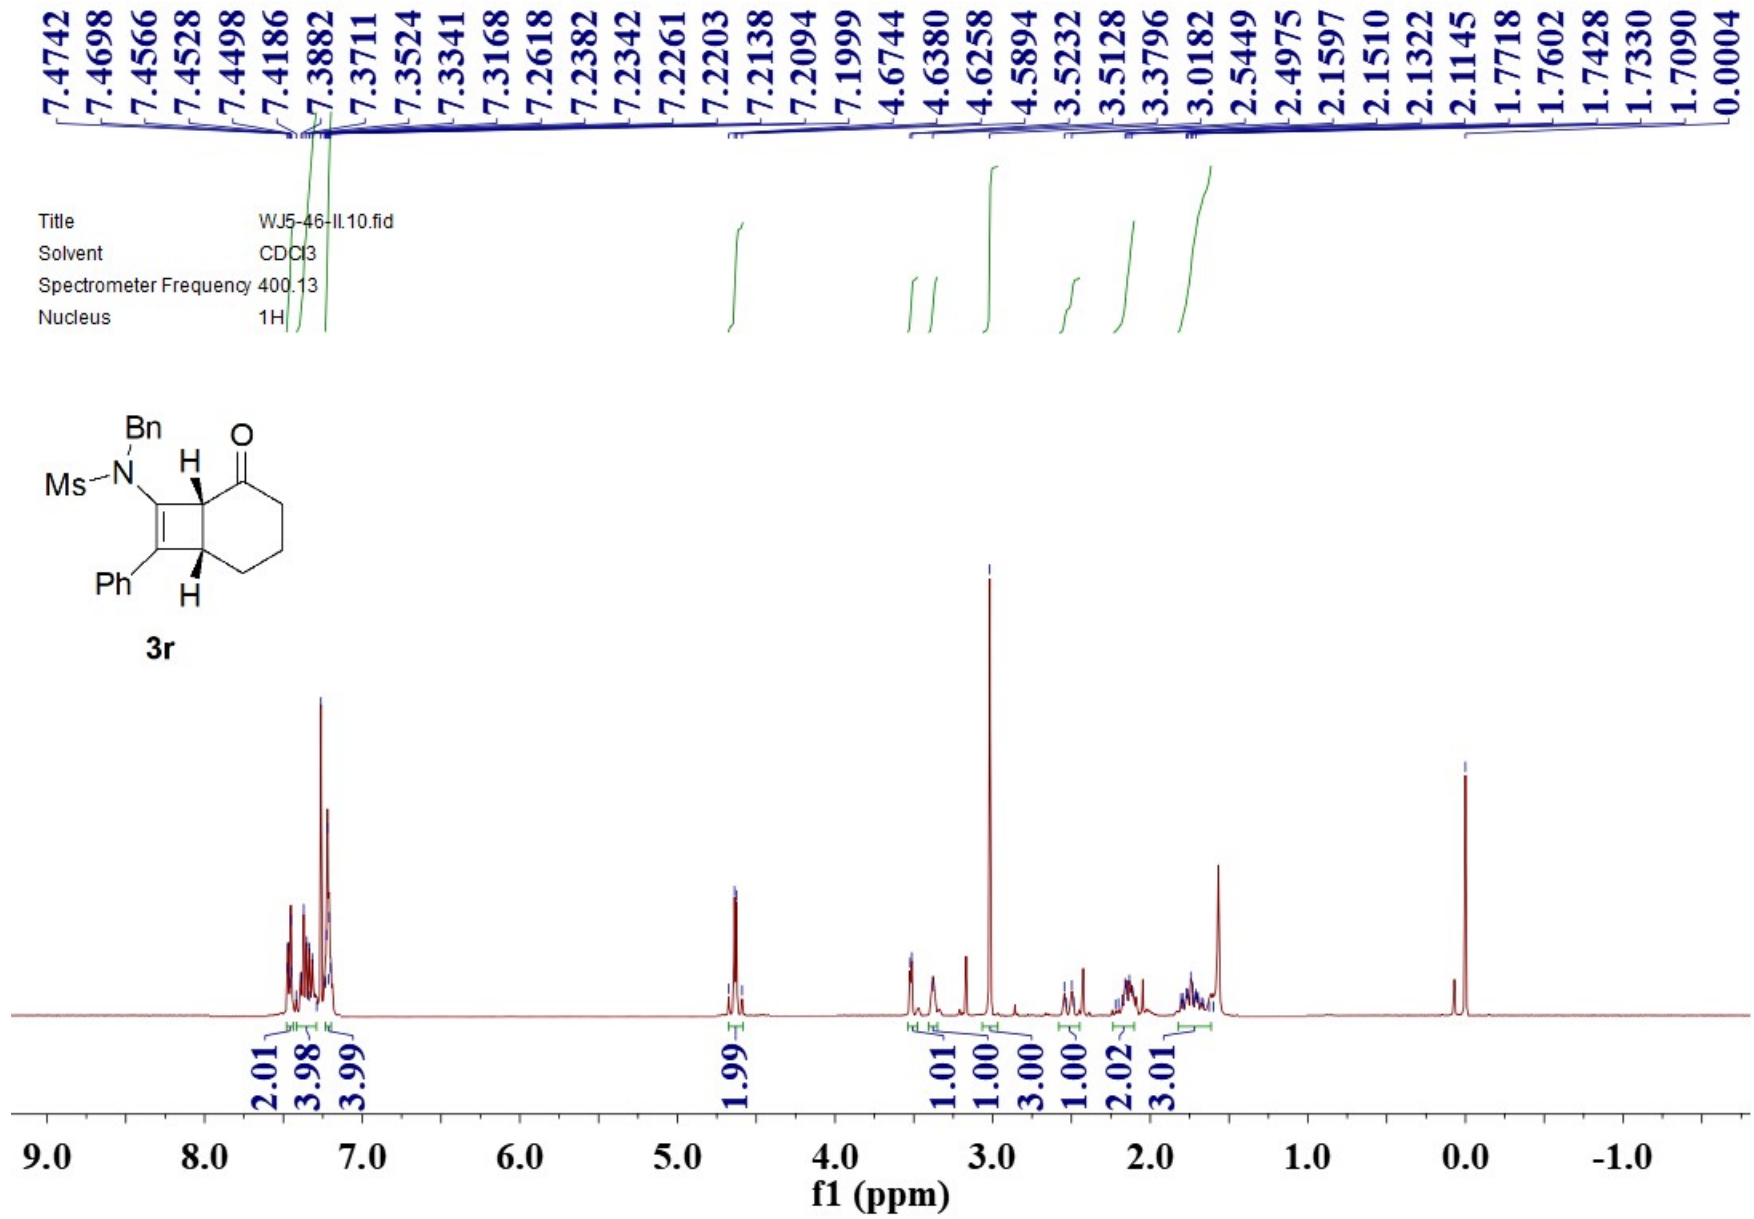

211.626

144.166  
135.548  
131.729  
129.062  
128.759  
128.672  
128.311  
127.319  
126.991

77.517  
77.200  
76.882

54.890  
52.314  
41.777  
41.115  
37.101  
25.021  
17.543

Title WJ5-46-II.10.fid  
Solvent CDCl3  
Spectrometer Frequency 100.62  
Nucleus 13C

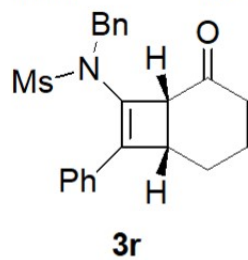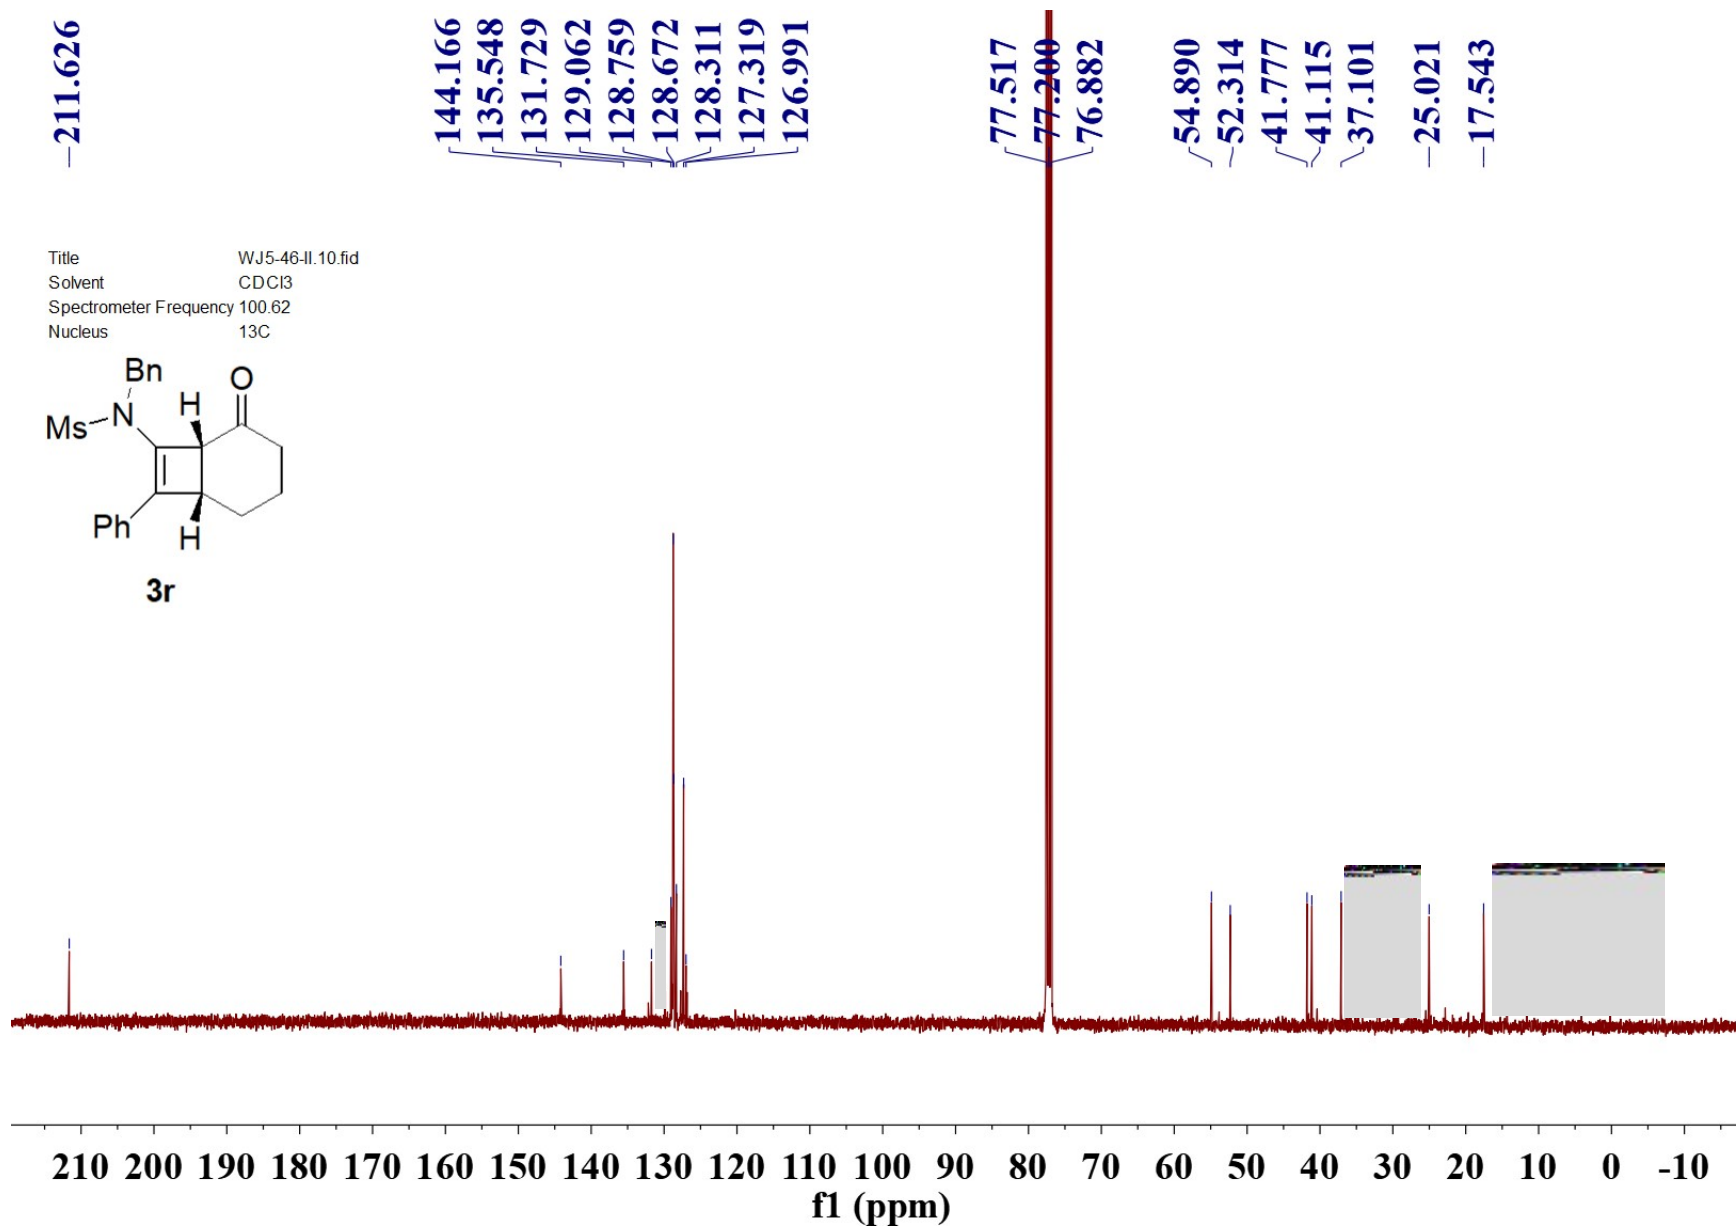

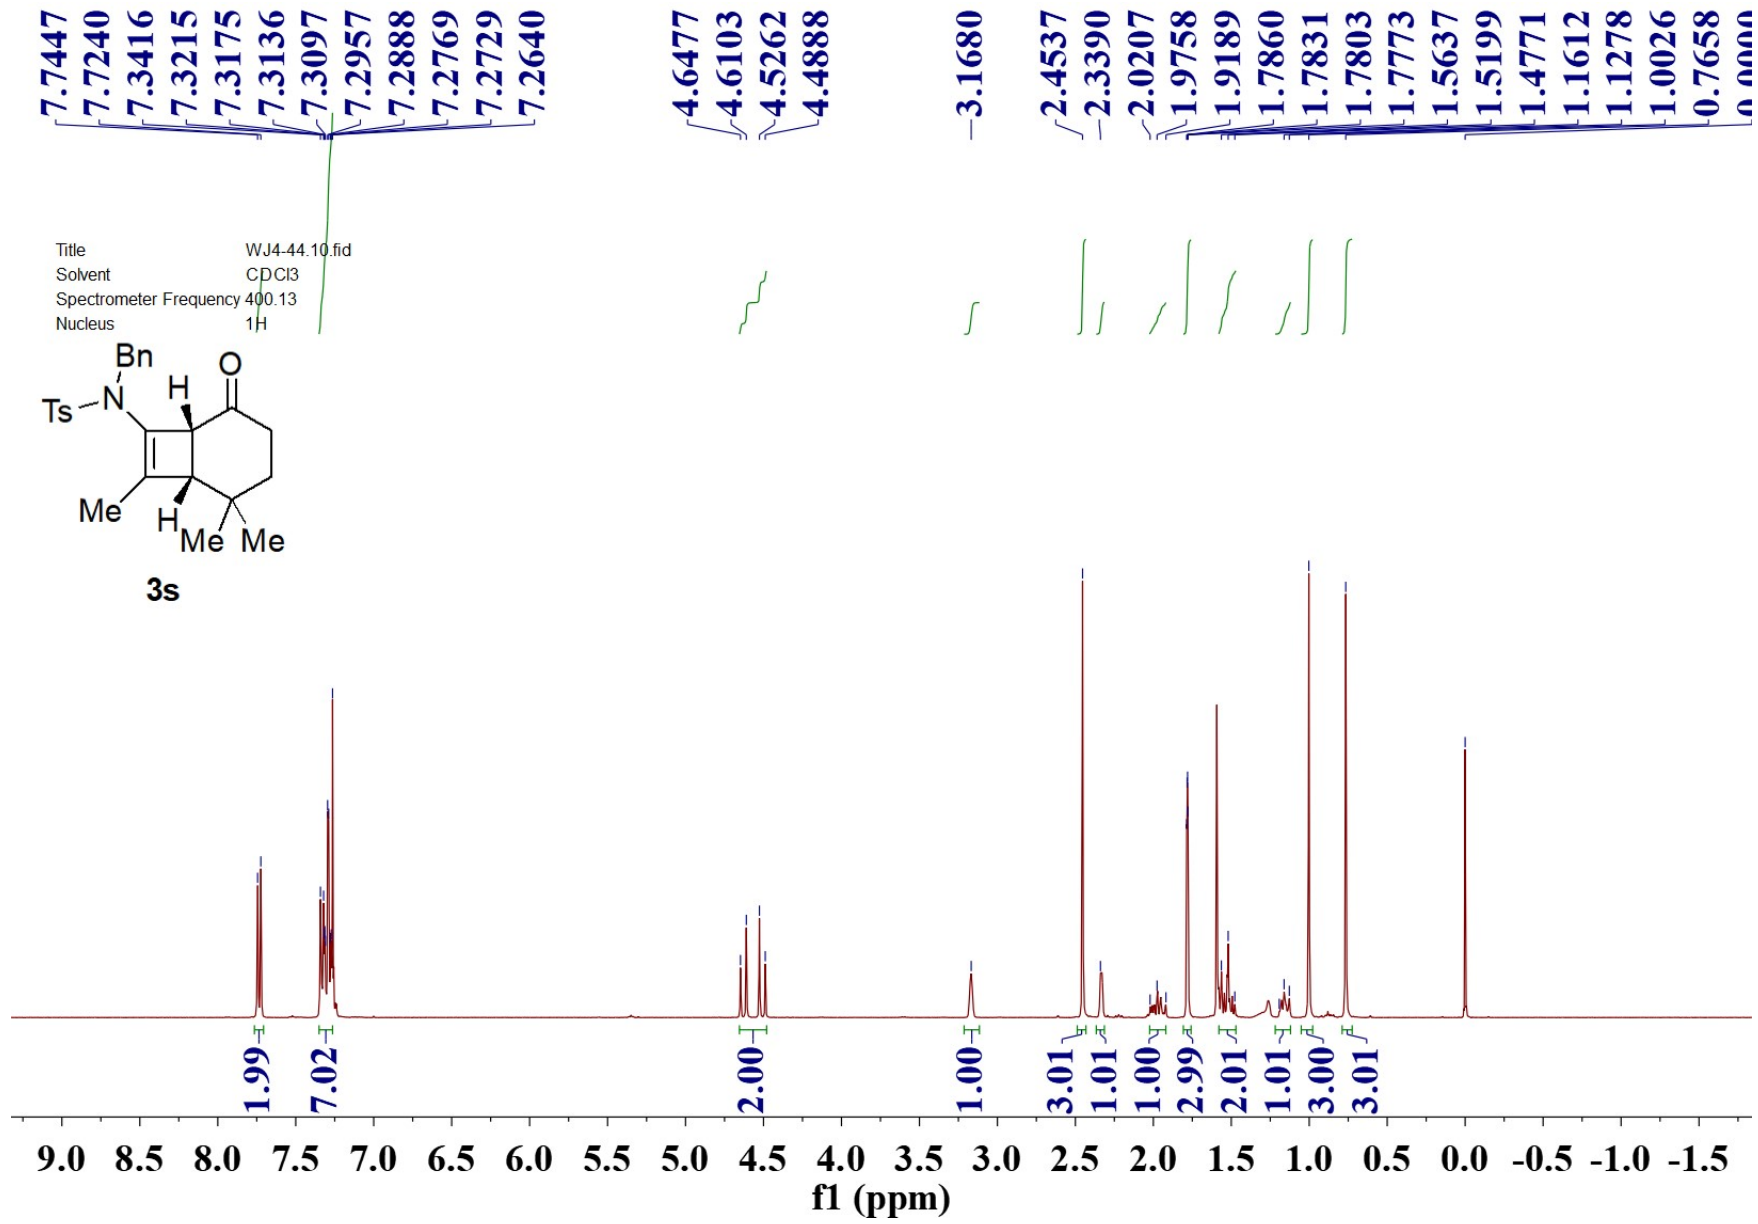

211.748

145.449  
144.099  
136.783  
136.443  
129.908  
128.667  
128.341  
127.944  
127.820  
127.638

77.518  
77.200  
76.882

54.130  
51.465  
51.097  
35.795  
32.644  
30.865  
28.142  
25.209  
21.824  
15.477

Title WJ4-44.10.fid  
Solvent CDCl3  
Spectrometer Frequency 100.62  
Nucleus 13C

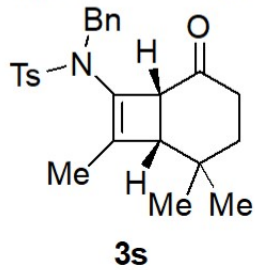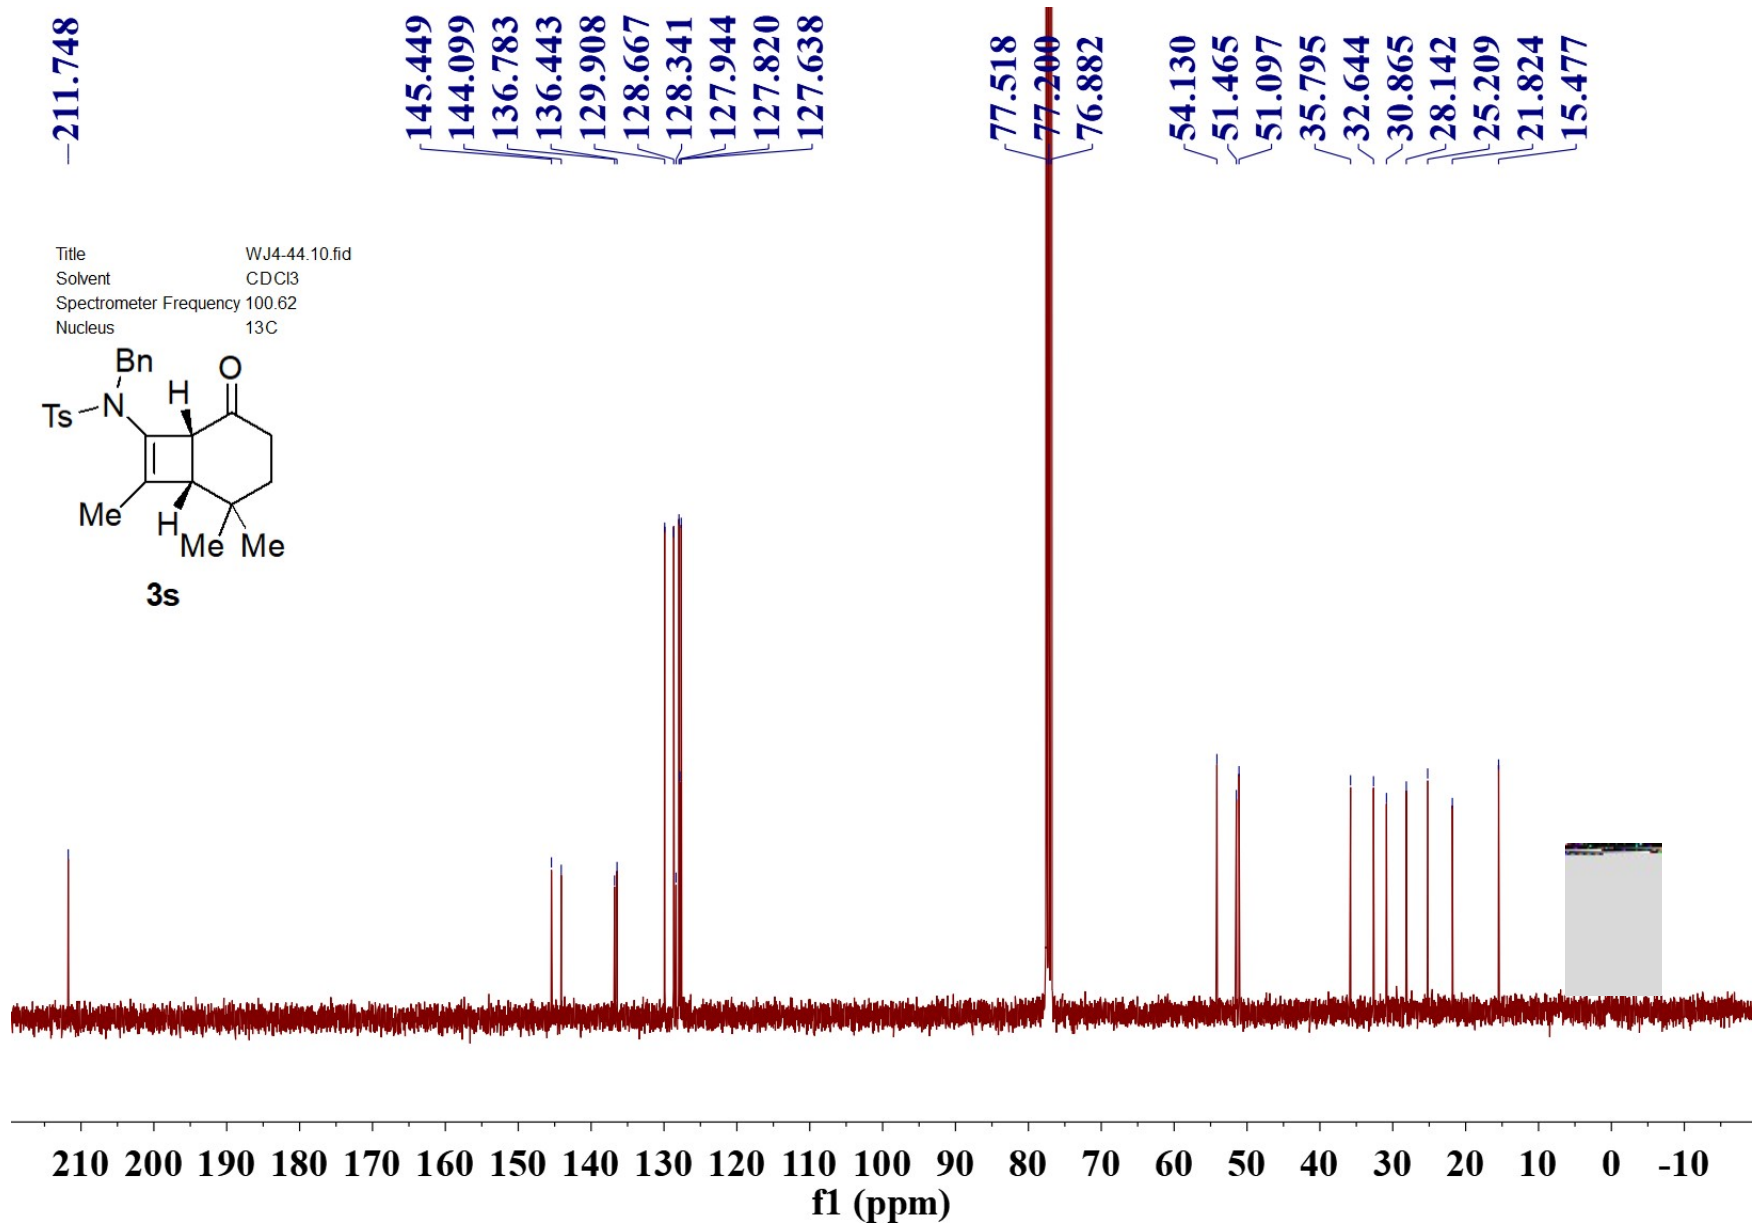

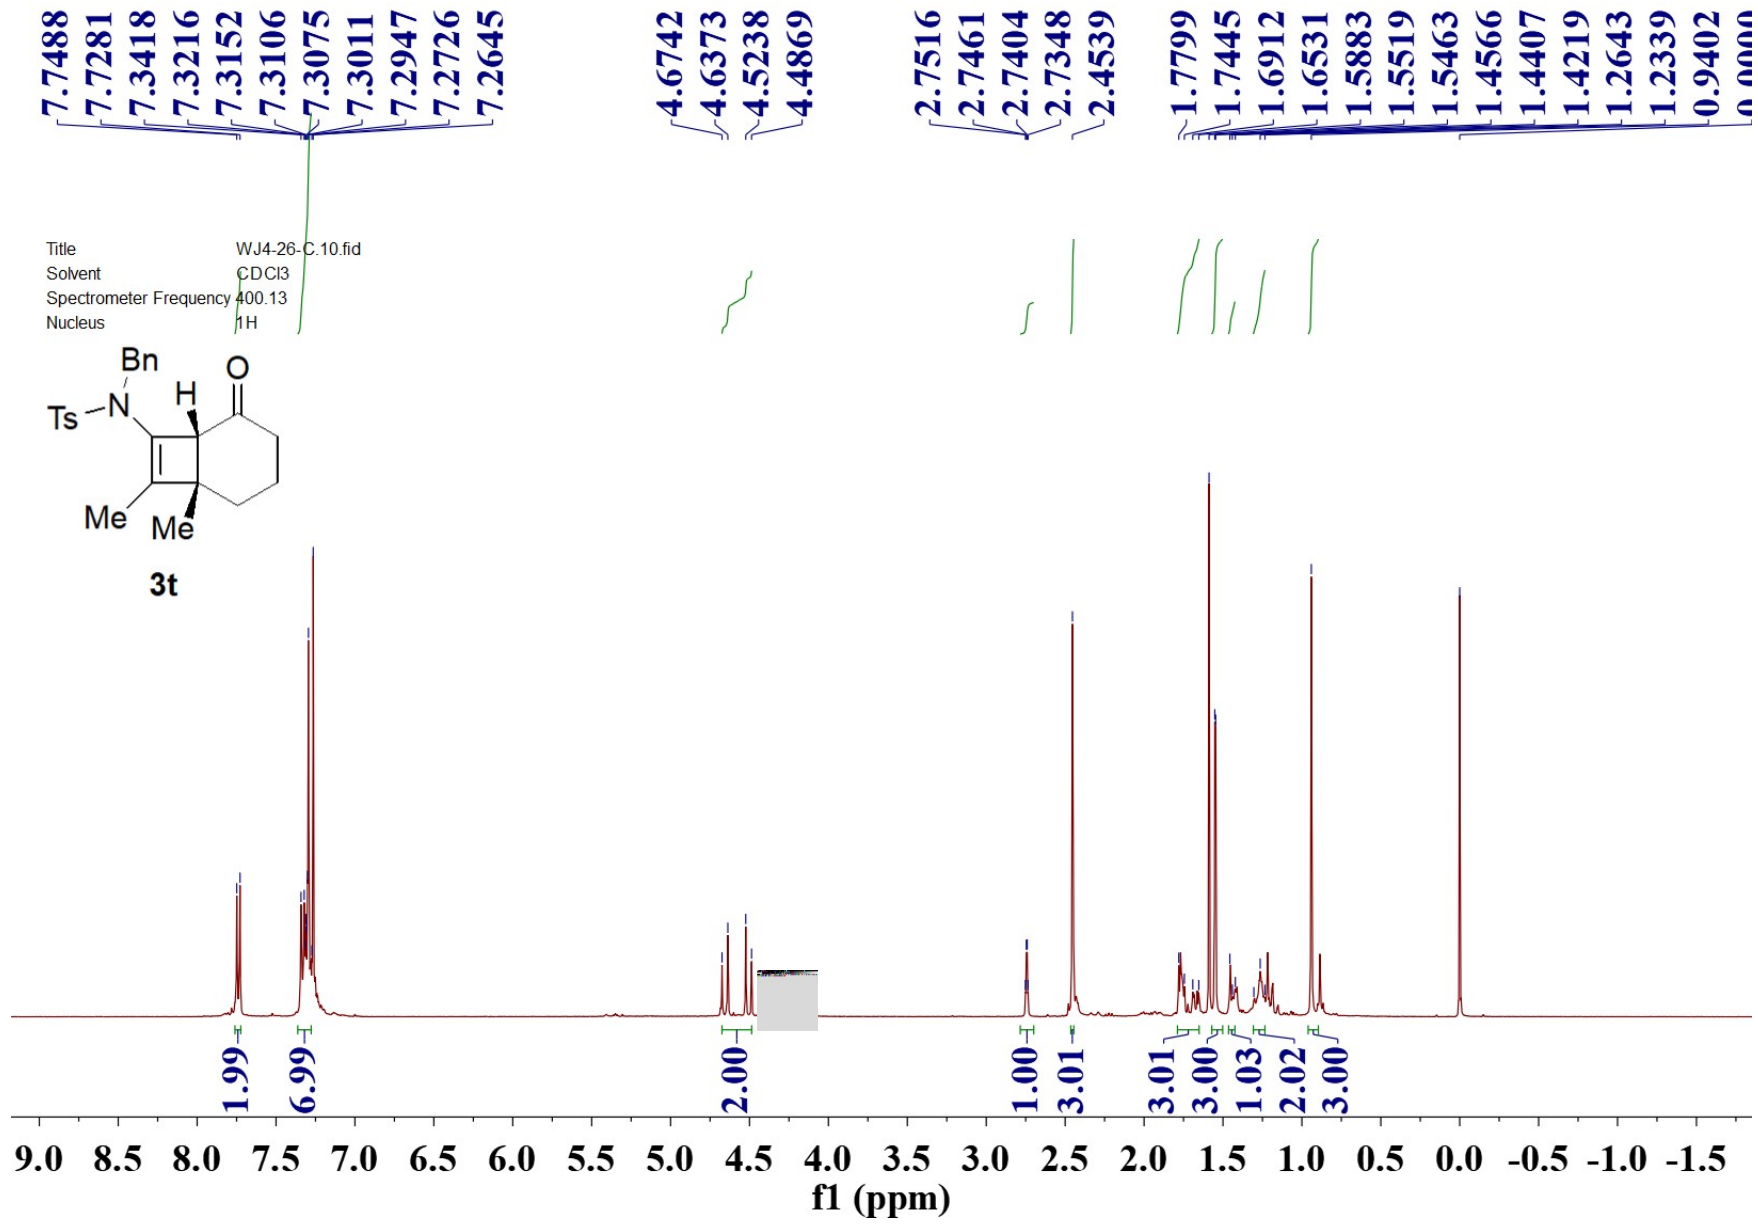

-211.755

148.067  
144.191  
136.817  
136.508  
129.996  
128.740  
128.218  
127.953  
127.807  
126.028

77.670  
77.201  
77.036

62.061  
51.588  
43.349  
39.917  
31.108  
23.762  
21.970  
18.524  
10.155

Title WJ4-26-C.10.fid  
Solvent CDCl3  
Spectrometer Frequency 100.62  
Nucleus 13C

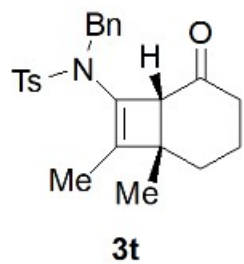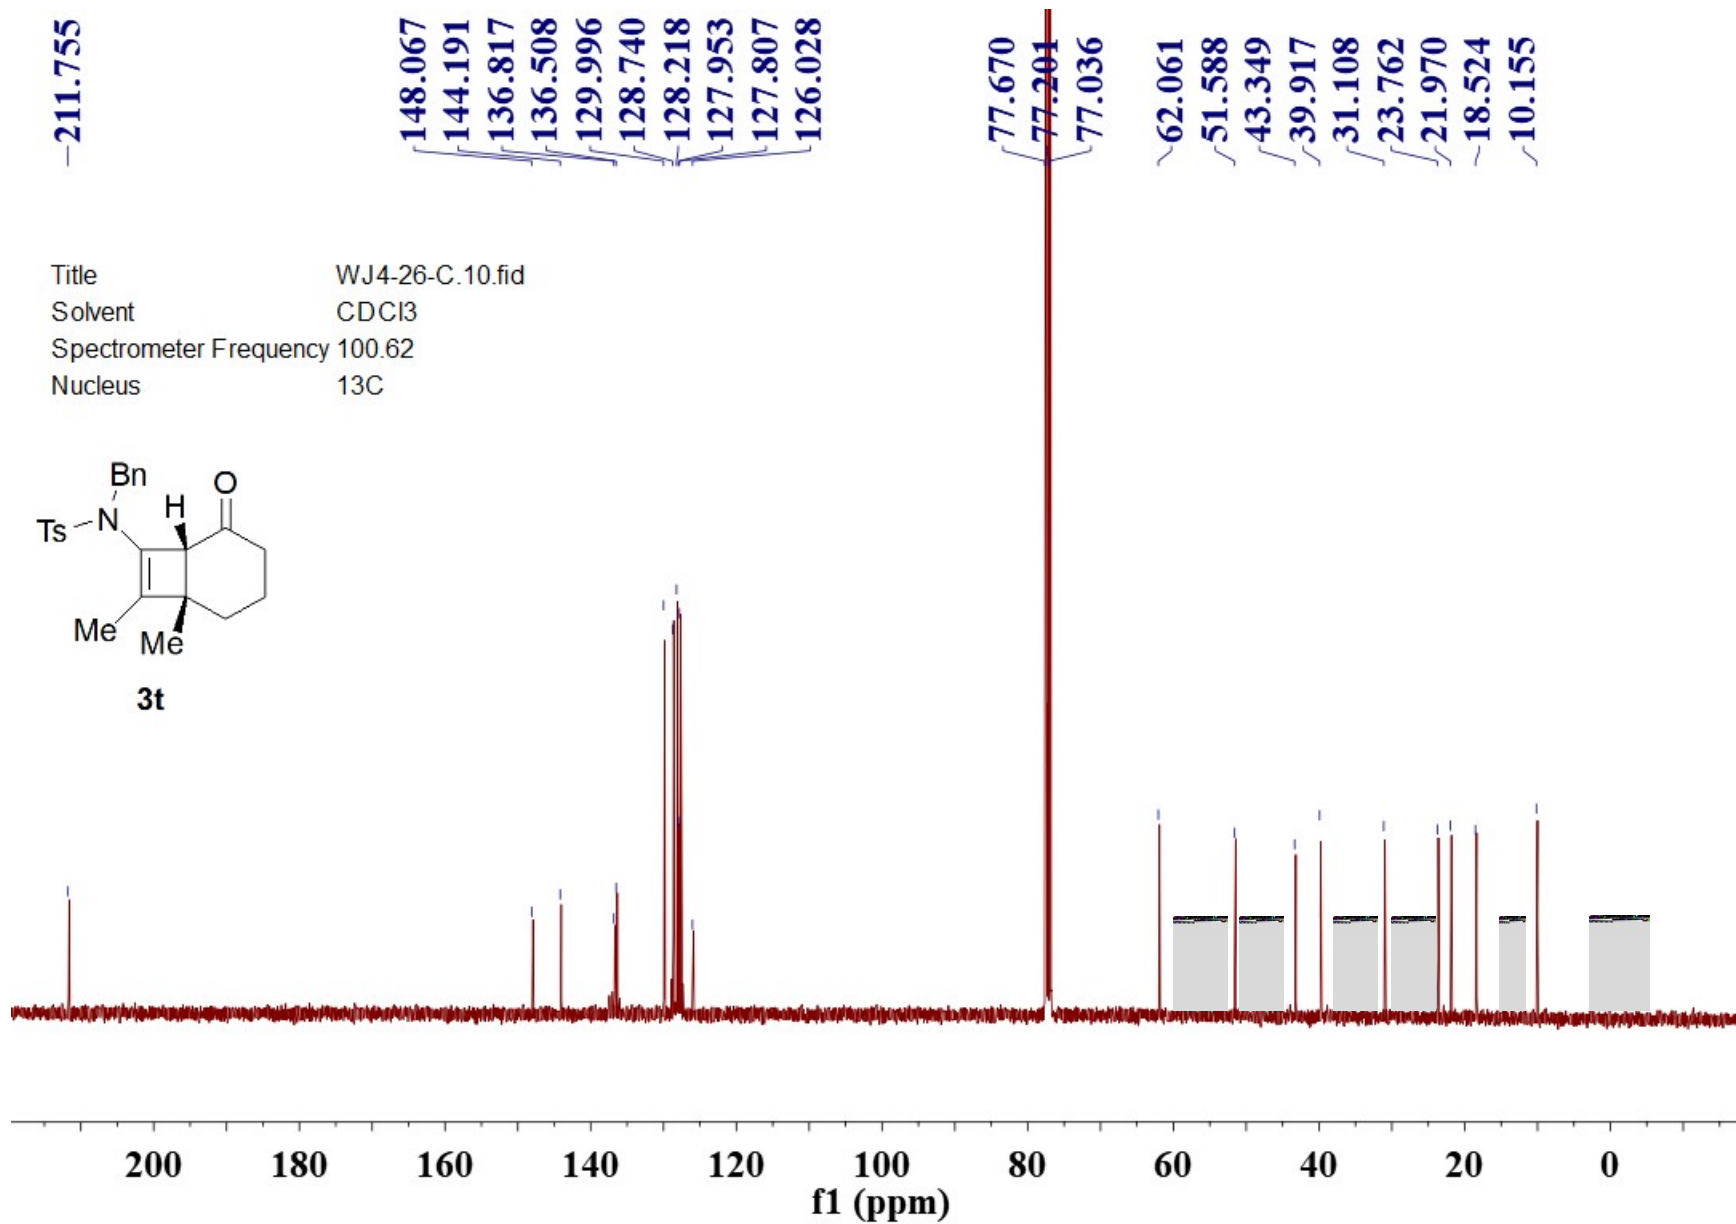



Title WJ3-78-3.10.fid  
Solvent CDCl3  
Spectrometer Frequency 400.13  
Nucleus 1H

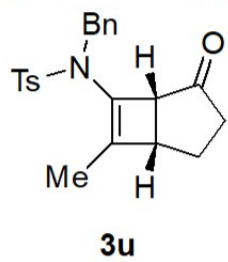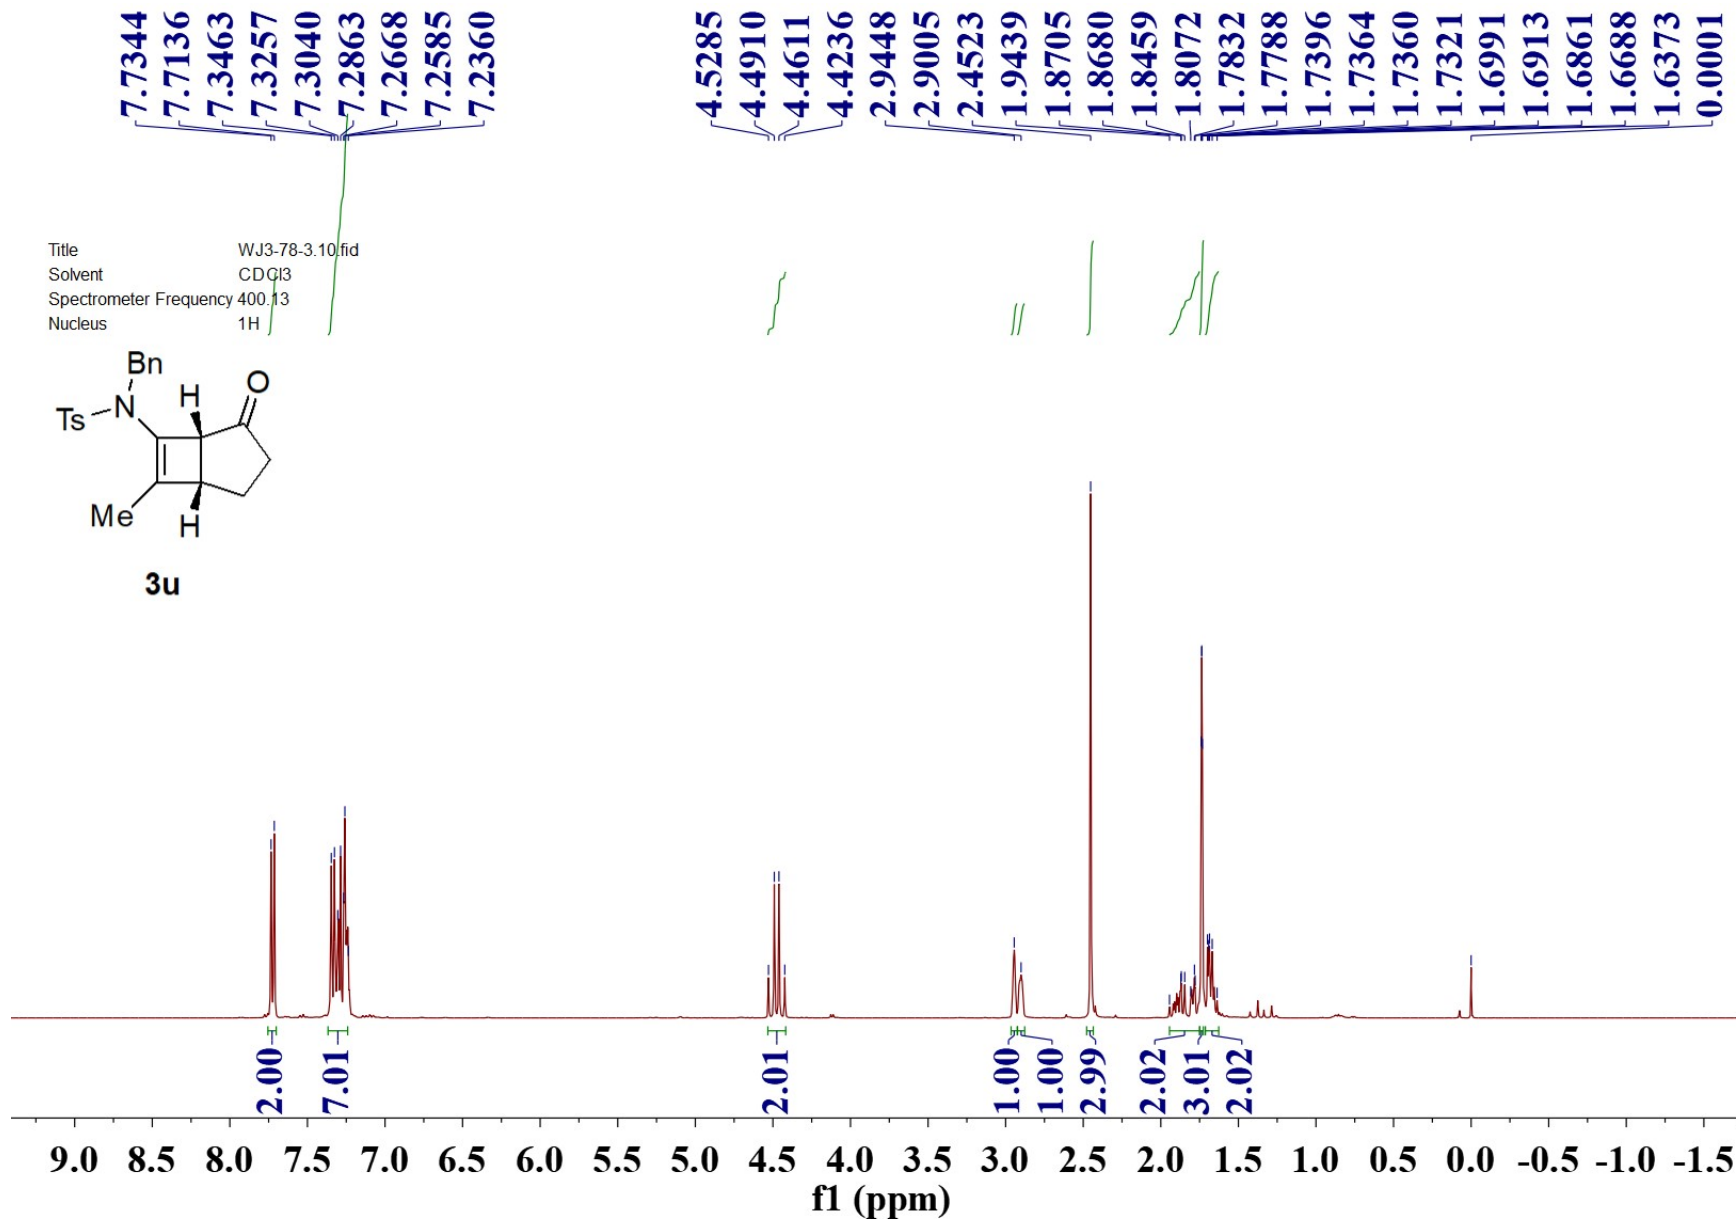

-216.016

144.325  
144.158  
136.487  
136.188  
129.993  
129.203  
128.649  
127.923  
127.822  
127.533

77.517  
77.200  
76.883

54.274  
51.254  
40.239  
34.115

21.818  
19.922  
13.074

Title WJ3-78C.10.fid  
Solvent CDCl3  
Spectrometer Frequency 100.62  
Nucleus 13C

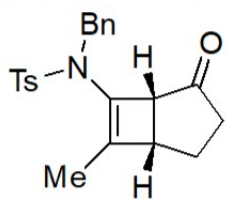

3u

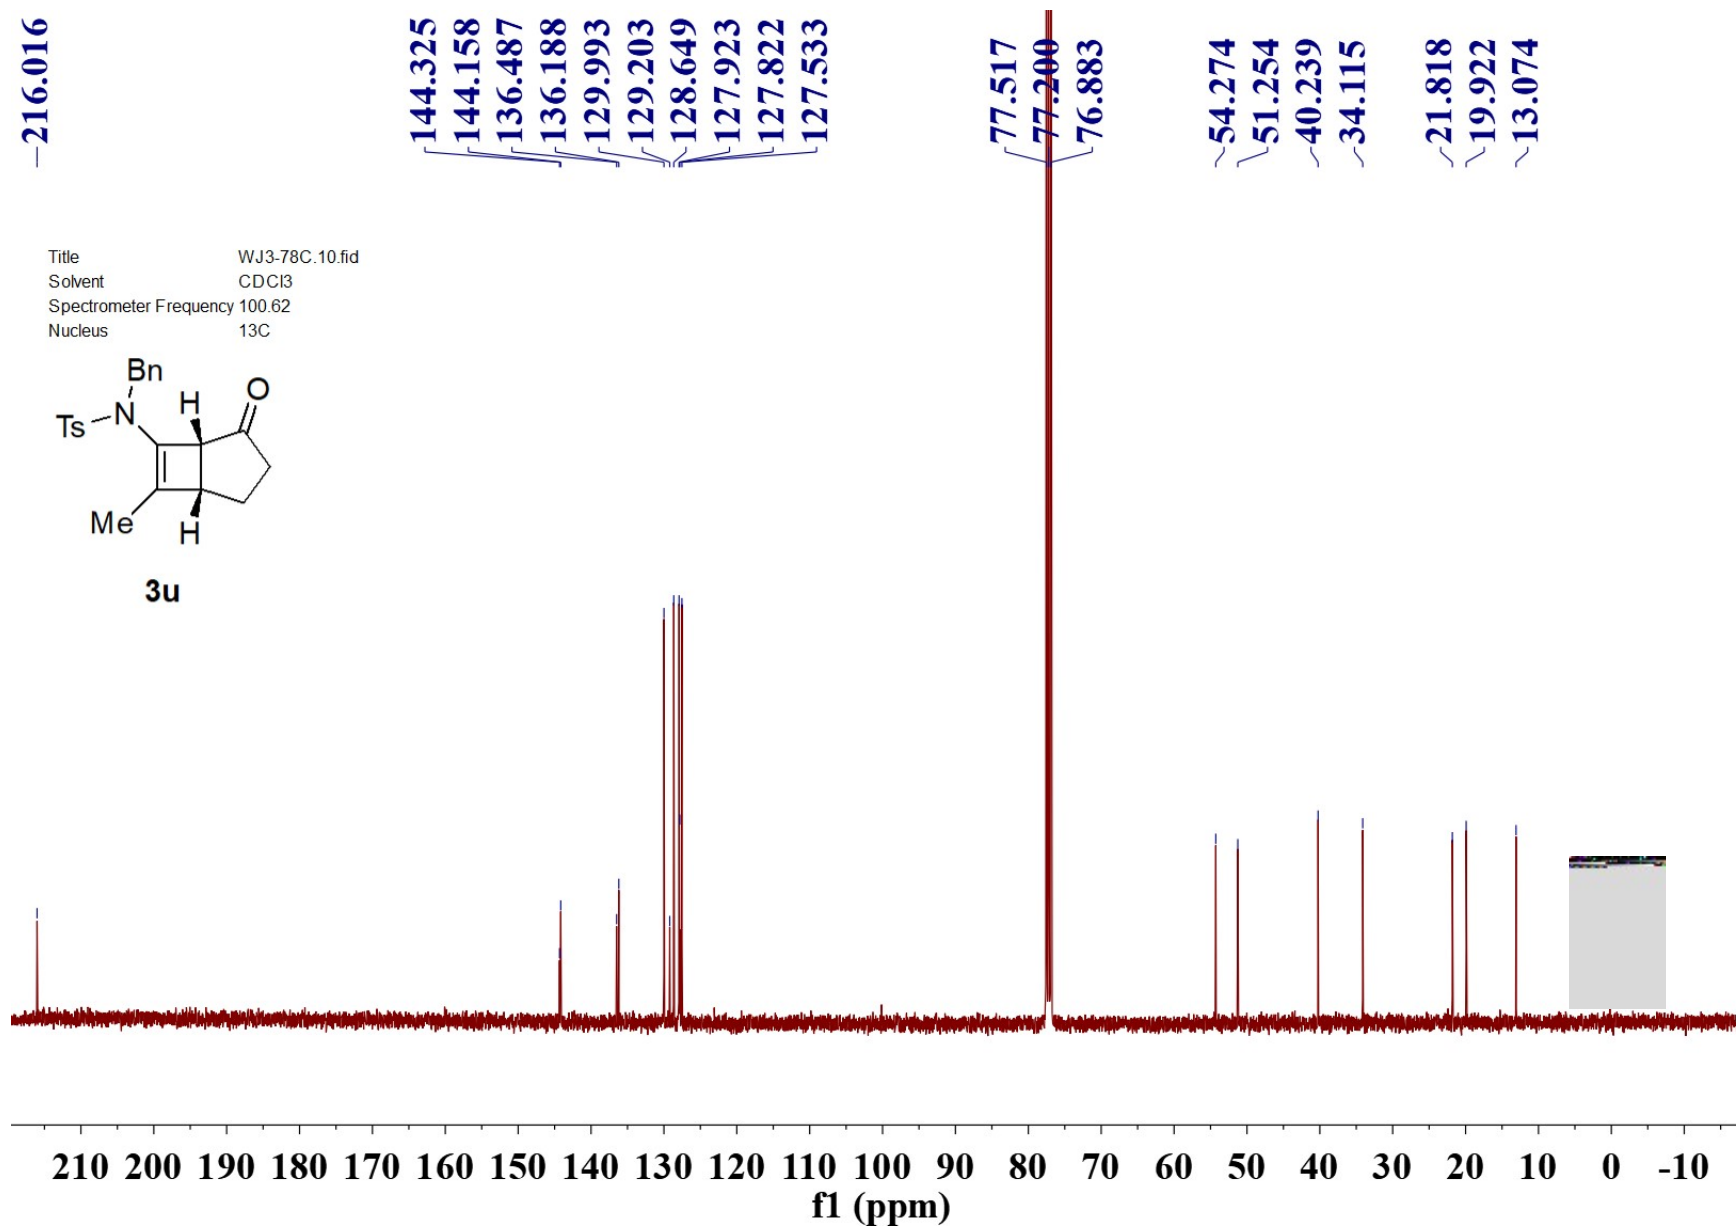

7.7390  
7.7183  
7.3485  
7.3284  
7.3006  
7.2970  
7.2830  
7.2639  
7.2547  
7.2359  
4.4751  
2.5336  
2.4551  
1.9264  
1.9240  
1.9163  
1.9041  
1.9018  
1.8961  
1.8937  
1.8735  
1.8714  
1.8478  
1.8439  
1.8400  
1.8264  
1.8224  
1.8186  
1.7999  
1.7823  
1.7783  
1.6291  
1.6244  
1.5920  
1.4363  
1.4279  
1.3843  
1.3539  
1.1401  
0.0001

Title WJ3-80.10.fid  
Solvent CDCl3  
Spectrometer Frequency 400.13  
Nucleus 1H

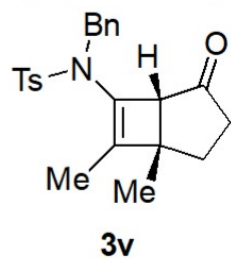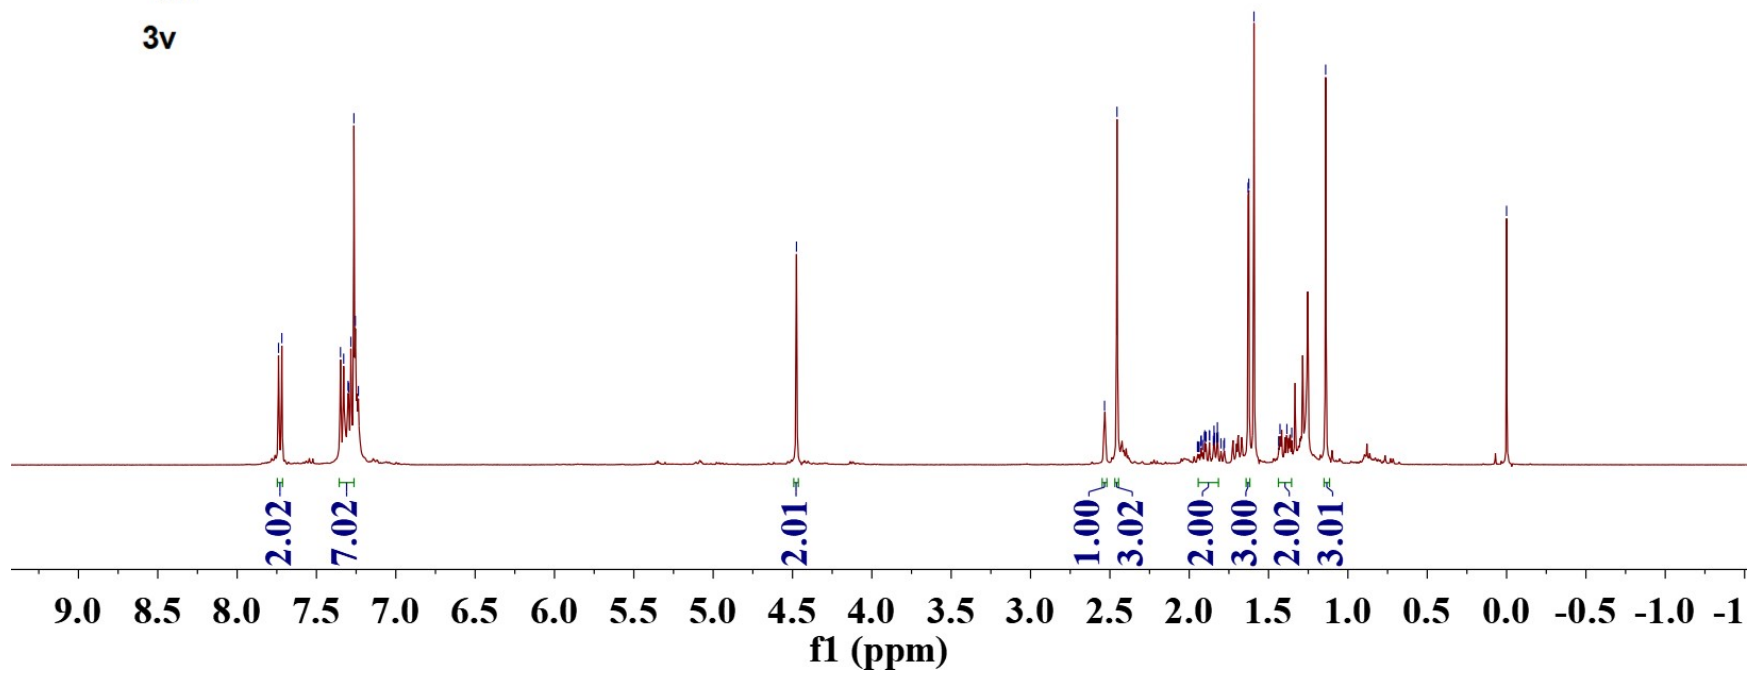

216.301

147.657  
144.143  
136.401  
136.118  
129.944  
128.617  
128.387  
127.974  
127.837  
127.564

77.518  
77.200  
76.884

61.059  
51.365  
46.205  
35.961  
26.895  
21.810  
21.349  
10.439

Title WJ3-80.10.fid  
Solvent CDCl3  
Spectrometer Frequency 100.62  
Nucleus 13C

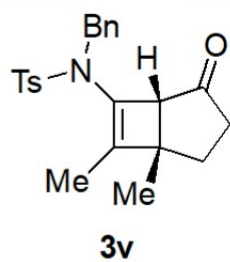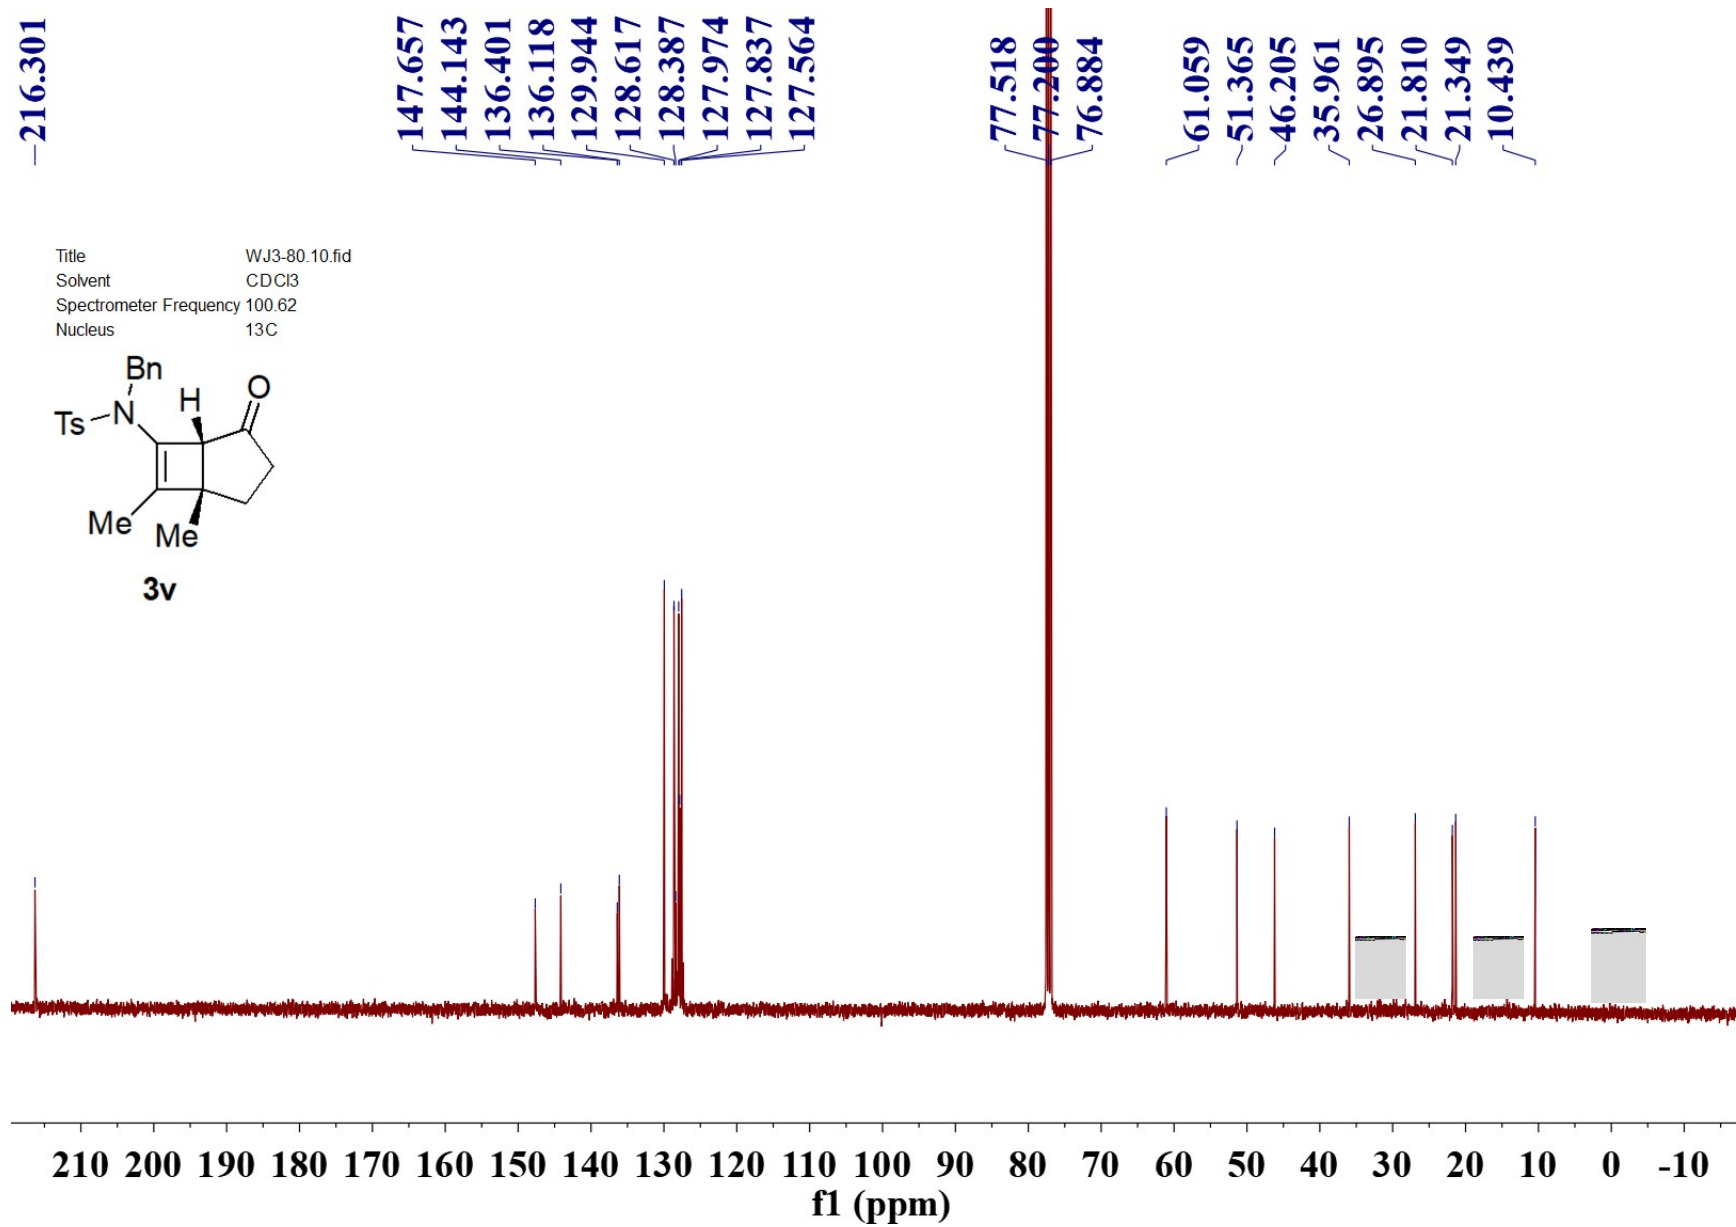

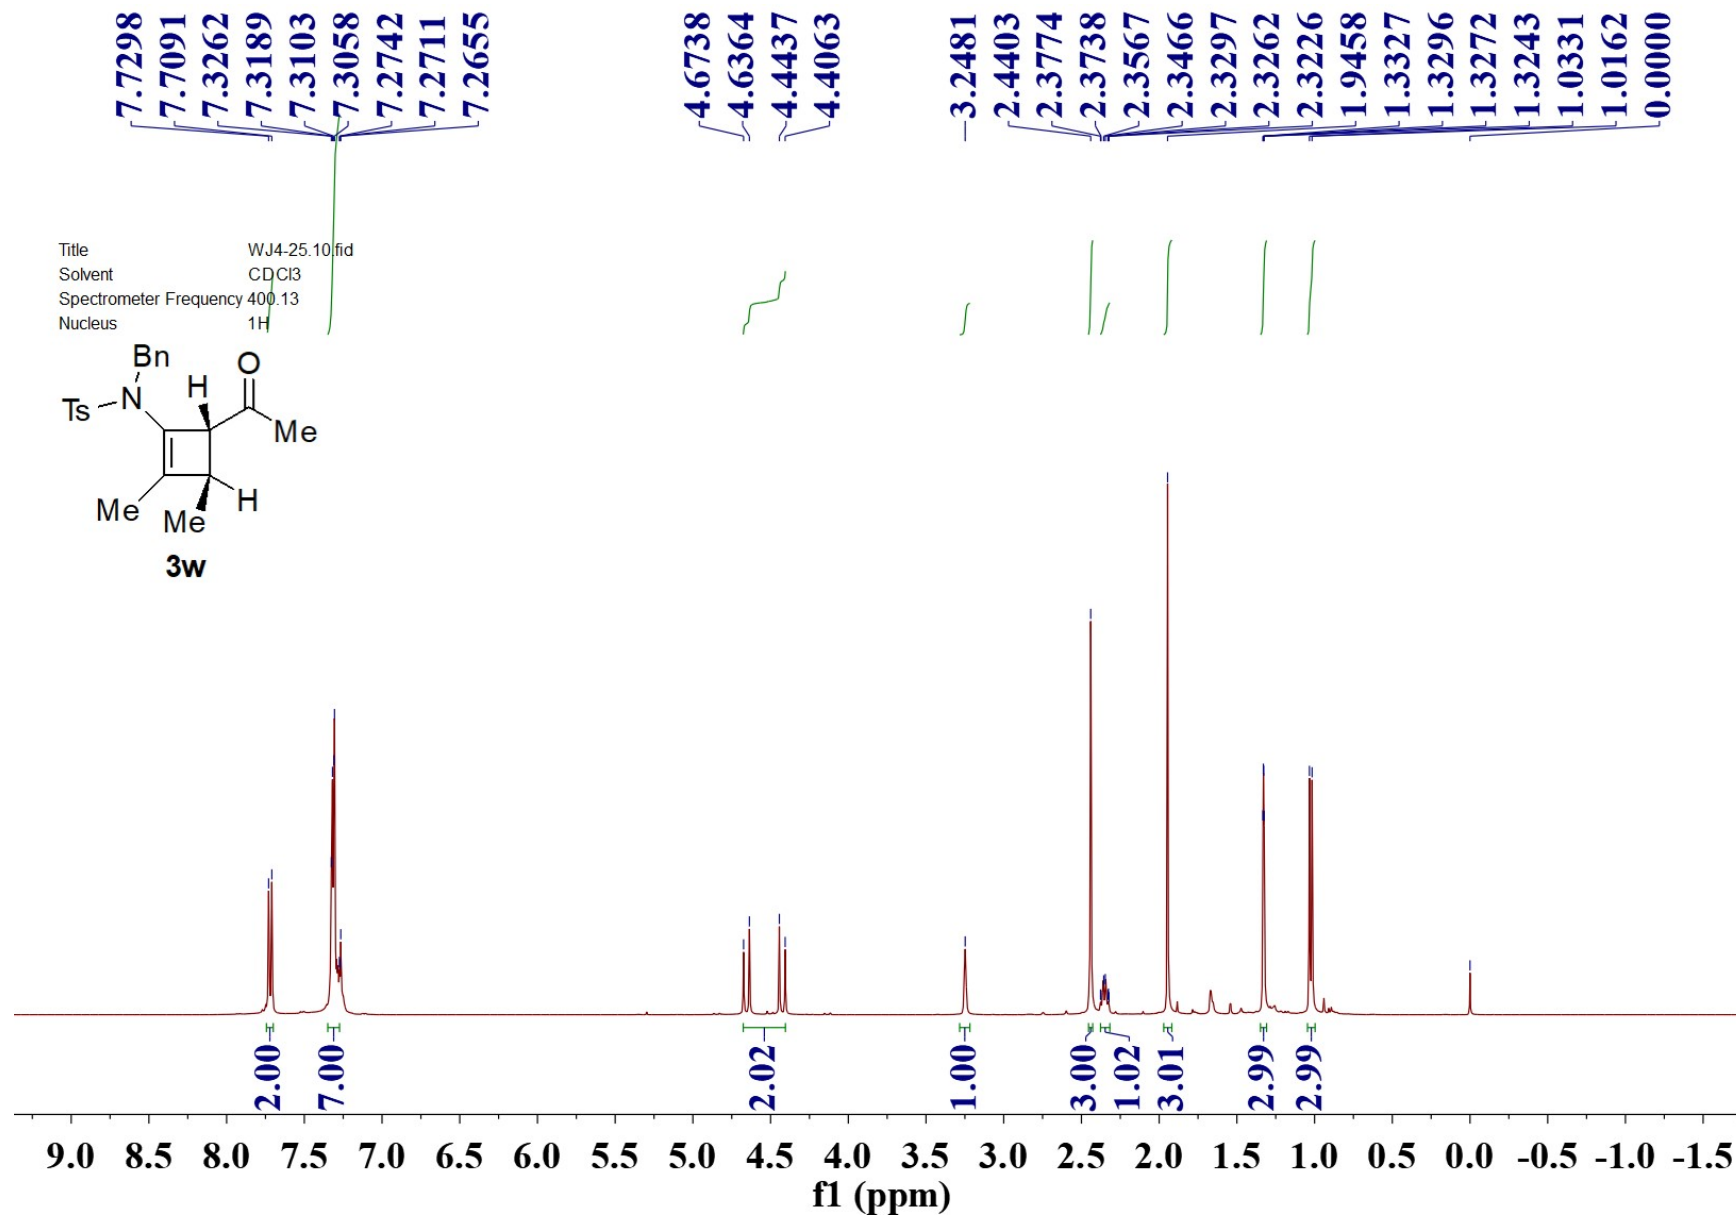

208.081

143.917  
140.359  
136.495  
129.821  
128.806  
128.603  
128.098  
127.859  
127.445

77.518  
77.200  
76.883  
62.960  
52.088

38.052  
28.603  
21.761  
16.907  
12.094

Title WJ4-25.10.fid  
Solvent CDCl3  
Spectrometer Frequency 100.62  
Nucleus 13C

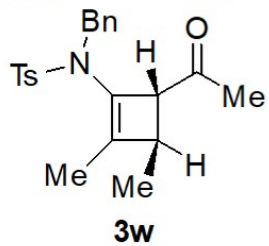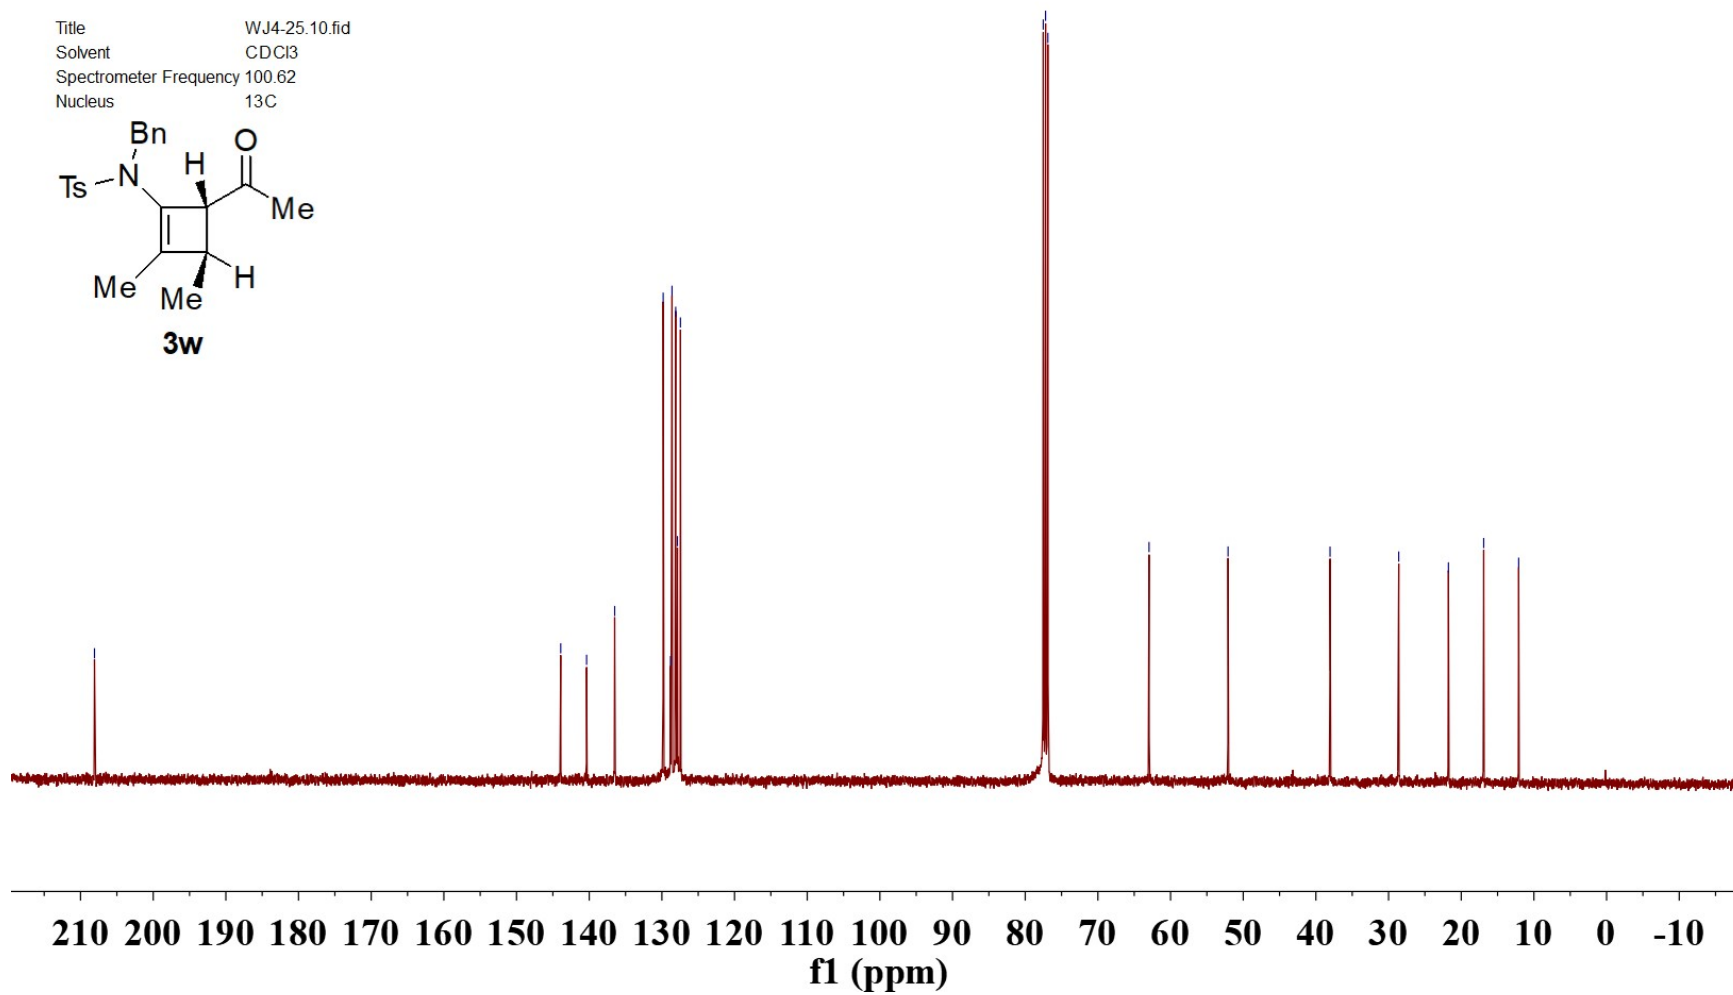



Title WJ4-35-2.10.fid  
Solvent CDCl3  
Spectrometer Frequency 400.13  
Nucleus 1H

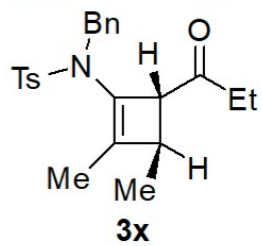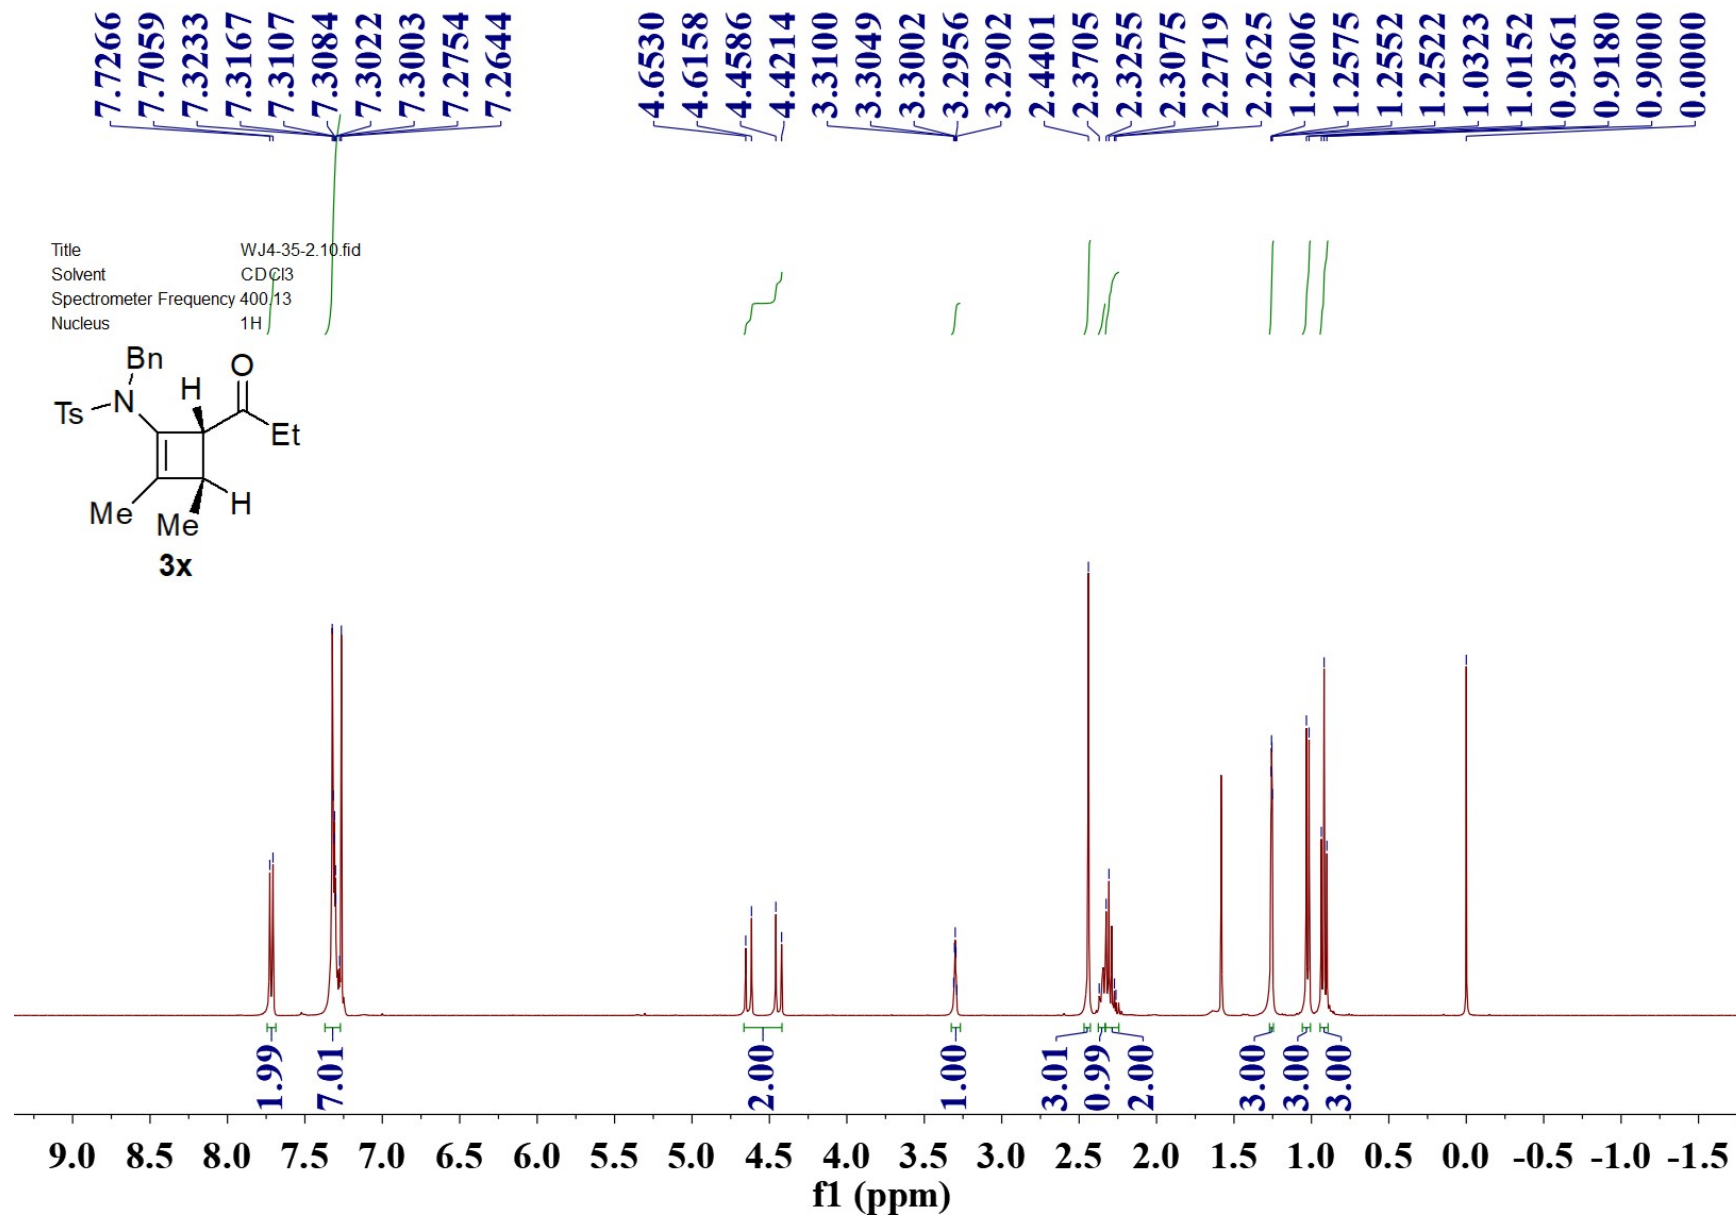

210.146

143.825  
140.387  
136.559  
136.467  
129.770  
128.736  
128.554  
128.166  
127.781  
127.426

77.520  
77.200  
76.882

61.944  
52.192

38.187  
35.139

21.729  
16.925  
11.960  
7.559

Title WJ4-35-2.10.fid  
Solvent CDCl3  
Spectrometer Frequency 100.62  
Nucleus 13C

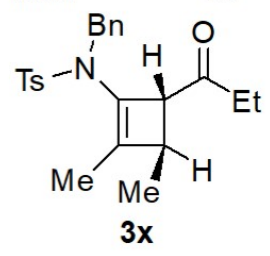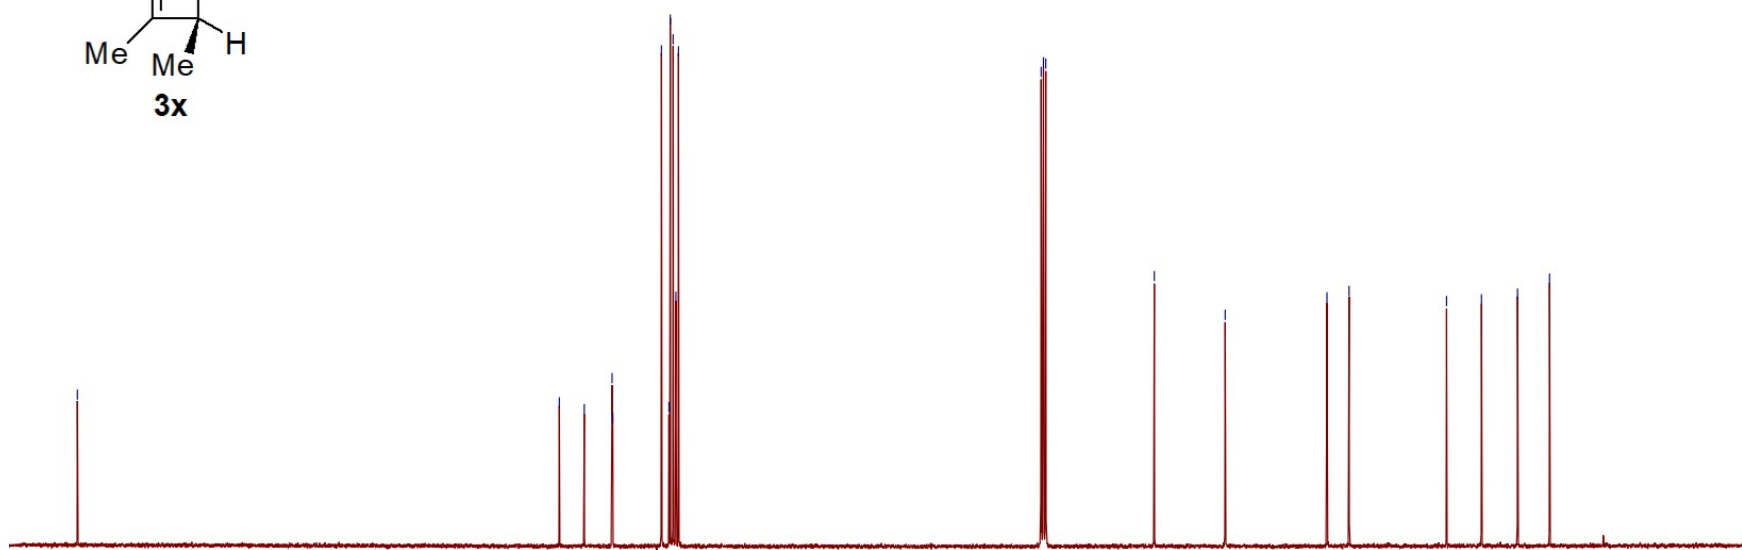

210 200 190 180 170 160 150 140 130 120 110 100 90 80 70 60 50 40 30 20 10 0 -10  
f1 (ppm)

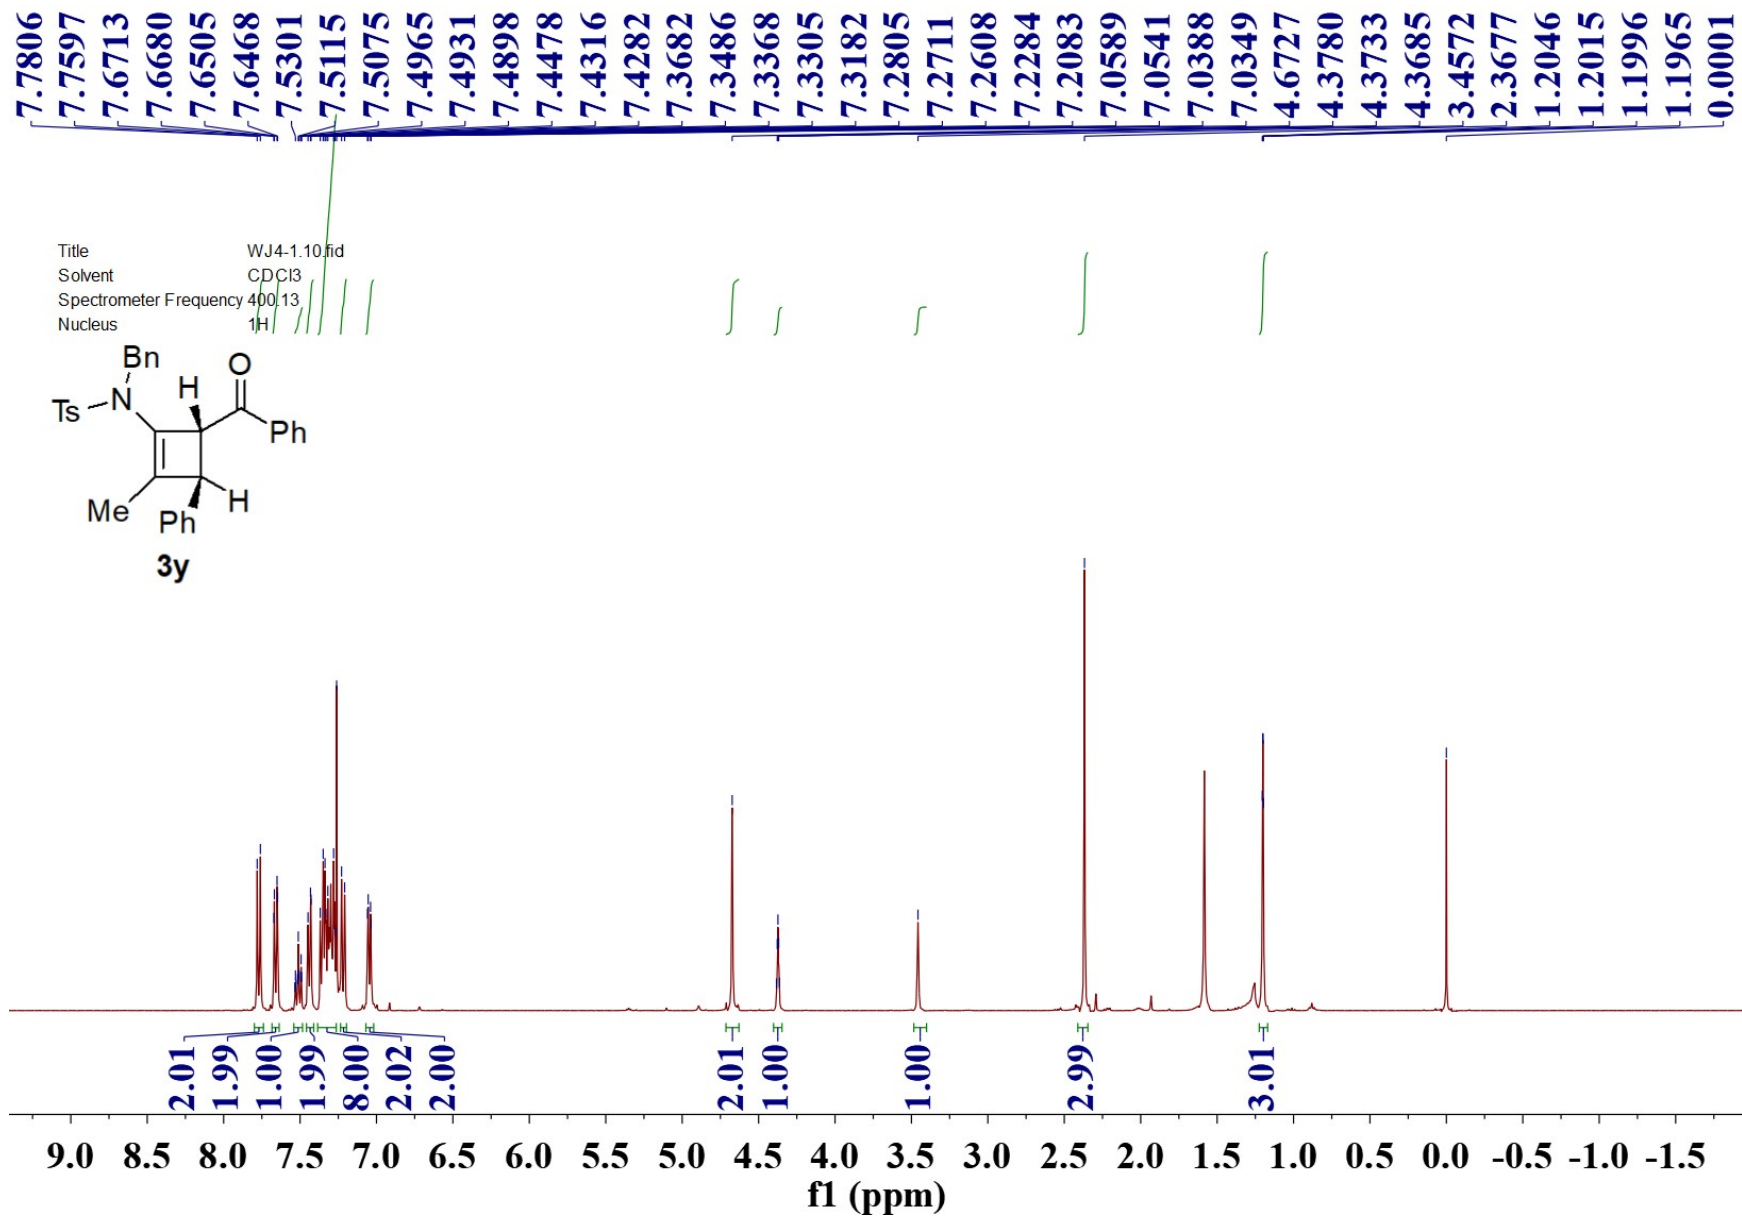

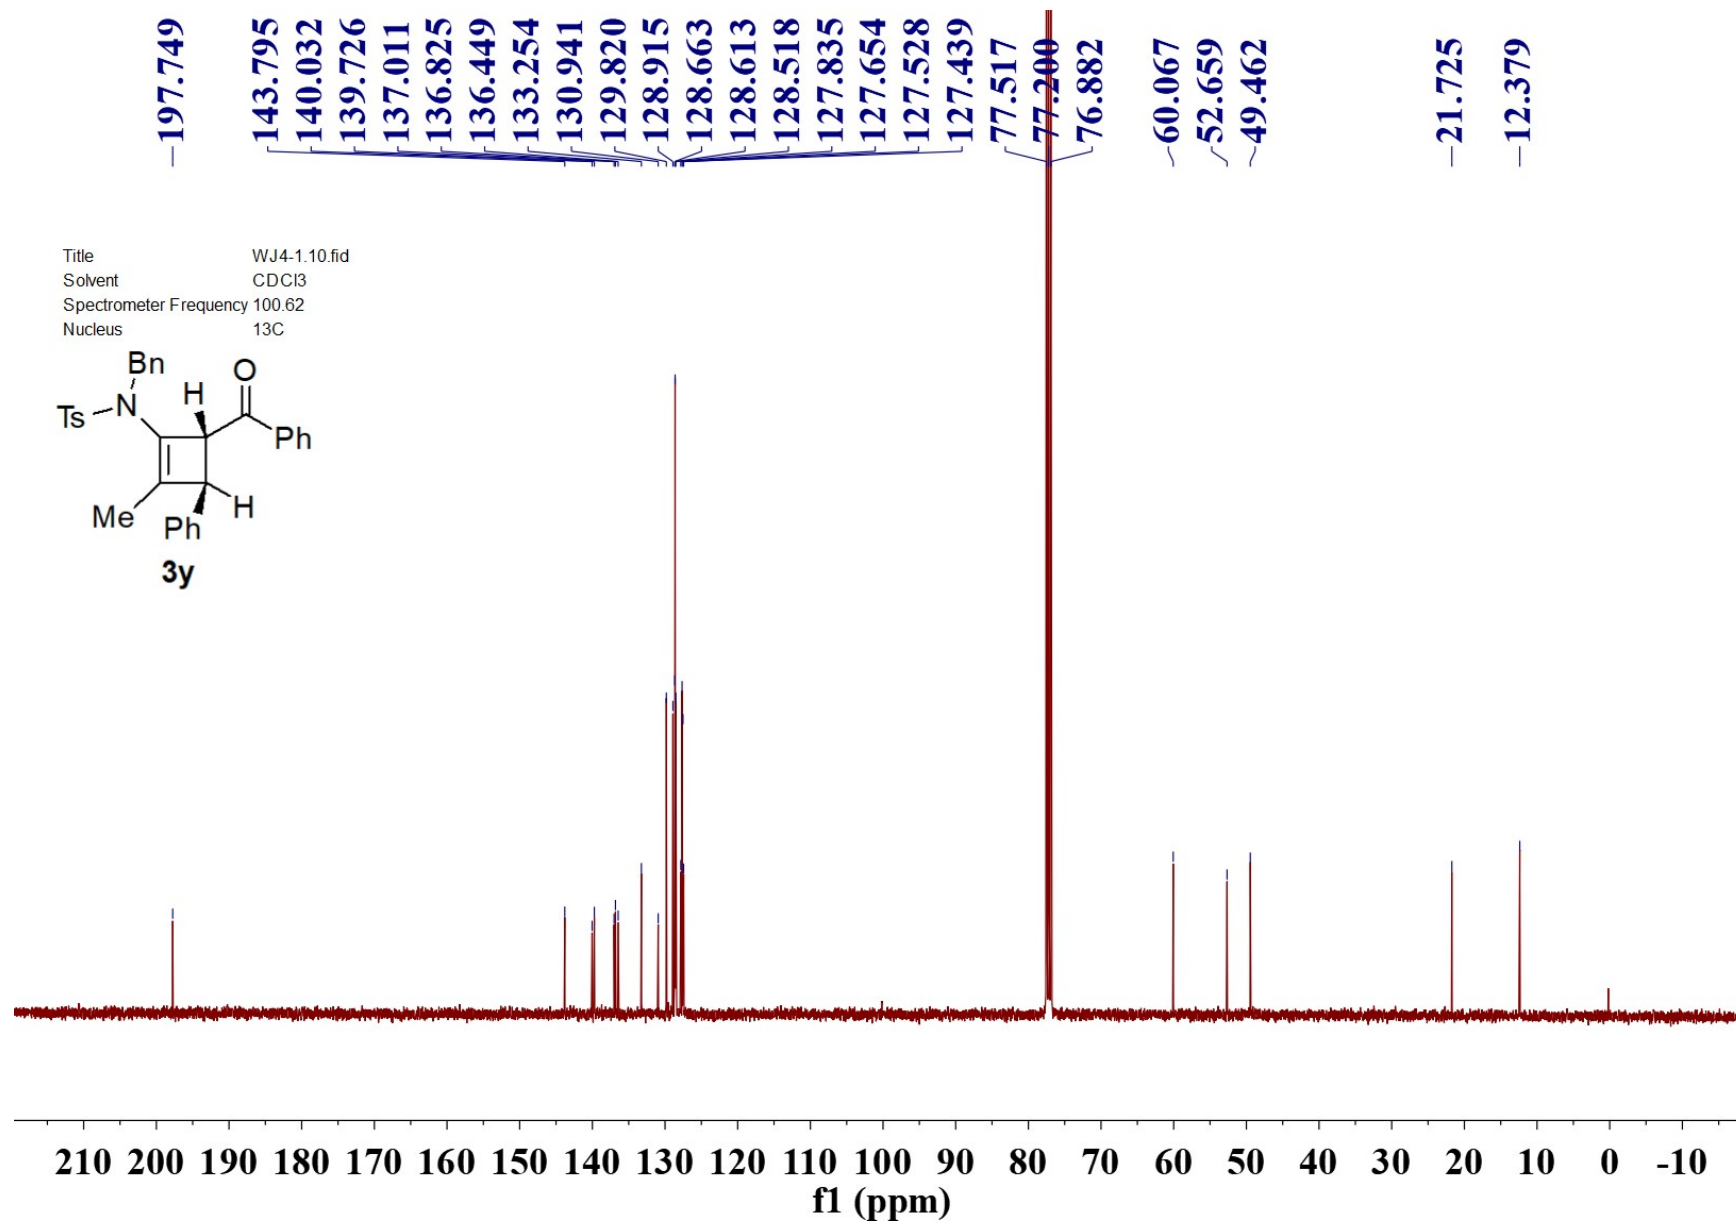

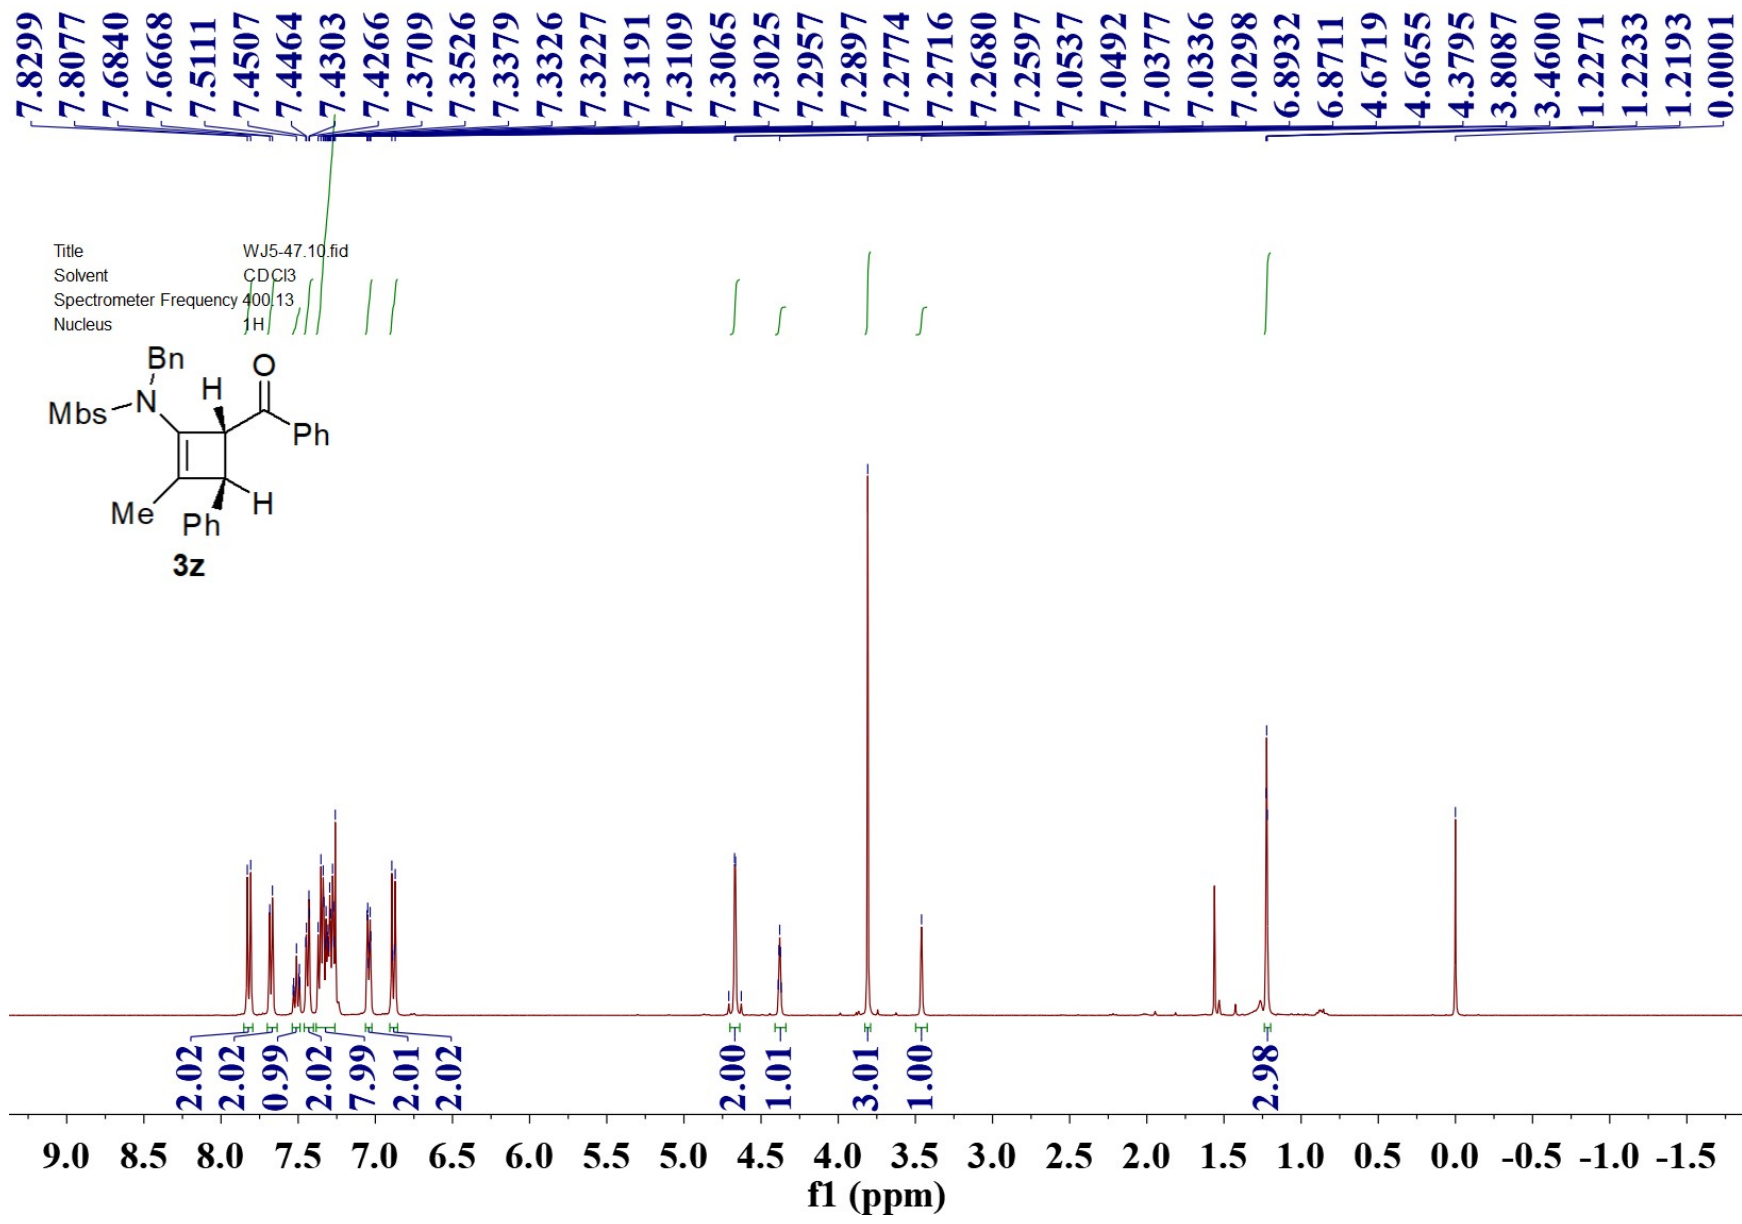

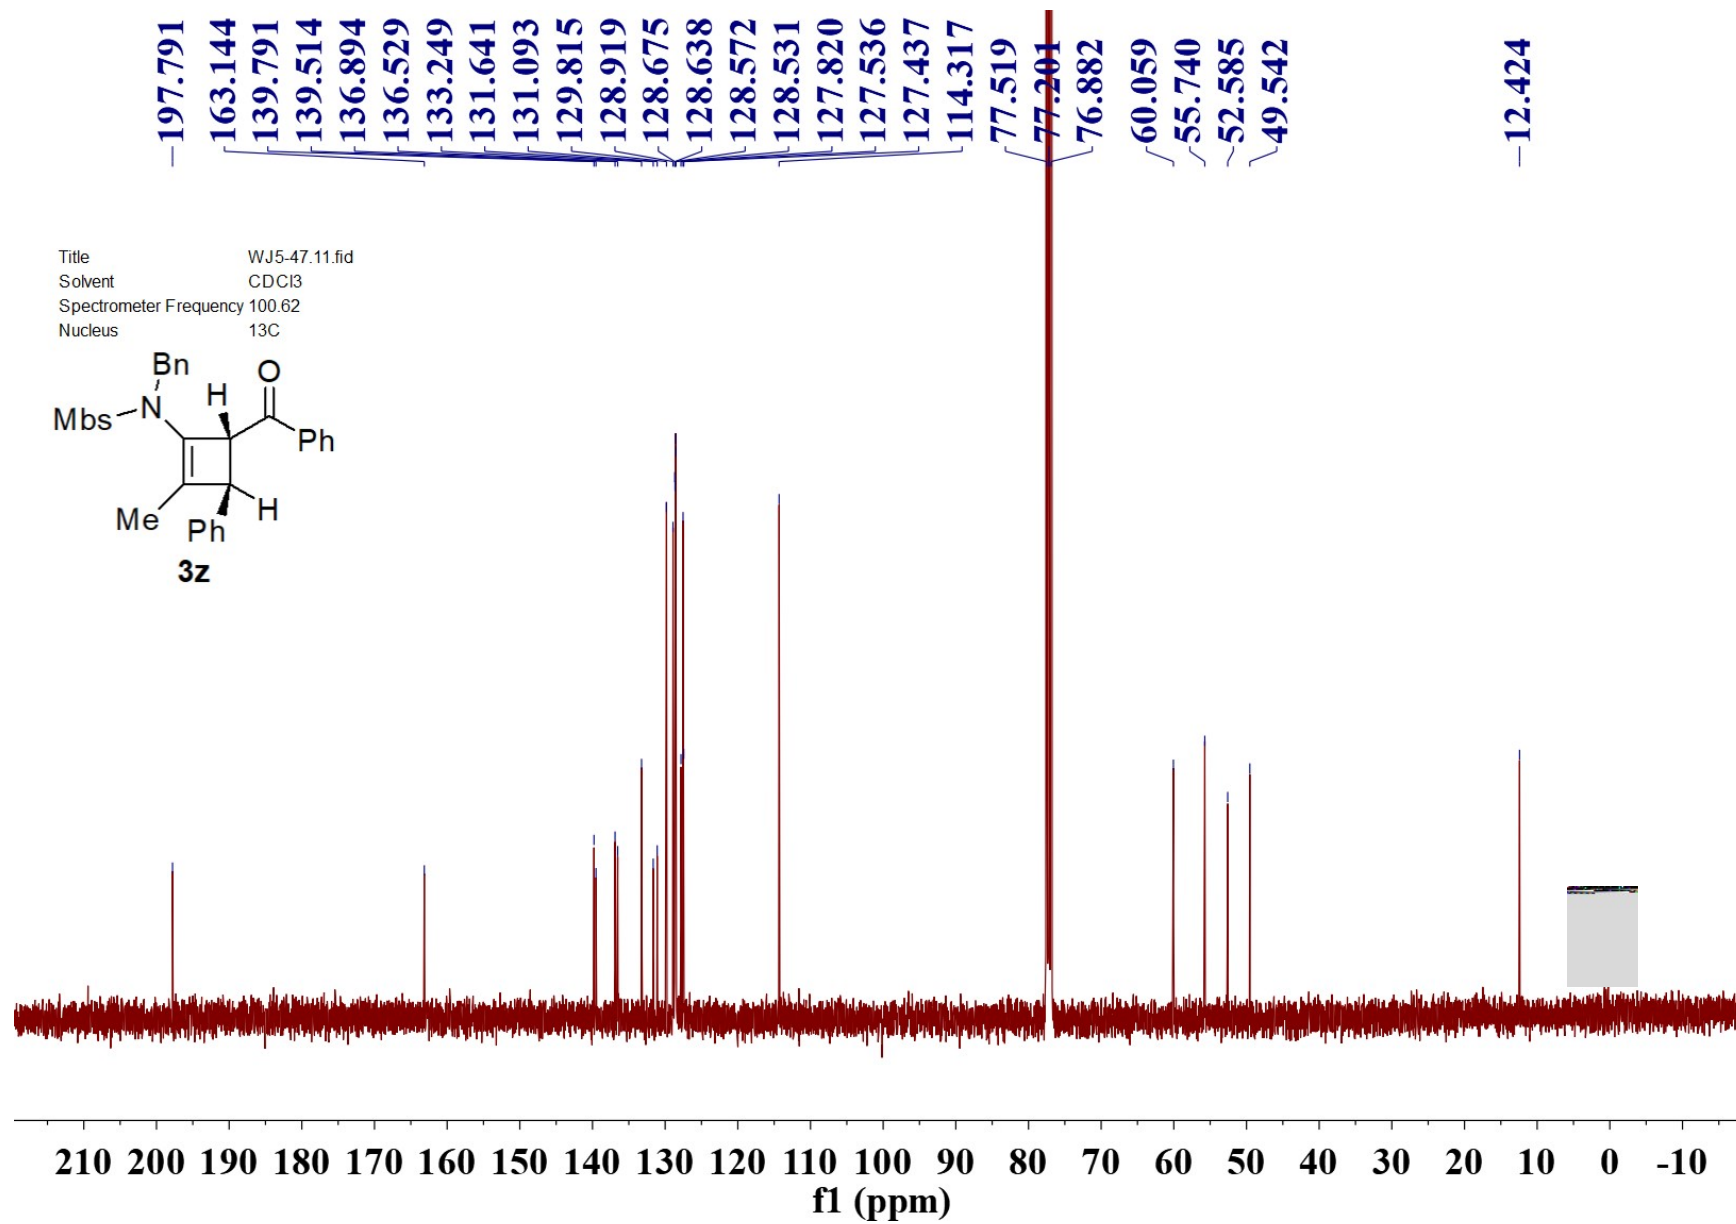



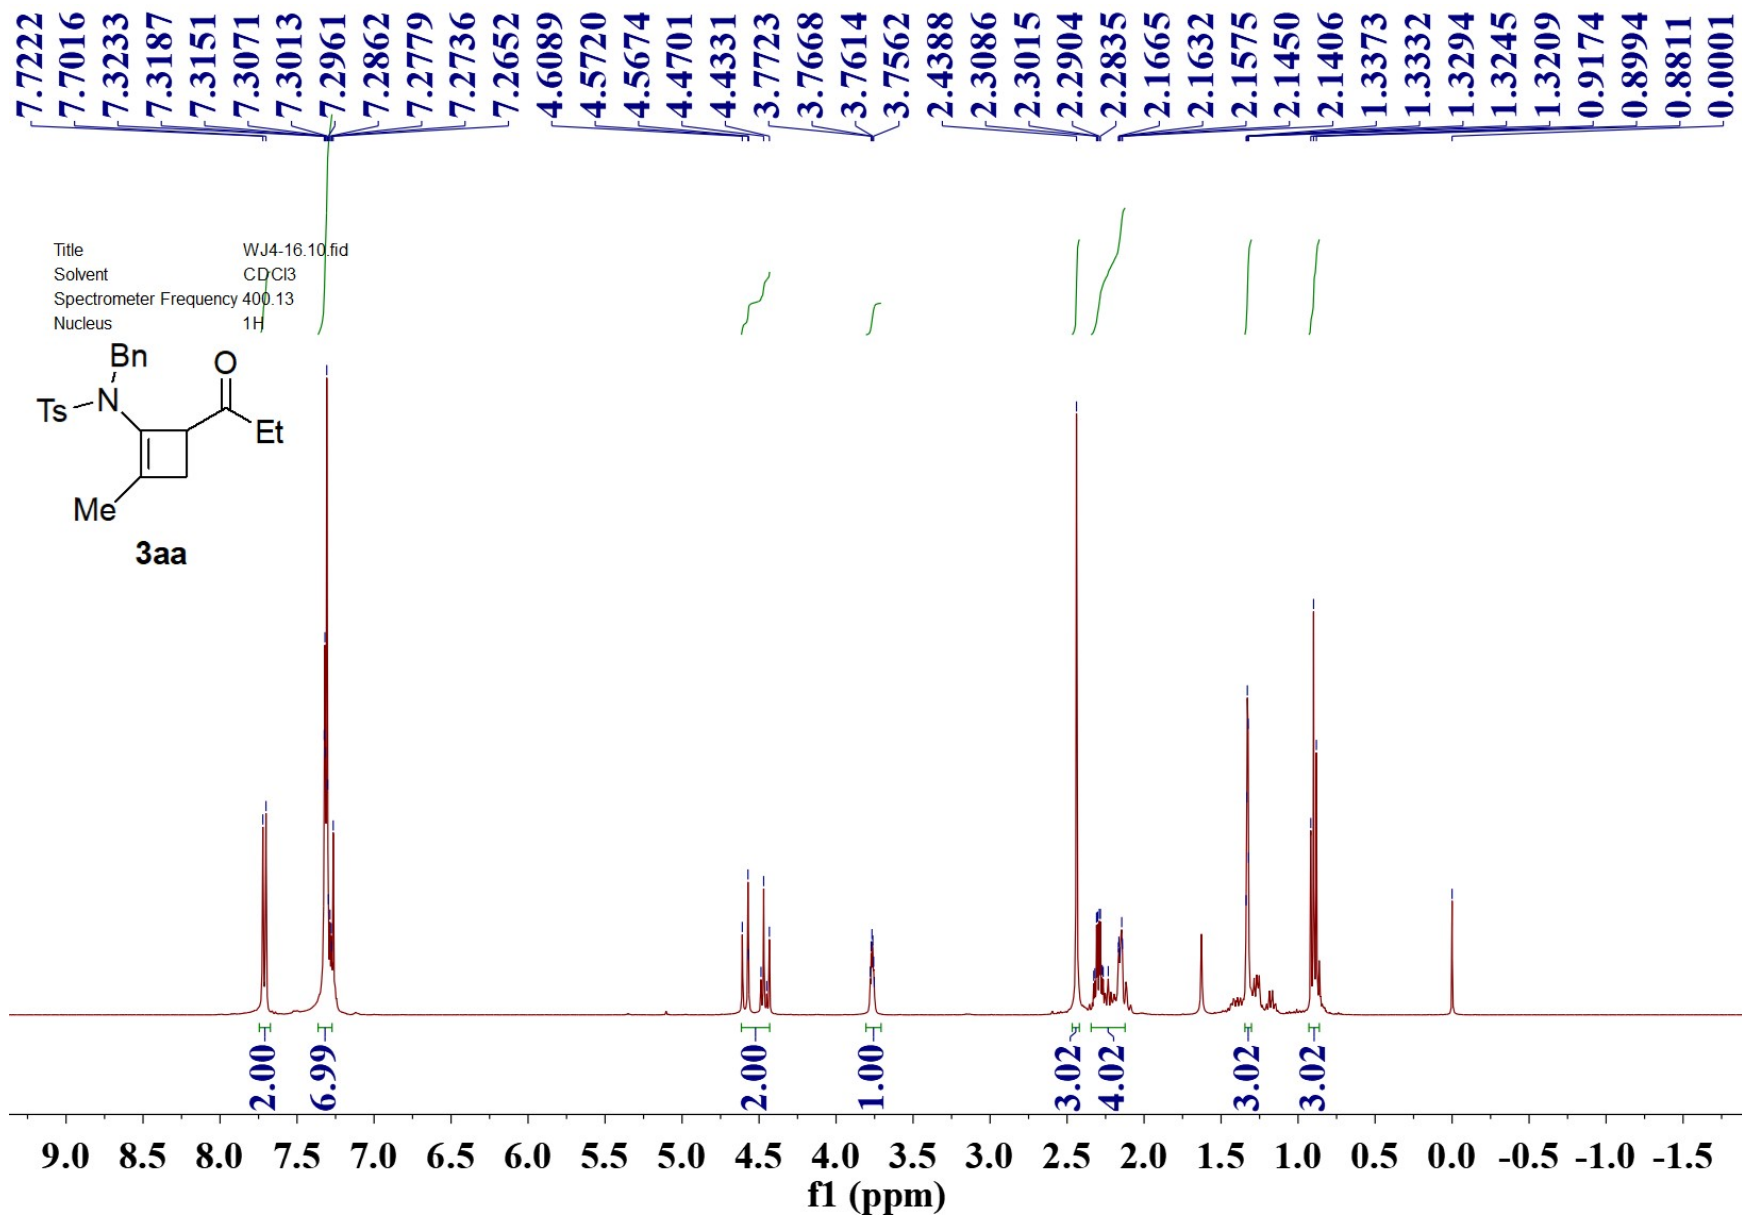

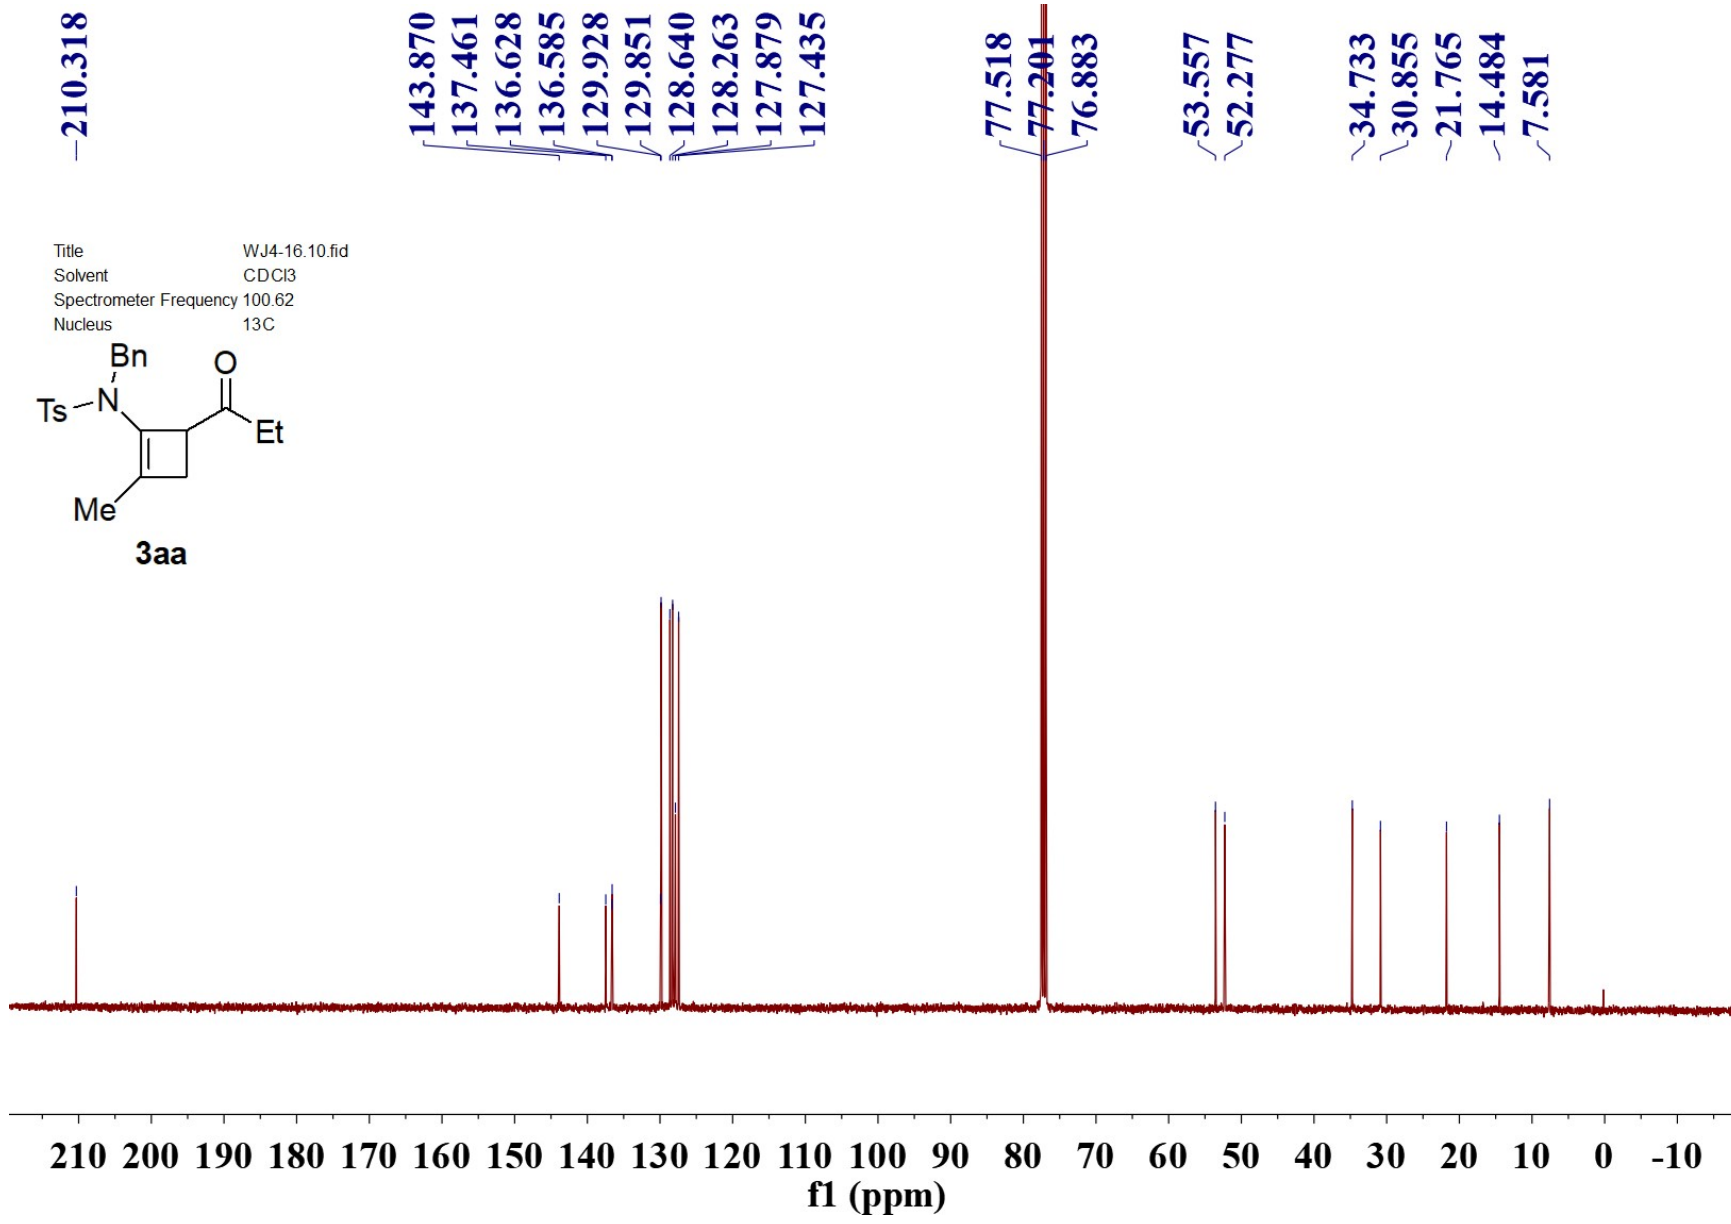

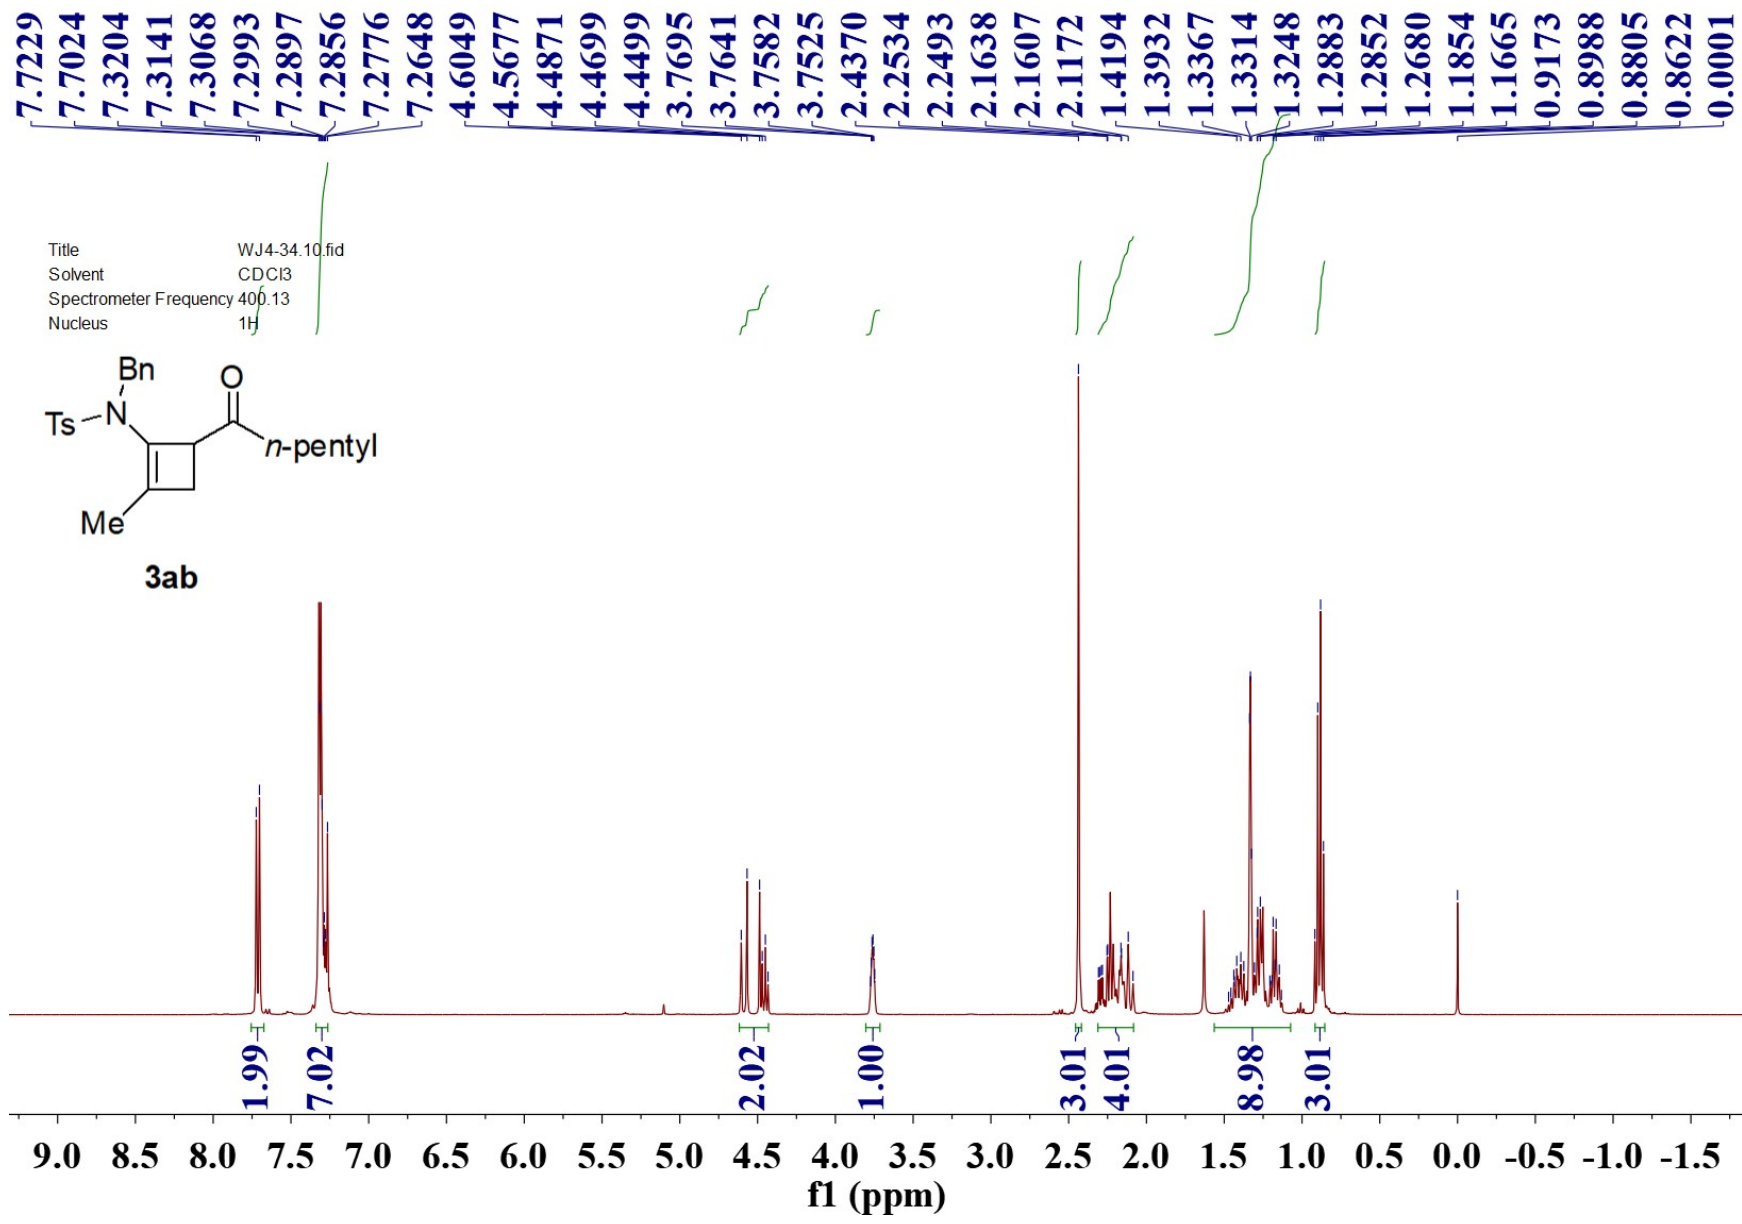

-210.087

143.833  
137.188  
136.746  
136.657  
129.853  
128.626  
128.267  
127.852  
127.435

77.518  
77.201  
76.883

53.619  
52.208  
41.499  
31.547  
30.946  
23.208  
22.689  
21.760  
14.452  
14.167

Title WJ4-34.10.fid  
Solvent CDCl3  
Spectrometer Frequency 100.62  
Nucleus 13C

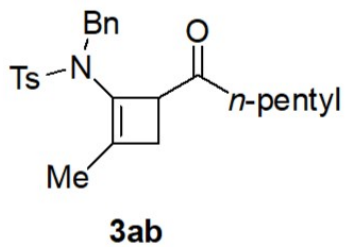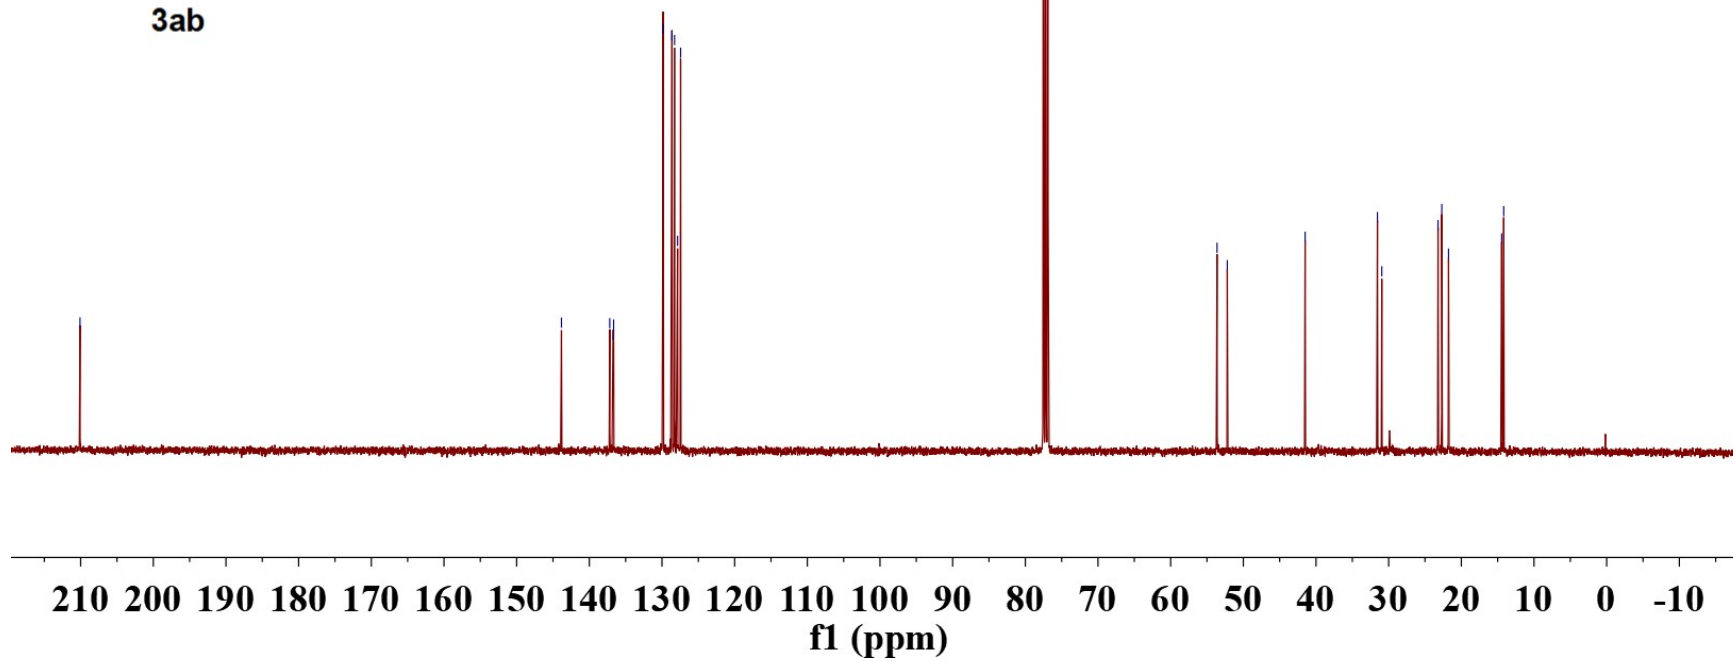

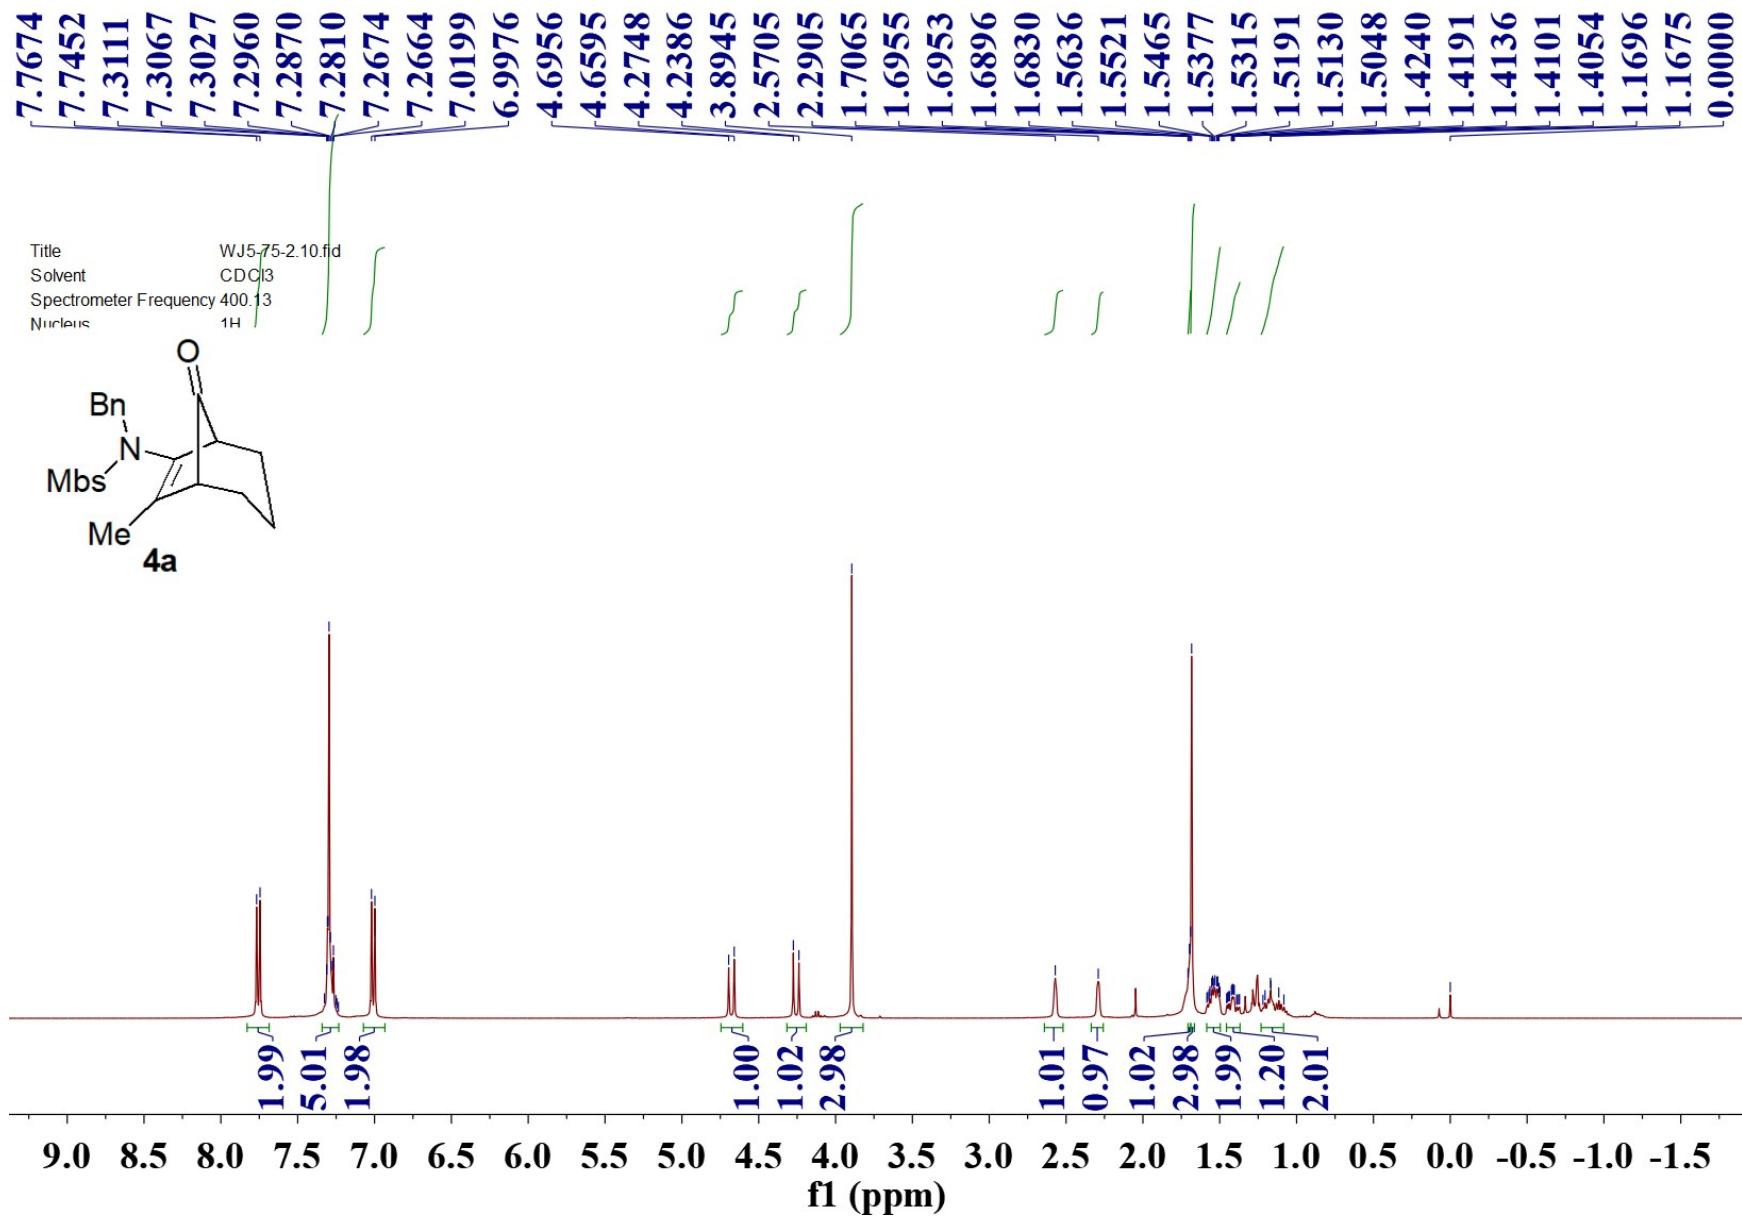

213.421

163.327  
139.910  
136.216  
131.501  
129.530  
128.661  
128.273  
128.116  
114.635

77.519  
77.201  
76.883  
55.845  
55.311  
52.856  
50.840

29.194  
27.565  
17.223  
13.553

Title WJ5-75-2.11.fid  
Solvent CDCl3  
Spectrometer Frequency 100.62  
Nucleus 13C

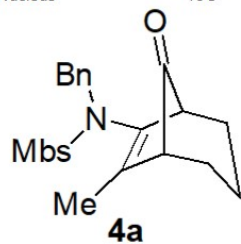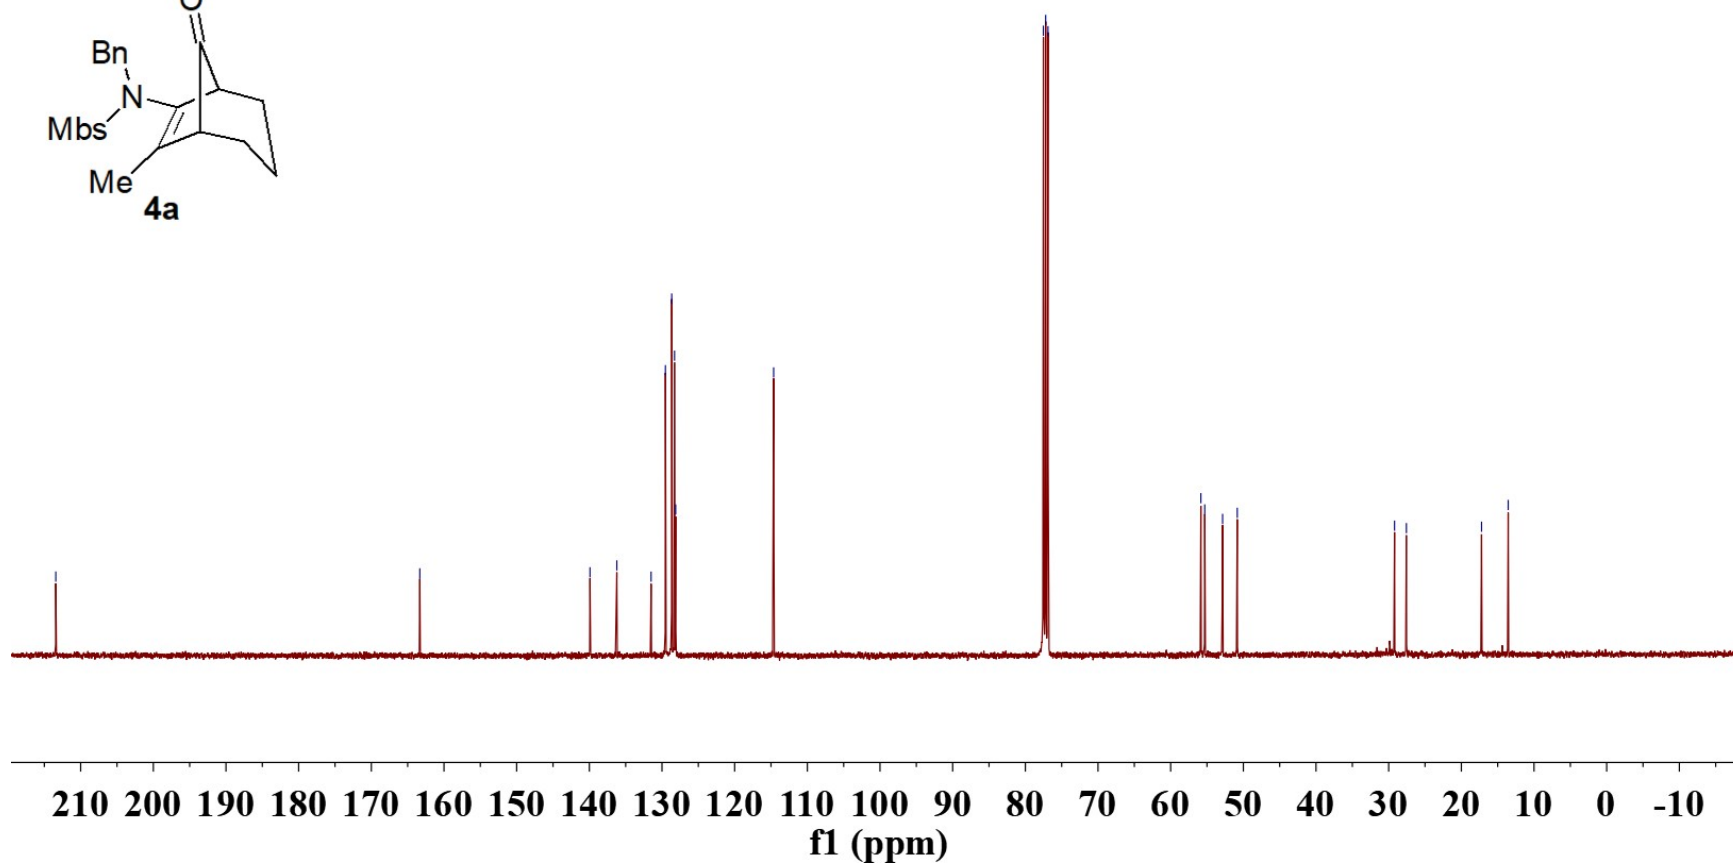



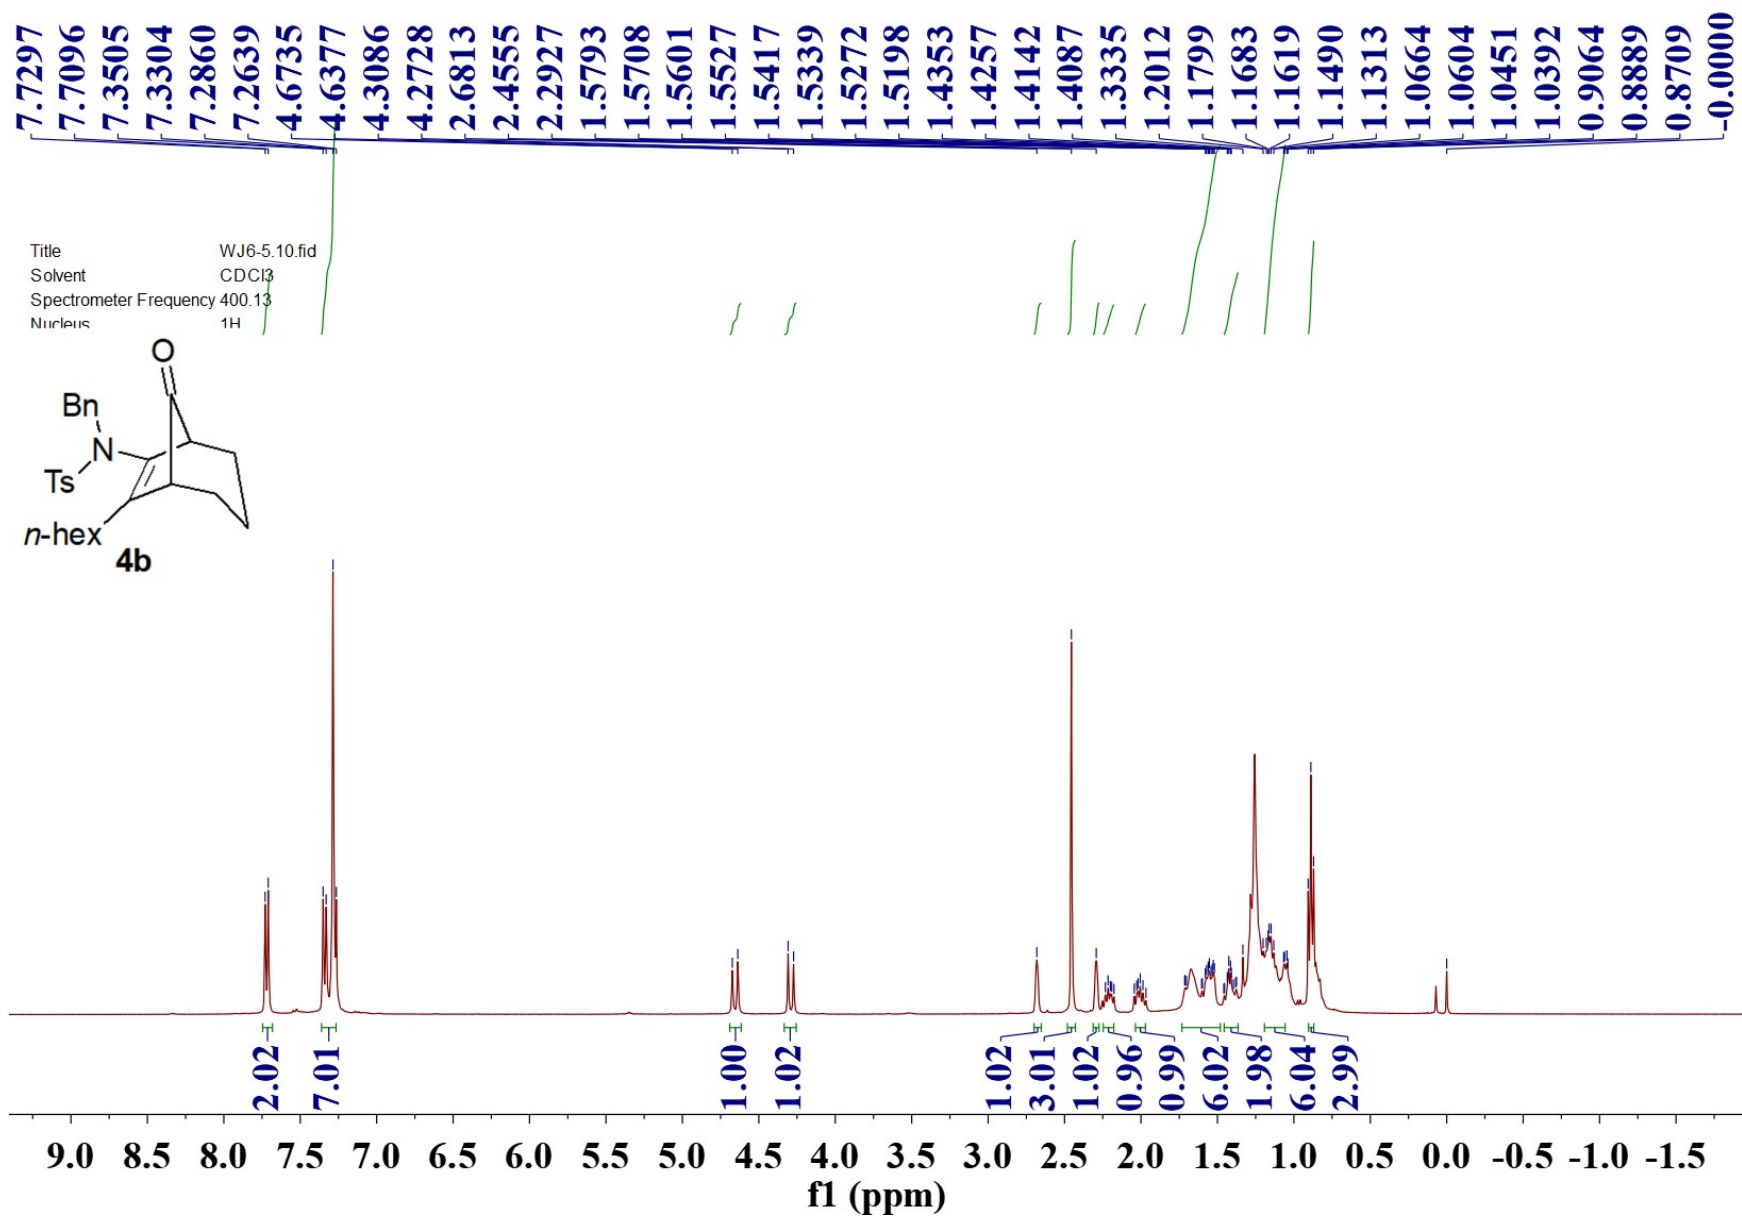

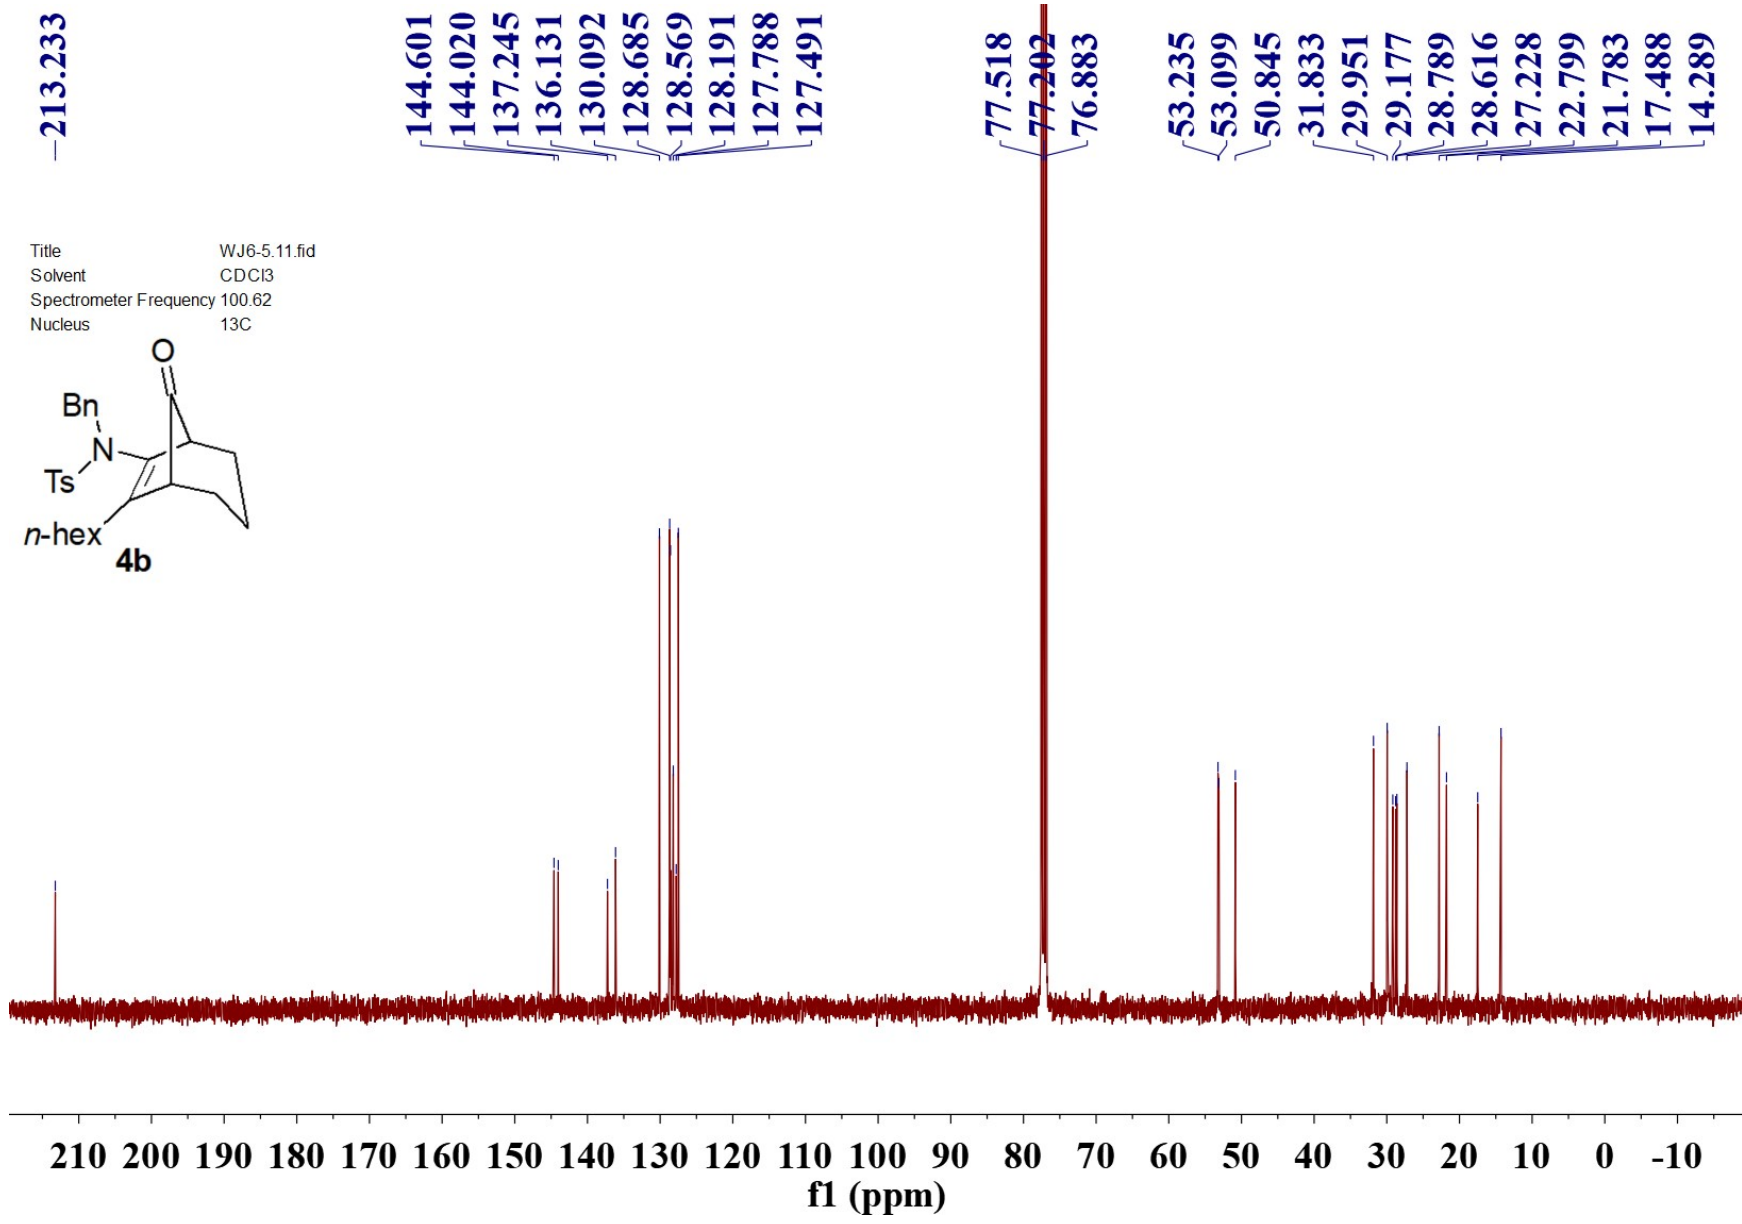

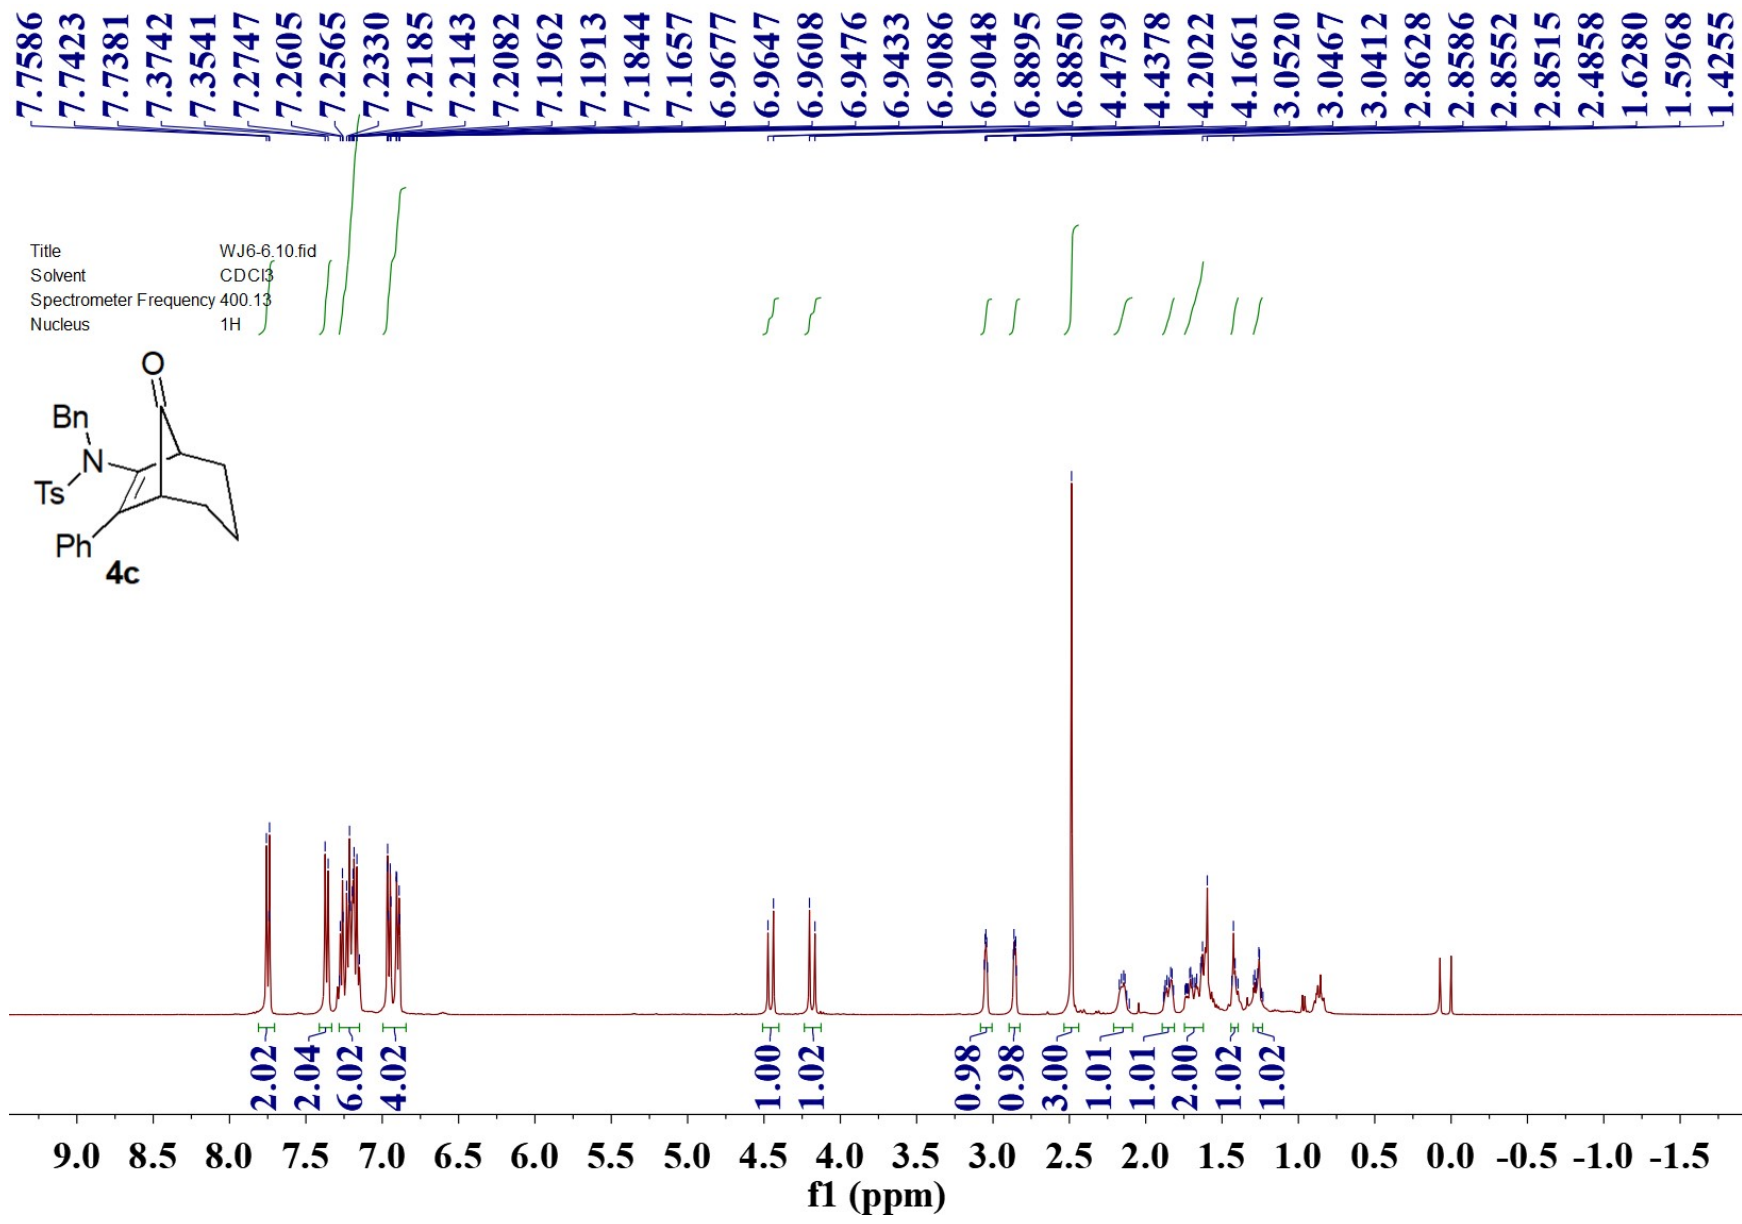

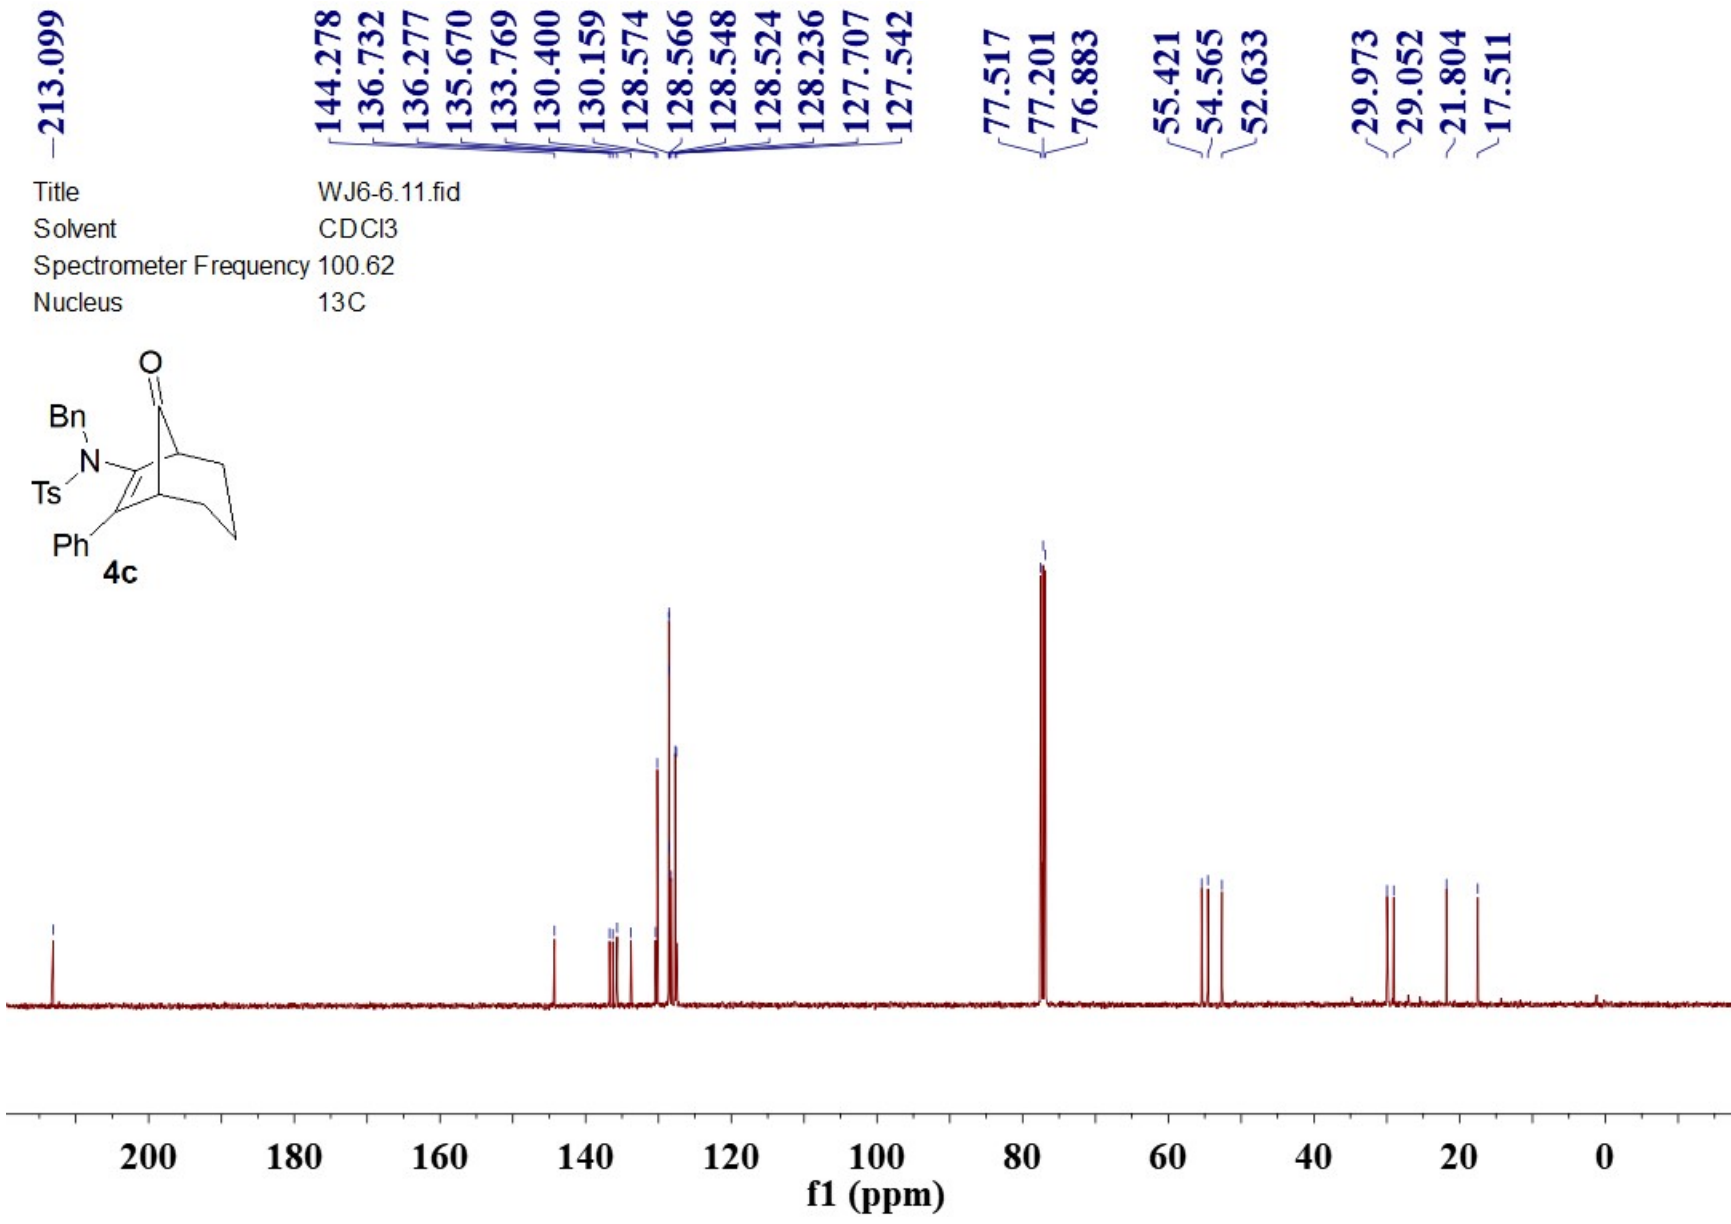

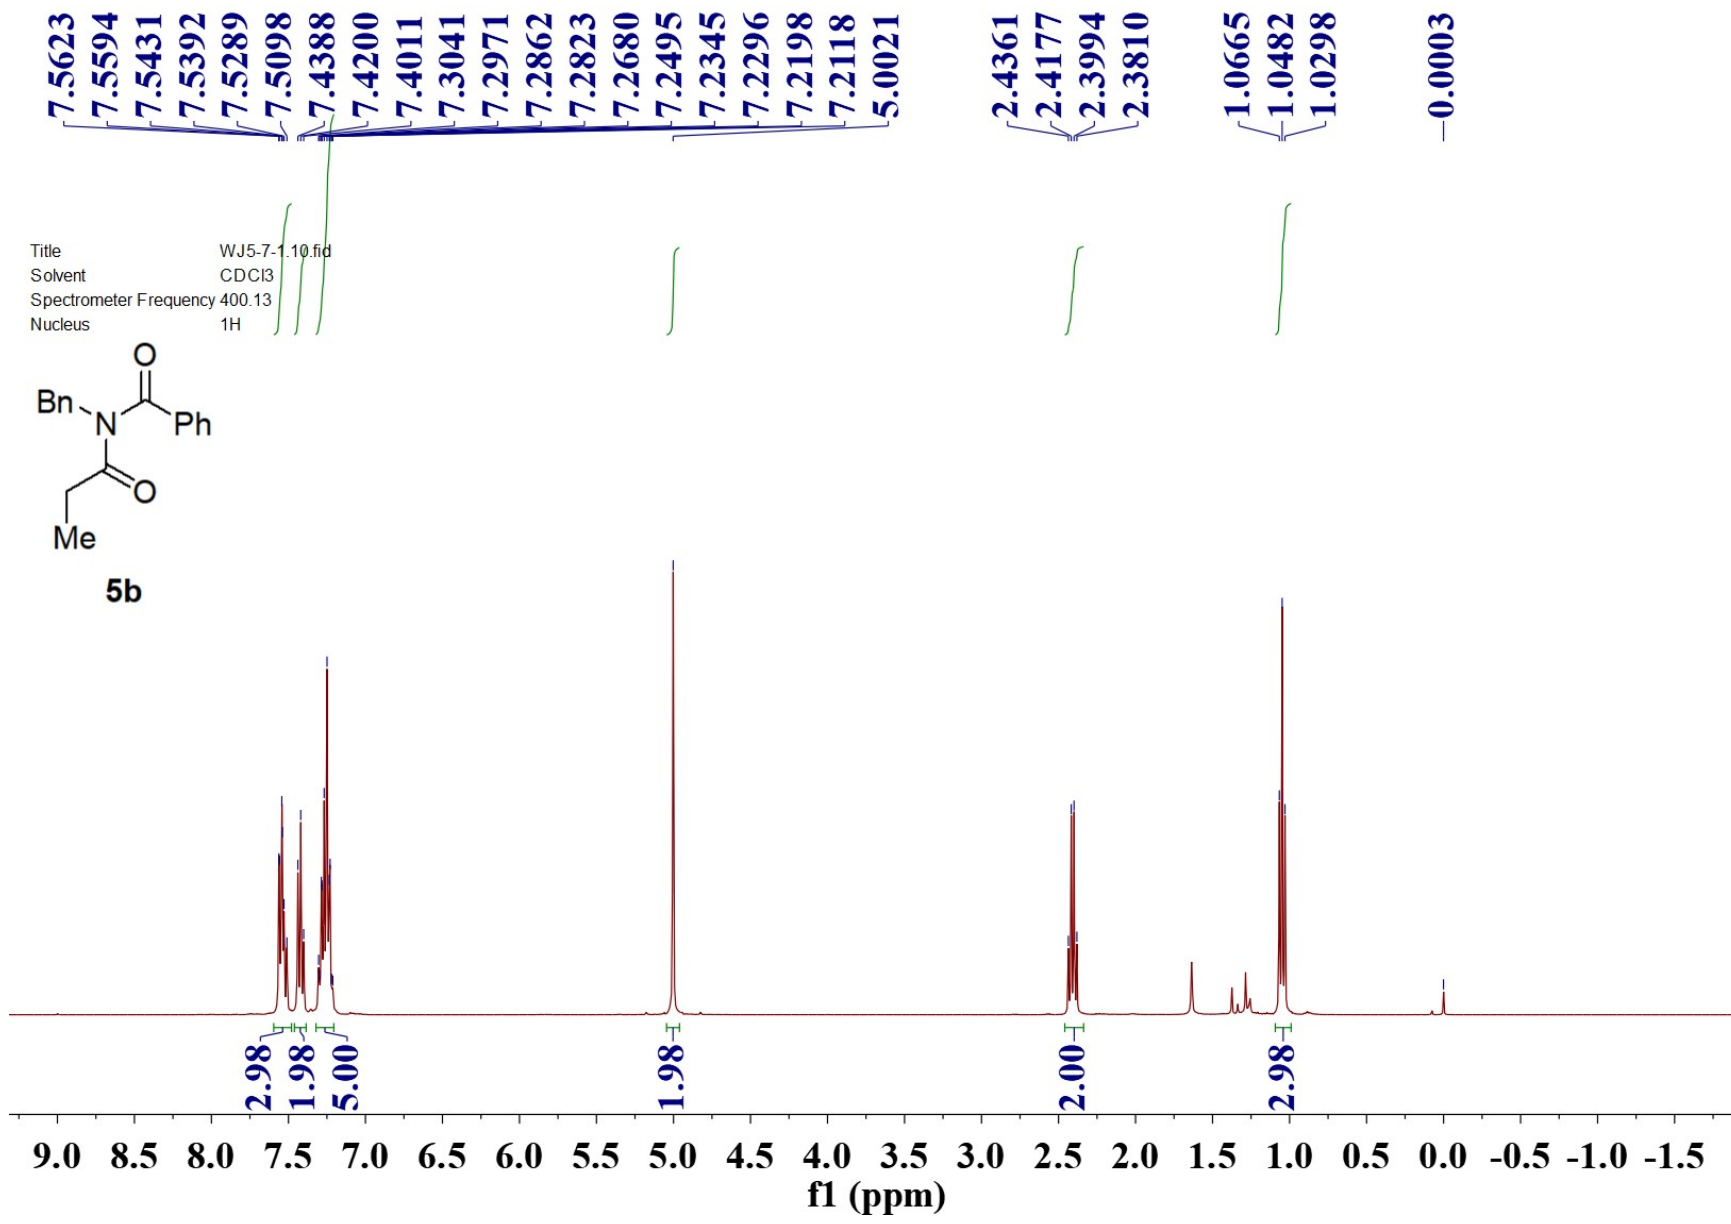

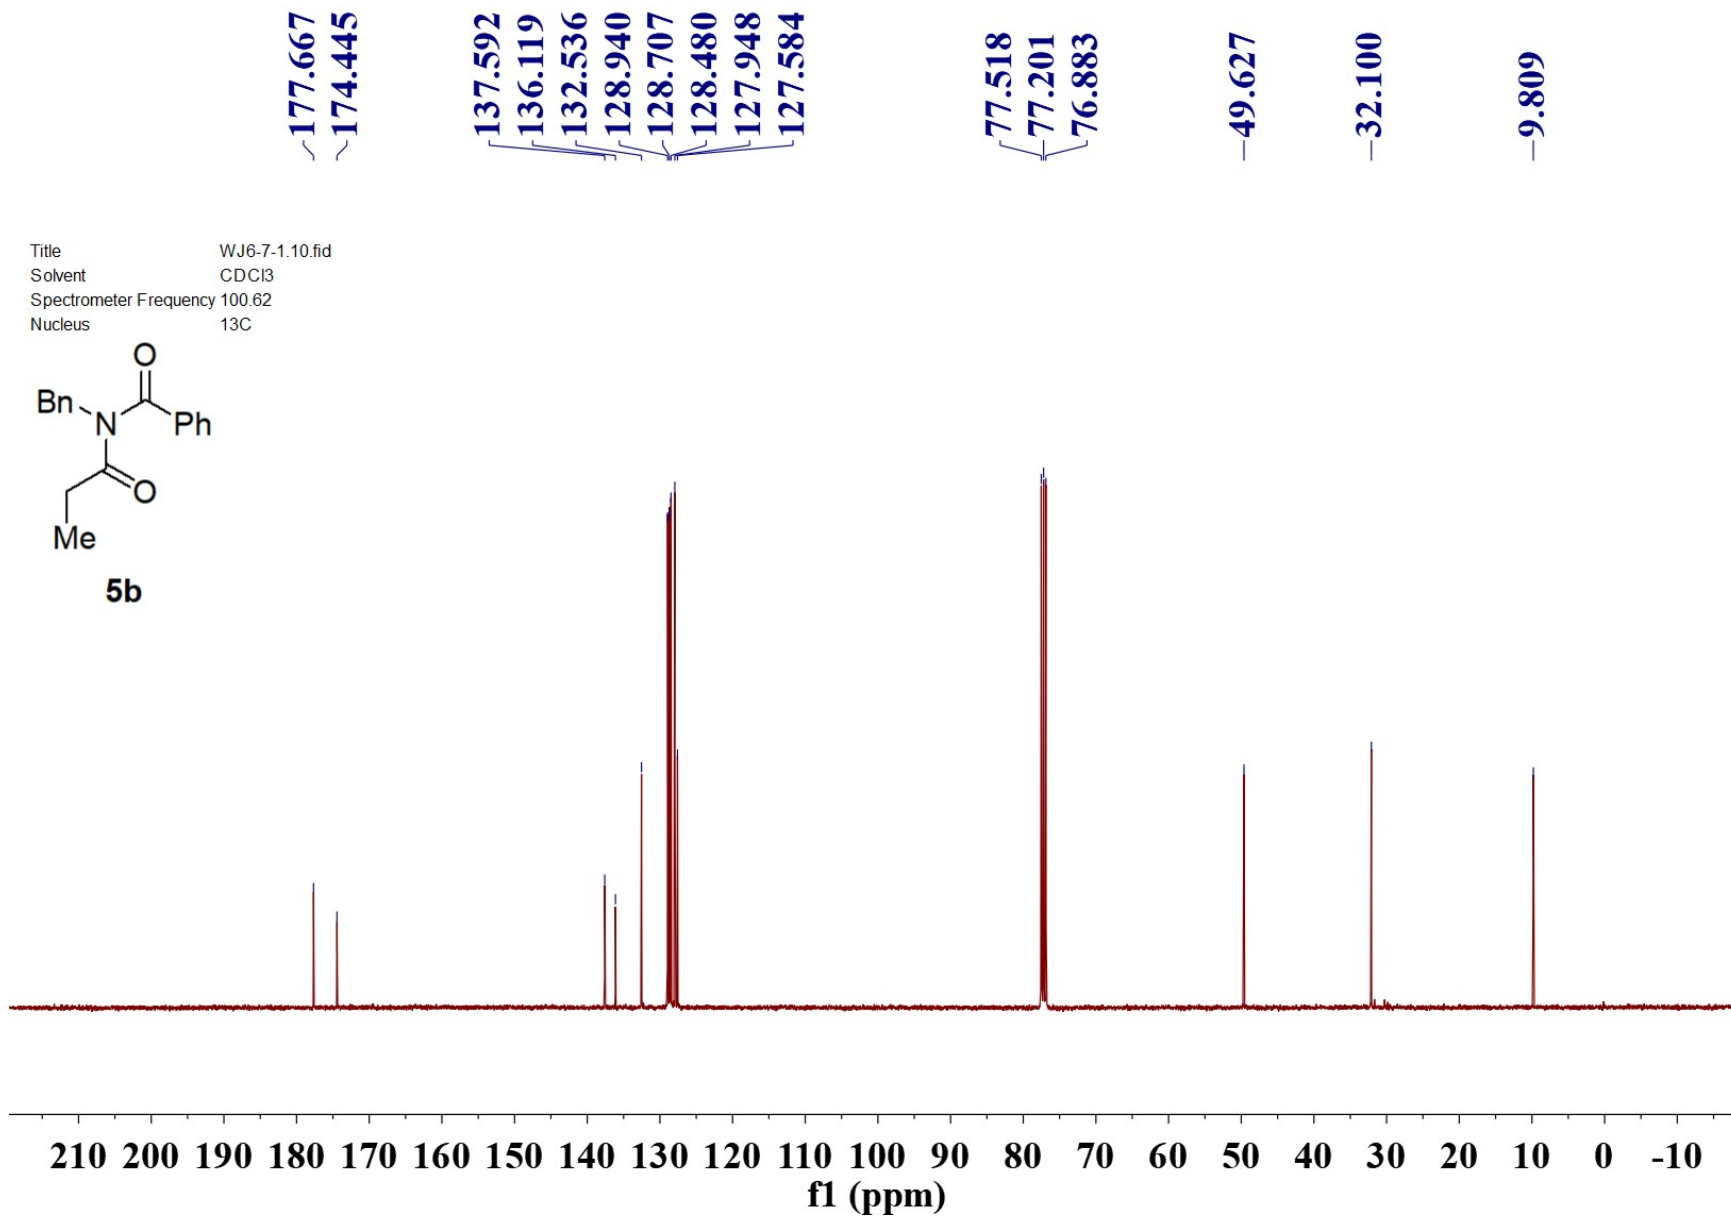



### NOESY Spectra of Cyclobutenamides 3.

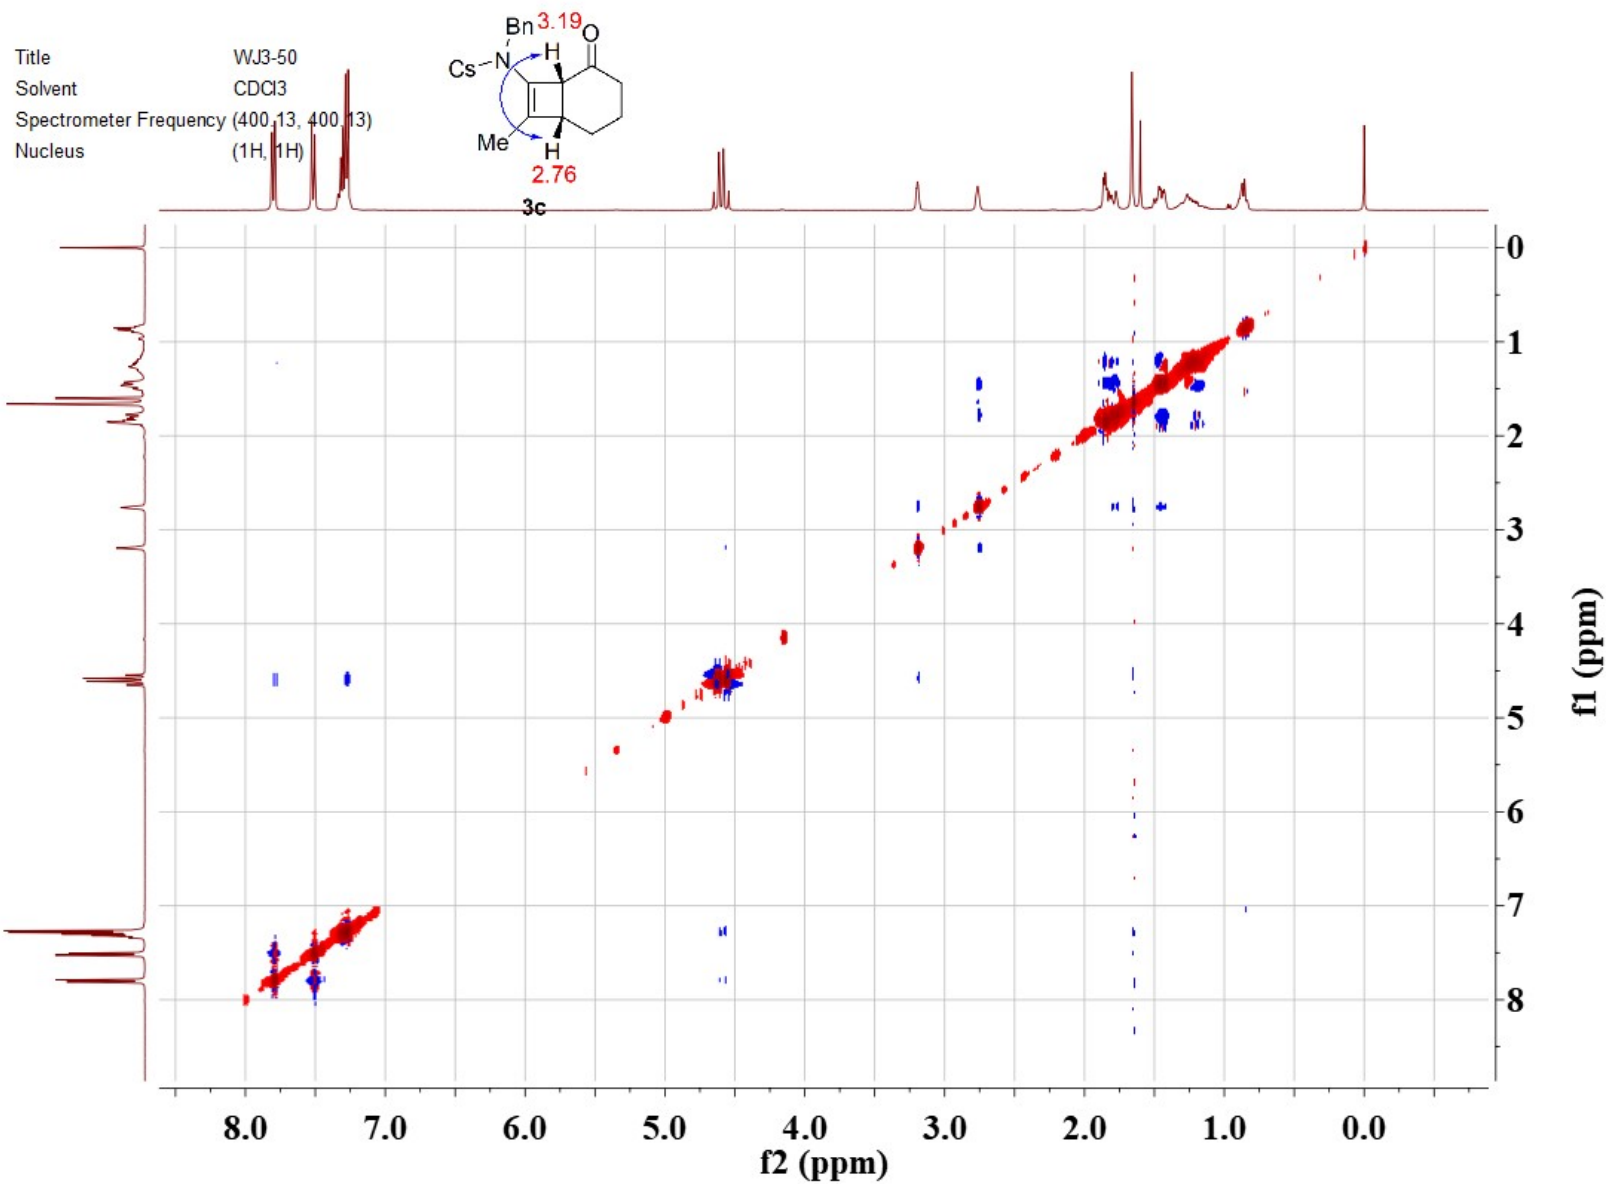

Title WJ3-50  
Solvent CDCl3  
Spectrometer Frequency (400.13, 400.13)  
Nucleus (1H, 1H)

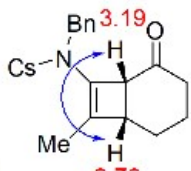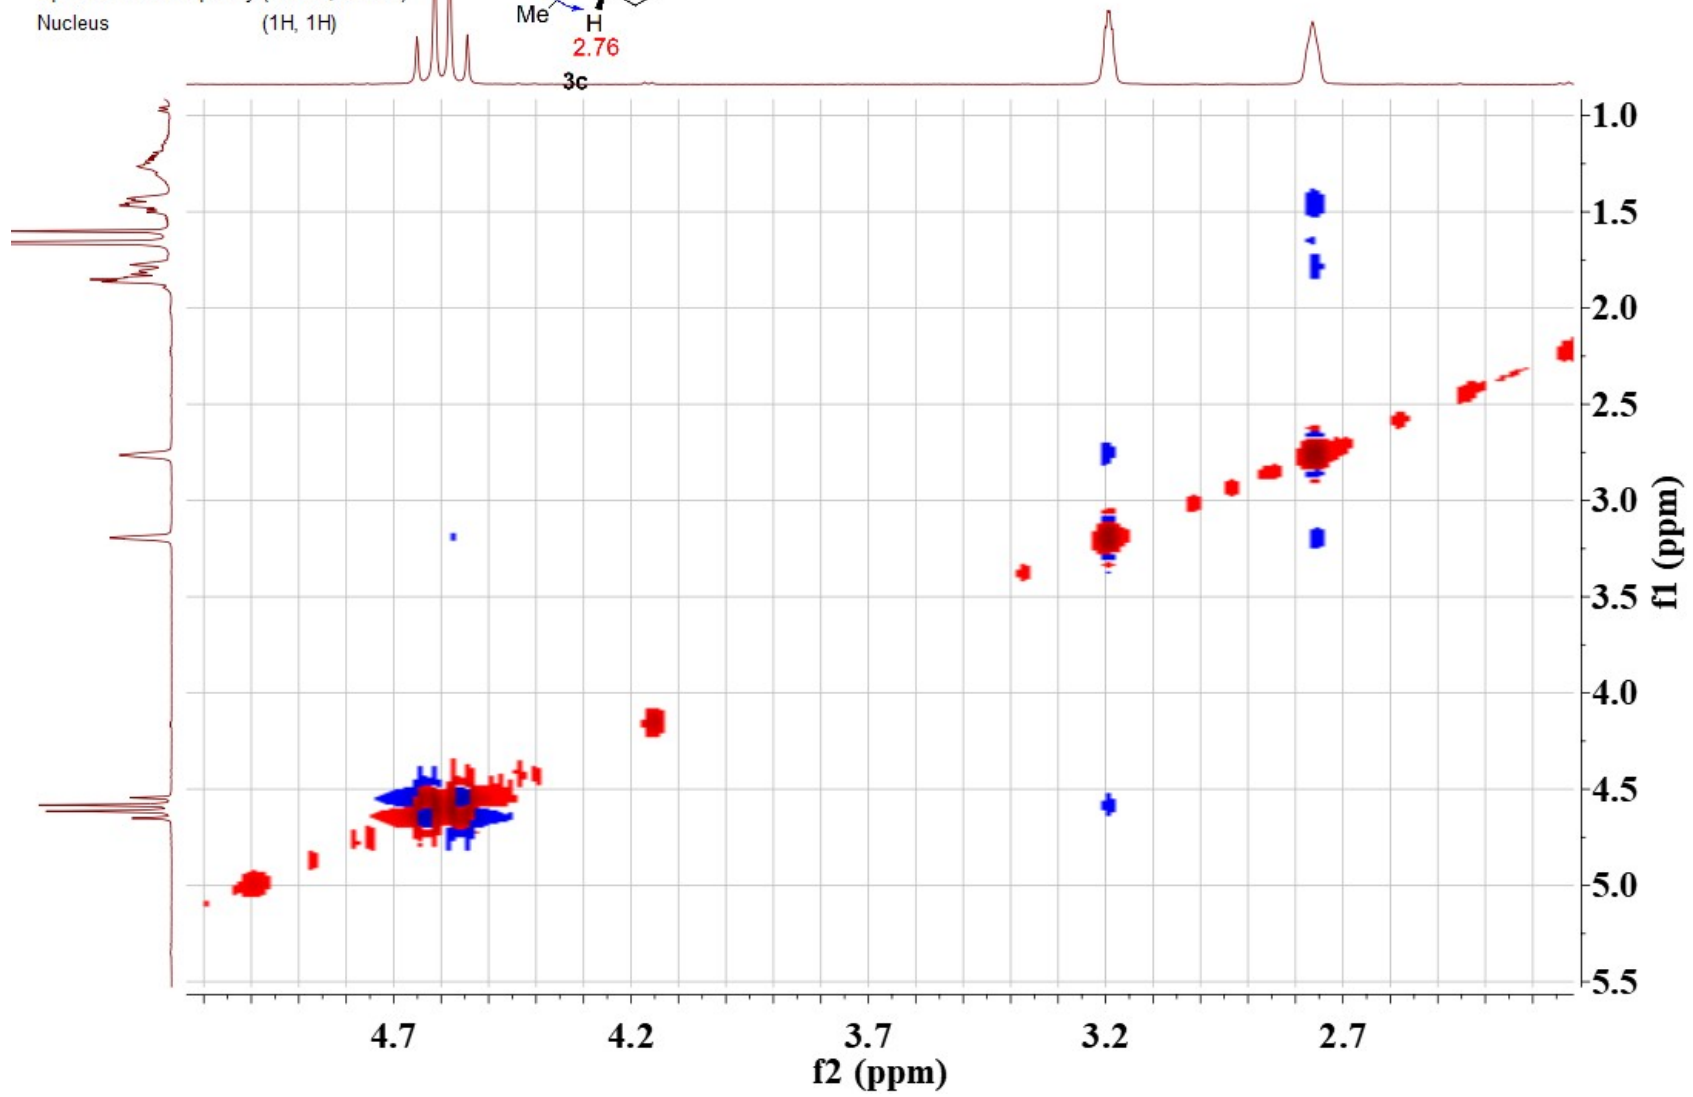

Title WJ3-74  
Solvent CDCl3  
Spectrometer Frequency (400.13, 400.13)  
Nucleus (1H, 1H)

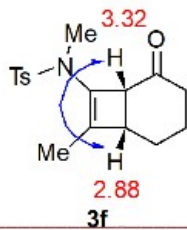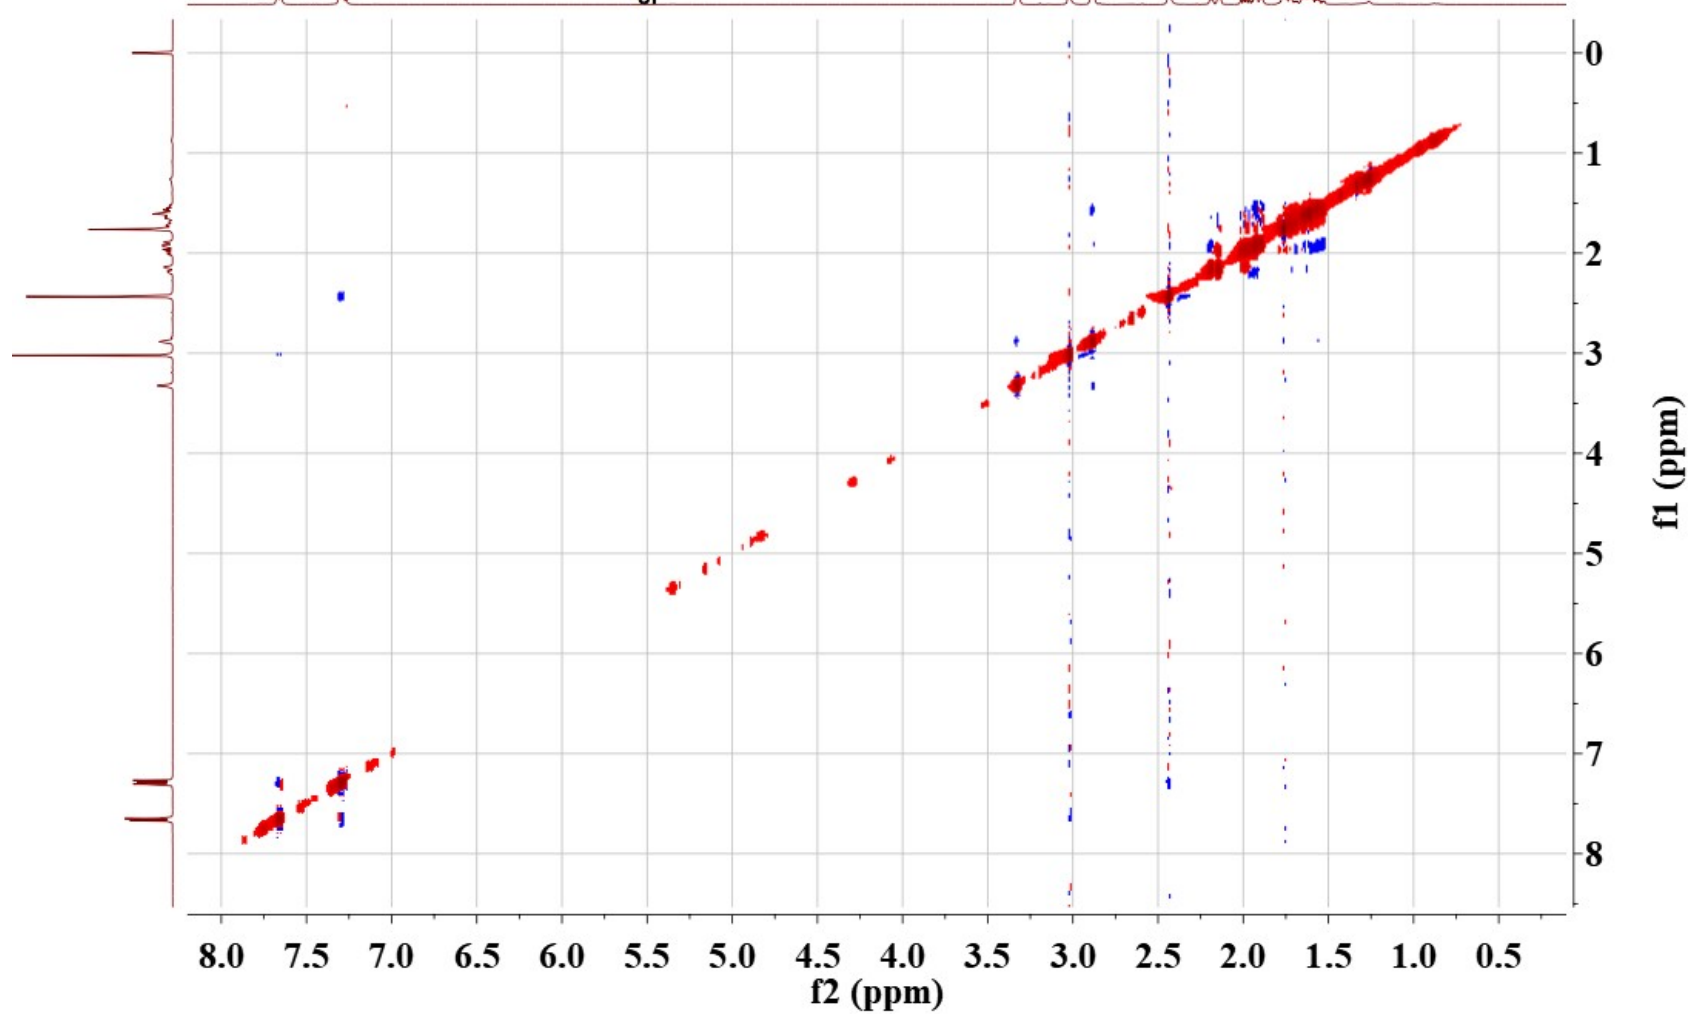

Title WJ3-74  
Solvent CDCl3  
Spectrometer Frequency (400.13, 400.13)  
Nucleus (1H, 1H)

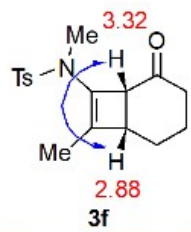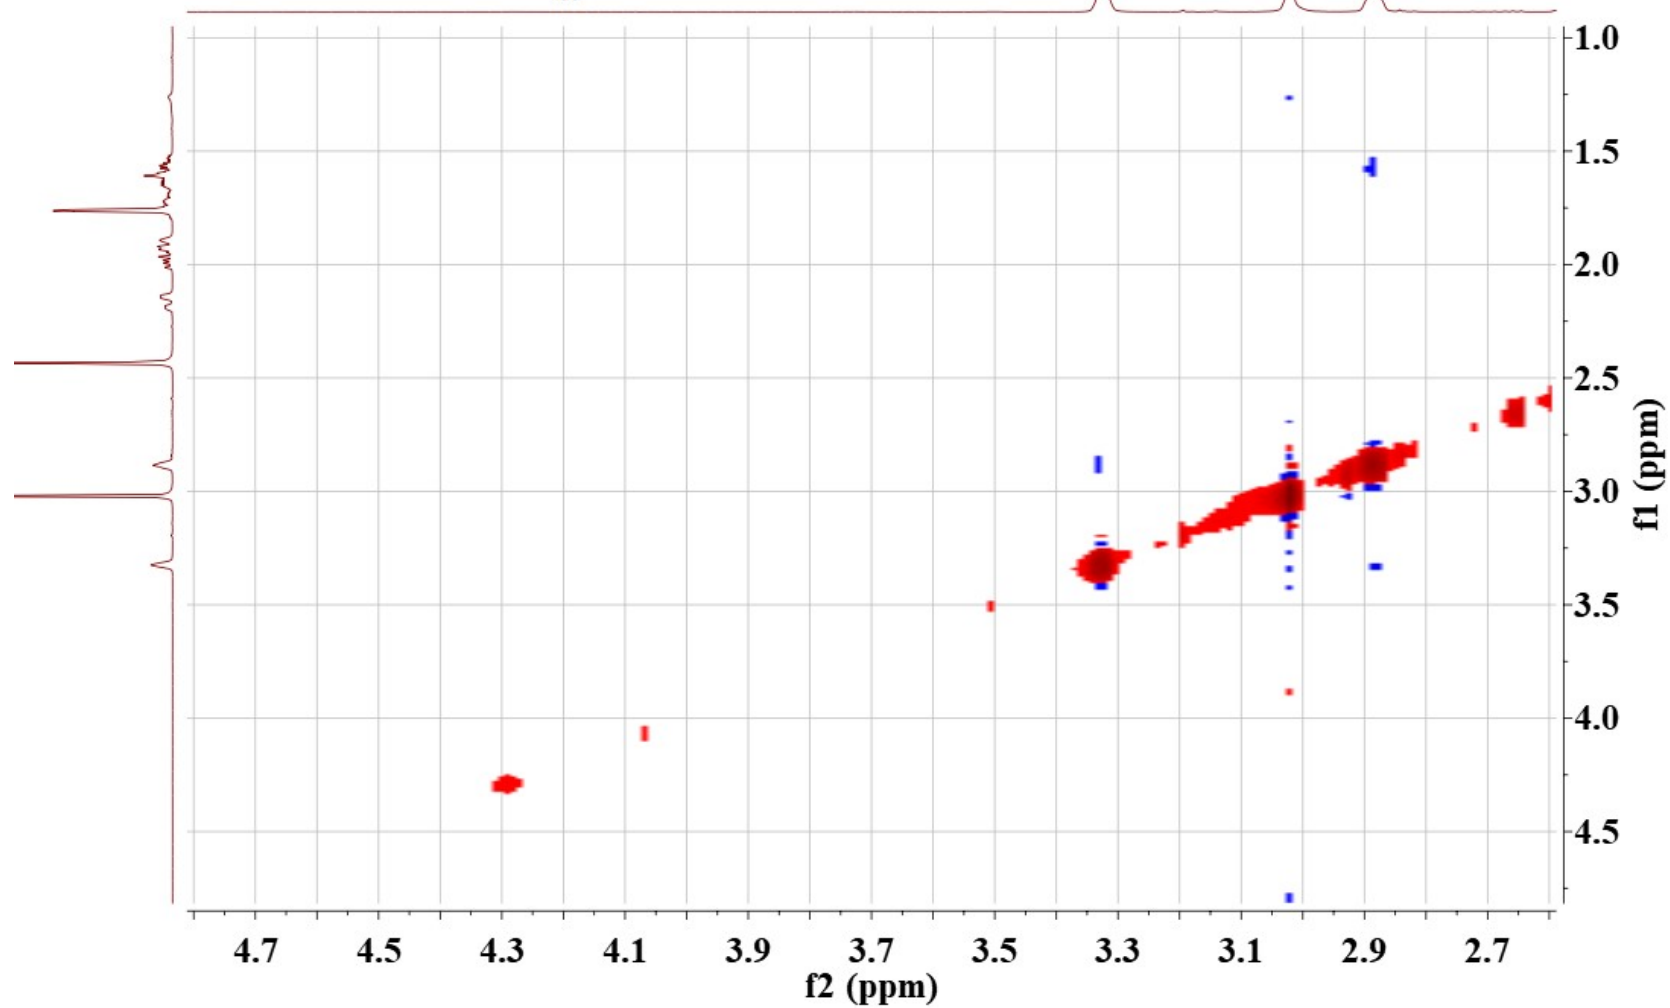

Title WJ4-11  
Solvent CDCl<sub>3</sub>  
Spectrometer Frequency (400.13, 400.13)  
Nucleus (1H, 1H)

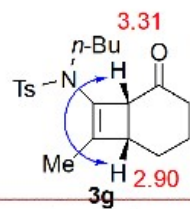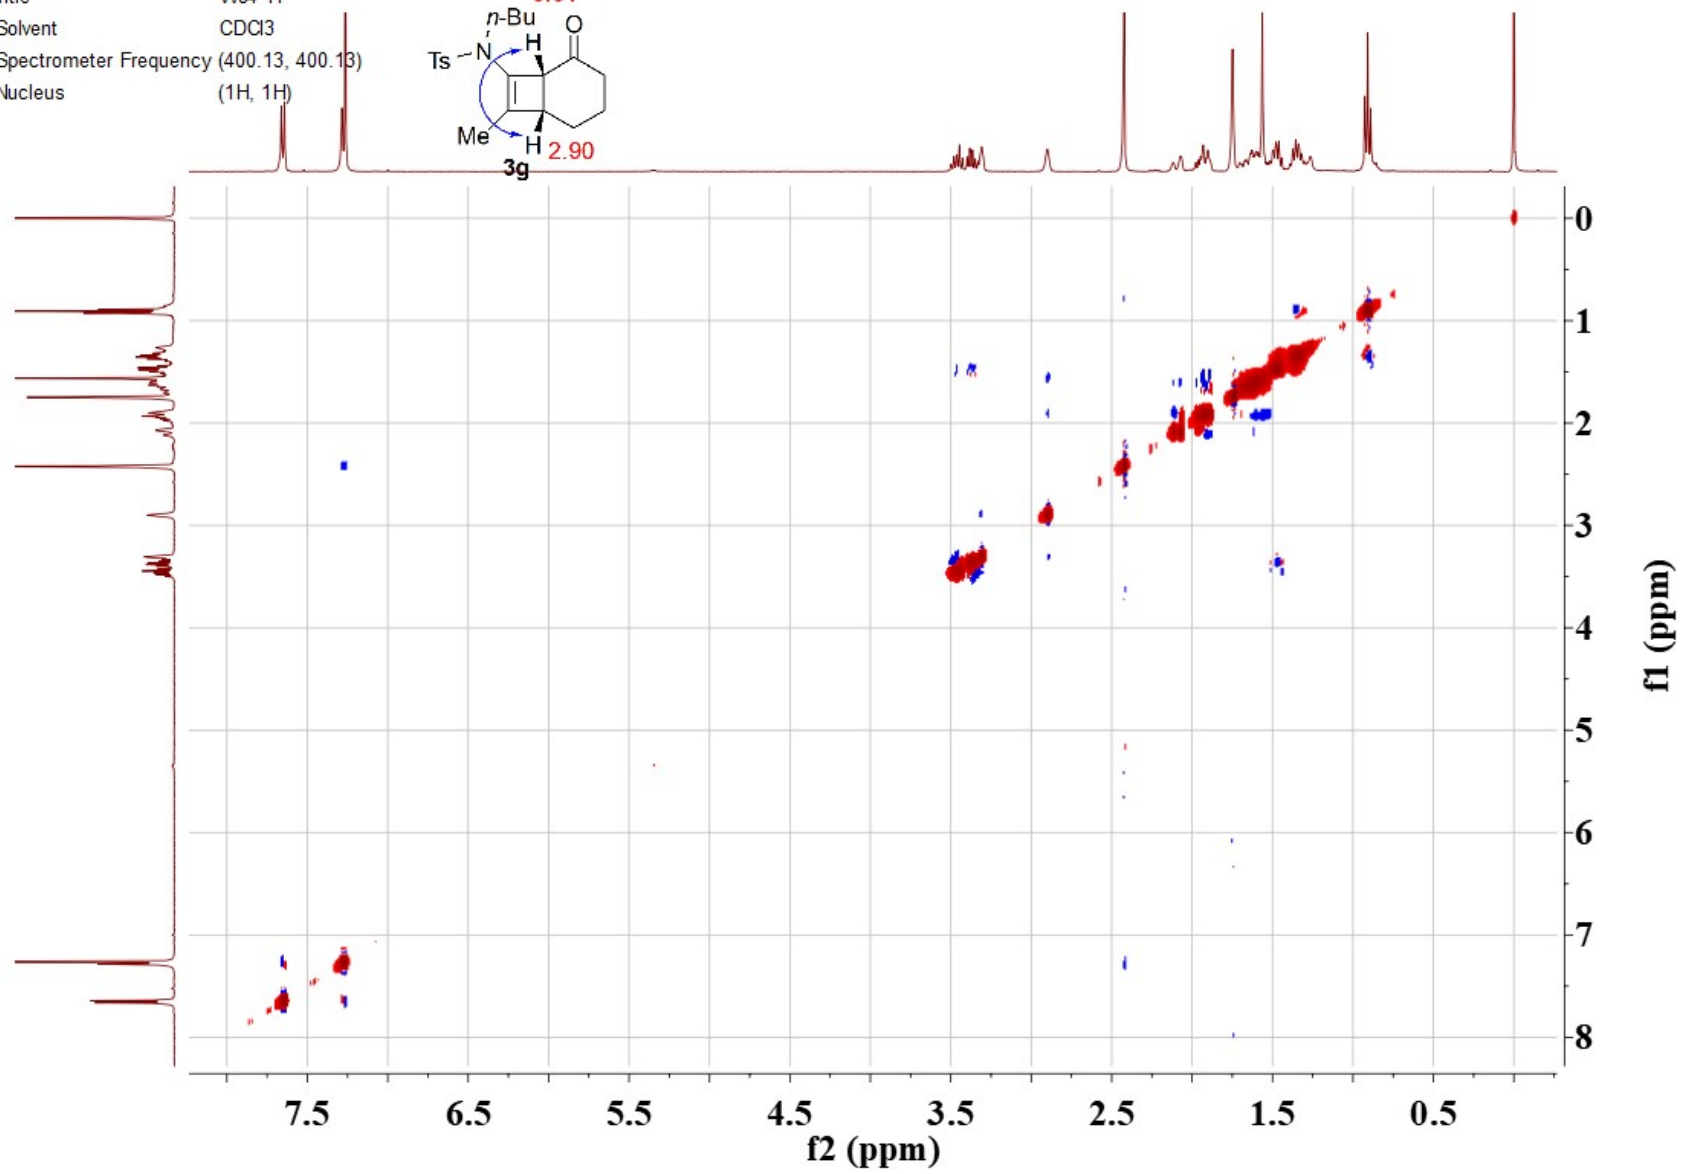

Title WJ4-11  
Solvent CDCl3  
Spectrometer Frequency (400.13, 400.13)  
Nucleus (1H, 1H)

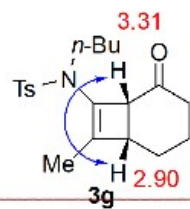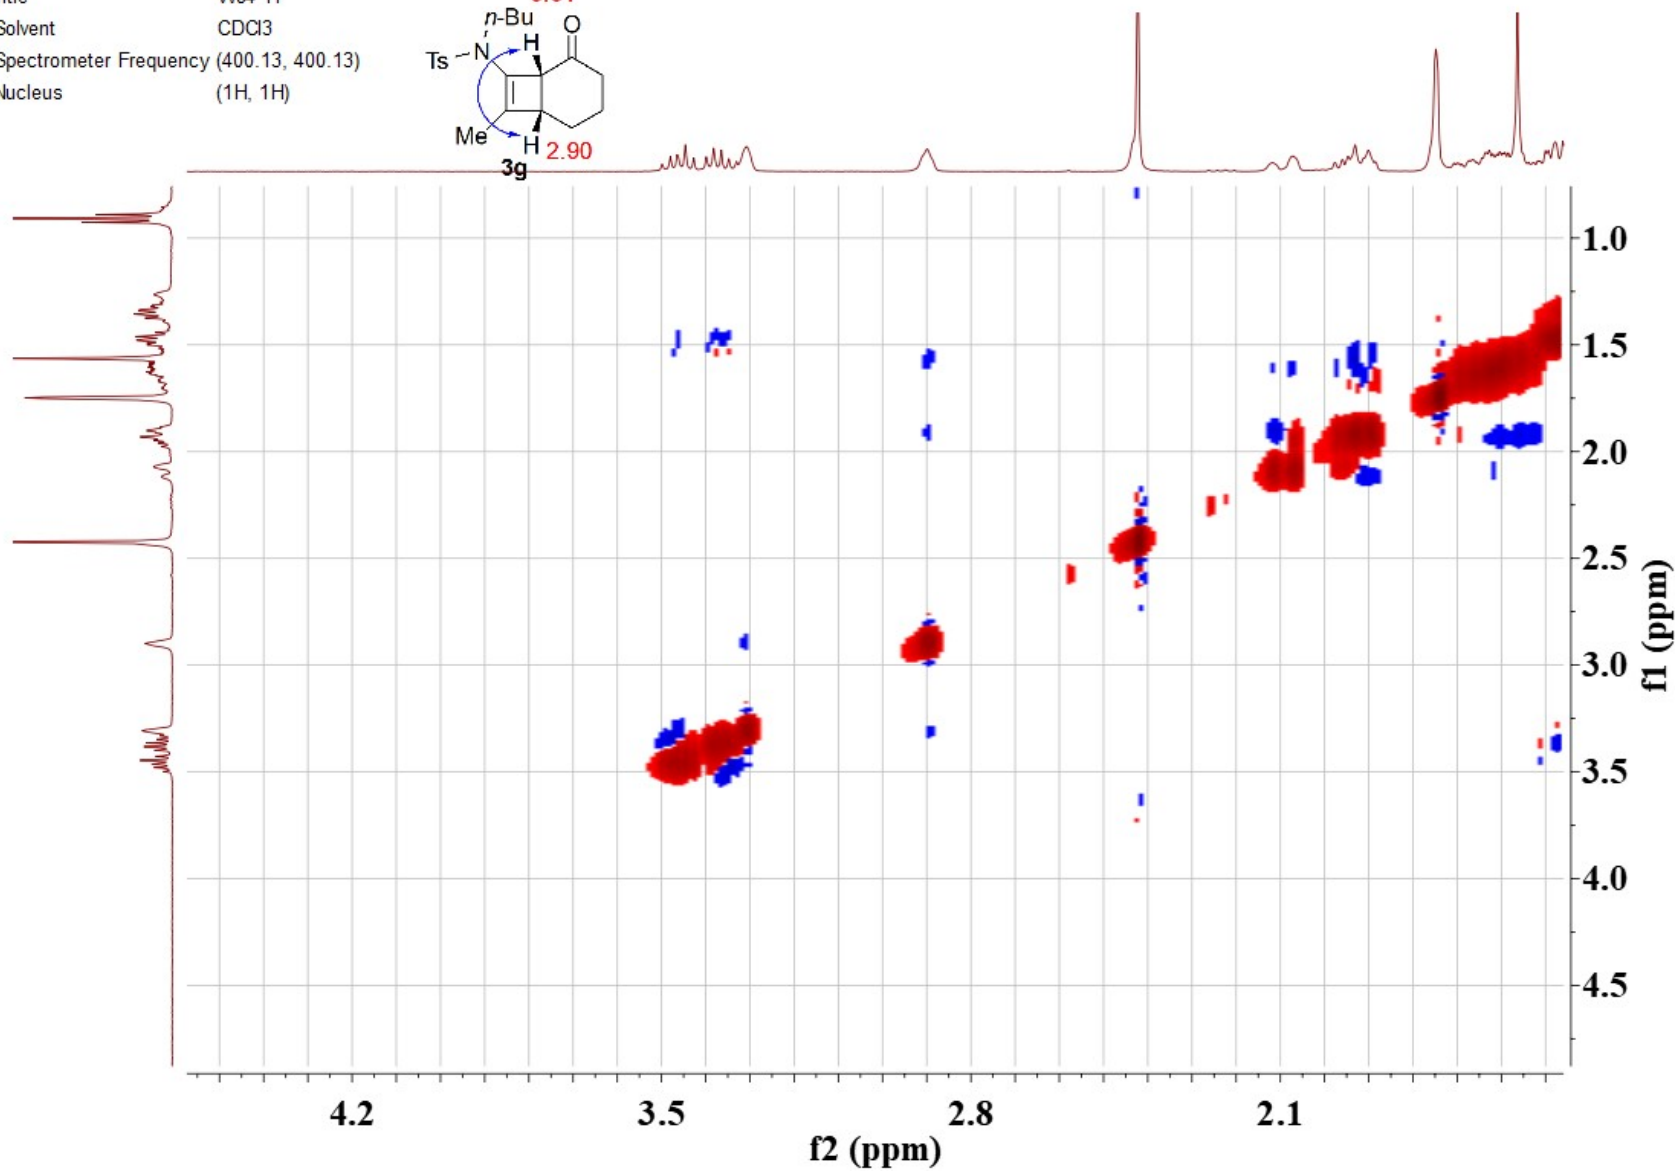



Title WJ4-7  
Solvent CDCl3  
Spectrometer Frequency (400.13, 400.13)  
Nucleus (1H, 1H)

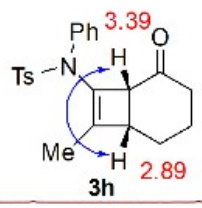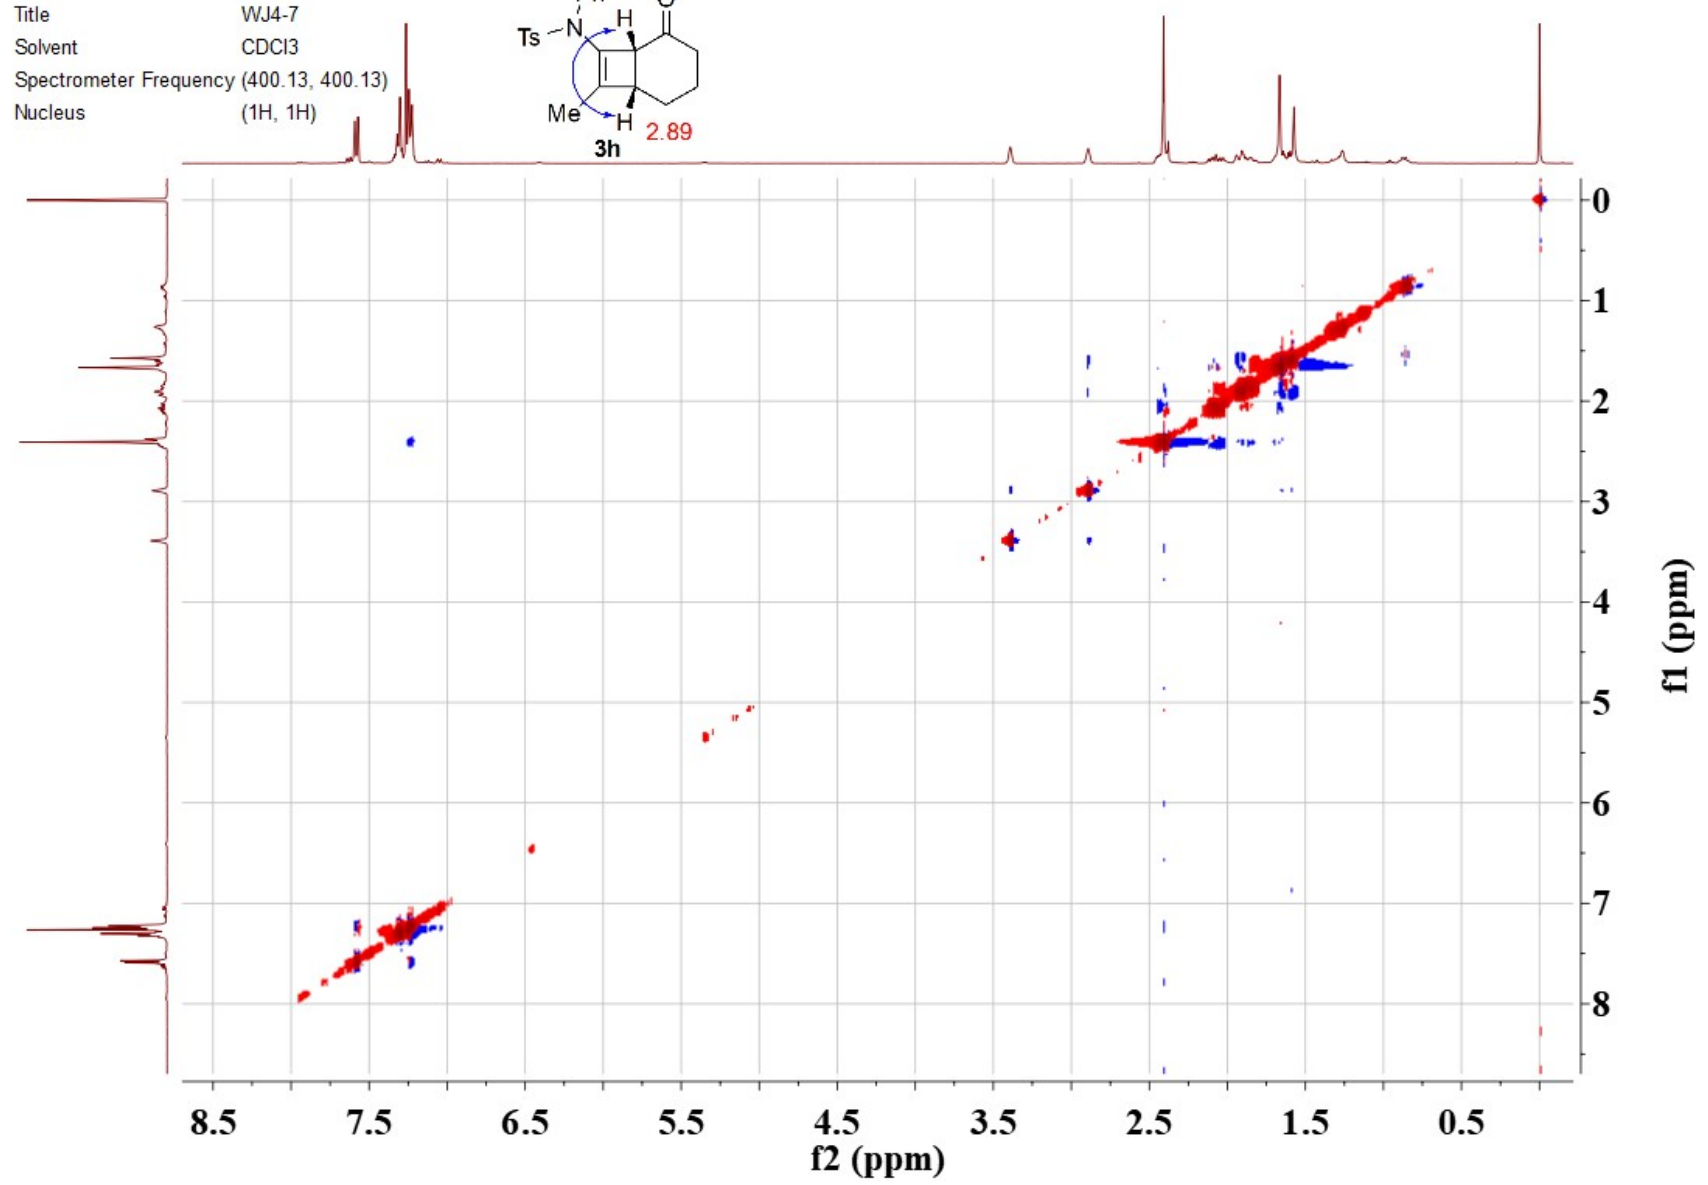

Title WJ4-7  
Solvent CDCl3  
Spectrometer Frequency (400.13, 400.13)  
Nucleus (1H, 1H)

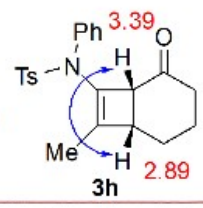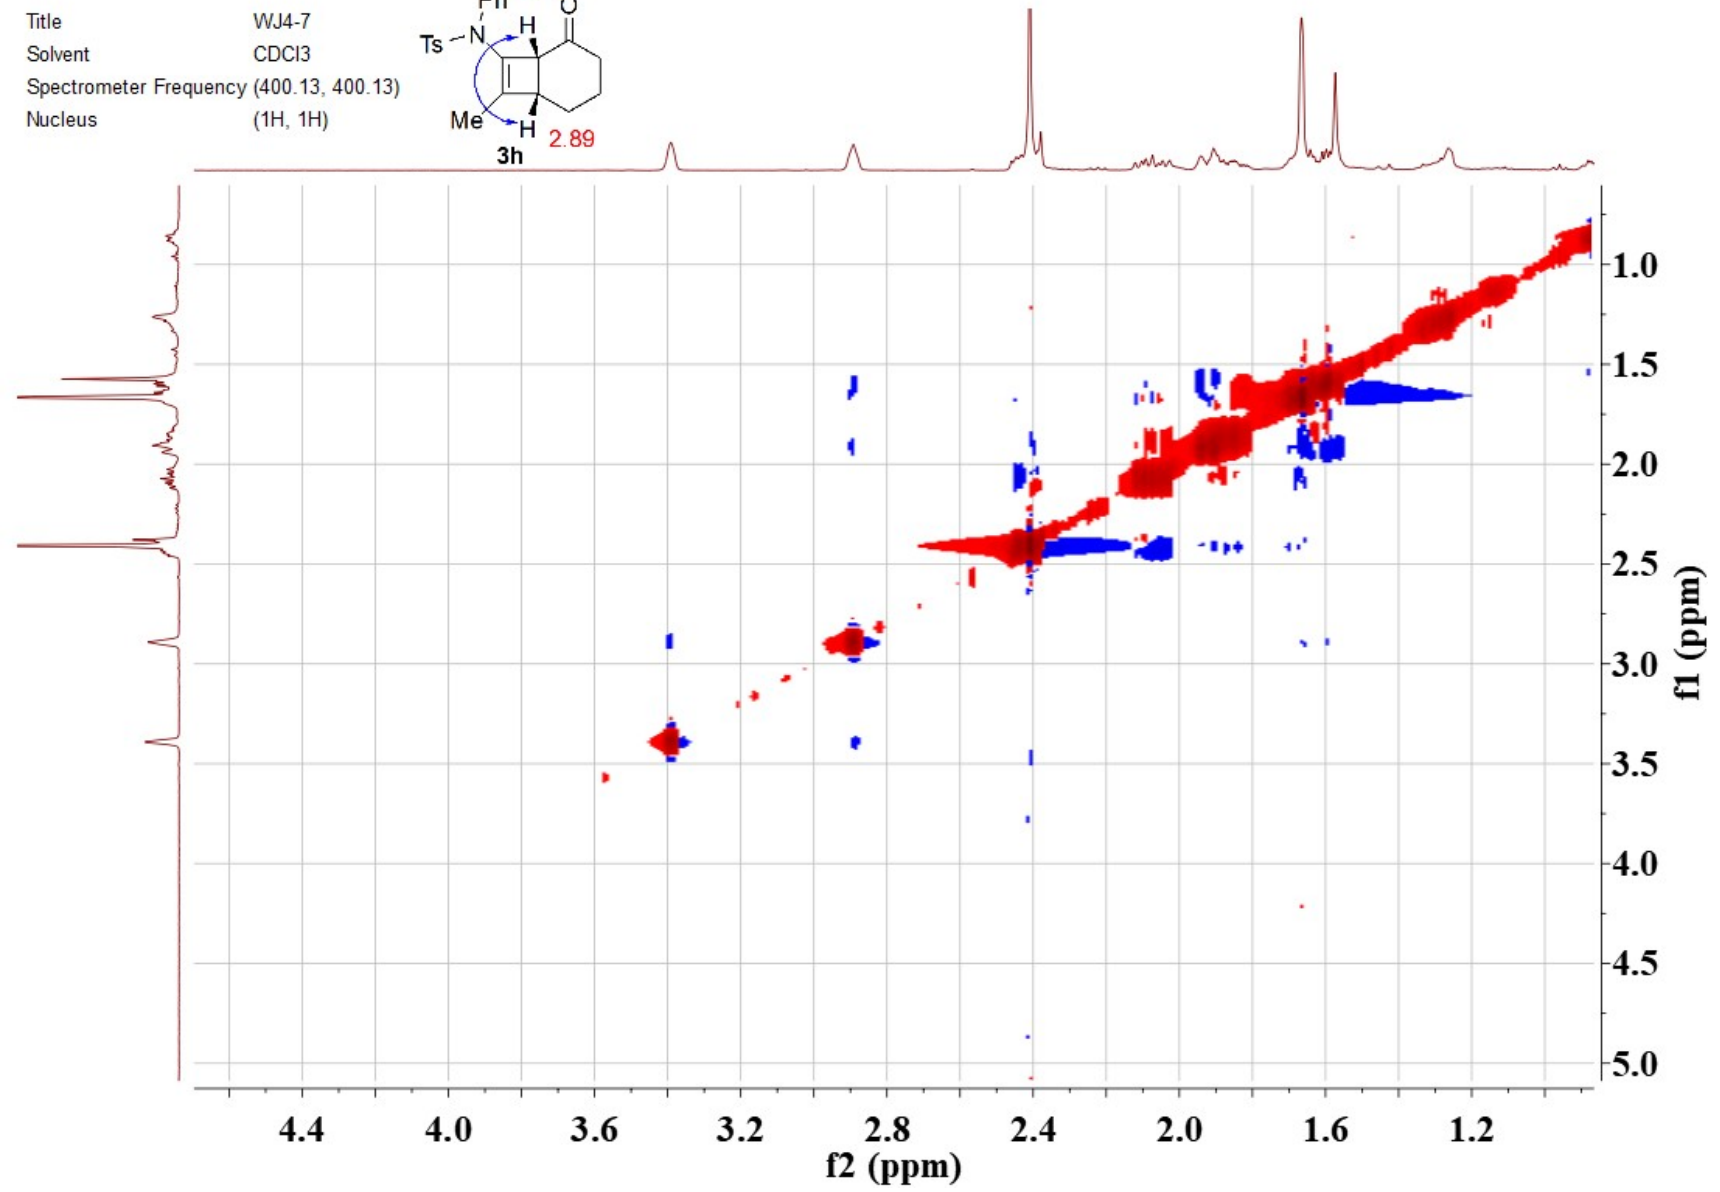

Title WJ3-71  
Solvent CDCl3  
Spectrometer Frequency (400.13, 400.13)  
Nucleus (1H, 1H)

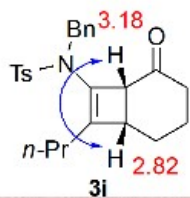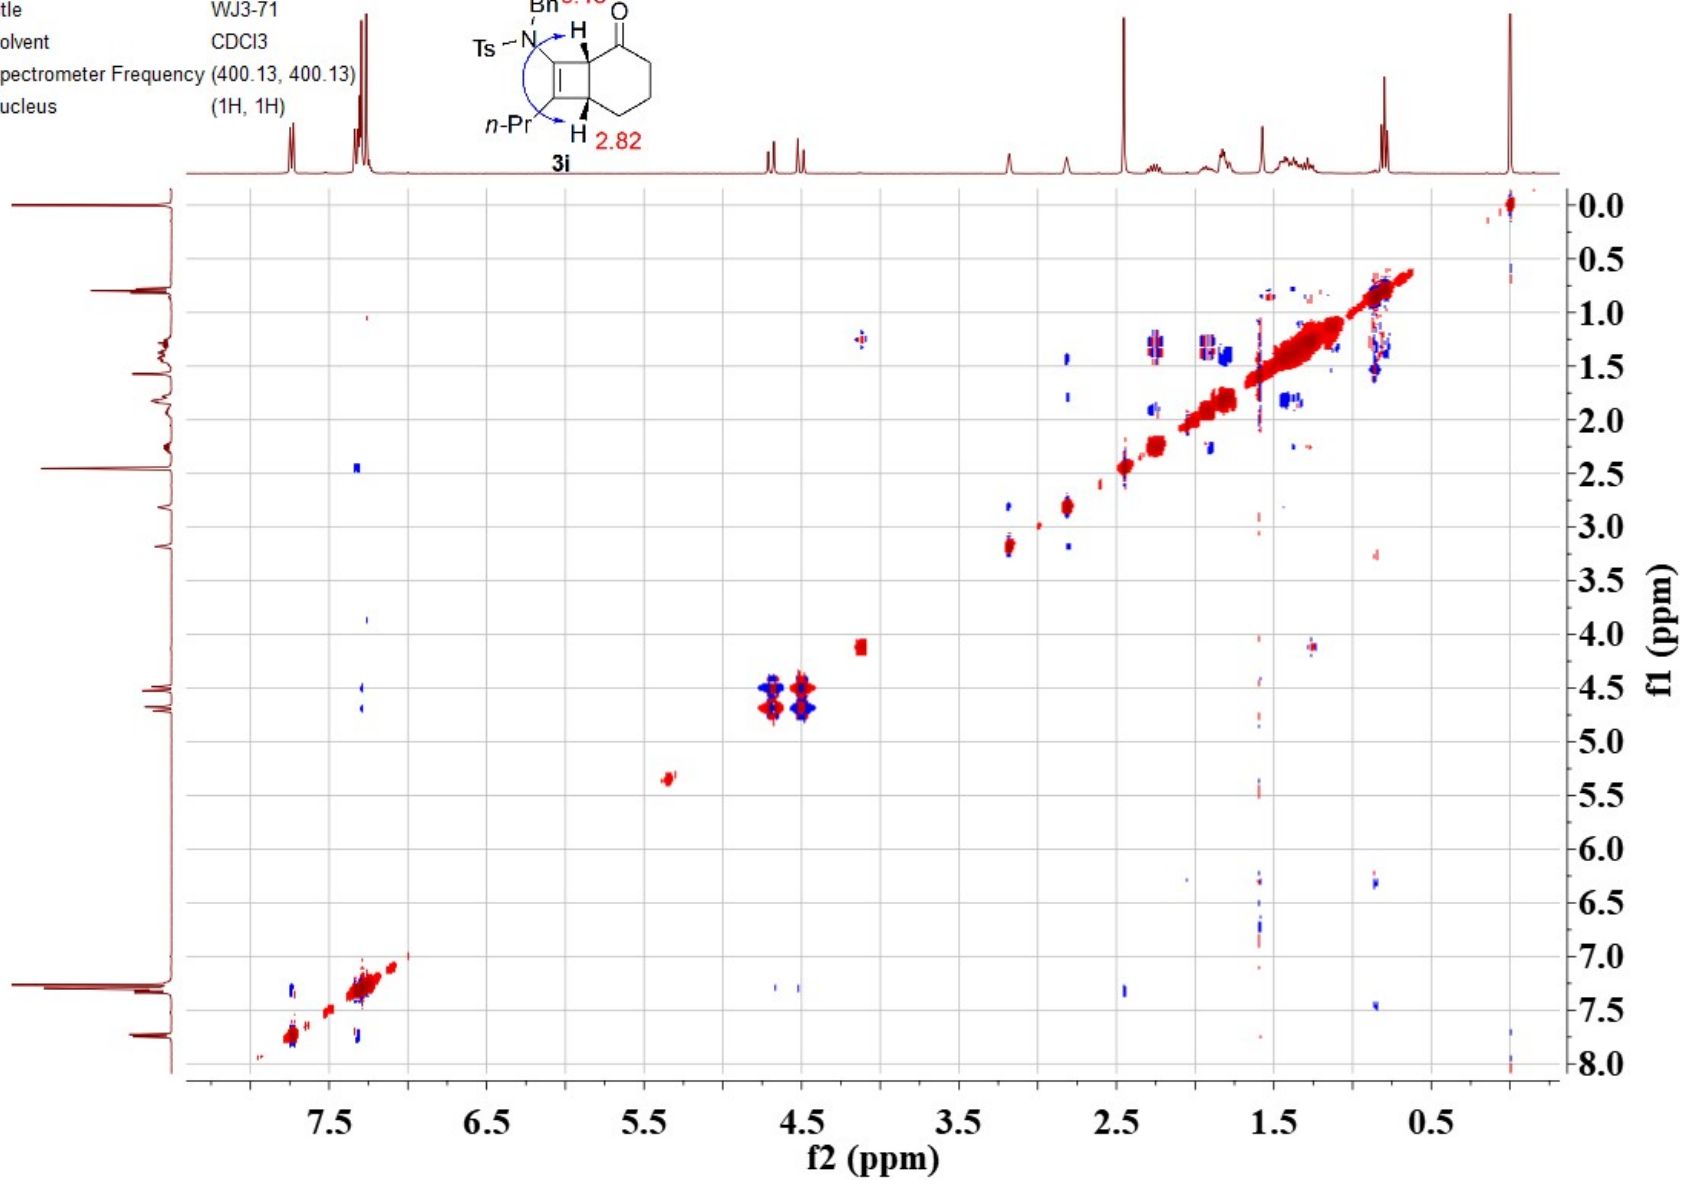

Title WJ3-71  
Solvent CDCl3  
Spectrometer Frequency (400.13, 400.13)  
Nucleus (1H, 1H)

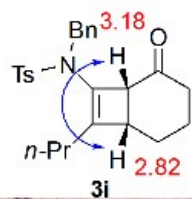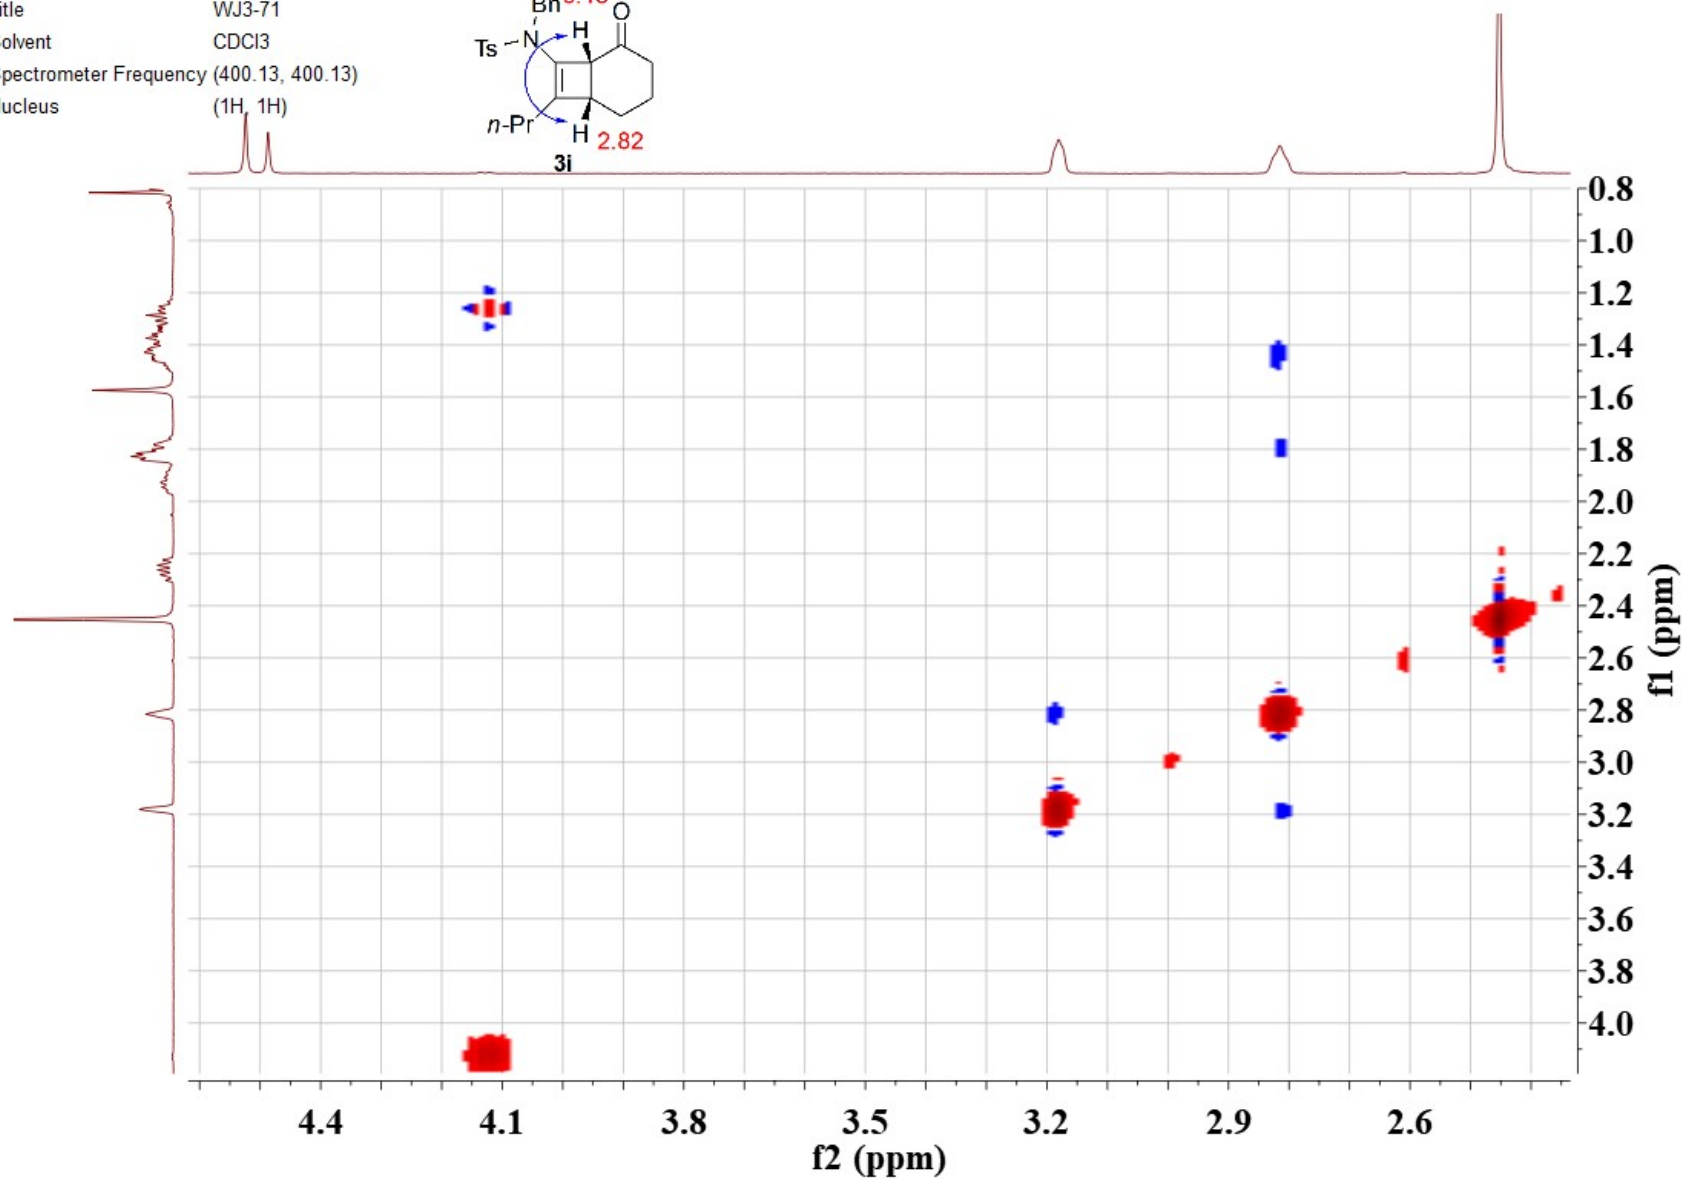

Title WJ3-73  
Solvent CDCl3  
Spectrometer Frequency (400.13, 400.13)  
Nucleus (1H, 1H)

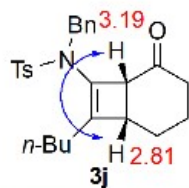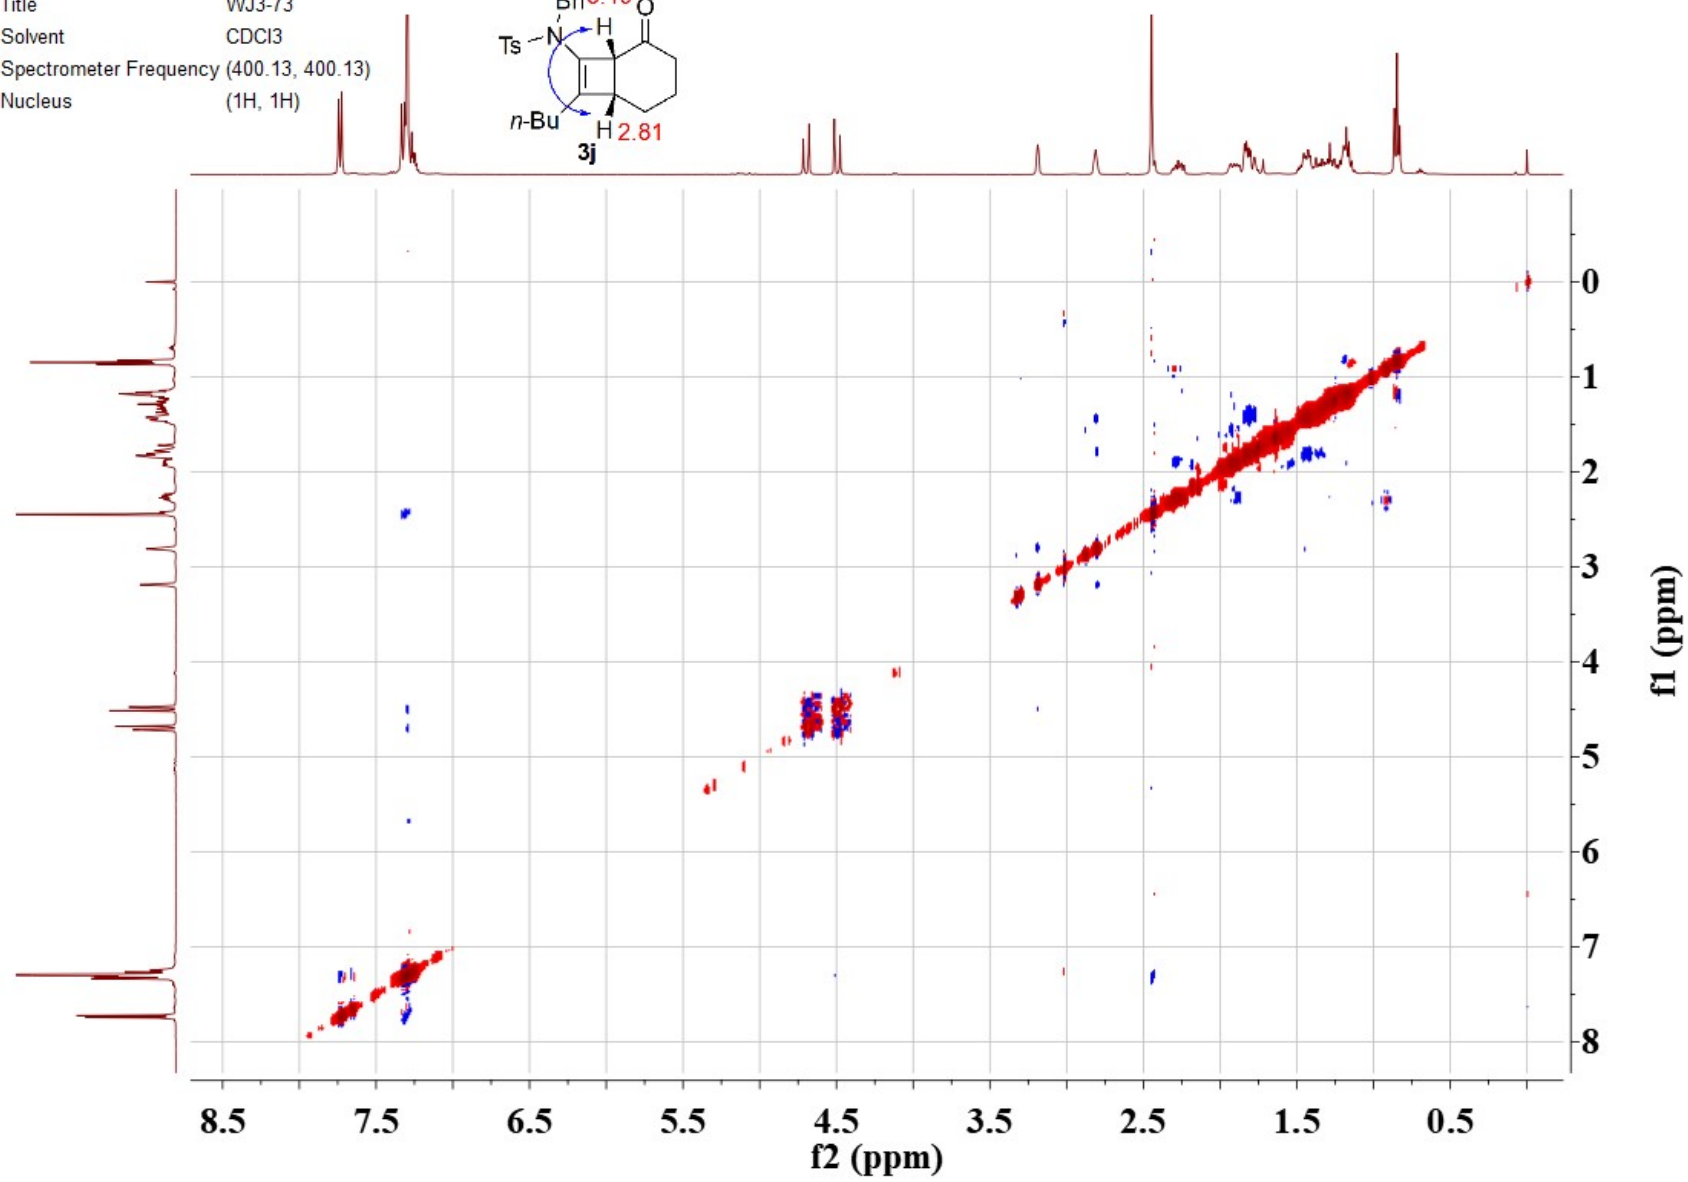

Title WJ3-73  
Solvent CDCl<sub>3</sub>  
Spectrometer Frequency (400.13, 400.13)  
Nucleus (1H, 1H)

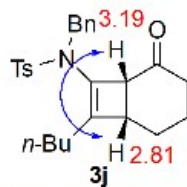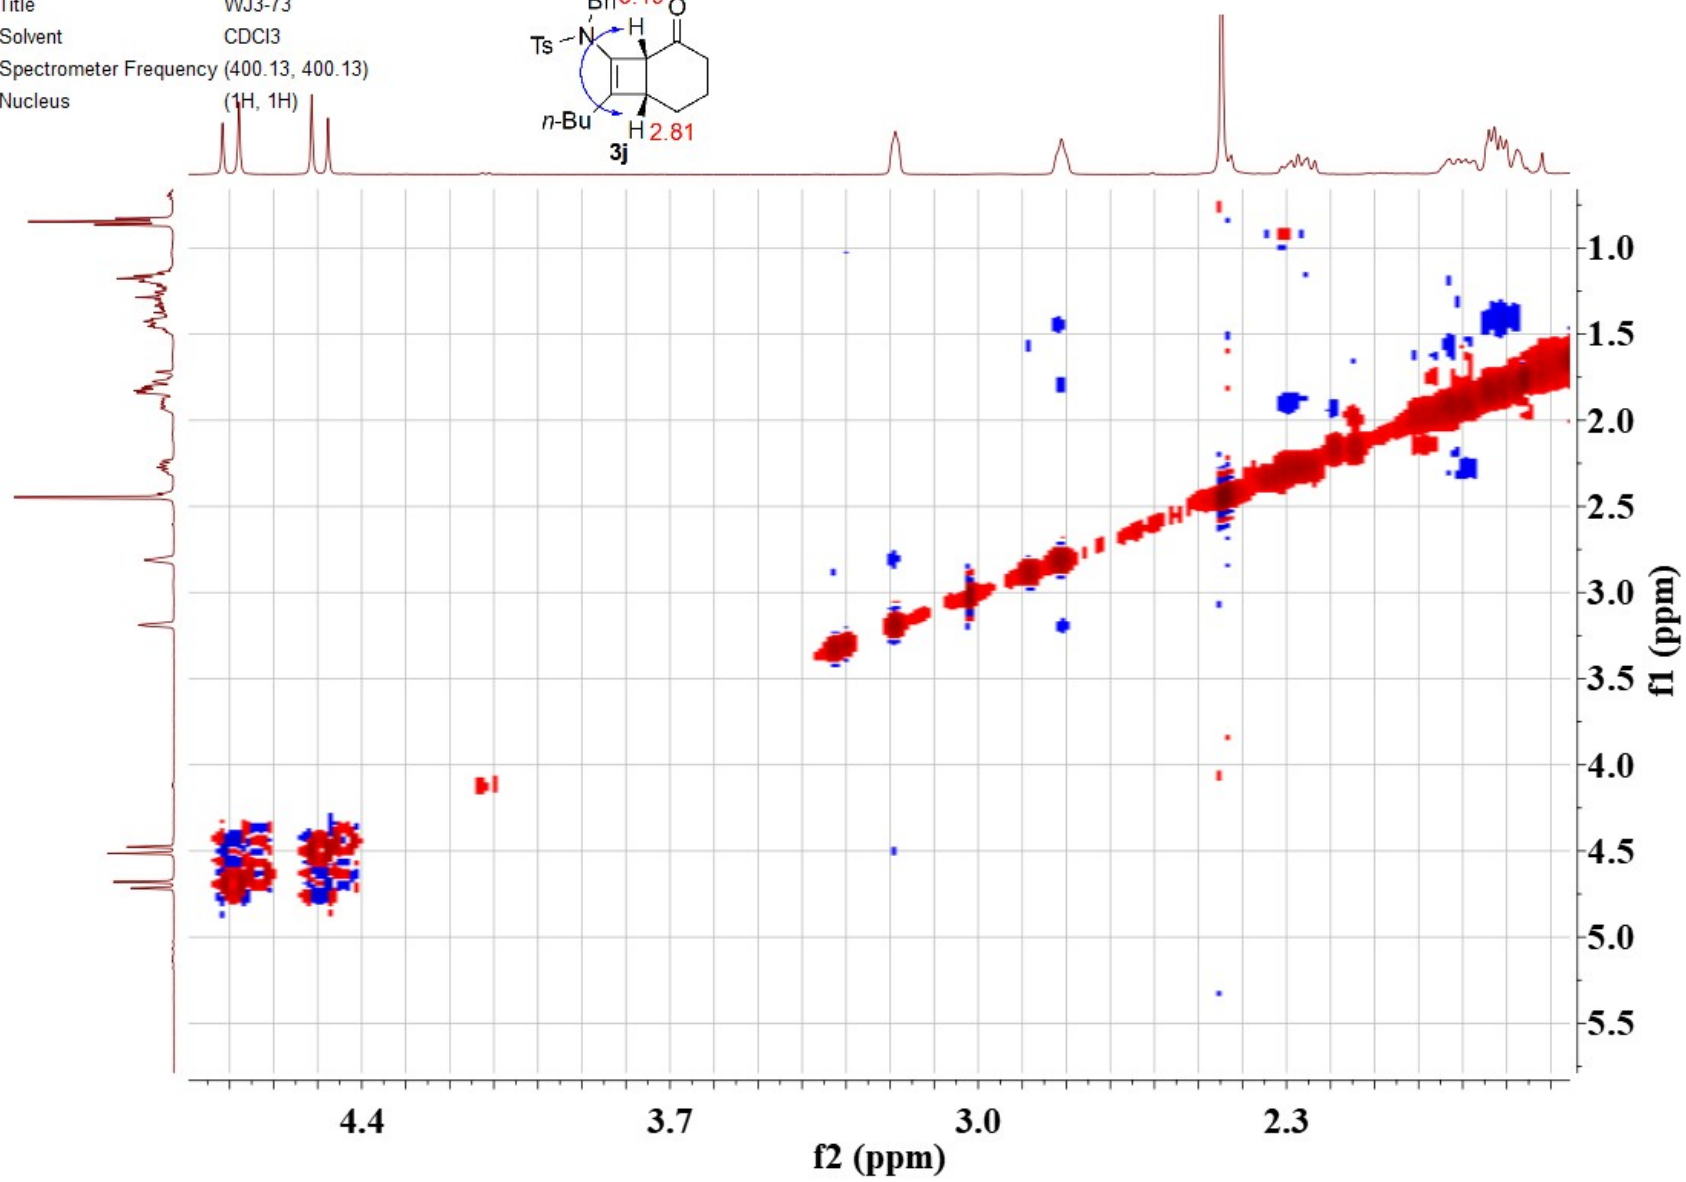

S100



Title WJ3-70  
Solvent CDCl3  
Spectrometer Frequency (400.13, 400.13)  
Nucleus (1H, 1H)

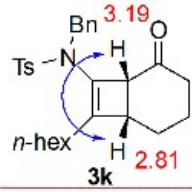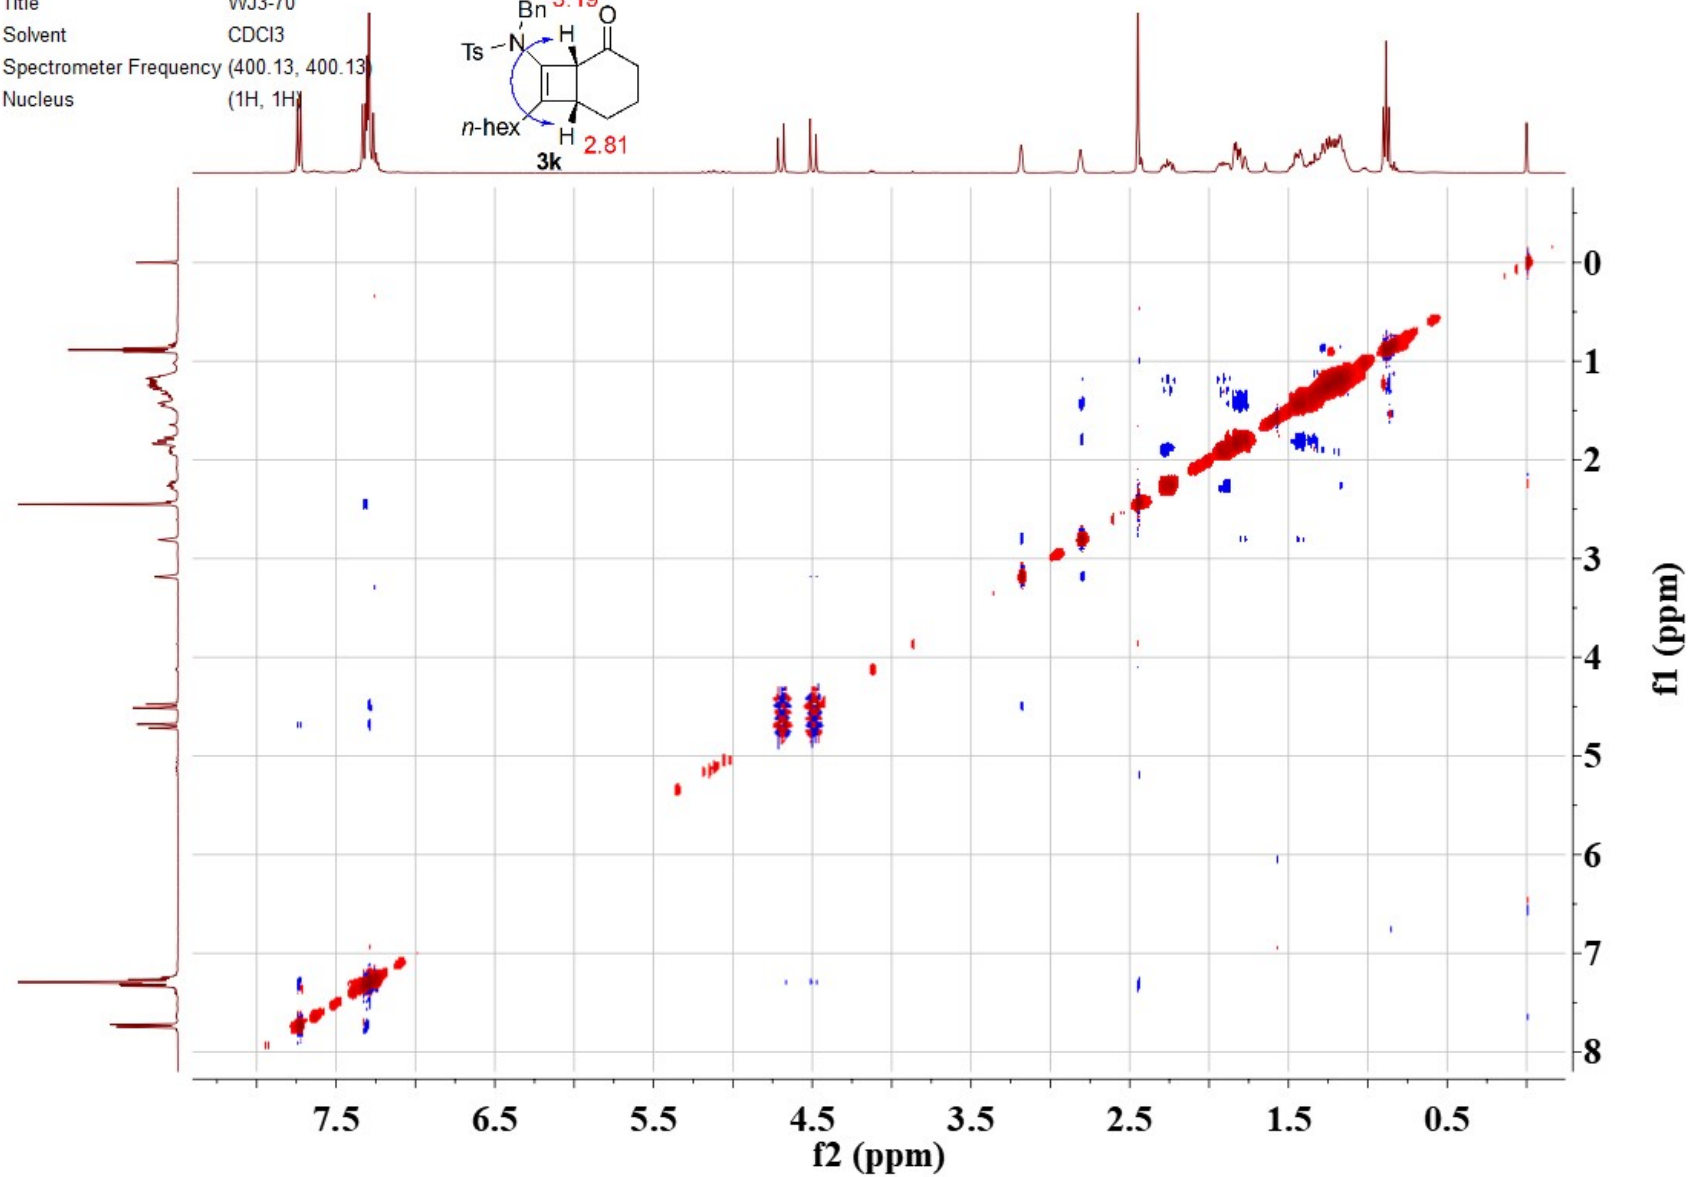

Title WJ3-70  
Solvent CDCl3  
Spectrometer Frequency (400.13, 400.13)  
Nucleus (1H, 1H)

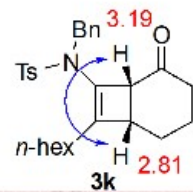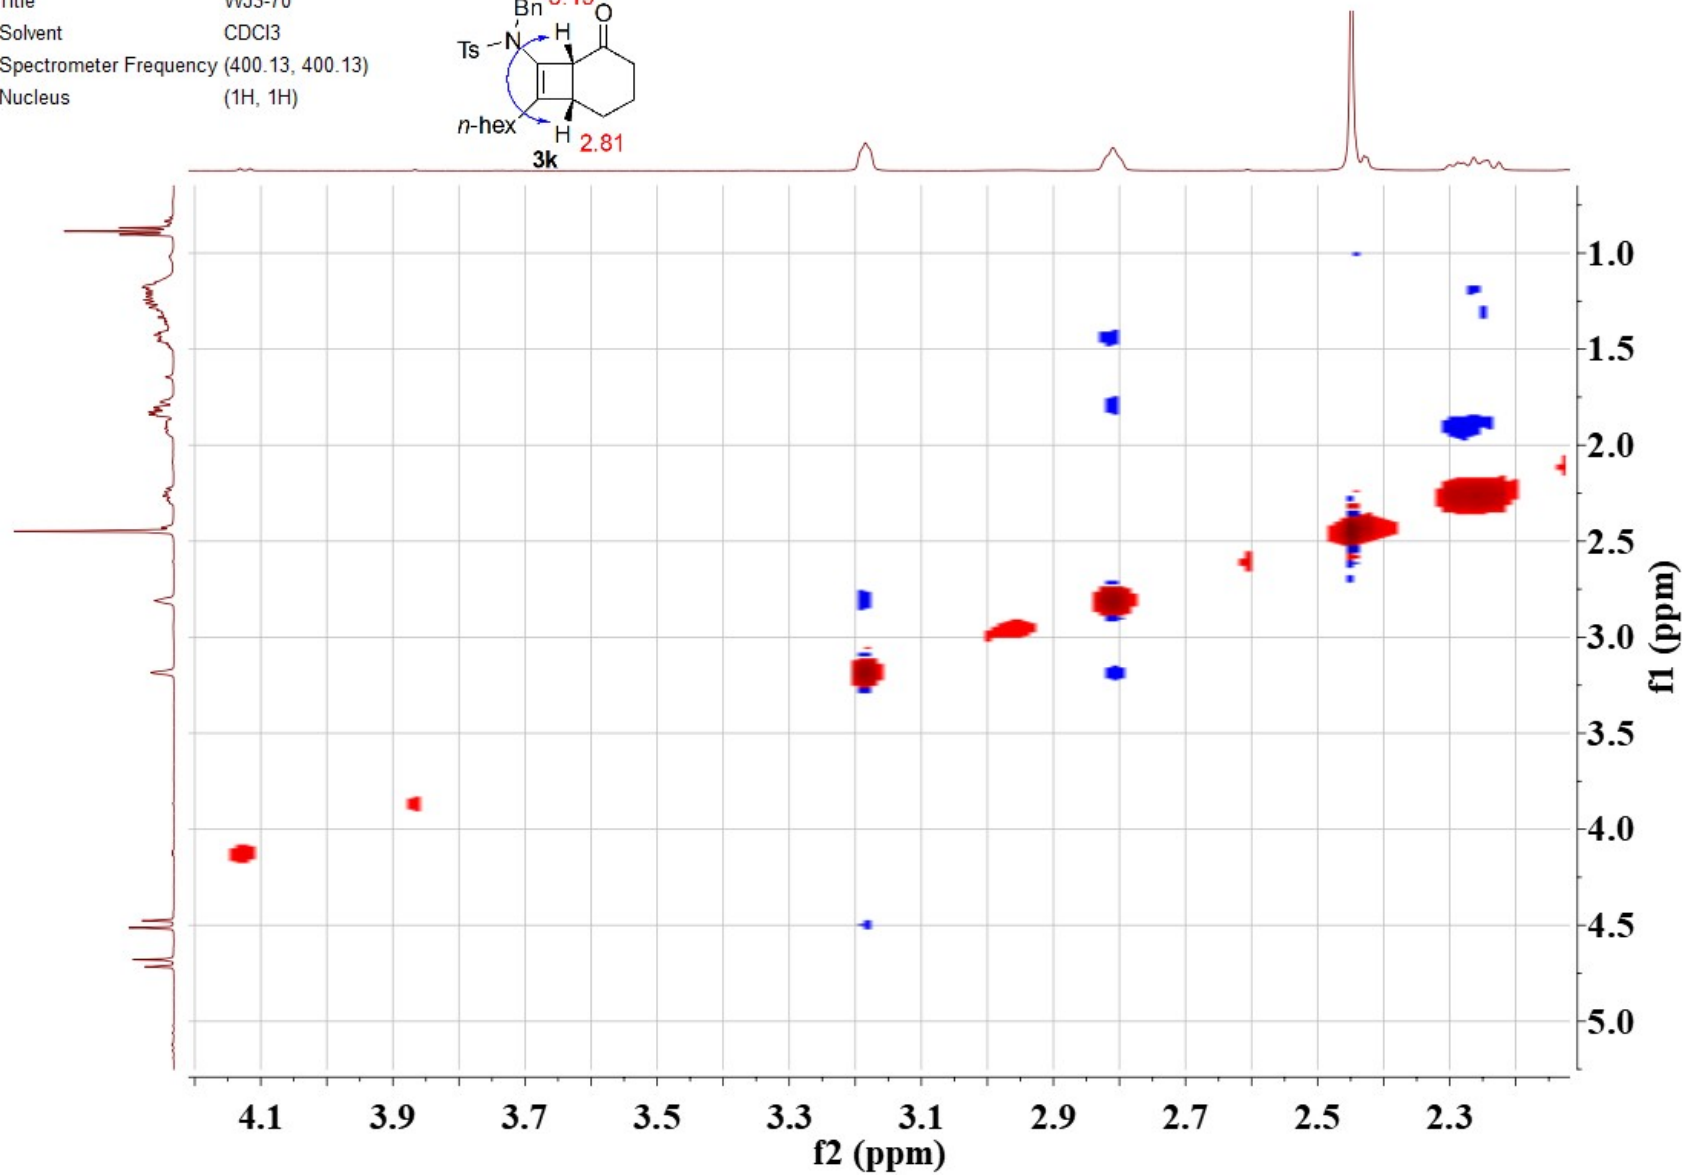

Title WJ3-67  
Solvent CDCl3  
Spectrometer Frequency (400.13, 400.13)  
Nucleus (1H, 1H)

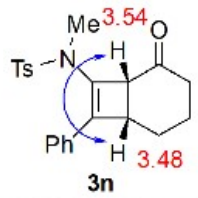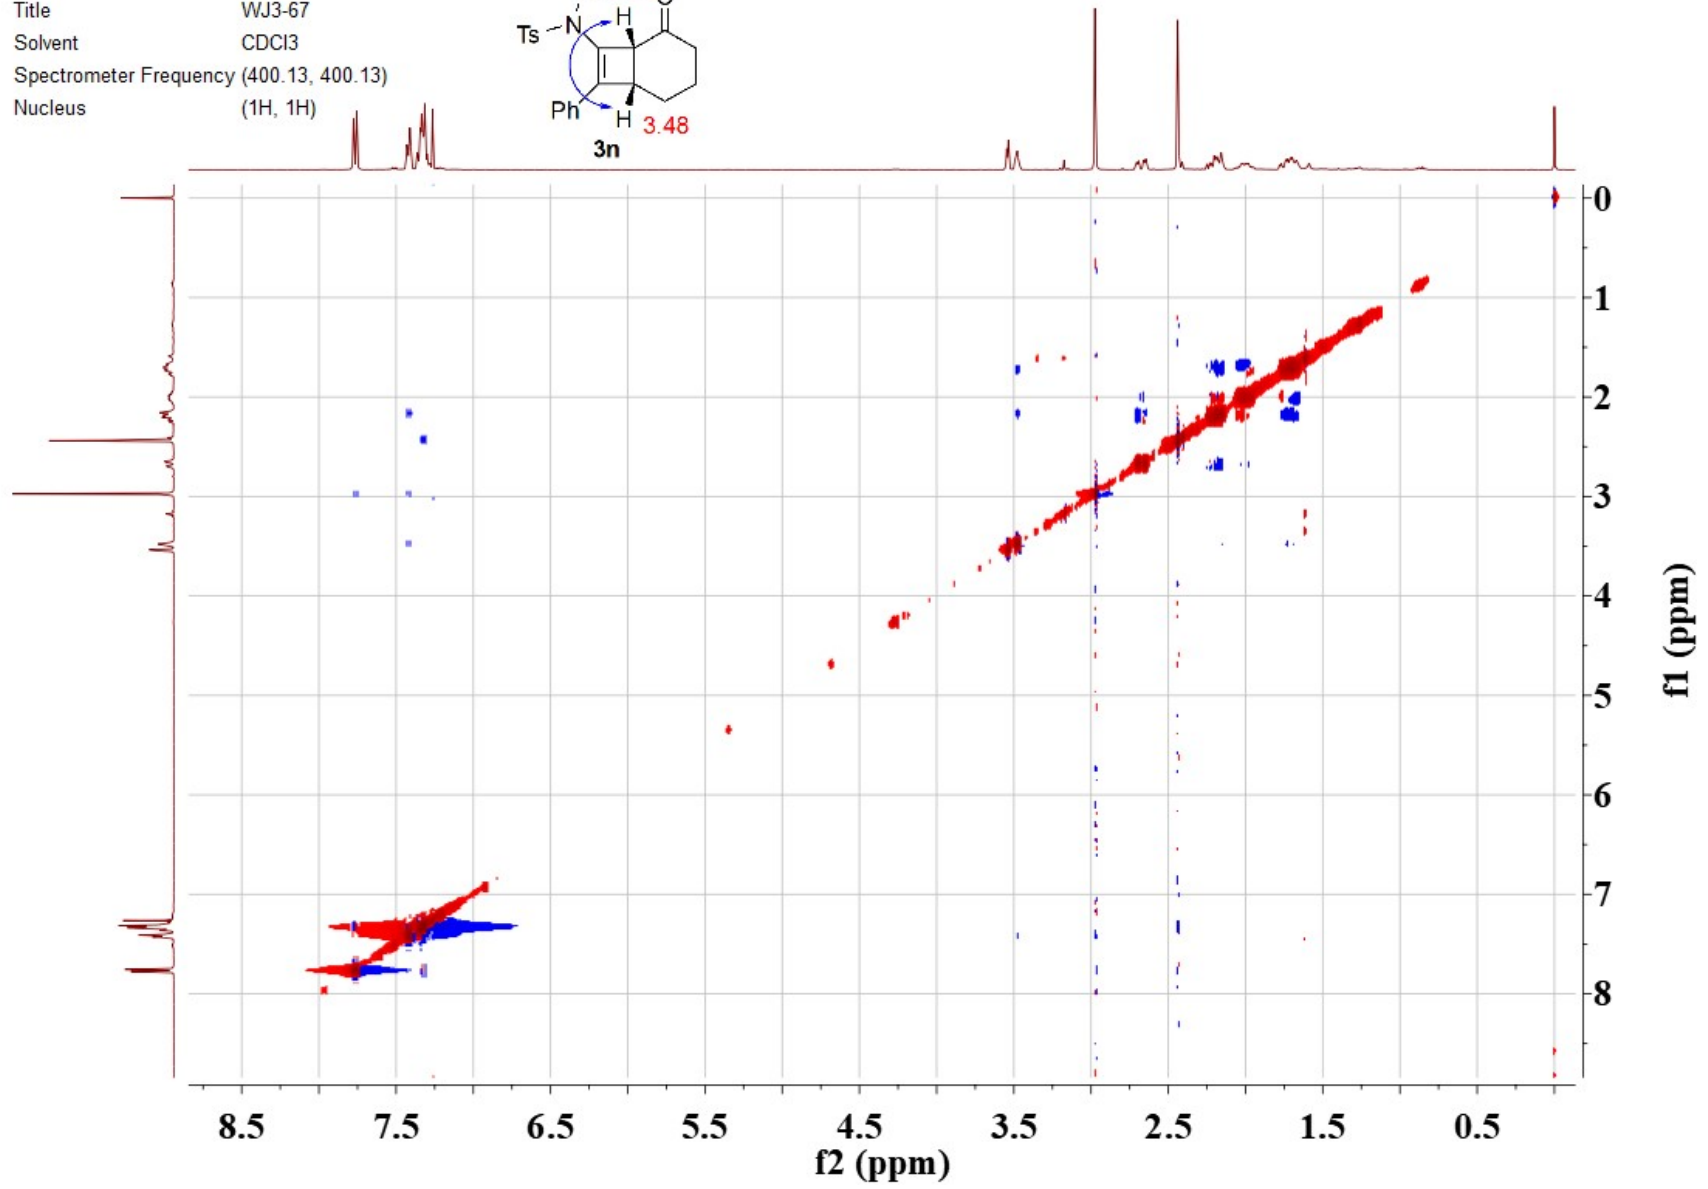

Title WJ3-67  
Solvent CDCl3  
Spectrometer Frequency (400.13, 400.13)  
Nucleus (1H, 1H)

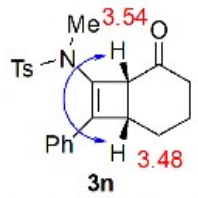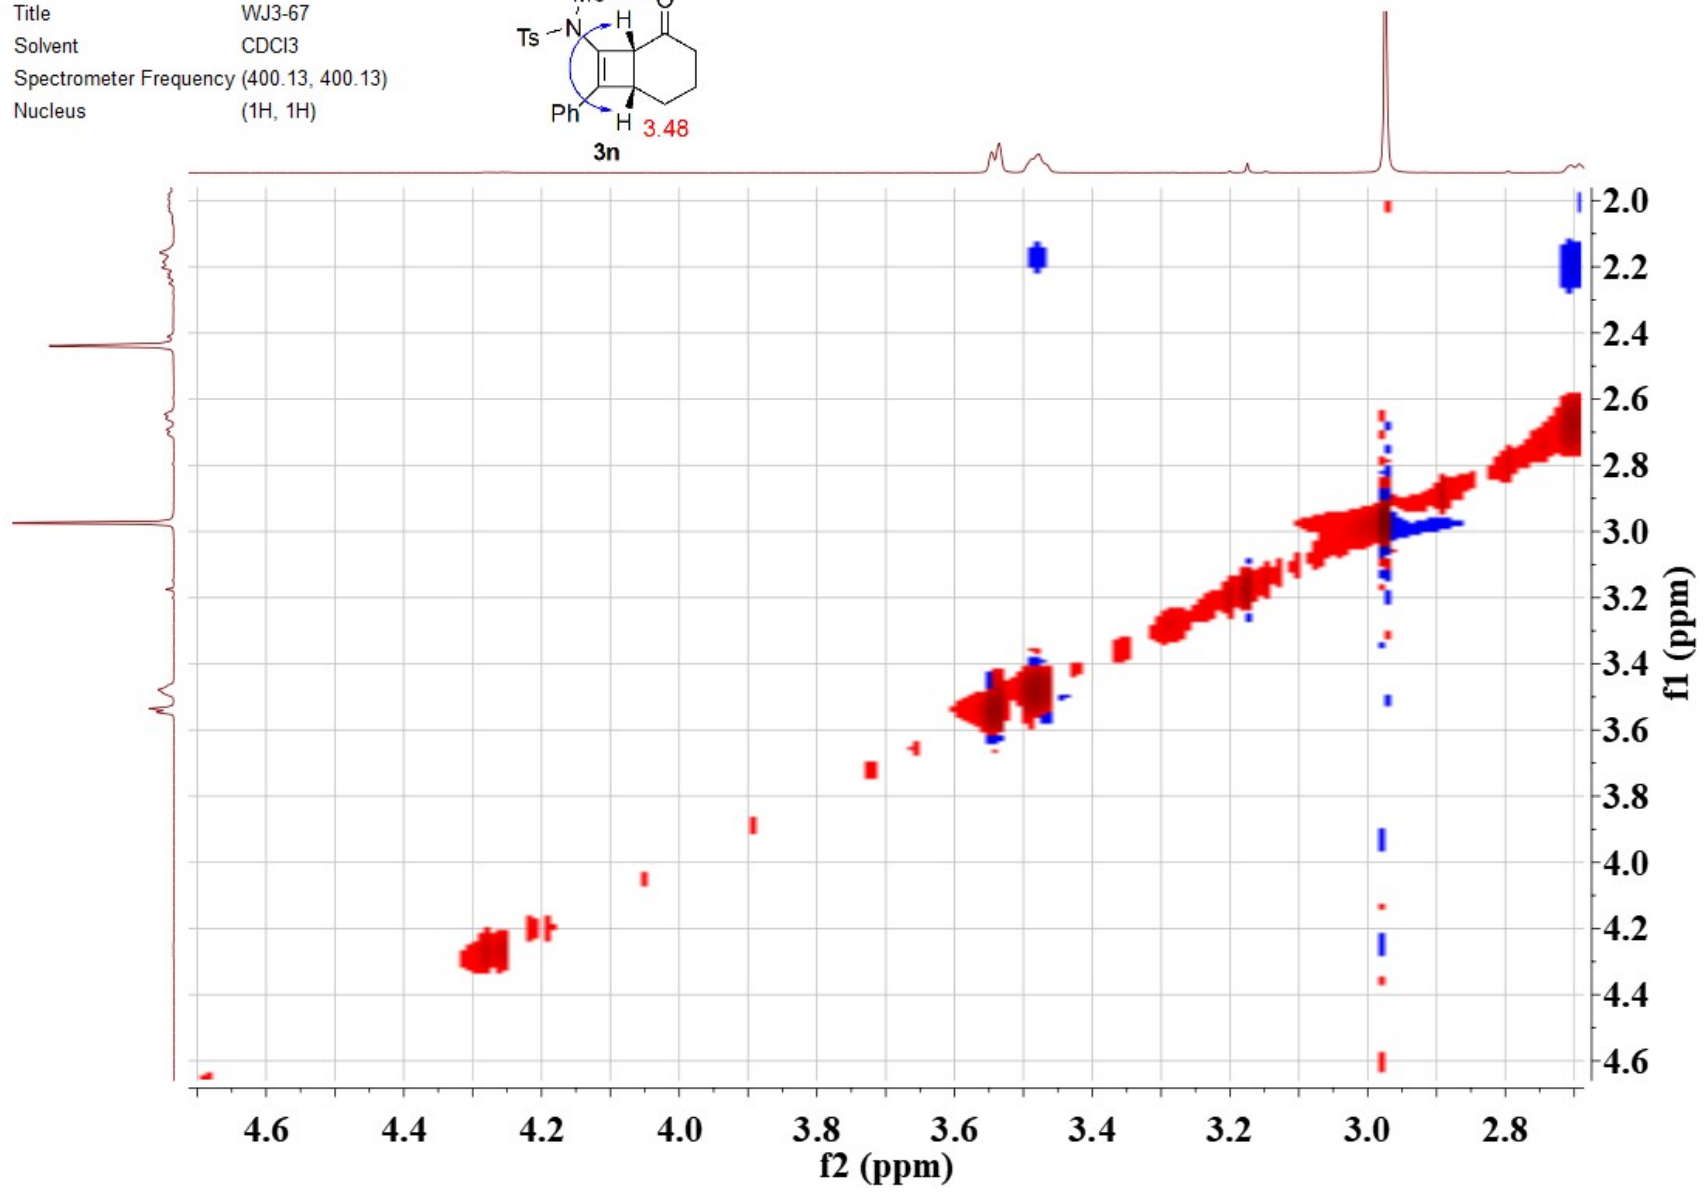

Title WJ4-27  
Solvent CDCl3  
Spectrometer Frequency (400.13, 400.13)  
Nucleus (1H, 1H)

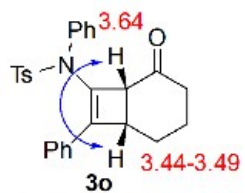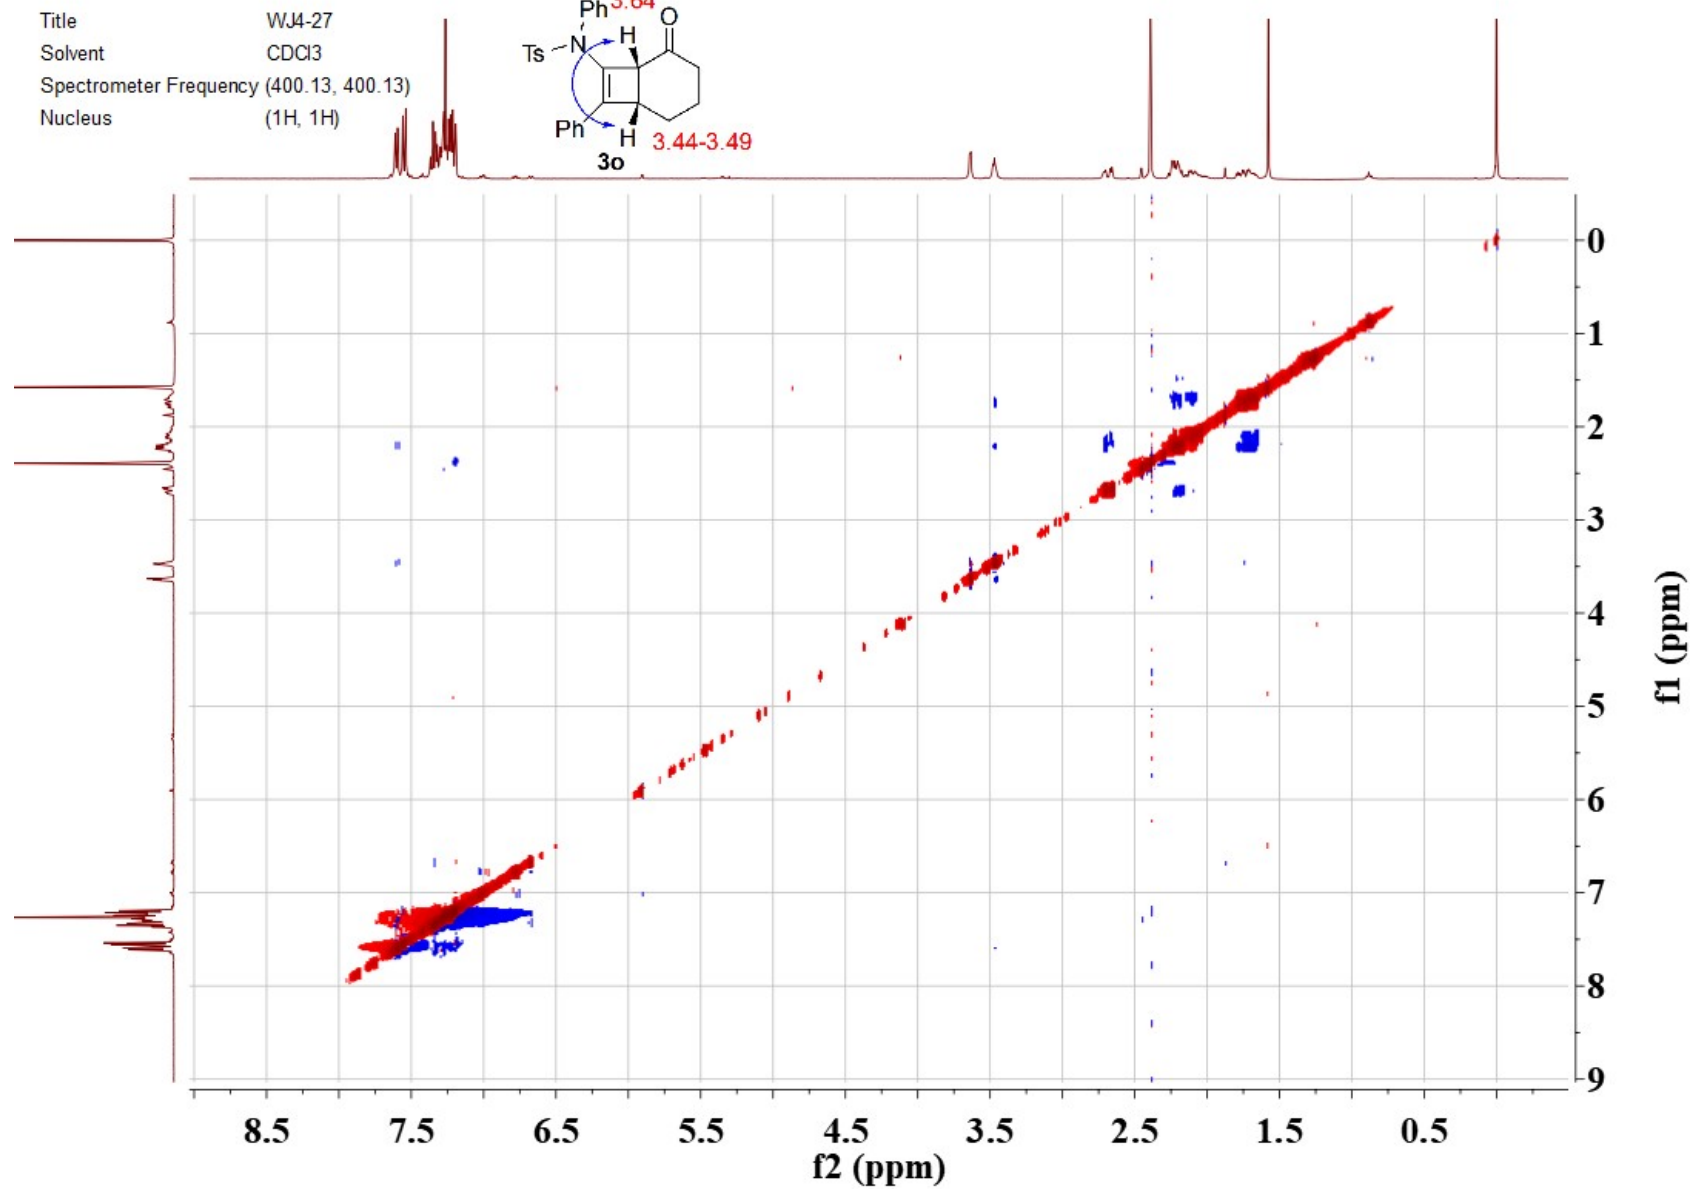

S105

Title WJ4-27  
Solvent CDCl3  
Spectrometer Frequency (400.13, 400.13)  
Nucleus (1H, 1H)

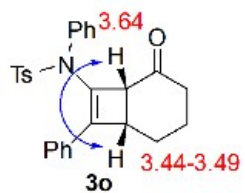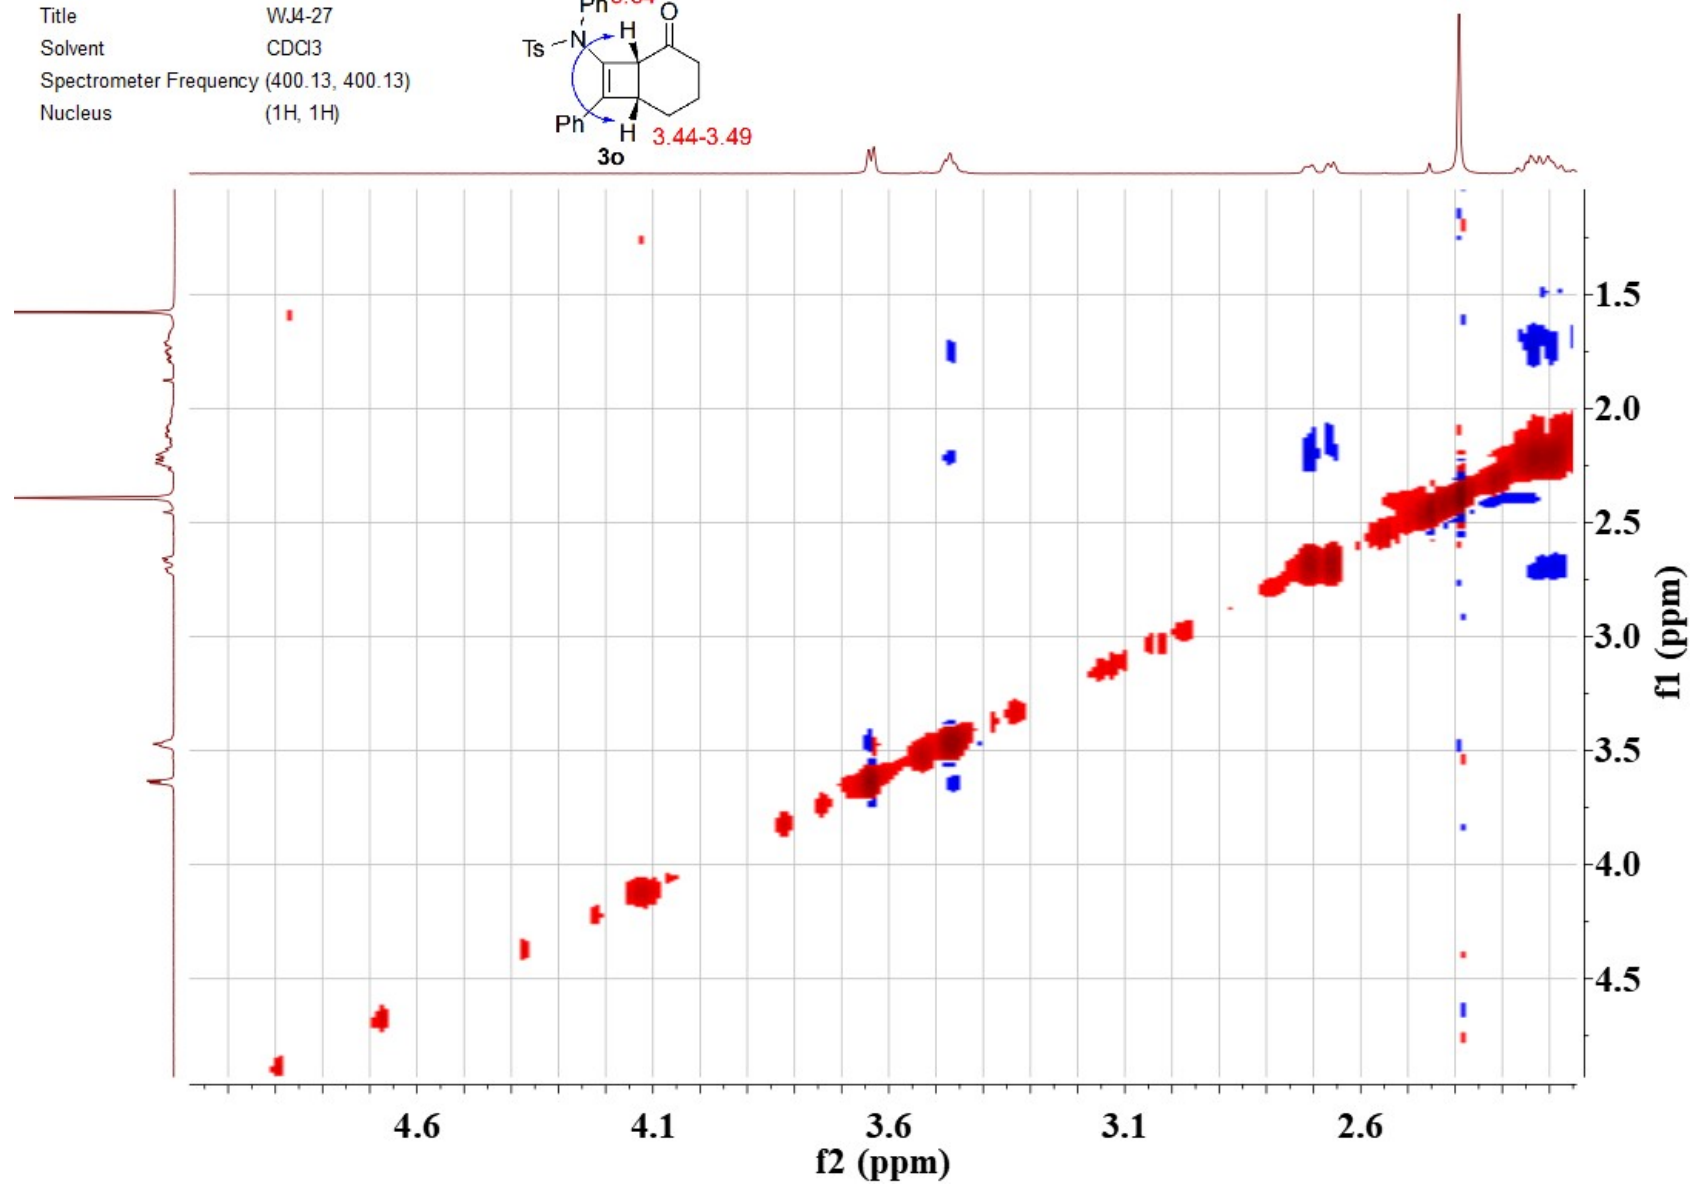

S106

Title WJ4-46  
Solvent CDCl3  
Spectrometer Frequency (400.13, 400.13)  
Nucleus (1H, 1H)

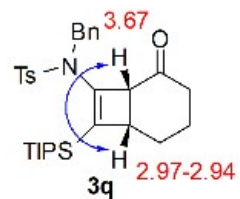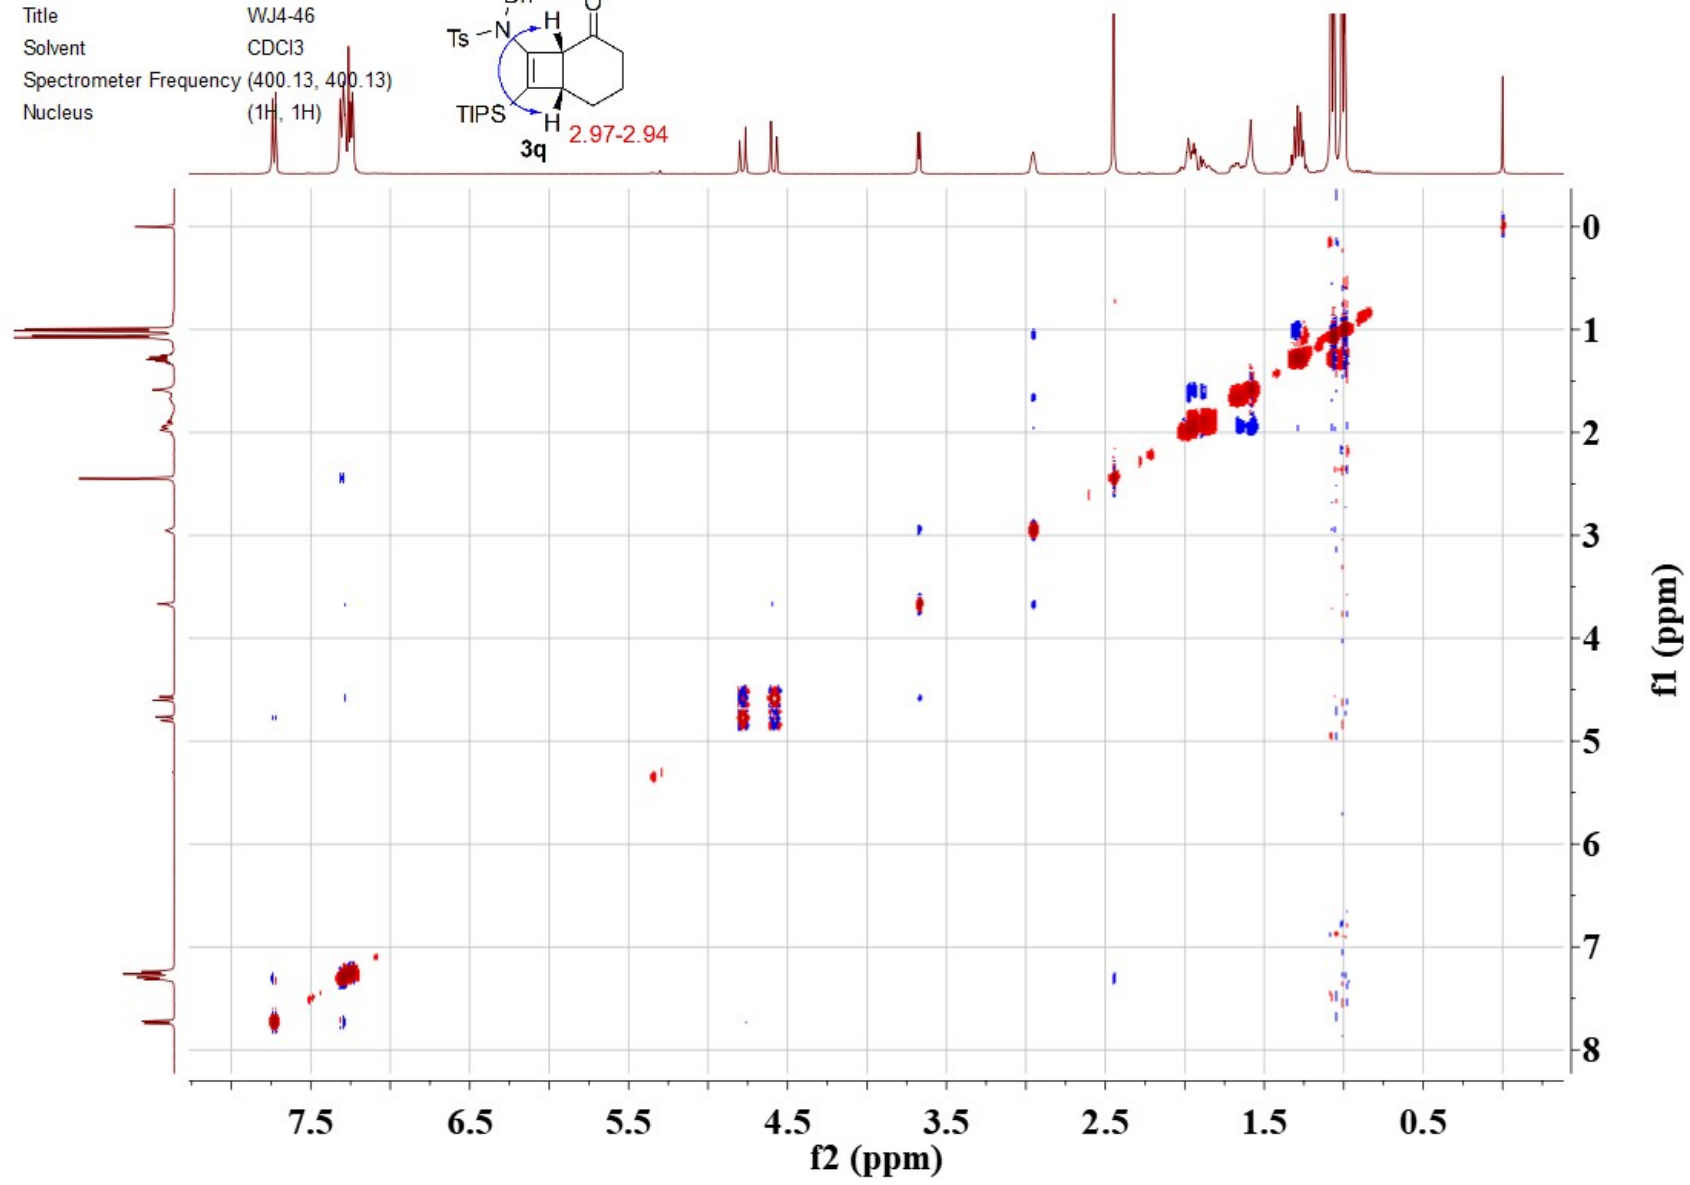

S107



Title WJ4-46  
Solvent CDCl3  
Spectrometer Frequency (400.13, 400.13)  
Nucleus (1H, 1H)

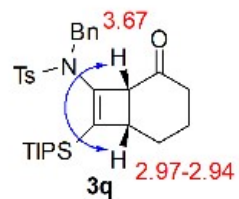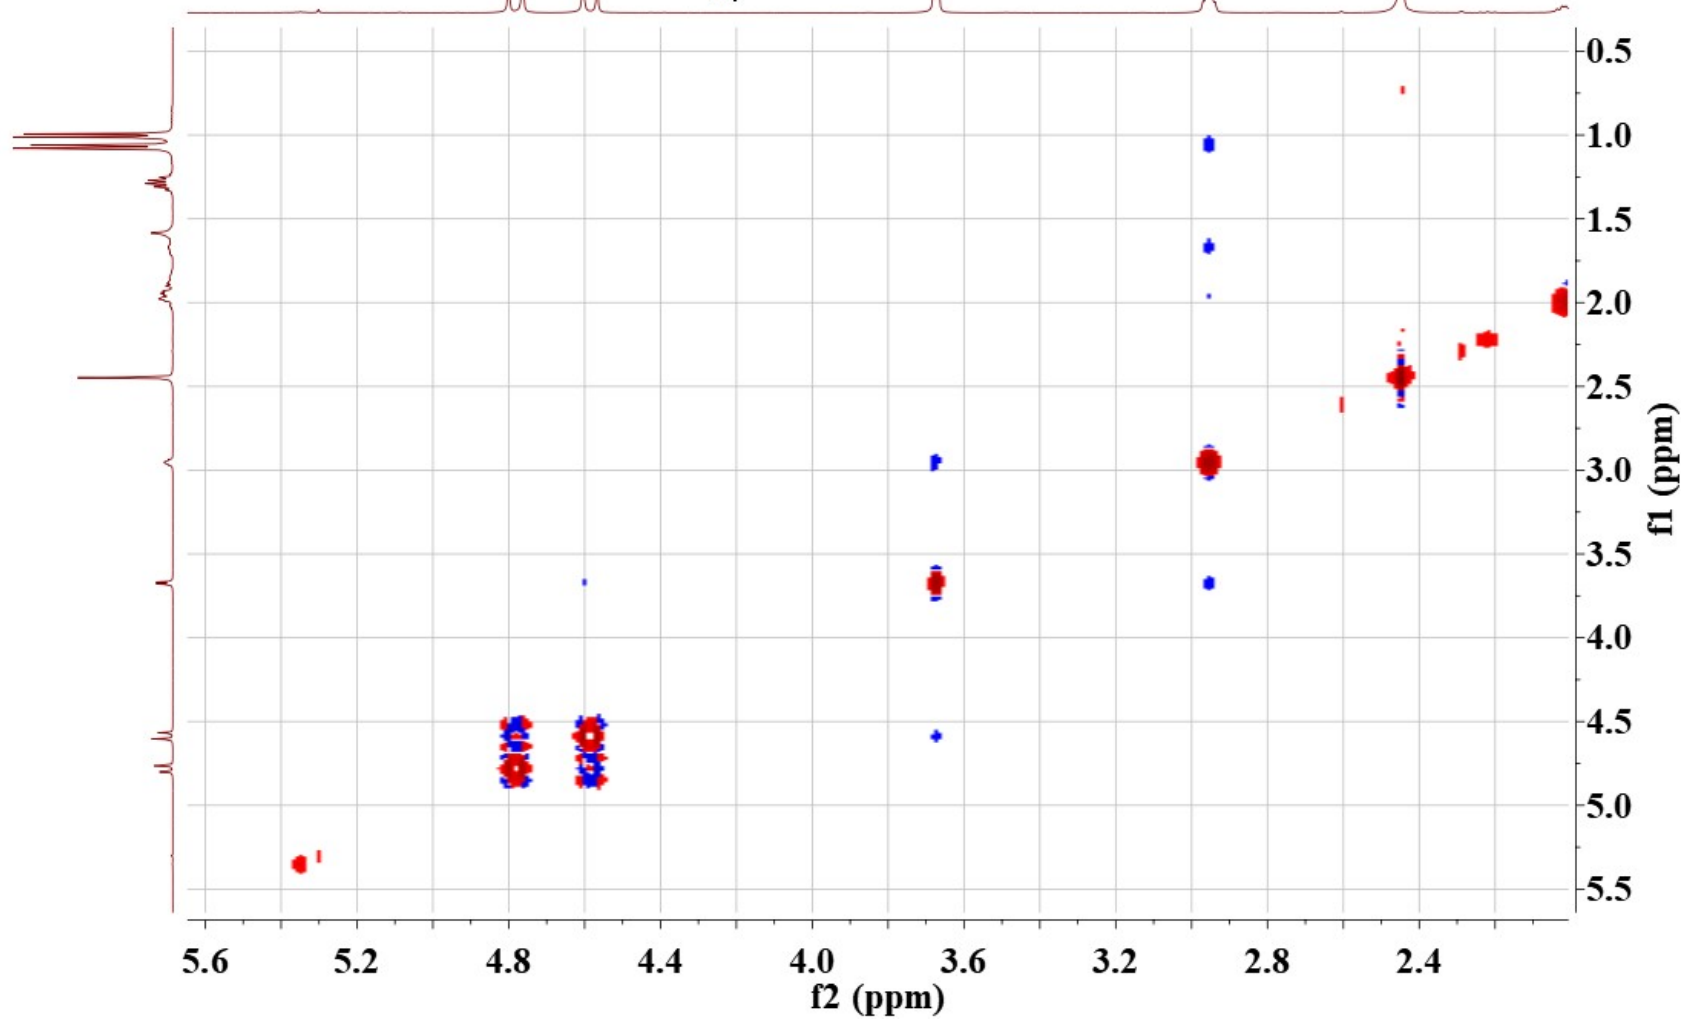

S108

Title WJ4-44  
Solvent CDCl3  
Spectrometer Frequency (400.13, 400.13)  
Nucleus (1H, 1H)

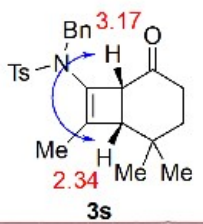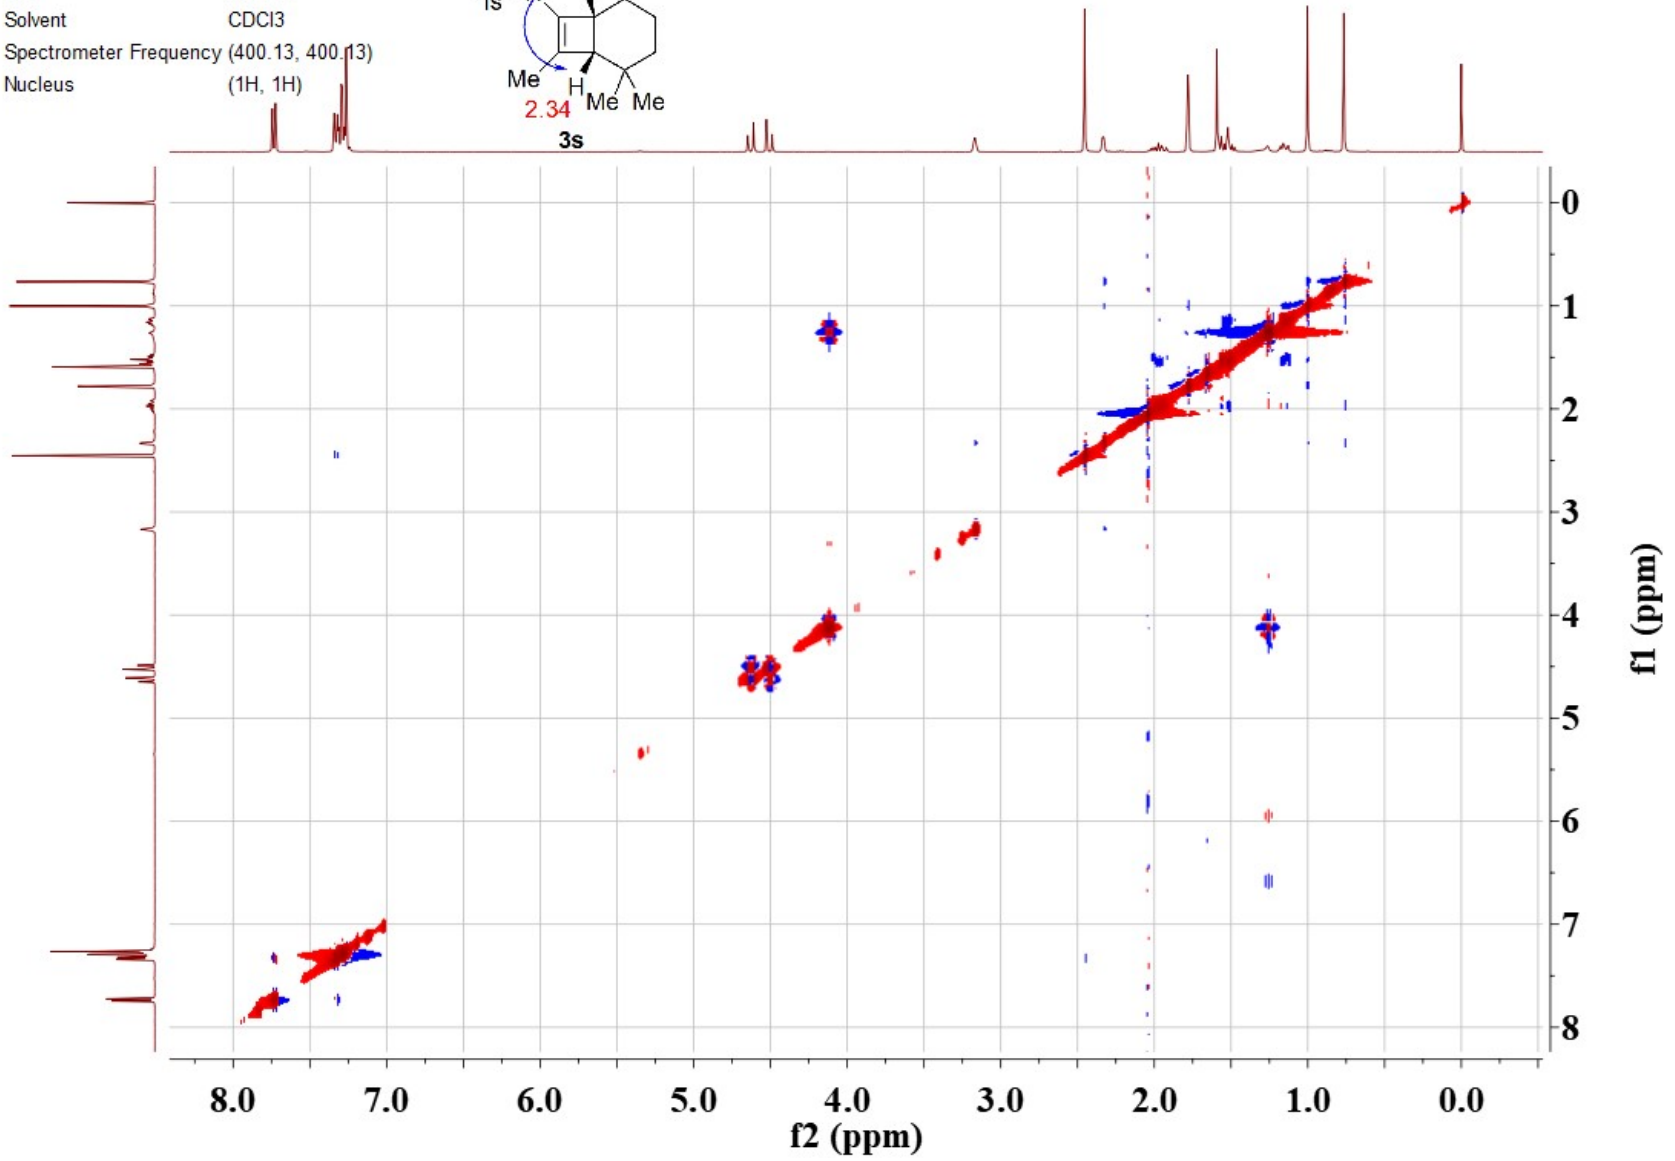

Title WJ4-44  
Solvent CDCl3  
Spectrometer Frequency (400.13, 400.13)  
Nucleus (1H, 1H)

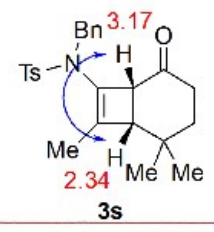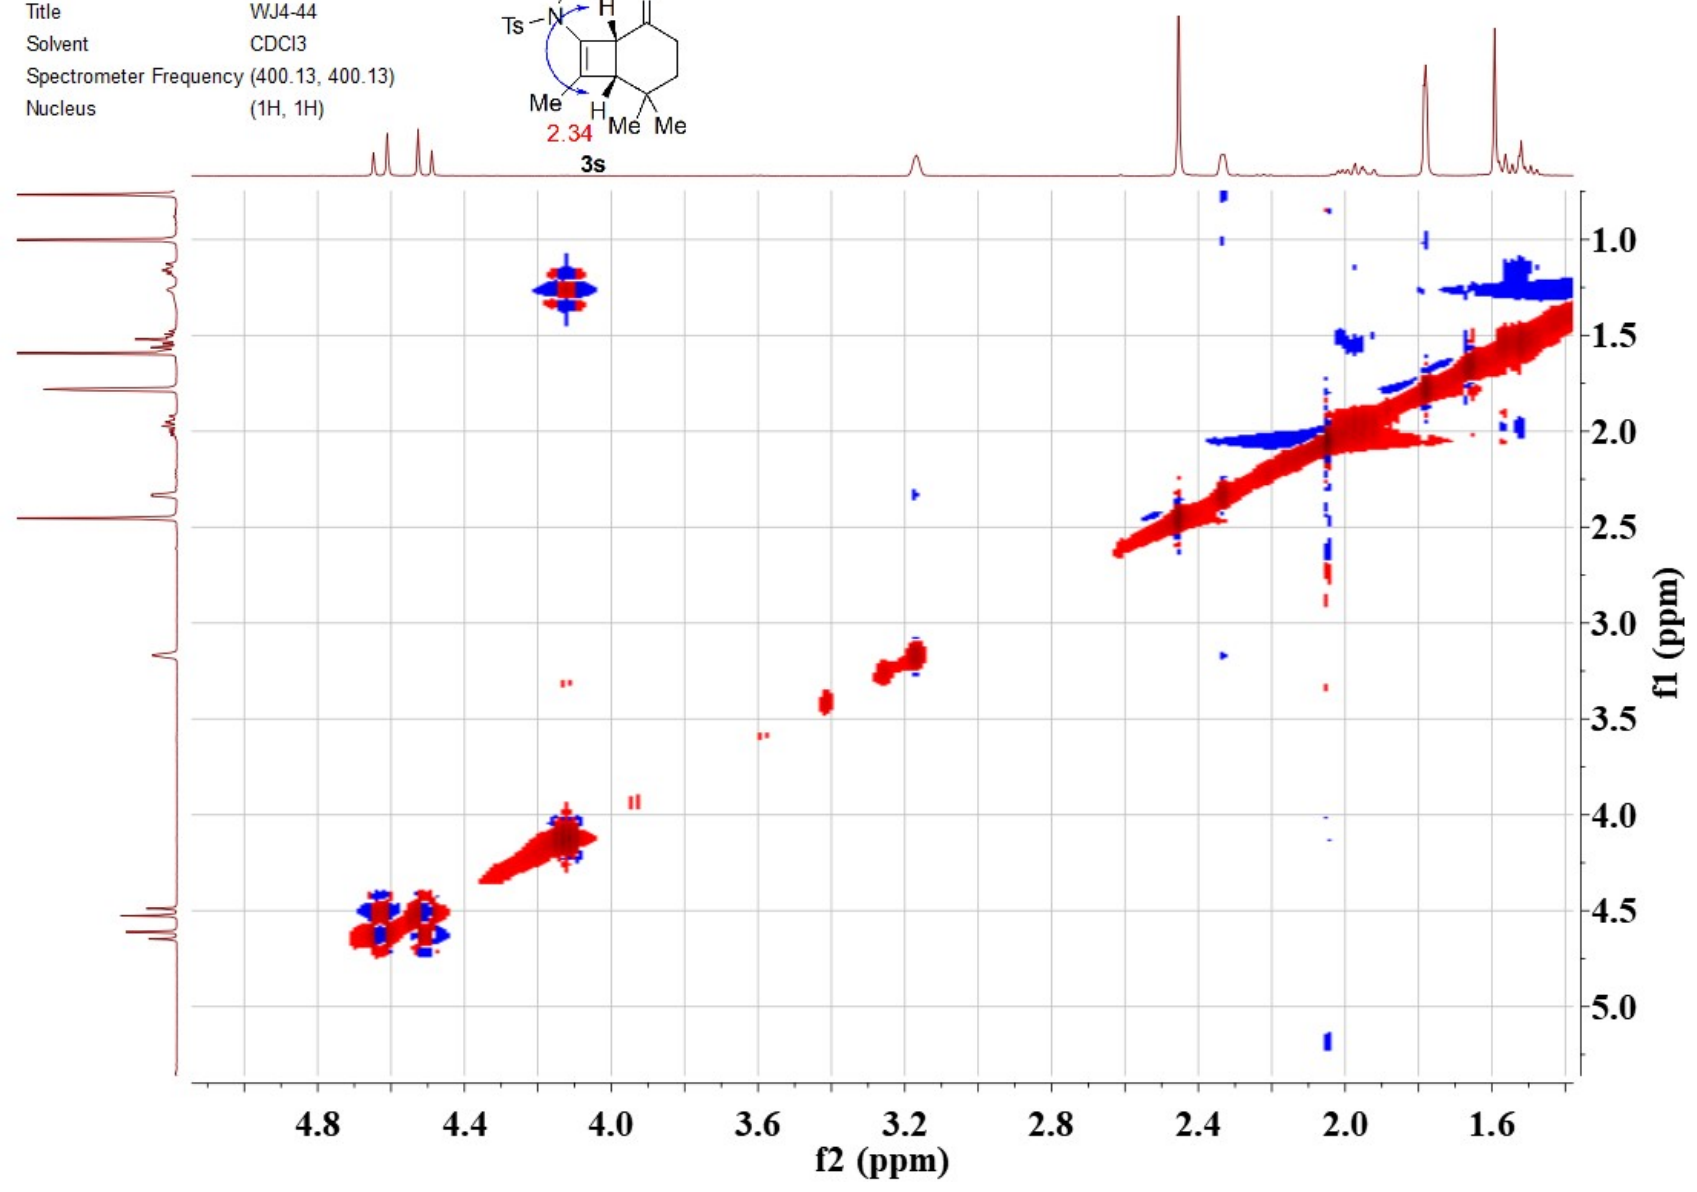

Title WJ3-80  
Solvent CDCl3  
Spectrometer Frequency (400.13, 400.13)  
Nucleus (1H, 1H)

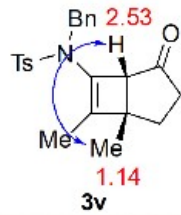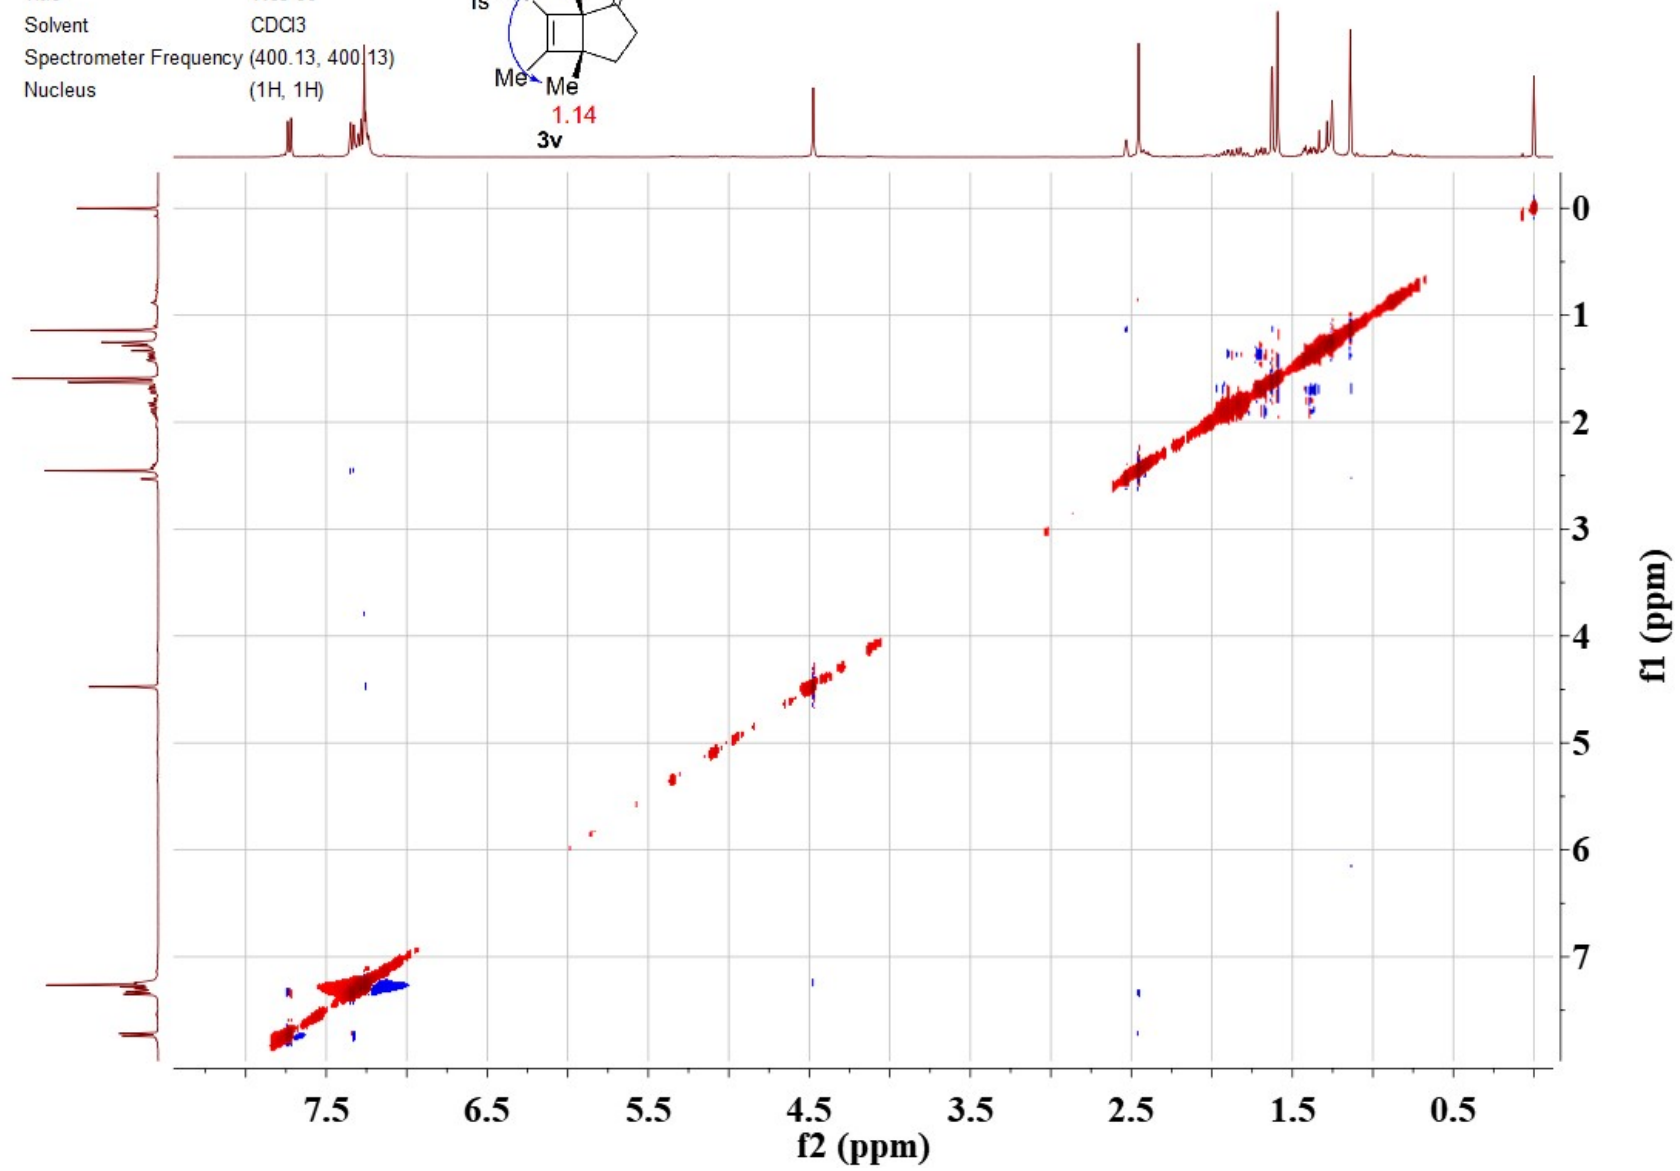

S111

Title WJ3-80  
Solvent CDCl3  
Spectrometer Frequency (400.13, 400.13)  
Nucleus (1H, 1H)

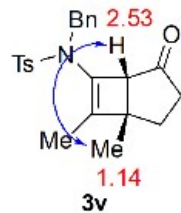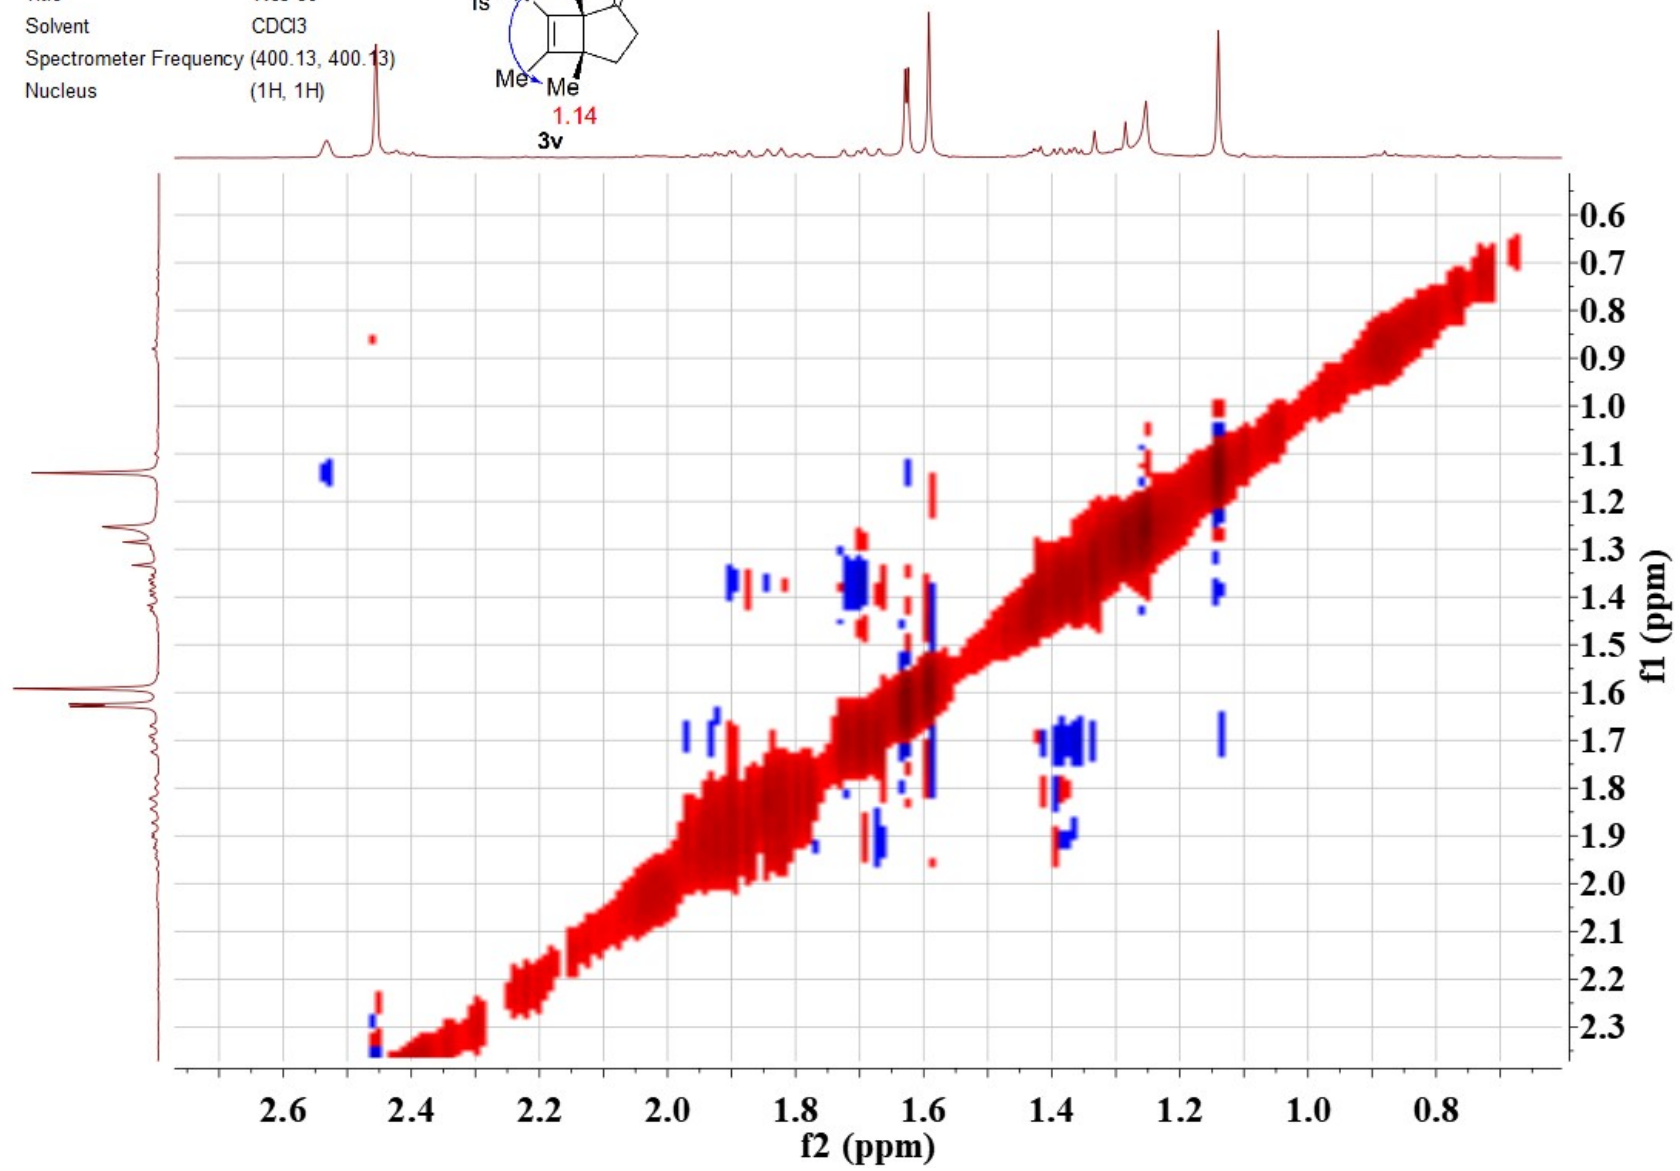

S112

Title WJ4-25-2  
Solvent CDCl3  
Spectrometer Frequency (400.13, 400.13)  
Nucleus (1H, 1H)

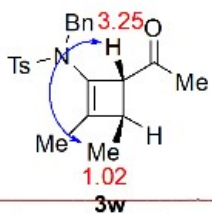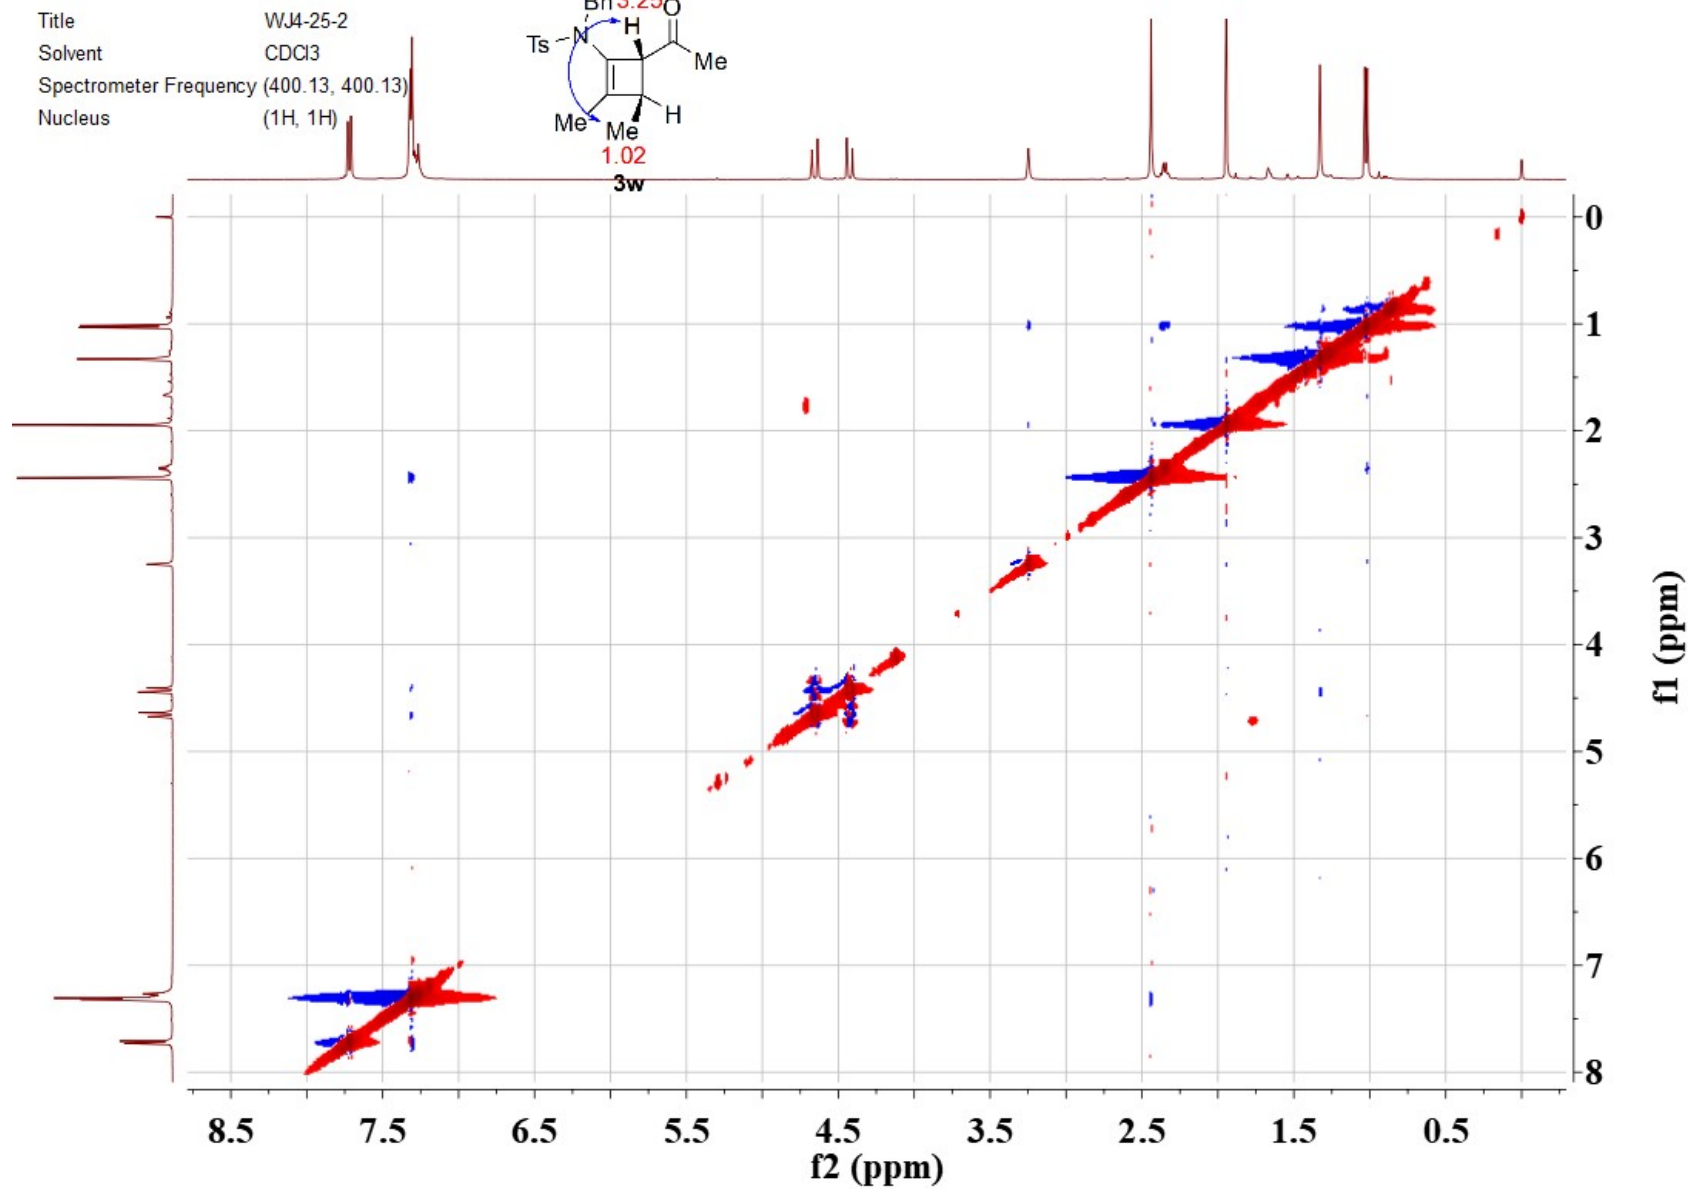

S113

Title WJ4-25-2  
Solvent CDCl3  
Spectrometer Frequency (400.13, 400.13)  
Nucleus (1H, 1H)

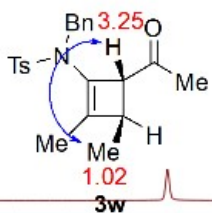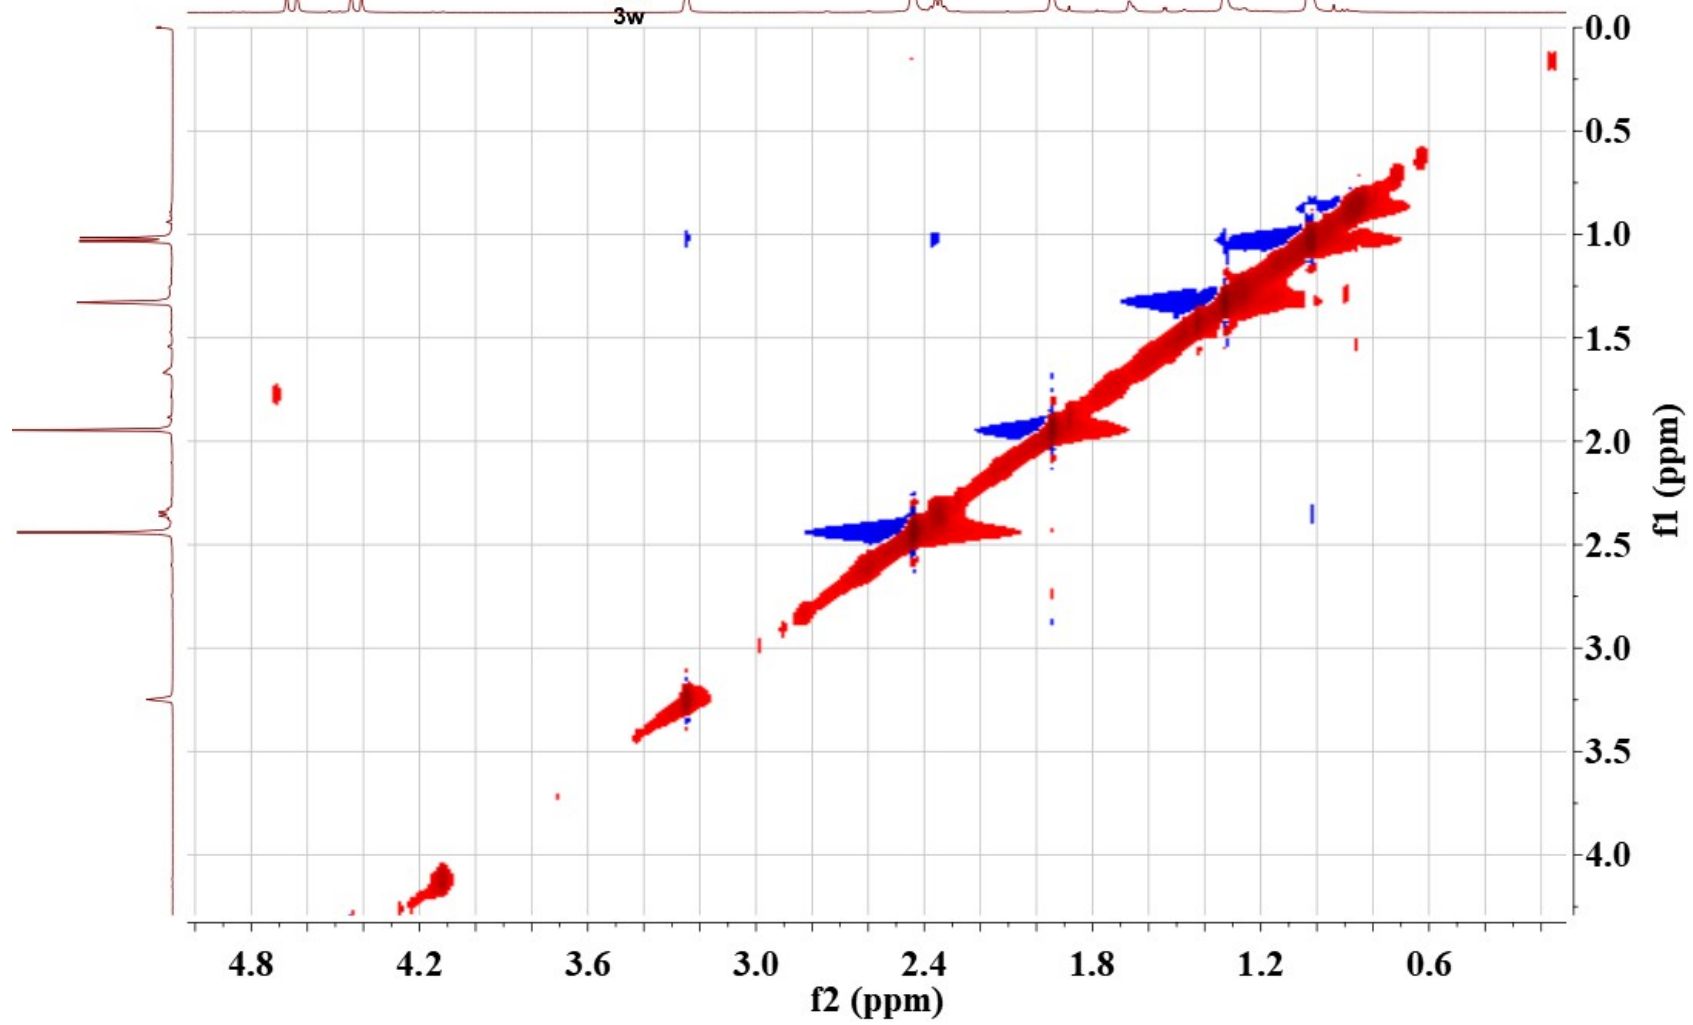

S114



Title WJ4-35  
Solvent CDCl3  
Spectrometer Frequency (400.13, 400.13)  
Nucleus (1H, 1H)

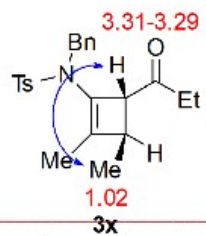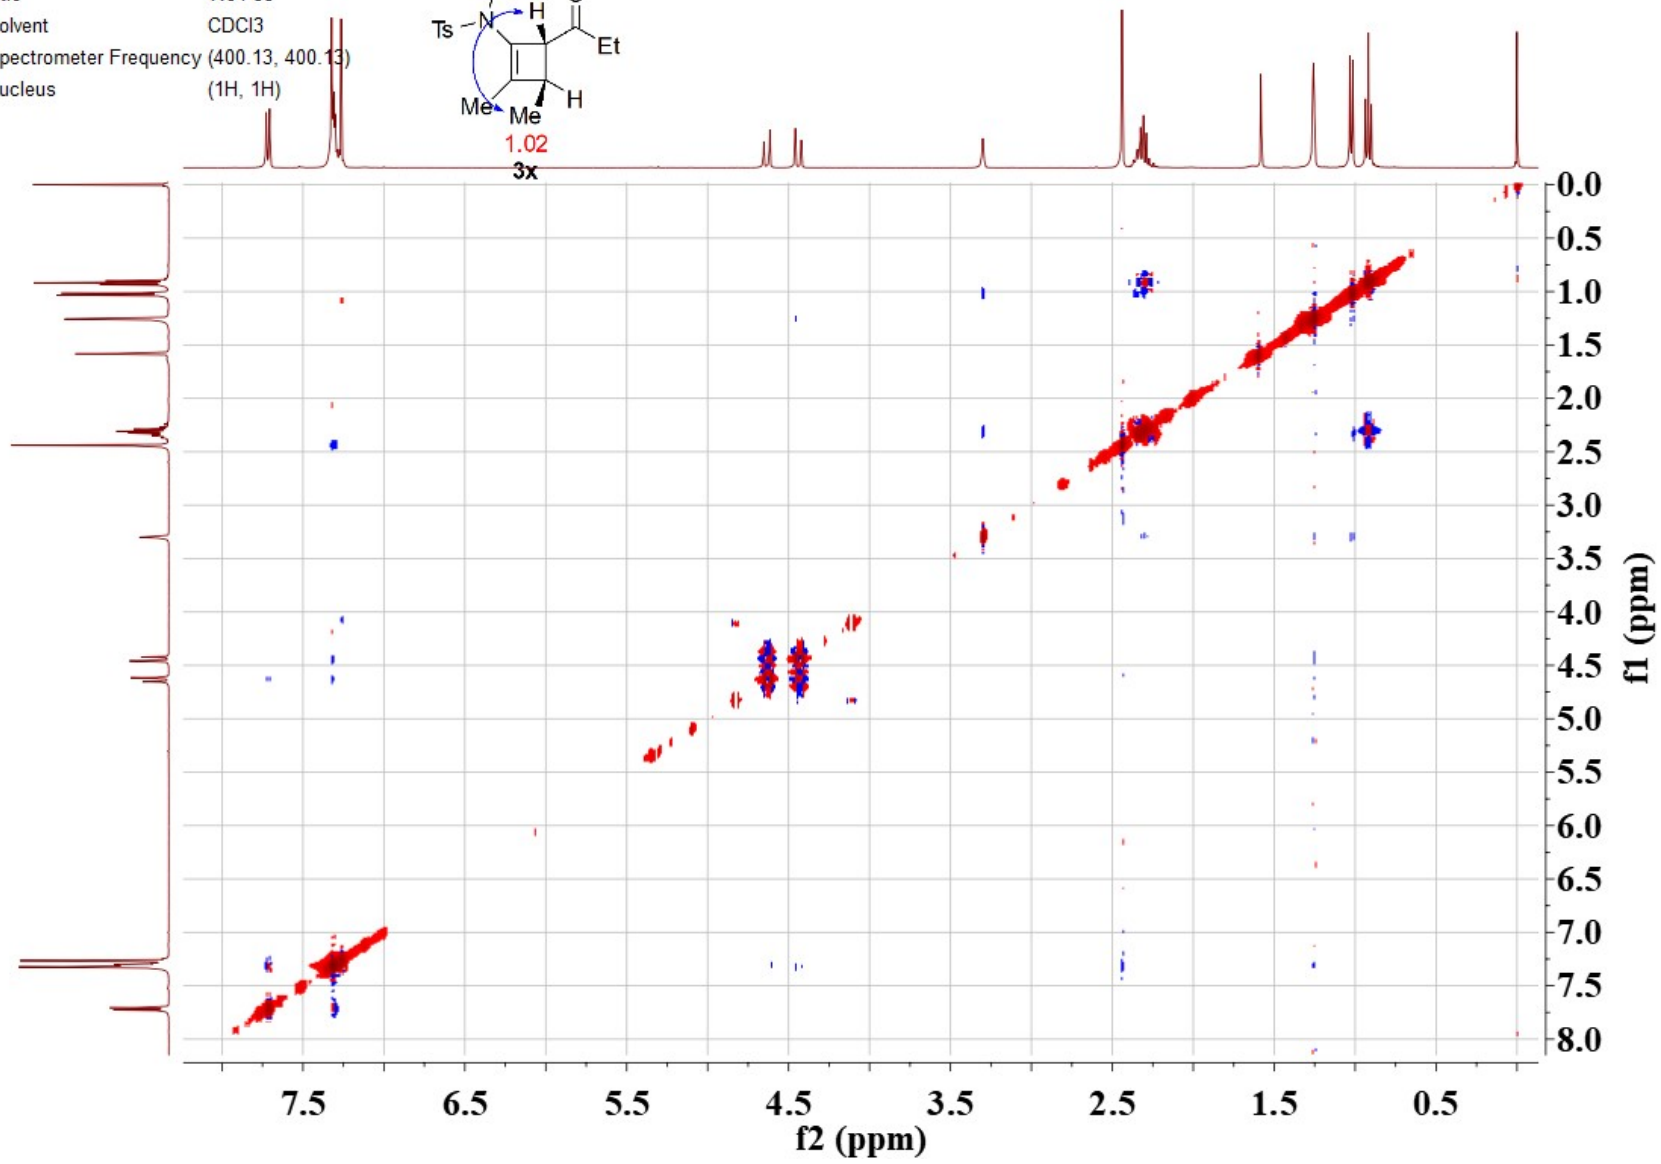

S115

Title WJ4-35  
Solvent CDCl3  
Spectrometer Frequency (400.13, 400.13)  
Nucleus (1H, 1H)

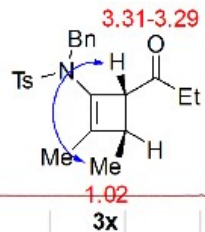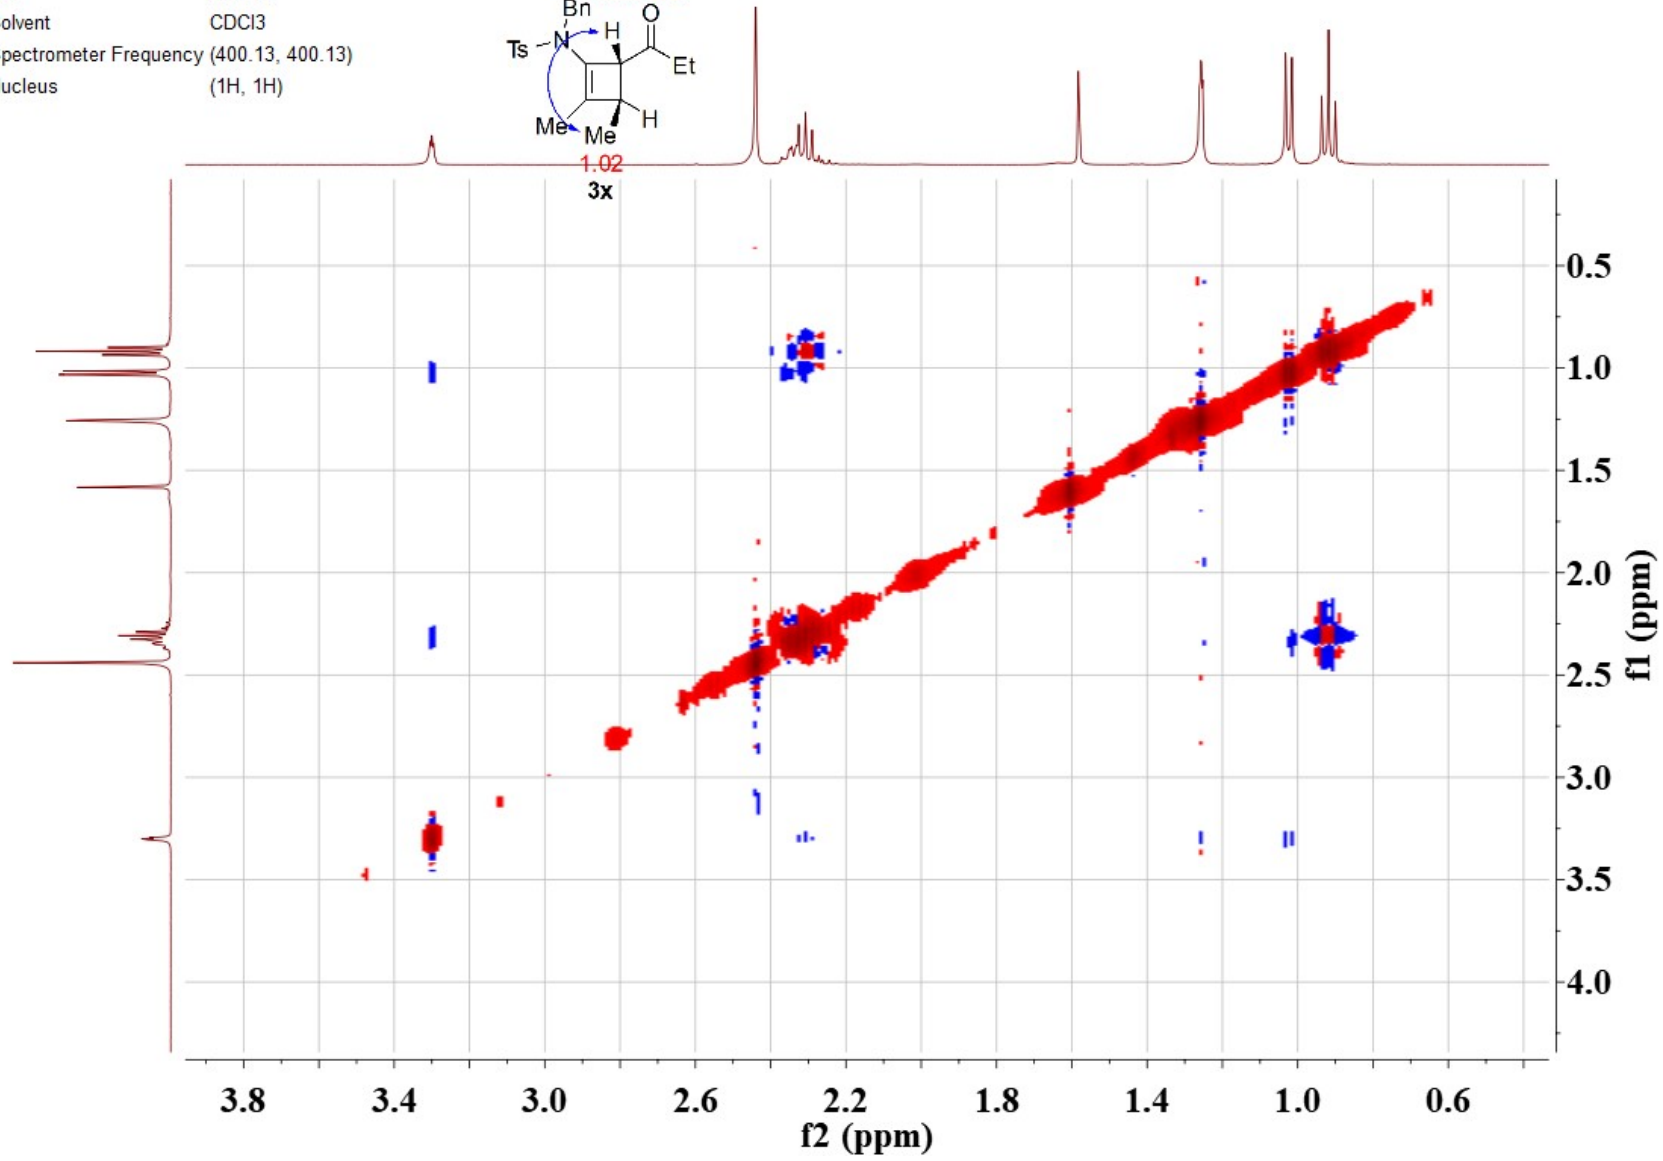

S116

# NOESY, COSY, HSQC, and HMBC Spectra of Cyclobutenamides 3y and 3z.

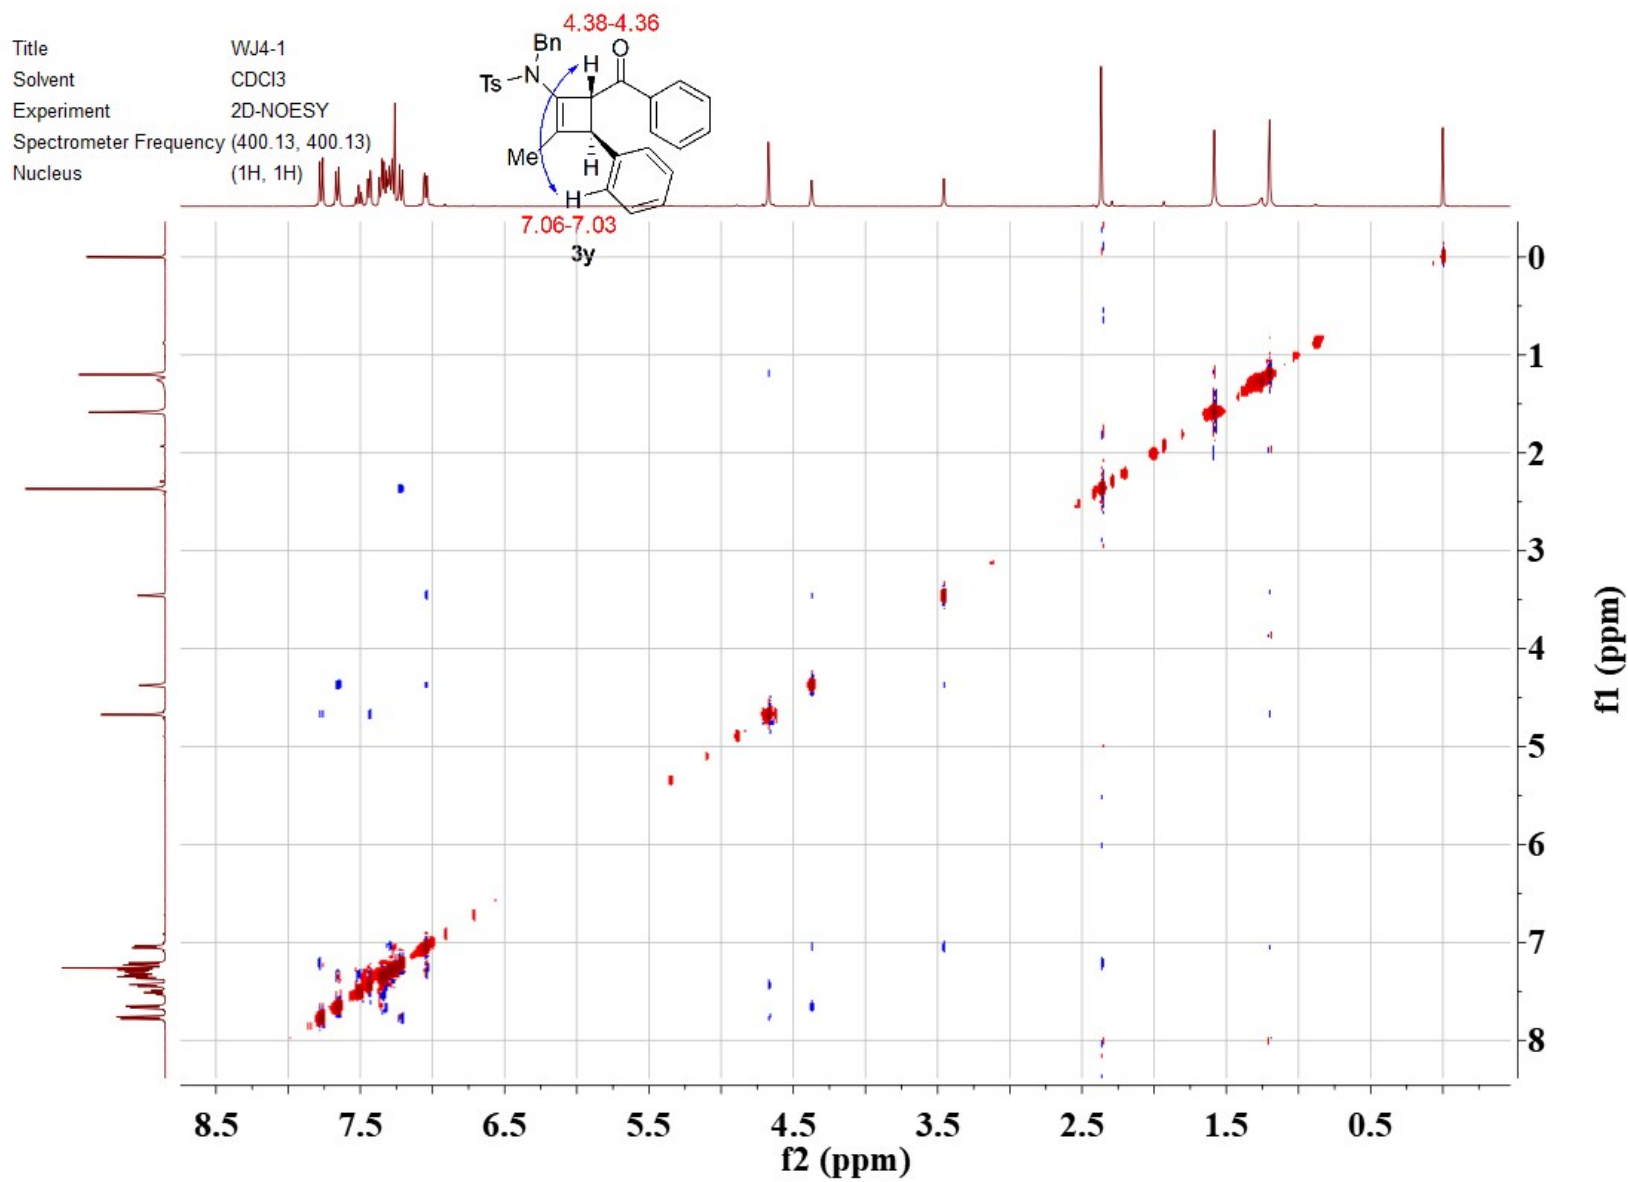

Title WJ4-1  
Solvent CDCl3  
Experiment 2D-NOESY  
Spectrometer Frequency (400.13, 400.13)  
Nucleus (1H, 1H)

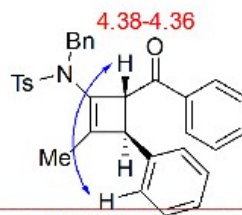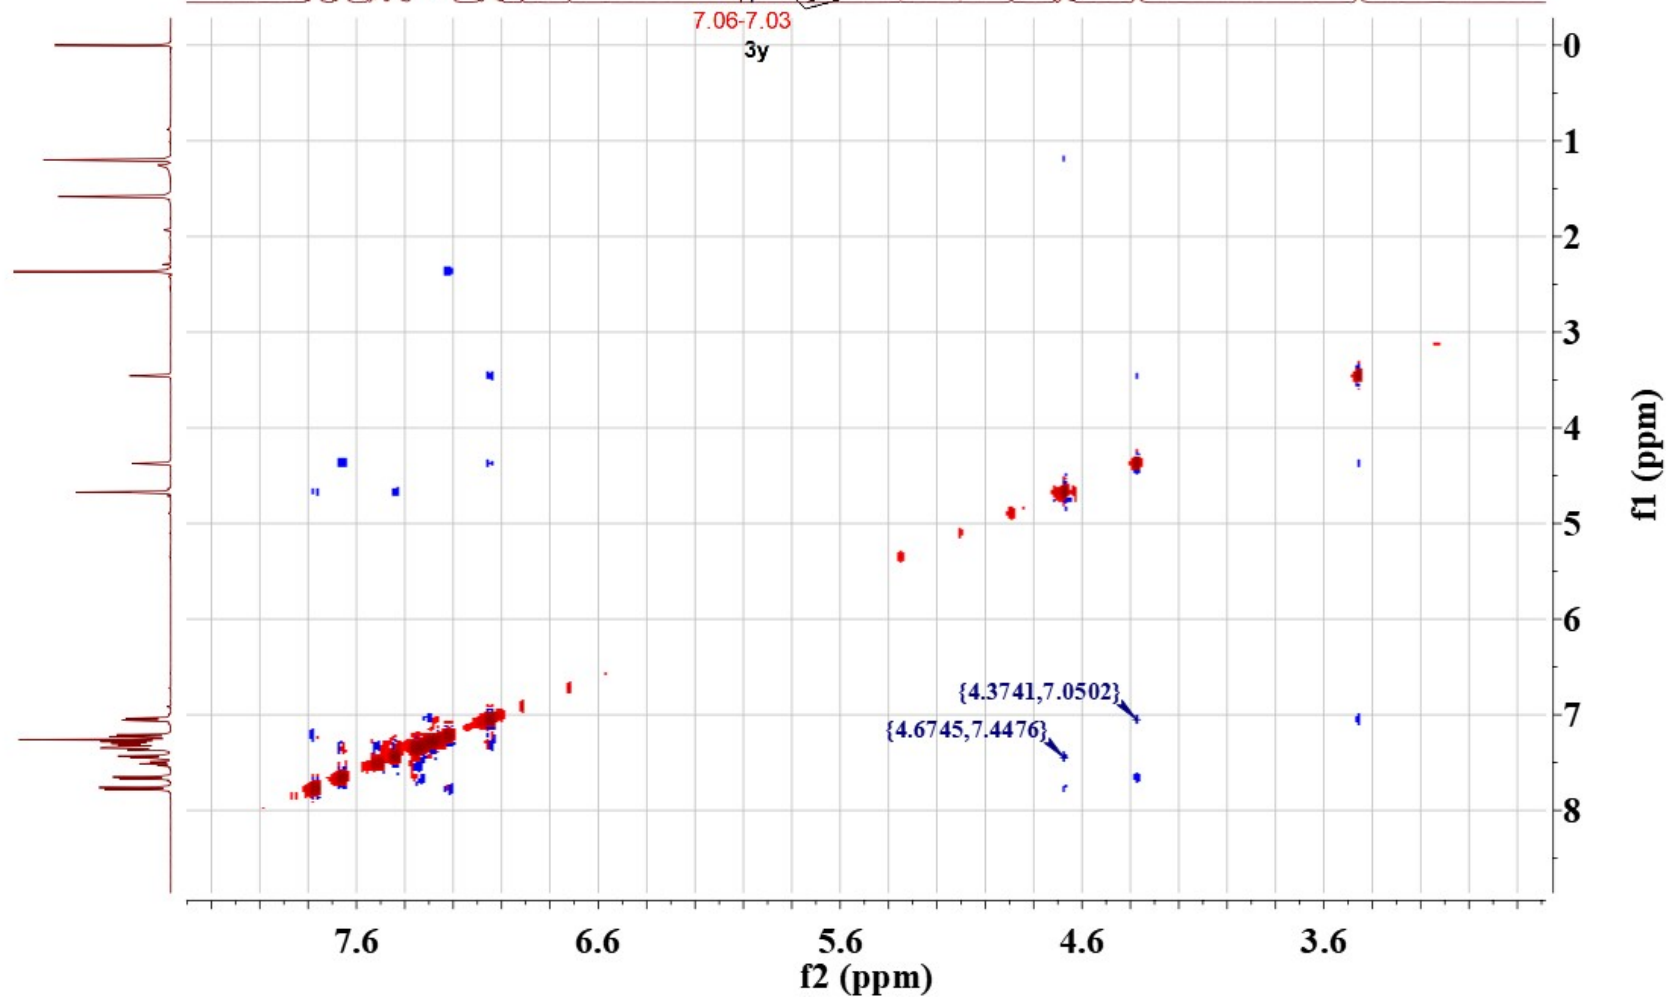

Title WJ4-1  
Solvent CDCl3  
Experiment 2D-COSY  
Spectrometer Frequency (400.13, 400.13)  
Nucleus (1H, 1H)

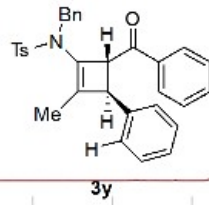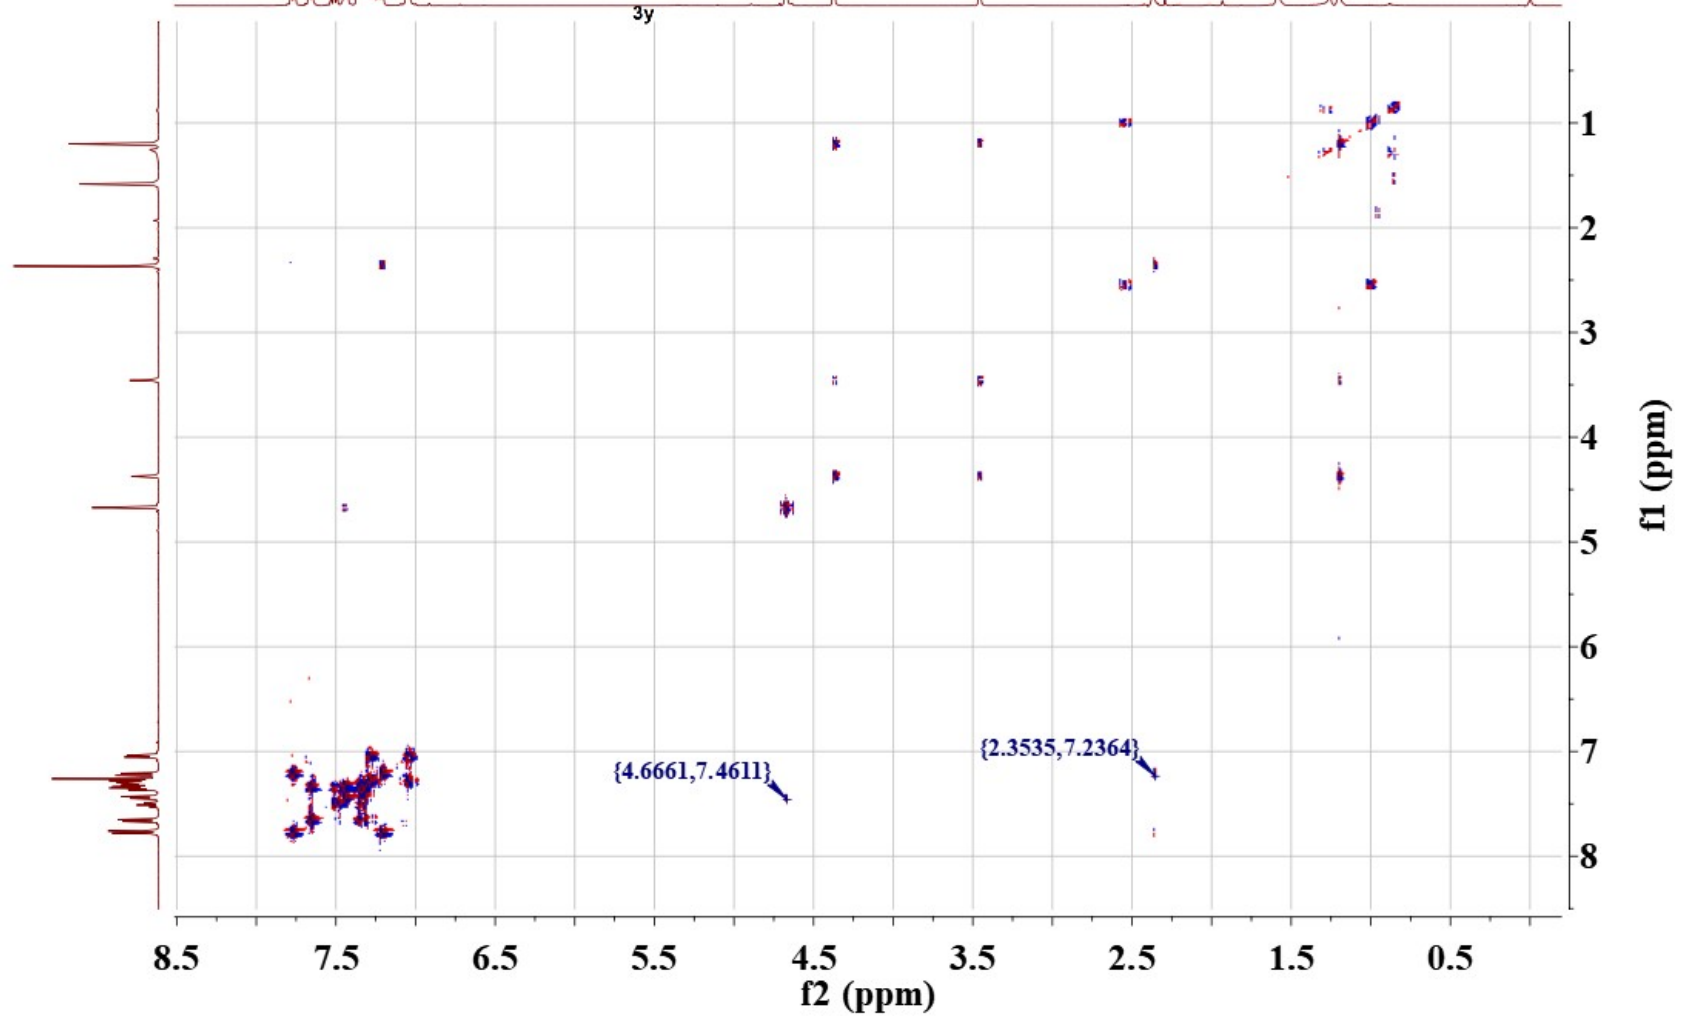

S119

Title WJ4-1  
Solvent CDCl3  
Experiment 2D-COSY  
Spectrometer Frequency (400.13, 400.13)  
Nucleus (1H, 1H)

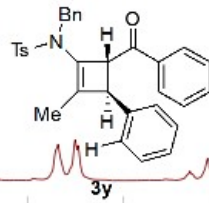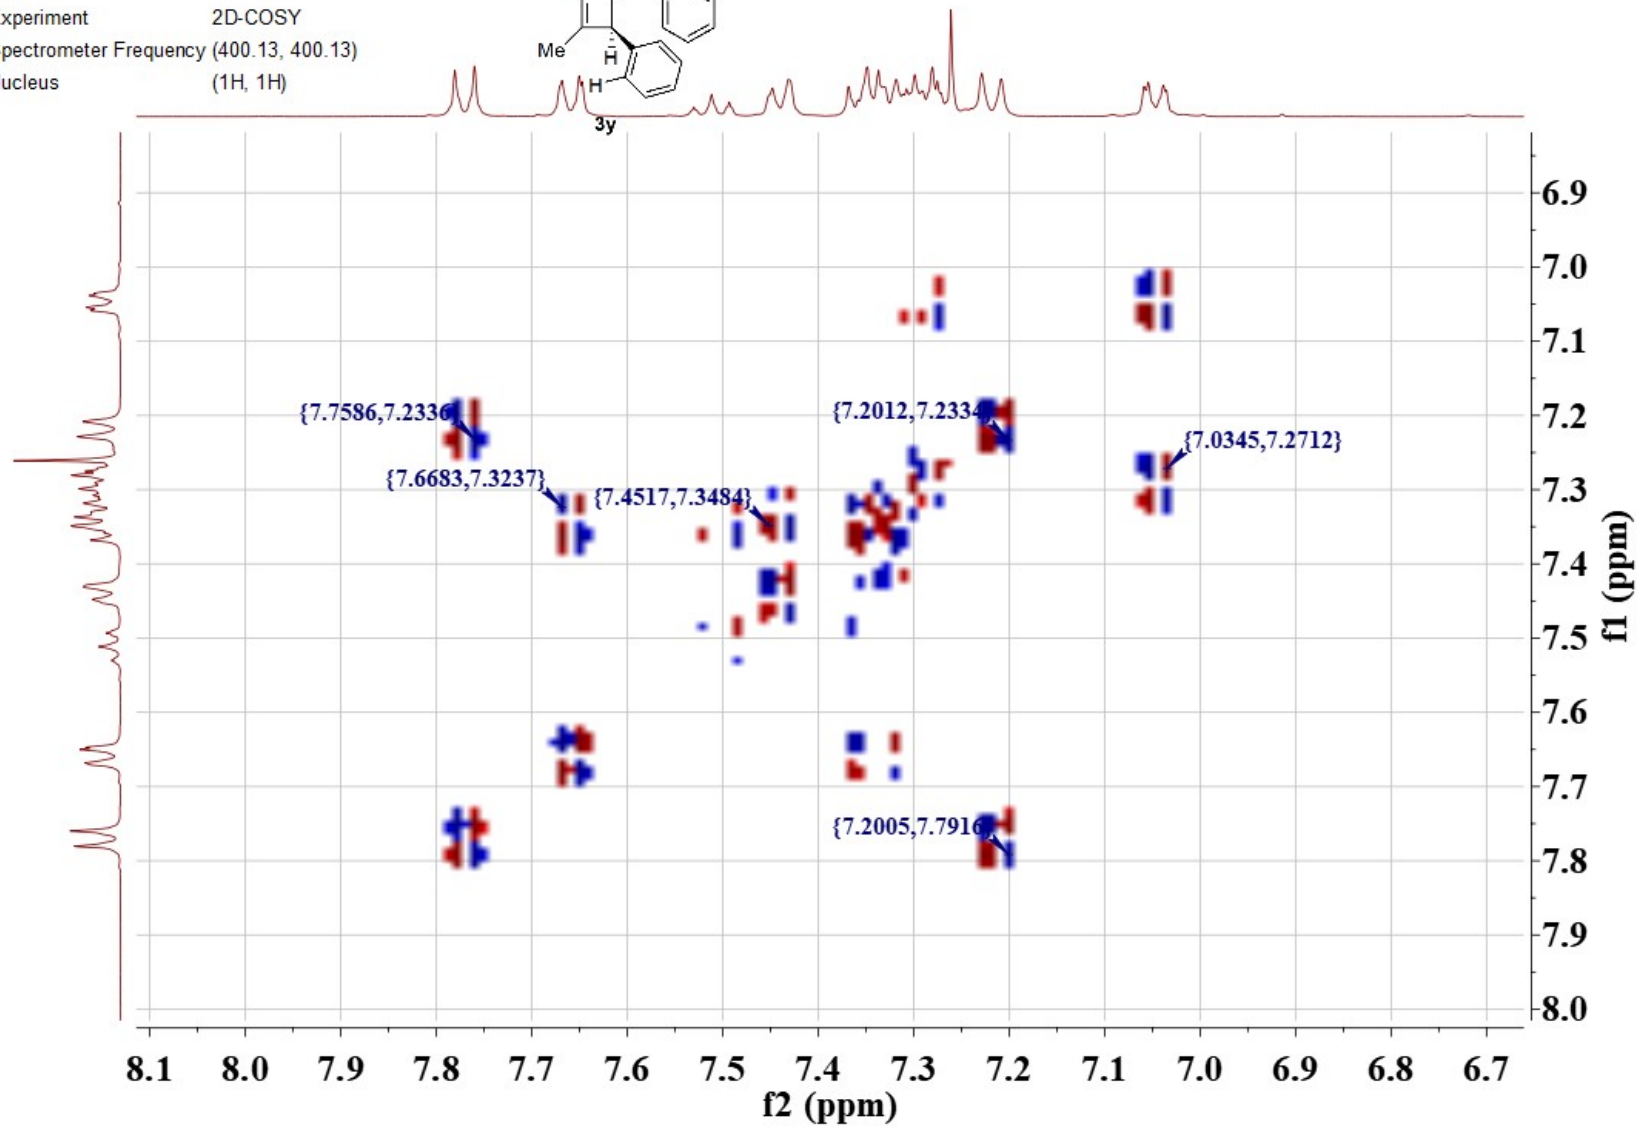

Title WJ4-1  
Solvent CDCl3  
Experiment 2D-HSQC-EDITED  
Spectrometer Frequency (400.13, 100.61)  
Nucleus (1H, 13C)

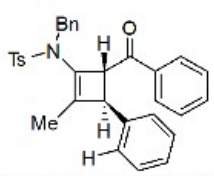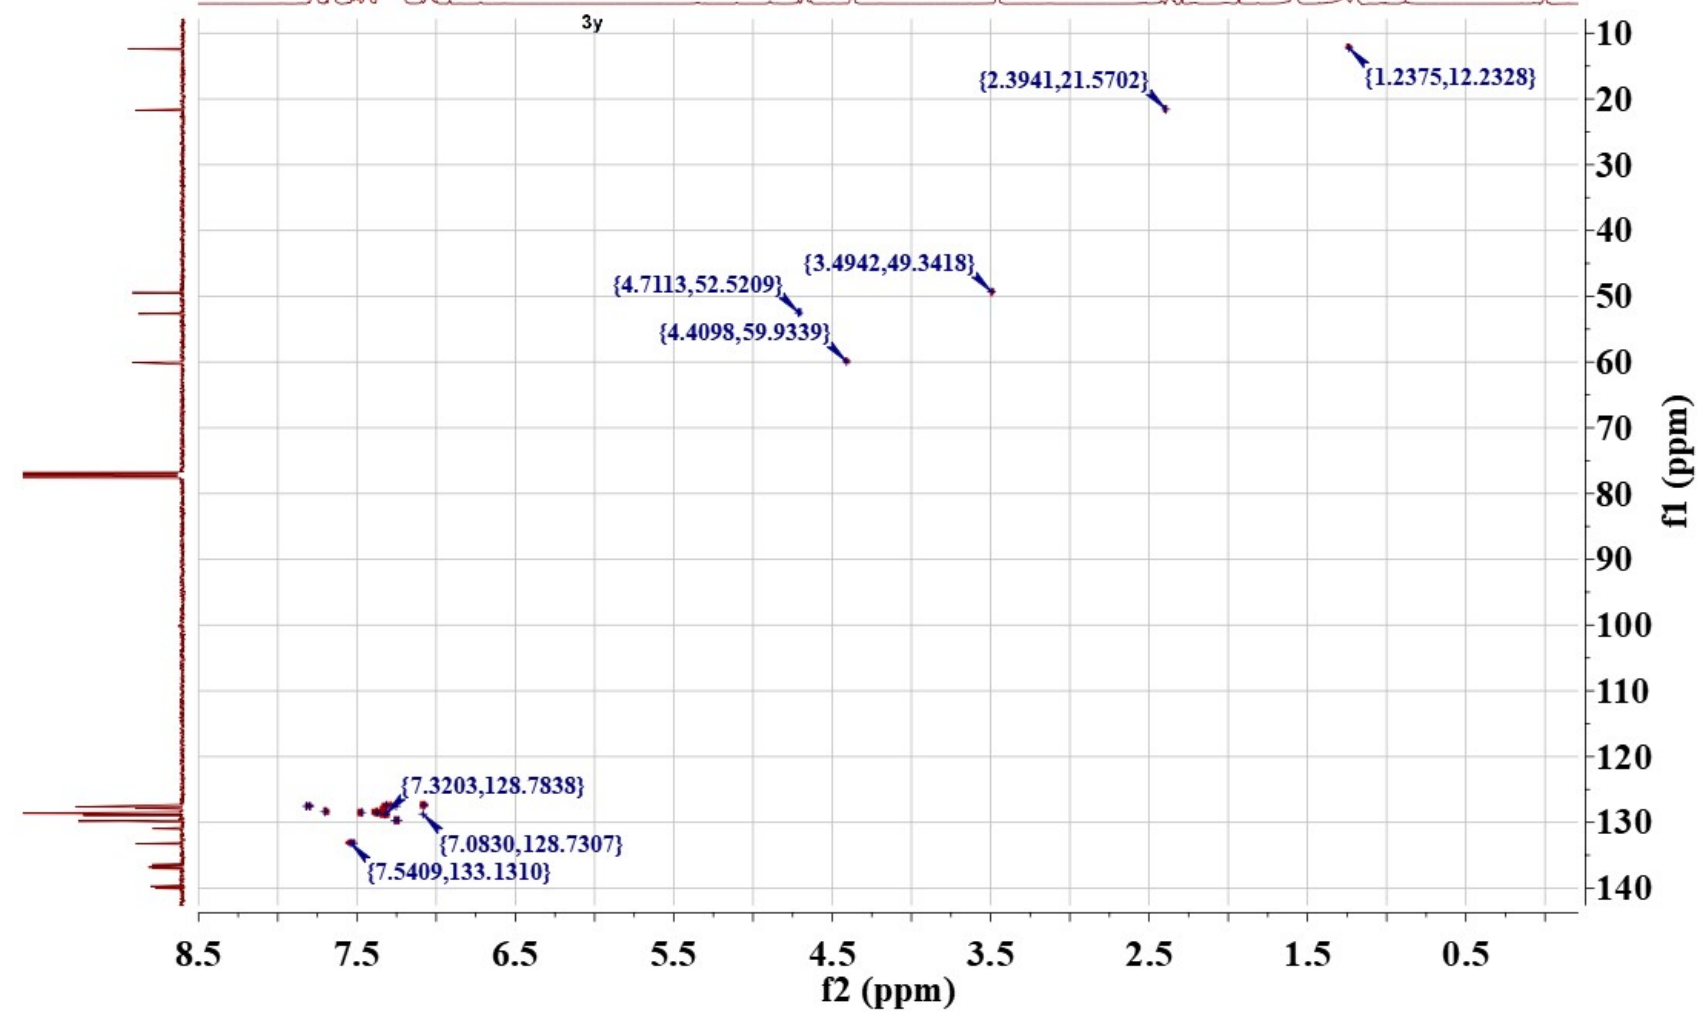



Title WJ4-1  
Solvent CDCl3  
Experiment 2D-HSQC-EDITED  
Spectrometer Frequency (400.13, 100.61)  
Nucleus (1H, 13C)

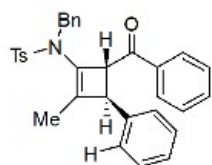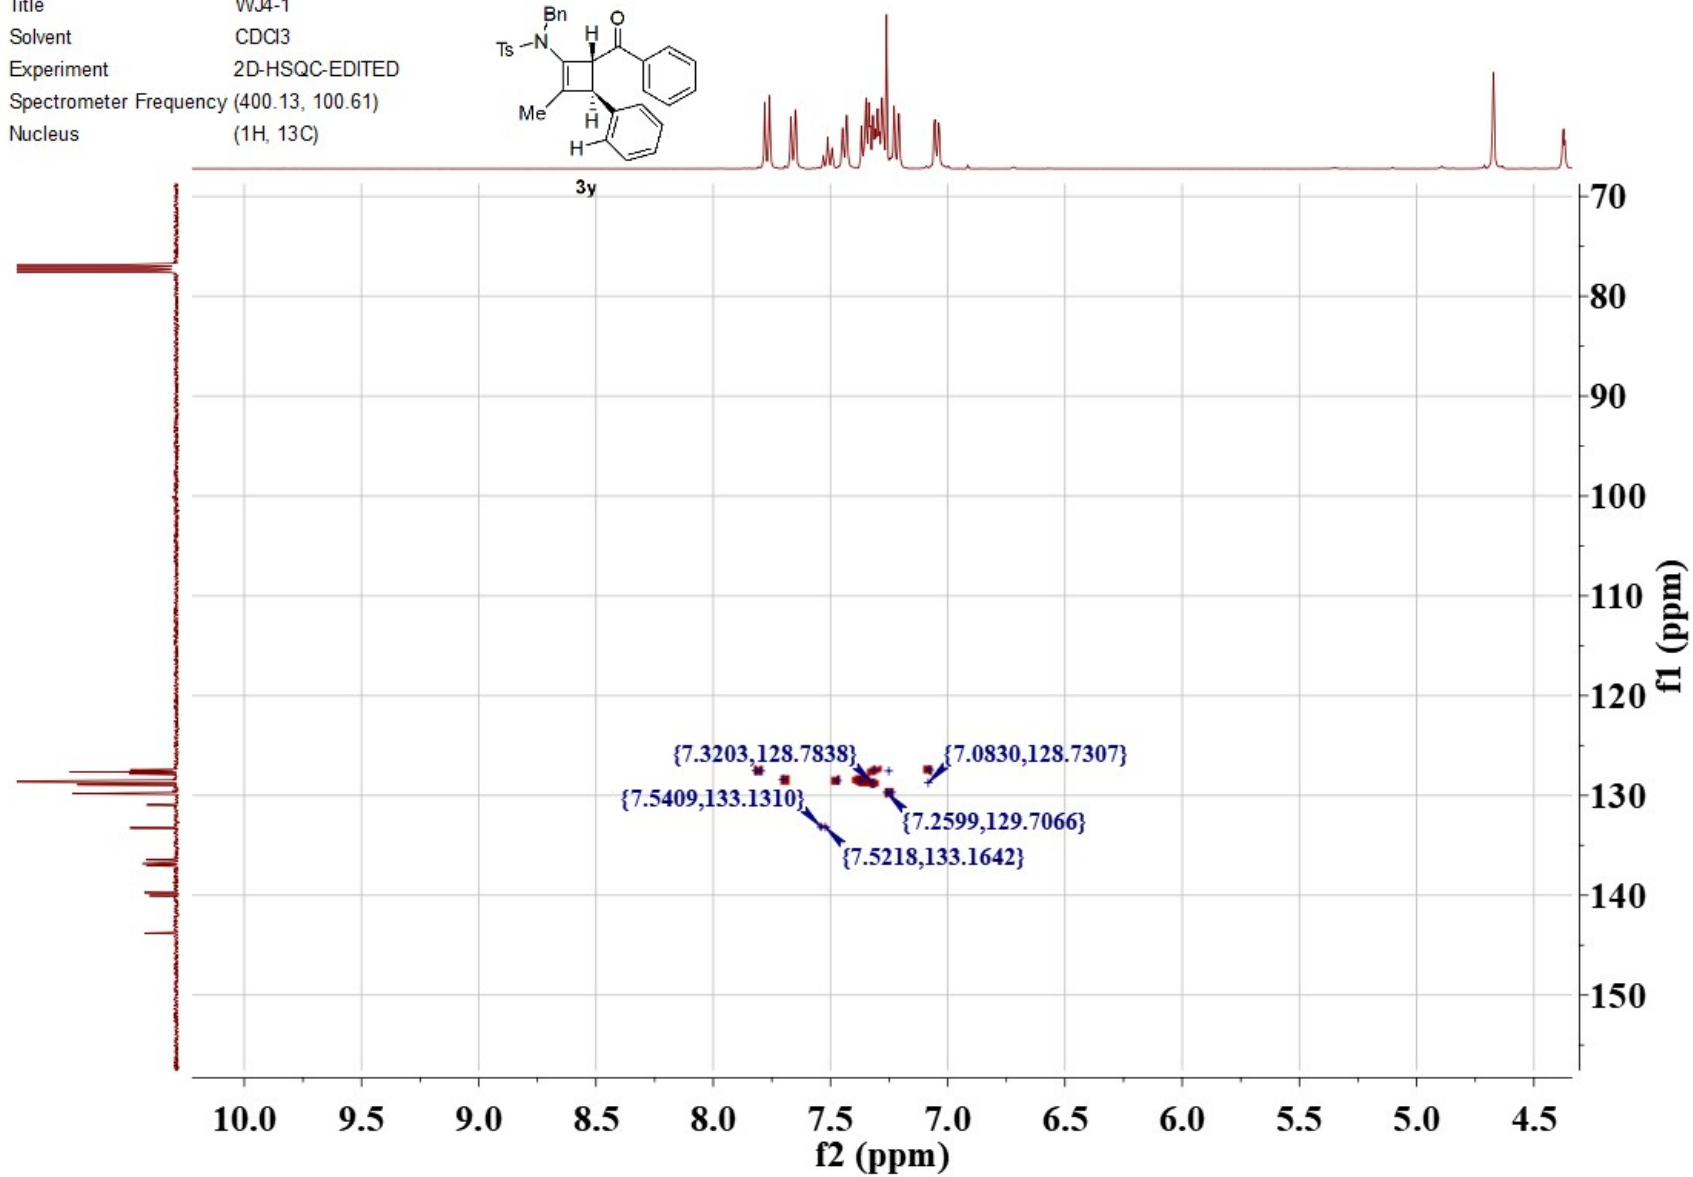

Title WJ4-1  
Solvent CDCl3  
Experiment 2D-HMBC  
Spectrometer Frequency (400.13, 100.61)  
Nucleus (1H, 13C)

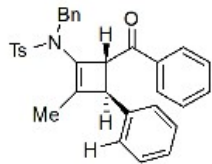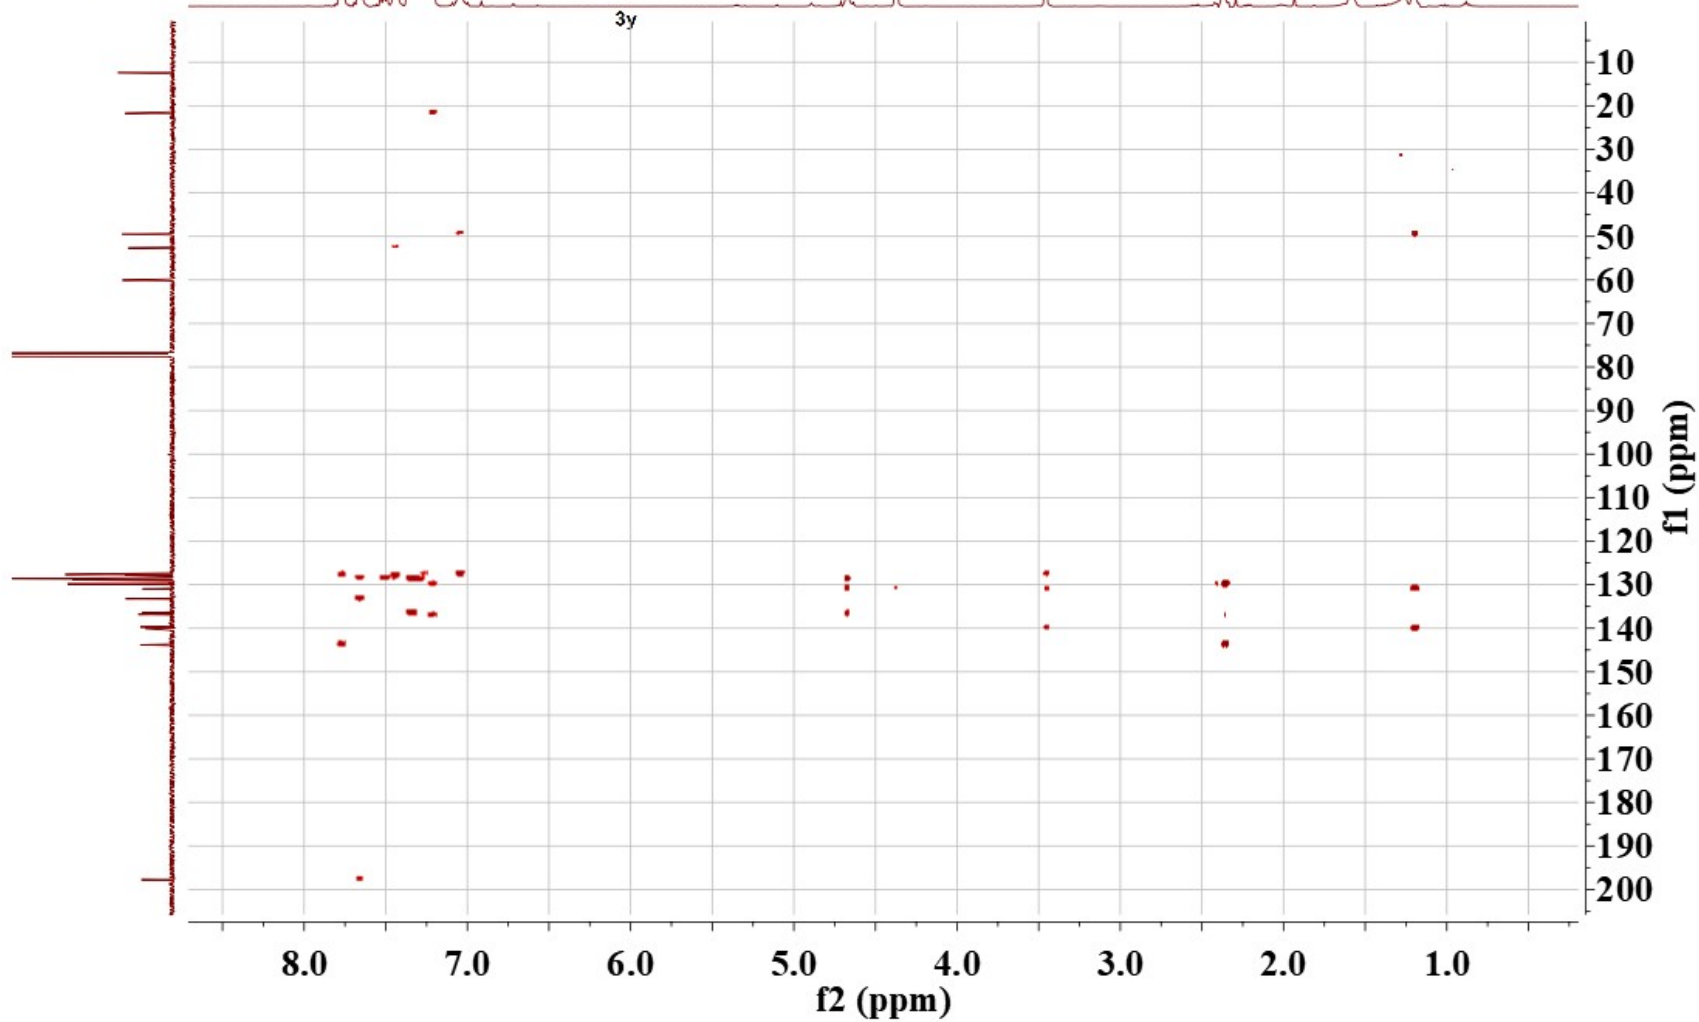

Title WJ4-1  
Solvent CDCl3  
Experiment 2D-HMBC  
Spectrometer Frequency (400.13 | 100.61)  
Nucleus (1H, 13C)

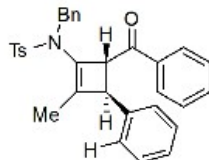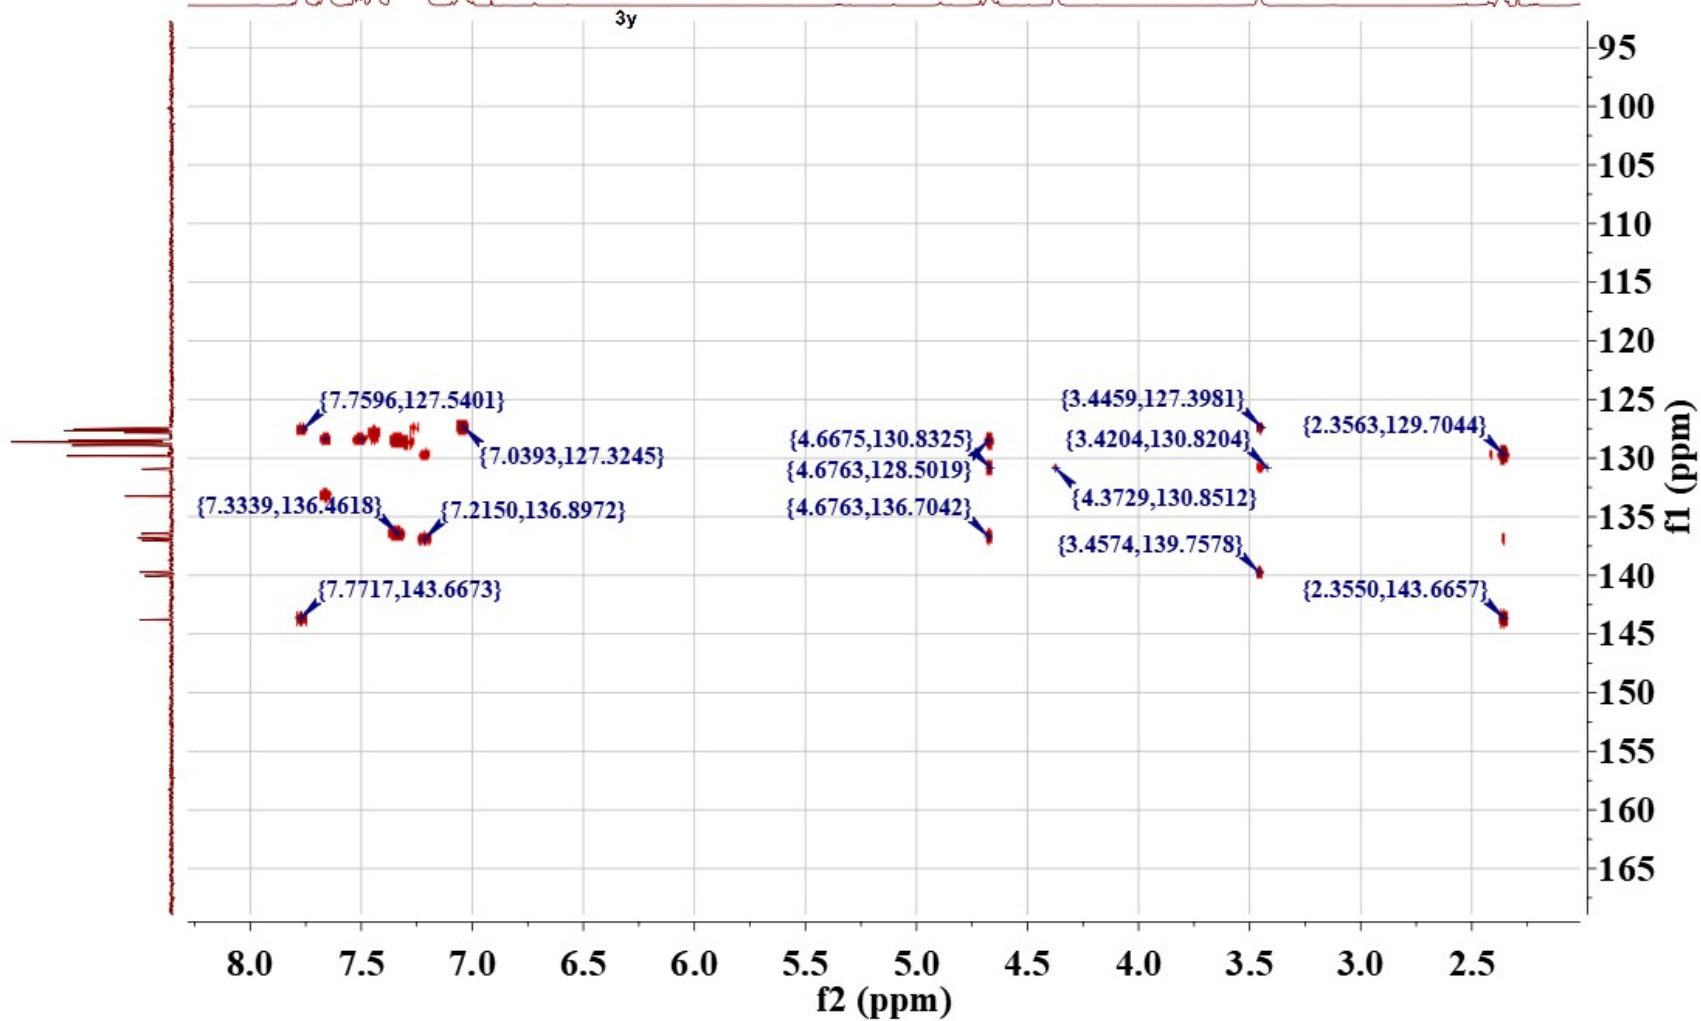

Title WJ5-47  
Solvent CDCl3  
Experiment 2D-NOESY  
Spectrometer Frequency (400.13, 400.13)  
Nucleus (1H, 1H)

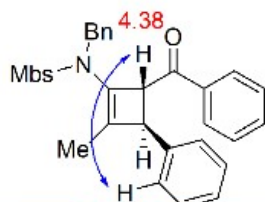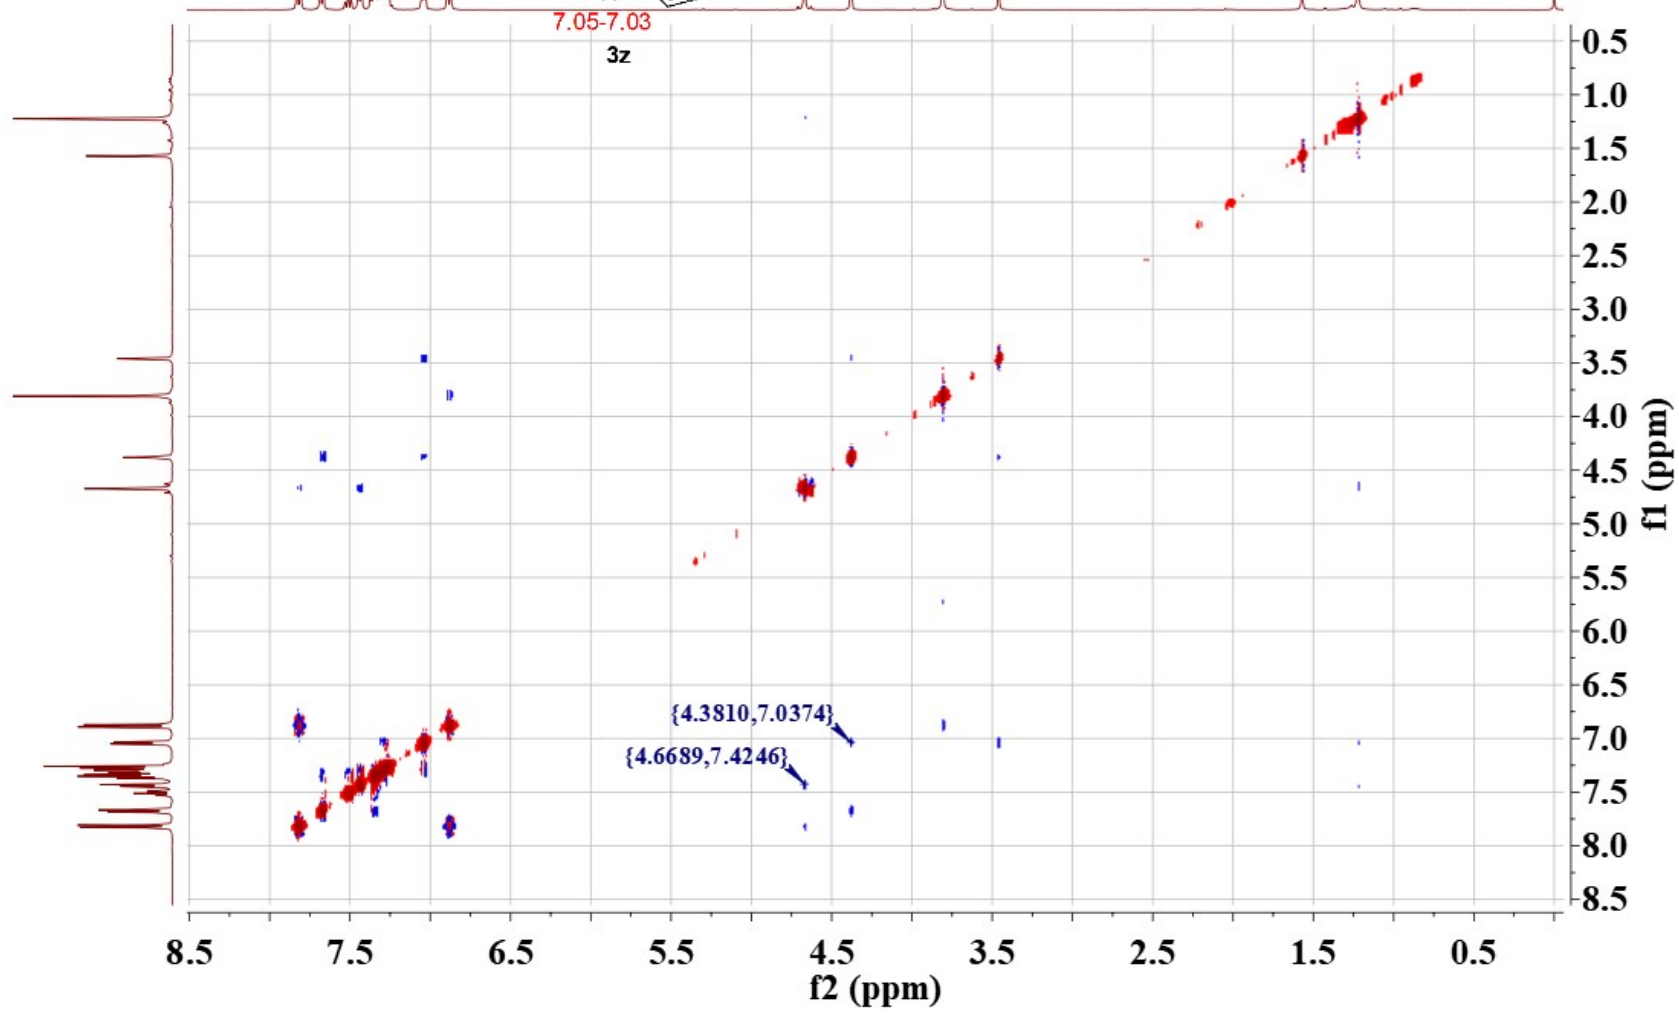

Title WJ5-47  
Solvent CDCl3  
Experiment 2D-NOESY  
Spectrometer Frequency (400.13, 400.13)  
Nucleus (1H, 1H)

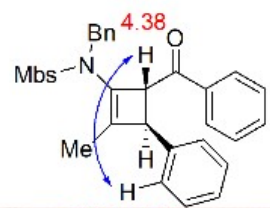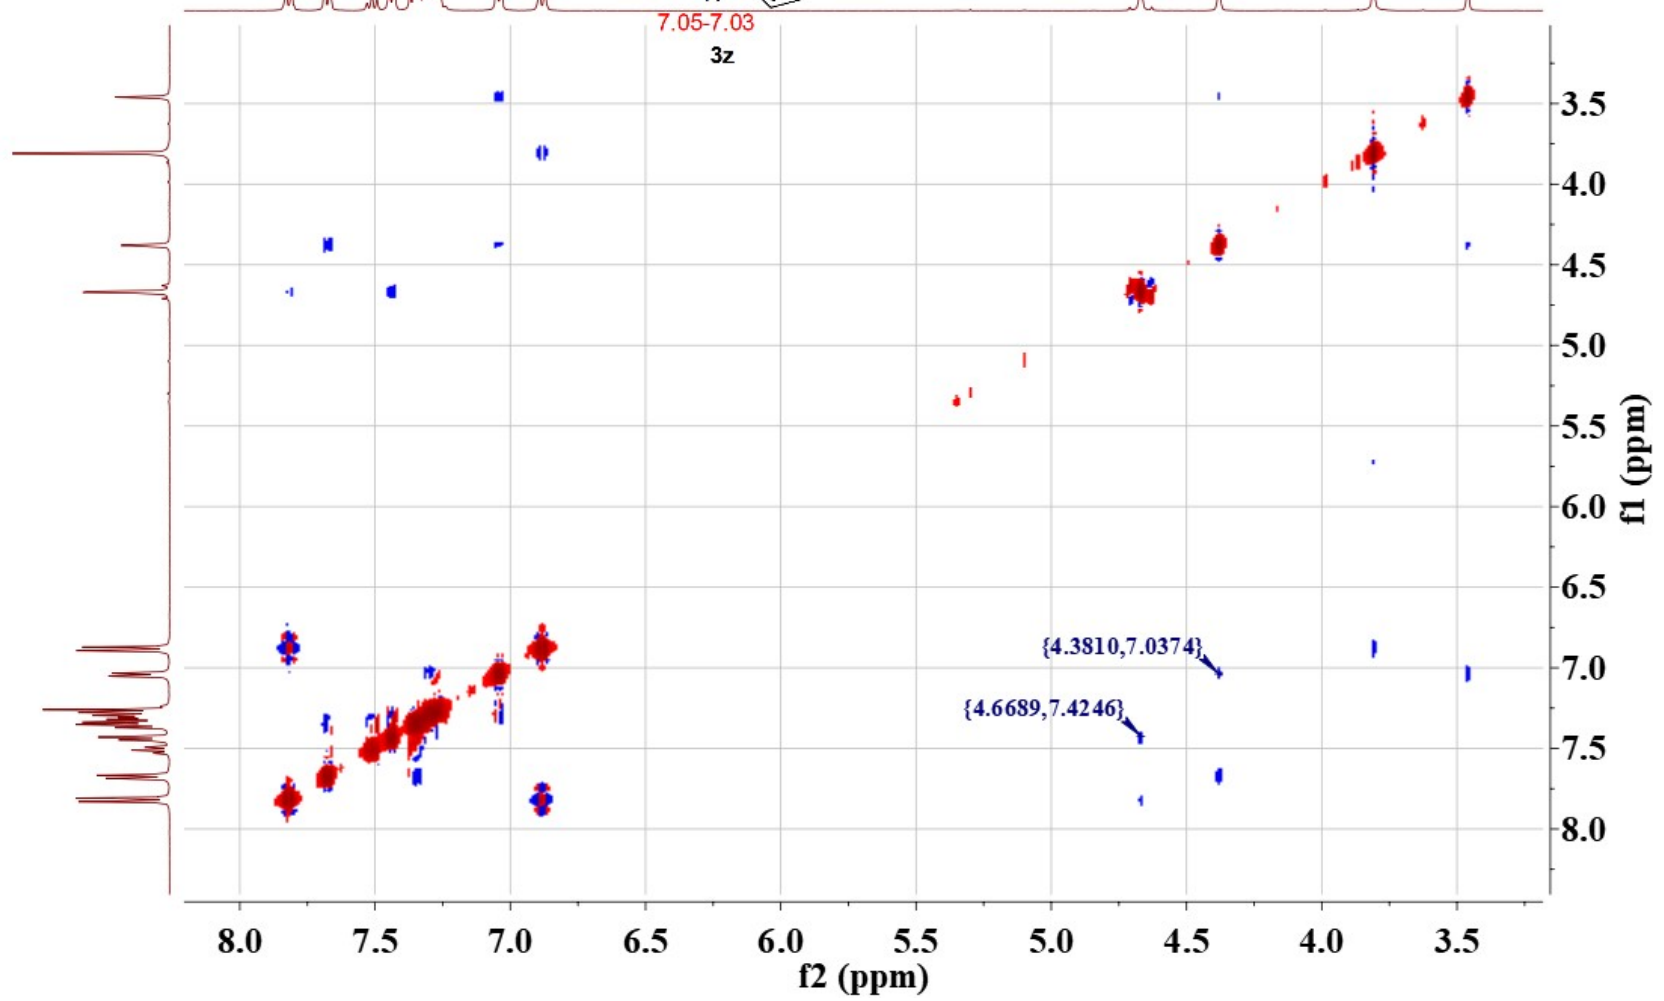

Title WJ5-47  
Solvent CDCl3  
Experiment 2D-COSY  
Spectrometer Frequency (400.13, 400.13)  
Nucleus (1H, 1H)

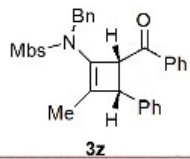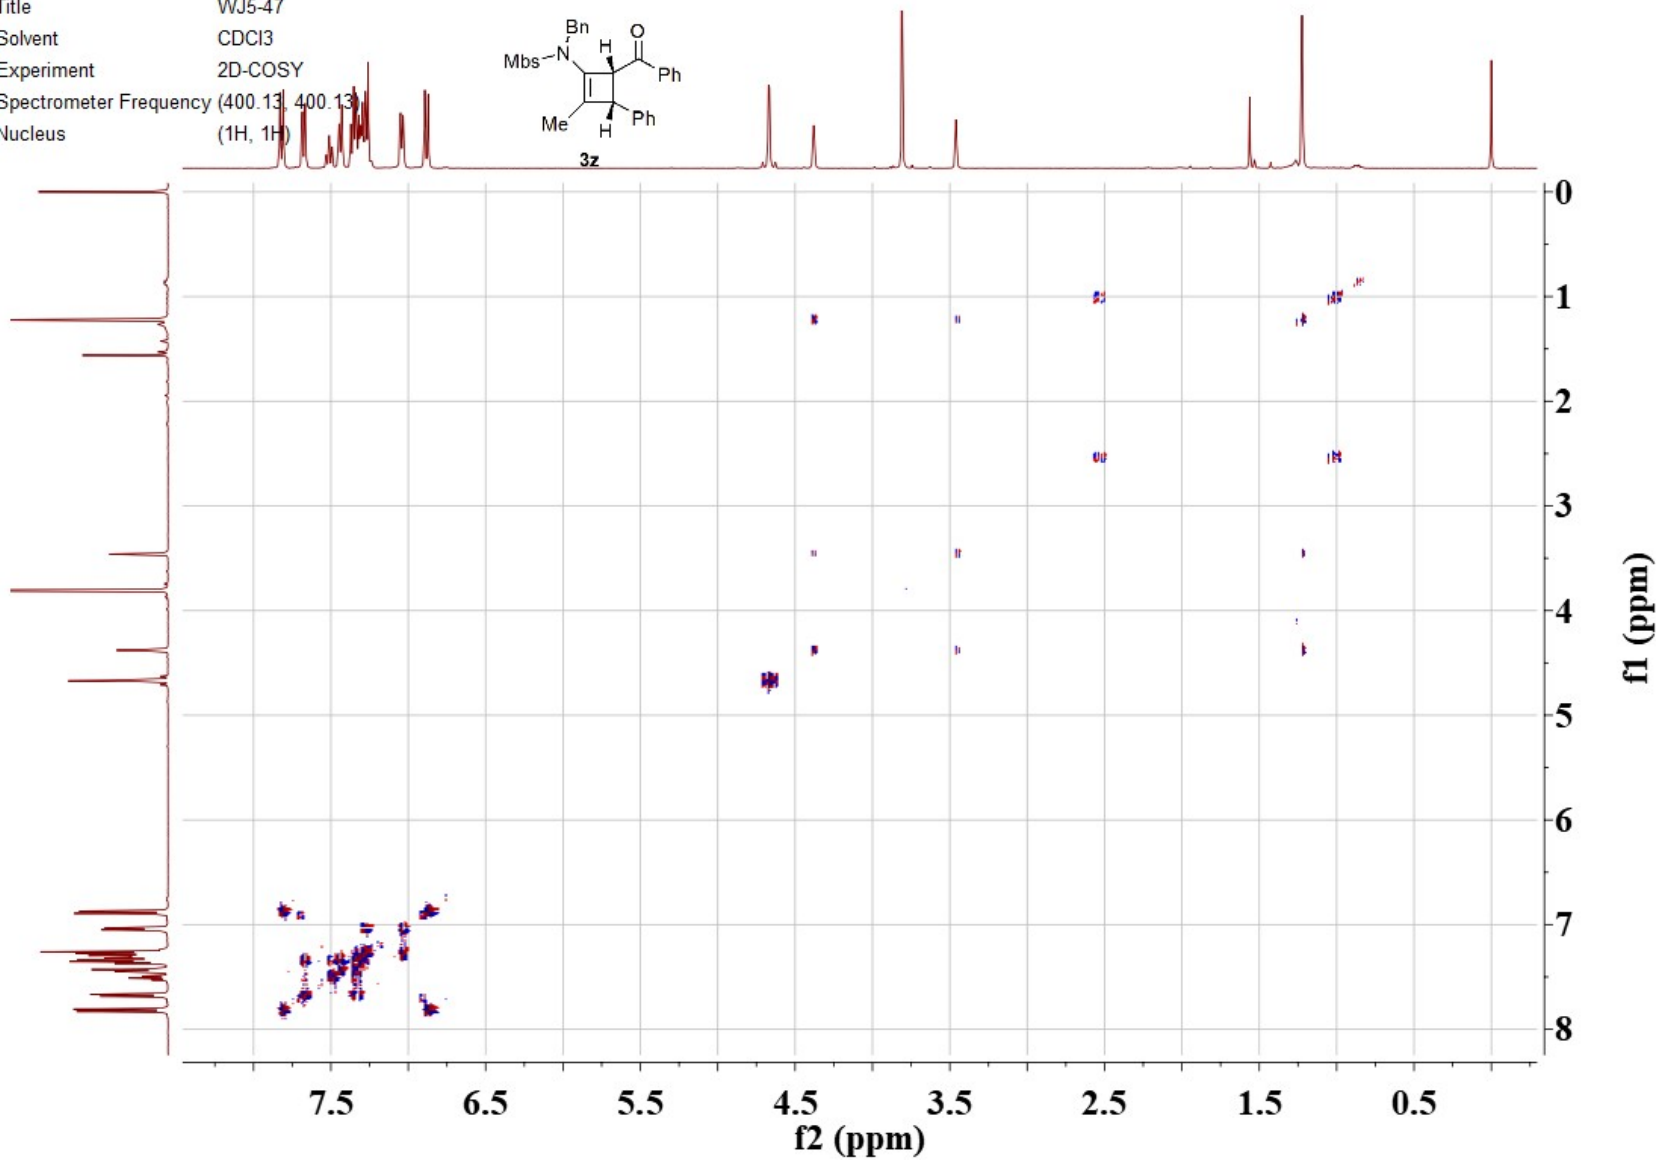

Title WJ5-47  
Solvent CDCl3  
Experiment 2D-COSY  
Spectrometer Frequency (400.13, 400.13)  
Nucleus (1H, 1H)

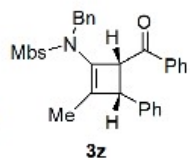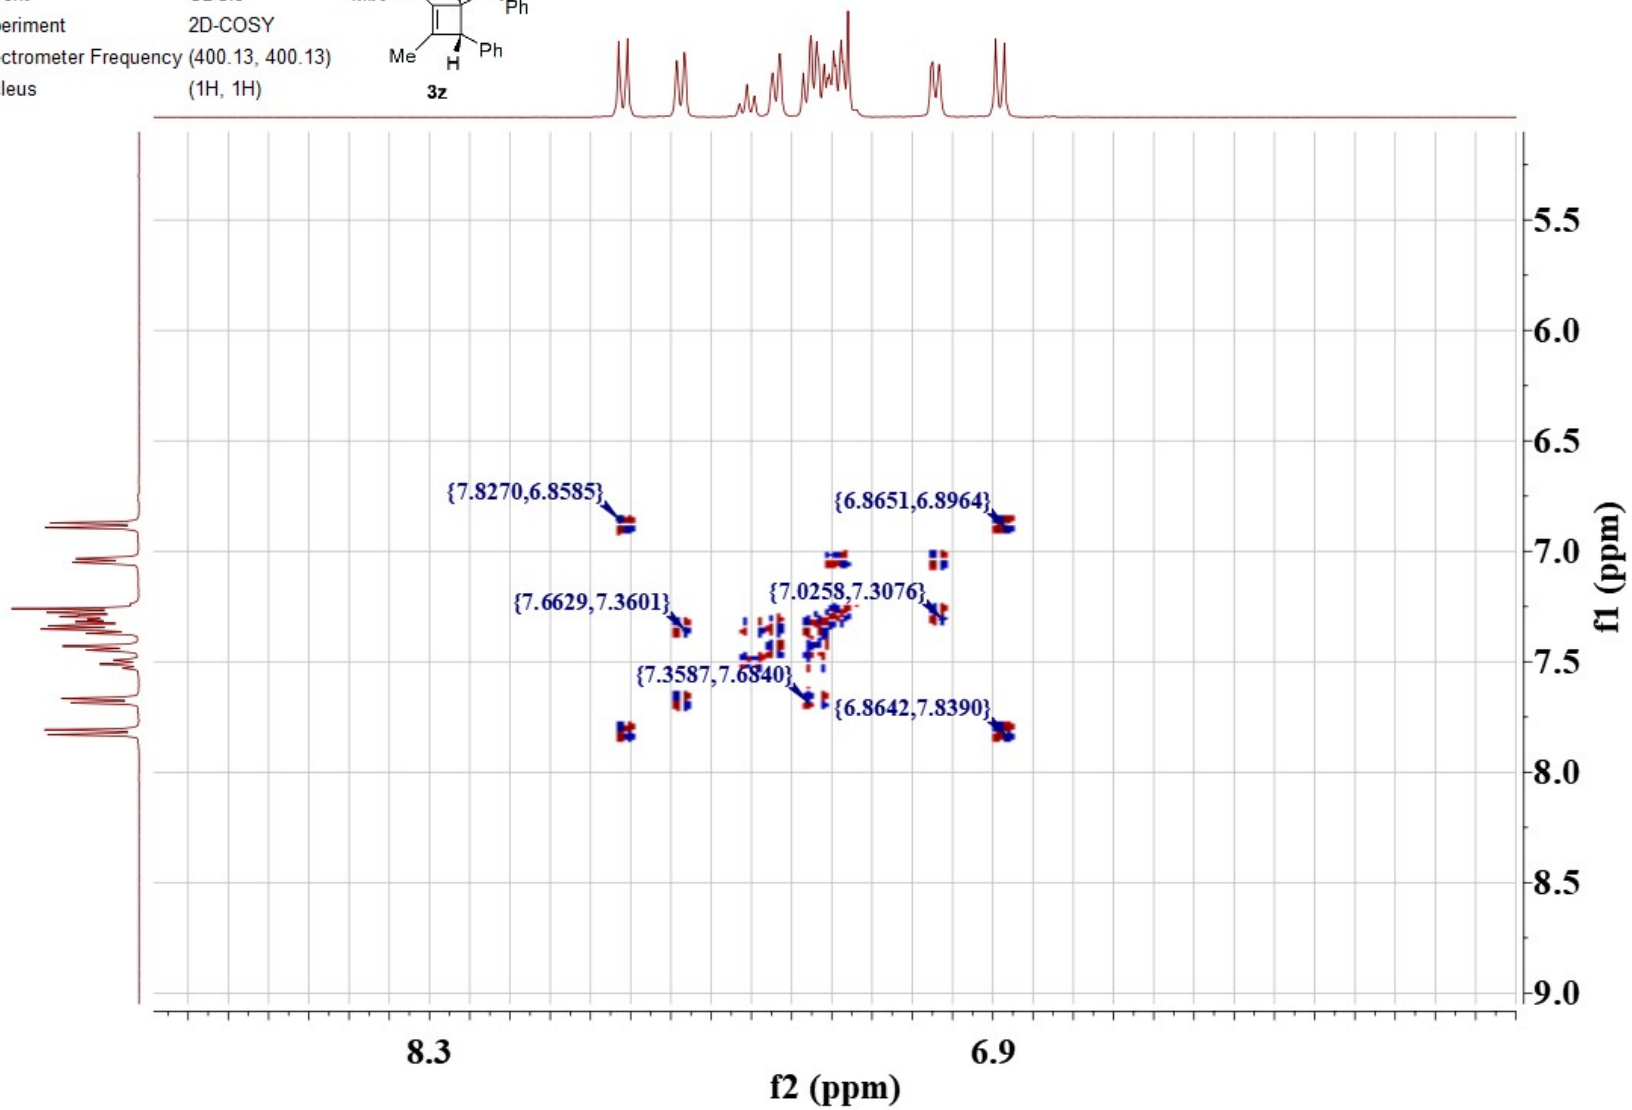



Title WJ5-47  
Solvent CDCl3  
Experiment 2D-HSQC-EDITED  
Spectrometer Frequency (400.13, 100.61)  
Nucleus (1H, 13C)

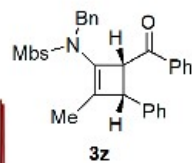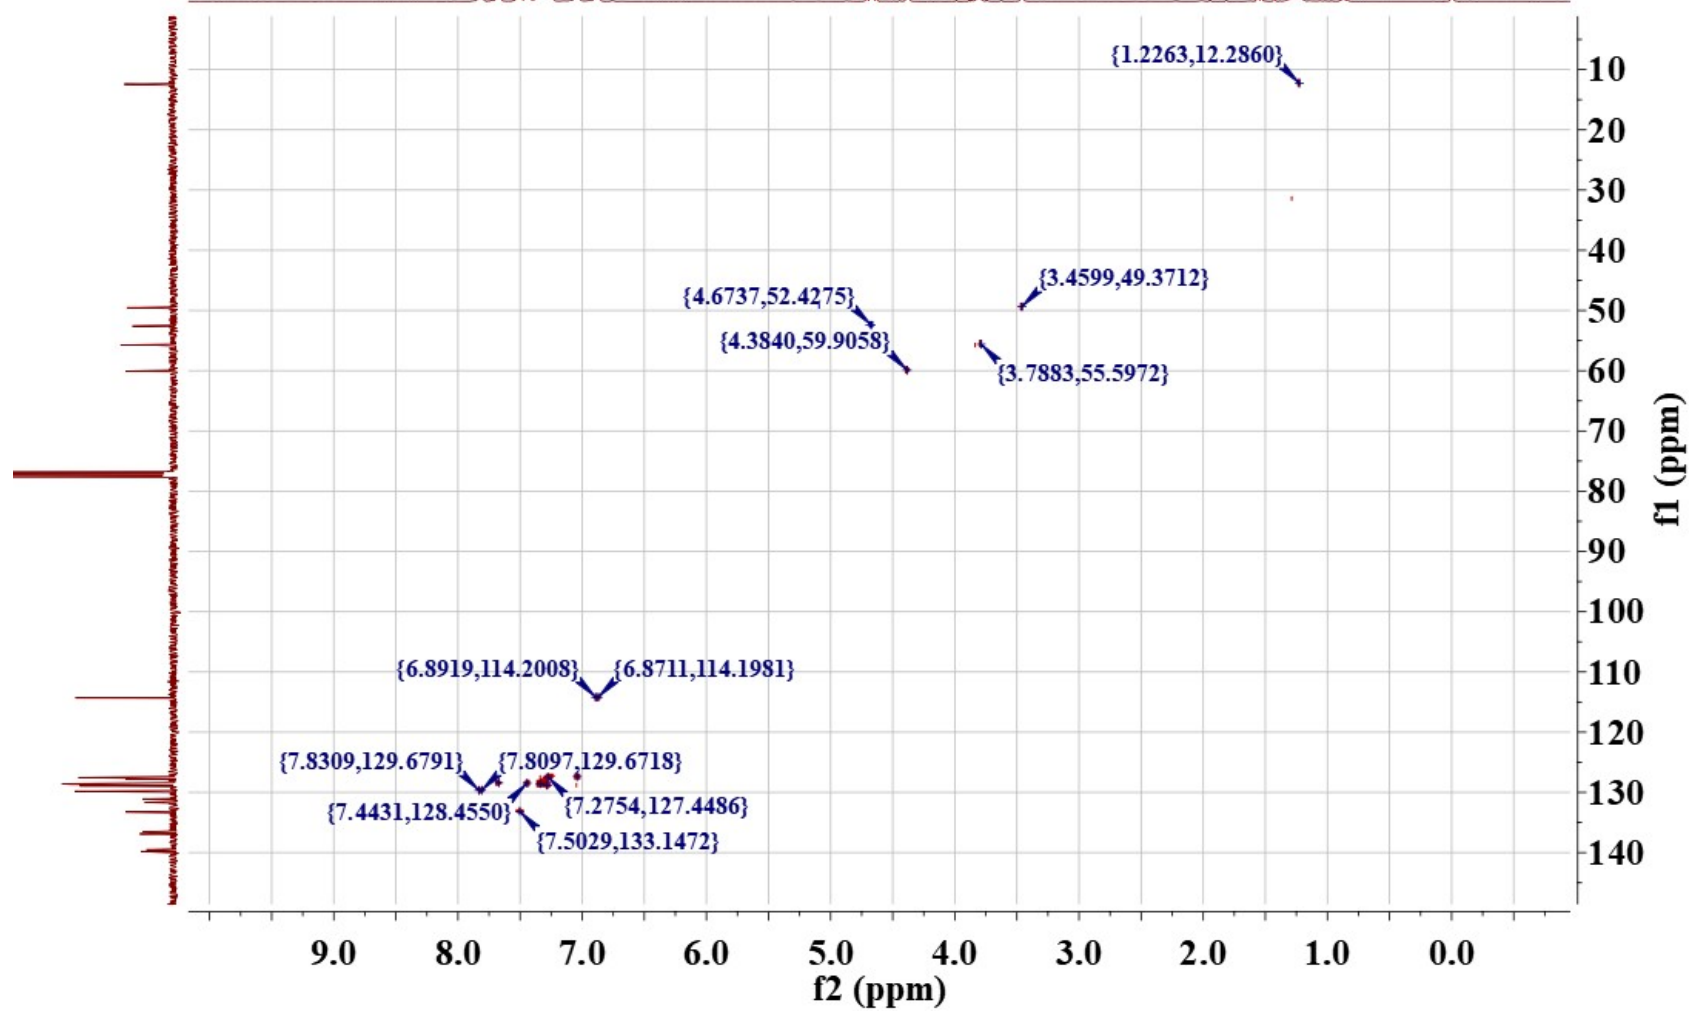

Title WJ5-47  
Solvent CDCl3  
Experiment 2D-HSQC-EDITED  
Spectrometer Frequency (400.13, 100.61)  
Nucleus (1H, 13C)

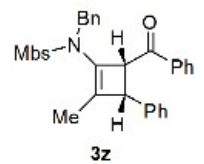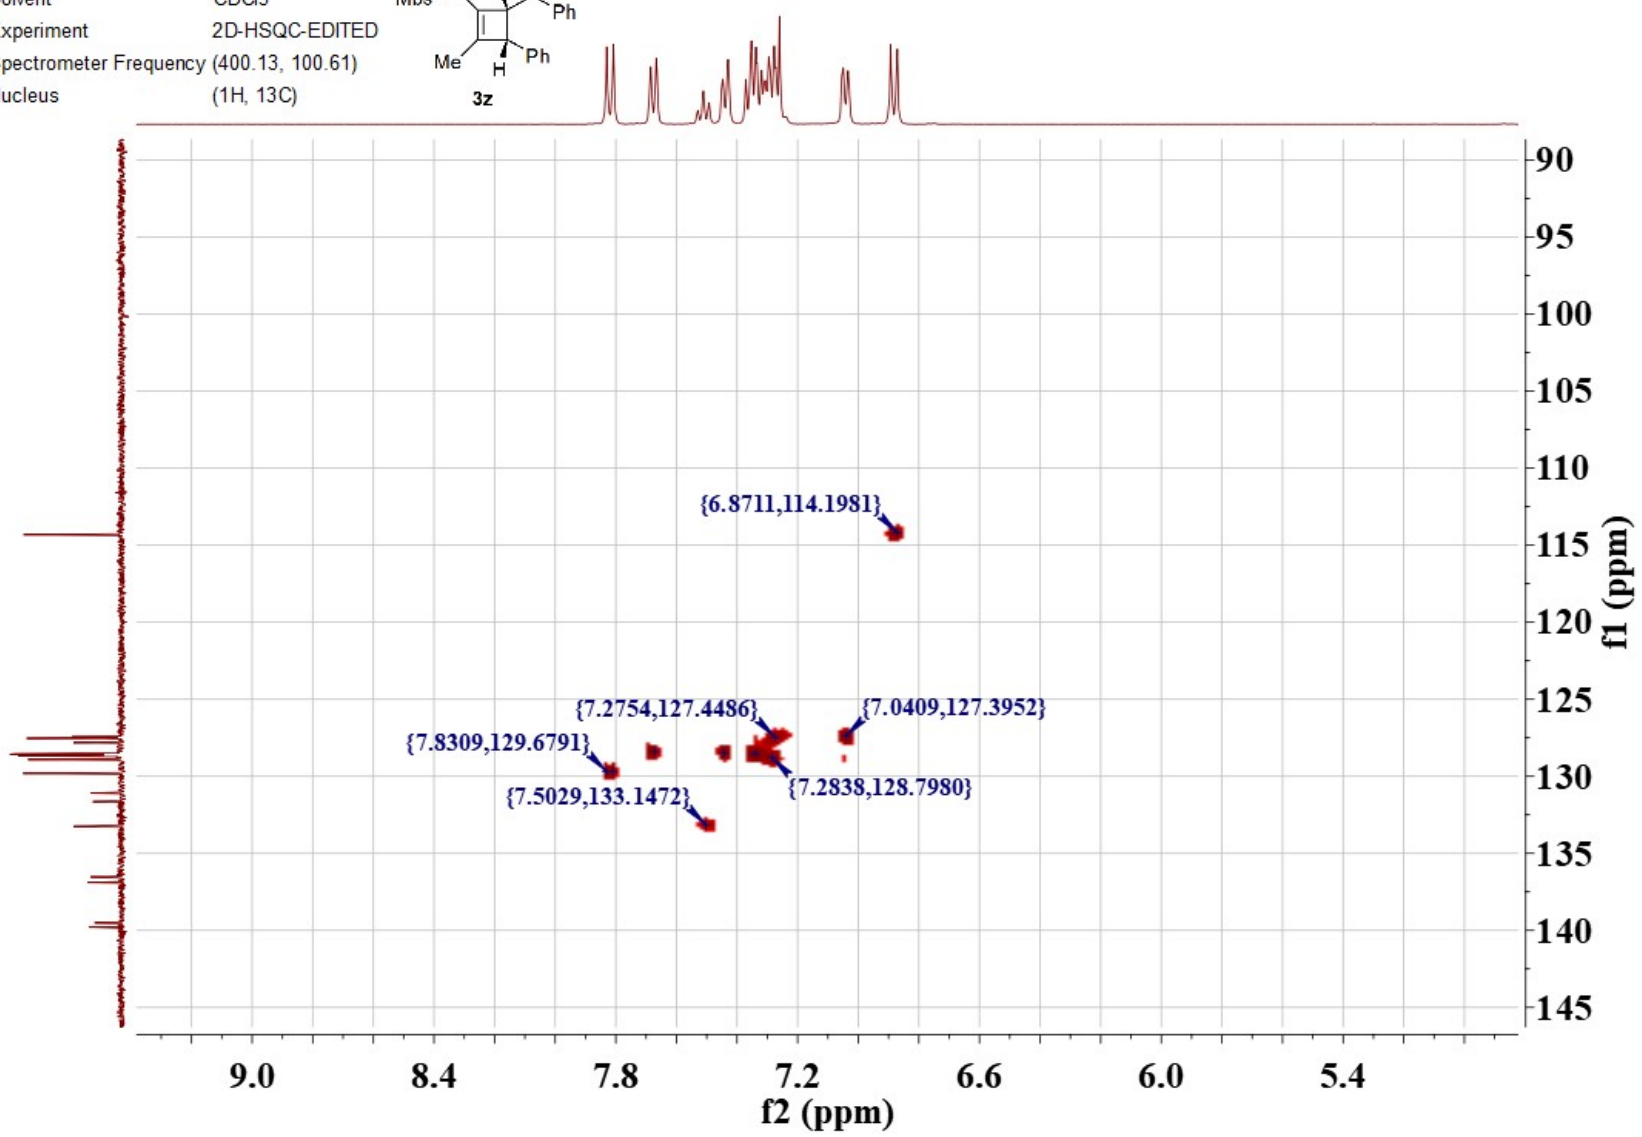

Title WJ5-47  
Solvent CDCl3  
Experiment 2D-HMBC  
Spectrometer Frequency (400.13, 100.61)  
Nucleus (1H, 13C)

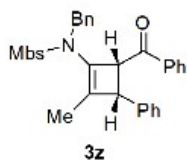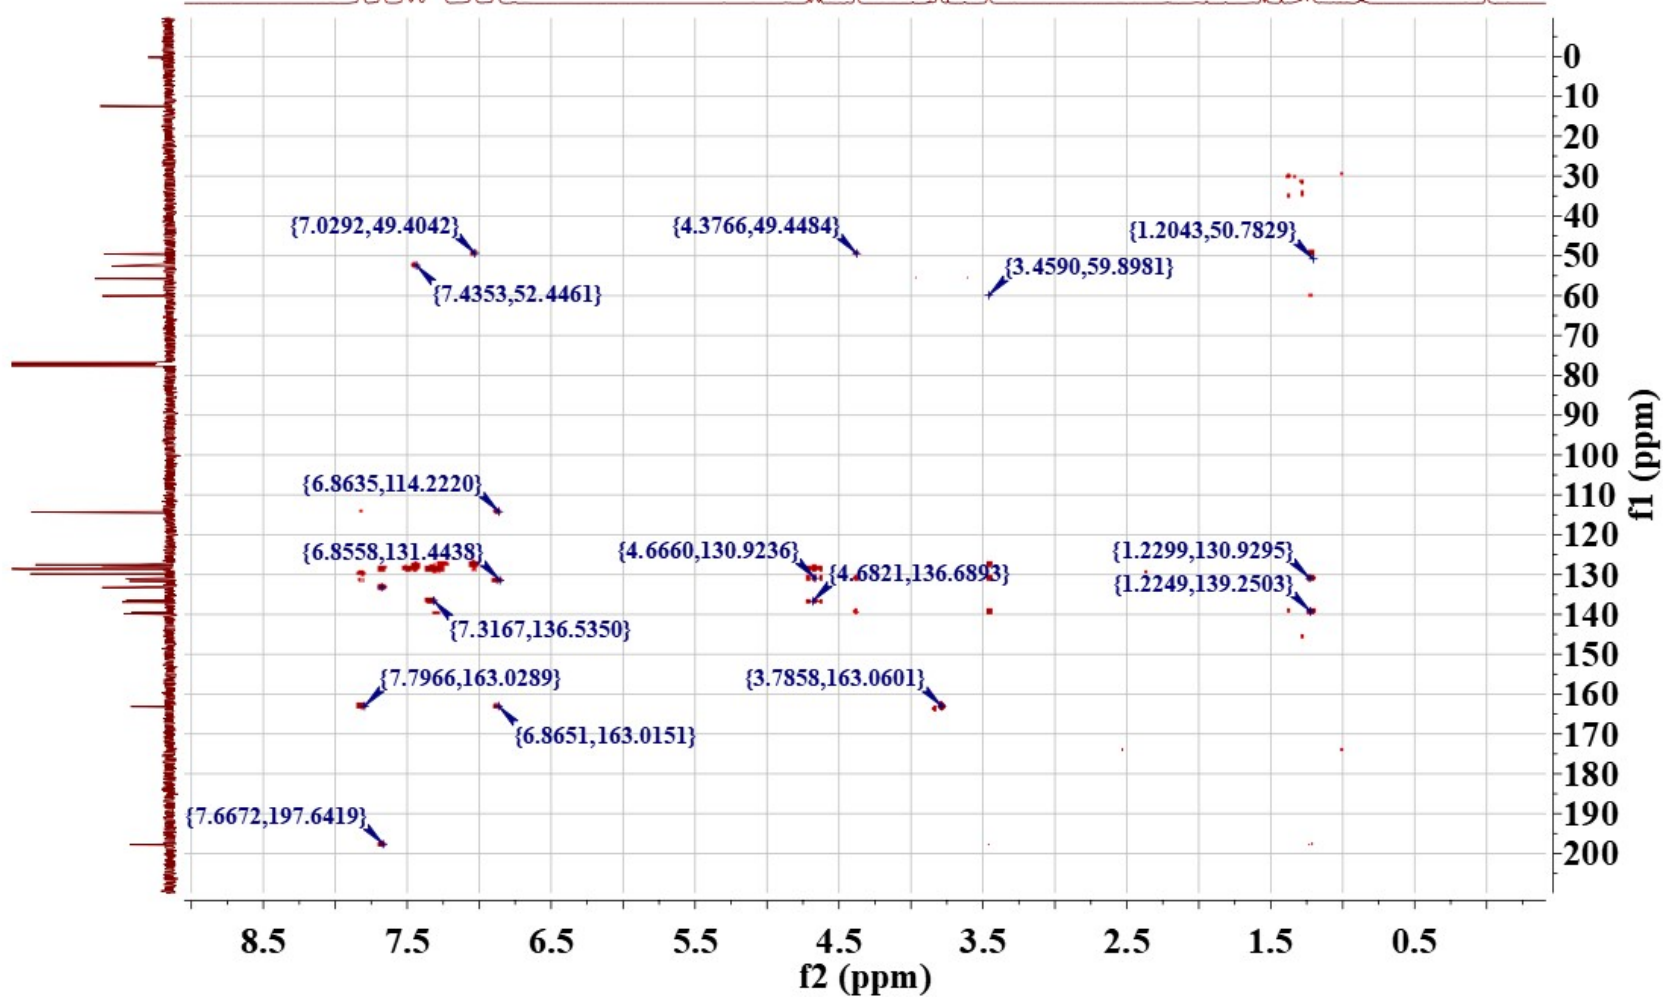

Title WJ5-47  
Solvent CDCl3  
Experiment 2D-HMBC  
Spectrometer Frequency (400.13, 100.61)  
Nucleus (1H, 13C)

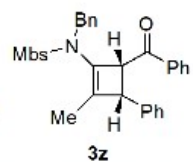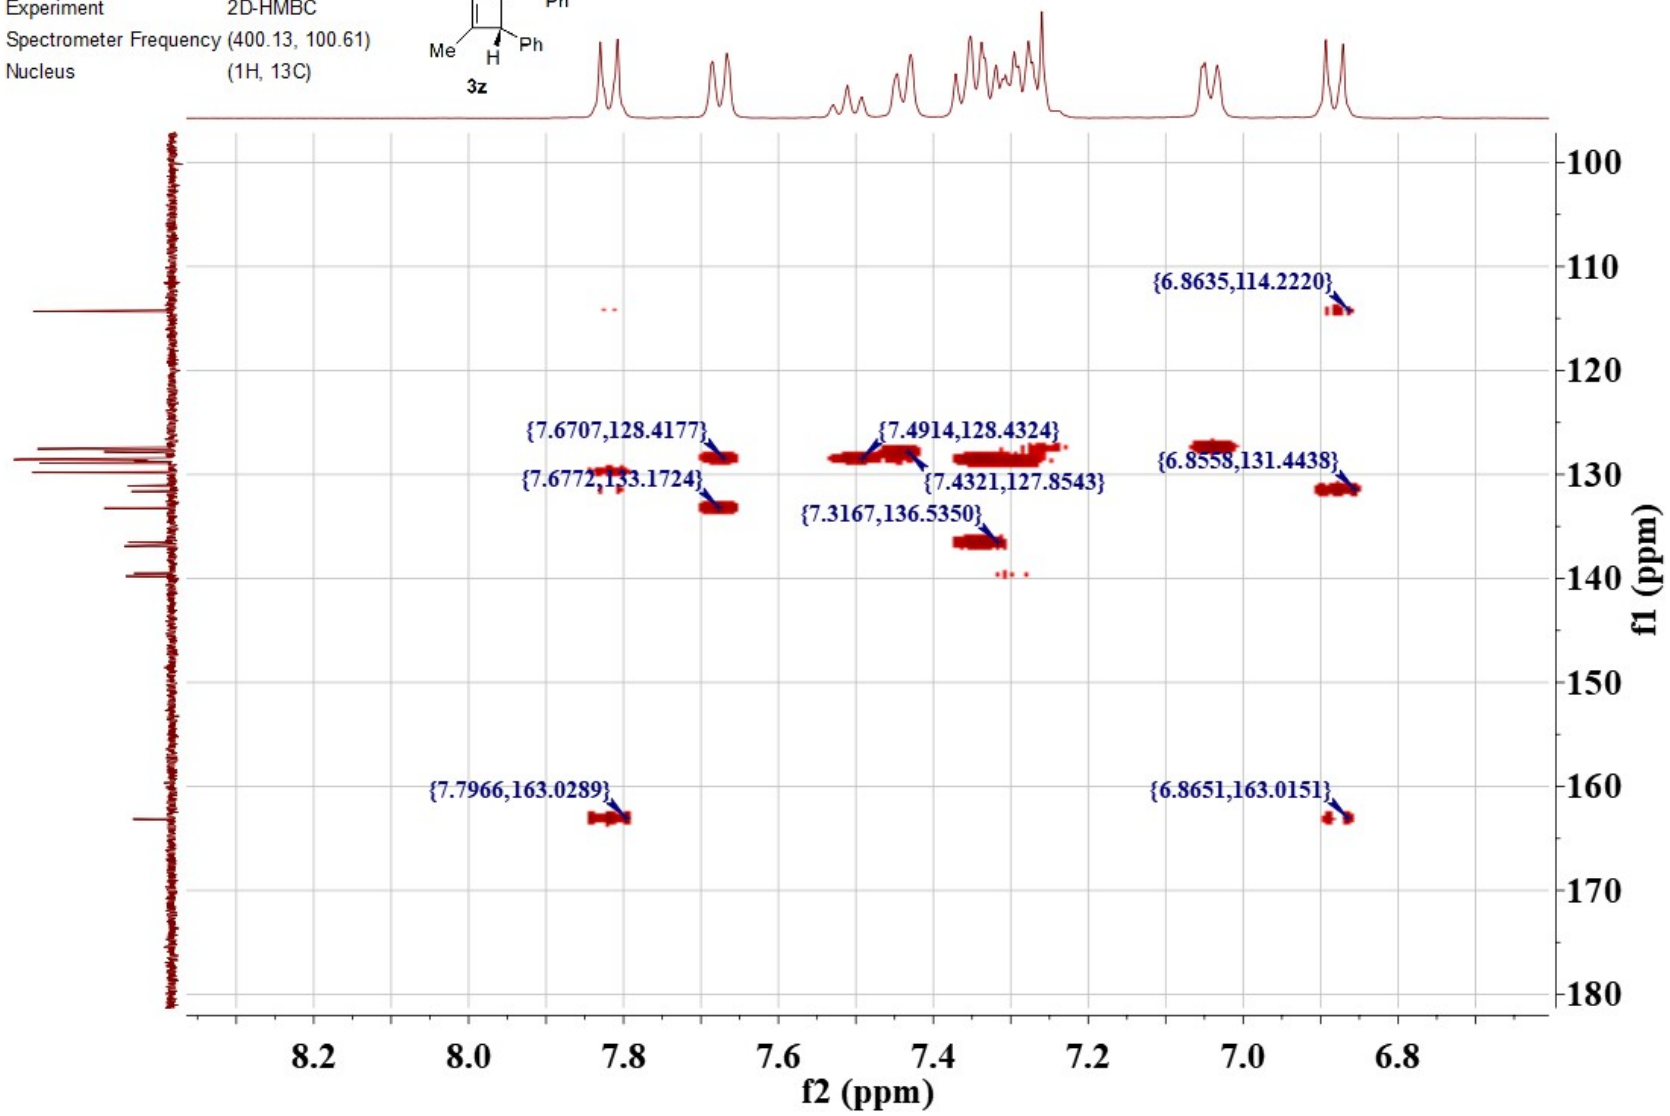

Supplement: d4ob00470a2.pdf [file d4ob00470a2.pdf]
